# Supplementary material
Source: publisher site journal article supplement (https://neobiota.pensoft.net/article/82964/download/suppl/31/)
Supplement: Supplementary file 1

## AS-ISK v2

| Taxon and Assessor details         |                                         |
|------------------------------------|-----------------------------------------|
| Category                           | Fishes and Lampreys (freshwater)        |
| Taxon name                         | <i>Coregonus albula</i>                 |
| Common name                        | vendace                                 |
| Assessor                           | Ana Marić                               |
| Risk screening context             |                                         |
| Reason and socio-economic benefits |                                         |
| Risk assessment area               | Danube & Adriatic basins BA, HR, ME, RS |
| Taxonomy                           |                                         |
| Native range                       |                                         |
| Introduced range                   |                                         |
| URL                                |                                         |

|                                                |      | Response                                                                                                                                                                | Justification (references and/or other information) | Confidence                                                                                                                                                                                                                                    |           |
|------------------------------------------------|------|-------------------------------------------------------------------------------------------------------------------------------------------------------------------------|-----------------------------------------------------|-----------------------------------------------------------------------------------------------------------------------------------------------------------------------------------------------------------------------------------------------|-----------|
| A. Biogeography/Historical                     |      |                                                                                                                                                                         |                                                     |                                                                                                                                                                                                                                               |           |
| 1. Domestication/Cultivation                   |      |                                                                                                                                                                         |                                                     |                                                                                                                                                                                                                                               |           |
| 1                                              | 1.01 | Has the taxon been the subject of domestication (or cultivation) for at least 20 generations?                                                                           | Yes                                                 | Management of vendace ( <i>Coregonus albula</i> (L.)) in the lakes of northwest Poland in the late twentieth and early twenty-first centuries. 2006. Przemysław Czerniejewski Wawrzyniec                                                      | Very high |
| 2                                              | 1.02 | Is the taxon harvested in the wild and likely to be sold or used in its live form?                                                                                      | Yes                                                 | Management of vendace ( <i>Coregonus albula</i> (L.)) in the lakes of northwest Poland in the late twentieth and early twenty-first centuries. 2006. Przemysław Czerniejewski Wawrzyniec                                                      | Very high |
| 3                                              | 1.03 | Does the taxon have invasive races, varieties, sub-taxa or congeners?                                                                                                   | Yes                                                 | <a href="https://www.cabi.org/isc/datasheet/88207">https://www.cabi.org/isc/datasheet/88207</a> invasive itself                                                                                                                               | High      |
| 2. Climate, distribution and introduction risk |      |                                                                                                                                                                         |                                                     |                                                                                                                                                                                                                                               |           |
| 4                                              | 2.01 | How similar are the climatic conditions of the Risk Assessment (RA) area and the taxon's native range?                                                                  | Medium                                              | Climach                                                                                                                                                                                                                                       | High      |
| 5                                              | 2.02 | What is the quality of the climate matching data?                                                                                                                       | Medium                                              | <a href="https://www.cabi.org/isc/datasheet/88207">https://www.cabi.org/isc/datasheet/88207</a>                                                                                                                                               | Medium    |
| 6                                              | 2.03 | Is the taxon already present outside of captivity in the RA area?                                                                                                       | No                                                  | Identifying threats from introduced and translocated non-native freshwater fishes in neighbouring countries under current and future climatic conditions Tena Radočaj a, Ivan Špelić a, Lorenzo Vilizzi b, *, Meta Povž c, Marina Piria. 2021 | Very high |
| 7                                              | 2.04 | How many potential vectors could the taxon use to enter in the RA area?                                                                                                 | One                                                 | <a href="https://www.cabi.org/isc/datasheet/88207#toriskOfIntroduction">https://www.cabi.org/isc/datasheet/88207#toriskOfIntroduction</a>                                                                                                     | Very high |
| 8                                              | 2.05 | Is the taxon currently found in close proximity to, and likely to enter into, the RA area in the near future (e.g. unintentional and intentional introductions)?        | Yes                                                 | <a href="https://www.cabi.org/isc/datasheet/88207#todistributionDatabase">https://www.cabi.org/isc/datasheet/88207#todistributionDatabase</a> Table Romania                                                                                   | High      |
| 3. Invasive elsewhere                          |      |                                                                                                                                                                         |                                                     |                                                                                                                                                                                                                                               |           |
| 9                                              | 3.01 | Has the taxon become naturalised (established viable populations) outside its                                                                                           | Yes                                                 | <a href="https://www.cabi.org/isc/datasheet/88207#todistributionDatabase">https://www.cabi.org/isc/datasheet/88207#todistributionDatabase</a> Table                                                                                           | Very high |
| 10                                             | 3.02 | In the taxon's introduced range, are there known adverse impacts to wild stocks or commercial taxa?                                                                     | Yes                                                 | <a href="https://www.cabi.org/isc/datasheet/88207#toriskAndImpactFactors">https://www.cabi.org/isc/datasheet/88207#toriskAndImpactFactors</a>                                                                                                 | High      |
| 11                                             | 3.03 | In the taxon's introduced range, are there known adverse impacts to aquaculture?                                                                                        | No                                                  | <a href="https://www.cabi.org/isc/datasheet/88207#toriskAndImpactFactors">https://www.cabi.org/isc/datasheet/88207#toriskAndImpactFactors</a>                                                                                                 | Medium    |
| 12                                             | 3.04 | In the taxon's introduced range, are there known adverse impacts to ecosystem                                                                                           | Yes                                                 | <a href="https://www.cabi.org/isc/datasheet/88207#toriskAndImpactFactors">https://www.cabi.org/isc/datasheet/88207#toriskAndImpactFactors</a>                                                                                                 | High      |
| 13                                             | 3.05 | In the taxon's introduced range, are there known adverse socio-economic impacts?                                                                                        | No                                                  | <a href="https://www.cabi.org/isc/datasheet/88207#toriskAndImpactFactors">https://www.cabi.org/isc/datasheet/88207#toriskAndImpactFactors</a>                                                                                                 | High      |
| B. Biology/Ecology                             |      |                                                                                                                                                                         |                                                     |                                                                                                                                                                                                                                               |           |
| 4. Undesirable (or persistence) traits         |      |                                                                                                                                                                         |                                                     |                                                                                                                                                                                                                                               |           |
| 14                                             | 4.01 | Is it likely that the taxon will be poisonous or pose other risks to human health?                                                                                      | No                                                  | <a href="https://www.cabi.org/isc/datasheet/88207#toriskAndImpactFactors">https://www.cabi.org/isc/datasheet/88207#toriskAndImpactFactors</a>                                                                                                 | Very high |
| 15                                             | 4.02 | Is it likely that the taxon will smother one or more native taxa (that are not threatened or protected)?                                                                | Yes                                                 | <a href="https://www.cabi.org/isc/datasheet/88207#toriskAndImpactFactors">https://www.cabi.org/isc/datasheet/88207#toriskAndImpactFactors</a>                                                                                                 | Very high |
| 16                                             | 4.03 | Are there any threatened or protected taxa that the non-native taxon would parasitise in the RA area?                                                                   | Yes                                                 | <a href="https://www.cabi.org/isc/datasheet/88207#toriskAndImpactFactors">https://www.cabi.org/isc/datasheet/88207#toriskAndImpactFactors</a>                                                                                                 | High      |
| 17                                             | 4.04 | Is the taxon adaptable in terms of climatic and other environmental conditions, thus enhancing its potential persistence if it has invaded or could invade the RA area? | Yes                                                 | <a href="https://www.cabi.org/isc/datasheet/88207#toriskAndImpactFactors">https://www.cabi.org/isc/datasheet/88207#toriskAndImpactFactors</a>                                                                                                 | High      |
| 18                                             | 4.05 | Is the taxon likely to disrupt food-web structure/function in aquatic ecosystems if it has invaded or is likely to invade the RA                                        | No                                                  | <a href="https://www.cabi.org/isc/datasheet/88207#toriskAndImpactFactors">https://www.cabi.org/isc/datasheet/88207#toriskAndImpactFactors</a>                                                                                                 | High      |
| 19                                             | 4.06 | Is the taxon likely to exert adverse impacts on ecosystem services in the RA area?                                                                                      | No                                                  | <a href="https://www.cabi.org/isc/datasheet/88207#toriskAndImpactFactors">https://www.cabi.org/isc/datasheet/88207#toriskAndImpactFactors</a>                                                                                                 | High      |
| 20                                             | 4.07 | Is it likely that the taxon will host, and/or act as a vector for, recognised pests and infectious agents that are endemic in the RA                                    | No                                                  | <a href="https://www.cabi.org/isc/datasheet/88207#toriskAndImpactFactors">https://www.cabi.org/isc/datasheet/88207#toriskAndImpactFactors</a>                                                                                                 | Medium    |
| 21                                             | 4.08 | Is it likely that the taxon will host, and/or act as a vector for, recognised pests and infectious agents that are absent from (novel to) the RA area?                  | Yes                                                 | Invasion of vendace <i>Coregonus albula</i> in a subarctic watercourse PA Amundsen et al 1999                                                                                                                                                 | Very high |
| 22                                             | 4.09 | Is it likely that the taxon will achieve a body size that will make it more likely to be released from captivity?                                                       | No                                                  | <a href="https://www.cabi.org/isc/datasheet/88207#todescription">https://www.cabi.org/isc/datasheet/88207#todescription</a>                                                                                                                   | Very high |
| 23                                             | 4.10 | Is the taxon capable of sustaining itself in a range of water velocity conditions (e.g. versatile in habitat use)?                                                      | No                                                  | Effects of temperature, swimming speed and body mass on standard and active metabolic rate in vendace ( <i>Coregonus albula</i> ) Jan Ohlberger, Georg Staaks & Franz Hölker 2007                                                             | High      |
| 24                                             | 4.11 | Is it likely that the taxon's mode of existence (e.g. excretion of by-products) or behaviours (e.g. feeding) will reduce habitat quality for native taxa?               | No                                                  | <a href="https://www.cabi.org/isc/datasheet/88207#tobiologyAndEcology">https://www.cabi.org/isc/datasheet/88207#tobiologyAndEcology</a>                                                                                                       | High      |

|                                 |      |                                                                                                                                                                              |           |                                                                                                                                                                   |           |
|---------------------------------|------|------------------------------------------------------------------------------------------------------------------------------------------------------------------------------|-----------|-------------------------------------------------------------------------------------------------------------------------------------------------------------------|-----------|
| 25                              | 4.12 | Is the taxon likely to maintain a viable population even when present in low densities (or persisting in adverse conditions by way of a dormant form)?                       | Yes       | <a href="https://www.cabi.org/isc/datasheet/88207#tobiologyAndEcology">https://www.cabi.org/isc/datasheet/88207#tobiologyAndEcology</a>                           | High      |
| <b>5. Resource exploitation</b> |      |                                                                                                                                                                              |           |                                                                                                                                                                   |           |
| 26                              | 5.01 | Is the taxon likely to consume threatened or protected native taxa in the RA area?                                                                                           | Yes       | <a href="https://www.cabi.org/isc/datasheet/88207#tobiologyAndEcology">https://www.cabi.org/isc/datasheet/88207#tobiologyAndEcology</a>                           | High      |
| 27                              | 5.02 | Is the taxon likely to sequester food resources (including nutrients) to the detriment of native taxa in the RA area?                                                        | Yes       | <a href="https://www.cabi.org/isc/datasheet/88207#tobiologyAndEcology">https://www.cabi.org/isc/datasheet/88207#tobiologyAndEcology</a>                           | High      |
| <b>6. Reproduction</b>          |      |                                                                                                                                                                              |           |                                                                                                                                                                   |           |
| 28                              | 6.01 | Is the taxon likely to exhibit parental care and/or to reduce age-at-maturity in response to environmental conditions?                                                       | Yes       | Year-class fluctuations in vendace, <i>Coregonus albula</i> (Linnaeus): Who's got the upper hand in intraspecific competition? OT Sandlund et al 1991             | High      |
| 29                              | 6.02 | Is the taxon likely to produce viable gametes or propagules (in the RA area)?                                                                                                | No        | <a href="https://www.cabi.org/isc/datasheet/88207#tohistoryOfIntroductionAndSpread">https://www.cabi.org/isc/datasheet/88207#tohistoryOfIntroductionAndSpread</a> | Medium    |
| 30                              | 6.03 | Is the taxon likely to hybridise naturally with native taxa?                                                                                                                 | No        | <a href="https://www.cabi.org/isc/datasheet/88207#tohistoryOfIntroductionAndSpread">https://www.cabi.org/isc/datasheet/88207#tohistoryOfIntroductionAndSpread</a> | High      |
| 31                              | 6.04 | Is the taxon likely to be hermaphroditic or to display asexual reproduction?                                                                                                 | No        | <a href="https://www.cabi.org/isc/datasheet/88207#tohistoryOfIntroductionAndSpread">https://www.cabi.org/isc/datasheet/88207#tohistoryOfIntroductionAndSpread</a> | Very high |
| 32                              | 6.05 | Is the taxon dependent on the presence of another taxon (or specific habitat features) to complete its life cycle?                                                           | No        | <a href="https://www.cabi.org/isc/datasheet/88207#tohistoryOfIntroductionAndSpread">https://www.cabi.org/isc/datasheet/88207#tohistoryOfIntroductionAndSpread</a> | High      |
| 33                              | 6.06 | Is the taxon known (or likely) to produce a large number of propagules or offspring within a short time span (e.g. < 1 year)?                                                | Yes       | <a href="https://www.cabi.org/isc/datasheet/88207#tobiologyAndEcology">https://www.cabi.org/isc/datasheet/88207#tobiologyAndEcology</a>                           | Very high |
| 34                              | 6.07 | How many time units (days, months, years) does the taxon require to reach the age-at-first-reproduction?                                                                     | 2         | <a href="https://www.cabi.org/isc/datasheet/88207#tobiologyAndEcology">https://www.cabi.org/isc/datasheet/88207#tobiologyAndEcology</a>                           | Very high |
| <b>7. Dispersal mechanisms</b>  |      |                                                                                                                                                                              |           |                                                                                                                                                                   |           |
| 35                              | 7.01 | How many potential internal vectors/pathways could the taxon use to disperse within the RA area (with suitable vectors/pathways)?                                            | One       | <a href="https://www.cabi.org/isc/datasheet/88207#tobiologyAndEcology">https://www.cabi.org/isc/datasheet/88207#tobiologyAndEcology</a>                           | High      |
| 36                              | 7.02 | Will any of these vectors/pathways bring the taxon in close proximity to one or more protected areas (e.g. MCZ, MPA, SSSI)?                                                  | Yes       | <a href="https://www.cabi.org/isc/datasheet/88207#tobiologyAndEcology">https://www.cabi.org/isc/datasheet/88207#tobiologyAndEcology</a>                           | High      |
| 37                              | 7.03 | Does the taxon have a means of actively attaching itself to hard substrata (e.g. ship hulls, pilings, buoys) such that it enhances the likelihood of dispersal?              | No        | <a href="https://www.cabi.org/isc/datasheet/88207#tobiologyAndEcology">https://www.cabi.org/isc/datasheet/88207#tobiologyAndEcology</a>                           | Very high |
| 38                              | 7.04 | Is natural dispersal of the taxon likely to occur as eggs (for animals) or as propagules (for plants: seeds, spores) in the RA area?                                         | No        | <a href="https://www.cabi.org/isc/datasheet/88207#tobiologyAndEcology">https://www.cabi.org/isc/datasheet/88207#tobiologyAndEcology</a>                           | High      |
| 39                              | 7.05 | Is natural dispersal of the taxon likely to occur as larvae/juveniles (for animals) or as fragments/seedlings (for plants) in the RA area?                                   | Yes       | <a href="https://www.cabi.org/isc/datasheet/88207#tobiologyAndEcology">https://www.cabi.org/isc/datasheet/88207#tobiologyAndEcology</a>                           | High      |
| 40                              | 7.06 | Are older life stages of the taxon likely to migrate in the RA area for reproduction?                                                                                        | Yes       | <a href="https://www.cabi.org/isc/datasheet/88207#tobiologyAndEcology">https://www.cabi.org/isc/datasheet/88207#tobiologyAndEcology</a>                           | Very high |
| 41                              | 7.07 | Are propagules or eggs of the taxon likely to be dispersed in the RA area by other animals?                                                                                  | No        | <a href="https://www.cabi.org/isc/datasheet/88207#tobiologyAndEcology">https://www.cabi.org/isc/datasheet/88207#tobiologyAndEcology</a>                           | Very high |
| 42                              | 7.08 | Is dispersal of the taxon along any of the vectors/pathways mentioned in the previous seven questions (35–41; i.e. both unintentional or intentional) likely to be           | No        | <a href="https://www.cabi.org/isc/datasheet/88207#toriskAndImpactFactors">https://www.cabi.org/isc/datasheet/88207#toriskAndImpactFactors</a>                     | High      |
| 43                              | 7.09 | Is dispersal of the taxon density dependent?                                                                                                                                 | Yes       | <a href="https://www.cabi.org/isc/datasheet/88207#tobiologyAndEcology">https://www.cabi.org/isc/datasheet/88207#tobiologyAndEcology</a>                           | Very high |
| <b>8. Tolerance attributes</b>  |      |                                                                                                                                                                              |           |                                                                                                                                                                   |           |
| 44                              | 8.01 | Is the taxon able to withstand being out of water for extended periods (e.g. minimum of one or more hours) at some stage of its life cycle?                                  | No        | <a href="https://www.cabi.org/isc/datasheet/88207#tobiologyAndEcology">https://www.cabi.org/isc/datasheet/88207#tobiologyAndEcology</a>                           | Very high |
| 45                              | 8.02 | Is the taxon tolerant of a wide range of water quality conditions relevant to that taxon? [In the Justification field, indicate the relevant water quality variable(s) being | No        | <a href="https://www.cabi.org/isc/datasheet/88207#topreventionAndControl">https://www.cabi.org/isc/datasheet/88207#topreventionAndControl</a>                     | High      |
| 46                              | 8.03 | Can the taxon be controlled or eradicated in the wild with chemical, biological, or other agents/means?                                                                      | No        | <a href="https://www.cabi.org/isc/datasheet/88207#topreventionAndControl">https://www.cabi.org/isc/datasheet/88207#topreventionAndControl</a>                     | High      |
| 47                              | 8.04 | Is the taxon likely to tolerate or benefit from environmental/human disturbance?                                                                                             | Yes       | <a href="https://www.cabi.org/isc/datasheet/88207#toriskAndImpactFactors">https://www.cabi.org/isc/datasheet/88207#toriskAndImpactFactors</a>                     | High      |
| 48                              | 8.05 | Is the taxon able to tolerate salinity levels that are higher or lower than those found in its usual environment?                                                            | Yes       | <a href="https://www.cabi.org/isc/datasheet/88207#tobiologyAndEcology">https://www.cabi.org/isc/datasheet/88207#tobiologyAndEcology</a>                           | High      |
| 49                              | 8.06 | Are there effective natural enemies (predators) of the taxon present in the RA                                                                                               | Yes       | <a href="https://www.cabi.org/isc/datasheet/88207#tonotesOnNaturalEnemies">https://www.cabi.org/isc/datasheet/88207#tonotesOnNaturalEnemies</a>                   | High      |
| <b>C. Climate change</b>        |      |                                                                                                                                                                              |           |                                                                                                                                                                   |           |
| <b>9. Climate change</b>        |      |                                                                                                                                                                              |           |                                                                                                                                                                   |           |
| 50                              | 9.01 | Under the predicted future climatic conditions, are the risks of entry into the RA area posed by the taxon likely to increase, decrease or not change?                       | No change | <a href="https://www.cabi.org/isc/datasheet/88207#tonotesOnNaturalEnemies">https://www.cabi.org/isc/datasheet/88207#tonotesOnNaturalEnemies</a>                   | Very high |
| 51                              | 9.02 | Under the predicted future climatic conditions, are the risks of establishment posed by the taxon likely to increase, decrease or not change?                                | Decrease  | <a href="https://www.cabi.org/isc/datasheet/88207#topreventionAndControl">https://www.cabi.org/isc/datasheet/88207#topreventionAndControl</a>                     | Medium    |
| 52                              | 9.03 | Under the predicted future climatic conditions, are the risks of dispersal within the RA area posed by the taxon likely to increase, decrease or not change?                 | No change | <a href="https://www.cabi.org/isc/datasheet/88207#topreventionAndControl">https://www.cabi.org/isc/datasheet/88207#topreventionAndControl</a>                     | Medium    |

|    |      |                                                                                                                                                              |       |                                                                                                                                               |      |
|----|------|--------------------------------------------------------------------------------------------------------------------------------------------------------------|-------|-----------------------------------------------------------------------------------------------------------------------------------------------|------|
| 53 | 9.04 | Under the predicted future climatic conditions, what is the likely magnitude of future potential impacts on biodiversity and/or ecological integrity/status? | Lower | <a href="https://www.cabi.org/isc/datasheet/88207#topreventionAndControl">https://www.cabi.org/isc/datasheet/88207#topreventionAndControl</a> | High |
| 54 | 9.05 | Under the predicted future climatic conditions, what is the likely magnitude of future potential impacts on ecosystem structure and/or function?             | Lower | <a href="https://www.cabi.org/isc/datasheet/88207#topreventionAndControl">https://www.cabi.org/isc/datasheet/88207#topreventionAndControl</a> | High |
| 55 | 9.06 | Under the predicted future climatic conditions, what is the likely magnitude of future potential impacts on ecosystem services/socio-economic factors?       | Lower | <a href="https://www.cabi.org/isc/datasheet/88207#topreventionAndControl">https://www.cabi.org/isc/datasheet/88207#topreventionAndControl</a> | High |

| Statistics                                     |             |
|------------------------------------------------|-------------|
| Scores                                         |             |
| <b>BRA</b>                                     | <b>28.5</b> |
| <b>BRA Outcome</b>                             | <b>-</b>    |
| <b>BRA+CCA</b>                                 | <b>20.5</b> |
| <b>BRA+CCA Outcome</b>                         | <b>-</b>    |
| Score partition                                |             |
| <b>A. Biogeography/Historical</b>              | <b>11.5</b> |
| 1. Domestication/Cultivation                   | 4.0         |
| 2. Climate, distribution and introduction risk | 0.0         |
| 3. Invasive elsewhere                          | 7.5         |
| <b>B. Biology/Ecology</b>                      | <b>17.0</b> |
| 4. Undesirable (or persistence) traits         | 5.0         |
| 5. Resource exploitation                       | 7.0         |
| 6. Reproduction                                | 1.0         |
| 7. Dispersal mechanisms                        | 1.0         |
| 8. Tolerance attributes                        | 3.0         |
| <b>C. Climate change</b>                       | <b>-8.0</b> |
| 9. Climate change                              | -8.0        |
| Answered Questions                             |             |
| <b>Total</b>                                   | <b>55</b>   |
| <b>A. Biogeography/Historical</b>              | <b>13</b>   |
| 1. Domestication/Cultivation                   | 3           |
| 2. Climate, distribution and introduction risk | 5           |
| 3. Invasive elsewhere                          | 5           |
| <b>B. Biology/Ecology</b>                      | <b>36</b>   |
| 4. Undesirable (or persistence) traits         | 12          |
| 5. Resource exploitation                       | 2           |
| 6. Reproduction                                | 7           |
| 7. Dispersal mechanisms                        | 9           |
| 8. Tolerance attributes                        | 6           |
| <b>C. Climate change</b>                       | <b>6</b>    |
| 9. Climate change                              | 6           |
| Sectors affected                               |             |
| <b>Commercial</b>                              | <b>4</b>    |
| <b>Environmental</b>                           | <b>5</b>    |
| <b>Species or population nuisance traits</b>   | <b>13</b>   |

| Thresholds     |             |
|----------------|-------------|
| <b>BRA</b>     | <b>-</b>    |
| <b>BRA+CCA</b> | <b>-</b>    |
| Confidence     |             |
| <b>BRA+CCA</b> | <b>0.80</b> |
| <b>BRA</b>     | <b>0.82</b> |
| <b>CCA</b>     | <b>0.71</b> |

| Date and Time       |  |
|---------------------|--|
| 24/05/2021 17:15:19 |  |

## AS-ISK v2

| Taxon and Assessor details         |                                         |
|------------------------------------|-----------------------------------------|
| Category                           | Fishes and Lampreys (freshwater)        |
| Taxon name                         | <i>Coregonus albula</i>                 |
| Common name                        | vendace                                 |
| Assessor                           | Ivan Špelić                             |
| Risk screening context             |                                         |
| Reason and socio-economic benefits |                                         |
| Risk assessment area               | Danube & Adriatic basins BA, HR, ME, RS |
| Taxonomy                           |                                         |
| Native range                       |                                         |
| Introduced range                   |                                         |
| URL                                |                                         |

|                                                |      | Response                                                                                                                                                                | Justification (references and/or other information) | Confidence                                                                                                                                                                                                                                                                                                                           |           |
|------------------------------------------------|------|-------------------------------------------------------------------------------------------------------------------------------------------------------------------------|-----------------------------------------------------|--------------------------------------------------------------------------------------------------------------------------------------------------------------------------------------------------------------------------------------------------------------------------------------------------------------------------------------|-----------|
| A. Biogeography/Historical                     |      |                                                                                                                                                                         |                                                     |                                                                                                                                                                                                                                                                                                                                      |           |
| 1. Domestication/Cultivation                   |      |                                                                                                                                                                         |                                                     |                                                                                                                                                                                                                                                                                                                                      |           |
| 1                                              | 1.01 | Has the taxon been the subject of domestication (or cultivation) for at least 20 generations?                                                                           | Yes                                                 | Manikowska-Ślepowrońska, B., Szydzik, B. & Jakubas, D. Determinants of the presence of conflict bird and mammal species at pond fisheries in western Poland. <i>Aquat Ecol</i> 50, 87–95 (2016). <a href="https://doi.org/10.1007/s10452-015-9554-z">https://doi.org/10.1007/s10452-015-9554-z</a> . Farmed but no info on how long. | Medium    |
| 2                                              | 1.02 | Is the taxon harvested in the wild and likely to be sold or used in its live form?                                                                                      | Yes                                                 | Harvested for human consumption, can be used for biological control and stocking (CABI 2019).                                                                                                                                                                                                                                        | Medium    |
| 3                                              | 1.03 | Does the taxon have invasive races, varieties, sub-taxa or congeners?                                                                                                   | No                                                  | Coregonidae species are widely introduced but not quite invasive.                                                                                                                                                                                                                                                                    | High      |
| 2. Climate, distribution and introduction risk |      |                                                                                                                                                                         |                                                     |                                                                                                                                                                                                                                                                                                                                      |           |
| 4                                              | 2.01 | How similar are the climatic conditions of the Risk Assessment (RA) area and the taxon's native range?                                                                  | High                                                | Climatch 2020                                                                                                                                                                                                                                                                                                                        | Medium    |
| 5                                              | 2.02 | What is the quality of the climate matching data?                                                                                                                       | Medium                                              | Climatch 2020                                                                                                                                                                                                                                                                                                                        | High      |
| 6                                              | 2.03 | Is the taxon already present outside of captivity in the RA area?                                                                                                       | No                                                  | Froese, R. and D. Pauly. Editors. 2021. FishBase. World Wide Web electronic publication. <a href="http://www.fishbase.org">www.fishbase.org</a> , ( 02/2021 )                                                                                                                                                                        | Very high |
| 7                                              | 2.04 | How many potential vectors could the taxon use to enter in the RA area?                                                                                                 | One                                                 | Intentional introduction for angling or aquaculture (CABI 2019).                                                                                                                                                                                                                                                                     | Low       |
| 8                                              | 2.05 | Is the taxon currently found in close proximity to, and likely to enter into, the RA area in the near future (e.g. unintentional and intentional introductions)?        | Yes                                                 | Hungary (not established) (Froese & Pauly 2020).                                                                                                                                                                                                                                                                                     | Low       |
| 3. Invasive elsewhere                          |      |                                                                                                                                                                         |                                                     |                                                                                                                                                                                                                                                                                                                                      |           |
| 9                                              | 3.01 | Has the taxon become naturalised (established viable populations) outside its                                                                                           | Yes                                                 | Froese & Pauly 2020                                                                                                                                                                                                                                                                                                                  | Very high |
| 10                                             | 3.02 | In the taxon's introduced range, are there known adverse impacts to wild stocks or commercial taxa?                                                                     | Yes                                                 | U.S. Fish and Wildlife Service (2012): Vendace ( <i>Coregonus albula</i> ) Ecological Risk Screening Summary. Revised, September 2014 and July 2015                                                                                                                                                                                  | Very high |
| 11                                             | 3.03 | In the taxon's introduced range, are there known adverse impacts to aquaculture?                                                                                        | No                                                  | Used in experimental aquaculture, no documented adverse impacts (U.S. Fish and Wildlife Service (2012): Vendace ( <i>Coregonus albula</i> ) Ecological Risk Screening Summary. Revised, September 2014 and July 2015).                                                                                                               | High      |
| 12                                             | 3.04 | In the taxon's introduced range, are there known adverse impacts to ecosystem services?                                                                                 | Yes                                                 | Being an effective zooplanktivore, vendace may heavily reduce the zooplankton stock, in turn leading to reduced algal grazing by zooplankton (trophic cascade). This may aid eutrophication of the lake (CABI 2019).                                                                                                                 | Medium    |
| 13                                             | 3.05 | In the taxon's introduced range, are there known adverse socio-economic impacts?                                                                                        | No                                                  | Except for effects related to fisheries and sport fishing, where employment can be created in rural areas, there are no obvious social impacts of vendace invasions (CABI 2019).                                                                                                                                                     | High      |
| B. Biology/Ecology                             |      |                                                                                                                                                                         |                                                     |                                                                                                                                                                                                                                                                                                                                      |           |
| 4. Undesirable (or persistence) traits         |      |                                                                                                                                                                         |                                                     |                                                                                                                                                                                                                                                                                                                                      |           |
| 14                                             | 4.01 | Is it likely that the taxon will be poisonous or pose other risks to human health?                                                                                      | No                                                  | Harmless (Froese & Pauly 2020).                                                                                                                                                                                                                                                                                                      | Very high |
| 15                                             | 4.02 | Is it likely that the taxon will smother one or more native taxa (that are not threatened or protected)?                                                                | Yes                                                 | Depletion of zooplankton and impact on native planktivorous species (U.S. Fish and Wildlife Service (2012): Vendace ( <i>Coregonus albula</i> ) Ecological Risk Screening Summary. Revised, September 2014 and July 2015).                                                                                                           | High      |
| 16                                             | 4.03 | Are there any threatened or protected taxa that the non-native taxon would parasitise in the RA area?                                                                   | No                                                  | No parasitic behaviour.                                                                                                                                                                                                                                                                                                              | Very high |
| 17                                             | 4.04 | Is the taxon adaptable in terms of climatic and other environmental conditions, thus enhancing its potential persistence if it has invaded or could invade the RA area? | No                                                  | Coldwater species that tolerates temperatures up to 22 degrees Celsius (CABI 2019).                                                                                                                                                                                                                                                  | High      |
| 18                                             | 4.05 | Is the taxon likely to disrupt food-web structure/function in aquatic ecosystems if it has invaded or is likely to invade the RA                                        | Yes                                                 | Can lead to trophic cascade due to depletion of zooplankton (CABI 2019).                                                                                                                                                                                                                                                             | Medium    |
| 19                                             | 4.06 | Is the taxon likely to exert adverse impacts on ecosystem services in the RA area?                                                                                      | Yes                                                 | Increased eutrophication and abundance of algae (CABI 2019).                                                                                                                                                                                                                                                                         | Medium    |
| 20                                             | 4.07 | Is it likely that the taxon will host, and/or act as a vector for, recognised pests and infectious agents that are endemic in the RA                                    | Yes                                                 | U.S. Fish and Wildlife Service (2012): Vendace ( <i>Coregonus albula</i> ) Ecological Risk Screening Summary. Revised, September 2014 and July 2015                                                                                                                                                                                  | High      |
| 21                                             | 4.08 | Is it likely that the taxon will host, and/or act as a vector for, recognised pests and infectious agents that are absent from (novel to) the RA area?                  | Yes                                                 | U.S. Fish and Wildlife Service (2012): Vendace ( <i>Coregonus albula</i> ) Ecological Risk Screening Summary. Revised, September 2014 and July 2015                                                                                                                                                                                  | High      |
| 22                                             | 4.09 | Is it likely that the taxon will achieve a body size that will make it more likely to be released from captivity?                                                       | Yes                                                 | Maximum size 48 cm and 1 kg (Froese & Pauly 2020).                                                                                                                                                                                                                                                                                   | Very high |
| 23                                             | 4.10 | Is the taxon capable of sustaining itself in a range of water velocity conditions (e.g. versatile in habitat use)?                                                      | No                                                  | Lacustrine and marine in open water (Froese & Pauly 2020).                                                                                                                                                                                                                                                                           | High      |

|                                 |      |                                                                                                                                                                              |                |                                                                                                                                                                                                                                                       |           |
|---------------------------------|------|------------------------------------------------------------------------------------------------------------------------------------------------------------------------------|----------------|-------------------------------------------------------------------------------------------------------------------------------------------------------------------------------------------------------------------------------------------------------|-----------|
| 24                              | 4.11 | Is it likely that the taxon's mode of existence (e.g. excretion of by-products) or behaviours (e.g. feeding) will reduce habitat quality for native taxa?                    | Yes            | Depletion of zooplankton causes eutrophication (CABI 2019).                                                                                                                                                                                           | Medium    |
| 25                              | 4.12 | Is the taxon likely to maintain a viable population even when present in low densities (or persisting in adverse conditions by way of a dormant form)?                       | No             | Not documented in literature.                                                                                                                                                                                                                         | Low       |
| <b>5. Resource exploitation</b> |      |                                                                                                                                                                              |                |                                                                                                                                                                                                                                                       |           |
| 26                              | 5.01 | Is the taxon likely to consume threatened or protected native taxa in the RA area?                                                                                           | No             | Feeds on planktonic crustaceans (Froese & Pauly).                                                                                                                                                                                                     | High      |
| 27                              | 5.02 | Is the taxon likely to sequester food resources (including nutrients) to the detriment of native taxa in the RA area?                                                        | Not applicable | No data for calculation.                                                                                                                                                                                                                              | Very high |
| <b>6. Reproduction</b>          |      |                                                                                                                                                                              |                |                                                                                                                                                                                                                                                       |           |
| 28                              | 6.01 | Is the taxon likely to exhibit parental care and/or to reduce age-at-maturity in response to environmental conditions?                                                       | No             | Kottelat & Freyhof 2007                                                                                                                                                                                                                               | Very high |
| 29                              | 6.02 | Is the taxon likely to produce viable gametes or propagules (in the RA area)?                                                                                                | No             | Only established in northern Europe (CABI 2019, <a href="https://www.qbif.org/species/2351027">https://www.qbif.org/species/2351027</a> ).                                                                                                            | Medium    |
| 30                              | 6.03 | Is the taxon likely to hybridise naturally with native taxa?                                                                                                                 | No             | No related species in Croatia (Kottelat & Freyhof 2007).                                                                                                                                                                                              | Very high |
| 31                              | 6.04 | Is the taxon likely to be hermaphroditic or to display asexual reproduction?                                                                                                 | No             | Kottelat & Freyhof 2007.                                                                                                                                                                                                                              | Very high |
| 32                              | 6.05 | Is the taxon dependent on the presence of another taxon (or specific habitat features) to complete its life cycle?                                                           | No             | U.S. Fish and Wildlife Service (2012): Vendace ( <i>Coregonus albula</i> ) Ecological Risk Screening Summary. Revised, September 2014 and July 2015                                                                                                   | High      |
| 33                              | 6.06 | Is the taxon known (or likely) to produce a large number of propagules or offspring within a short time span (e.g. < 1 year)?                                                | Yes            | Froese & Pauly 2020                                                                                                                                                                                                                                   | High      |
| 34                              | 6.07 | How many time units (days, months, years) does the taxon require to reach the age-at-first-reproduction?                                                                     | 2              | Froese & Pauly 2020                                                                                                                                                                                                                                   | Very high |
| <b>7. Dispersal mechanisms</b>  |      |                                                                                                                                                                              |                |                                                                                                                                                                                                                                                       |           |
| 35                              | 7.01 | How many potential internal vectors/pathways could the taxon use to disperse within the RA area (with suitable protected areas (e.g. MCZ, MPA, SSSI)?                        | >1             | Intentional introductions, used as bait                                                                                                                                                                                                               | Medium    |
| 36                              | 7.02 | Will any of these vectors/pathways bring the taxon in close proximity to one or more protected areas (e.g. MCZ, MPA, SSSI)?                                                  | No             | Personal opinion.                                                                                                                                                                                                                                     | Low       |
| 37                              | 7.03 | Does the taxon have a means of actively attaching itself to hard substrata (e.g. ship hulls, pilings, buoys) such that it enhances the likelihood of dispersal?              | No             | No adaptations.                                                                                                                                                                                                                                       | Very high |
| 38                              | 7.04 | Is natural dispersal of the taxon likely to occur as eggs (for animals) or as propagules (for plants: seeds, spores) in the RA area?                                         | No             | Established only in northern Europe (CABI 2019), questionable natural reproduction in Croatia (personal opinion).                                                                                                                                     | Medium    |
| 39                              | 7.05 | Is natural dispersal of the taxon likely to occur as larvae/juveniles (for animals) or as fragments/seedlings (for plants) in the RA area?                                   | No             | Established only in northern Europe (CABI 2019), questionable natural reproduction in Croatia (personal opinion).                                                                                                                                     | Medium    |
| 40                              | 7.06 | Are older life stages of the taxon likely to migrate in the RA area for reproduction?                                                                                        | No             | There are spawning migrations in established populations, but no natural reproduction expected in Croatia (personal opinion).                                                                                                                         | Medium    |
| 41                              | 7.07 | Are propagules or eggs of the taxon likely to be dispersed in the RA area by other animals?                                                                                  | No             | Even where spawning eggs are deposited on gravel or sand 3-10 m deep (Froese & Pauly 2020).                                                                                                                                                           | High      |
| 42                              | 7.08 | Is dispersal of the taxon along any of the vectors/pathways mentioned in the previous seven questions (35-41; i.e. both unintentional or intentional) likely to be           | Yes            | Intentional introductions.                                                                                                                                                                                                                            | Very high |
| 43                              | 7.09 | Is dispersal of the taxon density dependent?                                                                                                                                 | No             | Not documented in literature.                                                                                                                                                                                                                         | Medium    |
| <b>8. Tolerance attributes</b>  |      |                                                                                                                                                                              |                |                                                                                                                                                                                                                                                       |           |
| 44                              | 8.01 | Is the taxon able to withstand being out of water for extended periods (e.g. minimum of one or more hours) at some stage of its life cycle?                                  | No             | Sensitive species, especially to low oxygen and high temperatures (CABI 2019).                                                                                                                                                                        | High      |
| 45                              | 8.02 | Is the taxon tolerant of a wide range of water quality conditions relevant to that taxon? [In the Justification field, indicate the relevant water quality variable(s) being | No             | CABI 2019                                                                                                                                                                                                                                             | Very high |
| 46                              | 8.03 | Can the taxon be controlled or eradicated in the wild with chemical, biological, or other agents/means?                                                                      | Not applicable | Not allowed in Croatia.                                                                                                                                                                                                                               | Very high |
| 47                              | 8.04 | Is the taxon likely to tolerate or benefit from environmental/human disturbance?                                                                                             | Yes            | If other water parameters are met (CABI 2019).                                                                                                                                                                                                        | High      |
| 48                              | 8.05 | Is the taxon able to tolerate salinity levels that are higher or lower than those found in its usual environment?                                                            | No             | Although it can tolerate brackish water with a relatively low salinity, natural spread between different watercourses is typically limited by the high salinity of estuary waters (CABI 2019).                                                        | High      |
| 49                              | 8.06 | Are there effective natural enemies (predators) of the taxon present in the RA area?                                                                                         | Yes            | Natural enemies of vendace are piscivorous fish, birds and mammals, typically those that are foraging in pelagic areas such as brown trout ( <i>Salmo trutta</i> ), loons ( <i>Gavidae</i> ) and cormorants ( <i>Phalacrocoracidae</i> ) (CABI 2019). | Very high |
| <b>C. Climate change</b>        |      |                                                                                                                                                                              |                |                                                                                                                                                                                                                                                       |           |
| <b>9. Climate change</b>        |      |                                                                                                                                                                              |                |                                                                                                                                                                                                                                                       |           |
| 50                              | 9.01 | Under the predicted future climatic conditions, are the risks of entry into the RA area posed by the taxon likely to increase, decrease or not change?                       | No change      | Only pathway is introduction by human.                                                                                                                                                                                                                | High      |

|    |      |                                                                                                                                                              |          |                                                                                                                                                                                                                                                                                                                                                                                                                                                                                                                          |      |
|----|------|--------------------------------------------------------------------------------------------------------------------------------------------------------------|----------|--------------------------------------------------------------------------------------------------------------------------------------------------------------------------------------------------------------------------------------------------------------------------------------------------------------------------------------------------------------------------------------------------------------------------------------------------------------------------------------------------------------------------|------|
| 51 | 9.02 | Under the predicted future climatic conditions, are the risks of establishment posed by the taxon likely to increase, decrease or not change?                | Decrease | Cold water species, tolerates water up to about 20 degrees Celsius (CABI 2019; COMTE, L., BUISSON, L., DAUFRESNE, M. and GRENOUILLET, G. (2013), Climate-induced changes in the distribution of freshwater fish: observed and predicted trends. <i>Freshwater Biology</i> , 58: 625-639.                                                                                                                                                                                                                                 | High |
| 52 | 9.03 | Under the predicted future climatic conditions, are the risks of dispersal within the RA area posed by the taxon likely to increase, decrease or not change? | Decrease | Cold water species, tolerates water up to about 20 degrees Celsius (CABI 2019; COMTE, L., BUISSON, L., DAUFRESNE, M. and GRENOUILLET, G. (2013), Climate-induced changes in the distribution of freshwater fish: observed and predicted trends. <i>Freshwater Biology</i> , 58: 625-639.                                                                                                                                                                                                                                 | High |
| 53 | 9.04 | Under the predicted future climatic conditions, what is the likely magnitude of future potential impacts on biodiversity and/or ecological integrity/status? | Lower    | Cold water species, tolerates water up to about 20 degrees Celsius (CABI 2019; COMTE, L., BUISSON, L., DAUFRESNE, M. and GRENOUILLET, G. (2013), Climate-induced changes in the distribution of freshwater fish: observed and predicted trends. <i>Freshwater Biology</i> , 58: 625-639. <a href="https://doi.org/10.1111/fwb.12081">https://doi.org/10.1111/fwb.12081</a> ). Unsuitable habitats will cause stress and decrease food ingestion that represents most                                                     | High |
| 54 | 9.05 | Under the predicted future climatic conditions, what is the likely magnitude of future potential impacts on ecosystem structure and/or function?             | Lower    | Cold water species, tolerates water up to about 20 degrees Celsius (CABI 2019; COMTE, L., BUISSON, L., DAUFRESNE, M. and GRENOUILLET, G. (2013), Climate-induced changes in the distribution of freshwater fish: observed and predicted trends. <i>Freshwater Biology</i> , 58: 625-639. <a href="https://doi.org/10.1111/fwb.12081">https://doi.org/10.1111/fwb.12081</a> ). Unsuitable habitats will cause stress and decrease food ingestion that represents most                                                     | High |
| 55 | 9.06 | Under the predicted future climatic conditions, what is the likely magnitude of future potential impacts on ecosystem services/socio-economic factors?       | Lower    | Cold water species, tolerates water up to about 20 degrees Celsius (CABI 2019; COMTE, L., BUISSON, L., DAUFRESNE, M. and GRENOUILLET, G. (2013), Climate-induced changes in the distribution of freshwater fish: observed and predicted trends. <i>Freshwater Biology</i> , 58: 625-639. <a href="https://doi.org/10.1111/fwb.12081">https://doi.org/10.1111/fwb.12081</a> ). Unsuitable habitats will cause stress and decrease food ingestion that represents most adverse impact and it is leading to eutrophication. | High |

| Statistics                                     |       |
|------------------------------------------------|-------|
| Scores                                         |       |
| BRA                                            | 15.0  |
| BRA Outcome                                    | -     |
| BRA+CCA                                        | 5.0   |
| BRA+CCA Outcome                                | -     |
| Score partition                                |       |
| A. Biogeography/Historical                     | 12.0  |
| 1. Domestication/Cultivation                   | 2.0   |
| 2. Climate, distribution and introduction risk | 0.0   |
| 3. Invasive elsewhere                          | 10.0  |
| B. Biology/Ecology                             | 3.0   |
| 4. Undesirable (or persistence) traits         | 6.0   |
| 5. Resource exploitation                       | 0.0   |
| 6. Reproduction                                | 0.0   |
| 7. Dispersal mechanisms                        | -3.0  |
| 8. Tolerance attributes                        | 0.0   |
| C. Climate change                              | -10.0 |
| 9. Climate change                              | -10.0 |
| Answered Questions                             |       |
| Total                                          | 55    |
| A. Biogeography/Historical                     | 13    |
| 1. Domestication/Cultivation                   | 3     |
| 2. Climate, distribution and introduction risk | 5     |
| 3. Invasive elsewhere                          | 5     |
| B. Biology/Ecology                             | 36    |
| 4. Undesirable (or persistence) traits         | 12    |
| 5. Resource exploitation                       | 2     |
| 6. Reproduction                                | 7     |
| 7. Dispersal mechanisms                        | 9     |
| 8. Tolerance attributes                        | 6     |
| C. Climate change                              | 6     |
| 9. Climate change                              | 6     |
| Sectors affected                               |       |
| Commercial                                     | 7     |
| Environmental                                  | 3     |
| Species or population nuisance traits          | -3    |

| Thresholds |      |
|------------|------|
| BRA        | -    |
| BRA+CCA    | -    |
| Confidence |      |
| BRA+CCA    | 0.73 |
| BRA        | 0.72 |
| CCA        | 0.75 |

| Date and Time       |  |
|---------------------|--|
| 19/05/2021 11:23:44 |  |

## AS-ISK v2

| Taxon and Assessor details         |                                         |
|------------------------------------|-----------------------------------------|
| Category                           | Fishes and Lampreys (freshwater)        |
| Taxon name                         | <i>Coregonus albula</i>                 |
| Common name                        | vendace                                 |
| Assessor                           | Tamara Kanjuh                           |
| Risk screening context             |                                         |
| Reason and socio-economic benefits |                                         |
| Risk assessment area               | Danube & Adriatic basins BA, HR, ME, RS |
| Taxonomy                           |                                         |
| Native range                       |                                         |
| Introduced range                   |                                         |
| URL                                |                                         |

|                                                |      | Response                                                                                                                                                                | Justification (references and/or other information)           | Confidence |
|------------------------------------------------|------|-------------------------------------------------------------------------------------------------------------------------------------------------------------------------|---------------------------------------------------------------|------------|
| A. Biogeography / Historical                   |      |                                                                                                                                                                         |                                                               |            |
| 1. Domestication/Cultivation                   |      |                                                                                                                                                                         |                                                               |            |
| 1                                              | 1.01 | Has the taxon been the subject of domestication (or cultivation) for at least 20 generations?                                                                           | Yes cabi.org                                                  | High       |
| 2                                              | 1.02 | Is the taxon harvested in the wild and likely to be sold or used in its live form?                                                                                      | Yes cabi.org                                                  | High       |
| 3                                              | 1.03 | Does the taxon have invasive races, varieties, sub-taxa or congeners?                                                                                                   | Yes cabi.org                                                  | High       |
| 2. Climate, distribution and introduction risk |      |                                                                                                                                                                         |                                                               |            |
| 4                                              | 2.01 | How similar are the climatic conditions of the Risk Assessment (RA) area and the taxon's native range?                                                                  | Medium Dfa, Dfb (Köppen-Geiger climate classification system) | High       |
| 5                                              | 2.02 | What is the quality of the climate matching data?                                                                                                                       | High Köppen-Geiger climate classification system              | High       |
| 6                                              | 2.03 | Is the taxon already present outside of captivity in the RA area?                                                                                                       | Yes Document?                                                 | High       |
| 7                                              | 2.04 | How many potential vectors could the taxon use to enter in the RA area?                                                                                                 | One Intentional stocking.                                     | High       |
| 8                                              | 2.05 | Is the taxon currently found in close proximity to, and likely to enter into, the RA area in the near future (e.g. unintentional and intentional introductions)?        | Yes Intentional stocking.                                     | High       |
| 3. Invasive elsewhere                          |      |                                                                                                                                                                         |                                                               |            |
| 9                                              | 3.01 | Has the taxon become naturalised (established viable populations) outside its introduced range?                                                                         | Yes cabi.org                                                  | High       |
| 10                                             | 3.02 | In the taxon's introduced range, are there known adverse impacts to wild stocks or commercial taxa?                                                                     | Yes cabi.org                                                  | High       |
| 11                                             | 3.03 | In the taxon's introduced range, are there known adverse impacts to aquaculture?                                                                                        | No cabi.org                                                   | High       |
| 12                                             | 3.04 | In the taxon's introduced range, are there known adverse impacts to ecosystem?                                                                                          | Yes cabi.org                                                  | High       |
| 13                                             | 3.05 | In the taxon's introduced range, are there known adverse socio-economic impacts?                                                                                        | No cabi.org                                                   | High       |
| B. Biology / Ecology                           |      |                                                                                                                                                                         |                                                               |            |
| 4. Undesirable (or persistence) traits         |      |                                                                                                                                                                         |                                                               |            |
| 14                                             | 4.01 | Is it likely that the taxon will be poisonous or pose other risks to human health?                                                                                      | No Harmless (FishBase)                                        | High       |
| 15                                             | 4.02 | Is it likely that the taxon will smother one or more native taxa (that are not threatened or protected)?                                                                | Yes cabi.org                                                  | High       |
| 16                                             | 4.03 | Are there any threatened or protected taxa that the non-native taxon would parasitise in the RA area?                                                                   | No The taxon is not a parasite.                               | High       |
| 17                                             | 4.04 | Is the taxon adaptable in terms of climatic and other environmental conditions, thus enhancing its potential persistence if it has invaded or could invade the RA area? | Yes cabi.org                                                  | High       |
| 18                                             | 4.05 | Is the taxon likely to disrupt food-web structure/function in aquatic ecosystems if it has invaded or is likely to invade the RA area?                                  | Yes cabi.org                                                  | High       |
| 19                                             | 4.06 | Is the taxon likely to exert adverse impacts on ecosystem services in the RA area?                                                                                      | Yes cabi.org                                                  | High       |
| 20                                             | 4.07 | Is it likely that the taxon will host, and/or act as a vector for, recognised pests and infectious agents that are endemic in the RA area?                              | No cabi.org                                                   | High       |
| 21                                             | 4.08 | Is it likely that the taxon will host, and/or act as a vector for, recognised pests and infectious agents that are absent from (novel to) the RA area?                  | Yes cabi.org                                                  | High       |
| 22                                             | 4.09 | Is it likely that the taxon will achieve a body size that will make it more likely to be released from captivity?                                                       | No No information found.                                      | High       |
| 23                                             | 4.10 | Is the taxon capable of sustaining itself in a range of water velocity conditions (e.g. versatile in habitat use)?                                                      | Yes cabi.org                                                  | High       |
| 24                                             | 4.11 | Is it likely that the taxon's mode of existence (e.g. excretion of by-products) or behaviours (e.g. feeding) will reduce habitat quality for native taxa?               | Yes cabi.org                                                  | High       |
| 25                                             | 4.12 | Is the taxon likely to maintain a viable population even when present in low densities (or persisting in adverse conditions by way of a dormant form)?                  | Yes cabi.org                                                  | High       |

|                                 |      |                                                                                                                                                                              |           |                                                                     |        |
|---------------------------------|------|------------------------------------------------------------------------------------------------------------------------------------------------------------------------------|-----------|---------------------------------------------------------------------|--------|
| <b>5. Resource exploitation</b> |      |                                                                                                                                                                              |           |                                                                     |        |
| 26                              | 5.01 | Is the taxon likely to consume threatened or protected native taxa in the RA area?                                                                                           | Yes       | cabi.org                                                            | High   |
| 27                              | 5.02 | Is the taxon likely to sequester food resources (including nutrients) to the detriment of native taxa in the RA area?                                                        | Yes       | cabi.org                                                            | High   |
| <b>6. Reproduction</b>          |      |                                                                                                                                                                              |           |                                                                     |        |
| 28                              | 6.01 | Is the taxon likely to exhibit parental care and/or to reduce age-at-maturity in response to environmental conditions?                                                       | No        | No information found.                                               | Medium |
| 29                              | 6.02 | Is the taxon likely to produce viable gametes or propagules (in the RA area)?                                                                                                | Yes       | cabi.org                                                            | High   |
| 30                              | 6.03 | Is the taxon likely to hybridise naturally with native taxa?                                                                                                                 | Yes       | cabi.org                                                            | Medium |
| 31                              | 6.04 | Is the taxon likely to be hermaphroditic or to display asexual reproduction?                                                                                                 | No        | cabi.org                                                            | High   |
| 32                              | 6.05 | Is the taxon dependent on the presence of another taxon (or specific habitat features) to complete its life cycle?                                                           | No        | cabi.org                                                            | High   |
| 33                              | 6.06 | Is the taxon known (or likely) to produce a large number of propagules or offspring within a short time span (e.g. < 1 year)?                                                | Yes       | cabi.org                                                            | High   |
| 34                              | 6.07 | How many time units (days, months, years) does the taxon require to reach the age-at-first-reproduction?                                                                     | 2         | "Vendace: Coregonus albula (L.)". NatureGate. Retrieved 2013-12-18. | High   |
| <b>7. Dispersal mechanisms</b>  |      |                                                                                                                                                                              |           |                                                                     |        |
| 35                              | 7.01 | How many potential internal vectors/pathways could the taxon use to disperse within the RA area (with suitable vectors/pathways)?                                            | One       | Intentional stocking.                                               | High   |
| 36                              | 7.02 | Will any of these vectors/pathways bring the taxon in close proximity to one or more protected areas (e.g. MCZ, MPA, SSSI)?                                                  | Yes       | Intentional stocking.                                               | High   |
| 37                              | 7.03 | Does the taxon have a means of actively attaching itself to hard substrata (e.g. ship hulls, pilings, buoys) such that it enhances the likelihood of dispersal?              | No        | cabi.org                                                            | High   |
| 38                              | 7.04 | Is natural dispersal of the taxon likely to occur as eggs (for animals) or as propagules (for plants: seeds, spores) in the RA area?                                         | Yes       | cabi.org                                                            | High   |
| 39                              | 7.05 | Is natural dispersal of the taxon likely to occur as larvae/juveniles (for animals) or as fragments/seedlings (for plants) in the RA area?                                   | Yes       | cabi.org                                                            | High   |
| 40                              | 7.06 | Are older life stages of the taxon likely to migrate in the RA area for reproduction?                                                                                        | No        | cabi.org                                                            | Medium |
| 41                              | 7.07 | Are propagules or eggs of the taxon likely to be dispersed in the RA area by other animals?                                                                                  | No        | cabi.org                                                            | Medium |
| 42                              | 7.08 | Is dispersal of the taxon along any of the vectors/pathways mentioned in the previous seven questions (35–41; i.e. both unintentional or intentional) likely to be           | Yes       | Intentional stocking.                                               | High   |
| 43                              | 7.09 | Is dispersal of the taxon density dependent?                                                                                                                                 | No        | cabi.org                                                            | High   |
| <b>8. Tolerance attributes</b>  |      |                                                                                                                                                                              |           |                                                                     |        |
| 44                              | 8.01 | Is the taxon able to withstand being out of water for extended periods (e.g. minimum of one or more hours) at some stage of its life cycle?                                  | No        | cabi.org                                                            | High   |
| 45                              | 8.02 | Is the taxon tolerant of a wide range of water quality conditions relevant to that taxon? [In the Justification field, indicate the relevant water quality variable(s) being | Yes       | cabi.org                                                            | High   |
| 46                              | 8.03 | Can the taxon be controlled or eradicated in the wild with chemical, biological, or other agents/means?                                                                      | Yes       | cabi.org                                                            | High   |
| 47                              | 8.04 | Is the taxon likely to tolerate or benefit from environmental/human disturbance?                                                                                             | Yes       | cabi.org                                                            | High   |
| 48                              | 8.05 | Is the taxon able to tolerate salinity levels that are higher or lower than those found in its usual environment?                                                            | Yes       | cabi.org                                                            | High   |
| 49                              | 8.06 | Are there effective natural enemies (predators) of the taxon present in the RA                                                                                               | Yes       | cabi.org                                                            | High   |
| <b>C. Climate change</b>        |      |                                                                                                                                                                              |           |                                                                     |        |
| <b>9. Climate change</b>        |      |                                                                                                                                                                              |           |                                                                     |        |
| 50                              | 9.01 | Under the predicted future climatic conditions, are the risks of entry into the RA area posed by the taxon likely to increase, decrease or not change?                       | No change | Highly adaptable to different environments.                         | High   |
| 51                              | 9.02 | Under the predicted future climatic conditions, are the risks of establishment posed by the taxon likely to increase, decrease or not change?                                | No change | Highly adaptable to different environments.                         | Medium |
| 52                              | 9.03 | Under the predicted future climatic conditions, are the risks of dispersal within the RA area posed by the taxon likely to increase, decrease or not change?                 | No change | Highly adaptable to different environments.                         | Medium |
| 53                              | 9.04 | Under the predicted future climatic conditions, what is the likely magnitude of future potential impacts on biodiversity and/or ecological integrity/status?                 | No change | Highly adaptable to different environments.                         | Medium |



|    |      |                                                                                                                                                        |           |                                             |        |
|----|------|--------------------------------------------------------------------------------------------------------------------------------------------------------|-----------|---------------------------------------------|--------|
| 54 | 9.05 | Under the predicted future climatic conditions, what is the likely magnitude of future potential impacts on ecosystem structure and/or function?       | No change | Highly adaptable to different environments. | Medium |
| 55 | 9.06 | Under the predicted future climatic conditions, what is the likely magnitude of future potential impacts on ecosystem services/socio-economic factors? | No change | Highly adaptable to different environments. | Medium |

| Statistics                                     |             |
|------------------------------------------------|-------------|
| Scores                                         |             |
| <b>BRA</b>                                     | <b>32.0</b> |
| <b>BRA Outcome</b>                             | <b>-</b>    |
| <b>BRA+CCA</b>                                 | <b>32.0</b> |
| <b>BRA+CCA Outcome</b>                         | <b>-</b>    |
| Score partition                                |             |
| <b>A. Biogeography/Historical</b>              | <b>10.0</b> |
| 1. Domestication/Cultivation                   | 4.0         |
| 2. Climate, distribution and introduction risk | 1.0         |
| 3. Invasive elsewhere                          | 5.0         |
| <b>B. Biology/Ecology</b>                      | <b>22.0</b> |
| 4. Undesirable (or persistence) traits         | 8.0         |
| 5. Resource exploitation                       | 7.0         |
| 6. Reproduction                                | 3.0         |
| 7. Dispersal mechanisms                        | 1.0         |
| 8. Tolerance attributes                        | 3.0         |
| <b>C. Climate change</b>                       | <b>0.0</b>  |
| 9. Climate change                              | 0.0         |
| Answered Questions                             |             |
| <b>Total</b>                                   | <b>55</b>   |
| <b>A. Biogeography/Historical</b>              | <b>13</b>   |
| 1. Domestication/Cultivation                   | 3           |
| 2. Climate, distribution and introduction risk | 5           |
| 3. Invasive elsewhere                          | 5           |
| <b>B. Biology/Ecology</b>                      | <b>36</b>   |
| 4. Undesirable (or persistence) traits         | 12          |
| 5. Resource exploitation                       | 2           |
| 6. Reproduction                                | 7           |
| 7. Dispersal mechanisms                        | 9           |
| 8. Tolerance attributes                        | 6           |
| <b>C. Climate change</b>                       | <b>6</b>    |
| 9. Climate change                              | 6           |
| Sectors affected                               |             |
| <b>Commercial</b>                              | <b>7</b>    |
| <b>Environmental</b>                           | <b>11</b>   |
| <b>Species or population nuisance traits</b>   | <b>17</b>   |

| Thresholds     |             |
|----------------|-------------|
| <b>BRA</b>     | <b>-</b>    |
| <b>BRA+CCA</b> | <b>-</b>    |
| Confidence     |             |
| <b>BRA+CCA</b> | <b>0.71</b> |
| <b>BRA</b>     | <b>0.73</b> |
| <b>CCA</b>     | <b>0.54</b> |

| Date and Time       |  |
|---------------------|--|
| 03/06/2021 14:45:25 |  |

## AS-ISK v2

| Taxon and Assessor details         |                                         |
|------------------------------------|-----------------------------------------|
| Category                           | Fishes and Lampreys (freshwater)        |
| Taxon name                         | <i>Coregonus albula</i>                 |
| Common name                        | vendace                                 |
| Assessor                           | Tena Radocaj                            |
| Risk screening context             |                                         |
| Reason and socio-economic benefits |                                         |
| Risk assessment area               | Danube & Adriatic basins BA, HR, ME, RS |
| Taxonomy                           |                                         |
| Native range                       |                                         |
| Introduced range                   |                                         |
| URL                                |                                         |

|                                                |      | Response                                                                                                                                                                | Justification (references and/or other information) | Confidence                                                                                                                                                                                                                                                                                                                                                                                                                     |           |
|------------------------------------------------|------|-------------------------------------------------------------------------------------------------------------------------------------------------------------------------|-----------------------------------------------------|--------------------------------------------------------------------------------------------------------------------------------------------------------------------------------------------------------------------------------------------------------------------------------------------------------------------------------------------------------------------------------------------------------------------------------|-----------|
| A. Biogeography/Historical                     |      |                                                                                                                                                                         |                                                     |                                                                                                                                                                                                                                                                                                                                                                                                                                |           |
| 1. Domestication/Cultivation                   |      |                                                                                                                                                                         |                                                     |                                                                                                                                                                                                                                                                                                                                                                                                                                |           |
| 1                                              | 1.01 | Has the taxon been the subject of domestication (or cultivation) for at least 20 generations?                                                                           | Yes                                                 | Manikowska-Słepowrońska, B., Szydzik, B. & Jakubas, D. Determinants of the presence of conflict bird and mammal species at pond fisheries in western Poland. Aquat Ecol 50, 87–95 (2016). <a href="https://doi.org/10.1007/s10452-015-9554-z">https://doi.org/10.1007/s10452-015-9554-z</a> . Farmed but no info on how long.                                                                                                  | Medium    |
| 2                                              | 1.02 | Is the taxon harvested in the wild and likely to be sold or used in its live form?                                                                                      | Yes                                                 | It is harvested for human consumption. (Freyhof, J. 2011. <i>Coregonus albula</i> . The IUCN Red List of Threatened Species 2011: e.T5360A97801719)                                                                                                                                                                                                                                                                            | Medium    |
| 3                                              | 1.03 | Does the taxon have invasive races, varieties, sub-taxa or congeners?                                                                                                   | No                                                  | no                                                                                                                                                                                                                                                                                                                                                                                                                             | Low       |
| 2. Climate, distribution and introduction risk |      |                                                                                                                                                                         |                                                     |                                                                                                                                                                                                                                                                                                                                                                                                                                |           |
| 4                                              | 2.01 | How similar are the climatic conditions of the Risk Assessment (RA) area and the taxon's native range?                                                                  | Medium                                              | The similarity between climatic conditions RA area and native range is medium. I use climatch.                                                                                                                                                                                                                                                                                                                                 | Medium    |
| 5                                              | 2.02 | What is the quality of the climate matching data?                                                                                                                       | Medium                                              | The quality of the climate matching data is medium.                                                                                                                                                                                                                                                                                                                                                                            | Medium    |
| 6                                              | 2.03 | Is the taxon already present outside of captivity in the RA area?                                                                                                       | No                                                  | Vendace is not present outside of captivity in the RA area.                                                                                                                                                                                                                                                                                                                                                                    | Very high |
| 7                                              | 2.04 | How many potential vectors could the taxon use to enter in the RA area?                                                                                                 | >1                                                  | Vendace can use >1 potential vectors to enter in the RA area; intentional: human impact, unintentional: natural spread via natural and manmade watercourses                                                                                                                                                                                                                                                                    | Medium    |
| 8                                              | 2.05 | Is the taxon currently found in close proximity to, and likely to enter into, the RA area in the near future (e.g. unintentional and intentional introductions)?        | No                                                  | The nearest area where the Vendace lives is Poland, I think in the near future the Vedanec won't be present in the RA area.                                                                                                                                                                                                                                                                                                    | Low       |
| 3. Invasive elsewhere                          |      |                                                                                                                                                                         |                                                     |                                                                                                                                                                                                                                                                                                                                                                                                                                |           |
| 9                                              | 3.01 | Has the taxon become naturalised (established viable populations) outside its native range?                                                                             | Yes                                                 | Præbel, K., Gjelland, K. Ø., Salonen, E., & Amundsen, P. A. (2013). Invasion genetics of vendace ( <i>Coregonus albula</i> (L.)) in the I nari-P asvik watercourse: revealing the origin and expansion pattern of a rapid colonization event. Ecology and evolution, 3(5), U.S. Fish and Wildlife Service (2012): Vendace ( <i>Coregonus albula</i> ) Ecological Risk Screening Summary. Revised, September 2014 and July 2015 | Medium    |
| 10                                             | 3.02 | In the taxon's introduced range, are there known adverse impacts to wild stocks or commercial taxa?                                                                     | Yes                                                 | Vendace no has adverse impacts on aquaculture.                                                                                                                                                                                                                                                                                                                                                                                 | Medium    |
| 11                                             | 3.03 | In the taxon's introduced range, are there known adverse impacts to aquaculture?                                                                                        | No                                                  | Vendace have been observed to reduce zooplankton diversity, resulting in smaller zooplankton species and smaller sizes of individual zooplankters (Bohn and Amundsen,1998; Amundsen et al., 2009). Being an effective zooplanktivore, vendace may heavily reduce the zooplankton stock, in turn leading to reduced algal grazing by zooplankton (trophic cascade). (CABI, 2019)                                                | Low       |
| 12                                             | 3.04 | In the taxon's introduced range, are there known adverse impacts to ecosystem services?                                                                                 | Yes                                                 | Except for effects related to fisheries and sport fishing, where employment can be created in rural areas, there are no obvious social impacts of vendace invasions (CABI 2019).                                                                                                                                                                                                                                               | Medium    |
| 13                                             | 3.05 | In the taxon's introduced range, are there known adverse socio-economic impacts?                                                                                        | No                                                  |                                                                                                                                                                                                                                                                                                                                                                                                                                | Low       |
| B. Biology/Ecology                             |      |                                                                                                                                                                         |                                                     |                                                                                                                                                                                                                                                                                                                                                                                                                                |           |
| 4. Undesirable (or persistence) traits         |      |                                                                                                                                                                         |                                                     |                                                                                                                                                                                                                                                                                                                                                                                                                                |           |
| 14                                             | 4.01 | Is it likely that the taxon will be poisonous or pose other risks to human health?                                                                                      | No                                                  | Harmless (Froese & Pauly 2020)                                                                                                                                                                                                                                                                                                                                                                                                 | Medium    |
| 15                                             | 4.02 | Is it likely that the taxon will smother one or more native taxa (that are not threatened or protected)?                                                                | Yes                                                 | Strong effects from the vendace planktivory have been reported as reduced zooplankton diversity, reduced individual zooplankter size, and reduced zooplankton densities. This has resulted in lowered zooplankton availability for planktivorous fish, and to a large extent displaced native planktivores from the pelagic fish communities through exploitative competition. (CABI, 2019)                                    | Low       |
| 16                                             | 4.03 | Are there any threatened or protected taxa that the non-native taxon would parasitise in the RA area?                                                                   | No                                                  | No                                                                                                                                                                                                                                                                                                                                                                                                                             | Low       |
| 17                                             | 4.04 | Is the taxon adaptable in terms of climatic and other environmental conditions, thus enhancing its potential persistence if it has invaded or could invade the RA area? | No                                                  | Coldwater species that tolerates temperatures up to 22 degrees Celsius (CABI 2019).                                                                                                                                                                                                                                                                                                                                            | Medium    |
| 18                                             | 4.05 | Is the taxon likely to disrupt food-web structure/function in aquatic ecosystems if it has invaded or is likely to invade the RA area?                                  | Yes                                                 | Vendace maybe will disrupt food-web structure in the RA area. The presence of Vendace may result in a reduced availability of zooplankton for planktivorous fish and may adversely impact populations of native planktivore fish                                                                                                                                                                                               | Low       |
| 19                                             | 4.06 | Is the taxon likely to exert adverse impacts on ecosystem services in the RA area?                                                                                      | Yes                                                 | Vendace maybe will have a negative impact on the economic outcome of fisheries for other species that could be negatively affected by the vendace invasion.                                                                                                                                                                                                                                                                    | Low       |
| 20                                             | 4.07 | Is it likely that the taxon will host, and/or act as a vector for, recognised pests and infectious agents that are endemic in the RA                                    | Yes                                                 | Yes, the taxon may be a host or vector of known pests and infectious agents endemic to RA area. Because in every area exist infectious agents and pests.                                                                                                                                                                                                                                                                       | Low       |

|                                 |      |                                                                                                                                                                              |                |                                                                                                                                                                                                                                       |           |
|---------------------------------|------|------------------------------------------------------------------------------------------------------------------------------------------------------------------------------|----------------|---------------------------------------------------------------------------------------------------------------------------------------------------------------------------------------------------------------------------------------|-----------|
| 21                              | 4.08 | Is it likely that the taxon will host, and/or act as a vector for, recognised pests and infectious agents that are absent from (novel to) the RA area?                       | Yes            | It is possible, each fish can host or vector the disease, as such it can introduce the disease into the area where it occurs.                                                                                                         | Low       |
| 22                              | 4.09 | Is it likely that the taxon will achieve a body size that will make it more likely to be released from captivity?                                                            | Yes            | Max length : 48.0 cm TL (Fishbase)                                                                                                                                                                                                    | Medium    |
| 23                              | 4.10 | Is the taxon capable of sustaining itself in a range of water velocity conditions (e.g. versatile in habitat use)?                                                           | No             | Lacustrine and marine in open water (Froese & Pauly 2020).                                                                                                                                                                            | Low       |
| 24                              | 4.11 | Is it likely that the taxon's mode of existence (e.g. excretion of by-products) or behaviours (e.g. feeding) will reduce habitat quality for native taxa?                    | Yes            | Depletion of zooplankton causes eutrophication (CABI 2019).                                                                                                                                                                           | Medium    |
| 25                              | 4.12 | Is the taxon likely to maintain a viable population even when present in low densities (or persisting in adverse conditions by way of a dormant form)?                       | No             | Introduction to one area with low number of specimens wasn't succesful                                                                                                                                                                | Low       |
| <b>5. Resource exploitation</b> |      |                                                                                                                                                                              |                |                                                                                                                                                                                                                                       |           |
| 26                              | 5.01 | Is the taxon likely to consume threatened or protected native taxa in the RA area?                                                                                           | No             | Vendace not consume threatened of protected native taxa in the RA area.                                                                                                                                                               | Low       |
| 27                              | 5.02 | Is the taxon likely to sequester food resources (including nutrients) to the detriment of native taxa in the RA area?                                                        | Not applicable | not applicable                                                                                                                                                                                                                        | Very high |
| <b>6. Reproduction</b>          |      |                                                                                                                                                                              |                |                                                                                                                                                                                                                                       |           |
| 28                              | 6.01 | Is the taxon likely to exhibit parental care and/or to reduce age-at-maturity in response to environmental conditions?                                                       | No             | Kottelat & Freyhof 2007                                                                                                                                                                                                               | Low       |
| 29                              | 6.02 | Is the taxon likely to produce viable gametes or propagules (in the RA area)?                                                                                                | No             | Only established in northern Europe (CABI 2019)                                                                                                                                                                                       | Medium    |
| 30                              | 6.03 | Is the taxon likely to hybridise naturally with native taxa?                                                                                                                 | No             | no                                                                                                                                                                                                                                    | Low       |
| 31                              | 6.04 | Is the taxon likely to be hermaphroditic or to display asexual reproduction?                                                                                                 | No             | no                                                                                                                                                                                                                                    | Low       |
| 32                              | 6.05 | Is the taxon dependent on the presence of another taxon (or specific habitat features) to complete its life cycle?                                                           | No             | no                                                                                                                                                                                                                                    | Low       |
| 33                              | 6.06 | Is the taxon known (or likely) to produce a large number of propagules or offspring within a short time span (e.g. < 1 year)?                                                | Yes            | Vendace have high fecundity and many small eggs (80-300 egg per gram body mass). (CABI 2019)                                                                                                                                          | Low       |
| 34                              | 6.07 | How many time units (days, months, years) does the taxon require to reach the age-at-first-reproduction?                                                                     | 2              | Spawns for the first time at 2-5 years (Freyhof, J. 2011. Coregonus albula. The IUCN Red List of Threatened Species 2011: e.T5360A97801719)                                                                                           | High      |
| <b>7. Dispersal mechanisms</b>  |      |                                                                                                                                                                              |                |                                                                                                                                                                                                                                       |           |
| 35                              | 7.01 | How many potential internal vectors/pathways could the taxon use to disperse within the RA area (with suitable vectors/pathways)?                                            | >1             | 1. accidental introduction, 2. human-impact 3. natural spread via natural and manmade watercourses                                                                                                                                    | Medium    |
| 36                              | 7.02 | Will any of these vectors/pathways bring the taxon in close proximity to one or more protected areas (e.g. MCZ, MPA, SSSI)?                                                  | Yes            | All of these vectors/pathways can bring taxon in protected area.                                                                                                                                                                      | Medium    |
| 37                              | 7.03 | Does the taxon have a means of actively attaching itself to hard substrata (e.g. ship hulls, pilings, buoys) such that it enhances the likelihood of dispersal?              | No             | no                                                                                                                                                                                                                                    | Low       |
| 38                              | 7.04 | Is natural dispersal of the taxon likely to occur as eggs (for animals) or as propagules (for plants: seeds, spores) in the RA area?                                         | No             | Freyhof, J. 2011. Coregonus albula. The IUCN Red List of Threatened Species 2011: e.T5360A97801719                                                                                                                                    | Low       |
| 39                              | 7.05 | Is natural dispersal of the taxon likely to occur as larvae/juveniles (for animals) or as fragments/seedlings (for plants) in the RA area?                                   | No             | Freyhof, J. 2011. Coregonus albula. The IUCN Red List of Threatened Species 2011: e.T5360A97801719                                                                                                                                    | Low       |
| 40                              | 7.06 | Are older life stages of the taxon likely to migrate in the RA area for reproduction?                                                                                        | No             | no                                                                                                                                                                                                                                    | Low       |
| 41                              | 7.07 | Are propagules or eggs of the taxon likely to be dispersed in the RA area by other animals?                                                                                  | No             | No                                                                                                                                                                                                                                    | Low       |
| 42                              | 7.08 | Is dispersal of the taxon along any of the vectors/pathways mentioned in the previous seven questions (35-41; i.e. both unintentional or intentional) likely to be           | Yes            | There is a possibility of a high rate of spread of taxa. Eg. if a fertilized individual enters a new area by any means of expansion.                                                                                                  | Low       |
| 43                              | 7.09 | Is dispersal of the taxon density dependent?                                                                                                                                 | No             | Personal opinion                                                                                                                                                                                                                      | Low       |
| <b>8. Tolerance attributes</b>  |      |                                                                                                                                                                              |                |                                                                                                                                                                                                                                       |           |
| 44                              | 8.01 | Is the taxon able to withstand being out of water for extended periods (e.g. minimum of one or more hours) at some stage of its life cycle?                                  | No             | personal opinion                                                                                                                                                                                                                      | Low       |
| 45                              | 8.02 | Is the taxon tolerant of a wide range of water quality conditions relevant to that taxon? [In the Justification field, indicate the relevant water quality variable(s) being | No             | Sensitive                                                                                                                                                                                                                             | Medium    |
| 46                              | 8.03 | Can the taxon be controlled or eradicated in the wild with chemical, biological, or other agents/means?                                                                      | Not applicable | It is not regulated in Croatia                                                                                                                                                                                                        | Very high |
| 47                              | 8.04 | Is the taxon likely to tolerate or benefit from environmental/human disturbance?                                                                                             | Yes            | Dispersal downstream within a watercourse can be expected, even if the watercourse is regulated by dams. (CABI, 2019)                                                                                                                 | Low       |
| 48                              | 8.05 | Is the taxon able to tolerate salinity levels that are higher or lower than those found in its usual environment?                                                            | No             | Vendace is a freshwater fish species. Although it can tolerate brackish water with a relatively low salinity, natural spread between different watercourses is typically limited by the high salinity of estuary waters. (CABI, 2019) | Low       |
| 49                              | 8.06 | Are there effective natural enemies (predators) of the taxon present in the RA                                                                                               | Yes            | Silurus glanis, Northern pike, Brown trout                                                                                                                                                                                            | Medium    |
| <b>C. Climate change</b>        |      |                                                                                                                                                                              |                |                                                                                                                                                                                                                                       |           |

| 9. Climate change |      |                                                                                                                                                              |           |                                                                                                                                            |        |
|-------------------|------|--------------------------------------------------------------------------------------------------------------------------------------------------------------|-----------|--------------------------------------------------------------------------------------------------------------------------------------------|--------|
| 50                | 9.01 | Under the predicted future climatic conditions, are the risks of entry into the RA area posed by the taxon likely to increase, decrease or not change?       | No change | Only pathway is introduction by human                                                                                                      | Medium |
| 51                | 9.02 | Under the predicted future climatic conditions, are the risks of establishment posed by the taxon likely to increase, decrease or not change?                | Decrease  | Cold water species, tolerates water up to about 20 degrees Celsius (CABI 2019).                                                            | Low    |
| 52                | 9.03 | Under the predicted future climatic conditions, are the risks of dispersal within the RA area posed by the taxon likely to increase, decrease or not change? | Decrease  | Cold water species, tolerates water up to about 20 degrees Celsius (CABI 2019).                                                            | Low    |
| 53                | 9.04 | Under the predicted future climatic conditions, what is the likely magnitude of future potential impacts on biodiversity and/or ecological integrity/status? | Lower     | Unsuitable habitats will cause stress and decrease food ingestion that represents most adverse impact.                                     | Low    |
| 54                | 9.05 | Under the predicted future climatic conditions, what is the likely magnitude of future potential impacts on ecosystem structure and/or function?             | Lower     | Unsuitable habitats will cause stress and decrease food ingestion that represents most adverse impact.                                     | Low    |
| 55                | 9.06 | Under the predicted future climatic conditions, what is the likely magnitude of future potential impacts on ecosystem services/socio-economic factors?       | Lower     | Unsuitable habitats will cause stress and decrease food ingestion that represents most adverse impact and it is leading to eutrophication. | Low    |

| Statistics                                     |       |
|------------------------------------------------|-------|
| Scores                                         |       |
| BRA                                            | 14.5  |
| BRA Outcome                                    | -     |
| BRA+CCA                                        | 4.5   |
| BRA+CCA Outcome                                | -     |
| Score partition                                |       |
| A. Biogeography/Historical                     | 10.5  |
| 1. Domestication/Cultivation                   | 2.0   |
| 2. Climate, distribution and introduction risk | 1.0   |
| 3. Invasive elsewhere                          | 7.5   |
| B. Biology/Ecology                             | 4.0   |
| 4. Undesirable (or persistence) traits         | 6.0   |
| 5. Resource exploitation                       | 0.0   |
| 6. Reproduction                                | 0.0   |
| 7. Dispersal mechanisms                        | -2.0  |
| 8. Tolerance attributes                        | 0.0   |
| C. Climate change                              | -10.0 |
| 9. Climate change                              | -10.0 |
| Answered Questions                             |       |
| Total                                          | 55    |
| A. Biogeography/Historical                     | 13    |
| 1. Domestication/Cultivation                   | 3     |
| 2. Climate, distribution and introduction risk | 5     |
| 3. Invasive elsewhere                          | 5     |
| B. Biology/Ecology                             | 36    |
| 4. Undesirable (or persistence) traits         | 12    |
| 5. Resource exploitation                       | 2     |
| 6. Reproduction                                | 7     |
| 7. Dispersal mechanisms                        | 9     |
| 8. Tolerance attributes                        | 6     |
| C. Climate change                              | 6     |
| 9. Climate change                              | 6     |
| Sectors affected                               |       |
| Commercial                                     | 7     |
| Environmental                                  | 3     |
| Species or population nuisance traits          | -2    |

| Thresholds |      |
|------------|------|
| BRA        | -    |
| BRA+CCA    | -    |
| Confidence |      |
| BRA+CCA    | 0.38 |
| BRA        | 0.39 |
| CCA        | 0.29 |

| Date and Time       |
|---------------------|
| 08/05/2020 07:53:26 |

## AS-ISK v2

| Taxon and Assessor details         |                                         |
|------------------------------------|-----------------------------------------|
| Category                           | Fishes and Lampreys (freshwater)        |
| Taxon name                         | <i>Coregonus lavaretus</i>              |
| Common name                        | European whitefish                      |
| Assessor                           | Ana Marić                               |
| Risk screening context             |                                         |
| Reason and socio-economic benefits |                                         |
| Risk assessment area               | Danube & Adriatic basins BA, HR, ME, RS |
| Taxonomy                           |                                         |
| Native range                       |                                         |
| Introduced range                   |                                         |
| URL                                |                                         |

|                                                |      | Response                                                                                                                                                                | Justification (references and/or other information) | Confidence                                                                                                                                                                                                                                                                                                                                                                                                                                                                       |           |
|------------------------------------------------|------|-------------------------------------------------------------------------------------------------------------------------------------------------------------------------|-----------------------------------------------------|----------------------------------------------------------------------------------------------------------------------------------------------------------------------------------------------------------------------------------------------------------------------------------------------------------------------------------------------------------------------------------------------------------------------------------------------------------------------------------|-----------|
| A. Biogeography/ Historical                    |      |                                                                                                                                                                         |                                                     |                                                                                                                                                                                                                                                                                                                                                                                                                                                                                  |           |
| 1. Domestication/Cultivation                   |      |                                                                                                                                                                         |                                                     |                                                                                                                                                                                                                                                                                                                                                                                                                                                                                  |           |
| 1                                              | 1.01 | Has the taxon been the subject of domestication (or cultivation) for at least 20 generations?                                                                           | Yes                                                 | Effect of eye fluke infection on the growth of whitefish ( <i>Coregonus lavaretus</i> ) —An experimental approach Author links open overlay panelAnssiKarvonenOttoSeppälä. 2008<br><a href="https://www.iucnredlist.org/species/5369/174778292">https://www.iucnredlist.org/species/5369/174778292</a>                                                                                                                                                                           | High      |
| 2                                              | 1.02 | Is the taxon harvested in the wild and likely to be sold or used in its live form?                                                                                      | Yes                                                 |                                                                                                                                                                                                                                                                                                                                                                                                                                                                                  | High      |
| 3                                              | 1.03 | Does the taxon have invasive races, varieties, sub-taxa or congeners?                                                                                                   | Yes                                                 | <i>Coregonus albula</i>                                                                                                                                                                                                                                                                                                                                                                                                                                                          | High      |
| 2. Climate, distribution and introduction risk |      |                                                                                                                                                                         |                                                     |                                                                                                                                                                                                                                                                                                                                                                                                                                                                                  |           |
| 4                                              | 2.01 | How similar are the climatic conditions of the Risk Assessment (RA) area and the taxon's native range?                                                                  | High                                                | Europe whitefish                                                                                                                                                                                                                                                                                                                                                                                                                                                                 | Medium    |
| 5                                              | 2.02 | What is the quality of the climate matching data?                                                                                                                       | Medium                                              | Logic                                                                                                                                                                                                                                                                                                                                                                                                                                                                            | Medium    |
| 6                                              | 2.03 | Is the taxon already present outside of captivity in the RA area?                                                                                                       | Yes                                                 | Habekovic, D. (1972). Introdukcija <i>Coregonusa</i> -- ozimica u nase vode. Ribarstvo Jugoslavije, 28, 143.                                                                                                                                                                                                                                                                                                                                                                     | Very high |
| 7                                              | 2.04 | How many potential vectors could the taxon use to enter in the RA area?                                                                                                 | One                                                 | Habekovic, D. (1972). Introdukcija <i>Coregonusa</i> -- ozimica u nase vode. Ribarstvo Jugoslavije, 28, 143.                                                                                                                                                                                                                                                                                                                                                                     | High      |
| 8                                              | 2.05 | Is the taxon currently found in close proximity to, and likely to enter into, the RA area in the near future (e.g. unintentional and intentional introductions)?        | Yes                                                 | Habekovic, D. (1972). Introdukcija <i>Coregonusa</i> -- ozimica u nase vode. Ribarstvo Jugoslavije, 28, 143.                                                                                                                                                                                                                                                                                                                                                                     | Very high |
| 3. Invasive elsewhere                          |      |                                                                                                                                                                         |                                                     |                                                                                                                                                                                                                                                                                                                                                                                                                                                                                  |           |
| 9                                              | 3.01 | Has the taxon become naturalised (established viable populations) outside its native range?                                                                             | Yes                                                 | FRESHWATER ALIEN FISH SPECIES INTRODUCED INTO CROATIA FOR AQUACULTURE AND CONSEQUENCES OF THEIR ESCAPES AND RELEASES IN INLAND WATERS Marina Piria1*, Divna Lukić1, Tatjana Boroša-Pecigoš 2016                                                                                                                                                                                                                                                                                  | Very high |
| 10                                             | 3.02 | In the taxon's introduced range, are there known adverse impacts to wild stocks or commercial taxa?                                                                     | No                                                  | Berg S., Jeppesen E., Søndergaard M., Mortensen E. (1994) Environmental effects of introducing whitefish, <i>Coregonus lavaretus</i> (L.), in Lake Ring. In: Mortensen E., Jeppesen E., Søndergaard M., Nielsen L.K. (eds) Nutrient Dynamics and Biological Structure in Shallow Freshwater and Brackish Lakes. Developments in Hydrobiology, vol 94. Springer, Dordrecht. <a href="https://doi.org/10.1007/978-94-017-2460-9_7">https://doi.org/10.1007/978-94-017-2460-9_7</a> | High      |
| 11                                             | 3.03 | In the taxon's introduced range, are there known adverse impacts to aquaculture?                                                                                        | No                                                  | Berg S., Jeppesen E., Søndergaard M., Mortensen E. (1994) Environmental effects of introducing whitefish, <i>Coregonus lavaretus</i> (L.), in Lake Ring. In: Mortensen E., Jeppesen E., Søndergaard M., Nielsen L.K. (eds) Nutrient Dynamics and Biological Structure in Shallow Freshwater and Brackish Lakes. Developments in Hydrobiology, vol 94. Springer, Dordrecht. <a href="https://doi.org/10.1007/978-94-017-2460-9_7">https://doi.org/10.1007/978-94-017-2460-9_7</a> | High      |
| 12                                             | 3.04 | In the taxon's introduced range, are there known adverse impacts to ecosystem services?                                                                                 | No                                                  | Berg S., Jeppesen E., Søndergaard M., Mortensen E. (1994) Environmental effects of introducing whitefish, <i>Coregonus lavaretus</i> (L.), in Lake Ring. In: Mortensen E., Jeppesen E., Søndergaard M., Nielsen L.K. (eds) Nutrient Dynamics and Biological Structure in Shallow Freshwater and Brackish Lakes. Developments in Hydrobiology, vol 94. Springer, Dordrecht. <a href="https://doi.org/10.1007/978-94-017-2460-9_7">https://doi.org/10.1007/978-94-017-2460-9_7</a> | High      |
| 13                                             | 3.05 | In the taxon's introduced range, are there known adverse socio-economic impacts?                                                                                        | No                                                  | Berg S., Jeppesen E., Søndergaard M., Mortensen E. (1994) Environmental effects of introducing whitefish, <i>Coregonus lavaretus</i> (L.), in Lake Ring. In: Mortensen E., Jeppesen E., Søndergaard M., Nielsen L.K. (eds) Nutrient Dynamics and Biological Structure in Shallow Freshwater and Brackish Lakes. Developments in Hydrobiology, vol 94. Springer, Dordrecht. <a href="https://doi.org/10.1007/978-94-017-2460-9_7">https://doi.org/10.1007/978-94-017-2460-9_7</a> | High      |
| B. Biology/ Ecology                            |      |                                                                                                                                                                         |                                                     |                                                                                                                                                                                                                                                                                                                                                                                                                                                                                  |           |
| 4. Undesirable (or persistence) traits         |      |                                                                                                                                                                         |                                                     |                                                                                                                                                                                                                                                                                                                                                                                                                                                                                  |           |
| 14                                             | 4.01 | Is it likely that the taxon will be poisonous or pose other risks to human health?                                                                                      | No                                                  | <a href="https://www.iucnredlist.org/species/5369/174778292">https://www.iucnredlist.org/species/5369/174778292</a>                                                                                                                                                                                                                                                                                                                                                              | Very high |
| 15                                             | 4.02 | Is it likely that the taxon will smother one or more native taxa (that are not threatened or protected)?                                                                | No                                                  | Berg S., Jeppesen E., Søndergaard M., Mortensen E. (1994) Environmental effects of introducing whitefish, <i>Coregonus lavaretus</i> (L.), in Lake Ring. In: Mortensen E., Jeppesen E., Søndergaard M., Nielsen L.K. (eds) Nutrient Dynamics and Biological Structure in Shallow Freshwater and Brackish Lakes. Developments in Hydrobiology, vol 94. Springer, Dordrecht. <a href="https://doi.org/10.1007/978-94-017-2460-9_7">https://doi.org/10.1007/978-94-017-2460-9_7</a> | High      |
| 16                                             | 4.03 | Are there any threatened or protected taxa that the non-native taxon would parasitise in the RA area?                                                                   | No                                                  | <a href="https://www.iucnredlist.org/species/5369/174778292">https://www.iucnredlist.org/species/5369/174778292</a>                                                                                                                                                                                                                                                                                                                                                              | Very high |
| 17                                             | 4.04 | Is the taxon adaptable in terms of climatic and other environmental conditions, thus enhancing its potential persistence if it has invaded or could invade the RA area? | Yes                                                 | Kottelat 2007                                                                                                                                                                                                                                                                                                                                                                                                                                                                    | High      |

|                                 |      |                                                                                                                                                                 |     |                                                                                                                                                                                                                                                                                                                                                                                                                                                                                  |           |
|---------------------------------|------|-----------------------------------------------------------------------------------------------------------------------------------------------------------------|-----|----------------------------------------------------------------------------------------------------------------------------------------------------------------------------------------------------------------------------------------------------------------------------------------------------------------------------------------------------------------------------------------------------------------------------------------------------------------------------------|-----------|
| 18                              | 4.05 | Is the taxon likely to disrupt food-web structure/function in aquatic ecosystems if it has invaded or is likely to invade the RA area?                          | Yes | Berg S., Jeppesen E., Søndergaard M., Mortensen E. (1994) Environmental effects of introducing whitefish, <i>Coregonus lavaretus</i> (L.), in Lake Ring. In: Mortensen E., Jeppesen E., Søndergaard M., Nielsen L.K. (eds) Nutrient Dynamics and Biological Structure in Shallow Freshwater and Brackish Lakes. Developments in Hydrobiology, vol 94. Springer, Dordrecht. <a href="https://doi.org/10.1007/978-94-017-2460-9_7">https://doi.org/10.1007/978-94-017-2460-9_7</a> | High      |
| 19                              | 4.06 | Is the taxon likely to exert adverse impacts on ecosystem services in the RA area?                                                                              | No  | Habekovic, D. (1972). Introdukcija <i>Coregonusa</i> -- ozimica u nase vode. Ribarstvo Jugoslavije, 28, 143.                                                                                                                                                                                                                                                                                                                                                                     | High      |
| 20                              | 4.07 | Is it likely that the taxon will host, and/or act as a vector for, recognised pests and infectious agents that are endemic in the RA area?                      | No  | Habekovic, D. (1972). Introdukcija <i>Coregonusa</i> -- ozimica u nase vode. Ribarstvo Jugoslavije, 28, 143.                                                                                                                                                                                                                                                                                                                                                                     | High      |
| 21                              | 4.08 | Is it likely that the taxon will host, and/or act as a vector for, recognised pests and infectious agents that are absent from (novel to) the RA area?          | Yes | Effect of eye fluke infection on the growth of whitefish ( <i>Coregonus lavaretus</i> ) —An experimental approach Author links open overlay panelAnsikarvonenaOttoSeppälä. 2008                                                                                                                                                                                                                                                                                                  | High      |
| 22                              | 4.09 | Is it likely that the taxon will achieve a body size that will make it more likely to be released from captivity?                                               | No  | Kottelat 2007                                                                                                                                                                                                                                                                                                                                                                                                                                                                    | High      |
| 23                              | 4.10 | Is the taxon capable of sustaining itself in a range of water velocity conditions (e.g. versatile in habitat use)?                                              | Yes | <a href="https://www.fishbase.in/summary/Coregonus-lavaretus.html">https://www.fishbase.in/summary/Coregonus-lavaretus.html</a>                                                                                                                                                                                                                                                                                                                                                  | Medium    |
| 24                              | 4.11 | Is it likely that the taxon's mode of existence (e.g. excretion of by-products) or behaviours (e.g. feeding) will reduce habitat quality for native taxa?       | Yes | Berg S., Jeppesen E., Søndergaard M., Mortensen E. (1994) Environmental effects of introducing whitefish, <i>Coregonus lavaretus</i> (L.), in Lake Ring. In: Mortensen E., Jeppesen E., Søndergaard M., Nielsen L.K. (eds) Nutrient Dynamics and Biological Structure in Shallow Freshwater and Brackish Lakes. Developments in Hydrobiology, vol 94. Springer, Dordrecht. <a href="https://doi.org/10.1007/978-94-017-2460-9_7">https://doi.org/10.1007/978-94-017-2460-9_7</a> | High      |
| 25                              | 4.12 | Is the taxon likely to maintain a viable population even when present in low densities (or persisting in adverse conditions by way of a dormant form)?          | No  | Berg S., Jeppesen E., Søndergaard M., Mortensen E. (1994) Environmental effects of introducing whitefish, <i>Coregonus lavaretus</i> (L.), in Lake Ring. In: Mortensen E., Jeppesen E., Søndergaard M., Nielsen L.K. (eds) Nutrient Dynamics and Biological Structure in Shallow Freshwater and Brackish Lakes. Developments in Hydrobiology, vol 94. Springer, Dordrecht. <a href="https://doi.org/10.1007/978-94-017-2460-9_7">https://doi.org/10.1007/978-94-017-2460-9_7</a> | High      |
| <b>5. Resource exploitation</b> |      |                                                                                                                                                                 |     |                                                                                                                                                                                                                                                                                                                                                                                                                                                                                  |           |
| 26                              | 5.01 | Is the taxon likely to consume threatened or protected native taxa in the RA area?                                                                              | Yes | Berg S., Jeppesen E., Søndergaard M., Mortensen E. (1994) Environmental effects of introducing whitefish, <i>Coregonus lavaretus</i> (L.), in Lake Ring. In: Mortensen E., Jeppesen E., Søndergaard M., Nielsen L.K. (eds) Nutrient Dynamics and Biological Structure in Shallow Freshwater and Brackish Lakes. Developments in Hydrobiology, vol 94. Springer, Dordrecht. <a href="https://doi.org/10.1007/978-94-017-2460-9_7">https://doi.org/10.1007/978-94-017-2460-9_7</a> | High      |
| 27                              | 5.02 | Is the taxon likely to sequester food resources (including nutrients) to the detriment of native taxa in the RA area?                                           | Yes | Berg S., Jeppesen E., Søndergaard M., Mortensen E. (1994) Environmental effects of introducing whitefish, <i>Coregonus lavaretus</i> (L.), in Lake Ring. In: Mortensen E., Jeppesen E., Søndergaard M., Nielsen L.K. (eds) Nutrient Dynamics and Biological Structure in Shallow Freshwater and Brackish Lakes. Developments in Hydrobiology, vol 94. Springer, Dordrecht. <a href="https://doi.org/10.1007/978-94-017-2460-9_7">https://doi.org/10.1007/978-94-017-2460-9_7</a> | High      |
| <b>6. Reproduction</b>          |      |                                                                                                                                                                 |     |                                                                                                                                                                                                                                                                                                                                                                                                                                                                                  |           |
| 28                              | 6.01 | Is the taxon likely to exhibit parental care and/or to reduce age-at-maturity in response to environmental conditions?                                          | Yes | Probably                                                                                                                                                                                                                                                                                                                                                                                                                                                                         | Medium    |
| 29                              | 6.02 | Is the taxon likely to produce viable gametes or propagules (in the RA area)?                                                                                   | Yes | Habekovic, D. (1972). Introdukcija <i>Coregonusa</i> -- ozimica u nase vode. Ribarstvo Jugoslavije, 28, 143.                                                                                                                                                                                                                                                                                                                                                                     | High      |
| 30                              | 6.03 | Is the taxon likely to hybridise naturally with native taxa?                                                                                                    | No  | Habekovic, D. (1972). Introdukcija <i>Coregonusa</i> -- ozimica u nase vode. Ribarstvo Jugoslavije, 28, 143.                                                                                                                                                                                                                                                                                                                                                                     | Very high |
| 31                              | 6.04 | Is the taxon likely to be hermaphroditic or to display asexual reproduction?                                                                                    | No  | <a href="https://www.iucnredlist.org/species/5369/174778292">https://www.iucnredlist.org/species/5369/174778292</a>                                                                                                                                                                                                                                                                                                                                                              | High      |
| 32                              | 6.05 | Is the taxon dependent on the presence of another taxon (or specific habitat features) to complete its life cycle?                                              | No  | <a href="https://www.iucnredlist.org/species/5369/174778292">https://www.iucnredlist.org/species/5369/174778292</a>                                                                                                                                                                                                                                                                                                                                                              | Very high |
| 33                              | 6.06 | Is the taxon known (or likely) to produce a large number of propagules or offspring within a short time span (e.g. < 1 year)?                                   | Yes | <a href="https://www.iucnredlist.org/species/5369/174778292">https://www.iucnredlist.org/species/5369/174778292</a>                                                                                                                                                                                                                                                                                                                                                              | High      |
| 34                              | 6.07 | How many time units (days, months, years) does the taxon require to reach the age-at-first-reproduction?                                                        | 3   | Planktivory and diet-overlap of densely raked whitefish ( <i>Coregonus lavaretus</i> (L.)) in a subarctic lake K. Kahilainen, E. Alajärvi, H. Lehtonen. 2005                                                                                                                                                                                                                                                                                                                     | High      |
| <b>7. Dispersal mechanisms</b>  |      |                                                                                                                                                                 |     |                                                                                                                                                                                                                                                                                                                                                                                                                                                                                  |           |
| 35                              | 7.01 | How many potential internal vectors/pathways could the taxon use to disperse within the RA area (with suitable vectors)?                                        | One | Habekovic, D. (1972). Introdukcija <i>Coregonusa</i> -- ozimica u nase vode. Ribarstvo Jugoslavije, 28, 143.                                                                                                                                                                                                                                                                                                                                                                     | High      |
| 36                              | 7.02 | Will any of these vectors/pathways bring the taxon in close proximity to one or more protected areas (e.g. MCZ, MPA, SSSI)?                                     | Yes | Habekovic, D. (1972). Introdukcija <i>Coregonusa</i> -- ozimica u nase vode. Ribarstvo Jugoslavije, 28, 143.                                                                                                                                                                                                                                                                                                                                                                     | Very high |
| 37                              | 7.03 | Does the taxon have a means of actively attaching itself to hard substrata (e.g. ship hulls, pilings, buoys) such that it enhances the likelihood of dispersal? | No  | Habekovic, D. (1972). Introdukcija <i>Coregonusa</i> -- ozimica u nase vode. Ribarstvo Jugoslavije, 28, 143.                                                                                                                                                                                                                                                                                                                                                                     | Very high |
| 38                              | 7.04 | Is natural dispersal of the taxon likely to occur as eggs (for animals) or as propagules (for plants: seeds, spores) in the RA area?                            | No  | Habekovic, D. (1972). Introdukcija <i>Coregonusa</i> -- ozimica u nase vode. Ribarstvo Jugoslavije, 28, 143.                                                                                                                                                                                                                                                                                                                                                                     | High      |
| 39                              | 7.05 | Is natural dispersal of the taxon likely to occur as larvae/juveniles (for animals) or as fragments/seedlings (for plants) in the RA area?                      | Yes | Habekovic, D. (1972). Introdukcija <i>Coregonusa</i> -- ozimica u nase vode. Ribarstvo Jugoslavije, 28, 143.                                                                                                                                                                                                                                                                                                                                                                     | High      |
| 40                              | 7.06 | Are older life stages of the taxon likely to migrate in the RA area for reproduction?                                                                           | Yes | Habekovic, D. (1972). Introdukcija <i>Coregonusa</i> -- ozimica u nase vode. Ribarstvo Jugoslavije, 28, 143.                                                                                                                                                                                                                                                                                                                                                                     | High      |

|                                |      |                                                                                                                                                                              |           |                                                                                                                                                                                        |           |
|--------------------------------|------|------------------------------------------------------------------------------------------------------------------------------------------------------------------------------|-----------|----------------------------------------------------------------------------------------------------------------------------------------------------------------------------------------|-----------|
| 41                             | 7.07 | Are propagules or eggs of the taxon likely to be dispersed in the RA area by other animals?                                                                                  | No        | Habekovic, D. (1972). Introdukcija Coregonusa -- ozimica u nase vode. Ribarstvo Jugoslavije, 28, 143.                                                                                  | High      |
| 42                             | 7.08 | Is dispersal of the taxon along any of the vectors/pathways mentioned in the previous seven questions (35–41; i.e. both unintentional or intentional) likely to be           | No        | Habekovic, D. (1972). Introdukcija Coregonusa -- ozimica u nase vode. Ribarstvo Jugoslavije, 28, 143.                                                                                  | High      |
| 43                             | 7.09 | Is dispersal of the taxon density dependent?                                                                                                                                 | Yes       | Effects of Climatic and Density-Dependent Factors on Year-Class Strength of Coregonus lavaretus in Lake Constance Authors: Reiner Eckmann, Ursula Gaedke, and Hans Johst Wetzlar. 1988 | Very high |
| <b>8. Tolerance attributes</b> |      |                                                                                                                                                                              |           |                                                                                                                                                                                        |           |
| 44                             | 8.01 | Is the taxon able to withstand being out of water for extended periods (e.g. minimum of one or more hours) at some stage of its life cycle?                                  | No        | <a href="https://www.fishbase.in/summary/Coregonus-lavaretus.html">https://www.fishbase.in/summary/Coregonus-lavaretus.html</a>                                                        | Very high |
| 45                             | 8.02 | Is the taxon tolerant of a wide range of water quality conditions relevant to that taxon? [In the Justification field, indicate the relevant water quality variable(s) being | No        | <a href="https://www.luontoportti.com/suomi/en/kalat/whitefish">https://www.luontoportti.com/suomi/en/kalat/whitefish</a>                                                              | High      |
| 46                             | 8.03 | Can the taxon be controlled or eradicated in the wild with chemical, biological, or other agents/means?                                                                      | No        | <a href="https://www.luontoportti.com/suomi/en/kalat/whitefish">https://www.luontoportti.com/suomi/en/kalat/whitefish</a>                                                              | High      |
| 47                             | 8.04 | Is the taxon likely to tolerate or benefit from environmental/human disturbance?                                                                                             | No        | <a href="https://www.luontoportti.com/suomi/en/kalat/whitefish">https://www.luontoportti.com/suomi/en/kalat/whitefish</a>                                                              | High      |
| 48                             | 8.05 | Is the taxon able to tolerate salinity levels that are higher or lower than those found in its usual environment?                                                            | Yes       | <a href="https://www.luontoportti.com/suomi/en/kalat/whitefish">https://www.luontoportti.com/suomi/en/kalat/whitefish</a>                                                              | Medium    |
| 49                             | 8.06 | Are there effective natural enemies (predators) of the taxon present in the RA                                                                                               | Yes       | <a href="https://www.luontoportti.com/suomi/en/kalat/whitefish">https://www.luontoportti.com/suomi/en/kalat/whitefish</a>                                                              | Very high |
| <b>C. Climate change</b>       |      |                                                                                                                                                                              |           |                                                                                                                                                                                        |           |
| <b>9. Climate change</b>       |      |                                                                                                                                                                              |           |                                                                                                                                                                                        |           |
| 50                             | 9.01 | Under the predicted future climatic conditions, are the risks of entry into the RA area posed by the taxon likely to increase, decrease or not change?                       | No change | Habekovic, D. (1972). Introdukcija Coregonusa -- ozimica u nase vode. Ribarstvo Jugoslavije, 28, 143.                                                                                  | High      |
| 51                             | 9.02 | Under the predicted future climatic conditions, are the risks of establishment posed by the taxon likely to increase, decrease or not change?                                | No change | Habekovic, D. (1972). Introdukcija Coregonusa -- ozimica u nase vode. Ribarstvo Jugoslavije, 28, 143.                                                                                  | High      |
| 52                             | 9.03 | Under the predicted future climatic conditions, are the risks of dispersal within the RA area posed by the taxon likely to increase, decrease or not change?                 | No change | Habekovic, D. (1972). Introdukcija Coregonusa -- ozimica u nase vode. Ribarstvo Jugoslavije, 28, 143.                                                                                  | High      |
| 53                             | 9.04 | Under the predicted future climatic conditions, what is the likely magnitude of future potential impacts on biodiversity and/or ecological integrity/status?                 | Lower     | Habekovic, D. (1972). Introdukcija Coregonusa -- ozimica u nase vode. Ribarstvo Jugoslavije, 28, 143.                                                                                  | Medium    |
| 54                             | 9.05 | Under the predicted future climatic conditions, what is the likely magnitude of future potential impacts on ecosystem structure and/or function?                             | Lower     | Habekovic, D. (1972). Introdukcija Coregonusa -- ozimica u nase vode. Ribarstvo Jugoslavije, 28, 143.                                                                                  | Medium    |
| 55                             | 9.06 | Under the predicted future climatic conditions, what is the likely magnitude of future potential impacts on ecosystem services/socio-economic factors?                       | Lower     | Habekovic, D. (1972). Introdukcija Coregonusa -- ozimica u nase vode. Ribarstvo Jugoslavije, 28, 143.                                                                                  | Medium    |

| Statistics                                     |             |
|------------------------------------------------|-------------|
| Scores                                         |             |
| <b>BRA</b>                                     | <b>21.0</b> |
| <b>BRA Outcome</b>                             | <b>-</b>    |
| <b>BRA+CCA</b>                                 | <b>15.0</b> |
| <b>BRA+CCA Outcome</b>                         | <b>-</b>    |
| Score partition                                |             |
| <b>A. Biogeography/Historical</b>              | <b>7.0</b>  |
| 1. Domestication/Cultivation                   | 4.0         |
| 2. Climate, distribution and introduction risk | 1.0         |
| 3. Invasive elsewhere                          | 2.0         |
| <b>B. Biology/Ecology</b>                      | <b>14.0</b> |
| 4. Undesirable (or persistence) traits         | 5.0         |
| 5. Resource exploitation                       | 7.0         |
| 6. Reproduction                                | 2.0         |
| 7. Dispersal mechanisms                        | 1.0         |
| 8. Tolerance attributes                        | -1.0        |
| <b>C. Climate change</b>                       | <b>-6.0</b> |
| 9. Climate change                              | -6.0        |
| Answered Questions                             |             |
| <b>Total</b>                                   | <b>55</b>   |
| <b>A. Biogeography/Historical</b>              | <b>13</b>   |
| 1. Domestication/Cultivation                   | 3           |
| 2. Climate, distribution and introduction risk | 5           |
| 3. Invasive elsewhere                          | 5           |
| <b>B. Biology/Ecology</b>                      | <b>36</b>   |
| 4. Undesirable (or persistence) traits         | 12          |
| 5. Resource exploitation                       | 2           |
| 6. Reproduction                                | 7           |
| 7. Dispersal mechanisms                        | 9           |
| 8. Tolerance attributes                        | 6           |
| <b>C. Climate change</b>                       | <b>6</b>    |
| 9. Climate change                              | 6           |
| Sectors affected                               |             |
| <b>Commercial</b>                              | <b>2</b>    |
| <b>Environmental</b>                           | <b>4</b>    |

|                                       |    |
|---------------------------------------|----|
| Species or population nuisance traits | 11 |
|---------------------------------------|----|

| Thresholds |         |      |
|------------|---------|------|
|            | BRA     | -    |
|            | BRA+CCA | -    |
| Confidence |         |      |
|            | BRA+CCA | 0.77 |
|            | BRA     | 0.79 |
|            | CCA     | 0.63 |

| Date and Time       |  |
|---------------------|--|
| 25/05/2021 09:33:02 |  |



## AS-ISK v2

| Taxon and Assessor details         |                                         |
|------------------------------------|-----------------------------------------|
| Category                           | Fishes and Lampreys (freshwater)        |
| Taxon name                         | <i>Coregonus lavaretus</i>              |
| Common name                        | European whitefish                      |
| Assessor                           | Ivan Špelić                             |
| Risk screening context             |                                         |
| Reason and socio-economic benefits |                                         |
| Risk assessment area               | Danube & Adriatic basins BA, HR, ME, RS |
| Taxonomy                           |                                         |
| Native range                       |                                         |
| Introduced range                   |                                         |
| URL                                |                                         |

|                                                |      |                                                                                                                                                                         | Response       | Justification (references and/or other information)                                                                                                                                                                                                                                                                   | Confidence |
|------------------------------------------------|------|-------------------------------------------------------------------------------------------------------------------------------------------------------------------------|----------------|-----------------------------------------------------------------------------------------------------------------------------------------------------------------------------------------------------------------------------------------------------------------------------------------------------------------------|------------|
| A. Biogeography / Historical                   |      |                                                                                                                                                                         |                |                                                                                                                                                                                                                                                                                                                       |            |
| 1. Domestication/Cultivation                   |      |                                                                                                                                                                         |                |                                                                                                                                                                                                                                                                                                                       |            |
| 1                                              | 1.01 | Has the taxon been the subject of domestication (or cultivation) for at least 20 generations?                                                                           | Yes            | Froese & Pauly 2020                                                                                                                                                                                                                                                                                                   | Very high  |
| 2                                              | 1.02 | Is the taxon harvested in the wild and likely to be sold or used in its live form?                                                                                      | No             | Farmed for food and restocking, no harvesting                                                                                                                                                                                                                                                                         | High       |
| 3                                              | 1.03 | Does the taxon have invasive races, varieties, sub-taxa or congeners?                                                                                                   | No             | There is no invasive subspecies                                                                                                                                                                                                                                                                                       | High       |
| 2. Climate, distribution and introduction risk |      |                                                                                                                                                                         |                |                                                                                                                                                                                                                                                                                                                       |            |
| 4                                              | 2.01 | How similar are the climatic conditions of the Risk Assessment (RA) area and the taxon's native range?                                                                  | Medium         | Climatch 2020                                                                                                                                                                                                                                                                                                         | Medium     |
| 5                                              | 2.02 | What is the quality of the climate matching data?                                                                                                                       | Medium         | Climatch 2020                                                                                                                                                                                                                                                                                                         | High       |
| 6                                              | 2.03 | Is the taxon already present outside of captivity in the RA area?                                                                                                       | Yes            | Froese, R. and D. Pauly. Editors. 2021.FishBase. World Wide Web electronic publication. www.fishbase.org, ( 02/2021 )                                                                                                                                                                                                 | Very high  |
| 7                                              | 2.04 | How many potential vectors could the taxon use to enter in the RA area?                                                                                                 | Not applicable | Already present (Froese, R. and D. Pauly. Editors. 2021.FishBase. World Wide Web electronic publication. www.fishbase.org, ( 02/2021 )).                                                                                                                                                                              | Very high  |
| 8                                              | 2.05 | Is the taxon currently found in close proximity to, and likely to enter into, the RA area in the near future (e.g. unintentional and intentional introductions)?        | Not applicable | Already present (Froese, R. and D. Pauly. Editors. 2021.FishBase. World Wide Web electronic publication. www.fishbase.org, ( 02/2021 )).                                                                                                                                                                              | Very high  |
| 3. Invasive elsewhere                          |      |                                                                                                                                                                         |                |                                                                                                                                                                                                                                                                                                                       |            |
| 9                                              | 3.01 | Has the taxon become naturalised (established viable populations) outside its                                                                                           | Yes            | Simonović, 2012                                                                                                                                                                                                                                                                                                       | Very high  |
| 10                                             | 3.02 | In the taxon's introduced range, are there known adverse impacts to wild stocks or commercial taxa?                                                                     | Yes            | Introductions to countries outside its native range have resulted in negative impacts for native species (Powan (Coregonus lavaretus) Ecological Risk Screening Summary, U.S. Fish and Wildlife Service, August 2012).                                                                                                | High       |
| 11                                             | 3.03 | In the taxon's introduced range, are there known adverse impacts to aquaculture?                                                                                        | No             | no documented evidence                                                                                                                                                                                                                                                                                                | Medium     |
| 12                                             | 3.04 | In the taxon's introduced range, are there known adverse impacts to ecosystem services?                                                                                 | Yes            | The species is one of the most widely introduced fish species in northern Europe and has partially or completely displaced many native Arctic charr (Salvelinus alpinus) populations (Powan (Coregonus lavaretus) Ecological Risk Screening Summary, U.S. Fish and Wildlife Service, August 2012) probably decreasing | Medium     |
| 13                                             | 3.05 | In the taxon's introduced range, are there known adverse socio-economic impacts?                                                                                        | Yes            | The species is one of the most widely introduced fish species in northern Europe and has partially or completely displaced many native Arctic charr (Salvelinus alpinus) populations (Powan (Coregonus lavaretus) Ecological Risk Screening Summary, U.S. Fish and Wildlife Service, August 2012) probably decreasing | Medium     |
| B. Biology / Ecology                           |      |                                                                                                                                                                         |                |                                                                                                                                                                                                                                                                                                                       |            |
| 4. Undesirable (or persistence) traits         |      |                                                                                                                                                                         |                |                                                                                                                                                                                                                                                                                                                       |            |
| 14                                             | 4.01 | Is it likely that the taxon will be poisonous or pose other risks to human health?                                                                                      | No             | Jevtić, 1991                                                                                                                                                                                                                                                                                                          | Very high  |
| 15                                             | 4.02 | Is it likely that the taxon will smother one or more native taxa (that are not threatened or protected)?                                                                | Yes            | The species is one of the most widely introduced fish species in northern Europe and has partially or completely displaced many native Arctic charr (Salvelinus alpinus) (Powan (Coregonus lavaretus) Ecological Risk Screening Summary, U.S. Fish and Wildlife Service, August 2012).                                | High       |
| 16                                             | 4.03 | Are there any threatened or protected taxa that the non-native taxon would parasitise in the RA area?                                                                   | No             | Jevtić, 1991                                                                                                                                                                                                                                                                                                          | Very high  |
| 17                                             | 4.04 | Is the taxon adaptable in terms of climatic and other environmental conditions, thus enhancing its potential persistence if it has invaded or could invade the RA area? | No             | This is a species living in clear, cold and well-oxygenated waters (Orban et al. 2006).                                                                                                                                                                                                                               | Very high  |
| 18                                             | 4.05 | Is the taxon likely to disrupt food-web structure/function in aquatic ecosystems if it has invaded or is likely to invade the RA                                        | Yes            | Foraging by introduced C. lavaretus can change the structure of the zooplankton community (Powan (Coregonus lavaretus) Ecological Risk Screening Summary, U.S. Fish and Wildlife                                                                                                                                      | High       |
| 19                                             | 4.06 | Is the taxon likely to exert adverse impacts on ecosystem services in the RA area?                                                                                      | Yes            | The main conclusion is that whitefish stocking of eutrophic lakes for commercial or other purposes may delay their recovery following nutrient load reduction, or even lead to enhanced eutrophication (Berg 1994).                                                                                                   | Low        |
| 20                                             | 4.07 | Is it likely that the taxon will host, and/or act as a vector for, recognised pests and infectious agents that are endemic in the RA                                    | Yes            | Skall et al. (2004)                                                                                                                                                                                                                                                                                                   | High       |
| 21                                             | 4.08 | Is it likely that the taxon will host, and/or act as a vector for, recognised pests and infectious agents that are absent from (novel to) the RA area?                  | Yes            | Skall et al. (2004)                                                                                                                                                                                                                                                                                                   | High       |

|                                 |      |                                                                                                                                                                              |                |                                                                                                                                                                                                                                                                                                                                                     |           |
|---------------------------------|------|------------------------------------------------------------------------------------------------------------------------------------------------------------------------------|----------------|-----------------------------------------------------------------------------------------------------------------------------------------------------------------------------------------------------------------------------------------------------------------------------------------------------------------------------------------------------|-----------|
| 22                              | 4.09 | Is it likely that the taxon will achieve a body size that will make it more likely to be released from captivity?                                                            | Yes            | In introduced lake: 50 cm TL (Jevtić, 1991)                                                                                                                                                                                                                                                                                                         | Very high |
| 23                              | 4.10 | Is the taxon capable of sustaining itself in a range of water velocity conditions (e.g. versatile in habitat use)?                                                           | Yes            | Jevtić, 1991                                                                                                                                                                                                                                                                                                                                        | Very high |
| 24                              | 4.11 | Is it likely that the taxon's mode of existence (e.g. excretion of by-products) or behaviours (e.g. feeding) will reduce habitat quality for native taxa?                    | No             | It is written that there is no impact but without research (Jevtić, 1991)                                                                                                                                                                                                                                                                           | Low       |
| 25                              | 4.12 | Is the taxon likely to maintain a viable population even when present in low densities (or persisting in adverse conditions by way of a dormant form)?                       | No             | Introduction to one area with low number of specimens wasn't succesful (Habeković, 1978)                                                                                                                                                                                                                                                            | Very high |
| <b>5. Resource exploitation</b> |      |                                                                                                                                                                              |                |                                                                                                                                                                                                                                                                                                                                                     |           |
| 26                              | 5.01 | Is the taxon likely to consume threatened or protected native taxa in the RA area?                                                                                           | No             | Feeds on planktonic crustaceans (Froese & Pauly 2020).                                                                                                                                                                                                                                                                                              | High      |
| 27                              | 5.02 | Is the taxon likely to sequester food resources (including nutrients) to the detriment of native taxa in the RA area?                                                        | Not applicable | No data for calculations.                                                                                                                                                                                                                                                                                                                           | Very high |
| <b>6. Reproduction</b>          |      |                                                                                                                                                                              |                |                                                                                                                                                                                                                                                                                                                                                     |           |
| 28                              | 6.01 | Is the taxon likely to exhibit parental care and/or to reduce age-at-maturity in response to environmental conditions?                                                       | No             | Jevtić, 1991                                                                                                                                                                                                                                                                                                                                        | Very high |
| 29                              | 6.02 | Is the taxon likely to produce viable gametes or propagules (in the RA area)?                                                                                                | Yes            | Jevtić, 1991                                                                                                                                                                                                                                                                                                                                        | Very high |
| 30                              | 6.03 | Is the taxon likely to hybridise naturally with native taxa?                                                                                                                 | No             | No related native taxa                                                                                                                                                                                                                                                                                                                              | Very high |
| 31                              | 6.04 | Is the taxon likely to be hermaphroditic or to display asexual reproduction?                                                                                                 | No             | Jevtić, 1991                                                                                                                                                                                                                                                                                                                                        | Very high |
| 32                              | 6.05 | Is the taxon dependent on the presence of another taxon (or specific habitat features) to complete its life cycle?                                                           | No             | Spawns in gravel, near shore, in shallow waterv(Froese & Pauly 2020).                                                                                                                                                                                                                                                                               | Very high |
| 33                              | 6.06 | Is the taxon known (or likely) to produce a large number of propagules or offspring within a short time span (e.g. < 1 year)?                                                | Yes            | Jevtić, 1991 (30 000-50000)                                                                                                                                                                                                                                                                                                                         | Very high |
| 34                              | 6.07 | How many time units (days, months, years) does the taxon require to reach the age-at-first-reproduction?                                                                     | 2              | 1-4 years in literature (Froese & Pauly 2020).                                                                                                                                                                                                                                                                                                      | High      |
| <b>7. Dispersal mechanisms</b>  |      |                                                                                                                                                                              |                |                                                                                                                                                                                                                                                                                                                                                     |           |
| 35                              | 7.01 | How many potential internal vectors/pathways could the taxon use to disperse within the RA area (with suitable protected areas (e.g. MCZ, MPA, SSSI)?                        | >1             | Intentional introductions for angling (Froese and Pauly 2020) Floods (Povž et al. 2015)                                                                                                                                                                                                                                                             | Low       |
| 36                              | 7.02 | Will any of these vectors/pathways bring the taxon in close proximity to one or more protected areas (e.g. MCZ, MPA, SSSI)?                                                  | No             | Personal opinion                                                                                                                                                                                                                                                                                                                                    | Low       |
| 37                              | 7.03 | Does the taxon have a means of actively attaching itself to hard substrata (e.g. ship hulls, pilings, buoys) such that it enhances the likelihood of dispersal?              | No             | No known adaptations                                                                                                                                                                                                                                                                                                                                | Very high |
| 38                              | 7.04 | Is natural dispersal of the taxon likely to occur as eggs (for animals) or as propagules (for plants: seeds, spores) in the RA area?                                         | No             | Jevtić, 1991                                                                                                                                                                                                                                                                                                                                        | Low       |
| 39                              | 7.05 | Is natural dispersal of the taxon likely to occur as larvae/juveniles (for animals) or as fragments/seedlings (for plants) in the RA area?                                   | Yes            | Næsje, T., Jonsson, B., and Sandlund, O. 1986. Drift of cisco and white-fish larvae in a Norwegian river. Transactions of the American Fisheries Society, 115: 37–41.                                                                                                                                                                               | High      |
| 40                              | 7.06 | Are older life stages of the taxon likely to migrate in the RA area for reproduction?                                                                                        | No             | No documented data                                                                                                                                                                                                                                                                                                                                  | Low       |
| 41                              | 7.07 | Are propagules or eggs of the taxon likely to be dispersed in the RA area by other animals?                                                                                  | No             | Personal opinion                                                                                                                                                                                                                                                                                                                                    | Very high |
| 42                              | 7.08 | Is dispersal of the taxon along any of the vectors/pathways mentioned in the previous seven questions (35–41; i.e. both unintentional or intentional) likely to be           | Yes            | Floods, introductions                                                                                                                                                                                                                                                                                                                               | Very high |
| 43                              | 7.09 | Is dispersal of the taxon density dependent?                                                                                                                                 | No             | no documented data                                                                                                                                                                                                                                                                                                                                  | Low       |
| <b>8. Tolerance attributes</b>  |      |                                                                                                                                                                              |                |                                                                                                                                                                                                                                                                                                                                                     |           |
| 44                              | 8.01 | Is the taxon able to withstand being out of water for extended periods (e.g. minimum of one or more hours) at some stage of its life cycle?                                  | No             | Personal opinion                                                                                                                                                                                                                                                                                                                                    | Very high |
| 45                              | 8.02 | Is the taxon tolerant of a wide range of water quality conditions relevant to that taxon? [In the Justification field, indicate the relevant water quality variable(s) being | No             | Very sensitive to changes in temperature (Povž et al. 2015).                                                                                                                                                                                                                                                                                        | Very high |
| 46                              | 8.03 | Can the taxon be controlled or eradicated in the wild with chemical, biological, or other agents/means?                                                                      | No             | not allowed in the region.                                                                                                                                                                                                                                                                                                                          | Very high |
| 47                              | 8.04 | Is the taxon likely to tolerate or benefit from environmental/human disturbance?                                                                                             | Yes            | Known to live in artificial reservoirs (Jevtić 1991).                                                                                                                                                                                                                                                                                               | High      |
| 48                              | 8.05 | Is the taxon able to tolerate salinity levels that are higher or lower than those found in its usual environment?                                                            | Yes            | Coregonus lavaretus sensu lato can be found in different kinds of fresh-, brackish- and saltwater habitats (Papakostas, S., A. Vasemägi, J.-P. Vähä, M. Himberg, L. Peil et al., 2012 A proteomics approach reveals divergent molecular responses to salinity in populations of European whitefish (Coregonus lavaretus). Mol. Ecol. 21: 3516–3530. | High      |
| 49                              | 8.06 | Are there effective natural enemies (predators) of the taxon present in the RA area?                                                                                         | Yes            | Perch and pike (SAKSGÅRD, R., NÆSJE, T.F., SANDLUND O.T., UGEDAL, O. (2002): The effect of fish predators on whitefish (Coregonus lavaretus) habitat use in Lake Femund, a deep Norwegian Lake. – Arch. Hydrobiol. Spec. Issues Advanc. Limnol.                                                                                                     | Very high |
| <b>C. Climate change</b>        |      |                                                                                                                                                                              |                |                                                                                                                                                                                                                                                                                                                                                     |           |

| 9. Climate change |      |                                                                                                                                                              |                |                                                                                                                                                                                                                                                                                        |           |
|-------------------|------|--------------------------------------------------------------------------------------------------------------------------------------------------------------|----------------|----------------------------------------------------------------------------------------------------------------------------------------------------------------------------------------------------------------------------------------------------------------------------------------|-----------|
| 50                | 9.01 | Under the predicted future climatic conditions, are the risks of entry into the RA area posed by the taxon likely to increase, decrease or not change?       | Not applicable | Already present (Povže et al. 2015).                                                                                                                                                                                                                                                   | Very high |
| 51                | 9.02 | Under the predicted future climatic conditions, are the risks of establishment posed by the taxon likely to increase, decrease or not change?                | Decrease       | During the spawning season, water temperatures exceeding 8 °C, as are expected due to climate change, will likely cause a decline in whitefish reproductive success (Gillet 1991, Anneville et al. 2013).                                                                              | Medium    |
| 52                | 9.03 | Under the predicted future climatic conditions, are the risks of dispersal within the RA area posed by the taxon likely to increase, decrease or not change? | Decrease       | During the spawning season, water temperatures exceeding 8 °C, as are expected due to climate change, will likely cause a decline in whitefish reproductive success (Gillet 1991, Anneville et al. 2013). Intentional releases may stay the same but natural recruitment may decrease. | Medium    |
| 53                | 9.04 | Under the predicted future climatic conditions, what is the likely magnitude of future potential impacts on biodiversity and/or ecological integrity/status? | No change      | No recorded impacts so no change expected.                                                                                                                                                                                                                                             | Low       |
| 54                | 9.05 | Under the predicted future climatic conditions, what is the likely magnitude of future potential impacts on ecosystem structure and/or function?             | No change      | No recorded impact so no change expected.                                                                                                                                                                                                                                              | Low       |
| 55                | 9.06 | Under the predicted future climatic conditions, what is the likely magnitude of future potential impacts on ecosystem services/socio-economic factors?       | No change      | No recorded impact so no change expected.                                                                                                                                                                                                                                              | Low       |

| Statistics                                     |             |
|------------------------------------------------|-------------|
| Scores                                         |             |
| <b>BRA</b>                                     | <b>20.5</b> |
| <b>BRA Outcome</b>                             | <b>-</b>    |
| <b>BRA+CCA</b>                                 | <b>16.5</b> |
| <b>BRA+CCA Outcome</b>                         | <b>-</b>    |
| Score partition                                |             |
| <b>A. Biogeography/Historical</b>              | <b>11.5</b> |
| 1. Domestication/Cultivation                   | 0.0         |
| 2. Climate, distribution and introduction risk | 1.0         |
| 3. Invasive elsewhere                          | 10.5        |
| <b>B. Biology/Ecology</b>                      | <b>9.0</b>  |
| 4. Undesirable (or persistence) traits         | 6.0         |
| 5. Resource exploitation                       | 0.0         |
| 6. Reproduction                                | 1.0         |
| 7. Dispersal mechanisms                        | -1.0        |
| 8. Tolerance attributes                        | 3.0         |
| <b>C. Climate change</b>                       | <b>-4.0</b> |
| 9. Climate change                              | -4.0        |
| Answered Questions                             |             |
| <b>Total</b>                                   | <b>55</b>   |
| <b>A. Biogeography/Historical</b>              | <b>13</b>   |
| 1. Domestication/Cultivation                   | 3           |
| 2. Climate, distribution and introduction risk | 5           |
| 3. Invasive elsewhere                          | 5           |
| <b>B. Biology/Ecology</b>                      | <b>36</b>   |
| 4. Undesirable (or persistence) traits         | 12          |
| 5. Resource exploitation                       | 2           |
| 6. Reproduction                                | 7           |
| 7. Dispersal mechanisms                        | 9           |
| 8. Tolerance attributes                        | 6           |
| <b>C. Climate change</b>                       | <b>6</b>    |
| 9. Climate change                              | 6           |
| Sectors affected                               |             |
| <b>Commercial</b>                              | <b>10</b>   |
| <b>Environmental</b>                           | <b>5</b>    |
| <b>Species or population nuisance traits</b>   | <b>5</b>    |

| Thresholds     |             |
|----------------|-------------|
| <b>BRA</b>     | <b>-</b>    |
| <b>BRA+CCA</b> | <b>-</b>    |
| Confidence     |             |
| <b>BRA+CCA</b> | <b>0.75</b> |
| <b>BRA</b>     | <b>0.79</b> |
| <b>CCA</b>     | <b>0.46</b> |

| Date and Time       |  |
|---------------------|--|
| 13/05/2021 20:49:03 |  |

## AS-ISK v2

| Taxon and Assessor details         |                                         |
|------------------------------------|-----------------------------------------|
| Category                           | Fishes and Lampreys (freshwater)        |
| Taxon name                         | <i>Coregonus lavaretus</i>              |
| Common name                        | European whitefish                      |
| Assessor                           | Tamara Kanjuh                           |
| Risk screening context             |                                         |
| Reason and socio-economic benefits |                                         |
| Risk assessment area               | Danube & Adriatic basins BA, HR, ME, RS |
| Taxonomy                           |                                         |
| Native range                       |                                         |
| Introduced range                   |                                         |
| URL                                |                                         |

|                                                |      | Response                                                                                                                                                                | Justification (references and/or other information) | Confidence                                             |        |
|------------------------------------------------|------|-------------------------------------------------------------------------------------------------------------------------------------------------------------------------|-----------------------------------------------------|--------------------------------------------------------|--------|
| A. Biogeography/Historical                     |      |                                                                                                                                                                         |                                                     |                                                        |        |
| 1. Domestication/Cultivation                   |      |                                                                                                                                                                         |                                                     |                                                        |        |
| 1                                              | 1.01 | Has the taxon been the subject of domestication (or cultivation) for at least 20 generations?                                                                           | Yes                                                 | FishBase                                               | High   |
| 2                                              | 1.02 | Is the taxon harvested in the wild and likely to be sold or used in its live form?                                                                                      | Yes                                                 | FishBase                                               | High   |
| 3                                              | 1.03 | Does the taxon have invasive races, varieties, sub-taxa or congeners?                                                                                                   | No                                                  | No information found.                                  | Medium |
| 2. Climate, distribution and introduction risk |      |                                                                                                                                                                         |                                                     |                                                        |        |
| 4                                              | 2.01 | How similar are the climatic conditions of the Risk Assessment (RA) area and the taxon's native range?                                                                  | High                                                | Dfa, Dfb (Köppen–Geiger climate classification system) | High   |
| 5                                              | 2.02 | What is the quality of the climate matching data?                                                                                                                       | High                                                | Köppen–Geiger climate classification system            | High   |
| 6                                              | 2.03 | Is the taxon already present outside of captivity in the RA area?                                                                                                       | Yes                                                 | Froese&Pauly (2015)                                    | High   |
| 7                                              | 2.04 | How many potential vectors could the taxon use to enter in the RA area?                                                                                                 | One                                                 | Fisheries                                              | High   |
| 8                                              | 2.05 | Is the taxon currently found in close proximity to, and likely to enter into, the RA area in the near future (e.g. unintentional and intentional introductions)?        | Yes                                                 | Fisheries, intentional stocking                        | High   |
| 3. Invasive elsewhere                          |      |                                                                                                                                                                         |                                                     |                                                        |        |
| 9                                              | 3.01 | Has the taxon become naturalised (established viable populations) outside its native range?                                                                             | No                                                  | cabi.org                                               | High   |
| 10                                             | 3.02 | In the taxon's introduced range, are there known adverse impacts to wild stocks or commercial taxa?                                                                     | No                                                  | No information found.                                  | Medium |
| 11                                             | 3.03 | In the taxon's introduced range, are there known adverse impacts to aquaculture?                                                                                        | No                                                  | No information found.                                  | Low    |
| 12                                             | 3.04 | In the taxon's introduced range, are there known adverse impacts to ecosystem?                                                                                          | No                                                  | No information found.                                  | Low    |
| 13                                             | 3.05 | In the taxon's introduced range, are there known adverse socio-economic impacts?                                                                                        | Yes                                                 | cabi.org                                               | Medium |
| B. Biology/Ecology                             |      |                                                                                                                                                                         |                                                     |                                                        |        |
| 4. Undesirable (or persistence) traits         |      |                                                                                                                                                                         |                                                     |                                                        |        |
| 14                                             | 4.01 | Is it likely that the taxon will be poisonous or pose other risks to human health?                                                                                      | No                                                  | Harmless (FishBase)                                    | High   |
| 15                                             | 4.02 | Is it likely that the taxon will smother one or more native taxa (that are not threatened or protected)?                                                                | Yes                                                 | Sandlund et al. (2011)                                 | High   |
| 16                                             | 4.03 | Are there any threatened or protected taxa that the non-native taxon would parasitise in the RA area?                                                                   | No                                                  | The taxon is not a parasite.                           | High   |
| 17                                             | 4.04 | Is the taxon adaptable in terms of climatic and other environmental conditions, thus enhancing its potential persistence if it has invaded or could invade the RA area? | Yes                                                 | cabi.org                                               | High   |
| 18                                             | 4.05 | Is the taxon likely to disrupt food-web structure/function in aquatic ecosystems if it has invaded or is likely to invade the RA area?                                  | Yes                                                 | Sandlund et al. (2011)                                 | High   |
| 19                                             | 4.06 | Is the taxon likely to exert adverse impacts on ecosystem services in the RA area?                                                                                      | Yes                                                 | cabi.rs                                                | High   |
| 20                                             | 4.07 | Is it likely that the taxon will host, and/or act as a vector for, recognised pests and infectious agents that are endemic in the RA area?                              | No                                                  | No information found.                                  | Medium |
| 21                                             | 4.08 | Is it likely that the taxon will host, and/or act as a vector for, recognised pests and infectious agents that are absent from (novel to) the RA area?                  | Yes                                                 | Skill et al. (2004); Brzuzan et al. (2007)             | High   |
| 22                                             | 4.09 | Is it likely that the taxon will achieve a body size that will make it more likely to be released from captivity?                                                       | No                                                  | No information found.                                  | Medium |
| 23                                             | 4.10 | Is the taxon capable of sustaining itself in a range of water velocity conditions (e.g. versatile in habitat use)?                                                      | Yes                                                 | cabi.org                                               | High   |
| 24                                             | 4.11 | Is it likely that the taxon's mode of existence (e.g. excretion of by-products) or behaviours (e.g. feeding) will reduce habitat quality for native taxa?               | Yes                                                 | Eloranta et al. (2011); Berg et al. (1994)             | High   |
| 25                                             | 4.12 | Is the taxon likely to maintain a viable population even when present in low densities (or persisting in adverse conditions by way of a dormant form)?                  | No                                                  | No information found.                                  | Medium |

|                                 |      |                                                                                                                                                                              |           |                                                                                              |        |
|---------------------------------|------|------------------------------------------------------------------------------------------------------------------------------------------------------------------------------|-----------|----------------------------------------------------------------------------------------------|--------|
| <b>5. Resource exploitation</b> |      |                                                                                                                                                                              |           |                                                                                              |        |
| 26                              | 5.01 | Is the taxon likely to consume threatened or protected native taxa in the RA area?                                                                                           | Yes       | fws.gov                                                                                      | High   |
| 27                              | 5.02 | Is the taxon likely to sequester food resources (including nutrients) to the detriment of native taxa in the RA area?                                                        | Yes       | fws.gov                                                                                      | High   |
| <b>6. Reproduction</b>          |      |                                                                                                                                                                              |           |                                                                                              |        |
| 28                              | 6.01 | Is the taxon likely to exhibit parental care and/or to reduce age-at-maturity in response to environmental conditions?                                                       | No        | No information found.                                                                        | Medium |
| 29                              | 6.02 | Is the taxon likely to produce viable gametes or propagules (in the RA area)?                                                                                                | Yes       | cabi.org                                                                                     | Medium |
| 30                              | 6.03 | Is the taxon likely to hybridise naturally with native taxa?                                                                                                                 | No        | No information found.                                                                        | Medium |
| 31                              | 6.04 | Is the taxon likely to be hermaphroditic or to display asexual reproduction?                                                                                                 | No        | Froese&Pauly (2015)                                                                          | Medium |
| 32                              | 6.05 | Is the taxon dependent on the presence of another taxon (or specific habitat features) to complete its life cycle?                                                           | No        | No information found.                                                                        | Medium |
| 33                              | 6.06 | Is the taxon known (or likely) to produce a large number of propagules or offspring within a short time span (e.g. < 1 year)?                                                | Yes       | Froese&Pauly (2015)                                                                          | High   |
| 34                              | 6.07 | How many time units (days, months, years) does the taxon require to reach the age-at-first-reproduction?                                                                     | 2         | Similar to other Coregonus.                                                                  | Medium |
| <b>7. Dispersal mechanisms</b>  |      |                                                                                                                                                                              |           |                                                                                              |        |
| 35                              | 7.01 | How many potential internal vectors/pathways could the taxon use to disperse within the RA area (with suitable vectors)?                                                     | One       | Intentional stocking.                                                                        | High   |
| 36                              | 7.02 | Will any of these vectors/pathways bring the taxon in close proximity to one or more protected areas (e.g. MCZ, MPA, SSSI)?                                                  | Yes       | Intentional stocking.                                                                        | High   |
| 37                              | 7.03 | Does the taxon have a means of actively attaching itself to hard substrata (e.g. ship hulls, pilings, buoys) such that it enhances the likelihood of dispersal?              | No        | Not known.                                                                                   | High   |
| 38                              | 7.04 | Is natural dispersal of the taxon likely to occur as eggs (for animals) or as propagules (for plants: seeds, spores) in the RA area?                                         | Yes       | Eggs and larvae follow currents and drift downstream in rivers - similar to other Coregonus. | High   |
| 39                              | 7.05 | Is natural dispersal of the taxon likely to occur as larvae/juveniles (for animals) or as fragments/seedlings (for plants) in the RA area?                                   | Yes       | Similar to other Coregonus.                                                                  | High   |
| 40                              | 7.06 | Are older life stages of the taxon likely to migrate in the RA area for reproduction?                                                                                        | No        | No information found.                                                                        | Medium |
| 41                              | 7.07 | Are propagules or eggs of the taxon likely to be dispersed in the RA area by other animals?                                                                                  | No        | cabi.org                                                                                     | Medium |
| 42                              | 7.08 | Is dispersal of the taxon along any of the vectors/pathways mentioned in the previous seven questions (35–41; i.e. both unintentional or intentional) likely to be           | Yes       | Intentional stocking.                                                                        | Medium |
| 43                              | 7.09 | Is dispersal of the taxon density dependent?                                                                                                                                 | No        | No information found.                                                                        | Medium |
| <b>8. Tolerance attributes</b>  |      |                                                                                                                                                                              |           |                                                                                              |        |
| 44                              | 8.01 | Is the taxon able to withstand being out of water for extended periods (e.g. minimum of one or more hours) at some stage of its life cycle?                                  | No        | The taxon can not survive out of water.                                                      | High   |
| 45                              | 8.02 | Is the taxon tolerant of a wide range of water quality conditions relevant to that taxon? [In the Justification field, indicate the relevant water quality variable(s) being | Yes       | cabi.org                                                                                     | Medium |
| 46                              | 8.03 | Can the taxon be controlled or eradicated in the wild with chemical, biological, or other agents/means?                                                                      | No        | No information found.                                                                        | Medium |
| 47                              | 8.04 | Is the taxon likely to tolerate or benefit from environmental/human disturbance?                                                                                             | No        | cabi.org                                                                                     | Medium |
| 48                              | 8.05 | Is the taxon able to tolerate salinity levels that are higher or lower than those found in its usual environment?                                                            | Yes       | cabi.org                                                                                     | High   |
| 49                              | 8.06 | Are there effective natural enemies (predators) of the taxon present in the RA                                                                                               | No        | No information found.                                                                        | Medium |
| <b>C. Climate change</b>        |      |                                                                                                                                                                              |           |                                                                                              |        |
| <b>9. Climate change</b>        |      |                                                                                                                                                                              |           |                                                                                              |        |
| 50                              | 9.01 | Under the predicted future climatic conditions, are the risks of entry into the RA area posed by the taxon likely to increase, decrease or not change?                       | No change | Adaptable to different environments - similar to other Coregonus.                            | Medium |
| 51                              | 9.02 | Under the predicted future climatic conditions, are the risks of establishment posed by the taxon likely to increase, decrease or not change?                                | No change | Adaptable to different environments - similar to other Coregonus.                            | Medium |
| 52                              | 9.03 | Under the predicted future climatic conditions, are the risks of dispersal within the RA area posed by the taxon likely to increase, decrease or not change?                 | No change | Adaptable to different environments - similar to other Coregonus.                            | Medium |
| 53                              | 9.04 | Under the predicted future climatic conditions, what is the likely magnitude of future potential impacts on biodiversity and/or ecological integrity/status?                 | No change | Adaptable to different environments - similar to other Coregonus.                            | Medium |

|    |      |                                                                                                                                                        |           |                                                                   |        |
|----|------|--------------------------------------------------------------------------------------------------------------------------------------------------------|-----------|-------------------------------------------------------------------|--------|
| 54 | 9.05 | Under the predicted future climatic conditions, what is the likely magnitude of future potential impacts on ecosystem structure and/or function?       | No change | Adaptable to different environments - similar to other Coregonus. | Medium |
| 55 | 9.06 | Under the predicted future climatic conditions, what is the likely magnitude of future potential impacts on ecosystem services/socio-economic factors? | No change | Adaptable to different environments - similar to other Coregonus. | Medium |

| Statistics                                     |             |
|------------------------------------------------|-------------|
| Scores                                         |             |
| <b>BRA</b>                                     | <b>24.0</b> |
| <b>BRA Outcome</b>                             | <b>-</b>    |
| <b>BRA+CCA</b>                                 | <b>24.0</b> |
| <b>BRA+CCA Outcome</b>                         | <b>-</b>    |
| Score partition                                |             |
| <b>A. Biogeography/Historical</b>              | <b>5.0</b>  |
| 1. Domestication/Cultivation                   | 2.0         |
| 2. Climate, distribution and introduction risk | 1.0         |
| 3. Invasive elsewhere                          | 2.0         |
| <b>B. Biology/Ecology</b>                      | <b>19.0</b> |
| 4. Undesirable (or persistence) traits         | 7.0         |
| 5. Resource exploitation                       | 7.0         |
| 6. Reproduction                                | 1.0         |
| 7. Dispersal mechanisms                        | 1.0         |
| 8. Tolerance attributes                        | 3.0         |
| <b>C. Climate change</b>                       | <b>0.0</b>  |
| 9. Climate change                              | 0.0         |
| Answered Questions                             |             |
| <b>Total</b>                                   | <b>55</b>   |
| <b>A. Biogeography/Historical</b>              | <b>13</b>   |
| 1. Domestication/Cultivation                   | 3           |
| 2. Climate, distribution and introduction risk | 5           |
| 3. Invasive elsewhere                          | 5           |
| <b>B. Biology/Ecology</b>                      | <b>36</b>   |
| 4. Undesirable (or persistence) traits         | 12          |
| 5. Resource exploitation                       | 2           |
| 6. Reproduction                                | 7           |
| 7. Dispersal mechanisms                        | 9           |
| 8. Tolerance attributes                        | 6           |
| <b>C. Climate change</b>                       | <b>6</b>    |
| 9. Climate change                              | 6           |
| Sectors affected                               |             |
| <b>Commercial</b>                              | <b>9</b>    |
| <b>Environmental</b>                           | <b>9</b>    |
| <b>Species or population nuisance traits</b>   | <b>9</b>    |

| Thresholds     |             |
|----------------|-------------|
| <b>BRA</b>     | <b>-</b>    |
| <b>BRA+CCA</b> | <b>-</b>    |
| Confidence     |             |
| <b>BRA+CCA</b> | <b>0.61</b> |
| <b>BRA</b>     | <b>0.63</b> |
| <b>CCA</b>     | <b>0.50</b> |

| Date and Time       |  |
|---------------------|--|
| 03/06/2021 23:57:03 |  |

## AS-ISK v2

| Taxon and Assessor details         |                                         |
|------------------------------------|-----------------------------------------|
| Category                           | Fishes and Lampreys (freshwater)        |
| Taxon name                         | <i>Coregonus lavaretus</i>              |
| Common name                        | European whitefish                      |
| Assessor                           | Tena Radocaj                            |
| Risk screening context             |                                         |
| Reason and socio-economic benefits |                                         |
| Risk assessment area               | Danube & Adriatic basins BA, HR, ME, RS |
| Taxonomy                           |                                         |
| Native range                       |                                         |
| Introduced range                   |                                         |
| URL                                |                                         |

|                                                |      | Response                                                                                                                                                                | Justification (references and/or other information) | Confidence                                                                                                                                                                                                                                                                                                                                                                                                                                                                                                                                                                                                                                         |           |
|------------------------------------------------|------|-------------------------------------------------------------------------------------------------------------------------------------------------------------------------|-----------------------------------------------------|----------------------------------------------------------------------------------------------------------------------------------------------------------------------------------------------------------------------------------------------------------------------------------------------------------------------------------------------------------------------------------------------------------------------------------------------------------------------------------------------------------------------------------------------------------------------------------------------------------------------------------------------------|-----------|
| A. Biogeography/Historical                     |      |                                                                                                                                                                         |                                                     |                                                                                                                                                                                                                                                                                                                                                                                                                                                                                                                                                                                                                                                    |           |
| 1. Domestication/Cultivation                   |      |                                                                                                                                                                         |                                                     |                                                                                                                                                                                                                                                                                                                                                                                                                                                                                                                                                                                                                                                    |           |
| 1                                              | 1.01 | Has the taxon been the subject of domestication (or cultivation) for at least 20 generations?                                                                           | No                                                  | Habeković 1978; succesfully introduced 1977 in Croatia.                                                                                                                                                                                                                                                                                                                                                                                                                                                                                                                                                                                            | Very high |
| 2                                              | 1.02 | Is the taxon harvested in the wild and likely to be sold or used in its live form?                                                                                      | Yes                                                 | This species is grown for human consummation and as a food source, whitefish is an appreciated and valuable freshwater fish species is caught in nature. (Vielma, J., Koskela, J., Ruohonen, K., Jokinen, I., & Kettunen, J. (2003). Optimal diet composition for European whitefish (Coregonus lavaretus): carbohydrate stress and immune parameter responses. Aquaculture, 225(1-4), 3-16.) (Orban, E., Masci, M., Nevigato, T., Di Lena, G., Casini, I., Caproni, R., & Rampacci, M. (2006). Nutritional quality and safety of whitefish (Coregonus lavaretus) from Italian lakes. Journal of Food Composition and Analysis. 19(6-7). 737-746.) | Very high |
| 3                                              | 1.03 | Does the taxon have invasive races, varieties, sub-taxa or congeners?                                                                                                   | No                                                  | There is no invasive subspecies as I know; I didn't find any data                                                                                                                                                                                                                                                                                                                                                                                                                                                                                                                                                                                  | Very high |
| 2. Climate, distribution and introduction risk |      |                                                                                                                                                                         |                                                     |                                                                                                                                                                                                                                                                                                                                                                                                                                                                                                                                                                                                                                                    |           |
| 4                                              | 2.01 | How similar are the climatic conditions of the Risk Assessment (RA) area and the taxon's native range?                                                                  | Medium                                              | The similarity between climatic conditions RA area and native range is medium. I use climatch.                                                                                                                                                                                                                                                                                                                                                                                                                                                                                                                                                     | Medium    |
| 5                                              | 2.02 | What is the quality of the climate matching data?                                                                                                                       | Medium                                              | The quality of the climate matching data is medium.                                                                                                                                                                                                                                                                                                                                                                                                                                                                                                                                                                                                | Medium    |
| 6                                              | 2.03 | Is the taxon already present outside of captivity in the RA area?                                                                                                       | Yes                                                 | This species is present outside of captivity in RA area                                                                                                                                                                                                                                                                                                                                                                                                                                                                                                                                                                                            | Very high |
| 7                                              | 2.04 | How many potential vectors could the taxon use to enter in the RA area?                                                                                                 | None                                                | It is present in Croatia                                                                                                                                                                                                                                                                                                                                                                                                                                                                                                                                                                                                                           | Very high |
| 8                                              | 2.05 | Is the taxon currently found in close proximity to, and likely to enter into, the RA area in the near future (e.g. unintentional and intentional introductions)?        | Not applicable                                      | not applicable                                                                                                                                                                                                                                                                                                                                                                                                                                                                                                                                                                                                                                     | Very high |
| 3. Invasive elsewhere                          |      |                                                                                                                                                                         |                                                     |                                                                                                                                                                                                                                                                                                                                                                                                                                                                                                                                                                                                                                                    |           |
| 9                                              | 3.01 | Has the taxon become naturalised (established viable populations) outside its                                                                                           | Yes                                                 | Simonović, 2012                                                                                                                                                                                                                                                                                                                                                                                                                                                                                                                                                                                                                                    | Very high |
| 10                                             | 3.02 | In the taxon's introduced range, are there known adverse impacts to wild stocks or commercial taxa?                                                                     | No                                                  | no documented evidence                                                                                                                                                                                                                                                                                                                                                                                                                                                                                                                                                                                                                             | Medium    |
| 11                                             | 3.03 | In the taxon's introduced range, are there known adverse impacts to aquaculture?                                                                                        | No                                                  | no documented evidence                                                                                                                                                                                                                                                                                                                                                                                                                                                                                                                                                                                                                             | Medium    |
| 12                                             | 3.04 | In the taxon's introduced range, are there known adverse impacts to ecosystem services?                                                                                 | No                                                  | It is stated that in introduced area no negative impacts (Jevtić (1991) Izbor ozimice za otvorene i zatvorene vode. Ribarstvo Jugoslavije 46:14-26.) but without any research                                                                                                                                                                                                                                                                                                                                                                                                                                                                      | Medium    |
| 13                                             | 3.05 | In the taxon's introduced range, are there known adverse socio-economic impacts?                                                                                        | No                                                  | Personal opinion                                                                                                                                                                                                                                                                                                                                                                                                                                                                                                                                                                                                                                   | Medium    |
| B. Biology/Ecology                             |      |                                                                                                                                                                         |                                                     |                                                                                                                                                                                                                                                                                                                                                                                                                                                                                                                                                                                                                                                    |           |
| 4. Undesirable (or persistence) traits         |      |                                                                                                                                                                         |                                                     |                                                                                                                                                                                                                                                                                                                                                                                                                                                                                                                                                                                                                                                    |           |
| 14                                             | 4.01 | Is it likely that the taxon will be poisonous or pose other risks to human health?                                                                                      | No                                                  | Jevtić (1991) Izbor ozimice za otvorene i zatvorene vode. Ribarstvo Jugoslavije 46:14-26.                                                                                                                                                                                                                                                                                                                                                                                                                                                                                                                                                          | Very high |
| 15                                             | 4.02 | Is it likely that the taxon will smother one or more native taxa (that are not threatened or protected)?                                                                | No                                                  | Also is stated that there is no competition with native species without research (Jevtić (1991) Izbor ozimice za otvorene i zatvorene vode. Ribarstvo Jugoslavije 46:14-26.)                                                                                                                                                                                                                                                                                                                                                                                                                                                                       | Low       |
| 16                                             | 4.03 | Are there any threatened or protected taxa that the non-native taxon would parasitise in the RA area?                                                                   | No                                                  | Jevtić (1991) Izbor ozimice za otvorene i zatvorene vode. Ribarstvo Jugoslavije 46:14-26.                                                                                                                                                                                                                                                                                                                                                                                                                                                                                                                                                          | Very high |
| 17                                             | 4.04 | Is the taxon adaptable in terms of climatic and other environmental conditions, thus enhancing its potential persistence if it has invaded or could invade the RA area? | Yes                                                 | Yes, this taxon is adapted on climate and environmental conditions, these species have self-sustaining populations in RA area. (Jevtić (1991) Izbor ozimice za otvorene i zatvorene vode. Ribarstvo Jugoslavije 46:14-26)                                                                                                                                                                                                                                                                                                                                                                                                                          | Medium    |
| 18                                             | 4.05 | Is the taxon likely to disrupt food-web structure/function in aquatic ecosystems if it has invaded or is likely to invade the RA                                        | Yes                                                 | Maybe, it is possible there is a possibility that it will disrupt the nutritional structure, and reduce the abundance of benthic invertebrates.                                                                                                                                                                                                                                                                                                                                                                                                                                                                                                    | Low       |
| 19                                             | 4.06 | Is the taxon likely to exert adverse impacts on ecosystem services in the RA area?                                                                                      | No                                                  | My personal opinion is no                                                                                                                                                                                                                                                                                                                                                                                                                                                                                                                                                                                                                          | Low       |
| 20                                             | 4.07 | Is it likely that the taxon will host, and/or act as a vector for, recognised pests and infectious agents that are endemic in the RA                                    | Yes                                                 | Yes, the taxon may be a host or vector of known pests and infectious agents endemic to RA area. Because in every area exist infectious agents and pests.                                                                                                                                                                                                                                                                                                                                                                                                                                                                                           | Low       |

|                                 |      |                                                                                                                                                                              |                |                                                                                                                                                                                                                                                                                                                                                                                                                                                                                                                                                                                                                                                                                                           |           |
|---------------------------------|------|------------------------------------------------------------------------------------------------------------------------------------------------------------------------------|----------------|-----------------------------------------------------------------------------------------------------------------------------------------------------------------------------------------------------------------------------------------------------------------------------------------------------------------------------------------------------------------------------------------------------------------------------------------------------------------------------------------------------------------------------------------------------------------------------------------------------------------------------------------------------------------------------------------------------------|-----------|
| 21                              | 4.08 | Is it likely that the taxon will host, and/or act as a vector for, recognised pests and infectious agents that are absent from (novel to) the RA area?                       | Yes            | Whitefish are potential carriers of VHSV [viral haemorrhagic septicaemia virus] as they suffer only low mortality after infection but continue to carry virus, Bacterial kidney disease ... Renibacterium salmoninarum. (Skall, H. F., T. E. Kjær, and N. J. Olesen. 2004. Investigation of wild caught whitefish, Coregonus lavaretus (L.), for infection with viral haemorrhagic septicaemia virus (VHSV) and experimental challenge of whitefish with VHSV. Journal of Fish Diseases 27(7):401-408.) (Rimaila-Pärnänen, E. 2002. First case of bacterial kidney disease (BKD) in whitefish (Coregonus lavaretus) in Finland. Bulletin of the European Association of Fish Pathologists 22(6):403-404.) | Medium    |
| 22                              | 4.09 | Is it likely that the taxon will achieve a body size that will make it more likely to be released from captivity?                                                            | Yes            | In introduced lake: 50 cm TL (Jevtić (1991) Izbor ozimice za otvorene i zatvorene vode. Ribarstvo Jugoslavije 46:14-26.)                                                                                                                                                                                                                                                                                                                                                                                                                                                                                                                                                                                  | Very high |
| 23                              | 4.10 | Is the taxon capable of sustaining itself in a range of water velocity conditions (e.g. versatile in habitat use)?                                                           | Yes            | Jevtić (1991) Izbor ozimice za otvorene i zatvorene vode. Ribarstvo Jugoslavije 46:14-26.                                                                                                                                                                                                                                                                                                                                                                                                                                                                                                                                                                                                                 | Very high |
| 24                              | 4.11 | Is it likely that the taxon's mode of existence (e.g. excretion of by-products) or behaviours (e.g. feeding) will reduce habitat quality for native taxa?                    | Yes            | It is written that there is no impact but without research (Jevtić (1991) Izbor ozimice za otvorene i zatvorene vode. Ribarstvo Jugoslavije 46:14-26.)                                                                                                                                                                                                                                                                                                                                                                                                                                                                                                                                                    | High      |
| 25                              | 4.12 | Is the taxon likely to maintain a viable population even when present in low densities (or persisting in adverse conditions by way of a dormant form)?                       | No             | Introduction to one area with low number of specimens wasn't succesful (Habeković, 1978)                                                                                                                                                                                                                                                                                                                                                                                                                                                                                                                                                                                                                  | Very high |
| <b>5. Resource exploitation</b> |      |                                                                                                                                                                              |                |                                                                                                                                                                                                                                                                                                                                                                                                                                                                                                                                                                                                                                                                                                           |           |
| 26                              | 5.01 | Is the taxon likely to consume threatened or protected native taxa in the RA area?                                                                                           | Yes            | It is possible that it consume endangered and protected native taxa in the RA area. If there are protected taxa in the RA area, the european whitefish will consume them, whether or not the taxon                                                                                                                                                                                                                                                                                                                                                                                                                                                                                                        | Low       |
| 27                              | 5.02 | Is the taxon likely to sequester food resources (including nutrients) to the detriment of native taxa in the RA area?                                                        | Not applicable | not applicable                                                                                                                                                                                                                                                                                                                                                                                                                                                                                                                                                                                                                                                                                            | Very high |
| <b>6. Reproduction</b>          |      |                                                                                                                                                                              |                |                                                                                                                                                                                                                                                                                                                                                                                                                                                                                                                                                                                                                                                                                                           |           |
| 28                              | 6.01 | Is the taxon likely to exhibit parental care and/or to reduce age-at-maturity in response to environmental conditions?                                                       | No             | Jevtić (1991) Izbor ozimice za otvorene i zatvorene vode. Ribarstvo Jugoslavije 46:14-26.                                                                                                                                                                                                                                                                                                                                                                                                                                                                                                                                                                                                                 | Very high |
| 29                              | 6.02 | Is the taxon likely to produce viable gametes or propagules (in the RA area)?                                                                                                | Yes            | Jevtić (1991) Izbor ozimice za otvorene i zatvorene vode. Ribarstvo Jugoslavije 46:14-26.                                                                                                                                                                                                                                                                                                                                                                                                                                                                                                                                                                                                                 | Very high |
| 30                              | 6.03 | Is the taxon likely to hybridise naturally with native taxa?                                                                                                                 | No             | Jevtić (1991) Izbor ozimice za otvorene i zatvorene vode. Ribarstvo Jugoslavije 46:14-26.                                                                                                                                                                                                                                                                                                                                                                                                                                                                                                                                                                                                                 | Medium    |
| 31                              | 6.04 | Is the taxon likely to be hermaphroditic or to display asexual reproduction?                                                                                                 | No             | Jevtić (1991) Izbor ozimice za otvorene i zatvorene vode. Ribarstvo Jugoslavije 46:14-26.                                                                                                                                                                                                                                                                                                                                                                                                                                                                                                                                                                                                                 | Very high |
| 32                              | 6.05 | Is the taxon dependent on the presence of another taxon (or specific habitat features) to complete its life cycle?                                                           | No             | Jevtić (1991) Izbor ozimice za otvorene i zatvorene vode. Ribarstvo Jugoslavije 46:14-26.                                                                                                                                                                                                                                                                                                                                                                                                                                                                                                                                                                                                                 | Very high |
| 33                              | 6.06 | Is the taxon known (or likely) to produce a large number of propagules or offspring within a short time span (e.g. < 1 year)?                                                | Yes            | 30 000-50000. (Jevtić (1991) Izbor ozimice za otvorene i zatvorene vode. Ribarstvo Jugoslavije 46:14-26).                                                                                                                                                                                                                                                                                                                                                                                                                                                                                                                                                                                                 | Very high |
| 34                              | 6.07 | How many time units (days, months, years) does the taxon require to reach the age-at-first-reproduction?                                                                     | 2              | In the second year of life it reaches sexual maturity. (Orban, E., Masci, M., Nevigato, T., Di Lena, G., Casini, I., Caproni, R., ... & Rampacci, M. (2006). Nutritional quality and safety of whitefish (Coregonus lavaretus) from Italian lakes. Journal of Food Composition and Analysis, 19(6-7), 737-746.)                                                                                                                                                                                                                                                                                                                                                                                           | Very high |
| <b>7. Dispersal mechanisms</b>  |      |                                                                                                                                                                              |                |                                                                                                                                                                                                                                                                                                                                                                                                                                                                                                                                                                                                                                                                                                           |           |
| 35                              | 7.01 | How many potential internal vectors/pathways could the taxon use to disperse within the RA area (with suitable vectors/pathways)?                                            | >1             | 1. accidental introduction, 2. human-mediated 3. natural spread via natural and manmade watercourses                                                                                                                                                                                                                                                                                                                                                                                                                                                                                                                                                                                                      | Medium    |
| 36                              | 7.02 | Will any of these vectors/pathways bring the taxon in close proximity to one or more protected areas (e.g. MCZ, MPA, SSSI)?                                                  | Yes            | This species is present in protected area in Croatia                                                                                                                                                                                                                                                                                                                                                                                                                                                                                                                                                                                                                                                      | Low       |
| 37                              | 7.03 | Does the taxon have a means of actively attaching itself to hard substrata (e.g. ship hulls, pilings, buoys) such that it enhances the likelihood of dispersal?              | No             | personal opinion                                                                                                                                                                                                                                                                                                                                                                                                                                                                                                                                                                                                                                                                                          | Low       |
| 38                              | 7.04 | Is natural dispersal of the taxon likely to occur as eggs (for animals) or as propagules (for plants: seeds, spores) in the RA area?                                         | No             | Jevtić (1991) Izbor ozimice za otvorene i zatvorene vode. Ribarstvo Jugoslavije 46:14-26.                                                                                                                                                                                                                                                                                                                                                                                                                                                                                                                                                                                                                 | Low       |
| 39                              | 7.05 | Is natural dispersal of the taxon likely to occur as larvae/juveniles (for animals) or as fragments/seedlings (for plants) in the RA area?                                   | Yes            | Jevtić (1991) Izbor ozimice za otvorene i zatvorene vode. Ribarstvo Jugoslavije 46:14-26.                                                                                                                                                                                                                                                                                                                                                                                                                                                                                                                                                                                                                 | High      |
| 40                              | 7.06 | Are older life stages of the taxon likely to migrate in the RA area for reproduction?                                                                                        | Yes            | No documented data                                                                                                                                                                                                                                                                                                                                                                                                                                                                                                                                                                                                                                                                                        | High      |
| 41                              | 7.07 | Are propagules or eggs of the taxon likely to be dispersed in the RA area by other animals?                                                                                  | No             | Personal opinion                                                                                                                                                                                                                                                                                                                                                                                                                                                                                                                                                                                                                                                                                          | Very high |
| 42                              | 7.08 | Is dispersal of the taxon along any of the vectors/pathways mentioned in the previous seven questions (35-41; i.e. both unintentional or intentional) likely to be           | Yes            | There is a possibility of a high rate of spread of taxa. Eg. if a fertilized individual enters a new area by any means of expansion.                                                                                                                                                                                                                                                                                                                                                                                                                                                                                                                                                                      | Low       |
| 43                              | 7.09 | Is dispersal of the taxon density dependent?                                                                                                                                 | No             | no documented data                                                                                                                                                                                                                                                                                                                                                                                                                                                                                                                                                                                                                                                                                        | High      |
| <b>8. Tolerance attributes</b>  |      |                                                                                                                                                                              |                |                                                                                                                                                                                                                                                                                                                                                                                                                                                                                                                                                                                                                                                                                                           |           |
| 44                              | 8.01 | Is the taxon able to withstand being out of water for extended periods (e.g. minimum of one or more hours) at some stage of its life cycle?                                  | No             | Personal opinion                                                                                                                                                                                                                                                                                                                                                                                                                                                                                                                                                                                                                                                                                          | Very high |
| 45                              | 8.02 | Is the taxon tolerant of a wide range of water quality conditions relevant to that taxon? [In the Justification field, indicate the relevant water quality variable(s) being | No             | Can't survive in extremes                                                                                                                                                                                                                                                                                                                                                                                                                                                                                                                                                                                                                                                                                 | Very high |



|                          |      |                                                                                                                                                              |                |                                                                                                                                                                                                                                                                          |           |
|--------------------------|------|--------------------------------------------------------------------------------------------------------------------------------------------------------------|----------------|--------------------------------------------------------------------------------------------------------------------------------------------------------------------------------------------------------------------------------------------------------------------------|-----------|
| 46                       | 8.03 | Can the taxon be controlled or eradicated in the wild with chemical, biological, or other agents/means?                                                      | Not applicable | No regulation in Croatia as I know                                                                                                                                                                                                                                       | Very high |
| 47                       | 8.04 | Is the taxon likely to tolerate or benefit from environmental/human disturbance?                                                                             | No             | Personal opinion                                                                                                                                                                                                                                                         | Very high |
| 48                       | 8.05 | Is the taxon able to tolerate salinity levels that are higher or lower than those found in its usual environment?                                            | No             | Freshwater species                                                                                                                                                                                                                                                       | Very high |
| 49                       | 8.06 | Are there effective natural enemies (predators) of the taxon present in the RA                                                                               | No             | no known enemies in RA area                                                                                                                                                                                                                                              | Low       |
| <b>C. Climate change</b> |      |                                                                                                                                                              |                |                                                                                                                                                                                                                                                                          |           |
| <b>9. Climate change</b> |      |                                                                                                                                                              |                |                                                                                                                                                                                                                                                                          |           |
| 50                       | 9.01 | Under the predicted future climatic conditions, are the risks of entry into the RA area posed by the taxon likely to increase, decrease or not change?       | Not applicable | not applicable                                                                                                                                                                                                                                                           | Very high |
| 51                       | 9.02 | Under the predicted future climatic conditions, are the risks of establishment posed by the taxon likely to increase, decrease or not change?                | Decrease       | Considering climate change, population in the RA area is likely to decline, as this species does not tolerate high temperatures.                                                                                                                                         | Medium    |
| 52                       | 9.03 | Under the predicted future climatic conditions, are the risks of dispersal within the RA area posed by the taxon likely to increase, decrease or not change? | Decrease       | The risk of taxa spreading in the RA area is declining, currently this species in Croatia resides in only one reservoir, I believe that under the influence of climate change it will not spread further, but its number will decline due to differences in temperature. | Medium    |
| 53                       | 9.04 | Under the predicted future climatic conditions, what is the likely magnitude of future potential impacts on biodiversity and/or ecological integrity/status? | No change      | no                                                                                                                                                                                                                                                                       | Low       |
| 54                       | 9.05 | Under the predicted future climatic conditions, what is the likely magnitude of future potential impacts on ecosystem structure and/or function?             | No change      | Personal opinion, no impact                                                                                                                                                                                                                                              | Medium    |
| 55                       | 9.06 | Under the predicted future climatic conditions, what is the likely magnitude of future potential impacts on ecosystem services/socio-economic factors?       | No change      | No impact                                                                                                                                                                                                                                                                | Medium    |

| Statistics                                     |             |
|------------------------------------------------|-------------|
| Scores                                         |             |
| <b>BRA</b>                                     | <b>14.5</b> |
| <b>BRA Outcome</b>                             | <b>-</b>    |
| <b>BRA+CCA</b>                                 | <b>10.5</b> |
| <b>BRA+CCA Outcome</b>                         | <b>-</b>    |
| Score partition                                |             |
| <b>A. Biogeography/Historical</b>              | <b>1.5</b>  |
| 1. Domestication/Cultivation                   | 0.0         |
| 2. Climate, distribution and introduction risk | 0.0         |
| 3. Invasive elsewhere                          | 1.5         |
| <b>B. Biology/Ecology</b>                      | <b>13.0</b> |
| 4. Undesirable (or persistence) traits         | 7.0         |
| 5. Resource exploitation                       | 5.0         |
| 6. Reproduction                                | 1.0         |
| 7. Dispersal mechanisms                        | 2.0         |
| 8. Tolerance attributes                        | -2.0        |
| <b>C. Climate change</b>                       | <b>-4.0</b> |
| 9. Climate change                              | -4.0        |
| Answered Questions                             |             |
| <b>Total</b>                                   | <b>55</b>   |
| <b>A. Biogeography/Historical</b>              | <b>13</b>   |
| 1. Domestication/Cultivation                   | 3           |
| 2. Climate, distribution and introduction risk | 5           |
| 3. Invasive elsewhere                          | 5           |
| <b>B. Biology/Ecology</b>                      | <b>36</b>   |
| 4. Undesirable (or persistence) traits         | 12          |
| 5. Resource exploitation                       | 2           |
| 6. Reproduction                                | 7           |
| 7. Dispersal mechanisms                        | 9           |
| 8. Tolerance attributes                        | 6           |
| <b>C. Climate change</b>                       | <b>6</b>    |
| 9. Climate change                              | 6           |
| Sectors affected                               |             |
| <b>Commercial</b>                              | <b>3</b>    |
| <b>Environmental</b>                           | <b>8</b>    |
| <b>Species or population nuisance traits</b>   | <b>3</b>    |

| Thresholds     |             |
|----------------|-------------|
| <b>BRA</b>     | <b>-</b>    |
| <b>BRA+CCA</b> | <b>-</b>    |
| Confidence     |             |
| <b>BRA+CCA</b> | <b>0.70</b> |
| <b>BRA</b>     | <b>0.72</b> |
| <b>CCA</b>     | <b>0.54</b> |

| Date and Time       |  |
|---------------------|--|
| 01/06/2020 10:34:50 |  |

## AS-ISK v2

| Taxon and Assessor details         |                                         |
|------------------------------------|-----------------------------------------|
| Category                           | Fishes and Lampreys (freshwater)        |
| Taxon name                         | <i>Coregonus peled</i>                  |
| Common name                        | peled                                   |
| Assessor                           | Ana Marić                               |
| Risk screening context             |                                         |
| Reason and socio-economic benefits |                                         |
| Risk assessment area               | Danube & Adriatic basins BA, HR, ME, RS |
| Taxonomy                           |                                         |
| Native range                       |                                         |
| Introduced range                   |                                         |
| URL                                |                                         |

|                                                |      | Response                                                                                                                                                                | Justification (references and/or other information) | Confidence                                                                                                                                                                                                                                                                                                                                                                                  |           |
|------------------------------------------------|------|-------------------------------------------------------------------------------------------------------------------------------------------------------------------------|-----------------------------------------------------|---------------------------------------------------------------------------------------------------------------------------------------------------------------------------------------------------------------------------------------------------------------------------------------------------------------------------------------------------------------------------------------------|-----------|
| A. Biogeography/Historical                     |      |                                                                                                                                                                         |                                                     |                                                                                                                                                                                                                                                                                                                                                                                             |           |
| 1. Domestication/Cultivation                   |      |                                                                                                                                                                         |                                                     |                                                                                                                                                                                                                                                                                                                                                                                             |           |
| 1                                              | 1.01 | Has the taxon been the subject of domestication (or cultivation) for at least 20 generations?                                                                           | Yes                                                 | Occurrence of Yersinia ruckeri infection in farmed whitefish, Coregonus peled Gmelin and Coregonus muksun Pallas, and Atlantic salmon, Salmo salar L., in northern Finland. Rintamäki et                                                                                                                                                                                                    | Very high |
| 2                                              | 1.02 | Is the taxon harvested in the wild and likely to be sold or used in its live form?                                                                                      | Yes                                                 | Habekovic. Introdukcija koregonusa u nase vode. 1972                                                                                                                                                                                                                                                                                                                                        | Very high |
| 3                                              | 1.03 | Does the taxon have invasive races, varieties, sub-taxa or congeners?                                                                                                   | Yes                                                 | Coregonus albula                                                                                                                                                                                                                                                                                                                                                                            | Very high |
| 2. Climate, distribution and introduction risk |      |                                                                                                                                                                         |                                                     |                                                                                                                                                                                                                                                                                                                                                                                             |           |
| 4                                              | 2.01 | How similar are the climatic conditions of the Risk Assessment (RA) area and the taxon's native range?                                                                  | Medium                                              | Russia north                                                                                                                                                                                                                                                                                                                                                                                | High      |
| 5                                              | 2.02 | What is the quality of the climate matching data?                                                                                                                       | Medium                                              | Logical                                                                                                                                                                                                                                                                                                                                                                                     | Very high |
| 6                                              | 2.03 | Is the taxon already present outside of captivity in the RA area?                                                                                                       | Yes                                                 | Habekovic. Introdukcija koregonusa u nase vode. 1972                                                                                                                                                                                                                                                                                                                                        | High      |
| 7                                              | 2.04 | How many potential vectors could the taxon use to enter in the RA area?                                                                                                 | One                                                 | Habekovic. Introdukcija koregonusa u nase vode. 1972                                                                                                                                                                                                                                                                                                                                        | Very high |
| 8                                              | 2.05 | Is the taxon currently found in close proximity to, and likely to enter into, the RA area in the near future (e.g. unintentional and intentional introductions)?        | Yes                                                 | Habekovic. Introdukcija koregonusa u nase vode. 1972                                                                                                                                                                                                                                                                                                                                        | Very high |
| 3. Invasive elsewhere                          |      |                                                                                                                                                                         |                                                     |                                                                                                                                                                                                                                                                                                                                                                                             |           |
| 9                                              | 3.01 | Has the taxon become naturalised (established viable populations) outside its native range?                                                                             | Yes                                                 | FRESHWATER ALIEN FISH SPECIES INTRODUCED INTO CROATIA FOR AQUACULTURE AND CONSEQUENCES OF THEIR ESCAPES AND RELEASES IN INLAND WATERS Marina Piria1*, Divna Lukia1, Tatjana Boroša-Pecigoš. 2016                                                                                                                                                                                            | Very high |
| 10                                             | 3.02 | In the taxon's introduced range, are there known adverse impacts to wild stocks or commercial taxa?                                                                     | Yes                                                 | Native vendace (Coregonus albula) and alien peled (C. peled): genetic comparison and introgressive hybridization. Borovikova, E et al. 2016 Introgressive hybridization of the introduced peled (Coregonus peled) with the native whitefish (Coregonus lavaretus) threatens indigenous coregonid populations: a case study. Author(s) : Luczynski, M. ; Mamcarz, A. ; Brzuzan, P. ; Demska- | Very high |
| 11                                             | 3.03 | In the taxon's introduced range, are there known adverse impacts to aquaculture?                                                                                        | No                                                  | https://www.luontoportti.com/suomi/en/kalat/peled                                                                                                                                                                                                                                                                                                                                           | High      |
| 12                                             | 3.04 | In the taxon's introduced range, are there known adverse impacts to ecosystem                                                                                           | No                                                  | https://www.luontoportti.com/suomi/en/kalat/peled                                                                                                                                                                                                                                                                                                                                           | High      |
| 13                                             | 3.05 | In the taxon's introduced range, are there known adverse socio-economic impacts?                                                                                        | No                                                  | https://www.luontoportti.com/suomi/en/kalat/peled                                                                                                                                                                                                                                                                                                                                           | High      |
| B. Biology/Ecology                             |      |                                                                                                                                                                         |                                                     |                                                                                                                                                                                                                                                                                                                                                                                             |           |
| 4. Undesirable (or persistence) traits         |      |                                                                                                                                                                         |                                                     |                                                                                                                                                                                                                                                                                                                                                                                             |           |
| 14                                             | 4.01 | Is it likely that the taxon will be poisonous or pose other risks to human health?                                                                                      | No                                                  | https://www.fishbase.se/summary/Coregonus-peled.html                                                                                                                                                                                                                                                                                                                                        | Very high |
| 15                                             | 4.02 | Is it likely that the taxon will smother one or more native taxa (that are not threatened or protected)?                                                                | No                                                  | https://www.fishbase.se/summary/Coregonus-peled.html                                                                                                                                                                                                                                                                                                                                        | High      |
| 16                                             | 4.03 | Are there any threatened or protected taxa that the non-native taxon would parasitise in the RA area?                                                                   | No                                                  | https://www.fishbase.se/summary/Coregonus-peled.html                                                                                                                                                                                                                                                                                                                                        | Very high |
| 17                                             | 4.04 | Is the taxon adaptable in terms of climatic and other environmental conditions, thus enhancing its potential persistence if it has invaded or could invade the RA area? | No                                                  | https://www.luontoportti.com/suomi/en/kalat/peled                                                                                                                                                                                                                                                                                                                                           | High      |
| 18                                             | 4.05 | Is the taxon likely to disrupt food-web structure/function in aquatic ecosystems if it has invaded or is likely to invade the RA                                        | Yes                                                 | Ecological succession in mountain lake ecosystems of Southern Siberia after the introduction of the peled – Coregonus peled (Gmel, 1778) V. K. Popkov. 2017                                                                                                                                                                                                                                 | High      |
| 19                                             | 4.06 | Is the taxon likely to exert adverse impacts on ecosystem services in the RA area?                                                                                      | No                                                  | https://www.luontoportti.com/suomi/en/kalat/peled                                                                                                                                                                                                                                                                                                                                           | Very high |
| 20                                             | 4.07 | Is it likely that the taxon will host, and/or act as a vector for, recognised pests and infectious agents that are endemic in the RA                                    | No                                                  | The Long-Term Dynamics of Parasite Infection in Coregonids with Different Food Specializations A. L. Gavrilov & O. A. Gos'kova. 2018                                                                                                                                                                                                                                                        | High      |
| 21                                             | 4.08 | Is it likely that the taxon will host, and/or act as a vector for, recognised pests and infectious agents that are absent from (novel to) the RA area?                  | Yes                                                 | The Long-Term Dynamics of Parasite Infection in Coregonids with Different Food Specializations A. L. Gavrilov & O. A. Gos'kova. 2018                                                                                                                                                                                                                                                        | Very high |
| 22                                             | 4.09 | Is it likely that the taxon will achieve a body size that will make it more likely to be released from captivity?                                                       | No                                                  | https://www.luontoportti.com/suomi/en/kalat/peled                                                                                                                                                                                                                                                                                                                                           | Very high |
| 23                                             | 4.10 | Is the taxon capable of sustaining itself in a range of water velocity conditions (e.g. versatile in habitat use)?                                                      | Yes                                                 | Drift of Cisco and Whitefish Larvae in a Norwegian River Tor F. Næsje, Bror Jonsson, Odd T. Sandlund. 1986                                                                                                                                                                                                                                                                                  | High      |

|                                 |      |                                                                                                                                                                              |     |                                                                                                                                                                                                                                                                                                                                                                                                                                 |           |
|---------------------------------|------|------------------------------------------------------------------------------------------------------------------------------------------------------------------------------|-----|---------------------------------------------------------------------------------------------------------------------------------------------------------------------------------------------------------------------------------------------------------------------------------------------------------------------------------------------------------------------------------------------------------------------------------|-----------|
| 24                              | 4.11 | Is it likely that the taxon's mode of existence (e.g. excretion of by-products) or behaviours (e.g. feeding) will reduce habitat quality for native taxa?                    | No  | <a href="https://www.luontoportti.com/suomi/en/kalat/peled">https://www.luontoportti.com/suomi/en/kalat/peled</a>                                                                                                                                                                                                                                                                                                               | High      |
| 25                              | 4.12 | Is the taxon likely to maintain a viable population even when present in low densities (or persisting in adverse conditions by way of a dormant form)?                       | Yes | Relationship between annual variation in reservoir conditions and year-class strength of peled ( <i>Coregonus peled</i> ) and whitefish ( <i>C. lavaretus</i> ) Tapio Sutela1, Ahti Mutenia2 & Erno Salonen. 2002                                                                                                                                                                                                               | High      |
| <b>5. Resource exploitation</b> |      |                                                                                                                                                                              |     |                                                                                                                                                                                                                                                                                                                                                                                                                                 |           |
| 26                              | 5.01 | Is the taxon likely to consume threatened or protected native taxa in the RA area?                                                                                           | Yes | Ecological succession in mountain lake ecosystems of Southern Siberia after the introduction of the peled – <i>Coregonus peled</i> (Gmel, 1778) V. K. Popkov. 2018                                                                                                                                                                                                                                                              | High      |
| 27                              | 5.02 | Is the taxon likely to sequester food resources (including nutrients) to the detriment of native taxa in the RA area?                                                        | Yes | Ecological succession in mountain lake ecosystems of Southern Siberia after the introduction of the peled – <i>Coregonus peled</i> (Gmel, 1778) V. K. Popkov. 2018                                                                                                                                                                                                                                                              | High      |
| <b>6. Reproduction</b>          |      |                                                                                                                                                                              |     |                                                                                                                                                                                                                                                                                                                                                                                                                                 |           |
| 28                              | 6.01 | Is the taxon likely to exhibit parental care and/or to reduce age-at-maturity in response to environmental conditions?                                                       | Yes | Ecological succession in mountain lake ecosystems of Southern Siberia after the introduction of the peled – <i>Coregonus peled</i> (Gmel, 1778) V. K. Popkov. 2018                                                                                                                                                                                                                                                              | High      |
| 29                              | 6.02 | Is the taxon likely to produce viable gametes or propagules (in the RA area)?                                                                                                | Yes | FRESHWATER ALIEN FISH SPECIES INTRODUCED INTO CROATIA FOR AQUACULTURE AND CONSEQUENCES OF THEIR ESCAPES AND RELEASES IN INLAND WATERS Marina Piria1*, Divna Lukia1, Tatiana Boroša-Peciqoš2 1University. 2016                                                                                                                                                                                                                   | High      |
| 30                              | 6.03 | Is the taxon likely to hybridise naturally with native taxa?                                                                                                                 | Yes | Native vendace ( <i>Coregonus albula</i> ) and alien peled ( <i>C. peled</i> ): genetic comparison and introgressive hybridization. Borovikova, E et al. 2016 Introgressive hybridization of the introduced peled ( <i>Coregonus peled</i> ) with the native whitefish ( <i>Coregonus lavaretus</i> ) threatens indigenous coregonid populations: a case study. Author(s) : Luczynski, M. ; Mamcarz, A. ; Brzuzan, P. ; Demska- | Very high |
| 31                              | 6.04 | Is the taxon likely to be hermaphroditic or to display asexual reproduction?                                                                                                 | No  | <a href="https://www.fishbase.se/summary/Coregonus-peled.html">https://www.fishbase.se/summary/Coregonus-peled.html</a>                                                                                                                                                                                                                                                                                                         | High      |
| 32                              | 6.05 | Is the taxon dependent on the presence of another taxon (or specific habitat features) to complete its life cycle?                                                           | No  | <a href="https://www.fishbase.se/summary/Coregonus-peled.html">https://www.fishbase.se/summary/Coregonus-peled.html</a>                                                                                                                                                                                                                                                                                                         | High      |
| 33                              | 6.06 | Is the taxon known (or likely) to produce a large number of propagules or offspring within a short time span (e.g. < 1 year)?                                                | Yes | Relationship between annual variation in reservoir conditions and year-class strength of peled ( <i>Coregonus peled</i> ) and whitefish ( <i>C. lavaretus</i> ) Tapio Sutela1, Ahti Mutenia2 & Erno Salonen. 2002                                                                                                                                                                                                               | Very high |
| 34                              | 6.07 | How many time units (days, months, years) does the taxon require to reach the age-at-first-reproduction?                                                                     | 2   | Ecological succession in mountain lake ecosystems of Southern Siberia after the introduction of the peled – <i>Coregonus peled</i> (Gmel, 1778) V. K. Popkov. 2018                                                                                                                                                                                                                                                              | High      |
| <b>7. Dispersal mechanisms</b>  |      |                                                                                                                                                                              |     |                                                                                                                                                                                                                                                                                                                                                                                                                                 |           |
| 35                              | 7.01 | How many potential internal vectors/pathways could the taxon use to disperse within the RA area (with suitable)                                                              | One | Habekovic. Introdukcija koregonusa u nase vode. 1972                                                                                                                                                                                                                                                                                                                                                                            | High      |
| 36                              | 7.02 | Will any of these vectors/pathways bring the taxon in close proximity to one or more protected areas (e.g. MCZ, MPA, SSSI)?                                                  | Yes | Habekovic. Introdukcija koregonusa u nase vode. 1972                                                                                                                                                                                                                                                                                                                                                                            | Very high |
| 37                              | 7.03 | Does the taxon have a means of actively attaching itself to hard substrata (e.g. ship hulls, pilings, buoys) such that it enhances the likelihood of dispersal?              | No  | <a href="https://www.fishbase.se/summary/Coregonus-peled.html">https://www.fishbase.se/summary/Coregonus-peled.html</a>                                                                                                                                                                                                                                                                                                         | Very high |
| 38                              | 7.04 | Is natural dispersal of the taxon likely to occur as eggs (for animals) or as propagules (for plants: seeds, spores) in the RA area?                                         | No  | Habekovic. Introdukcija koregonusa u nase vode. 1972                                                                                                                                                                                                                                                                                                                                                                            | High      |
| 39                              | 7.05 | Is natural dispersal of the taxon likely to occur as larvae/juveniles (for animals) or as fragments/seedlings (for plants) in the RA area?                                   | Yes | Habekovic. Introdukcija koregonusa u nase vode. 1972                                                                                                                                                                                                                                                                                                                                                                            | High      |
| 40                              | 7.06 | Are older life stages of the taxon likely to migrate in the RA area for reproduction?                                                                                        | Yes | Habekovic. Introdukcija koregonusa u nase vode. 1972                                                                                                                                                                                                                                                                                                                                                                            | High      |
| 41                              | 7.07 | Are propagules or eggs of the taxon likely to be dispersed in the RA area by other animals?                                                                                  | No  | Habekovic. Introdukcija koregonusa u nase vode. 1972                                                                                                                                                                                                                                                                                                                                                                            | High      |
| 42                              | 7.08 | Is dispersal of the taxon along any of the vectors/pathways mentioned in the previous seven questions (35–41; i.e. both unintentional or intentional) likely to be           | No  | <a href="https://www.luontoportti.com/suomi/en/kalat/peled">https://www.luontoportti.com/suomi/en/kalat/peled</a>                                                                                                                                                                                                                                                                                                               | High      |
| 43                              | 7.09 | Is dispersal of the taxon density dependent?                                                                                                                                 | Yes | Effects of Climatic and Density-Dependent Factors on Year-Class Strength of <i>Coregonus lavaretus</i> in Lake Constance. Reiner Eckmann, Ursula Gaedke, and Hans Johst Wetzlar. 1988                                                                                                                                                                                                                                           | Medium    |
| <b>8. Tolerance attributes</b>  |      |                                                                                                                                                                              |     |                                                                                                                                                                                                                                                                                                                                                                                                                                 |           |
| 44                              | 8.01 | Is the taxon able to withstand being out of water for extended periods (e.g. minimum of one or more hours) at some stage of its life cycle?                                  | No  | <a href="https://www.fishbase.se/summary/Coregonus-peled.html">https://www.fishbase.se/summary/Coregonus-peled.html</a>                                                                                                                                                                                                                                                                                                         | Very high |
| 45                              | 8.02 | Is the taxon tolerant of a wide range of water quality conditions relevant to that taxon? [In the Justification field, indicate the relevant water quality variable(s) being | No  | <a href="https://www.luontoportti.com/suomi/en/kalat/peled">https://www.luontoportti.com/suomi/en/kalat/peled</a> Relationship between annual variation in reservoir conditions and year-class strength of peled ( <i>Coregonus peled</i> ) and whitefish ( <i>C. lavaretus</i> ) Tapio Sutela1, Ahti Mutenia2 & Erno Salonen. 2002                                                                                             | Medium    |
| 46                              | 8.03 | Can the taxon be controlled or eradicated in the wild with chemical, biological, or other agents/means?                                                                      | No  | <a href="https://www.luontoportti.com/suomi/en/kalat/peled">https://www.luontoportti.com/suomi/en/kalat/peled</a> Relationship between annual variation in reservoir conditions and year-class strength of peled ( <i>Coregonus peled</i> ) and whitefish ( <i>C. lavaretus</i> ) Tapio Sutela1, Ahti Mutenia2 & Erno Salonen. 2002                                                                                             | High      |
| 47                              | 8.04 | Is the taxon likely to tolerate or benefit from environmental/human disturbance?                                                                                             | No  | <a href="https://www.luontoportti.com/suomi/en/kalat/peled">https://www.luontoportti.com/suomi/en/kalat/peled</a>                                                                                                                                                                                                                                                                                                               | Very high |
| 48                              | 8.05 | Is the taxon able to tolerate salinity levels that are higher or lower than those found in its usual environment?                                                            | Yes | <a href="https://www.fishbase.se/summary/Coregonus-peled.html">https://www.fishbase.se/summary/Coregonus-peled.html</a>                                                                                                                                                                                                                                                                                                         | Medium    |
| 49                              | 8.06 | Are there effective natural enemies (predators) of the taxon present in the RA                                                                                               | Yes | <a href="https://www.fishbase.se/summary/Coregonus-peled.html">https://www.fishbase.se/summary/Coregonus-peled.html</a>                                                                                                                                                                                                                                                                                                         | High      |
| <b>C. Climate change</b>        |      |                                                                                                                                                                              |     |                                                                                                                                                                                                                                                                                                                                                                                                                                 |           |
| <b>9. Climate change</b>        |      |                                                                                                                                                                              |     |                                                                                                                                                                                                                                                                                                                                                                                                                                 |           |

|    |      |                                                                                                                                                              |           |                                                                                                                                                                                                 |           |
|----|------|--------------------------------------------------------------------------------------------------------------------------------------------------------------|-----------|-------------------------------------------------------------------------------------------------------------------------------------------------------------------------------------------------|-----------|
| 50 | 9.01 | Under the predicted future climatic conditions, are the risks of entry into the RA area posed by the taxon likely to increase, decrease or not change?       | No change | FRESHWATER ALIEN FISH SPECIES INTRODUCED INTO CROATIA FOR AQUACULTURE AND CONSEQUENCES OF THEIR ESCAPES AND RELEASES IN INLAND WATERS Marina Piria1*, Divna Lukić1, Tatjana Boroša-Pecigoš 2016 | Very high |
| 51 | 9.02 | Under the predicted future climatic conditions, are the risks of establishment posed by the taxon likely to increase, decrease or not change?                | Decrease  | Coregonus peled, Northern Whitefish Assessment by: Freyhof, J. & Kottelat, M.. Red list                                                                                                         | High      |
| 52 | 9.03 | Under the predicted future climatic conditions, are the risks of dispersal within the RA area posed by the taxon likely to increase, decrease or not change? | Decrease  | Coregonus peled, Northern Whitefish Assessment by: Freyhof, J. & Kottelat, M.                                                                                                                   | High      |
| 53 | 9.04 | Under the predicted future climatic conditions, what is the likely magnitude of future potential impacts on biodiversity and/or ecological integrity/status? | No change | Coregonus peled, Northern Whitefish Assessment by: Freyhof, J. & Kottelat, M.                                                                                                                   | High      |
| 54 | 9.05 | Under the predicted future climatic conditions, what is the likely magnitude of future potential impacts on ecosystem structure and/or function?             | No change | Coregonus peled, Northern Whitefish Assessment by: Freyhof, J. & Kottelat, M.                                                                                                                   | High      |
| 55 | 9.06 | Under the predicted future climatic conditions, what is the likely magnitude of future potential impacts on ecosystem services/socio-economic factors?       | No change | Coregonus peled, Northern Whitefish Assessment by: Freyhof, J. & Kottelat, M.                                                                                                                   | High      |

| Statistics                                     |             |
|------------------------------------------------|-------------|
| Scores                                         |             |
| <b>BRA</b>                                     | <b>23.5</b> |
| <b>BRA Outcome</b>                             | <b>-</b>    |
| <b>BRA+CCA</b>                                 | <b>19.5</b> |
| <b>BRA+CCA Outcome</b>                         | <b>-</b>    |
| Score partition                                |             |
| <b>A. Biogeography/Historical</b>              | <b>9.5</b>  |
| 1. Domestication/Cultivation                   | 4.0         |
| 2. Climate, distribution and introduction risk | 1.0         |
| 3. Invasive elsewhere                          | 4.5         |
| <b>B. Biology/Ecology</b>                      | <b>14.0</b> |
| 4. Undesirable (or persistence) traits         | 3.0         |
| 5. Resource exploitation                       | 7.0         |
| 6. Reproduction                                | 4.0         |
| 7. Dispersal mechanisms                        | 1.0         |
| 8. Tolerance attributes                        | -1.0        |
| <b>C. Climate change</b>                       | <b>-4.0</b> |
| 9. Climate change                              | -4.0        |
| Answered Questions                             |             |
| <b>Total</b>                                   | <b>55</b>   |
| <b>A. Biogeography/Historical</b>              | <b>13</b>   |
| 1. Domestication/Cultivation                   | 3           |
| 2. Climate, distribution and introduction risk | 5           |
| 3. Invasive elsewhere                          | 5           |
| <b>B. Biology/Ecology</b>                      | <b>36</b>   |
| 4. Undesirable (or persistence) traits         | 12          |
| 5. Resource exploitation                       | 2           |
| 6. Reproduction                                | 7           |
| 7. Dispersal mechanisms                        | 9           |
| 8. Tolerance attributes                        | 6           |
| <b>C. Climate change</b>                       | <b>6</b>    |
| 9. Climate change                              | 6           |
| Sectors affected                               |             |
| <b>Commercial</b>                              | <b>7</b>    |
| <b>Environmental</b>                           | <b>7</b>    |
| <b>Species or population nuisance traits</b>   | <b>8</b>    |

| Thresholds     |             |
|----------------|-------------|
| <b>BRA</b>     | <b>-</b>    |
| <b>BRA+CCA</b> | <b>-</b>    |
| Confidence     |             |
| <b>BRA+CCA</b> | <b>0.83</b> |
| <b>BRA</b>     | <b>0.83</b> |
| <b>CCA</b>     | <b>0.79</b> |

| Date and Time       |  |
|---------------------|--|
| 24/05/2021 23:40:57 |  |

AS-ISK v2

| Taxon and Assessor details         |                                         |
|------------------------------------|-----------------------------------------|
| Category                           | Fishes and Lampreys (freshwater)        |
| Taxon name                         | <i>Coregonus peled</i>                  |
| Common name                        | peled                                   |
| Assessor                           | Ivan Špelić                             |
| Risk screening context             |                                         |
| Reason and socio-economic benefits |                                         |
| Risk assessment area               | Danube & Adriatic basins BA, HR, ME, RS |
| Taxonomy                           |                                         |
| Native range                       |                                         |
| Introduced range                   |                                         |
| URL                                |                                         |

|                                                |      | Response                                                                                                                                                                | Justification (references and/or other information) | Confidence                                                                                                                                                                                                                                                                                                                            |           |
|------------------------------------------------|------|-------------------------------------------------------------------------------------------------------------------------------------------------------------------------|-----------------------------------------------------|---------------------------------------------------------------------------------------------------------------------------------------------------------------------------------------------------------------------------------------------------------------------------------------------------------------------------------------|-----------|
| A. Biogeography/Historical                     |      |                                                                                                                                                                         |                                                     |                                                                                                                                                                                                                                                                                                                                       |           |
| 1. Domestication/Cultivation                   |      |                                                                                                                                                                         |                                                     |                                                                                                                                                                                                                                                                                                                                       |           |
| 1                                              | 1.01 | Has the taxon been the subject of domestication (or cultivation) for at least 20 generations?                                                                           | Yes                                                 | Matousek, J., Stejskal, V., Prokesova, M., & Kouril, J. (2016). The effect of water temperature on growth parameters of intensively reared juvenile peled <i>Coregonus peled</i> . Aquaculture Research, 48(4), 1877–1884. doi:10.1111/are.13025                                                                                      | Very high |
| 2                                              | 1.02 | Is the taxon harvested in the wild and likely to be sold or used in its live form?                                                                                      | No                                                  | Harvested for food, stocked from farms (personal opinion).                                                                                                                                                                                                                                                                            | Medium    |
| 3                                              | 1.03 | Does the taxon have invasive races, varieties, sub-taxa or congeners?                                                                                                   | No                                                  | Coregonidae are widely introduced but not considered as serious pests.                                                                                                                                                                                                                                                                | High      |
| 2. Climate, distribution and introduction risk |      |                                                                                                                                                                         |                                                     |                                                                                                                                                                                                                                                                                                                                       |           |
| 4                                              | 2.01 | How similar are the climatic conditions of the Risk Assessment (RA) area and the taxon's native range?                                                                  | Medium                                              | Climatch 2020                                                                                                                                                                                                                                                                                                                         | Medium    |
| 5                                              | 2.02 | What is the quality of the climate matching data?                                                                                                                       | Medium                                              | Climatch 2020                                                                                                                                                                                                                                                                                                                         | High      |
| 6                                              | 2.03 | Is the taxon already present outside of captivity in the RA area?                                                                                                       | Yes                                                 | Introduced to Serbia (Froese, R. and D. Pauly. Editors. 2021.FishBase. World Wide Web electronic publication. www.fishbase.org, ( 02/2021 ))                                                                                                                                                                                          | Medium    |
| 7                                              | 2.04 | How many potential vectors could the taxon use to enter in the RA area?                                                                                                 | Not applicable                                      | Already present                                                                                                                                                                                                                                                                                                                       | Medium    |
| 8                                              | 2.05 | Is the taxon currently found in close proximity to, and likely to enter into, the RA area in the near future (e.g. unintentional and intentional introductions)?        | Not applicable                                      | Already present.                                                                                                                                                                                                                                                                                                                      | Medium    |
| 3. Invasive elsewhere                          |      |                                                                                                                                                                         |                                                     |                                                                                                                                                                                                                                                                                                                                       |           |
| 9                                              | 3.01 | Has the taxon become naturalised (established viable populations) outside its native range?                                                                             | Yes                                                 | Salonen, E. & Mutenia, A. 2007. Alien fish species in northernmost Finland. Riista- ja kalatalous – Tutkimuksia 2: 1 – 16(Report of the Finnish Game and Fisheries Research Institute).                                                                                                                                               | Very high |
| 10                                             | 3.02 | In the taxon's introduced range, are there known adverse impacts to wild stocks or commercial taxa?                                                                     | Yes                                                 | Popović, D., Szczepkowski, M., Heese, T., & Weglenski, P. (2015). Introgression of peled ( <i>Coregonus peled</i> ) into European whitefish ( <i>C. lavaretus</i> ) in Poland. Conservation Genetics, 17(2), 503–508. doi:10.1007/s10592-015-0786-1                                                                                   | Very high |
| 11                                             | 3.03 | In the taxon's introduced range, are there known adverse impacts to aquaculture?                                                                                        | No                                                  | No reported adverse impacts, used in aquaculture (Matousek, J., Stejskal, V., Prokesova, M., & Kouril, J. (2016). The effect of water temperature on growth parameters of intensively reared juvenile peled <i>Coregonus peled</i> . Aquaculture Research, 48(4), 1877–1884. doi:10.1111/are.13025).                                  | High      |
| 12                                             | 3.04 | In the taxon's introduced range, are there known adverse impacts to ecosystem services?                                                                                 | No                                                  | Salonen, E. & Mutenia, A. 2007. Alien fish species in northernmost Finland. Riista- ja kalatalous – Tutkimuksia 2: 1 – 16(Report of the Finnish Game and Fisheries Research Institute).                                                                                                                                               | High      |
| 13                                             | 3.05 | In the taxon's introduced range, are there known adverse socio-economic impacts?                                                                                        | No                                                  | Salonen, E. & Mutenia, A. 2007. Alien fish species in northernmost Finland. Riista- ja kalatalous – Tutkimuksia 2: 1 – 16(Report of the Finnish Game and Fisheries Research Institute).                                                                                                                                               | High      |
| B. Biology/Ecology                             |      |                                                                                                                                                                         |                                                     |                                                                                                                                                                                                                                                                                                                                       |           |
| 4. Undesirable (or persistence) traits         |      |                                                                                                                                                                         |                                                     |                                                                                                                                                                                                                                                                                                                                       |           |
| 14                                             | 4.01 | Is it likely that the taxon will be poisonous or pose other risks to human health?                                                                                      | No                                                  | Potential pest but no direct harm to human health (Froese & Pauly 2020).                                                                                                                                                                                                                                                              | High      |
| 15                                             | 4.02 | Is it likely that the taxon will smother one or more native taxa (that are not threatened or protected)?                                                                | Yes                                                 | Salonen, E. & Mutenia, A. 2007. Alien fish species in northernmost Finland. Riista- ja kalatalous – Tutkimuksia 2: 1 – 16(Report of the Finnish Game and Fisheries Research Institute).                                                                                                                                               | High      |
| 16                                             | 4.03 | Are there any threatened or protected taxa that the non-native taxon would parasitise in the RA area?                                                                   | No                                                  | No parasitic behaviour.                                                                                                                                                                                                                                                                                                               | Very high |
| 17                                             | 4.04 | Is the taxon adaptable in terms of climatic and other environmental conditions, thus enhancing its potential persistence if it has invaded or could invade the RA area? | No                                                  | Coregonids need oligotrophic to mesotrophic waters, cool and well oxygenated. Lethal temperature for <i>C. lavaretus</i> is more or less 22°C with an optimum of less than 15°C. <i>C. peled</i> is more tolerant dealing with temperatures ranging from 0 to 28°C, but on the other hand recommends water temperature is below 25°C. | Very high |
| 18                                             | 4.05 | Is the taxon likely to disrupt food-web structure/function in aquatic ecosystems if it has invaded or is likely to invade the RA area?                                  | No                                                  | Not reported anywhere (Northern Whitefish ( <i>Coregonus peled</i> ) Ecological Risk Screening Summary. U.S. Fish and Wildlife Service, March 2011;;Revised, September 2014 and July 2015).                                                                                                                                           | Medium    |
| 19                                             | 4.06 | Is the taxon likely to exert adverse impacts on ecosystem services in the RA area?                                                                                      | No                                                  | Northern Whitefish ( <i>Coregonus peled</i> ) Ecological Risk Screening Summary. U.S. Fish and Wildlife Service, March 2011;;Revised, September 2014 and July 2015.                                                                                                                                                                   | Medium    |
| 20                                             | 4.07 | Is it likely that the taxon will host, and/or act as a vector for, recognised pests and infectious agents that are endemic in the RA area?                              | Yes                                                 | Enteric Redmouth Disease, Bacterial diseases (Froese & Pauly 2020).                                                                                                                                                                                                                                                                   | High      |
| 21                                             | 4.08 | Is it likely that the taxon will host, and/or act as a vector for, recognised pests and infectious agents that are absent from (novel to) the RA area?                  | Yes                                                 | Enteric Redmouth Disease, Bacterial diseases (Froese & Pauly 2020).                                                                                                                                                                                                                                                                   | High      |
| 22                                             | 4.09 | Is it likely that the taxon will achieve a body size that will make it more likely to be released from captivity?                                                       | Yes                                                 | 50 cm, 5 kg max (Froese & Pauly 2020).                                                                                                                                                                                                                                                                                                | Very high |

|                                 |      |                                                                                                                                                                              |                |                                                                                                                                                                                                                                                                                                                                                                                                                                                                                                                   |           |
|---------------------------------|------|------------------------------------------------------------------------------------------------------------------------------------------------------------------------------|----------------|-------------------------------------------------------------------------------------------------------------------------------------------------------------------------------------------------------------------------------------------------------------------------------------------------------------------------------------------------------------------------------------------------------------------------------------------------------------------------------------------------------------------|-----------|
| 23                              | 4.10 | Is the taxon capable of sustaining itself in a range of water velocity conditions (e.g. versatile in habitat use)?                                                           | Yes            | Lacustrine, fluvial and anadromous forms exist (Froese & Pauly 2020).                                                                                                                                                                                                                                                                                                                                                                                                                                             | High      |
| 24                              | 4.11 | Is it likely that the taxon's mode of existence (e.g. excretion of by-products) or behaviours (e.g. feeding) will reduce habitat quality for native taxa?                    | No             | Not mentioned as impact in literature.                                                                                                                                                                                                                                                                                                                                                                                                                                                                            | Medium    |
| 25                              | 4.12 | Is the taxon likely to maintain a viable population even when present in low densities (or persisting in adverse conditions by way of a dormant form)?                       | No             | Introduced populations rely mostly on stocking (Salonen, E. & Mutenia, A. 2007. Alien fish species in northern-most Finland. Riista- ja kalatalous – Tutkimuksia 2: 1 – 16(Report of the Finnish Game and Fisheries Research Institute)(Malbrouck, C., P. Mergen and J.-C. Micha, 2005. Growth and diet of introduced coregonid fish Coregonus peled (Gmelin) and Coregonus lavaretus (L.) in two Belgian reservoir lakes. Appl. Ecol. Env. Res. 4(1):27-44.).                                                    | High      |
| <b>5. Resource exploitation</b> |      |                                                                                                                                                                              |                |                                                                                                                                                                                                                                                                                                                                                                                                                                                                                                                   |           |
| 26                              | 5.01 | Is the taxon likely to consume threatened or protected native taxa in the RA area?                                                                                           | No             | Feeds on zooplankton (mostly crustaceans), benthic animals (especially insect larvae and mussels, also algae) and insects from surface (Froese & Pauly 2020).                                                                                                                                                                                                                                                                                                                                                     | High      |
| 27                              | 5.02 | Is the taxon likely to sequester food resources (including nutrients) to the detriment of native taxa in the RA area?                                                        | Not applicable | No data for calculation.                                                                                                                                                                                                                                                                                                                                                                                                                                                                                          | Very high |
| <b>6. Reproduction</b>          |      |                                                                                                                                                                              |                |                                                                                                                                                                                                                                                                                                                                                                                                                                                                                                                   |           |
| 28                              | 6.01 | Is the taxon likely to exhibit parental care and/or to reduce age-at-maturity in response to environmental conditions?                                                       | No             | No information in literature.                                                                                                                                                                                                                                                                                                                                                                                                                                                                                     | Medium    |
| 29                              | 6.02 | Is the taxon likely to produce viable gametes or propagules (in the RA area)?                                                                                                | Yes            | No natural reproduction in most areas of introduction but probably possible if all conditions met (Salonen, E. & Mutenia, A. 2007. Alien fish species in northern-most Finland. Riista- ja kalatalous – Tutkimuksia 2: 1 – 16(Report of the Finnish Game and Fisheries Research Institute)(Malbrouck, C., P. Mergen and J.-C. Micha, 2005. Growth and diet of introduced coregonid fish Coregonus peled (Gmelin) and Coregonus lavaretus (L.) in two Belgian reservoir lakes. Appl. Ecol. Env. Res. 4(1):27-44.). | Low       |
| 30                              | 6.03 | Is the taxon likely to hybridise naturally with native taxa?                                                                                                                 | No             | No native Coregonidae in RA area (Kottelat & Freyhof 2007).                                                                                                                                                                                                                                                                                                                                                                                                                                                       | Very high |
| 31                              | 6.04 | Is the taxon likely to be hermaphroditic or to display asexual reproduction?                                                                                                 | No             | Kottelat & Freyhof 2007                                                                                                                                                                                                                                                                                                                                                                                                                                                                                           | Very high |
| 32                              | 6.05 | Is the taxon dependent on the presence of another taxon (or specific habitat features) to complete its life cycle?                                                           | Yes            | (Salonen, E. & Mutenia, A. 2007. Alien fish species in northern-most Finland. Riista- ja kalatalous – Tutkimuksia 2: 1 – 16(Report of the Finnish Game and Fisheries Research Institute)(Malbrouck, C., P. Mergen and J.-C. Micha, 2005. Growth and diet of introduced coregonid fish Coregonus peled (Gmelin) and Coregonus lavaretus (L.) in two Belgian reservoir lakes. Appl.                                                                                                                                 | High      |
| 33                              | 6.06 | Is the taxon known (or likely) to produce a large number of propagules or offspring within a short time span (e.g. < 1 year)?                                                | Yes            | Up to 105000 eggs per female (Froese & Pauly 2020).                                                                                                                                                                                                                                                                                                                                                                                                                                                               | Very high |
| 34                              | 6.07 | How many time units (days, months, years) does the taxon require to reach the age-at-first-reproduction?                                                                     | 3              | In Russia (Froese & Pauly 2020).                                                                                                                                                                                                                                                                                                                                                                                                                                                                                  | Medium    |
| <b>7. Dispersal mechanisms</b>  |      |                                                                                                                                                                              |                |                                                                                                                                                                                                                                                                                                                                                                                                                                                                                                                   |           |
| 35                              | 7.01 | How many potential internal vectors/pathways could the taxon use to disperse within the RA area (with suitable habitats nearby)?                                             | >1             | Intentional introductions for angling (Northern Whitefish (Coregonus peled) Ecological Risk Screening Summary. U.S. Fish and Wildlife Service, March 2011,;Revised, September 2014 and July 2015.) Floods (Povž et al. 2015)                                                                                                                                                                                                                                                                                      | Medium    |
| 36                              | 7.02 | Will any of these vectors/pathways bring the taxon in close proximity to one or more protected areas (e.g. MCZ, MPA, SSSI)?                                                  | No             | Personal opinion                                                                                                                                                                                                                                                                                                                                                                                                                                                                                                  | Low       |
| 37                              | 7.03 | Does the taxon have a means of actively attaching itself to hard substrata (e.g. ship hulls, pilings, buoys) such that it enhances the likelihood of dispersal?              | No             | No adaptations.                                                                                                                                                                                                                                                                                                                                                                                                                                                                                                   | Very high |
| 38                              | 7.04 | Is natural dispersal of the taxon likely to occur as eggs (for animals) or as propagules (for plants: seeds, spores) in the RA area?                                         | No             | Eggs deposited on gravel or sand (Kottelat & Freyhof 2007).                                                                                                                                                                                                                                                                                                                                                                                                                                                       | High      |
| 39                              | 7.05 | Is natural dispersal of the taxon likely to occur as larvae/juveniles (for animals) or as fragments/seedlings (for plants) in the RA area?                                   | Yes            | Larval drift in rivers (Bogdanov, V. D., & Bogdanova, E. N. (2012). Ecological aspects of larval drift in coregonids with long migration routes. Russian Journal of Ecology, 43(4), 315–322. doi:10.1134/s1067413612040042 ).                                                                                                                                                                                                                                                                                     | High      |
| 40                              | 7.06 | Are older life stages of the taxon likely to migrate in the RA area for reproduction?                                                                                        | Yes            | Salonen, E. & Mutenia, A. 2007. Alien fish species in northern-most Finland. Riista- ja kalatalous – Tutkimuksia 2: 1 – 16(Report of the Finnish Game and Fisheries Research Institute                                                                                                                                                                                                                                                                                                                            | Medium    |
| 41                              | 7.07 | Are propagules or eggs of the taxon likely to be dispersed in the RA area by other animals?                                                                                  | No             | Eggs deposited on gravel or sand (Kottelat & Freyhof 2007).                                                                                                                                                                                                                                                                                                                                                                                                                                                       | High      |
| 42                              | 7.08 | Is dispersal of the taxon along any of the vectors/pathways mentioned in the previous seven questions (35–41; i.e. both unintentional or intentional) likely to be           | Yes            | Introductions and floods.                                                                                                                                                                                                                                                                                                                                                                                                                                                                                         | High      |
| 43                              | 7.09 | Is dispersal of the taxon density dependent?                                                                                                                                 | No             | No such information in literature.                                                                                                                                                                                                                                                                                                                                                                                                                                                                                | Low       |
| <b>8. Tolerance attributes</b>  |      |                                                                                                                                                                              |                |                                                                                                                                                                                                                                                                                                                                                                                                                                                                                                                   |           |
| 44                              | 8.01 | Is the taxon able to withstand being out of water for extended periods (e.g. minimum of one or more hours) at some stage of its life cycle?                                  | No             | Sensitive species                                                                                                                                                                                                                                                                                                                                                                                                                                                                                                 | Very high |
| 45                              | 8.02 | Is the taxon tolerant of a wide range of water quality conditions relevant to that taxon? [In the Justification field, indicate the relevant water quality variable(s) being | No             | Malbrouck, C., P. Mergen and J.-C. Micha, 2005. Growth and diet of introduced coregonid fish Coregonus peled (Gmelin) and Coregonus lavaretus (L.) in two Belgian reservoir lakes. Appl. Ecol. Env. Res. 4(1):27-44.)                                                                                                                                                                                                                                                                                             | High      |
| 46                              | 8.03 | Can the taxon be controlled or eradicated in the wild with chemical, biological, or other agents/means?                                                                      | No             | Not allowed in the region.                                                                                                                                                                                                                                                                                                                                                                                                                                                                                        | Very high |

|                          |      |                                                                                                                                                              |                |                                                                                                                                                                                                                                                                             |           |
|--------------------------|------|--------------------------------------------------------------------------------------------------------------------------------------------------------------|----------------|-----------------------------------------------------------------------------------------------------------------------------------------------------------------------------------------------------------------------------------------------------------------------------|-----------|
| 47                       | 8.04 | Is the taxon likely to tolerate or benefit from environmental/human disturbance?                                                                             | Yes            | Introduced in reservoirs where it survives (Malbrouck, C., P. Mergen and J.-C. Micha, 2005. Growth and diet of introduced coregonid fish <i>Coregonus peled</i> (Gmelin) and <i>Coregonus lavaretus</i> (L.) in two Belgian reservoir lakes. Appl. Ecol. Env. Res. 4(1):27- | Medium    |
| 48                       | 8.05 | Is the taxon able to tolerate salinity levels that are higher or lower than those found in its usual environment?                                            | No             | Moskalenko, B.K. 1971. The whitefishes of Siberia. Pishchevaya Promyshlennost, Report SFWFR-TR-73-05, Moscow (translated from Russian in 1972 by R.M. Howland and G. Kavanagh, U.S. Department of the Interior, Division of Fishery Research, Washington, D.C., USA.        | Very high |
| 49                       | 8.06 | Are there effective natural enemies (predators) of the taxon present in the RA                                                                               | Yes            | Piscivorous fish and birds, otters (personal opinion).                                                                                                                                                                                                                      | Medium    |
| <b>C. Climate change</b> |      |                                                                                                                                                              |                |                                                                                                                                                                                                                                                                             |           |
| <b>9. Climate change</b> |      |                                                                                                                                                              |                |                                                                                                                                                                                                                                                                             |           |
| 50                       | 9.01 | Under the predicted future climatic conditions, are the risks of entry into the RA area posed by the taxon likely to increase, decrease or not change?       | Not applicable | Already present.                                                                                                                                                                                                                                                            | Medium    |
| 51                       | 9.02 | Under the predicted future climatic conditions, are the risks of establishment posed by the taxon likely to increase, decrease or not change?                | Decrease       | Native in polar climate, increased temperatures will narrow its suitable habitats (personal opinion).                                                                                                                                                                       | Medium    |
| 52                       | 9.03 | Under the predicted future climatic conditions, are the risks of dispersal within the RA area posed by the taxon likely to increase, decrease or not change? | Decrease       | Native in polar climate, increased temperatures will narrow its suitable habitats (personal opinion). Intentional releases may stay the same but natural recruitment may decrease.                                                                                          | Medium    |
| 53                       | 9.04 | Under the predicted future climatic conditions, what is the likely magnitude of future potential impacts on biodiversity and/or ecological integrity/status? | No change      | No expected impact in current conditions, no impact expected under future conditions.                                                                                                                                                                                       | Medium    |
| 54                       | 9.05 | Under the predicted future climatic conditions, what is the likely magnitude of future potential impacts on ecosystem structure and/or function?             | No change      | No expected impact in current conditions, no impact expected under future conditions.                                                                                                                                                                                       | Medium    |
| 55                       | 9.06 | Under the predicted future climatic conditions, what is the likely magnitude of future potential impacts on ecosystem services/socio-economic factors?       | No change      | No expected impact in current conditions, no impact expected under future conditions.                                                                                                                                                                                       | Medium    |

| Statistics                                     |             |
|------------------------------------------------|-------------|
| Scores                                         |             |
| <b>BRA</b>                                     | <b>9.5</b>  |
| <b>BRA Outcome</b>                             | <b>-</b>    |
| <b>BRA+CCA</b>                                 | <b>5.5</b>  |
| <b>BRA+CCA Outcome</b>                         | <b>-</b>    |
| Score partition                                |             |
| <b>A. Biogeography/Historical</b>              | <b>5.5</b>  |
| 1. Domestication/Cultivation                   | 0.0         |
| 2. Climate, distribution and introduction risk | 1.0         |
| 3. Invasive elsewhere                          | 4.5         |
| <b>B. Biology/Ecology</b>                      | <b>4.0</b>  |
| 4. Undesirable (or persistence) traits         | 4.0         |
| 5. Resource exploitation                       | 0.0         |
| 6. Reproduction                                | -1.0        |
| 7. Dispersal mechanisms                        | 1.0         |
| 8. Tolerance attributes                        | 0.0         |
| <b>C. Climate change</b>                       | <b>-4.0</b> |
| 9. Climate change                              | -4.0        |
| Answered Questions                             |             |
| <b>Total</b>                                   | <b>55</b>   |
| <b>A. Biogeography/Historical</b>              | <b>13</b>   |
| 1. Domestication/Cultivation                   | 3           |
| 2. Climate, distribution and introduction risk | 5           |
| 3. Invasive elsewhere                          | 5           |
| <b>B. Biology/Ecology</b>                      | <b>36</b>   |
| 4. Undesirable (or persistence) traits         | 12          |
| 5. Resource exploitation                       | 2           |
| 6. Reproduction                                | 7           |
| 7. Dispersal mechanisms                        | 9           |
| 8. Tolerance attributes                        | 6           |
| <b>C. Climate change</b>                       | <b>6</b>    |
| 9. Climate change                              | 6           |
| Sectors affected                               |             |
| <b>Commercial</b>                              | <b>7</b>    |
| <b>Environmental</b>                           | <b>0</b>    |
| <b>Species or population nuisance traits</b>   | <b>2</b>    |

| Thresholds     |             |
|----------------|-------------|
| <b>BRA</b>     | <b>-</b>    |
| <b>BRA+CCA</b> | <b>-</b>    |
| Confidence     |             |
| <b>BRA+CCA</b> | <b>0.70</b> |
| <b>BRA</b>     | <b>0.72</b> |
| <b>CCA</b>     | <b>0.50</b> |

| Date and Time              |
|----------------------------|
| <b>13/05/2021 20:49:30</b> |

## AS-ISK v2

| Taxon and Assessor details         |                                         |
|------------------------------------|-----------------------------------------|
| Category                           | Fishes and Lampreys (freshwater)        |
| Taxon name                         | <i>Coregonus peled</i>                  |
| Common name                        | peled                                   |
| Assessor                           | Tamara Kanjuh                           |
| Risk screening context             |                                         |
| Reason and socio-economic benefits |                                         |
| Risk assessment area               | Danube & Adriatic basins BA, HR, ME, RS |
| Taxonomy                           |                                         |
| Native range                       |                                         |
| Introduced range                   |                                         |
| URL                                |                                         |

|                                                |      | Response                                                                                                                                                                | Justification (references and/or other information) | Confidence                                             |        |
|------------------------------------------------|------|-------------------------------------------------------------------------------------------------------------------------------------------------------------------------|-----------------------------------------------------|--------------------------------------------------------|--------|
| A. Biogeography/Historical                     |      |                                                                                                                                                                         |                                                     |                                                        |        |
| 1. Domestication/Cultivation                   |      |                                                                                                                                                                         |                                                     |                                                        |        |
| 1                                              | 1.01 | Has the taxon been the subject of domestication (or cultivation) for at least 20 generations?                                                                           | Yes                                                 | Froese & Pauly (2015)                                  | High   |
| 2                                              | 1.02 | Is the taxon harvested in the wild and likely to be sold or used in its live form?                                                                                      | Yes                                                 | Froese & Pauly (2015)                                  | High   |
| 3                                              | 1.03 | Does the taxon have invasive races, varieties, sub-taxa or congeners?                                                                                                   | No                                                  | No information found.                                  | Medium |
| 2. Climate, distribution and introduction risk |      |                                                                                                                                                                         |                                                     |                                                        |        |
| 4                                              | 2.01 | How similar are the climatic conditions of the Risk Assessment (RA) area and the taxon's native range?                                                                  | High                                                | Dfa, Dfb (Köppen–Geiger climate classification system) | High   |
| 5                                              | 2.02 | What is the quality of the climate matching data?                                                                                                                       | High                                                | Köppen–Geiger climate classification system            | High   |
| 6                                              | 2.03 | Is the taxon already present outside of captivity in the RA area?                                                                                                       | No                                                  | No information found.                                  | Medium |
| 7                                              | 2.04 | How many potential vectors could the taxon use to enter in the RA area?                                                                                                 | One                                                 | Fisheries                                              | High   |
| 8                                              | 2.05 | Is the taxon currently found in close proximity to, and likely to enter into, the RA area in the near future (e.g. unintentional and intentional introductions)?        | No                                                  | No information found.                                  | Medium |
| 3. Invasive elsewhere                          |      |                                                                                                                                                                         |                                                     |                                                        |        |
| 9                                              | 3.01 | Has the taxon become naturalised (established viable populations) outside its native range?                                                                             | No                                                  | No information found.                                  | Medium |
| 10                                             | 3.02 | In the taxon's introduced range, are there known adverse impacts to wild stocks or commercial taxa?                                                                     | Yes                                                 | Witkowski & Grabowska (2012)                           | High   |
| 11                                             | 3.03 | In the taxon's introduced range, are there known adverse impacts to aquaculture?                                                                                        | No                                                  | No information found.                                  | Medium |
| 12                                             | 3.04 | In the taxon's introduced range, are there known adverse impacts to ecosystem?                                                                                          | Yes                                                 | Similar to other Coregonus.                            | High   |
| 13                                             | 3.05 | In the taxon's introduced range, are there known adverse socio-economic impacts?                                                                                        | No                                                  | No information found.                                  | Medium |
| B. Biology/Ecology                             |      |                                                                                                                                                                         |                                                     |                                                        |        |
| 4. Undesirable (or persistence) traits         |      |                                                                                                                                                                         |                                                     |                                                        |        |
| 14                                             | 4.01 | Is it likely that the taxon will be poisonous or pose other risks to human health?                                                                                      | No                                                  | Harmless (FishBase)                                    | High   |
| 15                                             | 4.02 | Is it likely that the taxon will smother one or more native taxa (that are not threatened or protected)?                                                                | Yes                                                 | fws.gov                                                | High   |
| 16                                             | 4.03 | Are there any threatened or protected taxa that the non-native taxon would parasitise in the RA area?                                                                   | No                                                  | The taxon is not a parasite.                           | High   |
| 17                                             | 4.04 | Is the taxon adaptable in terms of climatic and other environmental conditions, thus enhancing its potential persistence if it has invaded or could invade the RA area? | Yes                                                 | Similar to other Coregonus.                            | Medium |
| 18                                             | 4.05 | Is the taxon likely to disrupt food-web structure/function in aquatic ecosystems if it has invaded or is likely to invade the RA area?                                  | Yes                                                 | fws.gov                                                | High   |
| 19                                             | 4.06 | Is the taxon likely to exert adverse impacts on ecosystem services in the RA area?                                                                                      | Yes                                                 | Similar to other Coregonus.                            | Medium |
| 20                                             | 4.07 | Is it likely that the taxon will host, and/or act as a vector for, recognised pests and infectious agents that are endemic in the RA area?                              | No                                                  | No information found.                                  | Medium |
| 21                                             | 4.08 | Is it likely that the taxon will host, and/or act as a vector for, recognised pests and infectious agents that are absent from (novel to) the RA area?                  | Yes                                                 | FishBase                                               | Medium |
| 22                                             | 4.09 | Is it likely that the taxon will achieve a body size that will make it more likely to be released from captivity?                                                       | No                                                  | No information found.                                  | Medium |
| 23                                             | 4.10 | Is the taxon capable of sustaining itself in a range of water velocity conditions (e.g. versatile in habitat use)?                                                      | Yes                                                 | Similar to other Coregonus.                            | Medium |
| 24                                             | 4.11 | Is it likely that the taxon's mode of existence (e.g. excretion of by-products) or behaviours (e.g. feeding) will reduce habitat quality for native taxa?               | Yes                                                 | fws.gov                                                | High   |
| 25                                             | 4.12 | Is the taxon likely to maintain a viable population even when present in low densities (or persisting in adverse conditions by way of a dormant form)?                  | No                                                  | No information found.                                  | Medium |



|                                 |      |                                                                                                                                                                              |           |                                                                   |        |
|---------------------------------|------|------------------------------------------------------------------------------------------------------------------------------------------------------------------------------|-----------|-------------------------------------------------------------------|--------|
| <b>5. Resource exploitation</b> |      |                                                                                                                                                                              |           |                                                                   |        |
| 26                              | 5.01 | Is the taxon likely to consume threatened or protected native taxa in the RA area?                                                                                           | Yes       | fws.gov                                                           | Medium |
| 27                              | 5.02 | Is the taxon likely to sequester food resources (including nutrients) to the detriment of native taxa in the RA area?                                                        | Yes       | fws.gov                                                           | Medium |
| <b>6. Reproduction</b>          |      |                                                                                                                                                                              |           |                                                                   |        |
| 28                              | 6.01 | Is the taxon likely to exhibit parental care and/or to reduce age-at-maturity in response to environmental conditions?                                                       | No        | FishBase                                                          | High   |
| 29                              | 6.02 | Is the taxon likely to produce viable gametes or propagules (in the RA area)?                                                                                                | No        | No information found.                                             | Medium |
| 30                              | 6.03 | Is the taxon likely to hybridise naturally with native taxa?                                                                                                                 | Yes       | Kirtiklis & Jankun (2006)                                         | High   |
| 31                              | 6.04 | Is the taxon likely to be hermaphroditic or to display asexual reproduction?                                                                                                 | No        | FishBase                                                          | Medium |
| 32                              | 6.05 | Is the taxon dependent on the presence of another taxon (or specific habitat features) to complete its life cycle?                                                           | No        | Not known.                                                        | Medium |
| 33                              | 6.06 | Is the taxon known (or likely) to produce a large number of propagules or offspring within a short time span (e.g. < 1 year)?                                                | Yes       | cabi.org                                                          | Medium |
| 34                              | 6.07 | How many time units (days, months, years) does the taxon require to reach the age-at-first-reproduction?                                                                     | 2         | Similar to other Coregonus.                                       | Medium |
| <b>7. Dispersal mechanisms</b>  |      |                                                                                                                                                                              |           |                                                                   |        |
| 35                              | 7.01 | How many potential internal vectors/pathways could the taxon use to disperse within the RA area (with suitable vectors/pathways)?                                            | One       | Intentional stocking.                                             | High   |
| 36                              | 7.02 | Will any of these vectors/pathways bring the taxon in close proximity to one or more protected areas (e.g. MCZ, MPA, SSSI)?                                                  | Yes       | Intentional stocking.                                             | High   |
| 37                              | 7.03 | Does the taxon have a means of actively attaching itself to hard substrata (e.g. ship hulls, pilings, buoys) such that it enhances the likelihood of dispersal?              | No        | Not known.                                                        | High   |
| 38                              | 7.04 | Is natural dispersal of the taxon likely to occur as eggs (for animals) or as propagules (for plants: seeds, spores) in the RA area?                                         | Yes       | Similar to other Coregonus.                                       | High   |
| 39                              | 7.05 | Is natural dispersal of the taxon likely to occur as larvae/juveniles (for animals) or as fragments/seedlings (for plants) in the RA area?                                   | Yes       | Similar to other Coregonus.                                       | Medium |
| 40                              | 7.06 | Are older life stages of the taxon likely to migrate in the RA area for reproduction?                                                                                        | No        | No information found.                                             | Medium |
| 41                              | 7.07 | Are propagules or eggs of the taxon likely to be dispersed in the RA area by other animals?                                                                                  | No        | No information found.                                             | Medium |
| 42                              | 7.08 | Is dispersal of the taxon along any of the vectors/pathways mentioned in the previous seven questions (35–41; i.e. both unintentional or intentional) likely to be           | Yes       | Intentional stocking.                                             | High   |
| 43                              | 7.09 | Is dispersal of the taxon density dependent?                                                                                                                                 | No        | No information found.                                             | Medium |
| <b>8. Tolerance attributes</b>  |      |                                                                                                                                                                              |           |                                                                   |        |
| 44                              | 8.01 | Is the taxon able to withstand being out of water for extended periods (e.g. minimum of one or more hours) at some stage of its life cycle?                                  | No        | The taxon can not survive out of water.                           | High   |
| 45                              | 8.02 | Is the taxon tolerant of a wide range of water quality conditions relevant to that taxon? [In the Justification field, indicate the relevant water quality variable(s) being | Yes       | Similar to other Coregonus.                                       | High   |
| 46                              | 8.03 | Can the taxon be controlled or eradicated in the wild with chemical, biological, or other agents/means?                                                                      | Yes       | Similar to other Coregonus.                                       | Medium |
| 47                              | 8.04 | Is the taxon likely to tolerate or benefit from environmental/human disturbance?                                                                                             | Yes       | Similar to other Coregonus.                                       | Medium |
| 48                              | 8.05 | Is the taxon able to tolerate salinity levels that are higher or lower than those found in its usual environment?                                                            | Yes       | Similar to other Coregonus.                                       | High   |
| 49                              | 8.06 | Are there effective natural enemies (predators) of the taxon present in the RA                                                                                               | Yes       | FishBase                                                          | Medium |
| <b>C. Climate change</b>        |      |                                                                                                                                                                              |           |                                                                   |        |
| <b>9. Climate change</b>        |      |                                                                                                                                                                              |           |                                                                   |        |
| 50                              | 9.01 | Under the predicted future climatic conditions, are the risks of entry into the RA area posed by the taxon likely to increase, decrease or not change?                       | No change | Adaptable to different environments - similar to other Coregonus. | Medium |
| 51                              | 9.02 | Under the predicted future climatic conditions, are the risks of establishment posed by the taxon likely to increase, decrease or not change?                                | No change | Adaptable to different environments - similar to other Coregonus. | Medium |
| 52                              | 9.03 | Under the predicted future climatic conditions, are the risks of dispersal within the RA area posed by the taxon likely to increase, decrease or not change?                 | No change | Adaptable to different environments - similar to other Coregonus. | Medium |
| 53                              | 9.04 | Under the predicted future climatic conditions, what is the likely magnitude of future potential impacts on biodiversity and/or ecological integrity/status?                 | No change | Adaptable to different environments - similar to other Coregonus. | Medium |

|    |      |                                                                                                                                                        |           |                                                                   |        |
|----|------|--------------------------------------------------------------------------------------------------------------------------------------------------------|-----------|-------------------------------------------------------------------|--------|
| 54 | 9.05 | Under the predicted future climatic conditions, what is the likely magnitude of future potential impacts on ecosystem structure and/or function?       | No change | Adaptable to different environments - similar to other Coregonus. | Medium |
| 55 | 9.06 | Under the predicted future climatic conditions, what is the likely magnitude of future potential impacts on ecosystem services/socio-economic factors? | No change | Adaptable to different environments - similar to other Coregonus. | Medium |

| Statistics                                     |             |
|------------------------------------------------|-------------|
| Scores                                         |             |
| <b>BRA</b>                                     | <b>30.0</b> |
| <b>BRA Outcome</b>                             | <b>-</b>    |
| <b>BRA+CCA</b>                                 | <b>30.0</b> |
| <b>BRA+CCA Outcome</b>                         | <b>-</b>    |
| Score partition                                |             |
| <b>A. Biogeography/Historical</b>              | <b>10.0</b> |
| 1. Domestication/Cultivation                   | 2.0         |
| 2. Climate, distribution and introduction risk | 0.0         |
| 3. Invasive elsewhere                          | 8.0         |
| <b>B. Biology/Ecology</b>                      | <b>20.0</b> |
| 4. Undesirable (or persistence) traits         | 7.0         |
| 5. Resource exploitation                       | 7.0         |
| 6. Reproduction                                | 2.0         |
| 7. Dispersal mechanisms                        | 1.0         |
| 8. Tolerance attributes                        | 3.0         |
| <b>C. Climate change</b>                       | <b>0.0</b>  |
| 9. Climate change                              | 0.0         |
| Answered Questions                             |             |
| <b>Total</b>                                   | <b>55</b>   |
| <b>A. Biogeography/Historical</b>              | <b>13</b>   |
| 1. Domestication/Cultivation                   | 3           |
| 2. Climate, distribution and introduction risk | 5           |
| 3. Invasive elsewhere                          | 5           |
| <b>B. Biology/Ecology</b>                      | <b>36</b>   |
| 4. Undesirable (or persistence) traits         | 12          |
| 5. Resource exploitation                       | 2           |
| 6. Reproduction                                | 7           |
| 7. Dispersal mechanisms                        | 9           |
| 8. Tolerance attributes                        | 6           |
| <b>C. Climate change</b>                       | <b>6</b>    |
| 9. Climate change                              | 6           |
| Sectors affected                               |             |
| <b>Commercial</b>                              | <b>8</b>    |
| <b>Environmental</b>                           | <b>13</b>   |
| <b>Species or population nuisance traits</b>   | <b>11</b>   |

| Thresholds     |             |
|----------------|-------------|
| <b>BRA</b>     | <b>-</b>    |
| <b>BRA+CCA</b> | <b>-</b>    |
| Confidence     |             |
| <b>BRA+CCA</b> | <b>0.60</b> |
| <b>BRA</b>     | <b>0.61</b> |
| <b>CCA</b>     | <b>0.50</b> |

| Date and Time       |  |
|---------------------|--|
| 04/06/2021 00:29:06 |  |

AS-ISK v2

| Taxon and Assessor details         |                                         |
|------------------------------------|-----------------------------------------|
| Category                           | Fishes and Lampreys (freshwater)        |
| Taxon name                         | <i>Coregonus peled</i>                  |
| Common name                        | peled                                   |
| Assessor                           | Tena Radocaj                            |
| Risk screening context             |                                         |
| Reason and socio-economic benefits |                                         |
| Risk assessment area               | Danube & Adriatic basins BA, HR, ME, RS |
| Taxonomy                           |                                         |
| Native range                       |                                         |
| Introduced range                   |                                         |
| URL                                |                                         |

|                                                |      | Response                                                                                                                                                                | Justification (references and/or other information) | Confidence                                                                                                                                                                                                                                                                                                                                                                                                                                      |           |
|------------------------------------------------|------|-------------------------------------------------------------------------------------------------------------------------------------------------------------------------|-----------------------------------------------------|-------------------------------------------------------------------------------------------------------------------------------------------------------------------------------------------------------------------------------------------------------------------------------------------------------------------------------------------------------------------------------------------------------------------------------------------------|-----------|
| A. Biogeography/Historical                     |      |                                                                                                                                                                         |                                                     |                                                                                                                                                                                                                                                                                                                                                                                                                                                 |           |
| 1. Domestication/Cultivation                   |      |                                                                                                                                                                         |                                                     |                                                                                                                                                                                                                                                                                                                                                                                                                                                 |           |
| 1                                              | 1.01 | Has the taxon been the subject of domestication (or cultivation) for at least 20 generations?                                                                           | No                                                  | Habeković, 1978, introduced                                                                                                                                                                                                                                                                                                                                                                                                                     | Very high |
| 2                                              | 1.02 | Is the taxon harvested in the wild and likely to be sold or used in its live form?                                                                                      | Yes                                                 | This species is grown for human consumption and Coregonus peled reared in intensive RAS. (Matousek, J., Prokesova, M., Novikava, K., Sebesta, R., Zuskova, E., & Stejskal, V. (2017). The effect of water oxygen saturation on growth and haematological profile of juvenile peled Coregonus peled (Gmelin). Aquaculture Research, 48(10), 5411-5417.)                                                                                          | High      |
| 3                                              | 1.03 | Does the taxon have invasive races, varieties, sub-taxa or congeners?                                                                                                   | No                                                  | Jevtić (1991) Izbor ozimice za otvorene i zatvorene vode. Ribarstvo Jugoslavije 46:14-26.                                                                                                                                                                                                                                                                                                                                                       | High      |
| 2. Climate, distribution and introduction risk |      |                                                                                                                                                                         |                                                     |                                                                                                                                                                                                                                                                                                                                                                                                                                                 |           |
| 4                                              | 2.01 | How similar are the climatic conditions of the Risk Assessment (RA) area and the taxon's native range?                                                                  | Medium                                              | The similarity between climatic conditions RA area and native range is medium. I use climatch.                                                                                                                                                                                                                                                                                                                                                  | Medium    |
| 5                                              | 2.02 | What is the quality of the climate matching data?                                                                                                                       | Medium                                              | The quality of the climatic matching data is medium.                                                                                                                                                                                                                                                                                                                                                                                            | Medium    |
| 6                                              | 2.03 | Is the taxon already present outside of captivity in the RA area?                                                                                                       | Yes                                                 | This species is present outside of captivity in the RA area.                                                                                                                                                                                                                                                                                                                                                                                    | Very high |
| 7                                              | 2.04 | How many potential vectors could the taxon use to enter in the RA area?                                                                                                 | None                                                | It is present in Croatia                                                                                                                                                                                                                                                                                                                                                                                                                        | Very high |
| 8                                              | 2.05 | Is the taxon currently found in close proximity to, and likely to enter into, the RA area in the near future (e.g. unintentional and intentional introductions)?        | Not applicable                                      | not applicable                                                                                                                                                                                                                                                                                                                                                                                                                                  | Very high |
| 3. Invasive elsewhere                          |      |                                                                                                                                                                         |                                                     |                                                                                                                                                                                                                                                                                                                                                                                                                                                 |           |
| 9                                              | 3.01 | Has the taxon become naturalised (established viable populations) outside its native range?                                                                             | Yes                                                 | Its importance increased with introduction to another countries such as Estonia, Lithuania, Latvia, Byelorussia, Poland, Germany, Finland, the Czech Republic, France and Japan. ( Matousek, J., Prokesova, M., Novikava, K., Sebesta, R., Zuskova, E., & Stejskal, V. (2017). The effect of water oxygen saturation on growth and haematological profile of juvenile peled Coregonus peled (Gmelin). Aquaculture Research, 48(10), 5411-5417.) | Very high |
| 10                                             | 3.02 | In the taxon's introduced range, are there known adverse impacts to wild stocks or commercial taxa?                                                                     | No                                                  | Personal opinion                                                                                                                                                                                                                                                                                                                                                                                                                                | Low       |
| 11                                             | 3.03 | In the taxon's introduced range, are there known adverse impacts to aquaculture?                                                                                        | No                                                  | Personal opinion                                                                                                                                                                                                                                                                                                                                                                                                                                | Low       |
| 12                                             | 3.04 | In the taxon's introduced range, are there known adverse impacts to ecosystem                                                                                           | No                                                  | Personal opinion                                                                                                                                                                                                                                                                                                                                                                                                                                | Low       |
| 13                                             | 3.05 | In the taxon's introduced range, are there known adverse socio-economic impacts?                                                                                        | No                                                  | Personal opinion, I don't any data about that                                                                                                                                                                                                                                                                                                                                                                                                   | Medium    |
| B. Biology/ Ecology                            |      |                                                                                                                                                                         |                                                     |                                                                                                                                                                                                                                                                                                                                                                                                                                                 |           |
| 4. Undesirable (or persistence) traits         |      |                                                                                                                                                                         |                                                     |                                                                                                                                                                                                                                                                                                                                                                                                                                                 |           |
| 14                                             | 4.01 | Is it likely that the taxon will be poisonous or pose other risks to human health?                                                                                      | No                                                  | no                                                                                                                                                                                                                                                                                                                                                                                                                                              | Very high |
| 15                                             | 4.02 | Is it likely that the taxon will smother one or more native taxa (that are not threatened or protected)?                                                                | No                                                  | Jevtić (1991) Izbor ozimice za otvorene i zatvorene vode. Ribarstvo Jugoslavije 46:14-26.                                                                                                                                                                                                                                                                                                                                                       | Low       |
| 16                                             | 4.03 | Are there any threatened or protected taxa that the non-native taxon would parasitise in the RA area?                                                                   | No                                                  | Jevtić (1991) Izbor ozimice za otvorene i zatvorene vode. Ribarstvo Jugoslavije 46:14-26.                                                                                                                                                                                                                                                                                                                                                       | Very high |
| 17                                             | 4.04 | Is the taxon adaptable in terms of climatic and other environmental conditions, thus enhancing its potential persistence if it has invaded or could invade the RA area? | Yes                                                 | Yes, this taxon is adapted on climate and environmental conditions, these species have self-sustaining populations in RA area. (Jevtić (1991) Izbor ozimice za otvorene i zatvorene vode. Ribarstvo Jugoslavije 46:14-26)                                                                                                                                                                                                                       | Low       |
| 18                                             | 4.05 | Is the taxon likely to disrupt food-web structure/function in aquatic ecosystems if it has invaded or is likely to invade the RA                                        | Yes                                                 | Maybe, it is possible there is a possibility that it will disrupt the nutritional structure                                                                                                                                                                                                                                                                                                                                                     | Low       |
| 19                                             | 4.06 | Is the taxon likely to exert adverse impacts on ecosystem services in the RA area?                                                                                      | No                                                  | no                                                                                                                                                                                                                                                                                                                                                                                                                                              | Medium    |
| 20                                             | 4.07 | Is it likely that the taxon will host, and/or act as a vector for, recognised pests and infectious agents that are endemic in the RA                                    | Yes                                                 | Yes, the taxon may be a host or vector of known pests and infectious agents endemic to RA area. Because in every area exist infectious agents and pests.                                                                                                                                                                                                                                                                                        | Medium    |
| 21                                             | 4.08 | Is it likely that the taxon will host, and/or act as a vector for, recognised pests and infectious agents that are absent from (novel to) the RA area?                  | Yes                                                 | Enteric Redmouth Disease, Bacterial diseases (Froese, R., and D. Pauly, editors. 2015. Coregonus peled (Gmelin, 1789). FishBase. Available: <a href="http://www.fishbase.org/summary/4687">http://www.fishbase.org/summary/4687</a> . July 2015)                                                                                                                                                                                                | Medium    |
| 22                                             | 4.09 | Is it likely that the taxon will achieve a body size that will make it more likely to be released from captivity?                                                       | Yes                                                 | Jevtić (1991) Izbor ozimice za otvorene i zatvorene vode. Ribarstvo Jugoslavije 46:14-26.                                                                                                                                                                                                                                                                                                                                                       | Very high |

|                                 |      |                                                                                                                                                                              |                |                                                                                                                                                                                                                                                                                                  |           |
|---------------------------------|------|------------------------------------------------------------------------------------------------------------------------------------------------------------------------------|----------------|--------------------------------------------------------------------------------------------------------------------------------------------------------------------------------------------------------------------------------------------------------------------------------------------------|-----------|
| 23                              | 4.10 | Is the taxon capable of sustaining itself in a range of water velocity conditions (e.g. versatile in habitat use)?                                                           | Yes            | Kottelat and Freyhof, 2007                                                                                                                                                                                                                                                                       | Very high |
| 24                              | 4.11 | Is it likely that the taxon's mode of existence (e.g. excretion of by-products) or behaviours (e.g. feeding) will reduce habitat quality for native taxa?                    | No             | Jevtić (1991) Izbor ozimice za otvorene i zatvorene vode. Ribarstvo Jugoslavije 46:14-26.                                                                                                                                                                                                        | High      |
| 25                              | 4.12 | Is the taxon likely to maintain a viable population even when present in low densities (or persisting in adverse conditions by way of a dormant form)?                       | Yes            | Jevtić (1991) Izbor ozimice za otvorene i zatvorene vode. Ribarstvo Jugoslavije 46:14-26.                                                                                                                                                                                                        | High      |
| <b>5. Resource exploitation</b> |      |                                                                                                                                                                              |                |                                                                                                                                                                                                                                                                                                  |           |
| 26                              | 5.01 | Is the taxon likely to consume threatened or protected native taxa in the RA area?                                                                                           | Yes            | It is possible that it consume endangered and protected native taxa in the RA area. If there are protected taxa in the RA area, the european whitefish will consume them, whether or not the taxon                                                                                               | Low       |
| 27                              | 5.02 | Is the taxon likely to sequester food resources (including nutrients) to the detriment of native taxa in the RA area?                                                        | Not applicable | not applicable                                                                                                                                                                                                                                                                                   | Very high |
| <b>6. Reproduction</b>          |      |                                                                                                                                                                              |                |                                                                                                                                                                                                                                                                                                  |           |
| 28                              | 6.01 | Is the taxon likely to exhibit parental care and/or to reduce age-at-maturity in response to environmental conditions?                                                       | No             | Jevtić (1991) Izbor ozimice za otvorene i zatvorene vode. Ribarstvo Jugoslavije 46:14-26.                                                                                                                                                                                                        | Very high |
| 29                              | 6.02 | Is the taxon likely to produce viable gametes or propagules (in the RA area)?                                                                                                | Yes            | Jevtić (1991) Izbor ozimice za otvorene i zatvorene vode. Ribarstvo Jugoslavije 46:14-26.                                                                                                                                                                                                        | Very high |
| 30                              | 6.03 | Is the taxon likely to hybridise naturally with native taxa?                                                                                                                 | No             | Personal opinion                                                                                                                                                                                                                                                                                 | High      |
| 31                              | 6.04 | Is the taxon likely to be hermaphroditic or to display asexual reproduction?                                                                                                 | No             | Personal opinion                                                                                                                                                                                                                                                                                 | Very high |
| 32                              | 6.05 | Is the taxon dependent on the presence of another taxon (or specific habitat features) to complete its life cycle?                                                           | No             | Personal opinion                                                                                                                                                                                                                                                                                 | Very high |
| 33                              | 6.06 | Is the taxon known (or likely) to produce a large number of propagules or offspring within a short time span (e.g. < 1 year)?                                                | Yes            | Jevtić (1991) Izbor ozimice za otvorene i zatvorene vode. Ribarstvo Jugoslavije 46:14-26.                                                                                                                                                                                                        | Very high |
| 34                              | 6.07 | How many time units (days, months, years) does the taxon require to reach the age-at-first-reproduction?                                                                     | 3              | Freyhof, J. & Kottelat, M. 2008. Coregonus peled . The IUCN Red List of Threatened Species 2008: e.T5374A11125006. <a href="https://dx.doi.org/10.2305/IUCN.UK.2008.RLTS.T5374A11125006.en">https://dx.doi.org/10.2305/IUCN.UK.2008.RLTS.T5374A11125006.en</a> . Downloaded on 05 February 2020. | High      |
| <b>7. Dispersal mechanisms</b>  |      |                                                                                                                                                                              |                |                                                                                                                                                                                                                                                                                                  |           |
| 35                              | 7.01 | How many potential internal vectors/pathways could the taxon use to disperse within the RA area (with suitable vectors)?                                                     | >1             | 1. accidental introduction, 2. human-mediated 3. natural spread via natural and manmade watercourses                                                                                                                                                                                             | Medium    |
| 36                              | 7.02 | Will any of these vectors/pathways bring the taxon in close proximity to one or more protected areas (e.g. MCZ, MPA, SSSI)?                                                  | Yes            | It is present in protected area.                                                                                                                                                                                                                                                                 | Low       |
| 37                              | 7.03 | Does the taxon have a means of actively attaching itself to hard substrata (e.g. ship hulls, pilings, buoys) such that it enhances the likelihood of dispersal?              | No             | no                                                                                                                                                                                                                                                                                               | High      |
| 38                              | 7.04 | Is natural dispersal of the taxon likely to occur as eggs (for animals) or as propagules (for plants: seeds, spores) in the RA area?                                         | No             | Jevtić (1991) Izbor ozimice za otvorene i zatvorene vode. Ribarstvo Jugoslavije 46:14-26.                                                                                                                                                                                                        | High      |
| 39                              | 7.05 | Is natural dispersal of the taxon likely to occur as larvae/juveniles (for animals) or as fragments/seedlings (for plants) in the RA area?                                   | No             | Jevtić (1991) Izbor ozimice za otvorene i zatvorene vode. Ribarstvo Jugoslavije 46:14-26.                                                                                                                                                                                                        | Low       |
| 40                              | 7.06 | Are older life stages of the taxon likely to migrate in the RA area for reproduction?                                                                                        | No             | Personal opinion                                                                                                                                                                                                                                                                                 | Low       |
| 41                              | 7.07 | Are propagules or eggs of the taxon likely to be dispersed in the RA area by other animals?                                                                                  | No             | Personal opinion                                                                                                                                                                                                                                                                                 | Very high |
| 42                              | 7.08 | Is dispersal of the taxon along any of the vectors/pathways mentioned in the previous seven questions (35-41; i.e. both unintentional or intentional) likely to be           | Yes            | There is a possibility of a high rate of spread of taxa. Eg. if a fertilized individual enters a new area by any means of expansion.                                                                                                                                                             | Low       |
| 43                              | 7.09 | Is dispersal of the taxon density dependent?                                                                                                                                 | No             | Personal opinion                                                                                                                                                                                                                                                                                 | High      |
| <b>8. Tolerance attributes</b>  |      |                                                                                                                                                                              |                |                                                                                                                                                                                                                                                                                                  |           |
| 44                              | 8.01 | Is the taxon able to withstand being out of water for extended periods (e.g. minimum of one or more hours) at some stage of its life cycle?                                  | No             | Personal opinion                                                                                                                                                                                                                                                                                 | Very high |
| 45                              | 8.02 | Is the taxon tolerant of a wide range of water quality conditions relevant to that taxon? [In the Justification field, indicate the relevant water quality variable(s) being | No             | Jevtić (1991) Izbor ozimice za otvorene i zatvorene vode. Ribarstvo Jugoslavije 46:14-26.                                                                                                                                                                                                        | High      |
| 46                              | 8.03 | Can the taxon be controlled or eradicated in the wild with chemical, biological, or other agents/means?                                                                      | Not applicable | Personal opinion                                                                                                                                                                                                                                                                                 | High      |
| 47                              | 8.04 | Is the taxon likely to tolerate or benefit from environmental/human disturbance?                                                                                             | No             | Jevtić (1991) Izbor ozimice za otvorene i zatvorene vode. Ribarstvo Jugoslavije 46:14-26.                                                                                                                                                                                                        | Very high |
| 48                              | 8.05 | Is the taxon able to tolerate salinity levels that are higher or lower than those found in its usual environment?                                                            | No             | Kottelat and Freyhof, 2007                                                                                                                                                                                                                                                                       | High      |
| 49                              | 8.06 | Are there effective natural enemies (predators) of the taxon present in the RA                                                                                               | No             | Personal opinion                                                                                                                                                                                                                                                                                 | High      |
| <b>C. Climate change</b>        |      |                                                                                                                                                                              |                |                                                                                                                                                                                                                                                                                                  |           |
| <b>9. Climate change</b>        |      |                                                                                                                                                                              |                |                                                                                                                                                                                                                                                                                                  |           |
| 50                              | 9.01 | Under the predicted future climatic conditions, are the risks of entry into the RA area posed by the taxon likely to increase, decrease or not change?                       | Not applicable | not applicable                                                                                                                                                                                                                                                                                   | Very high |

|    |      |                                                                                                                                                              |           |                                                                                                                                                                                                                                                                          |        |
|----|------|--------------------------------------------------------------------------------------------------------------------------------------------------------------|-----------|--------------------------------------------------------------------------------------------------------------------------------------------------------------------------------------------------------------------------------------------------------------------------|--------|
| 51 | 9.02 | Under the predicted future climatic conditions, are the risks of establishment posed by the taxon likely to increase, decrease or not change?                | Decrease  | Considering climate change, population in the RA area is likely to decline, as this species does not tolerate high temperatures.                                                                                                                                         | Low    |
| 52 | 9.03 | Under the predicted future climatic conditions, are the risks of dispersal within the RA area posed by the taxon likely to increase, decrease or not change? | Decrease  | The risk of taxa spreading in the RA area is declining, currently this species in Croatia resides in only one reservoir, I believe that under the influence of climate change it will not spread further, but its number will decline due to differences in temperature. | Low    |
| 53 | 9.04 | Under the predicted future climatic conditions, what is the likely magnitude of future potential impacts on biodiversity and/or ecological integrity/status? | No change | no                                                                                                                                                                                                                                                                       | Low    |
| 54 | 9.05 | Under the predicted future climatic conditions, what is the likely magnitude of future potential impacts on ecosystem structure and/or function?             | No change | No impact                                                                                                                                                                                                                                                                | Medium |
| 55 | 9.06 | Under the predicted future climatic conditions, what is the likely magnitude of future potential impacts on ecosystem services/socio-economic factors?       | No change | There will be no impact on ecosystem                                                                                                                                                                                                                                     | Low    |

| Statistics                                     |             |
|------------------------------------------------|-------------|
| Scores                                         |             |
| <b>BRA</b>                                     | <b>10.5</b> |
| <b>BRA Outcome</b>                             | <b>-</b>    |
| <b>BRA+CCA</b>                                 | <b>6.5</b>  |
| <b>BRA+CCA Outcome</b>                         | <b>-</b>    |
| Score partition                                |             |
| <b>A. Biogeography/Historical</b>              | <b>1.5</b>  |
| 1. Domestication/Cultivation                   | 0.0         |
| 2. Climate, distribution and introduction risk | 0.0         |
| 3. Invasive elsewhere                          | 1.5         |
| <b>B. Biology/Ecology</b>                      | <b>9.0</b>  |
| 4. Undesirable (or persistence) traits         | 7.0         |
| 5. Resource exploitation                       | 5.0         |
| 6. Reproduction                                | 1.0         |
| 7. Dispersal mechanisms                        | -2.0        |
| 8. Tolerance attributes                        | -2.0        |
| <b>C. Climate change</b>                       | <b>-4.0</b> |
| 9. Climate change                              | -4.0        |
| Answered Questions                             |             |
| <b>Total</b>                                   | <b>55</b>   |
| <b>A. Biogeography/Historical</b>              | <b>13</b>   |
| 1. Domestication/Cultivation                   | 3           |
| 2. Climate, distribution and introduction risk | 5           |
| 3. Invasive elsewhere                          | 5           |
| <b>B. Biology/Ecology</b>                      | <b>36</b>   |
| 4. Undesirable (or persistence) traits         | 12          |
| 5. Resource exploitation                       | 2           |
| 6. Reproduction                                | 7           |
| 7. Dispersal mechanisms                        | 9           |
| 8. Tolerance attributes                        | 6           |
| <b>C. Climate change</b>                       | <b>6</b>    |
| 9. Climate change                              | 6           |
| Sectors affected                               |             |
| <b>Commercial</b>                              | <b>3</b>    |
| <b>Environmental</b>                           | <b>7</b>    |
| <b>Species or population nuisance traits</b>   | <b>-1</b>   |

| Thresholds     |             |
|----------------|-------------|
| <b>BRA</b>     | <b>-</b>    |
| <b>BRA+CCA</b> | <b>-</b>    |
| Confidence     |             |
| <b>BRA+CCA</b> | <b>0.66</b> |
| <b>BRA</b>     | <b>0.69</b> |
| <b>CCA</b>     | <b>0.42</b> |

| Date and Time       |  |
|---------------------|--|
| 01/06/2020 11:50:54 |  |

## AS-ISK v2

| Taxon and Assessor details         |                                         |
|------------------------------------|-----------------------------------------|
| Category                           | Fishes and Lampreys (freshwater)        |
| Taxon name                         | <i>Hucho hucho</i>                      |
| Common name                        | huchen                                  |
| Assessor                           | Ana Marić                               |
| Risk screening context             |                                         |
| Reason and socio-economic benefits |                                         |
| Risk assessment area               | Danube & Adriatic basins BA, HR, ME, RS |
| Taxonomy                           |                                         |
| Native range                       |                                         |
| Introduced range                   |                                         |
| URL                                |                                         |

|                                                |      | Response                                                                                                                                                                | Justification (references and/or other information) | Confidence                                                                                                                                                                                                                                |           |
|------------------------------------------------|------|-------------------------------------------------------------------------------------------------------------------------------------------------------------------------|-----------------------------------------------------|-------------------------------------------------------------------------------------------------------------------------------------------------------------------------------------------------------------------------------------------|-----------|
| A. Biogeography/Historical                     |      |                                                                                                                                                                         |                                                     |                                                                                                                                                                                                                                           |           |
| 1. Domestication/Cultivation                   |      |                                                                                                                                                                         |                                                     |                                                                                                                                                                                                                                           |           |
| 1                                              | 1.01 | Has the taxon been the subject of domestication (or cultivation) for at least 20 generations?                                                                           | Yes                                                 | Some notes to the farming and conservation of tile Danube salmon (Hucho hucho)* Mathias Jungwirth 1978 For conservation purposes, not easily reared.                                                                                      | High      |
| 2                                              | 1.02 | Is the taxon harvested in the wild and likely to be sold or used in its live form?                                                                                      | Yes                                                 | NAREdba o merama za ocuvanje i zastitu ribljeg fonda. "Službeni glasnik RS", br. 104/2009 Na osnovu člana 21. stav 2. Zakona o zaštiti i održivom korišćenju ribljeg fonda                                                                | Very high |
| 3                                              | 1.03 | Does the taxon have invasive races, varieties, sub-taxa or congeners?                                                                                                   | No                                                  | European Red List of Freshwater Fishes. Freyhor and Brooks. 2011                                                                                                                                                                          | Very high |
| 2. Climate, distribution and introduction risk |      |                                                                                                                                                                         |                                                     |                                                                                                                                                                                                                                           |           |
| 4                                              | 2.01 | How similar are the climatic conditions of the Risk Assessment (RA) area and the taxon's native range?                                                                  | High                                                | Same drainge basin, same range                                                                                                                                                                                                            | Very high |
| 5                                              | 2.02 | What is the quality of the climate matching data?                                                                                                                       | High                                                | Climach                                                                                                                                                                                                                                   | High      |
| 6                                              | 2.03 | Is the taxon already present outside of captivity in the RA area?                                                                                                       | Yes                                                 | http://www.politika.rs/sr/clanak/268003/Drugi-zivot-mladice                                                                                                                                                                               | Very high |
| 7                                              | 2.04 | How many potential vectors could the taxon use to enter in the RA area?                                                                                                 | One                                                 | Stocking                                                                                                                                                                                                                                  | High      |
| 8                                              | 2.05 | Is the taxon currently found in close proximity to, and likely to enter into, the RA area in the near future (e.g. unintentional and intentional introductions)?        | Yes                                                 | Zaštita ihtiofaune i zakonska regulativa u Srbiji Stevan Maletin, Aleksandar Matić , Miroslav Čirković Nikolina Milošević1 Željka Jurakić1                                                                                                | High      |
| 3. Invasive elsewhere                          |      |                                                                                                                                                                         |                                                     |                                                                                                                                                                                                                                           |           |
| 9                                              | 3.01 | Has the taxon become naturalised (established viable populations) outside its                                                                                           | Yes                                                 | Past and present of and perspectives for the DANube huchen Hucho hucho in the Danube basin. Witkovski et al. 2013.                                                                                                                        | High      |
| 10                                             | 3.02 | In the taxon's introduced range, are there known adverse impacts to wild stocks or commercial taxa?                                                                     | No                                                  | Past and present of and perspectives for the Danube huchen Hucho hucho in the Danube basin. Witkovski et al. 2013.                                                                                                                        | Very high |
| 11                                             | 3.03 | In the taxon's introduced range, are there known adverse impacts to aquaculture?                                                                                        | No                                                  | Past and present of and perspectives for the Danube huchen Hucho hucho in the Danube basin. Witkovski et al. 2013.                                                                                                                        | Very high |
| 12                                             | 3.04 | In the taxon's introduced range, are there known adverse impacts to ecosystem                                                                                           | No                                                  | Past and present of and perspectives for the Danube huchen Hucho hucho in the Danube basin. Witkovski et al. 2013.                                                                                                                        | Very high |
| 13                                             | 3.05 | In the taxon's introduced range, are there known adverse socio-economic impacts?                                                                                        | No                                                  | Past and present of and perspectives for the Danube huchen Hucho hucho in the Danube basin. Witkovski et al. 2013.                                                                                                                        | Very high |
| B. Biology/Ecology                             |      |                                                                                                                                                                         |                                                     |                                                                                                                                                                                                                                           |           |
| 4. Undesirable (or persistence) traits         |      |                                                                                                                                                                         |                                                     |                                                                                                                                                                                                                                           |           |
| 14                                             | 4.01 | Is it likely that the taxon will be poisonous or pose other risks to human health?                                                                                      | No                                                  | Kottelat, M. and J. Freyhof, 2007. Handbook of European freshwater fishes. Publications Kottelat, Cornol and Freyhof,                                                                                                                     | Very high |
| 15                                             | 4.02 | Is it likely that the taxon will smother one or more native taxa (that are not threatened or protected)?                                                                | No                                                  | Kottelat, M. and J. Freyhof, 2007. Handbook of European freshwater fishes. Publications Kottelat, Cornol and Freyhof, Berlin. 646 pp                                                                                                      | Very high |
| 16                                             | 4.03 | Are there any threatened or protected taxa that the non-native taxon would parasitise in the RA area?                                                                   | No                                                  | Kottelat, M. and J. Freyhof, 2007. Handbook of European freshwater fishes. Publications Kottelat, Cornol and Freyhof, Berlin. 646 pp                                                                                                      | Very high |
| 17                                             | 4.04 | Is the taxon adaptable in terms of climatic and other environmental conditions, thus enhancing its potential persistence if it has invaded or could invade the RA area? | No                                                  | Past and present of and perspectives for the Danube huchen Hucho hucho in the Danube basin. Witkovski et al. 2013.                                                                                                                        | Very high |
| 18                                             | 4.05 | Is the taxon likely to disrupt food-web structure/function in aquatic ecosystems if it has invaded or is likely to invade the RA                                        | No                                                  | Past and present of and perspectives for the Danube huchen Hucho hucho in the Danube basin. Witkovski et al. 2013.                                                                                                                        | Very high |
| 19                                             | 4.06 | Is the taxon likely to exert adverse impacts on ecosystem services in the RA area?                                                                                      | No                                                  | Past and present of and perspectives for the Danube huchen Hucho hucho in the Danube basin. Witkovski et al. 2013.                                                                                                                        | Very high |
| 20                                             | 4.07 | Is it likely that the taxon will host, and/or act as a vector for, recognised pests and infectious agents that are endemic in the RA                                    | Yes                                                 | Connectivity Solution for huchen Hucho hucho (L.) in human-altered habitats. Simonovic et al. 2015                                                                                                                                        | High      |
| 21                                             | 4.08 | Is it likely that the taxon will host, and/or act as a vector for, recognised pests and infectious agents that are absent from (novel to) the RA area?                  | No                                                  | Past and present of and perspectives for the Danube huchen, Hucho hucho (L.), in the Danube basin Andrzej Witkowski, Aleksandar Bajjae, Tomislav Treer, Aleksandar Hegediš, Saša Mariæ, Nikica Šprem, Marina Piria, Andrzej Kapusta. 2013 | Very high |
| 22                                             | 4.09 | Is it likely that the taxon will achieve a body size that will make it more likely to be released from captivity?                                                       | Yes                                                 | Kottelat, M. and J. Freyhof, 2007. Handbook of European freshwater fishes. Publications Kottelat, Cornol and Freyhof, Berlin. 646 pp                                                                                                      | High      |
| 23                                             | 4.10 | Is the taxon capable of sustaining itself in a range of water velocity conditions (e.g. versatile in habitat use)?                                                      | Yes                                                 | Kottelat, M. and J. Freyhof, 2007. Handbook of European freshwater fishes. Publications Kottelat, Cornol and Freyhof, Berlin. 646 pp                                                                                                      | High      |
| 24                                             | 4.11 | Is it likely that the taxon's mode of existence (e.g. excretion of by-products) or behaviours (e.g. feeding) will reduce habitat quality for native taxa?               | No                                                  | Kottelat, M. and J. Freyhof, 2007. Handbook of European freshwater fishes. Publications Kottelat, Cornol and Freyhof, Berlin. 646 pp                                                                                                      | Very high |

|                                 |      |                                                                                                                                                                              |                |                                                                                                                                                                                                                                          |           |
|---------------------------------|------|------------------------------------------------------------------------------------------------------------------------------------------------------------------------------|----------------|------------------------------------------------------------------------------------------------------------------------------------------------------------------------------------------------------------------------------------------|-----------|
| 25                              | 4.12 | Is the taxon likely to maintain a viable population even when present in low densities (or persisting in adverse conditions by way of a dormant form)?                       | No             | The history of huchen in Poland-distribution, restoration and conservation. Witkovski et al. 2013                                                                                                                                        | Very high |
| <b>5. Resource exploitation</b> |      |                                                                                                                                                                              |                |                                                                                                                                                                                                                                          |           |
| 26                              | 5.01 | Is the taxon likely to consume threatened or protected native taxa in the RA area?                                                                                           | Yes            | Kottelat, M. and J. Freyhof, 2007. Handbook of European freshwater fishes. Publications Kottelat, Cornol and Freyhof,                                                                                                                    | High      |
| 27                              | 5.02 | Is the taxon likely to sequester food resources (including nutrients) to the detriment of native taxa in the RA area?                                                        | No             | The history of huchen in Poland-distribution, restoration and conservation. Witkovski et al. 2013                                                                                                                                        | High      |
| <b>6. Reproduction</b>          |      |                                                                                                                                                                              |                |                                                                                                                                                                                                                                          |           |
| 28                              | 6.01 | Is the taxon likely to exhibit parental care and/or to reduce age-at-maturity in response to environmental conditions?                                                       | No             | The history of huchen in Poland-distribution, restoration and conservation. Witkovski et al. 2013                                                                                                                                        | High      |
| 29                              | 6.02 | Is the taxon likely to produce viable gametes or propagules (in the RA area)?                                                                                                | Yes            | Past and present of and perspectives for the Danube huchen, Hucho hucho (L.), in the Danube basin Andrzej Witkowski, Aleksandar Bajić, Tomislav Treer, Aleksandar Hegediš, Saša Marić, Nikica Šprem, Marina Piria, Andrzej Kapusta. 2013 | Very high |
| 30                              | 6.03 | Is the taxon likely to hybridise naturally with native taxa?                                                                                                                 | No             | Kottelat, M. and J. Freyhof, 2007. Handbook of European freshwater fishes. Publications Kottelat, Cornol and Freyhof,                                                                                                                    | High      |
| 31                              | 6.04 | Is the taxon likely to be hermaphroditic or to display asexual reproduction?                                                                                                 | No             | <a href="http://www.politika.rs/sr/clanak/268003/Drugi-zivot-mladice">http://www.politika.rs/sr/clanak/268003/Drugi-zivot-mladice</a>                                                                                                    | Very high |
| 32                              | 6.05 | Is the taxon dependent on the presence of another taxon (or specific habitat features) to complete its life cycle?                                                           | Yes            | Kottelat, M. and J. Freyhof, 2007. Handbook of European freshwater fishes. Publications Kottelat, Cornol and Freyhof, Berlin. 646 pp                                                                                                     | Very high |
| 33                              | 6.06 | Is the taxon known (or likely) to produce a large number of propagules or offspring within a short time span (e.g. < 1 year)?                                                | Yes            | Kottelat, M. and J. Freyhof, 2007. Handbook of European freshwater fishes. Publications Kottelat, Cornol and Freyhof, Berlin. 646 pp                                                                                                     | High      |
| 34                              | 6.07 | How many time units (days, months, years) does the taxon require to reach the age-at-first-reproduction?                                                                     | 4              | Some notes to the farming and conservation of tile Danube salmon (Hucho hucho)* Mathias Jungwirth 1978.                                                                                                                                  | Very high |
| <b>7. Dispersal mechanisms</b>  |      |                                                                                                                                                                              |                |                                                                                                                                                                                                                                          |           |
| 35                              | 7.01 | How many potential internal vectors/pathways could the taxon use to disperse within the RA area (with suitable)                                                              | One            | Stocking. The history of huchen in Poland-distribution, restoration and conservation. Witkovski et al. 2013                                                                                                                              | Very high |
| 36                              | 7.02 | Will any of these vectors/pathways bring the taxon in close proximity to one or more protected areas (e.g. MCZ, MPA, SSSI)?                                                  | Yes            | Past and present of and perspectives for the Danube huchen, Hucho hucho (L.), in the Danube basin Andrzej Witkowski, Aleksandar Bajić, Tomislav Treer, Aleksandar Hegediš, Saša Marić, Nikica Šprem, Marina Piria, Andrzej Kapusta. 2013 | High      |
| 37                              | 7.03 | Does the taxon have a means of actively attaching itself to hard substrata (e.g. ship hulls, pilings, buoys) such that it enhances the likelihood of dispersal?              | No             | Kottelat, M. and J. Freyhof, 2007. Handbook of European freshwater fishes. Publications Kottelat, Cornol and Freyhof, Berlin. 646 pp                                                                                                     | Very high |
| 38                              | 7.04 | Is natural dispersal of the taxon likely to occur as eggs (for animals) or as propagules (for plants: seeds, spores) in the RA area?                                         | No             | Kottelat, M. and J. Freyhof, 2007. Handbook of European freshwater fishes. Publications Kottelat, Cornol and Freyhof, Berlin. 646 pp                                                                                                     | Very high |
| 39                              | 7.05 | Is natural dispersal of the taxon likely to occur as larvae/juveniles (for animals) or as fragments/seedlings (for plants) in the RA area?                                   | Yes            | Kottelat, M. and J. Freyhof, 2007. Handbook of European freshwater fishes. Publications Kottelat, Cornol and Freyhof, Berlin. 646 pp                                                                                                     | High      |
| 40                              | 7.06 | Are older life stages of the taxon likely to migrate in the RA area for reproduction?                                                                                        | Yes            | Kottelat, M. and J. Freyhof, 2007. Handbook of European freshwater fishes. Publications Kottelat, Cornol and Freyhof,                                                                                                                    | High      |
| 41                              | 7.07 | Are propagules or eggs of the taxon likely to be dispersed in the RA area by other animals?                                                                                  | No             | Kottelat, M. and J. Freyhof, 2007. Handbook of European freshwater fishes. Publications Kottelat, Cornol and Freyhof,                                                                                                                    | High      |
| 42                              | 7.08 | Is dispersal of the taxon along any of the vectors/pathways mentioned in the previous seven questions (35–41; i.e. both unintentional or intentional) likely to be           | No             | The history of huchen in Poland-distribution, restoration and conservation. Witkovski et al. 2013                                                                                                                                        | Very high |
| 43                              | 7.09 | Is dispersal of the taxon density dependent?                                                                                                                                 | No             | The history of huchen in Poland-distribution, restoration and conservation. Witkovski et al. 2013                                                                                                                                        | Medium    |
| <b>8. Tolerance attributes</b>  |      |                                                                                                                                                                              |                |                                                                                                                                                                                                                                          |           |
| 44                              | 8.01 | Is the taxon able to withstand being out of water for extended periods (e.g. minimum of one or more hours) at some stage of its life cycle?                                  | No             | The history of huchen in Poland-distribution, restoration and conservation. Witkovski et al. 2013                                                                                                                                        | Very high |
| 45                              | 8.02 | Is the taxon tolerant of a wide range of water quality conditions relevant to that taxon? [In the Justification field, indicate the relevant water quality variable(s) being | No             | The history of huchen in Poland-distribution, restoration and conservation. Witkovski et al. 2013                                                                                                                                        | Very high |
| 46                              | 8.03 | Can the taxon be controlled or eradicated in the wild with chemical, biological, or other agents/means?                                                                      | Not applicable | European Red List of Freshwater Fishes. Freyhof and Brooks. 2011.                                                                                                                                                                        | Very high |
| 47                              | 8.04 | Is the taxon likely to tolerate or benefit from environmental/human disturbance?                                                                                             | No             | The history of huchen in Poland-distribution, restoration and conservation. Witkovski et al. 2013                                                                                                                                        | High      |
| 48                              | 8.05 | Is the taxon able to tolerate salinity levels that are higher or lower than those found in its usual environment?                                                            | No             | The history of huchen in Poland-distribution, restoration and conservation. Witkovski et al. 2013                                                                                                                                        | Medium    |
| 49                              | 8.06 | Are there effective natural enemies (predators) of the taxon present in the RA                                                                                               | Yes            | Kottelat, M. and J. Freyhof, 2007. Handbook of European freshwater fishes. Publications Kottelat, Cornol and Freyhof,                                                                                                                    | High      |
| <b>C. Climate change</b>        |      |                                                                                                                                                                              |                |                                                                                                                                                                                                                                          |           |
| <b>9. Climate change</b>        |      |                                                                                                                                                                              |                |                                                                                                                                                                                                                                          |           |
| 50                              | 9.01 | Under the predicted future climatic conditions, are the risks of entry into the RA area posed by the taxon likely to increase, decrease or not change?                       | No change      | Past and present of and perspectives for the Danube huchen, Hucho hucho (L.), in the Danube basin Andrzej Witkowski, Aleksandar Bajić, Tomislav Treer, Aleksandar Hegediš, Saša Marić, Nikica Šprem, Marina Piria, Andrzej Kapusta. 2013 | High      |
| 51                              | 9.02 | Under the predicted future climatic conditions, are the risks of establishment posed by the taxon likely to increase, decrease or not change?                                | Decrease       | Past and present of and perspectives for the Danube huchen, Hucho hucho (L.), in the Danube basin Andrzej Witkowski, Aleksandar Bajić, Tomislav Treer, Aleksandar Hegediš, Saša Marić, Nikica Šprem, Marina Piria, Andrzej Kapusta. 2013 | Very high |

|    |      |                                                                                                                                                              |          |                                                                                                                                                                                                                                         |           |
|----|------|--------------------------------------------------------------------------------------------------------------------------------------------------------------|----------|-----------------------------------------------------------------------------------------------------------------------------------------------------------------------------------------------------------------------------------------|-----------|
| 52 | 9.03 | Under the predicted future climatic conditions, are the risks of dispersal within the RA area posed by the taxon likely to increase, decrease or not change? | Decrease | Past and present of and perspectives for the Danube hucho, Hucho hucho (L.), in the Danube basin Andrzej Witkowski, Aleksandar Bajić, Tomislav Treer, Aleksandar Hegediš, Saša Marić, Nikica Šprem, Marina Piria, Andrzej Kapusta. 2013 | Very high |
| 53 | 9.04 | Under the predicted future climatic conditions, what is the likely magnitude of future potential impacts on biodiversity and/or ecological integrity/status? | Lower    | Past and present of and perspectives for the Danube hucho, Hucho hucho (L.), in the Danube basin Andrzej Witkowski, Aleksandar Bajić, Tomislav Treer, Aleksandar Hegediš, Saša Marić, Nikica Šprem, Marina Piria, Andrzej Kapusta. 2013 | High      |
| 54 | 9.05 | Under the predicted future climatic conditions, what is the likely magnitude of future potential impacts on ecosystem structure and/or function?             | Lower    | Past and present of and perspectives for the Danube hucho, Hucho hucho (L.), in the Danube basin Andrzej Witkowski, Aleksandar Bajić, Tomislav Treer, Aleksandar Hegediš, Saša Marić, Nikica Šprem, Marina Piria, Andrzej Kapusta. 2013 | High      |
| 55 | 9.06 | Under the predicted future climatic conditions, what is the likely magnitude of future potential impacts on ecosystem services/socio-economic factors?       | Lower    | Past and present of and perspectives for the Danube hucho, Hucho hucho (L.), in the Danube basin Andrzej Witkowski, Aleksandar Bajić, Tomislav Treer, Aleksandar Hegediš, Saša Marić, Nikica Šprem, Marina Piria, Andrzej Kapusta. 2013 | High      |

| Statistics                                     |       |
|------------------------------------------------|-------|
| Scores                                         |       |
| BRA                                            | 6.0   |
| BRA Outcome                                    | -     |
| BRA+CCA                                        | -4.0  |
| BRA+CCA Outcome                                | -     |
| Score partition                                |       |
| A. Biogeography/Historical                     | 5.0   |
| 1. Domestication/Cultivation                   | 2.0   |
| 2. Climate, distribution and introduction risk | 1.0   |
| 3. Invasive elsewhere                          | 2.0   |
| B. Biology/Ecology                             | 1.0   |
| 4. Undesirable (or persistence) traits         | 2.0   |
| 5. Resource exploitation                       | 5.0   |
| 6. Reproduction                                | -2.0  |
| 7. Dispersal mechanisms                        | 0.0   |
| 8. Tolerance attributes                        | -4.0  |
| C. Climate change                              | -10.0 |
| 9. Climate change                              | -10.0 |
| Answered Questions                             |       |
| Total                                          | 55    |
| A. Biogeography/Historical                     | 13    |
| 1. Domestication/Cultivation                   | 3     |
| 2. Climate, distribution and introduction risk | 5     |
| 3. Invasive elsewhere                          | 5     |
| B. Biology/Ecology                             | 36    |
| 4. Undesirable (or persistence) traits         | 12    |
| 5. Resource exploitation                       | 2     |
| 6. Reproduction                                | 7     |
| 7. Dispersal mechanisms                        | 9     |
| 8. Tolerance attributes                        | 6     |
| C. Climate change                              | 6     |
| 9. Climate change                              | 6     |
| Sectors affected                               |       |
| Commercial                                     | 2     |
| Environmental                                  | 2     |
| Species or population nuisance traits          | -6    |

| Thresholds |      |
|------------|------|
| BRA        | -    |
| BRA+CCA    | -    |
| Confidence |      |
| BRA+CCA    | 0.88 |
| BRA        | 0.88 |
| CCA        | 0.83 |

| Date and Time       |
|---------------------|
| 16/05/2021 18:30:57 |



## AS-ISK v2

| Taxon and Assessor details         |                                         |
|------------------------------------|-----------------------------------------|
| Category                           | Fishes and Lampreys (freshwater)        |
| Taxon name                         | <i>Hucho hucho</i>                      |
| Common name                        | huchen                                  |
| Assessor                           | Ivan Špelić                             |
| Risk screening context             |                                         |
| Reason and socio-economic benefits |                                         |
| Risk assessment area               | Danube & Adriatic basins BA, HR, ME, RS |
| Taxonomy                           |                                         |
| Native range                       |                                         |
| Introduced range                   |                                         |
| URL                                |                                         |

|                                                |      | Response                                                                                                                                                                | Justification (references and/or other information) | Confidence                                                                                                                                                                                                                                                                                                                                                                                                                                                                                                                                                                                                                                                                                                                                                                                                                                                                                                 |           |
|------------------------------------------------|------|-------------------------------------------------------------------------------------------------------------------------------------------------------------------------|-----------------------------------------------------|------------------------------------------------------------------------------------------------------------------------------------------------------------------------------------------------------------------------------------------------------------------------------------------------------------------------------------------------------------------------------------------------------------------------------------------------------------------------------------------------------------------------------------------------------------------------------------------------------------------------------------------------------------------------------------------------------------------------------------------------------------------------------------------------------------------------------------------------------------------------------------------------------------|-----------|
| A. Biogeography/Historical                     |      |                                                                                                                                                                         |                                                     |                                                                                                                                                                                                                                                                                                                                                                                                                                                                                                                                                                                                                                                                                                                                                                                                                                                                                                            |           |
| 1. Domestication/Cultivation                   |      |                                                                                                                                                                         |                                                     |                                                                                                                                                                                                                                                                                                                                                                                                                                                                                                                                                                                                                                                                                                                                                                                                                                                                                                            |           |
| 1                                              | 1.01 | Has the taxon been the subject of domestication (or cultivation) for at least 20 generations?                                                                           | Yes                                                 | For stocking purposes (Muhamedagić S., Habibović E. 2013 – The State and Perspective of Danube huchen (Hucho hucho) in Bosnia and Herzegovina– Arch. Pol. Fish. 21: 155-160).                                                                                                                                                                                                                                                                                                                                                                                                                                                                                                                                                                                                                                                                                                                              | Very high |
| 2                                              | 1.02 | Is the taxon harvested in the wild and likely to be sold or used in its live form?                                                                                      | Yes                                                 | For stocking purposes (Muhamedagić S., Habibović E. 2013 – The State and Perspective of Danube huchen (Hucho hucho) in Bosnia and Herzegovina– Arch. Pol. Fish. 21: 155-160), personal                                                                                                                                                                                                                                                                                                                                                                                                                                                                                                                                                                                                                                                                                                                     | Very high |
| 3                                              | 1.03 | Does the taxon have invasive races, varieties, sub-taxa or congeners?                                                                                                   | No                                                  | No such species.                                                                                                                                                                                                                                                                                                                                                                                                                                                                                                                                                                                                                                                                                                                                                                                                                                                                                           | Very high |
| 2. Climate, distribution and introduction risk |      |                                                                                                                                                                         |                                                     |                                                                                                                                                                                                                                                                                                                                                                                                                                                                                                                                                                                                                                                                                                                                                                                                                                                                                                            |           |
| 4                                              | 2.01 | How similar are the climatic conditions of the Risk Assessment (RA) area and the taxon's native range?                                                                  | High                                                | Very high, within same country and basin.                                                                                                                                                                                                                                                                                                                                                                                                                                                                                                                                                                                                                                                                                                                                                                                                                                                                  | Very high |
| 5                                              | 2.02 | What is the quality of the climate matching data?                                                                                                                       | #N/A                                                | No climate analysis, within the same country and basin.                                                                                                                                                                                                                                                                                                                                                                                                                                                                                                                                                                                                                                                                                                                                                                                                                                                    | Very high |
| 6                                              | 2.03 | Is the taxon already present outside of captivity in the RA area?                                                                                                       | Yes                                                 | Fishbase                                                                                                                                                                                                                                                                                                                                                                                                                                                                                                                                                                                                                                                                                                                                                                                                                                                                                                   | Very high |
| 7                                              | 2.04 | How many potential vectors could the taxon use to enter in the RA area?                                                                                                 | One                                                 | Introduction for angling (Holcik, J., 1984 Review on experiments with introduction and acclimatization of the huchen -Hucho hucho (Linnaeus, 1758) (Salmonidae). EIFAC Tech.Pap., (42)                                                                                                                                                                                                                                                                                                                                                                                                                                                                                                                                                                                                                                                                                                                     | Medium    |
| 8                                              | 2.05 | Is the taxon currently found in close proximity to, and likely to enter into, the RA area in the near future (e.g. unintentional and intentional introductions)?        | Yes                                                 | Present in all countries, translocation is possible (Holcik, J., 1984 Review on experiments with introduction and acclimatization of the huchen -Hucho hucho (Linnaeus, 1758) (Salmonidae). EIFAC Tech.Pap., (42) Vol.2:289–98).                                                                                                                                                                                                                                                                                                                                                                                                                                                                                                                                                                                                                                                                           | Very high |
| 3. Invasive elsewhere                          |      |                                                                                                                                                                         |                                                     |                                                                                                                                                                                                                                                                                                                                                                                                                                                                                                                                                                                                                                                                                                                                                                                                                                                                                                            |           |
| 9                                              | 3.01 | Has the taxon become naturalised (established viable populations) outside its native range?                                                                             | Yes                                                 | Holcik, J., 1984 Review on experiments with introduction and acclimatization of the huchen -Hucho hucho (Linnaeus, 1758) (Salmonidae). EIFAC Tech.Pap., (42) Vol.2:289–98; Witkowski, Andrzej, Goryczko, Krzysztof and Kowalewski, Mieczysław. "The history of huchen, Hucho hucho (L.), in Poland – distribution, restoration and conservation" Fisheries & Aquatic Life, vol.21, no.3. 2013. pp.161-168. <a href="https://doi.org/10.2478/aopf-2013-0013">https://doi.org/10.2478/aopf-2013-0013</a>                                                                                                                                                                                                                                                                                                                                                                                                     | Very high |
| 10                                             | 3.02 | In the taxon's introduced range, are there known adverse impacts to wild stocks or commercial taxa?                                                                     | Yes                                                 | Holcik, J., 1984 Review on experiments with introduction and acclimatization of the huchen -Hucho hucho (Linnaeus, 1758) (Salmonidae). EIFAC Tech.Pap., (42) Vol.2:289–98                                                                                                                                                                                                                                                                                                                                                                                                                                                                                                                                                                                                                                                                                                                                  | High      |
| 11                                             | 3.03 | In the taxon's introduced range, are there known adverse impacts to aquaculture?                                                                                        | No                                                  | No such reports.                                                                                                                                                                                                                                                                                                                                                                                                                                                                                                                                                                                                                                                                                                                                                                                                                                                                                           | Medium    |
| 12                                             | 3.04 | In the taxon's introduced range, are there known adverse impacts to ecosystem services?                                                                                 | Yes                                                 | There has been a documented negative impact associated with one of those populations, the decline of other large sport fish ( <a href="https://www.fws.gov/fisheries/ANS/erss/highrisk/ERSS-Hucho-hucho_Final.pdf">https://www.fws.gov/fisheries/ANS/erss/highrisk/ERSS-Hucho-hucho_Final.pdf</a> ).                                                                                                                                                                                                                                                                                                                                                                                                                                                                                                                                                                                                       | High      |
| 13                                             | 3.05 | In the taxon's introduced range, are there known adverse socio-economic impacts?                                                                                        | No                                                  | Not listed in literature.                                                                                                                                                                                                                                                                                                                                                                                                                                                                                                                                                                                                                                                                                                                                                                                                                                                                                  | Medium    |
| B. Biology/Ecology                             |      |                                                                                                                                                                         |                                                     |                                                                                                                                                                                                                                                                                                                                                                                                                                                                                                                                                                                                                                                                                                                                                                                                                                                                                                            |           |
| 4. Undesirable (or persistence) traits         |      |                                                                                                                                                                         |                                                     |                                                                                                                                                                                                                                                                                                                                                                                                                                                                                                                                                                                                                                                                                                                                                                                                                                                                                                            |           |
| 14                                             | 4.01 | Is it likely that the taxon will be poisonous or pose other risks to human health?                                                                                      | No                                                  | Harmless (Luna, Susan M. in Froese, R. and D. Pauly. Editors. 2021.FishBase. World Wide Web electronic publication. <a href="http://www.fishbase.org">www.fishbase.org</a> , ( 02/2021 )).                                                                                                                                                                                                                                                                                                                                                                                                                                                                                                                                                                                                                                                                                                                 | Very high |
| 15                                             | 4.02 | Is it likely that the taxon will smother one or more native taxa (that are not threatened or protected)?                                                                | Yes                                                 | Brown trout, grayling, nase (Holcik, J., 1984 Review on experiments with introduction and acclimatization of the huchen -Hucho hucho (Linnaeus, 1758) (Salmonidae). EIFAC Tech.Pap.,                                                                                                                                                                                                                                                                                                                                                                                                                                                                                                                                                                                                                                                                                                                       | Medium    |
| 16                                             | 4.03 | Are there any threatened or protected taxa that the non-native taxon would parasitise in the RA area?                                                                   | No                                                  | No parasitic behaviour.                                                                                                                                                                                                                                                                                                                                                                                                                                                                                                                                                                                                                                                                                                                                                                                                                                                                                    | Very high |
| 17                                             | 4.04 | Is the taxon adaptable in terms of climatic and other environmental conditions, thus enhancing its potential persistence if it has invaded or could invade the RA area? | No                                                  | Very sensitive species: "The huchen may be transplanted into streams of the foot-hill zone with stony-gravel or gravel-sandy bottom, where the water temperature in summer months is not higher than 20°C, the dissolved oxygen does not fall below 8–9 mg/l, and the water is not polluted either by industrial, urban or agricultural waste. Those parts of a river where riffles alternate with bigger and deeper pools, where the flow is branched by islands, the banks are overgrown with shrubs and trees and interrupted by the mouths of tributaries are to be preferred. Reaches selected should be sufficiently long and the zone of the of foothill brooks with possible spawning grounds should be accessible. The overall length of a reach should be about 20 km" (Holcik, J., 1984 Review on experiments with introduction and acclimatization of the huchen -Hucho hucho (Linnaeus, 1758) | Very high |
| 18                                             | 4.05 | Is the taxon likely to disrupt food-web structure/function in aquatic ecosystems if it has invaded or is likely to invade the RA                                        | No                                                  | Not documented.                                                                                                                                                                                                                                                                                                                                                                                                                                                                                                                                                                                                                                                                                                                                                                                                                                                                                            | Medium    |

|                                 |      |                                                                                                                                                                 |                |                                                                                                                                                                                                                                                                                                                                                                                                                                                                                                                                                                                                                                                                                                                                                                                                                                                                                                       |           |
|---------------------------------|------|-----------------------------------------------------------------------------------------------------------------------------------------------------------------|----------------|-------------------------------------------------------------------------------------------------------------------------------------------------------------------------------------------------------------------------------------------------------------------------------------------------------------------------------------------------------------------------------------------------------------------------------------------------------------------------------------------------------------------------------------------------------------------------------------------------------------------------------------------------------------------------------------------------------------------------------------------------------------------------------------------------------------------------------------------------------------------------------------------------------|-----------|
| 19                              | 4.06 | Is the taxon likely to exert adverse impacts on ecosystem services in the RA area?                                                                              | No             | Could impact the native fish species if established, but usually fail to establish natural populations where introduced (Holcik, J., 1984 Review on experiments with introduction and acclimatization of the huchen -Hucho hucho (Linnaeus, 1758) (Salmonidae). EIFAC Tech.Pap., (42) Vol.2:289-98).                                                                                                                                                                                                                                                                                                                                                                                                                                                                                                                                                                                                  | Low       |
| 20                              | 4.07 | Is it likely that the taxon will host, and/or act as a vector for, recognised pests and infectious agents that are endemic in the RA                            | Yes            | Susceptible to parasites and diseases ( <a href="https://www.fws.gov/fisheries/ANS/erss/highrisk/ERSS-Hucho-hucho_Final.pdf">https://www.fws.gov/fisheries/ANS/erss/highrisk/ERSS-Hucho-hucho_Final.pdf</a> ).                                                                                                                                                                                                                                                                                                                                                                                                                                                                                                                                                                                                                                                                                        | High      |
| 21                              | 4.08 | Is it likely that the taxon will host, and/or act as a vector for, recognised pests and infectious agents that are absent from (novel to) the RA area?          | Yes            | Susceptible to parasites and diseases ( <a href="https://www.fws.gov/fisheries/ANS/erss/highrisk/ERSS-Hucho-hucho_Final.pdf">https://www.fws.gov/fisheries/ANS/erss/highrisk/ERSS-Hucho-hucho_Final.pdf</a> ).                                                                                                                                                                                                                                                                                                                                                                                                                                                                                                                                                                                                                                                                                        | High      |
| 22                              | 4.09 | Is it likely that the taxon will achieve a body size that will make it more likely to be released from captivity?                                               | Yes            | Max 150 cm and 52 kg (Luna, Susan M. in Froese, R. and D. Pauly. Editors. 2021.FishBase. World Wide Web electronic publication. <a href="http://www.fishbase.org">www.fishbase.org</a> , ( 02/2021 )).                                                                                                                                                                                                                                                                                                                                                                                                                                                                                                                                                                                                                                                                                                | Very high |
| 23                              | 4.10 | Is the taxon capable of sustaining itself in a range of water velocity conditions (e.g. versatile in habitat use)?                                              | No             | The huchen may be transplanted into streams of the foot-hill zone with stony-gravel or gravel-sandy bottom, where the water temperature in summer months is not higher than 20°C, the dissolved oxygen does not fall below 8-9 mg/l, and the water is not polluted either by industrial, urban or agricultural waste. Those parts of a river where riffles alternate with bigger and deeper pools, where the flow is branched by islands, the banks are overgrown with shrubs and trees and interrupted by the mouths of tributaries are to be preferred. Reaches selected should be sufficiently long and the zone of the of foothill brooks with possible spawning grounds should be accessible. The overall length of a reach should be about 20 km" (Holcik, J., 1984 Review on experiments with introduction and acclimatization of the huchen -Hucho hucho (Linnaeus, 1758) (Salmonidae). EIFAC | Very high |
| 24                              | 4.11 | Is it likely that the taxon's mode of existence (e.g. excretion of by-products) or behaviours (e.g. feeding) will reduce habitat quality for native taxa?       | No             | Not documented.                                                                                                                                                                                                                                                                                                                                                                                                                                                                                                                                                                                                                                                                                                                                                                                                                                                                                       | High      |
| 25                              | 4.12 | Is the taxon likely to maintain a viable population even when present in low densities (or persisting in adverse conditions by way of a dormant form)?          | No             | Not documented.                                                                                                                                                                                                                                                                                                                                                                                                                                                                                                                                                                                                                                                                                                                                                                                                                                                                                       | Low       |
| <b>5. Resource exploitation</b> |      |                                                                                                                                                                 |                |                                                                                                                                                                                                                                                                                                                                                                                                                                                                                                                                                                                                                                                                                                                                                                                                                                                                                                       |           |
| 26                              | 5.01 | Is the taxon likely to consume threatened or protected native taxa in the RA area?                                                                              | Yes            | Carnivore. Juveniles feed mainly on invertebrates and adults mostly on fishes, but also prey on amphibians, reptiles, small mammals and waterfowl (Luna, Susan M. in Froese, R. and D. Pauly. Editors. 2021.FishBase. World Wide Web electronic publication. <a href="http://www.fishbase.org">www.fishbase.org</a> , ( 02/2021 )).                                                                                                                                                                                                                                                                                                                                                                                                                                                                                                                                                                   | Very high |
| 27                              | 5.02 | Is the taxon likely to sequester food resources (including nutrients) to the detriment of native taxa in the RA area?                                           | Not applicable | No data.                                                                                                                                                                                                                                                                                                                                                                                                                                                                                                                                                                                                                                                                                                                                                                                                                                                                                              | Very high |
| <b>6. Reproduction</b>          |      |                                                                                                                                                                 |                |                                                                                                                                                                                                                                                                                                                                                                                                                                                                                                                                                                                                                                                                                                                                                                                                                                                                                                       |           |
| 28                              | 6.01 | Is the taxon likely to exhibit parental care and/or to reduce age-at-maturity in response to environmental conditions?                                          | Yes            | Both sexes covered the eggs with substrate. They both defend the spawning site up to 2 weeks after spawning (Luna, Susan M. in Froese, R. and D. Pauly. Editors. 2021.FishBase. World Wide Web electronic publication. <a href="http://www.fishbase.org">www.fishbase.org</a> , ( 02/2021 )).                                                                                                                                                                                                                                                                                                                                                                                                                                                                                                                                                                                                         | Very high |
| 29                              | 6.02 | Is the taxon likely to produce viable gametes or propagules (in the RA area)?                                                                                   | Yes            | Attempts to introduce the huchen inside the original area of its distribution (transplantation), as in RA area, were more successful (Holcik, J., 1984 Review on experiments with introduction and acclimatization of the huchen -Hucho hucho (Linnaeus, 1758) (Salmonidae). EIFAC Tech.Pap., (42) Vol.2:289-98), taking that succesful introduction is possibility to spawn in the wild.                                                                                                                                                                                                                                                                                                                                                                                                                                                                                                             | Medium    |
| 30                              | 6.03 | Is the taxon likely to hybridise naturally with native taxa?                                                                                                    | No             | No suitable native species to hybridize with.                                                                                                                                                                                                                                                                                                                                                                                                                                                                                                                                                                                                                                                                                                                                                                                                                                                         | Very high |
| 31                              | 6.04 | Is the taxon likely to be hermaphroditic or to display asexual reproduction?                                                                                    | No             | No such behavior or adaptations.                                                                                                                                                                                                                                                                                                                                                                                                                                                                                                                                                                                                                                                                                                                                                                                                                                                                      | Very high |
| 32                              | 6.05 | Is the taxon dependent on the presence of another taxon (or specific habitat features) to complete its life cycle?                                              | Yes            | Small and shallow streams in upper reaches of tributaries, on gravelly bottom (Luna, Susan M. in Froese, R. and D. Pauly. Editors. 2021.FishBase. World Wide Web electronic publication. <a href="http://www.fishbase.org">www.fishbase.org</a> , ( 02/2021 )).                                                                                                                                                                                                                                                                                                                                                                                                                                                                                                                                                                                                                                       | Very high |
| 33                              | 6.06 | Is the taxon known (or likely) to produce a large number of propagules or offspring within a short time span (e.g. < 1 year)?                                   | Yes            | 1600-27000 eggs per female (Luna, Susan M. in Froese, R. and D. Pauly. Editors. 2021.FishBase. World Wide Web electronic publication. <a href="http://www.fishbase.org">www.fishbase.org</a> , ( 02/2021 )).                                                                                                                                                                                                                                                                                                                                                                                                                                                                                                                                                                                                                                                                                          | Medium    |
| 34                              | 6.07 | How many time units (days, months, years) does the taxon require to reach the age-at-first-reproduction?                                                        | 3              | Luna, Susan M. in Froese, R. and D. Pauly. Editors. 2021.FishBase. World Wide Web electronic publication. <a href="http://www.fishbase.org">www.fishbase.org</a> , ( 02/2021 )                                                                                                                                                                                                                                                                                                                                                                                                                                                                                                                                                                                                                                                                                                                        | Medium    |
| <b>7. Dispersal mechanisms</b>  |      |                                                                                                                                                                 |                |                                                                                                                                                                                                                                                                                                                                                                                                                                                                                                                                                                                                                                                                                                                                                                                                                                                                                                       |           |
| 35                              | 7.01 | How many potential internal vectors/pathways could the taxon use to disperse within the RA area (with suitable                                                  | >1             | Introductions for angling, self-dispersal in connected rivers (personal opinion).                                                                                                                                                                                                                                                                                                                                                                                                                                                                                                                                                                                                                                                                                                                                                                                                                     | Low       |
| 36                              | 7.02 | Will any of these vectors/pathways bring the taxon in close proximity to one or more protected areas (e.g. MCZ, MPA, SSSI)?                                     | Yes            | Possibly, if stocked river is in a vicinity of the protected area and connected to other bodies of water within it (personal opinion).                                                                                                                                                                                                                                                                                                                                                                                                                                                                                                                                                                                                                                                                                                                                                                | Low       |
| 37                              | 7.03 | Does the taxon have a means of actively attaching itself to hard substrata (e.g. ship hulls, pilings, buoys) such that it enhances the likelihood of dispersal? | No             | No such adaptations.                                                                                                                                                                                                                                                                                                                                                                                                                                                                                                                                                                                                                                                                                                                                                                                                                                                                                  | Very high |
| 38                              | 7.04 | Is natural dispersal of the taxon likely to occur as eggs (for animals) or as propagules (for plants: seeds, spores) in the RA area?                            | No             | Eggs are covered with gravel (Luna, Susan M. in Froese, R. and D. Pauly. Editors. 2021.FishBase. World Wide Web electronic publication. <a href="http://www.fishbase.org">www.fishbase.org</a> , ( 02/2021 )).                                                                                                                                                                                                                                                                                                                                                                                                                                                                                                                                                                                                                                                                                        | High      |
| 39                              | 7.05 | Is natural dispersal of the taxon likely to occur as larvae/juveniles (for animals) or as fragments/seedlings (for plants) in the RA area?                      | Yes            | Huchen in France penetrated from Rhone tributary Ussets to the main river (Holcik, J., 1984 Review on experiments with introduction and acclimatization of the huchen -Hucho hucho (Linnaeus, 1758) (Salmonidae). EIFAC Tech.Pap., (42)                                                                                                                                                                                                                                                                                                                                                                                                                                                                                                                                                                                                                                                               | High      |

|                                |      |                                                                                                                                                                              |                |                                                                                                                                                                                                                                                                                                                                                                   |           |
|--------------------------------|------|------------------------------------------------------------------------------------------------------------------------------------------------------------------------------|----------------|-------------------------------------------------------------------------------------------------------------------------------------------------------------------------------------------------------------------------------------------------------------------------------------------------------------------------------------------------------------------|-----------|
| 40                             | 7.06 | Are older life stages of the taxon likely to migrate in the RA area for reproduction?                                                                                        | Yes            | Ptoamodromous, spawning migrations (Luna, Susan M. in Froese, R. and D. Pauly. Editors. 2021.FishBase. World Wide Web electronic publication. <a href="http://www.fishbase.org">www.fishbase.org</a> , ( 02/2021 )).                                                                                                                                              | Very high |
| 41                             | 7.07 | Are propagules or eggs of the taxon likely to be dispersed in the RA area by other animals?                                                                                  | No             | Parental care of the spawning site (Luna, Susan M. in Froese, R. and D. Pauly. Editors. 2021.FishBase. World Wide Web electronic publication. <a href="http://www.fishbase.org">www.fishbase.org</a> , ( 02/2021 )).                                                                                                                                              | High      |
| 42                             | 7.08 | Is dispersal of the taxon along any of the vectors/pathways mentioned in the previous seven questions (35–41; i.e. both unintentional or intentional) likely to be           | Yes            | Drift, migrations, introductions.                                                                                                                                                                                                                                                                                                                                 | High      |
| 43                             | 7.09 | Is dispersal of the taxon density dependent?                                                                                                                                 | No             | No documented evidence.                                                                                                                                                                                                                                                                                                                                           | Low       |
| <b>8. Tolerance attributes</b> |      |                                                                                                                                                                              |                |                                                                                                                                                                                                                                                                                                                                                                   |           |
| 44                             | 8.01 | Is the taxon able to withstand being out of water for extended periods (e.g. minimum of one or more hours) at some stage of its life cycle?                                  | No             | Very sensitive species (personal communication).                                                                                                                                                                                                                                                                                                                  | Very high |
| 45                             | 8.02 | Is the taxon tolerant of a wide range of water quality conditions relevant to that taxon? [In the Justification field, indicate the relevant water quality variable(s) being | No             | Very sensitive to pollution and water quality (Holcik, J., 1984 Review on experiments with introduction and acclimatization of the huchen -Hucho hucho (Linnaeus, 1758) (Salmonidae). EIFAC Tech.Pap., (42) Vol.2:289–98).                                                                                                                                        | Very high |
| 46                             | 8.03 | Can the taxon be controlled or eradicated in the wild with chemical, biological, or other agents/means?                                                                      | Not applicable | Not allowed.                                                                                                                                                                                                                                                                                                                                                      | Very high |
| 47                             | 8.04 | Is the taxon likely to tolerate or benefit from environmental/human disturbance?                                                                                             | No             | In spite of its great areas of distribution the huchen is now considered to be an endangered species because of the effects on stocks of increasing stream regulation and pollution (Holcik, J., 1984 Review on experiments with introduction and acclimatization of the huchen -Hucho hucho (Linnaeus, 1758) (Salmonidae). EIFAC Tech.Pap., (42) Vol.2:289–98)). | Very high |
| 48                             | 8.05 | Is the taxon able to tolerate salinity levels that are higher or lower than those found in its usual environment?                                                            | No             | Exclusively freshwater species.                                                                                                                                                                                                                                                                                                                                   | Very high |
| 49                             | 8.06 | Are there effective natural enemies (predators) of the taxon present in the RA                                                                                               | Yes            | Piscivorous birds and mammals prey on smaller specimens (personal opinion).                                                                                                                                                                                                                                                                                       | Medium    |
| <b>C. Climate change</b>       |      |                                                                                                                                                                              |                |                                                                                                                                                                                                                                                                                                                                                                   |           |
| <b>9. Climate change</b>       |      |                                                                                                                                                                              |                |                                                                                                                                                                                                                                                                                                                                                                   |           |
| 50                             | 9.01 | Under the predicted future climatic conditions, are the risks of entry into the RA area posed by the taxon likely to increase, decrease or not change?                       | No change      | Translocation mediated by humans, no natural dispersion from current locations.                                                                                                                                                                                                                                                                                   | Medium    |
| 51                             | 9.02 | Under the predicted future climatic conditions, are the risks of establishment posed by the taxon likely to increase, decrease or not change?                                | Decrease       | Future conditions will impact flow regimes and temperatures wich have great influence on populations (Holcik, J., 1984 Review on experiments with introduction and acclimatization of the huchen - Hucho hucho (Linnaeus, 1758) (Salmonidae). EIFAC Tech.Pap., (42) Vol.2:289–98).                                                                                | Medium    |
| 52                             | 9.03 | Under the predicted future climatic conditions, are the risks of dispersal within the RA area posed by the taxon likely to increase, decrease or not change?                 | Decrease       | Future conditions will impact flow regimes and temperatures, reducing the number of suitable habitats (personal opinion).                                                                                                                                                                                                                                         | Medium    |
| 53                             | 9.04 | Under the predicted future climatic conditions, what is the likely magnitude of future potential impacts on biodiversity and/or ecological integrity/status?                 | Lower          | Future conditions will impact flow regimes and temperatures wich have great influence on populations (Holcik, J., 1984 Review on experiments with introduction and acclimatization of the huchen - Hucho hucho (Linnaeus, 1758) (Salmonidae). EIFAC Tech.Pap., (42) Vol.2:289–98), potentially reducing the impact of the species.                                | Medium    |
| 54                             | 9.05 | Under the predicted future climatic conditions, what is the likely magnitude of future potential impacts on ecosystem structure and/or function?                             | Lower          | Future conditions will impact flow regimes and temperatures wich have great influence on populations (Holcik, J., 1984 Review on experiments with introduction and acclimatization of the huchen - Hucho hucho (Linnaeus, 1758) (Salmonidae). EIFAC Tech.Pap., (42) Vol.2:289–98), potentially reducing the impact of the species.                                | Medium    |
| 55                             | 9.06 | Under the predicted future climatic conditions, what is the likely magnitude of future potential impacts on ecosystem services/socio-economic factors?                       | Lower          | Future conditions will impact flow regimes and temperatures wich have great influence on populations (Holcik, J., 1984 Review on experiments with introduction and acclimatization of the huchen - Hucho hucho (Linnaeus, 1758) (Salmonidae). EIFAC Tech.Pap., (42) Vol.2:289–98), potentially reducing the impact of the species.                                | Medium    |

| Statistics                                     |              |
|------------------------------------------------|--------------|
| Scores                                         |              |
| <b>BRA</b>                                     | <b>9.0</b>   |
| <b>BRA Outcome</b>                             | <b>-</b>     |
| <b>BRA+CCA</b>                                 | <b>-1.0</b>  |
| <b>BRA+CCA Outcome</b>                         | <b>-</b>     |
| Score partition                                |              |
| <b>A. Biogeography/Historical</b>              | <b>3.0</b>   |
| 1. Domestication/Cultivation                   | 2.0          |
| 2. Climate, distribution and introduction risk | 1.0          |
| 3. Invasive elsewhere                          | 0.0          |
| <b>B. Biology/Ecology</b>                      | <b>6.0</b>   |
| 4. Undesirable (or persistence) traits         | 3.0          |
| 5. Resource exploitation                       | 5.0          |
| 6. Reproduction                                | 0.0          |
| 7. Dispersal mechanisms                        | 2.0          |
| 8. Tolerance attributes                        | -4.0         |
| <b>C. Climate change</b>                       | <b>-10.0</b> |
| 9. Climate change                              | -10.0        |
| Answered Questions                             |              |
| <b>Total</b>                                   | <b>55</b>    |
| <b>A. Biogeography/Historical</b>              | <b>13</b>    |
| 1. Domestication/Cultivation                   | 3            |
| 2. Climate, distribution and introduction risk | 5            |
| 3. Invasive elsewhere                          | 5            |
| <b>B. Biology/Ecology</b>                      | <b>36</b>    |

|                                              |           |
|----------------------------------------------|-----------|
| 4. Undesirable (or persistence) traits       | 12        |
| 5. Resource exploitation                     | 2         |
| 6. Reproduction                              | 7         |
| 7. Dispersal mechanisms                      | 9         |
| 8. Tolerance attributes                      | 6         |
| <b>C. Climate change</b>                     | <b>6</b>  |
| 9. Climate change                            | 6         |
| <b>Sectors affected</b>                      |           |
| Commercial                                   | 4         |
| Environmental                                | 2         |
| <b>Species or population nuisance traits</b> | <b>-3</b> |

|                   |  |      |
|-------------------|--|------|
| <b>Thresholds</b> |  |      |
| BRA               |  | -    |
| BRA+CCA           |  | -    |
| <b>Confidence</b> |  |      |
| BRA+CCA           |  | 0.75 |
| BRA               |  | 0.79 |
| CCA               |  | 0.50 |

|                      |  |
|----------------------|--|
| <b>Date and Time</b> |  |
| 18/05/2021 09:35:00  |  |

## AS-ISK v2

| Taxon and Assessor details         |                                         |
|------------------------------------|-----------------------------------------|
| Category                           | Fishes and Lampreys (freshwater)        |
| Taxon name                         | <i>Hucho hucho</i>                      |
| Common name                        | huchen                                  |
| Assessor                           | Tamara Kanjuh                           |
| Risk screening context             |                                         |
| Reason and socio-economic benefits |                                         |
| Risk assessment area               | Danube & Adriatic basins BA, HR, ME, RS |
| Taxonomy                           |                                         |
| Native range                       |                                         |
| Introduced range                   |                                         |
| URL                                |                                         |

|                                                |      |                                                                                                                                                                         | Response | Justification (references and/or other information)                                                                                                                                                                                                           | Confidence |
|------------------------------------------------|------|-------------------------------------------------------------------------------------------------------------------------------------------------------------------------|----------|---------------------------------------------------------------------------------------------------------------------------------------------------------------------------------------------------------------------------------------------------------------|------------|
| A. Biogeography / Historical                   |      |                                                                                                                                                                         |          |                                                                                                                                                                                                                                                               |            |
| 1. Domestication/Cultivation                   |      |                                                                                                                                                                         |          |                                                                                                                                                                                                                                                               |            |
| 1                                              | 1.01 | Has the taxon been the subject of domestication (or cultivation) for at least 20 generations?                                                                           | Yes      | Currently, Danube salmon populations are fragmented within the Danube drainage, with many being supported by artificial reproduction and stocking programs (Ihut et al., 2014).                                                                               | High       |
| 2                                              | 1.02 | Is the taxon harvested in the wild and likely to be sold or used in its live form?                                                                                      | Yes      | Fisheries: commercial; aquaculture: commercial; gamefish: yes (fishbase.de)                                                                                                                                                                                   | High       |
| 3                                              | 1.03 | Does the taxon have invasive races, varieties, sub-taxa or congeners?                                                                                                   | No       | No information found.                                                                                                                                                                                                                                         | Low        |
| 2. Climate, distribution and introduction risk |      |                                                                                                                                                                         |          |                                                                                                                                                                                                                                                               |            |
| 4                                              | 2.01 | How similar are the climatic conditions of the Risk Assessment (RA) area and the taxon's native range?                                                                  | High     | Dfa, Dfb (Köppen-Geiger climate classification system)                                                                                                                                                                                                        | High       |
| 5                                              | 2.02 | What is the quality of the climate matching data?                                                                                                                       | High     | Köppen-Geiger climate classification system                                                                                                                                                                                                                   | High       |
| 6                                              | 2.03 | Is the taxon already present outside of captivity in the RA area?                                                                                                       | Yes      | Currently, Danube salmon populations are fragmented within the Danube drainage, with many being supported by artificial reproduction and stocking programs (Ihut et al., 2014).                                                                               | Medium     |
| 7                                              | 2.04 | How many potential vectors could the taxon use to enter in the RA area?                                                                                                 | >1       | Aquaculture, sportfishing, angling.                                                                                                                                                                                                                           | Medium     |
| 8                                              | 2.05 | Is the taxon currently found in close proximity to, and likely to enter into, the RA area in the near future (e.g. unintentional and intentional introductions)?        | Yes      | In Serbia the main river inhabited by huchen is the Drina and its tributaries. This river is 346 km long with an average discharge of 395 m <sup>3</sup> s <sup>-1</sup> , 220 km of which flow through Serbia (Mijović-Magdić, 2007).                        | High       |
| 3. Invasive elsewhere                          |      |                                                                                                                                                                         |          |                                                                                                                                                                                                                                                               |            |
| 9                                              | 3.01 | Has the taxon become naturalised (established viable populations) outside its native range?                                                                             | Yes      | In one stretch of the Hornád River, Czechoslovakia, a transplanted and naturalized population of huchen had to be eradicated because the abundance of the brown trout and the grayling ( <i>Thymallus thymallus</i> ) significantly decreased (Skácel, 1976). | Low        |
| 10                                             | 3.02 | In the taxon's introduced range, are there known adverse impacts to wild stocks or commercial taxa?                                                                     | No       | In one stretch of the Hornád River, Czechoslovakia, a transplanted and naturalized population of huchen had to be eradicated because the abundance of the brown trout and the grayling ( <i>Thymallus thymallus</i> ) significantly decreased (Skácel, 1976). | Low        |
| 11                                             | 3.03 | In the taxon's introduced range, are there known adverse impacts to aquaculture?                                                                                        | No       | No information found.                                                                                                                                                                                                                                         | Low        |
| 12                                             | 3.04 | In the taxon's introduced range, are there known adverse impacts to ecosystem                                                                                           | No       | No information found.                                                                                                                                                                                                                                         | Low        |
| 13                                             | 3.05 | In the taxon's introduced range, are there known adverse socio-economic impacts?                                                                                        | No       | No information found.                                                                                                                                                                                                                                         | Low        |
| B. Biology / Ecology                           |      |                                                                                                                                                                         |          |                                                                                                                                                                                                                                                               |            |
| 4. Undesirable (or persistence) traits         |      |                                                                                                                                                                         |          |                                                                                                                                                                                                                                                               |            |
| 14                                             | 4.01 | Is it likely that the taxon will be poisonous or pose other risks to human health?                                                                                      | No       | Harmless (fishbase.de)                                                                                                                                                                                                                                        | High       |
| 15                                             | 4.02 | Is it likely that the taxon will smother one or more native taxa (that are not threatened or protected)?                                                                | No       | No information found.                                                                                                                                                                                                                                         | Low        |
| 16                                             | 4.03 | Are there any threatened or protected taxa that the non-native taxon would parasitise in the RA area?                                                                   | No       | No information found.                                                                                                                                                                                                                                         | Low        |
| 17                                             | 4.04 | Is the taxon adaptable in terms of climatic and other environmental conditions, thus enhancing its potential persistence if it has invaded or could invade the RA area? | No       | The taxon is very sensitive to environmental conditions.                                                                                                                                                                                                      | Low        |
| 18                                             | 4.05 | Is the taxon likely to disrupt food-web structure/function in aquatic ecosystems if it has invaded or is likely to invade the RA                                        | No       | No information found.                                                                                                                                                                                                                                         | Low        |
| 19                                             | 4.06 | Is the taxon likely to exert adverse impacts on ecosystem services in the RA area?                                                                                      | No       | No information found.                                                                                                                                                                                                                                         | Low        |
| 20                                             | 4.07 | Is it likely that the taxon will host, and/or act as a vector for, recognised pests and infectious agents that are endemic in the RA                                    | No       | No information found.                                                                                                                                                                                                                                         | Low        |
| 21                                             | 4.08 | Is it likely that the taxon will host, and/or act as a vector for, recognised pests and infectious agents that are absent from (novel to) the RA area?                  | No       | No information found.                                                                                                                                                                                                                                         | Low        |
| 22                                             | 4.09 | Is it likely that the taxon will achieve a body size that will make it more likely to be released from captivity?                                                       | No       | No information found.                                                                                                                                                                                                                                         | Low        |
| 23                                             | 4.10 | Is the taxon capable of sustaining itself in a range of water velocity conditions (e.g. versatile in habitat use)?                                                      | Yes      | Over 3.5 m/s (Bănađduc, 2008).                                                                                                                                                                                                                                | High       |
| 24                                             | 4.11 | Is it likely that the taxon's mode of existence (e.g. excretion of by-products) or behaviours (e.g. feeding) will reduce habitat quality for native taxa?               | No       | No information found.                                                                                                                                                                                                                                         | Low        |

|                                 |      |                                                                                                                                                                              |           |                                                                                                                                                                                                                                                                                                                                  |        |
|---------------------------------|------|------------------------------------------------------------------------------------------------------------------------------------------------------------------------------|-----------|----------------------------------------------------------------------------------------------------------------------------------------------------------------------------------------------------------------------------------------------------------------------------------------------------------------------------------|--------|
| 25                              | 4.12 | Is the taxon likely to maintain a viable population even when present in low densities (or persisting in adverse conditions by way of a dormant form)?                       | No        | No information found.                                                                                                                                                                                                                                                                                                            | Low    |
| <b>5. Resource exploitation</b> |      |                                                                                                                                                                              |           |                                                                                                                                                                                                                                                                                                                                  |        |
| 26                              | 5.01 | Is the taxon likely to consume threatened or protected native taxa in the RA area?                                                                                           | No        | No information found.                                                                                                                                                                                                                                                                                                            | Low    |
| 27                              | 5.02 | Is the taxon likely to sequester food resources (including nutrients) to the detriment of native taxa in the RA area?                                                        | Yes       | Danube huchen grows faster than the other species of salmonids early in its life cycle due to the early beginning of predatory feeding (Bastl and Kirka, 1958).                                                                                                                                                                  | Medium |
| <b>6. Reproduction</b>          |      |                                                                                                                                                                              |           |                                                                                                                                                                                                                                                                                                                                  |        |
| 28                              | 6.01 | Is the taxon likely to exhibit parental care and/or to reduce age-at-maturity in response to environmental conditions?                                                       | No        | No parental care (fishbase.de)                                                                                                                                                                                                                                                                                                   | Medium |
| 29                              | 6.02 | Is the taxon likely to produce viable gametes or propagules (in the RA area)?                                                                                                | Yes       | The species were translocated in the Danube Basin into other rivers of the same basin.                                                                                                                                                                                                                                           | Medium |
| 30                              | 6.03 | Is the taxon likely to hybridise naturally with native taxa?                                                                                                                 | No        | No information found.                                                                                                                                                                                                                                                                                                            | Low    |
| 31                              | 6.04 | Is the taxon likely to be hermaphroditic or to display asexual reproduction?                                                                                                 | No        | No information found.                                                                                                                                                                                                                                                                                                            | Low    |
| 32                              | 6.05 | Is the taxon dependent on the presence of another taxon (or specific habitat features) to complete its life cycle?                                                           | No        | No information found.                                                                                                                                                                                                                                                                                                            | Low    |
| 33                              | 6.06 | Is the taxon known (or likely) to produce a large number of propagules or offspring within a short time span (e.g. < 1 year)?                                                | Yes       | The number of eggs deposited depends on body (Ihuta et al., 2014).                                                                                                                                                                                                                                                               | Low    |
| 34                              | 6.07 | How many time units (days, months, years) does the taxon require to reach the age-at-first-reproduction?                                                                     | 3         | According to Ivaska. (1951) the females reach sexual maturity at the age of 5 years; other authors give 3 or 4 years.                                                                                                                                                                                                            | High   |
| <b>7. Dispersal mechanisms</b>  |      |                                                                                                                                                                              |           |                                                                                                                                                                                                                                                                                                                                  |        |
| 35                              | 7.01 | How many potential internal vectors/pathways could the taxon use to disperse within the RA area (with suitable vectors/pathways)?                                            | One       | Intentional restocking.                                                                                                                                                                                                                                                                                                          | Medium |
| 36                              | 7.02 | Will any of these vectors/pathways bring the taxon in close proximity to one or more protected areas (e.g. MCZ, MPA, SSSI)?                                                  | No        | No information found.                                                                                                                                                                                                                                                                                                            | Low    |
| 37                              | 7.03 | Does the taxon have a means of actively attaching itself to hard substrata (e.g. ship hulls, pilings, buoys) such that it enhances the likelihood of dispersal?              | No        | No information found.                                                                                                                                                                                                                                                                                                            | Low    |
| 38                              | 7.04 | Is natural dispersal of the taxon likely to occur as eggs (for animals) or as propagules (for plants: seeds, spores) in the RA area?                                         | No        | The dispersion of the taxon occurs as juvenil.                                                                                                                                                                                                                                                                                   | Low    |
| 39                              | 7.05 | Is natural dispersal of the taxon likely to occur as larvae/juveniles (for animals) or as fragments/seedlings (for plants) in the RA area?                                   | Yes       | The dispersion of the taxon occurs as juvenil.                                                                                                                                                                                                                                                                                   | Low    |
| 40                              | 7.06 | Are older life stages of the taxon likely to migrate in the RA area for reproduction?                                                                                        | Yes       | ...pawning migrations can be restricted to just a few hundred meters (Ihuta et al., 2014).                                                                                                                                                                                                                                       | Medium |
| 41                              | 7.07 | Are propagules or eggs of the taxon likely to be dispersed in the RA area by other animals?                                                                                  | No        | No information found.                                                                                                                                                                                                                                                                                                            | Low    |
| 42                              | 7.08 | Is dispersal of the taxon along any of the vectors/pathways mentioned in the previous seven questions (35–41; i.e. both unintentional or intentional) likely to be           | Yes       | Intentional restocking.                                                                                                                                                                                                                                                                                                          | Low    |
| 43                              | 7.09 | Is dispersal of the taxon density dependent?                                                                                                                                 | No        | No information found.                                                                                                                                                                                                                                                                                                            | Low    |
| <b>8. Tolerance attributes</b>  |      |                                                                                                                                                                              |           |                                                                                                                                                                                                                                                                                                                                  |        |
| 44                              | 8.01 | Is the taxon able to withstand being out of water for extended periods (e.g. minimum of one or more hours) at some stage of its life cycle?                                  | No        | The taxon cannot survive out of the water.                                                                                                                                                                                                                                                                                       | Low    |
| 45                              | 8.02 | Is the taxon tolerant of a wide range of water quality conditions relevant to that taxon? [In the Justification field, indicate the relevant water quality variable(s) being | No        | The taxon is very sensitive to environmental changes.                                                                                                                                                                                                                                                                            | Medium |
| 46                              | 8.03 | Can the taxon be controlled or eradicated in the wild with chemical, biological, or other agents/means?                                                                      | No        | No information found.                                                                                                                                                                                                                                                                                                            | Low    |
| 47                              | 8.04 | Is the taxon likely to tolerate or benefit from environmental/human disturbance?                                                                                             | No        | Excessive anthropogenic impacts like habitat destruction, irresponsible deforestation, pollution, poaching and dam construction, have led to significant reductions in population abundances (Cristea, 2007; Geist et al., 2009).                                                                                                | High   |
| 48                              | 8.05 | Is the taxon able to tolerate salinity levels that are higher or lower than those found in its usual environment?                                                            | No        | The taxon is very sensitive to environmental changes.                                                                                                                                                                                                                                                                            | Low    |
| 49                              | 8.06 | Are there effective natural enemies (predators) of the taxon present in the RA area?                                                                                         | No        | Mature H. hucho have no predators. Young and small individuals, when they arrive in waters which run relatively slowly, can become the prey of the pike (Esox lucius) (FAO, 1968).                                                                                                                                               | High   |
| <b>C. Climate change</b>        |      |                                                                                                                                                                              |           |                                                                                                                                                                                                                                                                                                                                  |        |
| <b>9. Climate change</b>        |      |                                                                                                                                                                              |           |                                                                                                                                                                                                                                                                                                                                  |        |
| 50                              | 9.01 | Under the predicted future climatic conditions, are the risks of entry into the RA area posed by the taxon likely to increase, decrease or not change?                       | No change | The effects of climate change have been much discussed but presently, especially for the Balkan region, there is a lack of reference data or reliable models to make any serious prediction on the potential effects of climate on the species in the region (Fryhof et al., 2015). The taxon is very sensitive to environmental | Medium |
| 51                              | 9.02 | Under the predicted future climatic conditions, are the risks of establishment posed by the taxon likely to increase, decrease or not change?                                | Decrease  | The taxon is very sensitive to environmental changes.                                                                                                                                                                                                                                                                            | Medium |

|    |      |                                                                                                                                                              |          |                                                       |        |
|----|------|--------------------------------------------------------------------------------------------------------------------------------------------------------------|----------|-------------------------------------------------------|--------|
| 52 | 9.03 | Under the predicted future climatic conditions, are the risks of dispersal within the RA area posed by the taxon likely to increase, decrease or not change? | Increase | The taxon is very sensitive to environmental changes. | Medium |
| 53 | 9.04 | Under the predicted future climatic conditions, what is the likely magnitude of future potential impacts on biodiversity and/or ecological integrity/status? | Lower    | The taxon is very sensitive to environmental changes. | Low    |
| 54 | 9.05 | Under the predicted future climatic conditions, what is the likely magnitude of future potential impacts on ecosystem structure and/or function?             | Lower    | The taxon is very sensitive to environmental changes. | Low    |
| 55 | 9.06 | Under the predicted future climatic conditions, what is the likely magnitude of future potential impacts on ecosystem services/socio-economic factors?       | Lower    | The taxon is very sensitive to environmental changes. | Low    |

| Statistics                                     |             |
|------------------------------------------------|-------------|
| Scores                                         |             |
| <b>BRA</b>                                     | <b>7.0</b>  |
| <b>BRA Outcome</b>                             | <b>-</b>    |
| <b>BRA+CCA</b>                                 | <b>1.0</b>  |
| <b>BRA+CCA Outcome</b>                         | <b>-</b>    |
| Score partition                                |             |
| <b>A. Biogeography/Historical</b>              | <b>6.0</b>  |
| 1. Domestication/Cultivation                   | 2.0         |
| 2. Climate, distribution and introduction risk | 2.0         |
| 3. Invasive elsewhere                          | 2.0         |
| <b>B. Biology/Ecology</b>                      | <b>1.0</b>  |
| 4. Undesirable (or persistence) traits         | 0.0         |
| 5. Resource exploitation                       | 2.0         |
| 6. Reproduction                                | 1.0         |
| 7. Dispersal mechanisms                        | 0.0         |
| 8. Tolerance attributes                        | -2.0        |
| <b>C. Climate change</b>                       | <b>-6.0</b> |
| 9. Climate change                              | -6.0        |
| Answered Questions                             |             |
| <b>Total</b>                                   | <b>55</b>   |
| <b>A. Biogeography/Historical</b>              | <b>13</b>   |
| 1. Domestication/Cultivation                   | 3           |
| 2. Climate, distribution and introduction risk | 5           |
| 3. Invasive elsewhere                          | 5           |
| <b>B. Biology/Ecology</b>                      | <b>36</b>   |
| 4. Undesirable (or persistence) traits         | 12          |
| 5. Resource exploitation                       | 2           |
| 6. Reproduction                                | 7           |
| 7. Dispersal mechanisms                        | 9           |
| 8. Tolerance attributes                        | 6           |
| <b>C. Climate change</b>                       | <b>6</b>    |
| 9. Climate change                              | 6           |
| Sectors affected                               |             |
| <b>Commercial</b>                              | <b>4</b>    |
| <b>Environmental</b>                           | <b>-4</b>   |
| <b>Species or population nuisance traits</b>   | <b>4</b>    |

| Thresholds     |             |
|----------------|-------------|
| <b>BRA</b>     | <b>-</b>    |
| <b>BRA+CCA</b> | <b>-</b>    |
| Confidence     |             |
| <b>BRA+CCA</b> | <b>0.39</b> |
| <b>BRA</b>     | <b>0.39</b> |
| <b>CCA</b>     | <b>0.38</b> |

| Date and Time       |  |
|---------------------|--|
| 30/05/2021 15:13:13 |  |

## AS-ISK v2

| Taxon and Assessor details         |                                         |
|------------------------------------|-----------------------------------------|
| Category                           | Fishes and Lampreys (freshwater)        |
| Taxon name                         | <i>Hucho hucho</i>                      |
| Common name                        | huchen                                  |
| Assessor                           | Tena Radocaj                            |
| Risk screening context             |                                         |
| Reason and socio-economic benefits |                                         |
| Risk assessment area               | Danube & Adriatic basins BA, HR, ME, RS |
| Taxonomy                           |                                         |
| Native range                       |                                         |
| Introduced range                   |                                         |
| URL                                |                                         |

|                                                |      | Response                                                                                                                                                                | Justification (references and/or other information) | Confidence                                                                                                                                                                                                                                                                                                                                                                                                                                                 |           |
|------------------------------------------------|------|-------------------------------------------------------------------------------------------------------------------------------------------------------------------------|-----------------------------------------------------|------------------------------------------------------------------------------------------------------------------------------------------------------------------------------------------------------------------------------------------------------------------------------------------------------------------------------------------------------------------------------------------------------------------------------------------------------------|-----------|
| A. Biogeography/ Historical                    |      |                                                                                                                                                                         |                                                     |                                                                                                                                                                                                                                                                                                                                                                                                                                                            |           |
| 1. Domestication/Cultivation                   |      |                                                                                                                                                                         |                                                     |                                                                                                                                                                                                                                                                                                                                                                                                                                                            |           |
| 1                                              | 1.01 | Has the taxon been the subject of domestication (or cultivation) for at least 20 generations?                                                                           | Yes                                                 | Fisheries: commercial; aquaculture: commercial; gamefish: yes (Fishbase)                                                                                                                                                                                                                                                                                                                                                                                   | High      |
| 2                                              | 1.02 | Is the taxon harvested in the wild and likely to be sold or used in its live form?                                                                                      | No                                                  | No                                                                                                                                                                                                                                                                                                                                                                                                                                                         | Low       |
| 3                                              | 1.03 | Does the taxon have invasive races, varieties, sub-taxa or congeners?                                                                                                   | No                                                  | No invasive races, varieties, sub-taxa or congeners.                                                                                                                                                                                                                                                                                                                                                                                                       | Low       |
| 2. Climate, distribution and introduction risk |      |                                                                                                                                                                         |                                                     |                                                                                                                                                                                                                                                                                                                                                                                                                                                            |           |
| 4                                              | 2.01 | How similar are the climatic conditions of the Risk Assessment (RA) area and the taxon's native range?                                                                  | High                                                | The similarity between climatic conditions RA area and native range is high. I use climatch.                                                                                                                                                                                                                                                                                                                                                               | Medium    |
| 5                                              | 2.02 | What is the quality of the climate matching data?                                                                                                                       | High                                                | Distribution Map and Climatch.                                                                                                                                                                                                                                                                                                                                                                                                                             | Very high |
| 6                                              | 2.03 | Is the taxon already present outside of captivity in the RA area?                                                                                                       | No                                                  | H. hucho is not present outside of captivity in the RA area.                                                                                                                                                                                                                                                                                                                                                                                               | Medium    |
| 7                                              | 2.04 | How many potential vectors could the taxon use to enter in the RA area?                                                                                                 | One                                                 | Stocking (U.S. Fish & Wildlife Service, April 2011 Revised, January 2019, February 2019 Web Version, 4/30/2019)                                                                                                                                                                                                                                                                                                                                            | Medium    |
| 8                                              | 2.05 | Is the taxon currently found in close proximity to, and likely to enter into, the RA area in the near future (e.g. unintentional and intentional introductions)?        | Yes                                                 | H. hucho is established in a neighbouring rivers. (Witkowski, A., Bajić, A., Treer, T., Hegediš, A., Marić, S., Šprem, N., ... & Kapusta, A. (2013). Past and present of and perspectives for the Danube huchen, Hucho hucho (L.), in the Danube basin. Fisheries & Aquatic Life, 21(3), 129-142).                                                                                                                                                         | Medium    |
| 3. Invasive elsewhere                          |      |                                                                                                                                                                         |                                                     |                                                                                                                                                                                                                                                                                                                                                                                                                                                            |           |
| 9                                              | 3.01 | Has the taxon become naturalised (established viable populations) outside its native range?                                                                             | Yes                                                 | In the 1950s it [H. hucho] was translocated for conservation purposes to some tributaries of the upper stretch of the Vistula River [Poland] where it established self-sustained populations (Witkowski 1996). Currently huchen is being stocked also into water courses of the Oder River catchment [Poland]. (Grabowska, J., J. Kotusz, and A. Witkowski. 2010. Alien invasive fish species in Polish waters: an overview. Folia Zoologica 59(1):73-85.) | High      |
| 10                                             | 3.02 | In the taxon's introduced range, are there known adverse impacts to wild stocks or commercial taxa?                                                                     | Yes                                                 | In one stretch of the Hornád River, Czechoslovakia, a transplanted and naturalized population of huchen had to be eradicated because the abundance of the brown trout and the grayling (Thymallus thymallus) significantly decreased (Skácel, 1976) (U.S. Fish & Wildlife Service, April 2011 Revised, January 2019, February 2019 Web Version, 4/30/2019).                                                                                                | Low       |
| 11                                             | 3.03 | In the taxon's introduced range, are there known adverse impacts to aquaculture?                                                                                        | No                                                  | No evidence                                                                                                                                                                                                                                                                                                                                                                                                                                                | Medium    |
| 12                                             | 3.04 | In the taxon's introduced range, are there known adverse impacts to ecosystem services?                                                                                 | Yes                                                 | May have adverse impact on some native species (competition). (U.S. Fish & Wildlife Service, April 2011 Revised, January 2019, February 2019 Web Version, 4/30/2019).                                                                                                                                                                                                                                                                                      | Low       |
| 13                                             | 3.05 | In the taxon's introduced range, are there known adverse socio-economic impacts?                                                                                        | No                                                  | No evidence                                                                                                                                                                                                                                                                                                                                                                                                                                                | Low       |
| B. Biology/ Ecology                            |      |                                                                                                                                                                         |                                                     |                                                                                                                                                                                                                                                                                                                                                                                                                                                            |           |
| 4. Undesirable (or persistence) traits         |      |                                                                                                                                                                         |                                                     |                                                                                                                                                                                                                                                                                                                                                                                                                                                            |           |
| 14                                             | 4.01 | Is it likely that the taxon will be poisonous or pose other risks to human health?                                                                                      | No                                                  | H. hucho is harmless (Fishbase)                                                                                                                                                                                                                                                                                                                                                                                                                            | Very high |
| 15                                             | 4.02 | Is it likely that the taxon will smother one or more native taxa (that are not threatened or protected)?                                                                | No                                                  | No evidence                                                                                                                                                                                                                                                                                                                                                                                                                                                | Low       |
| 16                                             | 4.03 | Are there any threatened or protected taxa that the non-native taxon would parasitise in the RA area?                                                                   | No                                                  | No                                                                                                                                                                                                                                                                                                                                                                                                                                                         | Very high |
| 17                                             | 4.04 | Is the taxon adaptable in terms of climatic and other environmental conditions, thus enhancing its potential persistence if it has invaded or could invade the RA area? | Yes                                                 | H. hucho is adaptable to climatic and other environmental conditions in the RA area. (Witkowski, A., Bajić, A., Treer, T., Hegediš, A., Marić, S., Šprem, N., ... & Kapusta, A. (2013). Past and present of and perspectives for the Danube huchen, Hucho hucho (L.), in the Danube basin. Fisheries & Aquatic Life, 21(3), 129-142).                                                                                                                      | High      |
| 18                                             | 4.05 | Is the taxon likely to disrupt food-web structure/function in aquatic ecosystems if it has invaded or is likely to invade the RA                                        | Yes                                                 | Competition (U.S. Fish & Wildlife Service, April 2011 Revised, January 2019, February 2019 Web Version, 4/30/2019).                                                                                                                                                                                                                                                                                                                                        | Low       |
| 19                                             | 4.06 | Is the taxon likely to exert adverse impacts on ecosystem services in the RA area?                                                                                      | No                                                  | (U.S. Fish & Wildlife Service, April 2011 Revised, January 2019, February 2019 Web Version, 4/30/2019).                                                                                                                                                                                                                                                                                                                                                    | High      |
| 20                                             | 4.07 | Is it likely that the taxon will host, and/or act as a vector for, recognised pests and infectious agents that are endemic in the RA area?                              | Yes                                                 | U.S. Fish & Wildlife Service, April 2011 Revised, January 2019, February 2019 Web Version, 4/30/2019 Infection with Gyrodactylus salaris is an OIE-reportable disease (OIE 2019). Popiolek et al. (2013) does not specify which species of Gyrodactylus can infect Hucho hucho                                                                                                                                                                             | Medium    |
| 21                                             | 4.08 | Is it likely that the taxon will host, and/or act as a vector for, recognised pests and infectious agents that are absent from (novel to) the RA area?                  | Yes                                                 | According to CABI (2019), Hucho hucho can carry the following diseases: infectious pancreatic necrosis, Renibacterium salmoninarum, bacterial kidney disease, whirling disease and lernaepodid infection of fish. (CABI, 2019)                                                                                                                                                                                                                             | Medium    |



|                                 |      |                                                                                                                                                                              |                |                                                                                                                                                                                                                                                                                                                                                                              |           |
|---------------------------------|------|------------------------------------------------------------------------------------------------------------------------------------------------------------------------------|----------------|------------------------------------------------------------------------------------------------------------------------------------------------------------------------------------------------------------------------------------------------------------------------------------------------------------------------------------------------------------------------------|-----------|
| 22                              | 4.09 | Is it likely that the taxon will achieve a body size that will make it more likely to be released from captivity?                                                            | Yes            | Max length : 150 cm TL (Fishbase)                                                                                                                                                                                                                                                                                                                                            | Very high |
| 23                              | 4.10 | Is the taxon capable of sustaining itself in a range of water velocity conditions (e.g. versatile in habitat use)?                                                           | Yes            | Usually solitary, inhabits deeper regions of swift flowing streams with oxygen rich waters. (Fishbase)                                                                                                                                                                                                                                                                       | Very high |
| 24                              | 4.11 | Is it likely that the taxon's mode of existence (e.g. excretion of by-products) or behaviours (e.g. feeding) will reduce habitat quality for native taxa?                    | No             | No evidence                                                                                                                                                                                                                                                                                                                                                                  | Low       |
| 25                              | 4.12 | Is the taxon likely to maintain a viable population even when present in low densities (or persisting in adverse conditions by way of a dormant form)?                       | No             | Fishbase                                                                                                                                                                                                                                                                                                                                                                     | Low       |
| <b>5. Resource exploitation</b> |      |                                                                                                                                                                              |                |                                                                                                                                                                                                                                                                                                                                                                              |           |
| 26                              | 5.01 | Is the taxon likely to consume threatened or protected native taxa in the RA area?                                                                                           | Yes            | Juveniles feed mainly on invertebrates and adults mostly on fishes, but also prey on amphibians, reptiles, small mammals and waterfowl (Fishbase)                                                                                                                                                                                                                            | Very high |
| 27                              | 5.02 | Is the taxon likely to sequester food resources (including nutrients) to the detriment of native taxa in the RA area?                                                        | Not applicable | Not applicable                                                                                                                                                                                                                                                                                                                                                               | Very high |
| <b>6. Reproduction</b>          |      |                                                                                                                                                                              |                |                                                                                                                                                                                                                                                                                                                                                                              |           |
| 28                              | 6.01 | Is the taxon likely to exhibit parental care and/or to reduce age-at-maturity in response to environmental conditions?                                                       | Yes            | They both defend the spawning site up to 2 weeks after spawning. (Fishbase)                                                                                                                                                                                                                                                                                                  | Low       |
| 29                              | 6.02 | Is the taxon likely to produce viable gametes or propagules (in the RA area)?                                                                                                | Yes            | Witkowski, A., Bajić, A., Treer, T., Hegediš, A., Marić, S., Šprem, N., ... & Kapusta, A. (2013). Past and present of and perspectives for the Danube huchen, Hucho hucho (L.), in the Danube basin. Fisheries & Aquatic Life, 21(3), 129-142).                                                                                                                              | High      |
| 30                              | 6.03 | Is the taxon likely to hybridise naturally with native taxa?                                                                                                                 | No             | No evidence                                                                                                                                                                                                                                                                                                                                                                  | Low       |
| 31                              | 6.04 | Is the taxon likely to be hermaphroditic or to display asexual reproduction?                                                                                                 | No             | No                                                                                                                                                                                                                                                                                                                                                                           | Very high |
| 32                              | 6.05 | Is the taxon dependent on the presence of another taxon (or specific habitat features) to complete its life cycle?                                                           | Yes            | Spawns in very clean gravel in fast-flowing water, usually in small river tributaries. (Freyhof, J. & Kottelat, M. 2008. Hucho hucho. The IUCN Red List of Threatened Species)                                                                                                                                                                                               | Low       |
| 33                              | 6.06 | Is the taxon known (or likely) to produce a large number of propagules or offspring within a short time span (e.g. < 1 year)?                                                | No             | Freyhof, J. & Kottelat, M. 2008. Hucho hucho. The IUCN Red List of Threatened Species                                                                                                                                                                                                                                                                                        | Low       |
| 34                              | 6.07 | How many time units (days, months, years) does the taxon require to reach the age-at-first-reproduction?                                                                     | 4              | Males reproduce for the first time at 3-4 years and about 1 kg, females at 4-5 years and 2-3 kg (Freyhof, J. & Kottelat, M. 2008. Hucho hucho. The IUCN Red List of Threatened Species 2008)                                                                                                                                                                                 | Medium    |
| <b>7. Dispersal mechanisms</b>  |      |                                                                                                                                                                              |                |                                                                                                                                                                                                                                                                                                                                                                              |           |
| 35                              | 7.01 | How many potential internal vectors/pathways could the taxon use to disperse within the RA area (with suitable protected areas (e.g. MCZ, MPA, SSSI)?                        | One            | Human influence                                                                                                                                                                                                                                                                                                                                                              | Medium    |
| 36                              | 7.02 | Will any of these vectors/pathways bring the taxon in close proximity to one or more protected areas (e.g. MCZ, MPA, SSSI)?                                                  | No             | No                                                                                                                                                                                                                                                                                                                                                                           | Very high |
| 37                              | 7.03 | Does the taxon have a means of actively attaching itself to hard substrata (e.g. ship hulls, pilings, buoys) such that it enhances the likelihood of dispersal?              | No             | No adaptations                                                                                                                                                                                                                                                                                                                                                               | Very high |
| 38                              | 7.04 | Is natural dispersal of the taxon likely to occur as eggs (for animals) or as propagules (for plants: seeds, spores) in the RA area?                                         | No             | Spawns on gravelly bottom where female makes a shallow hole where the eggs are laid and covered with gravel (Ref. 682). Both sexes covered the eggs with substrate. (Fishbase)                                                                                                                                                                                               | High      |
| 39                              | 7.05 | Is natural dispersal of the taxon likely to occur as larvae/juveniles (for animals) or as fragments/seedlings (for plants) in the RA area?                                   | Yes            | Freyhof, J. & Kottelat, M. 2008. Hucho hucho. The IUCN Red List of Threatened Species 2008                                                                                                                                                                                                                                                                                   | Low       |
| 40                              | 7.06 | Are older life stages of the taxon likely to migrate in the RA area for reproduction?                                                                                        | Yes            | Sexually mature fish migrate upstream into smaller and shallower (0.3-1.5 m deep) streams (Ref. 26170), usually in upper reaches of tributaries (Fishbase)                                                                                                                                                                                                                   | Very high |
| 41                              | 7.07 | Are propagules or eggs of the taxon likely to be dispersed in the RA area by other animals?                                                                                  | No             | Fishbase                                                                                                                                                                                                                                                                                                                                                                     | High      |
| 42                              | 7.08 | Is dispersal of the taxon along any of the vectors/pathways mentioned in the previous seven questions (35-41; i.e. both unintentional or intentional) likely to be           | Yes            | There is the possibility of a high rate of dispersal of taxa. E.g. when a fertilized individual enters a new area by some kind of dispersal.                                                                                                                                                                                                                                 | Low       |
| 43                              | 7.09 | Is dispersal of the taxon density dependent?                                                                                                                                 | No             | No evidence                                                                                                                                                                                                                                                                                                                                                                  | Low       |
| <b>8. Tolerance attributes</b>  |      |                                                                                                                                                                              |                |                                                                                                                                                                                                                                                                                                                                                                              |           |
| 44                              | 8.01 | Is the taxon able to withstand being out of water for extended periods (e.g. minimum of one or more hours) at some stage of its life cycle?                                  | No             | No, it sensitive species                                                                                                                                                                                                                                                                                                                                                     | Very high |
| 45                              | 8.02 | Is the taxon tolerant of a wide range of water quality conditions relevant to that taxon? [In the Justification field, indicate the relevant water quality variable(s) being | No             | Usually solitary, inhabits deeper regions of swift flowing streams with oxygen rich waters. Adults are territorial but not solitary (Fishbase)                                                                                                                                                                                                                               | Very high |
| 46                              | 8.03 | Can the taxon be controlled or eradicated in the wild with chemical, biological, or other agents/means?                                                                      | No             | No                                                                                                                                                                                                                                                                                                                                                                           | Very high |
| 47                              | 8.04 | Is the taxon likely to tolerate or benefit from environmental/human disturbance?                                                                                             | No             | Historically overfishing, pollution and dam construction caused the decline of the species. Currently the main threats are hydropower stations which heavily regulate flow regime (which impacts upon their prey and habitat), and pollution in some countries (Bosnia and Croatia). (Freyhof, J. & Kottelat, M. 2008. Hucho hucho. The IUCN Red List of Threatened Species) | Very high |
| 48                              | 8.05 | Is the taxon able to tolerate salinity levels that are higher or lower than those found in its usual environment?                                                            | No             | Freshwater fish                                                                                                                                                                                                                                                                                                                                                              | Very high |

|                          |      |                                                                                                                                                              |           |                                                                                                                                                                                                             |        |
|--------------------------|------|--------------------------------------------------------------------------------------------------------------------------------------------------------------|-----------|-------------------------------------------------------------------------------------------------------------------------------------------------------------------------------------------------------------|--------|
| 49                       | 8.06 | Are there effective natural enemies (predators) of the taxon present in the RA                                                                               | Yes       | Juvenile- catfish, zander, pike..                                                                                                                                                                           | Medium |
| <b>C. Climate change</b> |      |                                                                                                                                                              |           |                                                                                                                                                                                                             |        |
| <b>9. Climate change</b> |      |                                                                                                                                                              |           |                                                                                                                                                                                                             |        |
| 50                       | 9.01 | Under the predicted future climatic conditions, are the risks of entry into the RA area posed by the taxon likely to increase, decrease or not change?       | Decrease  | The risks of entry into the RA area is no change. Maybe because of human impact, but not because of climate change.                                                                                         | Medium |
| 51                       | 9.02 | Under the predicted future climatic conditions, are the risks of establishment posed by the taxon likely to increase, decrease or not change?                | Decrease  | Comte, L., Buisson, L., Daufresne, M., & Grenouillet, G. (2013). Climate-induced changes in the distribution of freshwater fish: observed and predicted trends. <i>Freshwater Biology</i> , 58(4), 625-639. | Medium |
| 52                       | 9.03 | Under the predicted future climatic conditions, are the risks of dispersal within the RA area posed by the taxon likely to increase, decrease or not change? | Decrease  | Comte, L., Buisson, L., Daufresne, M., & Grenouillet, G. (2013). Climate-induced changes in the distribution of freshwater fish: observed and predicted trends. <i>Freshwater Biology</i> , 58(4), 625-639. | Medium |
| 53                       | 9.04 | Under the predicted future climatic conditions, what is the likely magnitude of future potential impacts on biodiversity and/or ecological integrity/status? | Lower     | Comte, L., Buisson, L., Daufresne, M., & Grenouillet, G. (2013). Climate-induced changes in the distribution of freshwater fish: observed and predicted trends. <i>Freshwater Biology</i> , 58(4), 625-639. | Medium |
| 54                       | 9.05 | Under the predicted future climatic conditions, what is the likely magnitude of future potential impacts on ecosystem structure and/or function?             | Lower     | Comte, L., Buisson, L., Daufresne, M., & Grenouillet, G. (2013). Climate-induced changes in the distribution of freshwater fish: observed and predicted trends. <i>Freshwater Biology</i> , 58(4), 625-639. | Medium |
| 55                       | 9.06 | Under the predicted future climatic conditions, what is the likely magnitude of future potential impacts on ecosystem services/socio-economic factors?       | No change | Comte, L., Buisson, L., Daufresne, M., & Grenouillet, G. (2013). Climate-induced changes in the distribution of freshwater fish: observed and predicted trends. <i>Freshwater Biology</i> , 58(4), 625-639. | Medium |

| Statistics                                     |              |
|------------------------------------------------|--------------|
| Scores                                         |              |
| <b>BRA</b>                                     | <b>15.0</b>  |
| <b>BRA Outcome</b>                             | <b>-</b>     |
| <b>BRA+CCA</b>                                 | <b>5.0</b>   |
| <b>BRA+CCA Outcome</b>                         | <b>-</b>     |
| Score partition                                |              |
| <b>A. Biogeography/Historical</b>              | <b>10.0</b>  |
| 1. Domestication/Cultivation                   | 0.0          |
| 2. Climate, distribution and introduction risk | 0.0          |
| 3. Invasive elsewhere                          | 10.0         |
| <b>B. Biology/Ecology</b>                      | <b>5.0</b>   |
| 4. Undesirable (or persistence) traits         | 6.0          |
| 5. Resource exploitation                       | 5.0          |
| 6. Reproduction                                | -2.0         |
| 7. Dispersal mechanisms                        | 0.0          |
| 8. Tolerance attributes                        | -4.0         |
| <b>C. Climate change</b>                       | <b>-10.0</b> |
| 9. Climate change                              | -10.0        |
| Answered Questions                             |              |
| <b>Total</b>                                   | <b>55</b>    |
| <b>A. Biogeography/Historical</b>              | <b>13</b>    |
| 1. Domestication/Cultivation                   | 3            |
| 2. Climate, distribution and introduction risk | 5            |
| 3. Invasive elsewhere                          | 5            |
| <b>B. Biology/Ecology</b>                      | <b>36</b>    |
| 4. Undesirable (or persistence) traits         | 12           |
| 5. Resource exploitation                       | 2            |
| 6. Reproduction                                | 7            |
| 7. Dispersal mechanisms                        | 9            |
| 8. Tolerance attributes                        | 6            |
| <b>C. Climate change</b>                       | <b>6</b>     |
| 9. Climate change                              | 6            |
| Sectors affected                               |              |
| <b>Commercial</b>                              | <b>6</b>     |
| <b>Environmental</b>                           | <b>6</b>     |
| <b>Species or population nuisance traits</b>   | <b>-6</b>    |

| Thresholds     |             |
|----------------|-------------|
| <b>BRA</b>     | <b>-</b>    |
| <b>BRA+CCA</b> | <b>-</b>    |
| Confidence     |             |
| <b>BRA+CCA</b> | <b>0.60</b> |
| <b>BRA</b>     | <b>0.62</b> |
| <b>CCA</b>     | <b>0.50</b> |

| Date and Time       |
|---------------------|
| 19/05/2021 12:32:12 |

## AS-ISK v2

| Taxon and Assessor details         |                                         |
|------------------------------------|-----------------------------------------|
| Category                           | Fishes and Lampreys (freshwater)        |
| Taxon name                         | <i>Oncorhynchus mykiss</i>              |
| Common name                        | rainbow trout                           |
| Assessor                           | Ana Marić                               |
| Risk screening context             |                                         |
| Reason and socio-economic benefits |                                         |
| Risk assessment area               | Danube & Adriatic basins BA, HR, ME, RS |
| Taxonomy                           |                                         |
| Native range                       |                                         |
| Introduced range                   |                                         |
| URL                                |                                         |

|                                                |      | Response                                                                                                                                                                | Justification (references and/or other information) | Confidence                                                                                                                                                                                                                                     |           |
|------------------------------------------------|------|-------------------------------------------------------------------------------------------------------------------------------------------------------------------------|-----------------------------------------------------|------------------------------------------------------------------------------------------------------------------------------------------------------------------------------------------------------------------------------------------------|-----------|
| A. Biogeography/Historical                     |      |                                                                                                                                                                         |                                                     |                                                                                                                                                                                                                                                |           |
| 1. Domestication/Cultivation                   |      |                                                                                                                                                                         |                                                     |                                                                                                                                                                                                                                                |           |
| 1                                              | 1.01 | Has the taxon been the subject of domestication (or cultivation) for at least 20 generations?                                                                           | Yes                                                 | Kottelat, M. and J. Freyhof, 2007. Handbook of European freshwater fishes. Publications Kottelat, Cornol and Freyhof, Berlin. 646 pp <a href="https://www.fishbase.se/summary/Oncorhynchus-">https://www.fishbase.se/summary/Oncorhynchus-</a> | Very high |
| 2                                              | 1.02 | Is the taxon harvested in the wild and likely to be sold or used in its live form?                                                                                      | Yes                                                 | Frimodt, C., 1995. Multilingual illustrated guide to the world's commercial coldwater fish. Fishing News Books, Osney Mead, Oxford, England. 215 p.                                                                                            | Very high |
| 3                                              | 1.03 | Does the taxon have invasive races, varieties, sub-taxa or congeners?                                                                                                   | Yes                                                 | <a href="http://www.iucngisd.org/gisd/species.php?sc=103">http://www.iucngisd.org/gisd/species.php?sc=103</a> invasive itself, does it count?                                                                                                  | Very high |
| 2. Climate, distribution and introduction risk |      |                                                                                                                                                                         |                                                     |                                                                                                                                                                                                                                                |           |
| 4                                              | 2.01 | How similar are the climatic conditions of the Risk Assessment (RA) area and the taxon's native range?                                                                  | Medium                                              | Climach                                                                                                                                                                                                                                        | High      |
| 5                                              | 2.02 | What is the quality of the climate matching data?                                                                                                                       | Low                                                 | Very unsure                                                                                                                                                                                                                                    | High      |
| 6                                              | 2.03 | Is the taxon already present outside of captivity in the RA area?                                                                                                       | Yes                                                 | Risks to Stocks of Native Trout of the Genus <i>Salmo</i> (Actinopterygii: Salmoniformes: Salmonidae) of Serbia and Management for their Recovery. Lovili u Belosavcu                                                                          | Very high |
| 7                                              | 2.04 | How many potential vectors could the taxon use to enter in the RA area?                                                                                                 | >1                                                  | Stocking and escape from farms                                                                                                                                                                                                                 | Very high |
| 8                                              | 2.05 | Is the taxon currently found in close proximity to, and likely to enter into, the RA area in the near future (e.g. unintentional and intentional introductions)?        | Yes                                                 | A brief review of non-native freshwater fishes in Slovenia M. Povž, S. Šumer                                                                                                                                                                   | Very high |
| 3. Invasive elsewhere                          |      |                                                                                                                                                                         |                                                     |                                                                                                                                                                                                                                                |           |
| 9                                              | 3.01 | Has the taxon become naturalised (established viable populations) outside its native range?                                                                             | Yes                                                 | A brief review of non-native freshwater fishes in Slovenia M. Povž, S. Šumer Invasions of rainbow trout and brown trout in Japan: A comparison of invasiveness and impact on native species Koh Hasegawa 2019                                  | Very high |
| 10                                             | 3.02 | In the taxon's introduced range, are there known adverse impacts to wild stocks or commercial taxa?                                                                     | Yes                                                 | The impact of introduced brown and r bow trout on native fish: the case of Australasia TODD A. CROWL ~*, COLIN R. TOWNSEND and ANGUS R. MCINTOSH 1992....                                                                                      | Very high |
| 11                                             | 3.03 | In the taxon's introduced range, are there known adverse impacts to aquaculture?                                                                                        | No                                                  | Check ref                                                                                                                                                                                                                                      | Medium    |
| 12                                             | 3.04 | In the taxon's introduced range, are there known adverse impacts to ecosystem                                                                                           | No                                                  | Check                                                                                                                                                                                                                                          | Medium    |
| 13                                             | 3.05 | In the taxon's introduced range, are there known adverse socio-economic impacts?                                                                                        | No                                                  | It was introduced intentionally                                                                                                                                                                                                                | High      |
| B. Biology/Ecology                             |      |                                                                                                                                                                         |                                                     |                                                                                                                                                                                                                                                |           |
| 4. Undesirable (or persistence) traits         |      |                                                                                                                                                                         |                                                     |                                                                                                                                                                                                                                                |           |
| 14                                             | 4.01 | Is it likely that the taxon will be poisonous or pose other risks to human health?                                                                                      | No                                                  | No                                                                                                                                                                                                                                             | Very high |
| 15                                             | 4.02 | Is it likely that the taxon will smother one or more native taxa (that are not threatened or protected)?                                                                | Yes                                                 | Invasions of rainbow trout and brown trout in Japan: A comparison of invasiveness and impact on native species Koh Hasegawa                                                                                                                    | Very high |
| 16                                             | 4.03 | Are there any threatened or protected taxa that the non-native taxon would parasitise in the RA area?                                                                   | No                                                  | No                                                                                                                                                                                                                                             | Very high |
| 17                                             | 4.04 | Is the taxon adaptable in terms of climatic and other environmental conditions, thus enhancing its potential persistence if it has invaded or could invade the RA area? | Yes                                                 | Kottelat, M. and J. Freyhof, 2007. Handbook of European freshwater fishes. Publications Kottelat, Cornol and Freyhof, Berlin. 646 pp                                                                                                           | Very high |
| 18                                             | 4.05 | Is the taxon likely to disrupt food-web structure/function in aquatic ecosystems if it has invaded or is likely to invade the RA                                        | Yes                                                 | A handbook of global freshwater invasive species. Francis. 2012                                                                                                                                                                                | Very high |
| 19                                             | 4.06 | Is the taxon likely to exert adverse impacts on ecosystem services in the RA area?                                                                                      | No                                                  | No                                                                                                                                                                                                                                             | High      |
| 20                                             | 4.07 | Is it likely that the taxon will host, and/or act as a vector for, recognised pests and infectious agents that are endemic in the RA                                    | Yes                                                 | Invasions of rainbow trout and brown trout in Japan: A comparison of invasiveness and impact on native species Koh Hasegawa.2019                                                                                                               | High      |
| 21                                             | 4.08 | Is it likely that the taxon will host, and/or act as a vector for, recognised pests and infectious agents that are absent from (novel to) the RA area?                  | Yes                                                 | Invasions of rainbow trout and brown trout in Japan: A comparison of invasiveness and impact on native species Koh Hasegawa. 2019                                                                                                              | Very high |
| 22                                             | 4.09 | Is it likely that the taxon will achieve a body size that will make it more likely to be released from captivity?                                                       | Yes                                                 | Invasions of rainbow trout and brown trout in Japan: A comparison of invasiveness and impact on native species Koh Hasegawa. 2002                                                                                                              | Very high |
| 23                                             | 4.10 | Is the taxon capable of sustaining itself in a range of water velocity conditions (e.g. versatile in habitat use)?                                                      | Yes                                                 | Invasions of rainbow trout and brown trout in Japan: A comparison of invasiveness and impact on native species Koh Hasegawa. 2002                                                                                                              | Very high |
| 24                                             | 4.11 | Is it likely that the taxon's mode of existence (e.g. excretion of by-products) or behaviours (e.g. feeding) will reduce habitat quality for native taxa?               | No                                                  | Invasions of rainbow trout and brown trout in Japan: A comparison of invasiveness and impact on native species Koh Hasegawa                                                                                                                    | Medium    |

|                                 |      |                                                                                                                                                                              |          |                                                                                                                                                                                 |           |
|---------------------------------|------|------------------------------------------------------------------------------------------------------------------------------------------------------------------------------|----------|---------------------------------------------------------------------------------------------------------------------------------------------------------------------------------|-----------|
| 25                              | 4.12 | Is the taxon likely to maintain a viable population even when present in low densities (or persisting in adverse conditions by way of a dormant form)?                       | Yes      | Invasions of rainbow trout and brown trout in Japan: A comparison of invasiveness and impact on native species Koh Hasegawa. 2019.                                              | High      |
| <b>5. Resource exploitation</b> |      |                                                                                                                                                                              |          |                                                                                                                                                                                 |           |
| 26                              | 5.01 | Is the taxon likely to consume threatened or protected native taxa in the RA area?                                                                                           | Yes      | Invasions of rainbow trout and brown trout in Japan: A comparison of invasiveness and impact on native species Koh                                                              | Very high |
| 27                              | 5.02 | Is the taxon likely to sequester food resources (including nutrients) to the detriment of native taxa in the RA area?                                                        | Yes      | Invasions of rainbow trout and brown trout in Japan: A comparison of invasiveness and impact on native species Koh Hasegawa.2019                                                | High      |
| <b>6. Reproduction</b>          |      |                                                                                                                                                                              |          |                                                                                                                                                                                 |           |
| 28                              | 6.01 | Is the taxon likely to exhibit parental care and/or to reduce age-at-maturity in response to environmental conditions?                                                       | Yes      | Invasions of rainbow trout and brown trout in Japan: A comparison of invasiveness and impact on native species Koh Hasegawa. 2019                                               | Very high |
| 29                              | 6.02 | Is the taxon likely to produce viable gametes or propagules (in the RA area)?                                                                                                | Yes      | Kottelat 2007                                                                                                                                                                   | Very high |
| 30                              | 6.03 | Is the taxon likely to hybridise naturally with native taxa?                                                                                                                 | Yes      | Slovenia check                                                                                                                                                                  | Very high |
| 31                              | 6.04 | Is the taxon likely to be hermaphroditic or to display asexual reproduction?                                                                                                 | No       | No                                                                                                                                                                              | Very high |
| 32                              | 6.05 | Is the taxon dependent on the presence of another taxon (or specific habitat features) to complete its life cycle?                                                           | No       | No                                                                                                                                                                              | Very high |
| 33                              | 6.06 | Is the taxon known (or likely) to produce a large number of propagules or offspring within a short time span (e.g. < 1 year)?                                                | Yes      | Kottekat 2007                                                                                                                                                                   | High      |
| 34                              | 6.07 | How many time units (days, months, years) does the taxon require to reach the age-at-first-reproduction?                                                                     | 2        | Kottelat 2007                                                                                                                                                                   | Very high |
| <b>7. Dispersal mechanisms</b>  |      |                                                                                                                                                                              |          |                                                                                                                                                                                 |           |
| 35                              | 7.01 | How many potential internal vectors/pathways could the taxon use to disperse within the RA area (with suitable protected areas (e.g. MCZ, MPA, SSSI)?                        | >1       | Escape stocking                                                                                                                                                                 | Very high |
| 36                              | 7.02 | Will any of these vectors/pathways bring the taxon in close proximity to one or more protected areas (e.g. MCZ, MPA, SSSI)?                                                  | Yes      | Especially stocking                                                                                                                                                             | Very high |
| 37                              | 7.03 | Does the taxon have a means of actively attaching itself to hard substrata (e.g. ship hulls, pilings, buoys) such that it enhances the likelihood of dispersal?              | No       | no                                                                                                                                                                              | Very high |
| 38                              | 7.04 | Is natural dispersal of the taxon likely to occur as eggs (for animals) or as propagules (for plants: seeds, spores) in the RA area?                                         | No       | Kottelat 2007                                                                                                                                                                   | Very high |
| 39                              | 7.05 | Is natural dispersal of the taxon likely to occur as larvae/juveniles (for animals) or as fragments/seedlings (for plants) in the RA area?                                   | Yes      | Kottelat 2007                                                                                                                                                                   | High      |
| 40                              | 7.06 | Are older life stages of the taxon likely to migrate in the RA area for reproduction?                                                                                        | Yes      | Kottelat 2007                                                                                                                                                                   | Very high |
| 41                              | 7.07 | Are propagules or eggs of the taxon likely to be dispersed in the RA area by other animals?                                                                                  | No       | Kottelat 2007                                                                                                                                                                   | Very high |
| 42                              | 7.08 | Is dispersal of the taxon along any of the vectors/pathways mentioned in the previous seven questions (35–41; i.e. both unintentional or intentional) likely to be           | Yes      | Invasions of rainbow trout and brown trout in Japan: A comparison of invasiveness and impact on native species Koh Hasegawa 2019                                                | Very high |
| 43                              | 7.09 | Is dispersal of the taxon density dependent?                                                                                                                                 | Yes      | Probably, partial migratory                                                                                                                                                     | Medium    |
| <b>8. Tolerance attributes</b>  |      |                                                                                                                                                                              |          |                                                                                                                                                                                 |           |
| 44                              | 8.01 | Is the taxon able to withstand being out of water for extended periods (e.g. minimum of one or more hours) at some stage of its life cycle?                                  | No       | Kottelat 2007                                                                                                                                                                   | Very high |
| 45                              | 8.02 | Is the taxon tolerant of a wide range of water quality conditions relevant to that taxon? [In the Justification field, indicate the relevant water quality variable(s) being | No       | Small-scale rainbow trout farming FAO 2011.                                                                                                                                     | Very high |
| 46                              | 8.03 | Can the taxon be controlled or eradicated in the wild with chemical, biological, or other agents/means?                                                                      | No       | Recolonization by the mountain galaxias Galaxias olidus of a montane stream after the eradication of rainbow trout Oncorhynchus mykiss Mark Lintermans 2000                     | High      |
| 47                              | 8.04 | Is the taxon likely to tolerate or benefit from environmental/human disturbance?                                                                                             | Yes      | MAYbe flood?                                                                                                                                                                    | High      |
| 48                              | 8.05 | Is the taxon able to tolerate salinity levels that are higher or lower than those found in its usual environment?                                                            | Yes      | Kottelat 2007                                                                                                                                                                   | Very high |
| 49                              | 8.06 | Are there effective natural enemies (predators) of the taxon present in the RA                                                                                               | Yes      | Fish and mamals                                                                                                                                                                 | Very high |
| <b>C. Climate change</b>        |      |                                                                                                                                                                              |          |                                                                                                                                                                                 |           |
| <b>9. Climate change</b>        |      |                                                                                                                                                                              |          |                                                                                                                                                                                 |           |
| 50                              | 9.01 | Under the predicted future climatic conditions, are the risks of entry into the RA area posed by the taxon likely to increase, decrease or not change?                       | Increase | Assessing the impact of a downscaled climate change simulation on the fish fauna in an Inner-Alpine River C. Matulla & S. Schmutz & A. Melcher & T. Gerersdorfer & P. Haas 2007 | Very high |
| 51                              | 9.02 | Under the predicted future climatic conditions, are the risks of establishment posed by the taxon likely to increase, decrease or not change?                                | Increase | Assessing the impact of a downscaled climate change simulation on the fish fauna in an Inner-Alpine River C. Matulla & S. Schmutz & A. Melcher & T. Gerersdorfer & P. Haas 2007 | Very high |
| 52                              | 9.03 | Under the predicted future climatic conditions, are the risks of dispersal within the RA area posed by the taxon likely to increase, decrease or not change?                 | Increase | Assessing the impact of a downscaled climate change simulation on the fish fauna in an Inner-Alpine River C. Matulla & S. Schmutz & A. Melcher & T. Gerersdorfer & P. Haas 2007 | Very high |

|    |      |                                                                                                                                                              |           |                                                                                                                                                                                 |           |
|----|------|--------------------------------------------------------------------------------------------------------------------------------------------------------------|-----------|---------------------------------------------------------------------------------------------------------------------------------------------------------------------------------|-----------|
| 53 | 9.04 | Under the predicted future climatic conditions, what is the likely magnitude of future potential impacts on biodiversity and/or ecological integrity/status? | Higher    | Assessing the impact of a downscaled climate change simulation on the fish fauna in an Inner-Alpine River C. Matulla & S. Schmutz & A. Melcher & T. Gerersdorfer & P. Haas 2007 | High      |
| 54 | 9.05 | Under the predicted future climatic conditions, what is the likely magnitude of future potential impacts on ecosystem structure and/or function?             | Higher    | Assessing the impact of a downscaled climate change simulation on the fish fauna in an Inner-Alpine River C. Matulla & S. Schmutz & A. Melcher & T. Gerersdorfer & P. Haas 2007 | Very high |
| 55 | 9.06 | Under the predicted future climatic conditions, what is the likely magnitude of future potential impacts on ecosystem services/socio-economic factors?       | No change | Assessing the impact of a downscaled climate change simulation on the fish fauna in an Inner-Alpine River C. Matulla & S. Schmutz & A. Melcher & T. Gerersdorfer & P. Haas 2007 | High      |

| Statistics                                     |             |
|------------------------------------------------|-------------|
| Scores                                         |             |
| <b>BRA</b>                                     | <b>37.0</b> |
| <b>BRA Outcome</b>                             | <b>-</b>    |
| <b>BRA+CCA</b>                                 | <b>47.0</b> |
| <b>BRA+CCA Outcome</b>                         | <b>-</b>    |
| Score partition                                |             |
| <b>A. Biogeography/Historical</b>              | <b>12.0</b> |
| 1. Domestication/Cultivation                   | 4.0         |
| 2. Climate, distribution and introduction risk | 2.0         |
| 3. Invasive elsewhere                          | 6.0         |
| <b>B. Biology/Ecology</b>                      | <b>25.0</b> |
| 4. Undesirable (or persistence) traits         | 8.0         |
| 5. Resource exploitation                       | 7.0         |
| 6. Reproduction                                | 4.0         |
| 7. Dispersal mechanisms                        | 3.0         |
| 8. Tolerance attributes                        | 3.0         |
| <b>C. Climate change</b>                       | <b>10.0</b> |
| 9. Climate change                              | 10.0        |
| Answered Questions                             |             |
| <b>Total</b>                                   | <b>55</b>   |
| <b>A. Biogeography/Historical</b>              | <b>13</b>   |
| 1. Domestication/Cultivation                   | 3           |
| 2. Climate, distribution and introduction risk | 5           |
| 3. Invasive elsewhere                          | 5           |
| <b>B. Biology/Ecology</b>                      | <b>36</b>   |
| 4. Undesirable (or persistence) traits         | 12          |
| 5. Resource exploitation                       | 2           |
| 6. Reproduction                                | 7           |
| 7. Dispersal mechanisms                        | 9           |
| 8. Tolerance attributes                        | 6           |
| <b>C. Climate change</b>                       | <b>6</b>    |
| 9. Climate change                              | 6           |
| Sectors affected                               |             |
| <b>Commercial</b>                              | <b>11</b>   |
| <b>Environmental</b>                           | <b>11</b>   |
| <b>Species or population nuisance traits</b>   | <b>30</b>   |

| Thresholds     |             |
|----------------|-------------|
| <b>BRA</b>     | <b>-</b>    |
| <b>BRA+CCA</b> | <b>-</b>    |
| Confidence     |             |
| <b>BRA+CCA</b> | <b>0.90</b> |
| <b>BRA</b>     | <b>0.90</b> |
| <b>CCA</b>     | <b>0.92</b> |

| Date and Time       |  |
|---------------------|--|
| 22/05/2021 00:51:42 |  |

## AS-ISK v2

| Taxon and Assessor details         |                                         |
|------------------------------------|-----------------------------------------|
| Category                           | Fishes and Lampreys (freshwater)        |
| Taxon name                         | <i>Oncorhynchus mykiss</i>              |
| Common name                        | rainbow trout                           |
| Assessor                           | Ivan Špelić                             |
| Risk screening context             |                                         |
| Reason and socio-economic benefits |                                         |
| Risk assessment area               | Danube & Adriatic basins BA, HR, ME, RS |
| Taxonomy                           |                                         |
| Native range                       |                                         |
| Introduced range                   |                                         |
| URL                                |                                         |

|                                                |      | Response                                                                                                                                                                | Justification (references and/or other information) | Confidence                                                                                                                                                                                                                                                                                                                                                                      |           |
|------------------------------------------------|------|-------------------------------------------------------------------------------------------------------------------------------------------------------------------------|-----------------------------------------------------|---------------------------------------------------------------------------------------------------------------------------------------------------------------------------------------------------------------------------------------------------------------------------------------------------------------------------------------------------------------------------------|-----------|
| A. Biogeography/Historical                     |      |                                                                                                                                                                         |                                                     |                                                                                                                                                                                                                                                                                                                                                                                 |           |
| 1. Domestication/Cultivation                   |      |                                                                                                                                                                         |                                                     |                                                                                                                                                                                                                                                                                                                                                                                 |           |
| 1                                              | 1.01 | Has the taxon been the subject of domestication (or cultivation) for at least 20 generations?                                                                           | Yes                                                 | FAO                                                                                                                                                                                                                                                                                                                                                                             | Very high |
| 2                                              | 1.02 | Is the taxon harvested in the wild and likely to be sold or used in its live form?                                                                                      | No                                                  | Not harvested but farmed and used for stocking (Stanković et al. 2015).                                                                                                                                                                                                                                                                                                         | Medium    |
| 3                                              | 1.03 | Does the taxon have invasive races, varieties, sub-taxa or congeners?                                                                                                   | No                                                  | Baruš V. and Oliva O. 1995. Fauna of the Czech and Slovak Republics. Volume 28/2. Fishes - Osteichthyes. Academia, Praha. (in Czech with English summary).                                                                                                                                                                                                                      | Very high |
| 2. Climate, distribution and introduction risk |      |                                                                                                                                                                         |                                                     |                                                                                                                                                                                                                                                                                                                                                                                 |           |
| 4                                              | 2.01 | How similar are the climatic conditions of the Risk Assessment (RA) area and the taxon's native range?                                                                  | High                                                | Climatch                                                                                                                                                                                                                                                                                                                                                                        | Medium    |
| 5                                              | 2.02 | What is the quality of the climate matching data?                                                                                                                       | Medium                                              | Climatch                                                                                                                                                                                                                                                                                                                                                                        | High      |
| 6                                              | 2.03 | Is the taxon already present outside of captivity in the RA area?                                                                                                       | Yes                                                 | Stanković et al. 2015                                                                                                                                                                                                                                                                                                                                                           | Very high |
| 7                                              | 2.04 | How many potential vectors could the taxon use to enter in the RA area?                                                                                                 | Not applicable                                      | Already present (Froese, R. and D. Pauly. Editors. 2021.FishBase. World Wide Web electronic publication. www.fishbase.org, ( 02/2021 )).                                                                                                                                                                                                                                        | Very high |
| 8                                              | 2.05 | Is the taxon currently found in close proximity to, and likely to enter into, the RA area in the near future (e.g. unintentional and intentional introductions)?        | Not applicable                                      | Already present (Froese, R. and D. Pauly. Editors. 2021.FishBase. World Wide Web electronic publication. www.fishbase.org, ( 02/2021 )).                                                                                                                                                                                                                                        | Very high |
| 3. Invasive elsewhere                          |      |                                                                                                                                                                         |                                                     |                                                                                                                                                                                                                                                                                                                                                                                 |           |
| 9                                              | 3.01 | Has the taxon become naturalised (established viable populations) outside its native range?                                                                             | Yes                                                 | Baruš V. and Oliva O. 1995. Fauna of the Czech and Slovak Republics. Volume 28/2. Fishes - Osteichthyes. Academia, Praha. (in Czech with English summary). Welcomme, R.L., 1988. International introductions of inland aquatic species. FAO Fish.                                                                                                                               | Very high |
| 10                                             | 3.02 | In the taxon's introduced range, are there known adverse impacts to wild stocks or commercial taxa?                                                                     | Yes                                                 | Baruš V. and Oliva O. 1995. Fauna of the Czech and Slovak Republics. Volume 28/2. Fishes - Osteichthyes. Academia, Praha. (in Czech with English summary).                                                                                                                                                                                                                      | Very high |
| 11                                             | 3.03 | In the taxon's introduced range, are there known adverse impacts to aquaculture?                                                                                        | No                                                  | Baruš V. and Oliva O. 1995. Fauna of the Czech and Slovak Republics. Volume 28/2. Fishes - Osteichthyes. Academia, Praha. (in Czech with English summary).                                                                                                                                                                                                                      | Very high |
| 12                                             | 3.04 | In the taxon's introduced range, are there known adverse impacts to ecosystem services?                                                                                 | Yes                                                 | Baruš V. and Oliva O. 1995. Fauna of the Czech and Slovak Republics. Volume 28/2. Fishes - Osteichthyes. Academia, Praha. (in Czech with English summary).                                                                                                                                                                                                                      | Very high |
| 13                                             | 3.05 | In the taxon's introduced range, are there known adverse socio-economic impacts?                                                                                        | No                                                  | Species used in aquaculture, there is an impact on biodiversity but no recognized socio-economic impact for Great Lakes (Fuller et al. 2020).                                                                                                                                                                                                                                   | Medium    |
| B. Biology/Ecology                             |      |                                                                                                                                                                         |                                                     |                                                                                                                                                                                                                                                                                                                                                                                 |           |
| 4. Undesirable (or persistence) traits         |      |                                                                                                                                                                         |                                                     |                                                                                                                                                                                                                                                                                                                                                                                 |           |
| 14                                             | 4.01 | Is it likely that the taxon will be poisonous or pose other risks to human health?                                                                                      | No                                                  | Baruš V. and Oliva O. 1995. Fauna of the Czech and Slovak Republics. Volume 28/2. Fishes - Osteichthyes. Academia, Praha. (in Czech with English summary).                                                                                                                                                                                                                      | Very high |
| 15                                             | 4.02 | Is it likely that the taxon will smother one or more native taxa (that are not threatened or protected)?                                                                | Yes                                                 | Baruš V. and Oliva O. 1995. Fauna of the Czech and Slovak Republics. Volume 28/2. Fishes - Osteichthyes. Academia, Praha. (in Czech with English summary).                                                                                                                                                                                                                      | Very high |
| 16                                             | 4.03 | Are there any threatened or protected taxa that the non-native taxon would parasitise in the RA area?                                                                   | No                                                  | Baruš V. and Oliva O. 1995. Fauna of the Czech and Slovak Republics. Volume 28/2. Fishes - Osteichthyes. Academia, Praha. (in Czech with English summary).                                                                                                                                                                                                                      | Very high |
| 17                                             | 4.04 | Is the taxon adaptable in terms of climatic and other environmental conditions, thus enhancing its potential persistence if it has invaded or could invade the RA area? | No                                                  | Inhabits clear, cold waters. Not tolerating temperatures above 25 degrees Celcius and low oxygen levels (<5 mg/l) (Froese and Pauly 2019, CABI 2019).                                                                                                                                                                                                                           | Very high |
| 18                                             | 4.05 | Is the taxon likely to disrupt food-web structure/function in aquatic ecosystems if it has invaded or is likely to invade the RA                                        | No                                                  | No information on such impact.                                                                                                                                                                                                                                                                                                                                                  | High      |
| 19                                             | 4.06 | Is the taxon likely to exert adverse impacts on ecosystem services in the RA area?                                                                                      | No                                                  | It can be beneficial for angling and aquaculture, no other impacts regonized (Jonsson, B. (2011): NOBANIS – Invasive Alien Species Fact Sheet – Oncorhynchus mykiss. – From: Online Database of the European Network on Invasive Alien Species – NOBANIS www.nobanis.org, Date of access x/x/201x. )                                                                            | High      |
| 20                                             | 4.07 | Is it likely that the taxon will host, and/or act as a vector for, recognised pests and infectious agents that are endemic in the RA area?                              | Yes                                                 | Host to parasites (Stanković et al. 2015; Fuller, P., J. Larson, A. Fusaro, T.H. Makled, and M. Neilson, 2020, Oncorhynchus mykiss (Walbaum, 1792): U.S. Geological Survey, Nonindigenous Aquatic Species Database, Gainesville, FL, https://nas.er.usgs.gov/queries/factsheet.aspx?SpeciesID=910, Revision Date: 9/12/2019, Peer Review Date: 4/1/2016, Access Date: 2/11/2020 | Very high |

|                                 |      |                                                                                                                                                                                           |                |                                                                                                                                                                                                                                                                                                                                                                                                                                                                    |           |
|---------------------------------|------|-------------------------------------------------------------------------------------------------------------------------------------------------------------------------------------------|----------------|--------------------------------------------------------------------------------------------------------------------------------------------------------------------------------------------------------------------------------------------------------------------------------------------------------------------------------------------------------------------------------------------------------------------------------------------------------------------|-----------|
| 21                              | 4.08 | Is it likely that the taxon will host, and/or act as a vector for, recognised pests and infectious agents that are absent from (novel to) the RA area?                                    | Yes            | Host to parasites (Stanković et al. 2015; Fuller, P., J. Larson, A. Fusaro, T.H. Makled, and M. Neilson, 2020, <i>Oncorhynchus mykiss</i> (Walbaum, 1792): U.S. Geological Survey, Nonindigenous Aquatic Species Database, Gainesville, FL, <a href="https://nas.er.usgs.gov/queries/factsheet.aspx?SpeciesID=910">https://nas.er.usgs.gov/queries/factsheet.aspx?SpeciesID=910</a> , Revision Date: 9/12/2019, Peer Review Date: 4/1/2016, Access Date: 2/11/2020 | Very high |
| 22                              | 4.09 | Is it likely that the taxon will achieve a body size that will make it more likely to be released from captivity?                                                                         | Yes            | Baruš V. and Oliva O. 1995. Fauna of the Czech and Slovak Republics. Volume 28/2. Fishes - Osteichthyes. Academia, Praha. (in Czech with English summary).                                                                                                                                                                                                                                                                                                         | Very high |
| 23                              | 4.10 | Is the taxon capable of sustaining itself in a range of water velocity conditions (e.g. versatile in habitat use)?                                                                        | Yes            | Baruš V. and Oliva O. 1995. Fauna of the Czech and Slovak Republics. Volume 28/2. Fishes - Osteichthyes. Academia, Praha. (in Czech with English summary).                                                                                                                                                                                                                                                                                                         | Very high |
| 24                              | 4.11 | Is it likely that the taxon's mode of existence (e.g. excretion of by-products) or behaviours (e.g. feeding) will reduce habitat quality for native taxa?                                 | Yes            | The presence of live salmonids may have an even greater effect on nutrients in streams through the excretion of ammonium and soluble reactive phosphorus and their mechanical disturbance of the stream bottom during spawning runs (Ivan et al. 2011, Tiegs                                                                                                                                                                                                       | Medium    |
| 25                              | 4.12 | Is the taxon likely to maintain a viable population even when present in low densities (or persisting in adverse conditions by way of a dormant form)?                                    | No             | Baruš V. and Oliva O. 1995. Fauna of the Czech and Slovak Republics. Volume 28/2. Fishes - Osteichthyes. Academia, Praha. (in Czech with English summary).                                                                                                                                                                                                                                                                                                         | High      |
| <b>5. Resource exploitation</b> |      |                                                                                                                                                                                           |                |                                                                                                                                                                                                                                                                                                                                                                                                                                                                    |           |
| 26                              | 5.01 | Is the taxon likely to consume threatened or protected native taxa in the RA area?                                                                                                        | Yes            | Anglers occasionally report the presence of olm remains in the gut of caught rainbow trout (Stanković et al. 2015).                                                                                                                                                                                                                                                                                                                                                | Very high |
| 27                              | 5.02 | Is the taxon likely to sequester food resources (including nutrients) to the detriment of native taxa in the RA area?                                                                     | Not applicable | No sufficient information to calculate.                                                                                                                                                                                                                                                                                                                                                                                                                            | Very high |
| <b>6. Reproduction</b>          |      |                                                                                                                                                                                           |                |                                                                                                                                                                                                                                                                                                                                                                                                                                                                    |           |
| 28                              | 6.01 | Is the taxon likely to exhibit parental care and/or to reduce age-at-maturity in response to environmental conditions?                                                                    | No             | Kottelat & Freyhof 2007                                                                                                                                                                                                                                                                                                                                                                                                                                            | Very high |
| 29                              | 6.02 | Is the taxon likely to produce viable gametes or propagules (in the RA area)?                                                                                                             | Yes            | Stanković et al. 2015                                                                                                                                                                                                                                                                                                                                                                                                                                              | High      |
| 30                              | 6.03 | Is the taxon likely to hybridise naturally with native taxa?                                                                                                                              | No             | Stanković et al. 2015                                                                                                                                                                                                                                                                                                                                                                                                                                              | Very high |
| 31                              | 6.04 | Is the taxon likely to be hermaphroditic or to display asexual reproduction?                                                                                                              | No             | Kottelat & Freyhof 2007                                                                                                                                                                                                                                                                                                                                                                                                                                            | Very high |
| 32                              | 6.05 | Is the taxon dependent on the presence of another taxon (or specific habitat features) to complete its life cycle?                                                                        | Yes            | Reported not to establish breeding populations if the peak emergence of fry corresponds to flood season and cold summer temperatures and if temperature does not fall below 13°C (Kottelat & Freyhof 2007).                                                                                                                                                                                                                                                        | Very high |
| 33                              | 6.06 | Is the taxon known (or likely) to produce a large number of propagules or offspring within a short time span (e.g. < 1 year)?                                                             | Yes            | Fecundity up to over 12000 eggs per female (Froese & Pauly 2019).                                                                                                                                                                                                                                                                                                                                                                                                  | Very high |
| 34                              | 6.07 | How many time units (days, months, years) does the taxon require to reach the age-at-first-reproduction?                                                                                  | 2              | Froese & Pauly 2019                                                                                                                                                                                                                                                                                                                                                                                                                                                | Very high |
| <b>7. Dispersal mechanisms</b>  |      |                                                                                                                                                                                           |                |                                                                                                                                                                                                                                                                                                                                                                                                                                                                    |           |
| 35                              | 7.01 | How many potential internal vectors/pathways could the taxon use to disperse within the RA area (with suitable)                                                                           | >1             | Restocking, escapes from farms, illegal introductions                                                                                                                                                                                                                                                                                                                                                                                                              | High      |
| 36                              | 7.02 | Will any of these vectors/pathways bring the taxon in close proximity to one or more protected areas (e.g. MCZ, MPA, SSSI)?                                                               | No             | No restocking of protected areas with alien species, natural dispersion most unlikely because of the ecological demands of species.                                                                                                                                                                                                                                                                                                                                | Low       |
| 37                              | 7.03 | Does the taxon have a means of actively attaching itself to hard substrata (e.g. ship hulls, pilings, buoys) such that it enhances the likelihood of dispersal?                           | No             | No adaptations (personal opinion)                                                                                                                                                                                                                                                                                                                                                                                                                                  | Very high |
| 38                              | 7.04 | Is natural dispersal of the taxon likely to occur as eggs (for animals) or as propagules (for plants: seeds, spores) in the RA area?                                                      | No             | Eggs covered in gravel pit (Froese & Pauly 2019).                                                                                                                                                                                                                                                                                                                                                                                                                  | High      |
| 39                              | 7.05 | Is natural dispersal of the taxon likely to occur as larvae/juveniles (for animals) or as fragments/seedlings (for plants) in the RA area?                                                | Yes            | Young fish move downstream at night, shortly after emergence (Froese & Pauly 2019).                                                                                                                                                                                                                                                                                                                                                                                | Very high |
| 40                              | 7.06 | Are older life stages of the taxon likely to migrate in the RA area for reproduction?                                                                                                     | Yes            | Mature individuals undertake short spawning migrations. Anadromous and lake forms may migrate long distances to spawning streams (Froese & Pauly 2019).                                                                                                                                                                                                                                                                                                            | Very high |
| 41                              | 7.07 | Are propagules or eggs of the taxon likely to be dispersed in the RA area by other animals?                                                                                               | No             | No, eggs covered with gravel (Froese and Pauly 2019).                                                                                                                                                                                                                                                                                                                                                                                                              | Very high |
| 42                              | 7.08 | Is dispersal of the taxon along any of the vectors/pathways mentioned in the previous seven questions (35–41; i.e. both unintentional or intentional) likely to be                        | Yes            | Stocking.                                                                                                                                                                                                                                                                                                                                                                                                                                                          | Very high |
| 43                              | 7.09 | Is dispersal of the taxon density dependent?                                                                                                                                              | No             | Personal opinion                                                                                                                                                                                                                                                                                                                                                                                                                                                   | Low       |
| <b>8. Tolerance attributes</b>  |      |                                                                                                                                                                                           |                |                                                                                                                                                                                                                                                                                                                                                                                                                                                                    |           |
| 44                              | 8.01 | Is the taxon able to withstand being out of water for extended periods (e.g. minimum of one or more hours) at some stage of its life cycle?                                               | No             | Baruš V. and Oliva O. 1995. Fauna of the Czech and Slovak Republics. Volume 28/2. Fishes - Osteichthyes. Academia, Praha. (in Czech with English summary).                                                                                                                                                                                                                                                                                                         | Very high |
| 45                              | 8.02 | Is the taxon tolerant of a wide range of water quality conditions relevant to that taxon? [In the Justification field, indicate the relevant water quality variable(s) being considered.] | Yes            | The rainbow trout is a hardy fish that is easy to spawn, fast growing, tolerant to a wide range of environments and handling (FAO). Rainbow trout is more temperature tolerant than native Salmonid species (Matulla et al. 2007). Better tolerance to temperature, oxygen levels and pH than other salmonids in                                                                                                                                                   | Medium    |
| 46                              | 8.03 | Can the taxon be controlled or eradicated in the wild with chemical, biological, or other agents/means?                                                                                   | No             | Not allowed                                                                                                                                                                                                                                                                                                                                                                                                                                                        | Very high |
| 47                              | 8.04 | Is the taxon likely to tolerate or benefit from environmental/human disturbance?                                                                                                          | Yes            | Only one example found that the species tolerates deforestation (Lacy et al. 2018).                                                                                                                                                                                                                                                                                                                                                                                | High      |

|                          |      |                                                                                                                                                              |                |                                                                                                                                                     |           |
|--------------------------|------|--------------------------------------------------------------------------------------------------------------------------------------------------------------|----------------|-----------------------------------------------------------------------------------------------------------------------------------------------------|-----------|
| 48                       | 8.05 | Is the taxon able to tolerate salinity levels that are higher or lower than those found in its usual environment?                                            | Yes            | Froese & Pauly 2019                                                                                                                                 | High      |
| 49                       | 8.06 | Are there effective natural enemies (predators) of the taxon present in the RA                                                                               | Yes            | Piscivorous birds and otters (personal opinion).                                                                                                    | High      |
| <b>C. Climate change</b> |      |                                                                                                                                                              |                |                                                                                                                                                     |           |
| <b>9. Climate change</b> |      |                                                                                                                                                              |                |                                                                                                                                                     |           |
| 50                       | 9.01 | Under the predicted future climatic conditions, are the risks of entry into the RA area posed by the taxon likely to increase, decrease or not change?       | Not applicable | Already present (Froese, R. and D. Pauly. Editors. 2021.FishBase. World Wide Web electronic publication. www.fishbase.org, (02/2021 )).             | Very high |
| 51                       | 9.02 | Under the predicted future climatic conditions, are the risks of establishment posed by the taxon likely to increase, decrease or not change?                | No change      | Climate change will not dramatically alter the status of rainbow trout (predicted for USA) (Isaak et al. 2010).                                     | Medium    |
| 52                       | 9.03 | Under the predicted future climatic conditions, are the risks of dispersal within the RA area posed by the taxon likely to increase, decrease or not change? | No change      | Climate change will not dramatically alter the status of rainbow trout (predicted for USA) (Isaak et al. 2010).                                     | Medium    |
| 53                       | 9.04 | Under the predicted future climatic conditions, what is the likely magnitude of future potential impacts on biodiversity and/or ecological integrity/status? | Higher         | Native salmonids may be at risk of losing habitat in favour of invaders like more tolerant rainbow trout (Matulla et al. 2007).                     | High      |
| 54                       | 9.05 | Under the predicted future climatic conditions, what is the likely magnitude of future potential impacts on ecosystem structure and/or function?             | Higher         | Species may possibly limit upward shifts of native Salmonids, brown trout and grayling, reducing their numbers which may have effects on ecosystem. | Medium    |
| 55                       | 9.06 | Under the predicted future climatic conditions, what is the likely magnitude of future potential impacts on ecosystem services/socio-economic factors?       | Higher         | Reduced numbers of grayling and brown trout may have adverse influence on salmonid sport fishing and loss in economic value (Matulla et al. 2007).  | High      |

| Statistics                                     |             |
|------------------------------------------------|-------------|
| Scores                                         |             |
| <b>BRA</b>                                     | <b>26.0</b> |
| <b>BRA Outcome</b>                             | <b>-</b>    |
| <b>BRA+CCA</b>                                 | <b>32.0</b> |
| <b>BRA+CCA Outcome</b>                         | <b>-</b>    |
| Score partition                                |             |
| <b>A. Biogeography/Historical</b>              | <b>11.0</b> |
| 1. Domestication/Cultivation                   | 0.0         |
| 2. Climate, distribution and introduction risk | 1.0         |
| 3. Invasive elsewhere                          | 10.0        |
| <b>B. Biology/Ecology</b>                      | <b>15.0</b> |
| 4. Undesirable (or persistence) traits         | 5.0         |
| 5. Resource exploitation                       | 5.0         |
| 6. Reproduction                                | -1.0        |
| 7. Dispersal mechanisms                        | 1.0         |
| 8. Tolerance attributes                        | 5.0         |
| <b>C. Climate change</b>                       | <b>6.0</b>  |
| 9. Climate change                              | 6.0         |
| Answered Questions                             |             |
| <b>Total</b>                                   | <b>55</b>   |
| <b>A. Biogeography/Historical</b>              | <b>13</b>   |
| 1. Domestication/Cultivation                   | 3           |
| 2. Climate, distribution and introduction risk | 5           |
| 3. Invasive elsewhere                          | 5           |
| <b>B. Biology/Ecology</b>                      | <b>36</b>   |
| 4. Undesirable (or persistence) traits         | 12          |
| 5. Resource exploitation                       | 2           |
| 6. Reproduction                                | 7           |
| 7. Dispersal mechanisms                        | 9           |
| 8. Tolerance attributes                        | 6           |
| <b>C. Climate change</b>                       | <b>6</b>    |
| 9. Climate change                              | 6           |
| Sectors affected                               |             |
| <b>Commercial</b>                              | <b>10</b>   |
| <b>Environmental</b>                           | <b>14</b>   |
| <b>Species or population nuisance traits</b>   | <b>11</b>   |

| Thresholds     |             |
|----------------|-------------|
| <b>BRA</b>     | <b>-</b>    |
| <b>BRA+CCA</b> | <b>-</b>    |
| Confidence     |             |
| <b>BRA+CCA</b> | <b>0.85</b> |
| <b>BRA</b>     | <b>0.87</b> |
| <b>CCA</b>     | <b>0.67</b> |

| Date and Time              |
|----------------------------|
| <b>13/05/2021 20:49:49</b> |



AS-ISK v2

| Taxon and Assessor details         |                                         |
|------------------------------------|-----------------------------------------|
| Category                           | Fishes and Lampreys (freshwater)        |
| Taxon name                         | <i>Oncorhynchus mykiss</i>              |
| Common name                        | rainbow trout                           |
| Assessor                           | Tamara Kanjuh                           |
| Risk screening context             |                                         |
| Reason and socio-economic benefits |                                         |
| Risk assessment area               | Danube & Adriatic basins BA, HR, ME, RS |
| Taxonomy                           |                                         |
| Native range                       |                                         |
| Introduced range                   |                                         |
| URL                                |                                         |

|                                                |      |                                                                                                                                                                         | Response | Justification (references and/or other information)                                                                                                                                                                                                                                                                                                                                                                                                                                                                                                                                          | Confidence |
|------------------------------------------------|------|-------------------------------------------------------------------------------------------------------------------------------------------------------------------------|----------|----------------------------------------------------------------------------------------------------------------------------------------------------------------------------------------------------------------------------------------------------------------------------------------------------------------------------------------------------------------------------------------------------------------------------------------------------------------------------------------------------------------------------------------------------------------------------------------------|------------|
| A. Biogeography/Historical                     |      |                                                                                                                                                                         |          |                                                                                                                                                                                                                                                                                                                                                                                                                                                                                                                                                                                              |            |
| 1. Domestication/Cultivation                   |      |                                                                                                                                                                         |          |                                                                                                                                                                                                                                                                                                                                                                                                                                                                                                                                                                                              |            |
| 1                                              | 1.01 | Has the taxon been the subject of domestication (or cultivation) for at least 20 generations?                                                                           | Yes      | Rainbow trout have been cultured for hundred of years, and are the most widely farmed trout in the world (Hardy, 2002).                                                                                                                                                                                                                                                                                                                                                                                                                                                                      | Very high  |
| 2                                              | 1.02 | Is the taxon harvested in the wild and likely to be sold or used in its live form?                                                                                      | Yes      | The rainbow trout has long been used for fish farming (Hardy, 2002).                                                                                                                                                                                                                                                                                                                                                                                                                                                                                                                         | Very high  |
| 3                                              | 1.03 | Does the taxon have invasive races, varieties, sub-taxa or congeners?                                                                                                   | Yes      | Robert J. Behnke (2002) listed 15 subspecies of rainbow trout.                                                                                                                                                                                                                                                                                                                                                                                                                                                                                                                               | Very high  |
| 2. Climate, distribution and introduction risk |      |                                                                                                                                                                         |          |                                                                                                                                                                                                                                                                                                                                                                                                                                                                                                                                                                                              |            |
| 4                                              | 2.01 | How similar are the climatic conditions of the Risk Assessment (RA) area and the taxon's native range?                                                                  | High     | Dfa, Dfb (Köppen–Geiger climate classification system)                                                                                                                                                                                                                                                                                                                                                                                                                                                                                                                                       | Medium     |
| 5                                              | 2.02 | What is the quality of the climate matching data?                                                                                                                       | High     | Köppen–Geiger climate classification system                                                                                                                                                                                                                                                                                                                                                                                                                                                                                                                                                  | Medium     |
| 6                                              | 2.03 | Is the taxon already present outside of captivity in the RA area?                                                                                                       | Yes      | The occurrence of a resident form of rainbow trout in the Danube is rare but pretty regular, especially in the proximity of Djerdap dam I and II (Nikčević, et al., 2016).                                                                                                                                                                                                                                                                                                                                                                                                                   | Very high  |
| 7                                              | 2.04 | How many potential vectors could the taxon use to enter in the RA area?                                                                                                 | >1       | Aquaculture, hunting, angling, sport fishing (Lemhardt et al., 2011).                                                                                                                                                                                                                                                                                                                                                                                                                                                                                                                        | Very high  |
| 8                                              | 2.05 | Is the taxon currently found in close proximity to, and likely to enter into, the RA area in the near future (e.g. unintentional and intentional introductions)?        | No       | There is no established population of rainbow trout in Serbian natural waters, its populations being associated with escapes from fish farms.                                                                                                                                                                                                                                                                                                                                                                                                                                                | High       |
| 3. Invasive elsewhere                          |      |                                                                                                                                                                         |          |                                                                                                                                                                                                                                                                                                                                                                                                                                                                                                                                                                                              |            |
| 9                                              | 3.01 | Has the taxon become naturalised (established viable populations) outside its native range?                                                                             | Yes      | The highest abundance of suchpopulations was observed in the Alpine foothills of central Europe where naturalization is notlimited to modified waters less suitable for native salmonids but also occurs commonly inpristine and near-natural waters (Stanković et al., 2012b).                                                                                                                                                                                                                                                                                                              | Very high  |
| 10                                             | 3.02 | In the taxon's introduced range, are there known adverse impacts to wild stocks or commercial taxa?                                                                     | Yes      | Native rainbow trout and other congeneric trout can suffer significant loss of genetic diversity and integrity due to hybridization with introduced hatchery populations (Pearse et al., 2010; Simmons et al., 2010; Finger et al., 2011).Rainbow trout can have a severe negative impact on other salmonid species through redd superimposition and competition for space and food (Scott&Irvine, 2000; Seiler and Keeley, 2009; Van Zwol et al., 2012b). Non-native rainbow trout can also affect congeneric trout species by predation or competition, or both (Stanković et al., 2012b). | Very high  |
| 11                                             | 3.03 | In the taxon's introduced range, are there known adverse impacts to aquaculture?                                                                                        | Yes      | Rainbow trout have been introduced throughout the world, negatively impacting species of native freshwater fishes and, therefore, native fisheries (https://animaldiversity.org/accounts/Oncorhynchus_mykiss/).                                                                                                                                                                                                                                                                                                                                                                              | Medium     |
| 12                                             | 3.04 | In the taxon's introduced range, are there known adverse impacts to ecosystem services?                                                                                 | Yes      | Rainbow trout have been introduced throughout the world, negatively impacting species of native freshwater fishes and, therefore, native fisheries (https://animaldiversity.org/accounts/Oncorhynchus_mykiss/).                                                                                                                                                                                                                                                                                                                                                                              | Medium     |
| 13                                             | 3.05 | In the taxon's introduced range, are there known adverse socio-economic impacts?                                                                                        | Yes      | Rainbow trout have been introduced throughout the world, negatively impacting species of native freshwater fishes and, therefore, native fisheries (https://animaldiversity.org/accounts/Oncorhynchus_mykiss/).                                                                                                                                                                                                                                                                                                                                                                              | Medium     |
| B. Biology/Ecology                             |      |                                                                                                                                                                         |          |                                                                                                                                                                                                                                                                                                                                                                                                                                                                                                                                                                                              |            |
| 4. Undesirable (or persistence) traits         |      |                                                                                                                                                                         |          |                                                                                                                                                                                                                                                                                                                                                                                                                                                                                                                                                                                              |            |
| 14                                             | 4.01 | Is it likely that the taxon will be poisonous or pose other risks to human health?                                                                                      | Yes      | Potential pests (fishbase.se)                                                                                                                                                                                                                                                                                                                                                                                                                                                                                                                                                                | Medium     |
| 15                                             | 4.02 | Is it likely that the taxon will smother one or more native taxa (that are not threatened or protected)?                                                                | Yes      | Alongside hybridization, competition has been implicated in the extinction of the Alvord cutthroat trout (O. c. alvordensis) and in having a severe negative impact on several other cutthroat trout subspecies (Allendorf and Leary, 1988; Seiler and Keeley, 2009).                                                                                                                                                                                                                                                                                                                        | Very high  |
| 16                                             | 4.03 | Are there any threatened or protected taxa that the non-native taxon would parasitise in the RA area?                                                                   | Yes      | Introduction of salmonids into karstic waters of Adriatic Croatia represents a special problem as these waters host various endemic minnow-like fish, which are in danger of local and even total extinction due to predation by rainbow trout (Stanković et al., 1998).                                                                                                                                                                                                                                                                                                                     | Very high  |
| 17                                             | 4.04 | Is the taxon adaptable in terms of climatic and other environmental conditions, thus enhancing its potential persistence if it has invaded or could invade the RA area? | Yes      | Forexample,O.mykisscan survive in waters between approximately 0.0 °C and 29.8 °C ,depending on the temperature history and strain of the fish being tested (Rodgers&Griffiths, 1983; Currie et al., 1998) and the rate of temperature change (Elliott&Elliott, 1995). However, within this temperature range for survival, or for any other variable,O.mykisshave a preferred range in which growth, reproduction and/or other physiologicalcharacteristics are optimised (Peterson&Meador, 1994).                                                                                          | Medium     |

|                                 |      |                                                                                                                                                           |     |                                                                                                                                                                                                                                                                                                                                                                                                                                                                                                                                                                                                                                                              |           |
|---------------------------------|------|-----------------------------------------------------------------------------------------------------------------------------------------------------------|-----|--------------------------------------------------------------------------------------------------------------------------------------------------------------------------------------------------------------------------------------------------------------------------------------------------------------------------------------------------------------------------------------------------------------------------------------------------------------------------------------------------------------------------------------------------------------------------------------------------------------------------------------------------------------|-----------|
| 18                              | 4.05 | Is the taxon likely to disrupt food-web structure/function in aquatic ecosystems if it has invaded or is likely to invade the RA area?                    | Yes | Reduction of rainbow trout densities led to compensatory responses in other components of the Castle Lake fish assemblage as brook trout and golden shiners increased in abundance. This compensation resulted in increased rates of vertebrate planktivory on daphnids within 2 yr after trout stocking was discontinued. Zooplankton shifts in response to discontinuance of trout stocking were more rapid, particularly an immediate increase in a previously rare invertebrate predator ( <i>Diatylosomella thomasi</i> ) (Elsner 1999).                                                                                                                | High      |
| 19                              | 4.06 | Is the taxon likely to exert adverse impacts on ecosystem services in the RA area?                                                                        | No  | Recreational fishing is a multifaceted activity with complex benefits for individuals and society (Liu et al., 2019).                                                                                                                                                                                                                                                                                                                                                                                                                                                                                                                                        | Medium    |
| 20                              | 4.07 | Is it likely that the taxon will host, and/or act as a vector for, recognised pests and infectious agents that are endemic in the RA area?                | No  | No information found.                                                                                                                                                                                                                                                                                                                                                                                                                                                                                                                                                                                                                                        | Low       |
| 21                              | 4.08 | Is it likely that the taxon will host, and/or act as a vector for, recognised pests and infectious agents that are absent from (novel to) the RA area?    | No  | No information found.                                                                                                                                                                                                                                                                                                                                                                                                                                                                                                                                                                                                                                        | Low       |
| 22                              | 4.09 | Is it likely that the taxon will achieve a body size that will make it more likely to be released from captivity?                                         | No  | No information found.                                                                                                                                                                                                                                                                                                                                                                                                                                                                                                                                                                                                                                        | Low       |
| 23                              | 4.10 | Is the taxon capable of sustaining itself in a range of water velocity conditions (e.g. versatile in habitat use)?                                        | Yes | The study showed that the highest trout densities were found in the fastest flowing waters (based on volume throughput estimates of individual streams). The highest trout densities were recorded in water velocities of 45.6 – 76.0 cm*sec <sup>-1</sup> . However, trout have also been recorded in high abundance in water speeds exceeding 156-321 cm*sec <sup>-1</sup> (Varley&Gresswell, 1988).                                                                                                                                                                                                                                                       | Very high |
| 24                              | 4.11 | Is it likely that the taxon's mode of existence (e.g. excretion of by-products) or behaviours (e.g. feeding) will reduce habitat quality for native taxa? | Yes | Rainbow trout can have a severe negative impact on other salmonid species through redd superimposition and competition for space and food (Scott&Irvine, 2000; Seiler&Keeley, 2009; Van Zwol et al., 2012b).                                                                                                                                                                                                                                                                                                                                                                                                                                                 | High      |
| 25                              | 4.12 | Is the taxon likely to maintain a viable population even when present in low densities (or persisting in adverse conditions by way of a dormant form)?    | Yes | The evidence for stronger dominance hierarchies in the 10 kg m <sup>-3</sup> treatment, indicate that low as well as high stocking densities have the potential to adversely affect trout welfare (North et al., 2006).                                                                                                                                                                                                                                                                                                                                                                                                                                      | Low       |
| <b>5. Resource exploitation</b> |      |                                                                                                                                                           |     |                                                                                                                                                                                                                                                                                                                                                                                                                                                                                                                                                                                                                                                              |           |
| 26                              | 5.01 | Is the taxon likely to consume threatened or protected native taxa in the RA area?                                                                        | Yes | Introduction of salmonids into karstic waters of Adriatic Croatia represents a special problem as these waters host various endemic minnow-like fish, which are in danger of local and even total extinction due to predation by rainbow trout. This has already happened with the striped minnow ( <i>Telestes metohiensis</i> ) in the River Ljuta (Zupančič&Bogutskaya, 2002; Zupančič, 2008).                                                                                                                                                                                                                                                            | Very high |
| 27                              | 5.02 | Is the taxon likely to sequester food resources (including nutrients) to the detriment of native taxa in the RA area?                                     | No  | No information found.                                                                                                                                                                                                                                                                                                                                                                                                                                                                                                                                                                                                                                        | Low       |
| <b>6. Reproduction</b>          |      |                                                                                                                                                           |     |                                                                                                                                                                                                                                                                                                                                                                                                                                                                                                                                                                                                                                                              |           |
| 28                              | 6.01 | Is the taxon likely to exhibit parental care and/or to reduce age-at-maturity in response to environmental conditions?                                    | No  | There is no parental care of the nest or the eggs (Rainbow Trout - Lake Superior Streams, <a href="https://www.lakesuperiorstreams.org">https://www.lakesuperiorstreams.org</a> ).                                                                                                                                                                                                                                                                                                                                                                                                                                                                           | Medium    |
| 29                              | 6.02 | Is the taxon likely to produce viable gametes or propagules (in the RA area)?                                                                             | Yes | Recent records on naturalized rainbow trout populations in Croatia are rare. MacCrimmon (1971) reported self-sustaining rainbow trout populations from the disappearing river systems of Gacka and Dretulja and in Plitvice Lakes, all in Lika County. Recently, a self-sustaining population was observed in the karstic disappearing river system Ljuta near Dubrovnik (Zupančič&Bogutskaya, 2002; Zupančič, 2008; unpublished personal observations), in River Jadro and Žrnovnica near Split, and in an artificial canal of the Drava near Prolog (Nikica Šprem, personal communication: unpublished personal observations).                             | Very high |
| 30                              | 6.03 | Is the taxon likely to hybridise naturally with native taxa?                                                                                              | Yes | Native rainbow trout and other congeneric trout can suffer significant loss of genetic diversity and integrity due to hybridization with introduced hatchery populations (Pearse et al., 2010; Simmons et al., 2010; Finger et al., 2011). Such accounts are reported throughout the entire range of North American native trout. Hybridization has especially affected the inland resident redband trout of the Columbia, Sacramento and northern Great basins, the subspecies of the Kern River basin, Gila trout ( <i>Oncorhynchus gilae gilae</i> ) from Arizona and Apache trout ( <i>O. g. apache</i> ) from New Mexico, along with many subspecies of | Very high |
| 31                              | 6.04 | Is the taxon likely to be hermaphroditic or to display asexual reproduction?                                                                              | No  | No information found.                                                                                                                                                                                                                                                                                                                                                                                                                                                                                                                                                                                                                                        | Medium    |
| 32                              | 6.05 | Is the taxon dependent on the presence of another taxon (or specific habitat features) to complete its life cycle?                                        | Yes | Cover, defined as sheltered areas in a stream where trout can rest or hide from predators (i.e. snags, logs, undercut banks, large rocks, etc), was positively correlated with trout abundance. The best trout areas had in excess of 55% of the available area of the stream containing some form of cover. The most inadequate streams still had cover, but less than 10% of the area of a stream                                                                                                                                                                                                                                                          | High      |
| 33                              | 6.06 | Is the taxon known (or likely) to produce a large number of propagules or offspring within a short time span (e.g. < 1 year)?                             | Yes | Female rainbow trout usually produce 2000 to 3000 4-to-5-millimetre eggs per kilogram of weight (Tyler et al., 1996). Range number of offspring 200 to 8000 ( <a href="https://animaldiversity.org/accounts/Oncorhynchus_mykiss/">https://animaldiversity.org/accounts/Oncorhynchus_mykiss/</a> ).                                                                                                                                                                                                                                                                                                                                                           | Medium    |
| 34                              | 6.07 | How many time units (days, months, years) does the taxon require to reach the age-at-first-reproduction?                                                  | 3   | As a result, temperature and food availability influence growth and maturation, causing age at maturity to vary; though it is usually 3-4 years (fao.org).                                                                                                                                                                                                                                                                                                                                                                                                                                                                                                   | High      |
| <b>7. Dispersal mechanisms</b>  |      |                                                                                                                                                           |     |                                                                                                                                                                                                                                                                                                                                                                                                                                                                                                                                                                                                                                                              |           |
| 35                              | 7.01 | How many potential internal vectors/pathways could the taxon use to disperse within the RA area (with suitable vectors/pathways)?                         | >1  | Aquaculture, stocking for sport fisheries (Lenhardt et al., 2010).                                                                                                                                                                                                                                                                                                                                                                                                                                                                                                                                                                                           | High      |
| 36                              | 7.02 | Will any of these vectors/pathways bring the taxon in close proximity to one or more protected areas (e.g. MCZ, MPA, SSSI)?                               | Yes | Through water connections.                                                                                                                                                                                                                                                                                                                                                                                                                                                                                                                                                                                                                                   | Medium    |

|                                |      |                                                                                                                                                                                           |          |                                                                                                                                                                                                                                                                                                                                                                                                                                                                                                                                                                                                                                                                                                       |        |
|--------------------------------|------|-------------------------------------------------------------------------------------------------------------------------------------------------------------------------------------------|----------|-------------------------------------------------------------------------------------------------------------------------------------------------------------------------------------------------------------------------------------------------------------------------------------------------------------------------------------------------------------------------------------------------------------------------------------------------------------------------------------------------------------------------------------------------------------------------------------------------------------------------------------------------------------------------------------------------------|--------|
| 37                             | 7.03 | Does the taxon have a means of actively attaching itself to hard substrata (e.g. ship hulls, pilings, buoys) such that it enhances the likelihood of dispersal?                           | No       | No information found.                                                                                                                                                                                                                                                                                                                                                                                                                                                                                                                                                                                                                                                                                 | Low    |
| 38                             | 7.04 | Is natural dispersal of the taxon likely to occur as eggs (for animals) or as propagules (for plants: seeds, spores) in the RA area?                                                      | No       | No information found.                                                                                                                                                                                                                                                                                                                                                                                                                                                                                                                                                                                                                                                                                 | Medium |
| 39                             | 7.05 | Is natural dispersal of the taxon likely to occur as larvae/juveniles (for animals) or as fragments/seedlings (for plants) in the RA area?                                                | Yes      | Other than these established populations, adults have been frequently captured during many years in streams all along the estuary. Given that no reproduction has been detected in these rivers, captures are believed to be composed of vagrant fish                                                                                                                                                                                                                                                                                                                                                                                                                                                 | Medium |
| 40                             | 7.06 | Are older life stages of the taxon likely to migrate in the RA area for reproduction?                                                                                                     | Yes      | Rainbow trout populations in Lake Constance should receive special attention as they exhibit migratory behavior. Individuals leave the lake and migrate upstream for spawning where, presumably, they compete with brown trout for spawning grounds (Peter, 1997; Dußling&Berg, 2001).                                                                                                                                                                                                                                                                                                                                                                                                                | Medium |
| 41                             | 7.07 | Are propagules or eggs of the taxon likely to be dispersed in the RA area by other animals?                                                                                               | No       | No information found.                                                                                                                                                                                                                                                                                                                                                                                                                                                                                                                                                                                                                                                                                 | Low    |
| 42                             | 7.08 | Is dispersal of the taxon along any of the vectors/pathways mentioned in the previous seven questions (35–41; i.e. both unintentional or intentional) likely to be                        | Yes      | Expansion for sport fishing.                                                                                                                                                                                                                                                                                                                                                                                                                                                                                                                                                                                                                                                                          | Medium |
| 43                             | 7.09 | Is dispersal of the taxon density dependent?                                                                                                                                              | Yes      | The evidence for stronger dominance hierarchies in the 10 kg m <sup>-3</sup> treatment, indicate that low as well as high stocking densities have the potential to adversely affect trout welfare                                                                                                                                                                                                                                                                                                                                                                                                                                                                                                     | Medium |
| <b>8. Tolerance attributes</b> |      |                                                                                                                                                                                           |          |                                                                                                                                                                                                                                                                                                                                                                                                                                                                                                                                                                                                                                                                                                       |        |
| 44                             | 8.01 | Is the taxon able to withstand being out of water for extended periods (e.g. minimum of one or more hours) at some stage of its life cycle?                                               | No       | It cannot survive out of the water.                                                                                                                                                                                                                                                                                                                                                                                                                                                                                                                                                                                                                                                                   | High   |
| 45                             | 8.02 | Is the taxon tolerant of a wide range of water quality conditions relevant to that taxon? [In the Justification field, indicate the relevant water quality variable(s) being considered.] | No       | Oxygen concentration has been identified as the critical factor for the survival of O.mykiss from spawning to hatching (Rubin 1998). Although O.mykiss have been recorded in a range of dissolved oxygen levels (2.6 - 8.6 mg.L <sup>-1</sup> (Thurston et al., 1981), <1.0 - 5.0 mg.L <sup>-1</sup> (Matthews&Berg 1997)), sub-lethal effects have been recorded in O.mykiss and other salmonids at moderate levels of dissolved oxygen. For example, the distribution of adult O.mykiss was observed to be restricted to areas where dissolved oxygen concentrations were above 2.5 mg.L <sup>-1</sup> (Rowe&Chisnall 1995).                                                                        | High   |
| 46                             | 8.03 | Can the taxon be controlled or eradicated in the wild with chemical, biological, or other agents/means?                                                                                   | Yes      | Although some areas still intentionally stock rainbow trout, other areas are attempting to cut down on rainbow trout numbers. There are two main methods to remove the fish: fish traps and electro-fishing. Electro-fishing only stuns the fish, so it has the added benefit of allowing scientists to monitor populations of other fish while also removing rainbow trout. These methods are currently employed by rangers at the Grand Canyon National Park, where they're attempting to remove non-native trout to help the recovery of the native humpback chub ( <a href="http://www.invasivespeciesinitiative.com/rainbow-trout">http://www.invasivespeciesinitiative.com/rainbow-trout</a> ). | High   |
| 47                             | 8.04 | Is the taxon likely to tolerate or benefit from environmental/human disturbance?                                                                                                          | No       | No information found.                                                                                                                                                                                                                                                                                                                                                                                                                                                                                                                                                                                                                                                                                 | Low    |
| 48                             | 8.05 | Is the taxon able to tolerate salinity levels that are higher or lower than those found in its usual environment?                                                                         | Yes      | In terms of a tolerance range to salinity, both O.mykiss and S.trutta appear to be able to cope with salinities between 0 - 35 ‰ (Molony, 2001).                                                                                                                                                                                                                                                                                                                                                                                                                                                                                                                                                      | High   |
| 49                             | 8.06 | Are there effective natural enemies (predators) of the taxon present in the RA area?                                                                                                      | Yes      | The rainbow trout is prey for larger fish, fish eating birds, including herons and kingfishers, and mammals ( <a href="https://www.chesapeakebay.net/discover/field-guide/entry/rainbow_trout">https://www.chesapeakebay.net/discover/field-guide/entry/rainbow_trout</a> )                                                                                                                                                                                                                                                                                                                                                                                                                           | Medium |
| <b>C. Climate change</b>       |      |                                                                                                                                                                                           |          |                                                                                                                                                                                                                                                                                                                                                                                                                                                                                                                                                                                                                                                                                                       |        |
| <b>9. Climate change</b>       |      |                                                                                                                                                                                           |          |                                                                                                                                                                                                                                                                                                                                                                                                                                                                                                                                                                                                                                                                                                       |        |
| 50                             | 9.01 | Under the predicted future climatic conditions, are the risks of entry into the RA area posed by the taxon likely to increase, decrease or not change?                                    | Decrease | Warming of rivers can be assumed to affect these populations by exceeding temperature preference and tolerance limits (Matulla et al., 2007).                                                                                                                                                                                                                                                                                                                                                                                                                                                                                                                                                         | Medium |
| 51                             | 9.02 | Under the predicted future climatic conditions, are the risks of establishment posed by the taxon likely to increase, decrease or not change?                                             | Decrease | Warming of rivers can be assumed to affect these populations by exceeding temperature preference and tolerance limits (Matulla et al., 2007).                                                                                                                                                                                                                                                                                                                                                                                                                                                                                                                                                         | Medium |
| 52                             | 9.03 | Under the predicted future climatic conditions, are the risks of dispersal within the RA area posed by the taxon likely to increase, decrease or not change?                              | Decrease | Warming of rivers can be assumed to affect these populations by exceeding temperature preference and tolerance limits (Matulla et al., 2007).                                                                                                                                                                                                                                                                                                                                                                                                                                                                                                                                                         | Medium |
| 53                             | 9.04 | Under the predicted future climatic conditions, what is the likely magnitude of future potential impacts on biodiversity and/or ecological integrity/status?                              | Lower    | Warming of rivers can be assumed to affect these populations by exceeding temperature preference and tolerance limits (Matulla et al., 2007).                                                                                                                                                                                                                                                                                                                                                                                                                                                                                                                                                         | Medium |
| 54                             | 9.05 | Under the predicted future climatic conditions, what is the likely magnitude of future potential impacts on ecosystem structure and/or function?                                          | Lower    | Warming of rivers can be assumed to affect these populations by exceeding temperature preference and tolerance limits (Matulla et al., 2007).                                                                                                                                                                                                                                                                                                                                                                                                                                                                                                                                                         | Medium |
| 55                             | 9.06 | Under the predicted future climatic conditions, what is the likely magnitude of future potential impacts on ecosystem services/socio-economic factors?                                    | Lower    | Warming of rivers can be assumed to affect these populations by exceeding temperature preference and tolerance limits (Matulla et al., 2007).                                                                                                                                                                                                                                                                                                                                                                                                                                                                                                                                                         | Medium |

| Statistics      |      |
|-----------------|------|
| Scores          |      |
| BRA             | 38.0 |
| BRA Outcome     | -    |
| BRA+CCA         | 26.0 |
| BRA+CCA Outcome | -    |

| Score partition                                |              |
|------------------------------------------------|--------------|
| <b>A. Biogeography/Historical</b>              | <b>24.0</b>  |
| 1. Domestication/Cultivation                   | 4.0          |
| 2. Climate, distribution and introduction risk | 2.0          |
| 3. Invasive elsewhere                          | 18.0         |
| <b>B. Biology/Ecology</b>                      | <b>14.0</b>  |
| 4. Undesirable (or persistence) traits         | 8.0          |
| 5. Resource exploitation                       | 5.0          |
| 6. Reproduction                                | 1.0          |
| 7. Dispersal mechanisms                        | 3.0          |
| 8. Tolerance attributes                        | -3.0         |
| <b>C. Climate change</b>                       | <b>-12.0</b> |
| 9. Climate change                              | -12.0        |
| Answered Questions                             |              |
| <b>Total</b>                                   | <b>55</b>    |
| <b>A. Biogeography/Historical</b>              | <b>13</b>    |
| 1. Domestication/Cultivation                   | 3            |
| 2. Climate, distribution and introduction risk | 5            |
| 3. Invasive elsewhere                          | 5            |
| <b>B. Biology/Ecology</b>                      | <b>36</b>    |
| 4. Undesirable (or persistence) traits         | 12           |
| 5. Resource exploitation                       | 2            |
| 6. Reproduction                                | 7            |
| 7. Dispersal mechanisms                        | 9            |
| 8. Tolerance attributes                        | 6            |
| <b>C. Climate change</b>                       | <b>6</b>     |
| 9. Climate change                              | 6            |
| Sectors affected                               |              |
| <b>Commercial</b>                              | <b>17</b>    |
| <b>Environmental</b>                           | <b>8</b>     |
| <b>Species or population nuisance traits</b>   | <b>6</b>     |

| Thresholds     |             |
|----------------|-------------|
| <b>BRA</b>     | <b>-</b>    |
| <b>BRA+CCA</b> | <b>-</b>    |
| Confidence     |             |
| <b>BRA+CCA</b> | <b>0.63</b> |
| <b>BRA</b>     | <b>0.64</b> |
| <b>CCA</b>     | <b>0.50</b> |

| Date and Time       |  |
|---------------------|--|
| 28/05/2021 08:59:34 |  |

## AS-ISK v2

| Taxon and Assessor details         |                                         |
|------------------------------------|-----------------------------------------|
| Category                           | Fishes and Lampreys (freshwater)        |
| Taxon name                         | <i>Oncorhynchus mykiss</i>              |
| Common name                        | rainbow trout                           |
| Assessor                           | Tena Radocaj                            |
| Risk screening context             |                                         |
| Reason and socio-economic benefits |                                         |
| Risk assessment area               | Danube & Adriatic basins BA, HR, ME, RS |
| Taxonomy                           |                                         |
| Native range                       |                                         |
| Introduced range                   |                                         |
| URL                                |                                         |

|                                                |      | Response                                                                                                                                                                | Justification (references and/or other information) | Confidence                                                                                                                                                                                                                                                                                                                                                                                                          |           |
|------------------------------------------------|------|-------------------------------------------------------------------------------------------------------------------------------------------------------------------------|-----------------------------------------------------|---------------------------------------------------------------------------------------------------------------------------------------------------------------------------------------------------------------------------------------------------------------------------------------------------------------------------------------------------------------------------------------------------------------------|-----------|
| A. Biogeography/Historical                     |      |                                                                                                                                                                         |                                                     |                                                                                                                                                                                                                                                                                                                                                                                                                     |           |
| 1. Domestication/Cultivation                   |      |                                                                                                                                                                         |                                                     |                                                                                                                                                                                                                                                                                                                                                                                                                     |           |
| 1                                              | 1.01 | Has the taxon been the subject of domestication (or cultivation) for at least 20 generations?                                                                           | Yes                                                 | Baruš V. and Oliva O. 1995. Fauna of the Czech and Slovak Republics. Volume 28/2. Fishes - Osteichthyes. Academia, Praha. (in Czech with English summary).                                                                                                                                                                                                                                                          | Very high |
| 2                                              | 1.02 | Is the taxon harvested in the wild and likely to be sold or used in its live form?                                                                                      | Yes                                                 | Rainbow trout is most important trout species in croatia aquaculture (90 %)                                                                                                                                                                                                                                                                                                                                         | Medium    |
| 3                                              | 1.03 | Does the taxon have invasive races, varieties, sub-taxa or congeners?                                                                                                   | No                                                  | Baruš V. and Oliva O. 1995. Fauna of the Czech and Slovak Republics. Volume 28/2. Fishes - Osteichthyes. Academia, Praha. (in Czech with English summary).                                                                                                                                                                                                                                                          | Very high |
| 2. Climate, distribution and introduction risk |      |                                                                                                                                                                         |                                                     |                                                                                                                                                                                                                                                                                                                                                                                                                     |           |
| 4                                              | 2.01 | How similar are the climatic conditions of the Risk Assessment (RA) area and the taxon's native range?                                                                  | High                                                | Baruš V. and Oliva O. 1995. Fauna of the Czech and Slovak Republics. Volume 28/2. Fishes - Osteichthyes. Academia, Praha. (in Czech with English summary).                                                                                                                                                                                                                                                          | High      |
| 5                                              | 2.02 | What is the quality of the climate matching data?                                                                                                                       | High                                                | Baruš V. and Oliva O. 1995. Fauna of the Czech and Slovak Republics. Volume 28/2. Fishes - Osteichthyes. Academia, Praha. (in Czech with English summary). plus climatch                                                                                                                                                                                                                                            | Very high |
| 6                                              | 2.03 | Is the taxon already present outside of captivity in the RA area?                                                                                                       | Yes                                                 | R. trout is present in Croatia                                                                                                                                                                                                                                                                                                                                                                                      | Very high |
| 7                                              | 2.04 | How many potential vectors could the taxon use to enter in the RA area?                                                                                                 | None                                                | R. trout is present in Croatia                                                                                                                                                                                                                                                                                                                                                                                      | Very high |
| 8                                              | 2.05 | Is the taxon currently found in close proximity to, and likely to enter into, the RA area in the near future (e.g. unintentional and intentional introductions)?        | Not applicable                                      | not applicable                                                                                                                                                                                                                                                                                                                                                                                                      | Very high |
| 3. Invasive elsewhere                          |      |                                                                                                                                                                         |                                                     |                                                                                                                                                                                                                                                                                                                                                                                                                     |           |
| 9                                              | 3.01 | Has the taxon become naturalised (established viable populations) outside its native range?                                                                             | Yes                                                 | Baruš V. and Oliva O. 1995. Fauna of the Czech and Slovak Republics. Volume 28/2. Fishes - Osteichthyes. Academia, Praha. (in Czech with English summary). Welcomme, R.L., 1988. International introductions of inland aquatic species. FAO Fish.                                                                                                                                                                   | Very high |
| 10                                             | 3.02 | In the taxon's introduced range, are there known adverse impacts to wild stocks or commercial taxa?                                                                     | Yes                                                 | Baruš V. and Oliva O. 1995. Fauna of the Czech and Slovak Republics. Volume 28/2. Fishes - Osteichthyes. Academia, Praha. (in Czech with English summary).                                                                                                                                                                                                                                                          | Very high |
| 11                                             | 3.03 | In the taxon's introduced range, are there known adverse impacts to aquaculture?                                                                                        | Yes                                                 | Baruš V. and Oliva O. 1995. Fauna of the Czech and Slovak Republics. Volume 28/2. Fishes - Osteichthyes. Academia, Praha. (in Czech with English summary).                                                                                                                                                                                                                                                          | Very high |
| 12                                             | 3.04 | In the taxon's introduced range, are there known adverse impacts to ecosystem services?                                                                                 | Yes                                                 | Baruš V. and Oliva O. 1995. Fauna of the Czech and Slovak Republics. Volume 28/2. Fishes - Osteichthyes. Academia, Praha. (in Czech with English summary).                                                                                                                                                                                                                                                          | Very high |
| 13                                             | 3.05 | In the taxon's introduced range, are there known adverse socio-economic impacts?                                                                                        | Yes                                                 | Baruš V. and Oliva O. 1995. Fauna of the Czech and Slovak Republics. Volume 28/2. Fishes - Osteichthyes. Academia, Praha. (in Czech with English summary).                                                                                                                                                                                                                                                          | Low       |
| B. Biology/Ecology                             |      |                                                                                                                                                                         |                                                     |                                                                                                                                                                                                                                                                                                                                                                                                                     |           |
| 4. Undesirable (or persistence) traits         |      |                                                                                                                                                                         |                                                     |                                                                                                                                                                                                                                                                                                                                                                                                                     |           |
| 14                                             | 4.01 | Is it likely that the taxon will be poisonous or pose other risks to human health?                                                                                      | No                                                  | Baruš V. and Oliva O. 1995. Fauna of the Czech and Slovak Republics. Volume 28/2. Fishes - Osteichthyes. Academia, Praha. (in Czech with English summary).                                                                                                                                                                                                                                                          | Very high |
| 15                                             | 4.02 | Is it likely that the taxon will smother one or more native taxa (that are not threatened or protected)?                                                                | Yes                                                 | Baruš V. and Oliva O. 1995. Fauna of the Czech and Slovak Republics. Volume 28/2. Fishes - Osteichthyes. Academia, Praha. (in Czech with English summary).                                                                                                                                                                                                                                                          | Very high |
| 16                                             | 4.03 | Are there any threatened or protected taxa that the non-native taxon would parasitise in the RA area?                                                                   | No                                                  | Baruš V. and Oliva O. 1995. Fauna of the Czech and Slovak Republics. Volume 28/2. Fishes - Osteichthyes. Academia, Praha. (in Czech with English summary).                                                                                                                                                                                                                                                          | Very high |
| 17                                             | 4.04 | Is the taxon adaptable in terms of climatic and other environmental conditions, thus enhancing its potential persistence if it has invaded or could invade the RA area? | Yes                                                 | R. trout adapted on climate and another environmental condition in RA area, it has developed self-sustaining populations in Croatia                                                                                                                                                                                                                                                                                 | High      |
| 18                                             | 4.05 | Is the taxon likely to disrupt food-web structure/function in aquatic ecosystems if it has invaded or is likely to invade the RA area?                                  | Yes                                                 | Maybe, there is a possibility that the taxon will impair the nutritional structure and function of the ecosystem in the RA area. Becasue of that Rainbow trout are known to have damaged native species populations (through competition and predation). (Hasegawa, K. Invasions of rainbow trout and brown trout in Japan: A comparison of invasiveness and impact on native species. Ecology of Freshwater Fish.) | High      |
| 19                                             | 4.06 | Is the taxon likely to exert adverse impacts on ecosystem services in the RA area?                                                                                      | No                                                  | The taxon will not adversely affect ecosystem services in the RA area. There is no recorded negative impact on aquaculture.                                                                                                                                                                                                                                                                                         | Medium    |
| 20                                             | 4.07 | Is it likely that the taxon will host, and/or act as a vector for, recognised pests and infectious agents that are endemic in the RA                                    | Yes                                                 | Yes, the taxon may be a host or vector of known pests and infectious agents endemic to RA area. Because in every area exist infectious agents and pests.                                                                                                                                                                                                                                                            | Medium    |
| 21                                             | 4.08 | Is it likely that the taxon will host, and/or act as a vector for, recognised pests and infectious agents that are absent from (novel to) the RA area?                  | Yes                                                 | Rainbow trout were infected concomitantly with Argulus coregoni and Flavobacterium columnare (Bandilla, M., Valtonen, E. T., Suomalainen, L. R., Aphalo, P. J., & Hakalahti, T. (2006). A link between ectoparasite infection and susceptibility to bacterial disease in rainbow trout. International journal for parasitology,                                                                                     | High      |

|                                 |      |                                                                                                                                                                              |                |                                                                                                                                                                                                                                                                |           |
|---------------------------------|------|------------------------------------------------------------------------------------------------------------------------------------------------------------------------------|----------------|----------------------------------------------------------------------------------------------------------------------------------------------------------------------------------------------------------------------------------------------------------------|-----------|
| 22                              | 4.09 | Is it likely that the taxon will achieve a body size that will make it more likely to be released from captivity?                                                            | Yes            | Baruš V. and Oliva O. 1995. Fauna of the Czech and Slovak Republics. Volume 28/2. Fishes - Osteichthyes. Academia, Praha. (in Czech with English summary).                                                                                                     | Very high |
| 23                              | 4.10 | Is the taxon capable of sustaining itself in a range of water velocity conditions (e.g. versatile in habitat use)?                                                           | Yes            | Baruš V. and Oliva O. 1995. Fauna of the Czech and Slovak Republics. Volume 28/2. Fishes - Osteichthyes. Academia, Praha. (in Czech with English summary).                                                                                                     | Very high |
| 24                              | 4.11 | Is it likely that the taxon's mode of existence (e.g. excretion of by-products) or behaviours (e.g. feeding) will reduce habitat quality for native taxa?                    | Yes            | Baruš V. and Oliva O. 1995. Fauna of the Czech and Slovak Republics. Volume 28/2. Fishes - Osteichthyes. Academia, Praha. (in Czech with English summary).                                                                                                     | Very high |
| 25                              | 4.12 | Is the taxon likely to maintain a viable population even when present in low densities (or persisting in adverse conditions by way of a dormant form)?                       | No             | Baruš V. and Oliva O. 1995. Fauna of the Czech and Slovak Republics. Volume 28/2. Fishes - Osteichthyes. Academia, Praha. (in Czech with English summary).                                                                                                     | High      |
| <b>5. Resource exploitation</b> |      |                                                                                                                                                                              |                |                                                                                                                                                                                                                                                                |           |
| 26                              | 5.01 | Is the taxon likely to consume threatened or protected native taxa in the RA area?                                                                                           | Yes            | The diet sometimes includes native salmonids and other fish species. It is possible that it consume endangered and protected native taxa in the RA area. If there are protected taxa in the RA area will consume them, whether or not the taxon is endangered. | Medium    |
| 27                              | 5.02 | Is the taxon likely to sequester food resources (including nutrients) to the detriment of native taxa in the RA area?                                                        | Not applicable | not applicable                                                                                                                                                                                                                                                 | Very high |
| <b>6. Reproduction</b>          |      |                                                                                                                                                                              |                |                                                                                                                                                                                                                                                                |           |
| 28                              | 6.01 | Is the taxon likely to exhibit parental care and/or to reduce age-at-maturity in response to environmental conditions?                                                       | No             | Baruš V. and Oliva O. 1995. Fauna of the Czech and Slovak Republics. Volume 28/2. Fishes - Osteichthyes. Academia, Praha. (in Czech with English summary).                                                                                                     | Very high |
| 29                              | 6.02 | Is the taxon likely to produce viable gametes or propagules (in the RA area)?                                                                                                | Yes            | Baruš V. and Oliva O. 1995. Fauna of the Czech and Slovak Republics. Volume 28/2. Fishes - Osteichthyes. Academia, Praha. (in Czech with English summary).                                                                                                     | High      |
| 30                              | 6.03 | Is the taxon likely to hybridise naturally with native taxa?                                                                                                                 | No             | Baruš V. and Oliva O. 1995. Fauna of the Czech and Slovak Republics. Volume 28/2. Fishes - Osteichthyes. Academia, Praha. (in Czech with English summary).                                                                                                     | Very high |
| 31                              | 6.04 | Is the taxon likely to be hermaphroditic or to display asexual reproduction?                                                                                                 | No             | Baruš V. and Oliva O. 1995. Fauna of the Czech and Slovak Republics. Volume 28/2. Fishes - Osteichthyes. Academia, Praha. (in Czech with English summary).                                                                                                     | Very high |
| 32                              | 6.05 | Is the taxon dependent on the presence of another taxon (or specific habitat features) to complete its life cycle?                                                           | No             | Baruš V. and Oliva O. 1995. Fauna of the Czech and Slovak Republics. Volume 28/2. Fishes - Osteichthyes. Academia, Praha. (in Czech with English summary).                                                                                                     | Very high |
| 33                              | 6.06 | Is the taxon known (or likely) to produce a large number of propagules or offspring within a short time span (e.g. < 1 year)?                                                | No             | Baruš V. and Oliva O. 1995. Fauna of the Czech and Slovak Republics. Volume 28/2. Fishes - Osteichthyes. Academia, Praha. (in Czech with English summary).                                                                                                     | Very high |
| 34                              | 6.07 | How many time units (days, months, years) does the taxon require to reach the age-at-first-reproduction?                                                                     | 2              | Baruš V. and Oliva O. 1995. Fauna of the Czech and Slovak Republics. Volume 28/2. Fishes - Osteichthyes. Academia, Praha. (in Czech with English summary).                                                                                                     | Very high |
| <b>7. Dispersal mechanisms</b>  |      |                                                                                                                                                                              |                |                                                                                                                                                                                                                                                                |           |
| 35                              | 7.01 | How many potential internal vectors/pathways could the taxon use to disperse within the RA area (with suitable habitats nearby)?                                             | >1             | 1. anglers for recreational fishing 2. flooding 3. natural spread via natural and manmade watercourses (Hasegawa, K. Invasions of rainbow trout and brown trout in Japan: A comparison of invasiveness and impact on native species. Ecology of Freshwater     | Medium    |
| 36                              | 7.02 | Will any of these vectors/pathways bring the taxon in close proximity to one or more protected areas (e.g. MCZ, MPA, SSSI)?                                                  | Yes            | This species is present in protect area.                                                                                                                                                                                                                       | Low       |
| 37                              | 7.03 | Does the taxon have a means of actively attaching itself to hard substrata (e.g. ship hulls, pilings, buoys) such that it enhances the likelihood of dispersal?              | No             | no                                                                                                                                                                                                                                                             | Very high |
| 38                              | 7.04 | Is natural dispersal of the taxon likely to occur as eggs (for animals) or as propagules (for plants: seeds, spores) in the RA area?                                         | No             | Baruš V. and Oliva O. 1995. Fauna of the Czech and Slovak Republics. Volume 28/2. Fishes - Osteichthyes. Academia, Praha. (in Czech with English summary).                                                                                                     | Very high |
| 39                              | 7.05 | Is natural dispersal of the taxon likely to occur as larvae/juveniles (for animals) or as fragments/seedlings (for plants) in the RA area?                                   | Yes            | Baruš V. and Oliva O. 1995. Fauna of the Czech and Slovak Republics. Volume 28/2. Fishes - Osteichthyes. Academia, Praha. (in Czech with English summary).                                                                                                     | High      |
| 40                              | 7.06 | Are older life stages of the taxon likely to migrate in the RA area for reproduction?                                                                                        | Yes            | Baruš V. and Oliva O. 1995. Fauna of the Czech and Slovak Republics. Volume 28/2. Fishes - Osteichthyes. Academia, Praha. (in Czech with English summary).                                                                                                     | Very high |
| 41                              | 7.07 | Are propagules or eggs of the taxon likely to be dispersed in the RA area by other animals?                                                                                  | No             | Baruš V. and Oliva O. 1995. Fauna of the Czech and Slovak Republics. Volume 28/2. Fishes - Osteichthyes. Academia, Praha. (in Czech with English summary).                                                                                                     | Very high |
| 42                              | 7.08 | Is dispersal of the taxon along any of the vectors/pathways mentioned in the previous seven questions (35–41; i.e. both unintentional or intentional) likely to be           | Yes            | There is a possibility of a high rate of spread of taxa. Eg. if a fertilized individual enters a new area by any means of expansion.                                                                                                                           | Medium    |
| 43                              | 7.09 | Is dispersal of the taxon density dependent?                                                                                                                                 | No             | Baruš V. and Oliva O. 1995. Fauna of the Czech and Slovak Republics. Volume 28/2. Fishes - Osteichthyes. Academia, Praha. (in Czech with English summary).                                                                                                     | High      |
| <b>8. Tolerance attributes</b>  |      |                                                                                                                                                                              |                |                                                                                                                                                                                                                                                                |           |
| 44                              | 8.01 | Is the taxon able to withstand being out of water for extended periods (e.g. minimum of one or more hours) at some stage of its life cycle?                                  | No             | Baruš V. and Oliva O. 1995. Fauna of the Czech and Slovak Republics. Volume 28/2. Fishes - Osteichthyes. Academia, Praha. (in Czech with English summary).                                                                                                     | Very high |
| 45                              | 8.02 | Is the taxon tolerant of a wide range of water quality conditions relevant to that taxon? [In the Justification field, indicate the relevant water quality variable(s) being | Yes            | Baruš V. and Oliva O. 1995. Fauna of the Czech and Slovak Republics. Volume 28/2. Fishes - Osteichthyes. Academia, Praha. (in Czech with English summary).                                                                                                     | High      |
| 46                              | 8.03 | Can the taxon be controlled or eradicated in the wild with chemical, biological, or other agents/means?                                                                      | Not applicable | Baruš V. and Oliva O. 1995. Fauna of the Czech and Slovak Republics. Volume 28/2. Fishes - Osteichthyes. Academia, Praha. (in Czech with English summary).                                                                                                     | Very high |
| 47                              | 8.04 | Is the taxon likely to tolerate or benefit from environmental/human disturbance?                                                                                             | No             | Baruš V. and Oliva O. 1995. Fauna of the Czech and Slovak Republics. Volume 28/2. Fishes - Osteichthyes. Academia, Praha. (in Czech with English summary).                                                                                                     | High      |

|                          |      |                                                                                                                                                              |                |                                                                                                                                                                                                                                                                                                                                                                                                                |           |
|--------------------------|------|--------------------------------------------------------------------------------------------------------------------------------------------------------------|----------------|----------------------------------------------------------------------------------------------------------------------------------------------------------------------------------------------------------------------------------------------------------------------------------------------------------------------------------------------------------------------------------------------------------------|-----------|
| 48                       | 8.05 | Is the taxon able to tolerate salinity levels that are higher or lower than those found in its usual environment?                                            | Yes            | Baruš V. and Oliva O. 1995. Fauna of the Czech and Slovak Republics. Volume 28/2. Fishes - Osteichthyes. Academia, Praha. (in Czech with English summary).                                                                                                                                                                                                                                                     | Very high |
| 49                       | 8.06 | Are there effective natural enemies (predators) of the taxon present in the RA area?                                                                         | No             | Baruš V. and Oliva O. 1995. Fauna of the Czech and Slovak Republics. Volume 28/2. Fishes - Osteichthyes. Academia, Praha. (in Czech with English summary).                                                                                                                                                                                                                                                     | Very high |
| <b>C. Climate change</b> |      |                                                                                                                                                              |                |                                                                                                                                                                                                                                                                                                                                                                                                                |           |
| <b>9. Climate change</b> |      |                                                                                                                                                              |                |                                                                                                                                                                                                                                                                                                                                                                                                                |           |
| 50                       | 9.01 | Under the predicted future climatic conditions, are the risks of entry into the RA area posed by the taxon likely to increase, decrease or not change?       | Not applicable | not applicable                                                                                                                                                                                                                                                                                                                                                                                                 | Very high |
| 51                       | 9.02 | Under the predicted future climatic conditions, are the risks of establishment posed by the taxon likely to increase, decrease or not change?                | Increase       | The risk of a taxon becoming domesticated is increasing. Rainbow trout ( <i>Oncorhynchus mykiss</i> ), is better adapted to higher water temperatures. Matulla, C., Schmutz, S., Melcher, A., Gerersdorfer, T., & Haas, P. (2007). Assessing the impact of a downscaled climate change simulation on the fish fauna in an Inner-Alpine River. <i>International journal of biometeorology</i> , 52(2), 127-137. | Medium    |
| 52                       | 9.03 | Under the predicted future climatic conditions, are the risks of dispersal within the RA area posed by the taxon likely to increase, decrease or not change? | Increase       | The risk of distribution of this taxon is increased. Matulla, C., Schmutz, S., Melcher, A., Gerersdorfer, T., & Haas, P. (2007). Assessing the impact of a downscaled climate change simulation on the fish fauna in an Inner-Alpine River. <i>International journal of biometeorology</i> , 52(2), 127-137.                                                                                                   | Medium    |
| 53                       | 9.04 | Under the predicted future climatic conditions, what is the likely magnitude of future potential impacts on biodiversity and/or ecological integrity/status? | Higher         | Increase                                                                                                                                                                                                                                                                                                                                                                                                       | Medium    |
| 54                       | 9.05 | Under the predicted future climatic conditions, what is the likely magnitude of future potential impacts on ecosystem structure and/or function?             | Higher         | Rainbow trout are known to have damaged native species populations (through competition and predation). Matulla, C., Schmutz, S., Melcher, A., Gerersdorfer, T., & Haas, P. (2007). Assessing the impact of a downscaled climate change simulation on the fish fauna in an Inner-Alpine River. <i>International journal of biometeorology</i> , 52(2), 127-137.                                                | Medium    |
| 55                       | 9.06 | Under the predicted future climatic conditions, what is the likely magnitude of future potential impacts on ecosystem services/socio-economic factors?       | Higher         | Matulla, C., Schmutz, S., Melcher, A., Gerersdorfer, T., & Haas, P. (2007). Assessing the impact of a downscaled climate change simulation on the fish fauna in an Inner-Alpine River. <i>International journal of biometeorology</i> , 52(2), 127-137.                                                                                                                                                        | Medium    |

| Statistics                                     |             |
|------------------------------------------------|-------------|
| Scores                                         |             |
| <b>BRA</b>                                     | <b>38.0</b> |
| <b>BRA Outcome</b>                             | <b>-</b>    |
| <b>BRA+CCA</b>                                 | <b>48.0</b> |
| <b>BRA+CCA Outcome</b>                         | <b>-</b>    |
| Score partition                                |             |
| <b>A. Biogeography/Historical</b>              | <b>20.0</b> |
| 1. Domestication/Cultivation                   | 2.0         |
| 2. Climate, distribution and introduction risk | 0.0         |
| 3. Invasive elsewhere                          | 18.0        |
| <b>B. Biology/Ecology</b>                      | <b>18.0</b> |
| 4. Undesirable (or persistence) traits         | 8.0         |
| 5. Resource exploitation                       | 5.0         |
| 6. Reproduction                                | 0.0         |
| 7. Dispersal mechanisms                        | 2.0         |
| 8. Tolerance attributes                        | 3.0         |
| <b>C. Climate change</b>                       | <b>10.0</b> |
| 9. Climate change                              | 10.0        |
| Answered Questions                             |             |
| <b>Total</b>                                   | <b>55</b>   |
| <b>A. Biogeography/Historical</b>              | <b>13</b>   |
| 1. Domestication/Cultivation                   | 3           |
| 2. Climate, distribution and introduction risk | 5           |
| 3. Invasive elsewhere                          | 5           |
| <b>B. Biology/Ecology</b>                      | <b>36</b>   |
| 4. Undesirable (or persistence) traits         | 12          |
| 5. Resource exploitation                       | 2           |
| 6. Reproduction                                | 7           |
| 7. Dispersal mechanisms                        | 9           |
| 8. Tolerance attributes                        | 6           |
| <b>C. Climate change</b>                       | <b>6</b>    |
| 9. Climate change                              | 6           |
| Sectors affected                               |             |
| <b>Commercial</b>                              | <b>19</b>   |
| <b>Environmental</b>                           | <b>16</b>   |
| <b>Species or population nuisance traits</b>   | <b>16</b>   |

| Thresholds     |             |
|----------------|-------------|
| <b>BRA</b>     | <b>-</b>    |
| <b>BRA+CCA</b> | <b>-</b>    |
| Confidence     |             |
| <b>BRA+CCA</b> | <b>0.83</b> |
| <b>BRA</b>     | <b>0.86</b> |
| <b>CCA</b>     | <b>0.58</b> |

| Date and Time       |  |
|---------------------|--|
| 02/06/2020 09:54:41 |  |

## AS-ISK v2

| Taxon and Assessor details         |                                         |
|------------------------------------|-----------------------------------------|
| Category                           | Fishes and Lampreys (freshwater)        |
| Taxon name                         | <i>Oncorhynchus tshawytscha</i>         |
| Common name                        | chinook salmon                          |
| Assessor                           | Ana Marić                               |
| Risk screening context             |                                         |
| Reason and socio-economic benefits |                                         |
| Risk assessment area               | Danube & Adriatic basins BA, HR, ME, RS |
| Taxonomy                           |                                         |
| Native range                       |                                         |
| Introduced range                   |                                         |
| URL                                |                                         |

|                                                       |      |                                                                                                                                                                         | Response | Justification (references and/or other information)                                                                                                                                                                                                                                                                                                                                                                                                                                                         | Confidence |
|-------------------------------------------------------|------|-------------------------------------------------------------------------------------------------------------------------------------------------------------------------|----------|-------------------------------------------------------------------------------------------------------------------------------------------------------------------------------------------------------------------------------------------------------------------------------------------------------------------------------------------------------------------------------------------------------------------------------------------------------------------------------------------------------------|------------|
| <b>A. Biogeography / Historical</b>                   |      |                                                                                                                                                                         |          |                                                                                                                                                                                                                                                                                                                                                                                                                                                                                                             |            |
| <b>1. Domestication/Cultivation</b>                   |      |                                                                                                                                                                         |          |                                                                                                                                                                                                                                                                                                                                                                                                                                                                                                             |            |
| 1                                                     | 1.01 | Has the taxon been the subject of domestication (or cultivation) for at least 20 generations?                                                                           | Yes      | Genetic Variation within and Between Domesticated Chinook Salmon, <i>Oncorhynchus tshawytscha</i> , Strains and their Progenitor Populations Ji Eun Kim, Ruth E. Withler, Carol Ritland & Kimberly                                                                                                                                                                                                                                                                                                          | Very high  |
| 2                                                     | 1.02 | Is the taxon harvested in the wild and likely to be sold or used in its live form?                                                                                      | Yes      | Genetic Variation within and Between Domesticated Chinook Salmon, <i>Oncorhynchus tshawytscha</i> , Strains and their Progenitor Populations Ji Eun Kim, Ruth E. Withler, Carol Ritland & Kimberly M. Cheng. 2004 <a href="https://www.fisheries.noaa.gov/species/chinook-https://www.cabi.org/isc/datasheet/71815#toidentity incasive itself? and rainbow trout">https://www.fisheries.noaa.gov/species/chinook-https://www.cabi.org/isc/datasheet/71815#toidentity incasive itself? and rainbow trout</a> | Very high  |
| 3                                                     | 1.03 | Does the taxon have invasive races, varieties, sub-taxa or congeners?                                                                                                   | Yes      |                                                                                                                                                                                                                                                                                                                                                                                                                                                                                                             | Very high  |
| <b>2. Climate, distribution and introduction risk</b> |      |                                                                                                                                                                         |          |                                                                                                                                                                                                                                                                                                                                                                                                                                                                                                             |            |
| 4                                                     | 2.01 | How similar are the climatic conditions of the Risk Assessment (RA) area and the taxon's native range?                                                                  | Medium   | Koppen Geiger climate system                                                                                                                                                                                                                                                                                                                                                                                                                                                                                | High       |
| 5                                                     | 2.02 | What is the quality of the climate matching data?                                                                                                                       | Medium   | climach 11/26 in 5 in target region, 10-8-5-3-1 in source region of 653                                                                                                                                                                                                                                                                                                                                                                                                                                     | Very high  |
| 6                                                     | 2.03 | Is the taxon already present outside of captivity in the RA area?                                                                                                       | No       | Identifying threats from introduced a 1 nd translocated non-native freshwater fishes in neighbouring countries under current and future climatic conditions Tena Radočaj a, Ivan Špelić a, Lorenzo Vilizzi b, *, Meta Povž c, Marina Piria. 2021                                                                                                                                                                                                                                                            | Very high  |
| 7                                                     | 2.04 | How many potential vectors could the taxon use to enter in the RA area?                                                                                                 | One      | Stocking                                                                                                                                                                                                                                                                                                                                                                                                                                                                                                    | High       |
| 8                                                     | 2.05 | Is the taxon currently found in close proximity to, and likely to enter into, the RA area in the near future (e.g. unintentional and intentional introductions)?        | No       | Identifying threats from introduced a 1 nd translocated non-native freshwater fishes in neighbouring countries under current and future climatic conditions Tena Radočaj a, Ivan Špelić a, Lorenzo Vilizzi b, *, Meta Povž c, Marina Piria 2021                                                                                                                                                                                                                                                             | Very high  |
| <b>3. Invasive elsewhere</b>                          |      |                                                                                                                                                                         |          |                                                                                                                                                                                                                                                                                                                                                                                                                                                                                                             |            |
| 9                                                     | 3.01 | Has the taxon become naturalised (established viable populations) outside its                                                                                           | Yes      | Impacts of Introduced and Translocated Freshwater Fishes in Australia A.H. ARTHINGTON. 1989                                                                                                                                                                                                                                                                                                                                                                                                                 | Very high  |
| 10                                                    | 3.02 | In the taxon's introduced range, are there known adverse impacts to wild stocks or commercial taxa?                                                                     | Yes      | Impacts of Introduced and Translocated Freshwater Fishes in Australia A.H. ARTHINGTON 1989. Center for Catchment and In-st ream Research.                                                                                                                                                                                                                                                                                                                                                                   | Very high  |
| 11                                                    | 3.03 | In the taxon's introduced range, are there known adverse impacts to aquaculture?                                                                                        | No       | Establishment of Chinook salmon ( <i>Oncorhynchus tshawytscha</i> ) in Pacific basins of southern South America and its potential ecosystem implications. DORIS SOTO1, 2, IVÁN ARISMENDI1, CECILIA DI PRINZIO3 & FERNANDO JARA 2007                                                                                                                                                                                                                                                                         | Very high  |
| 12                                                    | 3.04 | In the taxon's introduced range, are there known adverse impacts to ecosystem services?                                                                                 | No       | <a href="https://www.fishbase.se/summary/Oncorhynchus-tshawytscha.html">https://www.fishbase.se/summary/Oncorhynchus-tshawytscha.html</a> Establishment of Chinook salmon ( <i>Oncorhynchus tshawytscha</i> ) in Pacific basins of southern South America and its potential ecosystem implications. DORIS SOTO1, 2, IVÁN ARISMENDI1, CECILIA DI PRINZIO3 & FERNANDO JARA                                                                                                                                    | High       |
| 13                                                    | 3.05 | In the taxon's introduced range, are there known adverse socio-economic impacts?                                                                                        | No       | Establishment of Chinook salmon ( <i>Oncorhynchus tshawytscha</i> ) in Pacific basins of southern South America and its potential ecosystem implications. DORIS SOTO1, 2, IVÁN ARISMENDI1, CECILIA DI PRINZIO3 & FERNANDO JARA 2007                                                                                                                                                                                                                                                                         | High       |
| <b>B. Biology / Ecology</b>                           |      |                                                                                                                                                                         |          |                                                                                                                                                                                                                                                                                                                                                                                                                                                                                                             |            |
| <b>4. Undesirable (or persistence) traits</b>         |      |                                                                                                                                                                         |          |                                                                                                                                                                                                                                                                                                                                                                                                                                                                                                             |            |
| 14                                                    | 4.01 | Is it likely that the taxon will be poisonous or pose other risks to human health?                                                                                      | No       | <a href="https://www.fishbase.se/summary/Oncorhynchus-tshawytscha.html">https://www.fishbase.se/summary/Oncorhynchus-tshawytscha.html</a>                                                                                                                                                                                                                                                                                                                                                                   | Very high  |
| 15                                                    | 4.02 | Is it likely that the taxon will smother one or more native taxa (that are not threatened or protected)?                                                                | Yes      | Impacts of Introduced and Translocated Freshwater Fishes in Australia A.H. ARTHINGTON Center for Catchment and In-st ream Research. 1989                                                                                                                                                                                                                                                                                                                                                                    | High       |
| 16                                                    | 4.03 | Are there any threatened or protected taxa that the non-native taxon would parasitise in the RA area?                                                                   | No       | <a href="https://www.fishbase.se/summary/Oncorhynchus-tshawytscha.html">https://www.fishbase.se/summary/Oncorhynchus-tshawytscha.html</a>                                                                                                                                                                                                                                                                                                                                                                   | Very high  |
| 17                                                    | 4.04 | Is the taxon adaptable in terms of climatic and other environmental conditions, thus enhancing its potential persistence if it has invaded or could invade the RA area? | Yes      | <a href="https://www.cabi.org/isc/datasheet/71815#toclimate">https://www.cabi.org/isc/datasheet/71815#toclimate</a>                                                                                                                                                                                                                                                                                                                                                                                         | High       |
| 18                                                    | 4.05 | Is the taxon likely to disrupt food-web structure/function in aquatic ecosystems if it has invaded or is likely to invade the RA                                        | Yes      | Impacts of Introduced and Translocated Freshwater Fishes in Australia A.H. ARTHINGTON Center for Catchment and In-st ream Research. 1989                                                                                                                                                                                                                                                                                                                                                                    | High       |
| 19                                                    | 4.06 | Is the taxon likely to exert adverse impacts on ecosystem services in the RA area?                                                                                      | No       | <a href="https://www.cabi.org/isc/datasheet/71815#toclimate">https://www.cabi.org/isc/datasheet/71815#toclimate</a>                                                                                                                                                                                                                                                                                                                                                                                         | High       |
| 20                                                    | 4.07 | Is it likely that the taxon will host, and/or act as a vector for, recognised pests and infectious agents that are endemic in the RA                                    | Yes      | Marine netpen farming leads to infections with some unusual parasites Author links open overlay panelMichael LKent 2000                                                                                                                                                                                                                                                                                                                                                                                     | High       |
| 21                                                    | 4.08 | Is it likely that the taxon will host, and/or act as a vector for, recognised pests and infectious agents that are absent from (novel to) the RA area?                  | Yes      | Marine netpen farming leads to infections with some unusual parasites Author links open overlay panelMichael LKent                                                                                                                                                                                                                                                                                                                                                                                          | High       |
| 22                                                    | 4.09 | Is it likely that the taxon will achieve a body size that will make it more likely to be released from captivity?                                                       | Yes      | <a href="https://www.cabi.org/isc/datasheet/71815#topathwayCauses">https://www.cabi.org/isc/datasheet/71815#topathwayCauses</a>                                                                                                                                                                                                                                                                                                                                                                             | Very high  |



|                                 |      |                                                                                                                                                                              |           |                                                                                                                                                                                                                                                                                |           |
|---------------------------------|------|------------------------------------------------------------------------------------------------------------------------------------------------------------------------------|-----------|--------------------------------------------------------------------------------------------------------------------------------------------------------------------------------------------------------------------------------------------------------------------------------|-----------|
| 23                              | 4.10 | Is the taxon capable of sustaining itself in a range of water velocity conditions (e.g. versatile in habitat use)?                                                           | Yes       | <a href="https://www.cabi.org/isc/datasheet/71815#towaterTolerances">https://www.cabi.org/isc/datasheet/71815#towaterTolerances</a>                                                                                                                                            | Very high |
| 24                              | 4.11 | Is it likely that the taxon's mode of existence (e.g. excretion of by-products) or behaviours (e.g. feeding) will reduce habitat quality for native taxa?                    | No        | <a href="https://www.fishbase.se/summary/Oncorhynchus-tshawytscha.html">https://www.fishbase.se/summary/Oncorhynchus-tshawytscha.html</a>                                                                                                                                      | High      |
| 25                              | 4.12 | Is the taxon likely to maintain a viable population even when present in low densities (or persisting in adverse conditions by way of a dormant form)?                       | No        | <a href="https://www.cabi.org/isc/datasheet/71815#tonaturalEnemies">https://www.cabi.org/isc/datasheet/71815#tonaturalEnemies</a>                                                                                                                                              | High      |
| <b>5. Resource exploitation</b> |      |                                                                                                                                                                              |           |                                                                                                                                                                                                                                                                                |           |
| 26                              | 5.01 | Is the taxon likely to consume threatened or protected native taxa in the RA area?                                                                                           | Yes       | <a href="https://www.cabi.org/isc/datasheet/71815#tonaturalEnemies">https://www.cabi.org/isc/datasheet/71815#tonaturalEnemies</a><br><a href="https://www.fishbase.se/summary/Oncorhynchus-tshawytscha.html">https://www.fishbase.se/summary/Oncorhynchus-tshawytscha.html</a> | Very high |
| 27                              | 5.02 | Is the taxon likely to sequester food resources (including nutrients) to the detriment of native taxa in the RA area?                                                        | Yes       | Impacts of Introduced and Translocated Freshwater Fishes in Australia A.H. ARTHINGTON Center for Catchment and In-stream Research. 1989                                                                                                                                        | High      |
| <b>6. Reproduction</b>          |      |                                                                                                                                                                              |           |                                                                                                                                                                                                                                                                                |           |
| 28                              | 6.01 | Is the taxon likely to exhibit parental care and/or to reduce age-at-maturity in response to environmental conditions?                                                       | Yes       | Changes in Size and Age of Chinook Salmon <i>Oncorhynchus tshawytscha</i> Returning to Alaska Bert Lewis ,W. Stewart Grant,Richard E. Brenner,Toshihide Hamazaki. 2015                                                                                                         | High      |
| 29                              | 6.02 | Is the taxon likely to produce viable gametes or propagules (in the RA area)?                                                                                                | Yes       | As O, mykiss is                                                                                                                                                                                                                                                                | Medium    |
| 30                              | 6.03 | Is the taxon likely to hybridise naturally with native taxa?                                                                                                                 | No        | <a href="https://www.cabi.org/isc/datasheet/71815#tonaturalEnemies">https://www.cabi.org/isc/datasheet/71815#tonaturalEnemies</a>                                                                                                                                              | Medium    |
| 31                              | 6.04 | Is the taxon likely to be hermaphroditic or to display asexual reproduction?                                                                                                 | Yes       | <a href="https://www.cabi.org/isc/datasheet/71815#tonaturalEnemies">https://www.cabi.org/isc/datasheet/71815#tonaturalEnemies</a>                                                                                                                                              | High      |
| 32                              | 6.05 | Is the taxon dependent on the presence of another taxon (or specific habitat features) to complete its life cycle?                                                           | No        | <a href="https://www.cabi.org/isc/datasheet/71815#toriskAndImpactFactors">https://www.cabi.org/isc/datasheet/71815#toriskAndImpactFactors</a>                                                                                                                                  | Very high |
| 33                              | 6.06 | Is the taxon known (or likely) to produce a large number of propagules or offspring within a short time span (e.g. < 1 year)?                                                | Yes       | <a href="https://www.cabi.org/isc/datasheet/71815#toriskAndImpactFactors">https://www.cabi.org/isc/datasheet/71815#toriskAndImpactFactors</a>                                                                                                                                  | Very high |
| 34                              | 6.07 | How many time units (days, months, years) does the taxon require to reach the age-at-first-reproduction?                                                                     | 3         | <a href="https://www.fisheries.noaa.gov/species/chinook-salmon">https://www.fisheries.noaa.gov/species/chinook-salmon</a>                                                                                                                                                      | Very high |
| <b>7. Dispersal mechanisms</b>  |      |                                                                                                                                                                              |           |                                                                                                                                                                                                                                                                                |           |
| 35                              | 7.01 | How many potential internal vectors/pathways could the taxon use to disperse within the RA area (with suitable protected areas (e.g. MCZ, MPA, SSSI)?                        | One       | Most probably stocking                                                                                                                                                                                                                                                         | Very high |
| 36                              | 7.02 | Will any of these vectors/pathways bring the taxon in close proximity to one or more protected areas (e.g. MCZ, MPA, SSSI)?                                                  | Yes       | Stocking protected area                                                                                                                                                                                                                                                        | High      |
| 37                              | 7.03 | Does the taxon have a means of actively attaching itself to hard substrata (e.g. ship hulls, pilings, buoys) such that it enhances the likelihood of dispersal?              | No        | <a href="https://www.fisheries.noaa.gov/species/chinook-salmon">https://www.fisheries.noaa.gov/species/chinook-salmon</a>                                                                                                                                                      | High      |
| 38                              | 7.04 | Is natural dispersal of the taxon likely to occur as eggs (for animals) or as propagules (for plants: seeds, spores) in the RA area?                                         | No        | <a href="https://www.fishbase.se/summary/Oncorhynchus-tshawytscha.html">https://www.fishbase.se/summary/Oncorhynchus-tshawytscha.html</a>                                                                                                                                      | Very high |
| 39                              | 7.05 | Is natural dispersal of the taxon likely to occur as larvae/juveniles (for animals) or as fragments/seedlings (for plants) in the RA area?                                   | Yes       | <a href="https://www.fishbase.se/summary/Oncorhynchus-tshawytscha.html">https://www.fishbase.se/summary/Oncorhynchus-tshawytscha.html</a>                                                                                                                                      | High      |
| 40                              | 7.06 | Are older life stages of the taxon likely to migrate in the RA area for reproduction?                                                                                        | Yes       | <a href="https://www.fishbase.se/summary/Oncorhynchus-tshawytscha.html">https://www.fishbase.se/summary/Oncorhynchus-tshawytscha.html</a>                                                                                                                                      | Very high |
| 41                              | 7.07 | Are propagules or eggs of the taxon likely to be dispersed in the RA area by other animals?                                                                                  | No        | <a href="https://www.fishbase.se/summary/Oncorhynchus-tshawytscha.html">https://www.fishbase.se/summary/Oncorhynchus-tshawytscha.html</a>                                                                                                                                      | Very high |
| 42                              | 7.08 | Is dispersal of the taxon along any of the vectors/pathways mentioned in the previous seven questions (35–41; i.e. both unintentional or intentional) likely to be           | No        | <a href="https://www.cabi.org/isc/datasheet/71815#toriskAndImpactFactors">https://www.cabi.org/isc/datasheet/71815#toriskAndImpactFactors</a>                                                                                                                                  | High      |
| 43                              | 7.09 | Is dispersal of the taxon density dependent?                                                                                                                                 | Yes       | The Interplay between Climate Variability and Density Dependence in the Population Viability of Chinook Salmon RICHARD W. ZABEL,* MARK D. SCHEUERELL, MICHETT M. McCLURE, AND JOHN G. WILLIAMS. 2006                                                                           | High      |
| <b>8. Tolerance attributes</b>  |      |                                                                                                                                                                              |           |                                                                                                                                                                                                                                                                                |           |
| 44                              | 8.01 | Is the taxon able to withstand being out of water for extended periods (e.g. minimum of one or more hours) at some stage of its life cycle?                                  | No        | <a href="https://www.cabi.org/isc/datasheet/71815#toriskAndImpactFactors">https://www.cabi.org/isc/datasheet/71815#toriskAndImpactFactors</a>                                                                                                                                  | High      |
| 45                              | 8.02 | Is the taxon tolerant of a wide range of water quality conditions relevant to that taxon? [In the Justification field, indicate the relevant water quality variable(s) being | No        | <a href="https://www.cabi.org/isc/datasheet/71815#toriskAndImpactFactors">https://www.cabi.org/isc/datasheet/71815#toriskAndImpactFactors</a> oxygen, ammonia...                                                                                                               | High      |
| 46                              | 8.03 | Can the taxon be controlled or eradicated in the wild with chemical, biological, or other agents/means?                                                                      | No        | <a href="https://www.cabi.org/isc/datasheet/71815#toriskAndImpactFactors">https://www.cabi.org/isc/datasheet/71815#toriskAndImpactFactors</a>                                                                                                                                  | Very high |
| 47                              | 8.04 | Is the taxon likely to tolerate or benefit from environmental/human disturbance?                                                                                             | No        | <a href="https://www.cabi.org/isc/datasheet/71815#toriskAndImpactFactors">https://www.cabi.org/isc/datasheet/71815#toriskAndImpactFactors</a>                                                                                                                                  | Medium    |
| 48                              | 8.05 | Is the taxon able to tolerate salinity levels that are higher or lower than those found in its usual environment?                                                            | Yes       | <a href="https://www.fishbase.se/summary/Oncorhynchus-tshawytscha.html">https://www.fishbase.se/summary/Oncorhynchus-tshawytscha.html</a>                                                                                                                                      | High      |
| 49                              | 8.06 | Are there effective natural enemies (predators) of the taxon present in the RA                                                                                               | Yes       | <a href="https://www.cabi.org/isc/datasheet/71815#tonaturalEnemies">https://www.cabi.org/isc/datasheet/71815#tonaturalEnemies</a>                                                                                                                                              | Very high |
| <b>C. Climate change</b>        |      |                                                                                                                                                                              |           |                                                                                                                                                                                                                                                                                |           |
| <b>9. Climate change</b>        |      |                                                                                                                                                                              |           |                                                                                                                                                                                                                                                                                |           |
| 50                              | 9.01 | Under the predicted future climatic conditions, are the risks of entry into the RA area posed by the taxon likely to increase, decrease or not change?                       | No change | Stocking                                                                                                                                                                                                                                                                       | Very high |

|    |      |                                                                                                                                                              |           |                                                                                                                                                                                                                    |           |
|----|------|--------------------------------------------------------------------------------------------------------------------------------------------------------------|-----------|--------------------------------------------------------------------------------------------------------------------------------------------------------------------------------------------------------------------|-----------|
| 51 | 9.02 | Under the predicted future climatic conditions, are the risks of establishment posed by the taxon likely to increase, decrease or not change?                | Decrease  | Potential climate change impacts on thermal habitats of Pacific salmon ( <i>Oncorhynchus</i> spp.) in the North Pacific Ocean and adjacent seas Omar I. Abdul-Aziz, Nathan J. Mantua, and Katherine W. Myers. 2010 | Very high |
| 52 | 9.03 | Under the predicted future climatic conditions, are the risks of dispersal within the RA area posed by the taxon likely to increase, decrease or not change? | No change | Potential climate change impacts on thermal habitats of Pacific salmon ( <i>Oncorhynchus</i> spp.) in the North Pacific Ocean and adjacent seas Omar I. Abdul-Aziz, Nathan J. Mantua, and Katherine W. Myers. 2010 | High      |
| 53 | 9.04 | Under the predicted future climatic conditions, what is the likely magnitude of future potential impacts on biodiversity and/or ecological integrity/status? | Lower     | Potential climate change impacts on thermal habitats of Pacific salmon ( <i>Oncorhynchus</i> spp.) in the North Pacific Ocean and adjacent seas Omar I. Abdul-Aziz, Nathan J. Mantua, and Katherine W. Myers. 2010 | High      |
| 54 | 9.05 | Under the predicted future climatic conditions, what is the likely magnitude of future potential impacts on ecosystem structure and/or function?             | Lower     | Potential climate change impacts on thermal habitats of Pacific salmon ( <i>Oncorhynchus</i> spp.) in the North Pacific Ocean and adjacent seas Omar I. Abdul-Aziz, Nathan J. Mantua, and Katherine W. Myers. 2010 | High      |
| 55 | 9.06 | Under the predicted future climatic conditions, what is the likely magnitude of future potential impacts on ecosystem services/socio-economic factors?       | Lower     | Potential climate change impacts on thermal habitats of Pacific salmon ( <i>Oncorhynchus</i> spp.) in the North Pacific Ocean and adjacent seas Omar I. Abdul-Aziz, Nathan J. Mantua, and Katherine W. Myers. 2010 | High      |

| Statistics                                     |             |
|------------------------------------------------|-------------|
| Scores                                         |             |
| <b>BRA</b>                                     | <b>26.5</b> |
| <b>BRA Outcome</b>                             | <b>-</b>    |
| <b>BRA+CCA</b>                                 | <b>18.5</b> |
| <b>BRA+CCA Outcome</b>                         | <b>-</b>    |
| Score partition                                |             |
| <b>A. Biogeography/Historical</b>              | <b>8.5</b>  |
| 1. Domestication/Cultivation                   | 4.0         |
| 2. Climate, distribution and introduction risk | 0.0         |
| 3. Invasive elsewhere                          | 4.5         |
| <b>B. Biology/Ecology</b>                      | <b>18.0</b> |
| 4. Undesirable (or persistence) traits         | 7.0         |
| 5. Resource exploitation                       | 7.0         |
| 6. Reproduction                                | 4.0         |
| 7. Dispersal mechanisms                        | 1.0         |
| 8. Tolerance attributes                        | -1.0        |
| <b>C. Climate change</b>                       | <b>-8.0</b> |
| 9. Climate change                              | -8.0        |
| Answered Questions                             |             |
| <b>Total</b>                                   | <b>55</b>   |
| <b>A. Biogeography/Historical</b>              | <b>13</b>   |
| 1. Domestication/Cultivation                   | 3           |
| 2. Climate, distribution and introduction risk | 5           |
| 3. Invasive elsewhere                          | 5           |
| <b>B. Biology/Ecology</b>                      | <b>36</b>   |
| 4. Undesirable (or persistence) traits         | 12          |
| 5. Resource exploitation                       | 2           |
| 6. Reproduction                                | 7           |
| 7. Dispersal mechanisms                        | 9           |
| 8. Tolerance attributes                        | 6           |
| <b>C. Climate change</b>                       | <b>6</b>    |
| 9. Climate change                              | 6           |
| Sectors affected                               |             |
| <b>Commercial</b>                              | <b>4</b>    |
| <b>Environmental</b>                           | <b>3</b>    |
| <b>Species or population nuisance traits</b>   | <b>13</b>   |

| Thresholds     |             |
|----------------|-------------|
| <b>BRA</b>     | <b>-</b>    |
| <b>BRA+CCA</b> | <b>-</b>    |
| Confidence     |             |
| <b>BRA+CCA</b> | <b>0.85</b> |
| <b>BRA</b>     | <b>0.85</b> |
| <b>CCA</b>     | <b>0.83</b> |

| Date and Time       |  |
|---------------------|--|
| 23/05/2021 16:37:28 |  |

AS-ISK v2

| Taxon and Assessor details         |                                         |
|------------------------------------|-----------------------------------------|
| Category                           | Fishes and Lampreys (freshwater)        |
| Taxon name                         | <i>Oncorhynchus tshawytscha</i>         |
| Common name                        | chinook salmon                          |
| Assessor                           | Ivan Špelić                             |
| Risk screening context             |                                         |
| Reason and socio-economic benefits |                                         |
| Risk assessment area               | Danube & Adriatic basins BA, HR, ME, RS |
| Taxonomy                           |                                         |
| Native range                       |                                         |
| Introduced range                   |                                         |
| URL                                |                                         |

|                                                |      |                                                                                                                                                                         | Response | Justification (references and/or other information)                                                                                                                                                                                                                                                                                                                                                                                                                                                                                                                                                  | Confidence |
|------------------------------------------------|------|-------------------------------------------------------------------------------------------------------------------------------------------------------------------------|----------|------------------------------------------------------------------------------------------------------------------------------------------------------------------------------------------------------------------------------------------------------------------------------------------------------------------------------------------------------------------------------------------------------------------------------------------------------------------------------------------------------------------------------------------------------------------------------------------------------|------------|
| A. Biogeography / Historical                   |      |                                                                                                                                                                         |          |                                                                                                                                                                                                                                                                                                                                                                                                                                                                                                                                                                                                      |            |
| 1. Domestication/Cultivation                   |      |                                                                                                                                                                         |          |                                                                                                                                                                                                                                                                                                                                                                                                                                                                                                                                                                                                      |            |
| 1                                              | 1.01 | Has the taxon been the subject of domestication (or cultivation) for at least 20 generations?                                                                           | Yes      | Species Fact Sheet: <i>Oncorhynchus tshawytscha</i> (Walbaum, 1792). FAO. Archived from the original on 3 April 2020.                                                                                                                                                                                                                                                                                                                                                                                                                                                                                | Very high  |
| 2                                              | 1.02 | Is the taxon harvested in the wild and likely to be sold or used in its live form?                                                                                      | Yes      | Maybe for restocking (personal opinion).                                                                                                                                                                                                                                                                                                                                                                                                                                                                                                                                                             | Low        |
| 3                                              | 1.03 | Does the taxon have invasive races, varieties, sub-taxa or congeners?                                                                                                   | Yes      | <i>O. mykiss</i> (CABI 2019).                                                                                                                                                                                                                                                                                                                                                                                                                                                                                                                                                                        | Very high  |
| 2. Climate, distribution and introduction risk |      |                                                                                                                                                                         |          |                                                                                                                                                                                                                                                                                                                                                                                                                                                                                                                                                                                                      |            |
| 4                                              | 2.01 | How similar are the climatic conditions of the Risk Assessment (RA) area and the taxon's native range?                                                                  | High     | Climatch 2020                                                                                                                                                                                                                                                                                                                                                                                                                                                                                                                                                                                        | Medium     |
| 5                                              | 2.02 | What is the quality of the climate matching data?                                                                                                                       | Medium   | Climatch 2020                                                                                                                                                                                                                                                                                                                                                                                                                                                                                                                                                                                        | High       |
| 6                                              | 2.03 | Is the taxon already present outside of captivity in the RA area?                                                                                                       | No       | Froese, R. and D. Pauly. Editors. 2021.FishBase. World Wide Web electronic publication. <a href="http://www.fishbase.org">www.fishbase.org</a> , ( 02/2021 )                                                                                                                                                                                                                                                                                                                                                                                                                                         | Very high  |
| 7                                              | 2.04 | How many potential vectors could the taxon use to enter in the RA area?                                                                                                 | >1       | Escape from aquaculture, introduced for angling (CABI 2019).                                                                                                                                                                                                                                                                                                                                                                                                                                                                                                                                         | Medium     |
| 8                                              | 2.05 | Is the taxon currently found in close proximity to, and likely to enter into, the RA area in the near future (e.g. unintentional and intentional introductions)?        | No       | Not established in Europe (Froese & Pauly 2020).                                                                                                                                                                                                                                                                                                                                                                                                                                                                                                                                                     | High       |
| 3. Invasive elsewhere                          |      |                                                                                                                                                                         |          |                                                                                                                                                                                                                                                                                                                                                                                                                                                                                                                                                                                                      |            |
| 9                                              | 3.01 | Has the taxon become naturalised (established viable populations) outside its native range?                                                                             | Yes      | Fuller, P., G. Jacobs, M. Cannister, J. Larson, and A. Fusaro, 2020, <i>Oncorhynchus tshawytscha</i> (Walbaum in Artedi, 1792): U.S. Geological Survey, Nonindigenous Aquatic Species Database, Gainesville, FL, <a href="https://nas.er.usgs.gov/queries/FactSheet.aspx?speciesID=920">https://nas.er.usgs.gov/queries/FactSheet.aspx?speciesID=920</a> , Revision Date: 12/20/2019, Peer Review Date: 6/26/2014, Access Date: 4/28/2020                                                                                                                                                            | High       |
| 10                                             | 3.02 | In the taxon's introduced range, are there known adverse impacts to wild stocks or commercial taxa?                                                                     | Yes      | Fuller, P., G. Jacobs, M. Cannister, J. Larson, and A. Fusaro, 2020, <i>Oncorhynchus tshawytscha</i> (Walbaum in Artedi, 1792): U.S. Geological Survey, Nonindigenous Aquatic Species Database, Gainesville, FL, <a href="https://nas.er.usgs.gov/queries/FactSheet.aspx?speciesID=920">https://nas.er.usgs.gov/queries/FactSheet.aspx?speciesID=920</a> , Revision Date: 12/20/2019, Peer Review Date: 6/26/2014, Access Date: 4/28/2020                                                                                                                                                            | High       |
| 11                                             | 3.03 | In the taxon's introduced range, are there known adverse impacts to aquaculture?                                                                                        | No       | Farmed and no adverse impacts (Species Fact Sheet: <i>Oncorhynchus tshawytscha</i> (Walbaum, 1792). FAO. Archived from the original on 3 April 2020.).                                                                                                                                                                                                                                                                                                                                                                                                                                               | High       |
| 12                                             | 3.04 | In the taxon's introduced range, are there known adverse impacts to ecosystem                                                                                           | No       | No examples in introduced areas.                                                                                                                                                                                                                                                                                                                                                                                                                                                                                                                                                                     | Medium     |
| 13                                             | 3.05 | In the taxon's introduced range, are there known adverse socio-economic impacts?                                                                                        | No       | Positive impact on sportfishing (Scott, C. 2003. "Oncorhynchus tshawytscha" (On-line), Animal Diversity Web. Accessed April 28, 2020 at <a href="https://animaldiversity.org/accounts/Oncorhynchus_tshawytscha/">https://animaldiversity.org/accounts/Oncorhynchus_tshawytscha/</a> )                                                                                                                                                                                                                                                                                                                | Medium     |
| B. Biology / Ecology                           |      |                                                                                                                                                                         |          |                                                                                                                                                                                                                                                                                                                                                                                                                                                                                                                                                                                                      |            |
| 4. Undesirable (or persistence) traits         |      |                                                                                                                                                                         |          |                                                                                                                                                                                                                                                                                                                                                                                                                                                                                                                                                                                                      |            |
| 14                                             | 4.01 | Is it likely that the taxon will be poisonous or pose other risks to human health?                                                                                      | No       | Potential pest but no direct risk (Froese & Pauly 2020).                                                                                                                                                                                                                                                                                                                                                                                                                                                                                                                                             | High       |
| 15                                             | 4.02 | Is it likely that the taxon will smother one or more native taxa (that are not threatened or protected)?                                                                | Yes      | Fuller, P., G. Jacobs, M. Cannister, J. Larson, and A. Fusaro, 2020, <i>Oncorhynchus tshawytscha</i> (Walbaum in Artedi, 1792): U.S. Geological Survey, Nonindigenous Aquatic Species Database, Gainesville, FL, <a href="https://nas.er.usgs.gov/queries/FactSheet.aspx?speciesID=920">https://nas.er.usgs.gov/queries/FactSheet.aspx?speciesID=920</a> , Revision Date: 12/20/2019, Peer Review Date: 6/26/2014, Access Date: 4/28/2020                                                                                                                                                            | Medium     |
| 16                                             | 4.03 | Are there any threatened or protected taxa that the non-native taxon would parasitise in the RA area?                                                                   | No       | No parasitic behaviour.                                                                                                                                                                                                                                                                                                                                                                                                                                                                                                                                                                              | Very high  |
| 17                                             | 4.04 | Is the taxon adaptable in terms of climatic and other environmental conditions, thus enhancing its potential persistence if it has invaded or could invade the RA area? | No       | The freshwater streams are relatively deep with coarse gravel. The water must be cool, under 14 C for maximum survival, and fast flowing (Scott, C. 2003. "Oncorhynchus tshawytscha" (On-line), Animal Diversity Web. Accessed April 28, 2020 at <a href="https://animaldiversity.org/accounts/Oncorhynchus_tshawytscha/">https://animaldiversity.org/accounts/Oncorhynchus_tshawytscha/</a> )                                                                                                                                                                                                       | High       |
| 18                                             | 4.05 | Is the taxon likely to disrupt food-web structure/function in aquatic ecosystems if it has invaded or is likely to invade the RA area?                                  | Yes      | CABI 2019 listed altered trophic level as invasion outcome but there is no documented evidence. In Great Lakes caused a substantial loss of forage fish (Fuller, P., G. Jacobs, M. Cannister, J. Larson, and A. Fusaro, 2020, <i>Oncorhynchus tshawytscha</i> (Walbaum in Artedi, 1792): U.S. Geological Survey, Nonindigenous Aquatic Species Database, Gainesville, FL, <a href="https://nas.er.usgs.gov/queries/FactSheet.aspx?speciesID=920">https://nas.er.usgs.gov/queries/FactSheet.aspx?speciesID=920</a> , Revision Date: 12/20/2019, Peer Review Date: 6/26/2014, Access Date: 4/28/2020). | Medium     |

|                                 |      |                                                                                                                                                                 |                |                                                                                                                                                                                                                                                                                                                                                                                                                                                                                                                                                                                                                                                                                                                                                                                                                                                                                                                                                                                                                                                                                     |           |
|---------------------------------|------|-----------------------------------------------------------------------------------------------------------------------------------------------------------------|----------------|-------------------------------------------------------------------------------------------------------------------------------------------------------------------------------------------------------------------------------------------------------------------------------------------------------------------------------------------------------------------------------------------------------------------------------------------------------------------------------------------------------------------------------------------------------------------------------------------------------------------------------------------------------------------------------------------------------------------------------------------------------------------------------------------------------------------------------------------------------------------------------------------------------------------------------------------------------------------------------------------------------------------------------------------------------------------------------------|-----------|
| 19                              | 4.06 | Is the taxon likely to exert adverse impacts on ecosystem services in the RA area?                                                                              | No             | No examples of such impacts in invaded areas.                                                                                                                                                                                                                                                                                                                                                                                                                                                                                                                                                                                                                                                                                                                                                                                                                                                                                                                                                                                                                                       | Medium    |
| 20                              | 4.07 | Is it likely that the taxon will host, and/or act as a vector for, recognised pests and infectious agents that are endemic in the RA area?                      | Yes            | Rauque, C., Viozzi, G., Flores, V., Vega, R., Waicheim, A., & Salgado-Maldonado, G. (2018). Helminth parasites of alien freshwater fishes in Patagonia (Argentina). <i>International journal for parasitology. Parasites and wildlife</i> , 7(3), 369–379. <a href="https://doi.org/10.1016/j.iippaw.2018.09.008">https://doi.org/10.1016/j.iippaw.2018.09.008</a>                                                                                                                                                                                                                                                                                                                                                                                                                                                                                                                                                                                                                                                                                                                  | High      |
| 21                              | 4.08 | Is it likely that the taxon will host, and/or act as a vector for, recognised pests and infectious agents that are absent from (novel to) the RA area?          | Yes            | Rauque, C., Viozzi, G., Flores, V., Vega, R., Waicheim, A., & Salgado-Maldonado, G. (2018). Helminth parasites of alien freshwater fishes in Patagonia (Argentina). <i>International journal for parasitology. Parasites and wildlife</i> , 7(3), 369–379. <a href="https://doi.org/10.1016/j.iippaw.2018.09.008">https://doi.org/10.1016/j.iippaw.2018.09.008</a>                                                                                                                                                                                                                                                                                                                                                                                                                                                                                                                                                                                                                                                                                                                  | High      |
| 22                              | 4.09 | Is it likely that the taxon will achieve a body size that will make it more likely to be released from captivity?                                               | Yes            | 150 cm, 61 kg (Froese & Pauly 2020).                                                                                                                                                                                                                                                                                                                                                                                                                                                                                                                                                                                                                                                                                                                                                                                                                                                                                                                                                                                                                                                | Very high |
| 23                              | 4.10 | Is the taxon capable of sustaining itself in a range of water velocity conditions (e.g. versatile in habitat use)?                                              | Yes            | Streams, lakes, sea (Froese & Pauly 2020).                                                                                                                                                                                                                                                                                                                                                                                                                                                                                                                                                                                                                                                                                                                                                                                                                                                                                                                                                                                                                                          | Very high |
| 24                              | 4.11 | Is it likely that the taxon's mode of existence (e.g. excretion of by-products) or behaviours (e.g. feeding) will reduce habitat quality for native taxa?       | No             | Supply of marine derived nutrients to headwaters (Soto D, Arismendi I, Di Prinzio C, Jara F (2007) Establishment of Chinook Salmon ( <i>Oncorhynchus tshawytscha</i> ) in Pacific basins of Southern South America and its potential ecosystem implications. <i>Rev Chil Hist Nat</i> 80:81–98), but this is not likely for Slovenia (personal)                                                                                                                                                                                                                                                                                                                                                                                                                                                                                                                                                                                                                                                                                                                                     | Medium    |
| 25                              | 4.12 | Is the taxon likely to maintain a viable population even when present in low densities (or persisting in adverse conditions by way of a dormant form)?          | No             | Establishments of populations in new areas are very rare (CABI 2019).                                                                                                                                                                                                                                                                                                                                                                                                                                                                                                                                                                                                                                                                                                                                                                                                                                                                                                                                                                                                               | High      |
| <b>5. Resource exploitation</b> |      |                                                                                                                                                                 |                |                                                                                                                                                                                                                                                                                                                                                                                                                                                                                                                                                                                                                                                                                                                                                                                                                                                                                                                                                                                                                                                                                     |           |
| 26                              | 5.01 | Is the taxon likely to consume threatened or protected native taxa in the RA area?                                                                              | Yes            | Food in streams is mainly terrestrial insects and small crustaceans; adults prey on fish in the sea (Froese & Pauly 2020). Landlocked populations in great lakes feed on fish (Fuller, P., G. Jacobs, M. Cannister, J. Larson, and A. Fusaro, 2020, <i>Oncorhynchus tshawytscha</i> (Walbaum in Artdedi, 1792): U.S. Geological Survey, Nonindigenous Aquatic Species Database, Gainesville, FL, <a href="https://nas.er.usgs.gov/queries/FactSheet.aspx?speciesID=920">https://nas.er.usgs.gov/queries/FactSheet.aspx?speciesID=920</a> , Revision Date: 12/20/2019, Peer Review Date: 6/26/2014, Access                                                                                                                                                                                                                                                                                                                                                                                                                                                                           | Medium    |
| 27                              | 5.02 | Is the taxon likely to sequester food resources (including nutrients) to the detriment of native taxa in the RA area?                                           | Not applicable | No obtained data for calculation.                                                                                                                                                                                                                                                                                                                                                                                                                                                                                                                                                                                                                                                                                                                                                                                                                                                                                                                                                                                                                                                   | Very high |
| <b>6. Reproduction</b>          |      |                                                                                                                                                                 |                |                                                                                                                                                                                                                                                                                                                                                                                                                                                                                                                                                                                                                                                                                                                                                                                                                                                                                                                                                                                                                                                                                     |           |
| 28                              | 6.01 | Is the taxon likely to exhibit parental care and/or to reduce age-at-maturity in response to environmental conditions?                                          | No             | Froese & Pauly 2020                                                                                                                                                                                                                                                                                                                                                                                                                                                                                                                                                                                                                                                                                                                                                                                                                                                                                                                                                                                                                                                                 | Very high |
| 29                              | 6.02 | Is the taxon likely to produce viable gametes or propagules (in the RA area)?                                                                                   | No             | Never established in Europe despite continuous effort through history (Crawford SS, Muir AM (2008) Global introductions of salmon and trout in the genus <i>Oncorhynchus</i> : 1870–2007. <i>Reviews in Fish Biology and Fisheries</i> 18: 313– 344.).                                                                                                                                                                                                                                                                                                                                                                                                                                                                                                                                                                                                                                                                                                                                                                                                                              | Very high |
| 30                              | 6.03 | Is the taxon likely to hybridise naturally with native taxa?                                                                                                    | No             | No related native taxa (Kottelat & Freyhof 2007).                                                                                                                                                                                                                                                                                                                                                                                                                                                                                                                                                                                                                                                                                                                                                                                                                                                                                                                                                                                                                                   | Very high |
| 31                              | 6.04 | Is the taxon likely to be hermaphroditic or to display asexual reproduction?                                                                                    | No             | No reports in literature.                                                                                                                                                                                                                                                                                                                                                                                                                                                                                                                                                                                                                                                                                                                                                                                                                                                                                                                                                                                                                                                           | Very high |
| 32                              | 6.05 | Is the taxon dependent on the presence of another taxon (or specific habitat features) to complete its life cycle?                                              | Yes            | Anadromous spawner, needs specific habitats. Freshwater streams, estuaries, and the open ocean are all important habitats. The freshwater streams are relatively deep with coarse gravel. The water must be cool, under 14 C for maximum survival, and fast flowing. There are landlocked populations in Great Lakes but they also migrate to connected streams to spawn (Scott, C. 2003. " <i>Oncorhynchus tshawytscha</i> " (On-line), Animal Diversity Web. Accessed April 28, 2020 at <a href="https://animaldiversity.org/accounts/Oncorhynchus_tshawytscha/">https://animaldiversity.org/accounts/Oncorhynchus_tshawytscha/</a> ; Fuller, P., G. Jacobs, M. Cannister, J. Larson, and A. Fusaro, 2020, <i>Oncorhynchus tshawytscha</i> (Walbaum in Artdedi, 1792): U.S. Geological Survey, Nonindigenous Aquatic Species Database, Gainesville, FL, <a href="https://nas.er.usgs.gov/queries/FactSheet.aspx?speciesID=920">https://nas.er.usgs.gov/queries/FactSheet.aspx?speciesID=920</a> , Revision Date: 12/20/2019, Peer Review Date: 6/26/2014, Access Date: 4/28/2020) | Very high |
| 33                              | 6.06 | Is the taxon known (or likely) to produce a large number of propagules or offspring within a short time span (e.g. < 1 year)?                                   | Yes            | Max 13,600 eggs per female (Froese & Pauly 2020).                                                                                                                                                                                                                                                                                                                                                                                                                                                                                                                                                                                                                                                                                                                                                                                                                                                                                                                                                                                                                                   | High      |
| 34                              | 6.07 | How many time units (days, months, years) does the taxon require to reach the age-at-first-reproduction?                                                        | 2              | Varies from 2-7 (Froese & Pauly 2020).                                                                                                                                                                                                                                                                                                                                                                                                                                                                                                                                                                                                                                                                                                                                                                                                                                                                                                                                                                                                                                              | Medium    |
| <b>7. Dispersal mechanisms</b>  |      |                                                                                                                                                                 |                |                                                                                                                                                                                                                                                                                                                                                                                                                                                                                                                                                                                                                                                                                                                                                                                                                                                                                                                                                                                                                                                                                     |           |
| 35                              | 7.01 | How many potential internal vectors/pathways could the taxon use to disperse within the RA area (with suitable)                                                 | One            | Introductions for angling.                                                                                                                                                                                                                                                                                                                                                                                                                                                                                                                                                                                                                                                                                                                                                                                                                                                                                                                                                                                                                                                          | Medium    |
| 36                              | 7.02 | Will any of these vectors/pathways bring the taxon in close proximity to one or more protected areas (e.g. MCZ, MPA, SSSI)?                                     | No             | Personal opinion.                                                                                                                                                                                                                                                                                                                                                                                                                                                                                                                                                                                                                                                                                                                                                                                                                                                                                                                                                                                                                                                                   | Low       |
| 37                              | 7.03 | Does the taxon have a means of actively attaching itself to hard substrata (e.g. ship hulls, pilings, buoys) such that it enhances the likelihood of dispersal? | No             | No adaptations.                                                                                                                                                                                                                                                                                                                                                                                                                                                                                                                                                                                                                                                                                                                                                                                                                                                                                                                                                                                                                                                                     | Very high |
| 38                              | 7.04 | Is natural dispersal of the taxon likely to occur as eggs (for animals) or as propagules (for plants: seeds, spores) in the RA area?                            | No             | Almost certainly it will not establish a viable population due to non optimum conditions (Crawford SS, Muir AM (2008) Global introductions of salmon and trout in the genus <i>Oncorhynchus</i> : 1870–2007. <i>Reviews in Fish Biology and Fisheries</i> 18: 313– 344.).                                                                                                                                                                                                                                                                                                                                                                                                                                                                                                                                                                                                                                                                                                                                                                                                           | Very high |

|                                |      |                                                                                                                                                                              |           |                                                                                                                                                                                                                                                                                                                        |           |
|--------------------------------|------|------------------------------------------------------------------------------------------------------------------------------------------------------------------------------|-----------|------------------------------------------------------------------------------------------------------------------------------------------------------------------------------------------------------------------------------------------------------------------------------------------------------------------------|-----------|
| 39                             | 7.05 | Is natural dispersal of the taxon likely to occur as larvae/juveniles (for animals) or as fragments/seedlings (for plants) in the RA area?                                   | No        | Almost certainly it will not spawn in RA area due to non optimum conditions (Crawford SS, Muir AM (2008) Global introductions of salmon and trout in the genus <i>Oncorhynchus</i> : 1870–2007. Reviews in Fish Biology and Fisheries 18: 313– 344).                                                                   | Very high |
| 40                             | 7.06 | Are older life stages of the taxon likely to migrate in the RA area for reproduction?                                                                                        | No        | Anadromous spawners (potamodromous in Great Lakes) but no so far no suitable conditions for natural spawning in Europe (Crawford SS, Muir AM (2008) Global introductions of salmon and trout in the genus <i>Oncorhynchus</i> : 1870–2007. Reviews in Fish Biology and Fisheries 18: 313– 344).                        | Very high |
| 41                             | 7.07 | Are propagules or eggs of the taxon likely to be dispersed in the RA area by other animals?                                                                                  | No        | Almost certainly it will not spawn in RA area due to non optimum conditions (Crawford SS, Muir AM (2008) Global introductions of salmon and trout in the genus <i>Oncorhynchus</i> : 1870–2007. Reviews in Fish Biology and Fisheries 18: 313– 344).                                                                   | Very high |
| 42                             | 7.08 | Is dispersal of the taxon along any of the vectors/pathways mentioned in the previous seven questions (35–41; i.e. both unintentional or intentional) likely to be           | Yes       | Introductions                                                                                                                                                                                                                                                                                                          | Medium    |
| 43                             | 7.09 | Is dispersal of the taxon density dependent?                                                                                                                                 | No        | In streams only during spawning and while smoltifying (Froese & Pauly 2020).                                                                                                                                                                                                                                           | Very high |
| <b>8. Tolerance attributes</b> |      |                                                                                                                                                                              |           |                                                                                                                                                                                                                                                                                                                        |           |
| 44                             | 8.01 | Is the taxon able to withstand being out of water for extended periods (e.g. minimum of one or more hours) at some stage of its life cycle?                                  | No        | Probably sensitive as other Salmonids (personal opinion).                                                                                                                                                                                                                                                              | Medium    |
| 45                             | 8.02 | Is the taxon tolerant of a wide range of water quality conditions relevant to that taxon? [In the Justification field, indicate the relevant water quality variable(s) being | No        | CABI 2019                                                                                                                                                                                                                                                                                                              | Very high |
| 46                             | 8.03 | Can the taxon be controlled or eradicated in the wild with chemical, biological, or other agents/means?                                                                      | No        | Not allowed.                                                                                                                                                                                                                                                                                                           | Very high |
| 47                             | 8.04 | Is the taxon likely to tolerate or benefit from environmental/human disturbance?                                                                                             | No        | Needs rivers without obstacles to reach spawning streams (COSEWIC 2006. COSEWIC assessment and status report on the chinook salmon <i>Oncorhynchus tshawytscha</i> (Okanagan population) in Canada. Committee on the Status of Endangered Wildlife in Canada. Ottawa. vii + 41 pp.                                     | Very high |
| 48                             | 8.05 | Is the taxon able to tolerate salinity levels that are higher or lower than those found in its usual environment?                                                            | Yes       | Anadromous species (Froese & Pauly 2020).                                                                                                                                                                                                                                                                              | Very high |
| 49                             | 8.06 | Are there effective natural enemies (predators) of the taxon present in the RA area?                                                                                         | Yes       | Piscivorous fish and birds (Scott, C. 2003. "Oncorhynchus tshawytscha" (On-line), Animal Diversity Web. Accessed April 28, 2020 at <a href="https://animaldiversity.org/accounts/Oncorhynchus_tshawytscha/">https://animaldiversity.org/accounts/Oncorhynchus_tshawytscha/</a> )                                       | Medium    |
| <b>C. Climate change</b>       |      |                                                                                                                                                                              |           |                                                                                                                                                                                                                                                                                                                        |           |
| <b>9. Climate change</b>       |      |                                                                                                                                                                              |           |                                                                                                                                                                                                                                                                                                                        |           |
| 50                             | 9.01 | Under the predicted future climatic conditions, are the risks of entry into the RA area posed by the taxon likely to increase, decrease or not change?                       | No change | Only pathway is introduction by man.                                                                                                                                                                                                                                                                                   | High      |
| 51                             | 9.02 | Under the predicted future climatic conditions, are the risks of establishment posed by the taxon likely to increase, decrease or not change?                                | No change | Almost certainly not able to establish viable population (Crawford SS, Muir AM (2008) Global introductions of salmon and trout in the genus <i>Oncorhynchus</i> : 1870–2007. Reviews in Fish Biology and Fisheries 18: 313– 344), it is a cold water species so no change with climate change.                         | High      |
| 52                             | 9.03 | Under the predicted future climatic conditions, are the risks of dispersal within the RA area posed by the taxon likely to increase, decrease or not change?                 | No change | Almost certainly not able to establish viable population (Crawford SS, Muir AM (2008) Global introductions of salmon and trout in the genus <i>Oncorhynchus</i> : 1870–2007. Reviews in Fish Biology and Fisheries 18: 313– 344), it is a cold water species so no change with climate change.                         | High      |
| 53                             | 9.04 | Under the predicted future climatic conditions, what is the likely magnitude of future potential impacts on biodiversity and/or ecological integrity/status?                 | Lower     | Potential stocked specimens would be stressed under predicted increase in temperature because it is a cold water species (Myrick, C.A., and J.J. Cech, Jr. 2001. Temperature effects on Chinook salmon and steelhead: a review focusing on California's Central Valley populations. Bay-Delta Modeling Forum Technical | High      |
| 54                             | 9.05 | Under the predicted future climatic conditions, what is the likely magnitude of future potential impacts on ecosystem structure and/or function?                             | Lower     | Potential stocked specimens would be stressed under predicted increase in temperature because it is a cold water species (Myrick, C.A., and J.J. Cech, Jr. 2001. Temperature effects on Chinook salmon and steelhead: a review focusing on California's Central Valley populations. Bay-Delta Modeling Forum Technical | High      |
| 55                             | 9.06 | Under the predicted future climatic conditions, what is the likely magnitude of future potential impacts on ecosystem services/socio-economic factors?                       | No change | Predicted impact is not certain even in this conditions so no change.                                                                                                                                                                                                                                                  | Medium    |

| Statistics                                     |             |
|------------------------------------------------|-------------|
| Scores                                         |             |
| <b>BRA</b>                                     | <b>14.0</b> |
| <b>BRA Outcome</b>                             | <b>-</b>    |
| <b>BRA+CCA</b>                                 | <b>10.0</b> |
| <b>BRA+CCA Outcome</b>                         | <b>-</b>    |
| Score partition                                |             |
| <b>A. Biogeography/Historical</b>              | <b>11.0</b> |
| 1. Domestication/Cultivation                   | 4.0         |
| 2. Climate, distribution and introduction risk | 1.0         |
| 3. Invasive elsewhere                          | 6.0         |
| <b>B. Biology/Ecology</b>                      | <b>3.0</b>  |
| 4. Undesirable (or persistence) traits         | 5.0         |
| 5. Resource exploitation                       | 5.0         |
| 6. Reproduction                                | -2.0        |
| 7. Dispersal mechanisms                        | -4.0        |
| 8. Tolerance attributes                        | -1.0        |

|                                                |             |
|------------------------------------------------|-------------|
| <b>C. Climate change</b>                       | <b>-4.0</b> |
| 9. Climate change                              | -4.0        |
| <b>Answered Questions</b>                      |             |
| <b>Total</b>                                   | <b>55</b>   |
| <b>A. Biogeography/Historical</b>              | <b>13</b>   |
| 1. Domestication/Cultivation                   | 3           |
| 2. Climate, distribution and introduction risk | 5           |
| 3. Invasive elsewhere                          | 5           |
| <b>B. Biology/Ecology</b>                      | <b>36</b>   |
| 4. Undesirable (or persistence) traits         | 12          |
| 5. Resource exploitation                       | 2           |
| 6. Reproduction                                | 7           |
| 7. Dispersal mechanisms                        | 9           |
| 8. Tolerance attributes                        | 6           |
| <b>C. Climate change</b>                       | <b>6</b>    |
| 9. Climate change                              | 6           |
| <b>Sectors affected</b>                        |             |
| <b>Commercial</b>                              | <b>9</b>    |
| <b>Environmental</b>                           | <b>2</b>    |
| <b>Species or population nuisance traits</b>   | <b>1</b>    |

|                   |             |
|-------------------|-------------|
| <b>Thresholds</b> |             |
| <b>BRA</b>        | <b>-</b>    |
| <b>BRA+CCA</b>    | <b>-</b>    |
| <b>Confidence</b> |             |
| <b>BRA+CCA</b>    | <b>0.76</b> |
| <b>BRA</b>        | <b>0.77</b> |
| <b>CCA</b>        | <b>0.71</b> |

|                            |  |
|----------------------------|--|
| <b>Date and Time</b>       |  |
| <b>12/05/2021 08:02:54</b> |  |

## AS-ISK v2

| Taxon and Assessor details         |                                         |
|------------------------------------|-----------------------------------------|
| Category                           | Fishes and Lampreys (freshwater)        |
| Taxon name                         | <i>Oncorhynchus tshawytscha</i>         |
| Common name                        | chinook salmon                          |
| Assessor                           | Tamara Kanjuh                           |
| Risk screening context             |                                         |
| Reason and socio-economic benefits |                                         |
| Risk assessment area               | Danube & Adriatic basins BA, HR, ME, RS |
| Taxonomy                           |                                         |
| Native range                       |                                         |
| Introduced range                   |                                         |
| URL                                |                                         |

|                                                |      | Response                                                                                                                                                                | Justification (references and/or other information) | Confidence                                                                                                                                                         |           |
|------------------------------------------------|------|-------------------------------------------------------------------------------------------------------------------------------------------------------------------------|-----------------------------------------------------|--------------------------------------------------------------------------------------------------------------------------------------------------------------------|-----------|
| A. Biogeography/Historical                     |      |                                                                                                                                                                         |                                                     |                                                                                                                                                                    |           |
| 1. Domestication/Cultivation                   |      |                                                                                                                                                                         |                                                     |                                                                                                                                                                    |           |
| 1                                              | 1.01 | Has the taxon been the subject of domestication (or cultivation) for at least 20 generations?                                                                           | Yes                                                 | The world's largest producer and market supplier of the Chinook salmon is New Zealand ("Aquaculture New Zealand Industry Overview". Retrieved September 20, 2011.) | Very high |
| 2                                              | 1.02 | Is the taxon harvested in the wild and likely to be sold or used in its live form?                                                                                      | Yes                                                 | "Fisheries and Aquaculture Department Statistics". Food and Agriculture Organization of the United Nations. Retrieved 2012-09-                                     | Very high |
| 3                                              | 1.03 | Does the taxon have invasive races, varieties, sub-taxa or congeners?                                                                                                   | No                                                  | cabi.org                                                                                                                                                           | High      |
| 2. Climate, distribution and introduction risk |      |                                                                                                                                                                         |                                                     |                                                                                                                                                                    |           |
| 4                                              | 2.01 | How similar are the climatic conditions of the Risk Assessment (RA) area and the taxon's native range?                                                                  | Medium                                              | Dfa, Dfb (Köppen–Geiger climate classification system)                                                                                                             | High      |
| 5                                              | 2.02 | What is the quality of the climate matching data?                                                                                                                       | High                                                | Köppen–Geiger climate classification system                                                                                                                        | High      |
| 6                                              | 2.03 | Is the taxon already present outside of captivity in the RA area?                                                                                                       | Yes                                                 | Document???                                                                                                                                                        | Medium    |
| 7                                              | 2.04 | How many potential vectors could the taxon use to enter in the RA area?                                                                                                 | One                                                 | Intentional stocking, aquaculture                                                                                                                                  | High      |
| 8                                              | 2.05 | Is the taxon currently found in close proximity to, and likely to enter into, the RA area in the near future (e.g. unintentional and intentional introductions)?        | Yes                                                 | Intentional stocking                                                                                                                                               | High      |
| 3. Invasive elsewhere                          |      |                                                                                                                                                                         |                                                     |                                                                                                                                                                    |           |
| 9                                              | 3.01 | Has the taxon become naturalised (established viable populations) outside its                                                                                           | No                                                  | No information found.                                                                                                                                              | High      |
| 10                                             | 3.02 | In the taxon's introduced range, are there known adverse impacts to wild stocks or commercial taxa?                                                                     | Yes                                                 | cabi.org                                                                                                                                                           | High      |
| 11                                             | 3.03 | In the taxon's introduced range, are there known adverse impacts to aquaculture?                                                                                        | No                                                  | cabi.org                                                                                                                                                           | High      |
| 12                                             | 3.04 | In the taxon's introduced range, are there known adverse impacts to ecosystem                                                                                           | No                                                  | cabi.org                                                                                                                                                           | High      |
| 13                                             | 3.05 | In the taxon's introduced range, are there known adverse socio-economic impacts?                                                                                        | No                                                  | cabi.org                                                                                                                                                           | High      |
| B. Biology/Ecology                             |      |                                                                                                                                                                         |                                                     |                                                                                                                                                                    |           |
| 4. Undesirable (or persistence) traits         |      |                                                                                                                                                                         |                                                     |                                                                                                                                                                    |           |
| 14                                             | 4.01 | Is it likely that the taxon will be poisonous or pose other risks to human health?                                                                                      | Yes                                                 | Potential pests (FishBase)                                                                                                                                         | High      |
| 15                                             | 4.02 | Is it likely that the taxon will smother one or more native taxa (that are not threatened or protected)?                                                                | Yes                                                 | cabi.org                                                                                                                                                           | High      |
| 16                                             | 4.03 | Are there any threatened or protected taxa that the non-native taxon would parasitise in the RA area?                                                                   | No                                                  | The taxon is not a parasite.                                                                                                                                       | High      |
| 17                                             | 4.04 | Is the taxon adaptable in terms of climatic and other environmental conditions, thus enhancing its potential persistence if it has invaded or could invade the RA area? | Yes                                                 | cabi.org                                                                                                                                                           | High      |
| 18                                             | 4.05 | Is the taxon likely to disrupt food-web structure/function in aquatic ecosystems if it has invaded or is likely to invade the RA                                        | Yes                                                 | cabi.org                                                                                                                                                           | High      |
| 19                                             | 4.06 | Is the taxon likely to exert adverse impacts on ecosystem services in the RA area?                                                                                      | Yes                                                 | cabi.org                                                                                                                                                           | High      |
| 20                                             | 4.07 | Is it likely that the taxon will host, and/or act as a vector for, recognised pests and infectious agents that are endemic in the RA                                    | No                                                  | No information found.                                                                                                                                              | Low       |
| 21                                             | 4.08 | Is it likely that the taxon will host, and/or act as a vector for, recognised pests and infectious agents that are absent from (novel to) the RA area?                  | Yes                                                 | cabi.org                                                                                                                                                           | High      |
| 22                                             | 4.09 | Is it likely that the taxon will achieve a body size that will make it more likely to be released from captivity?                                                       | No                                                  | Not in captivity.                                                                                                                                                  | High      |
| 23                                             | 4.10 | Is the taxon capable of sustaining itself in a range of water velocity conditions (e.g. versatile in habitat use)?                                                      | Yes                                                 | cabi.org                                                                                                                                                           | High      |
| 24                                             | 4.11 | Is it likely that the taxon's mode of existence (e.g. excretion of by-products) or behaviours (e.g. feeding) will reduce habitat quality for native taxa?               | Yes                                                 | cabi.org                                                                                                                                                           | High      |
| 25                                             | 4.12 | Is the taxon likely to maintain a viable population even when present in low densities (or persisting in adverse conditions by way of a dormant form)?                  | No                                                  | cabi.org                                                                                                                                                           | High      |

|                                 |      |                                                                                                                                                                              |           |                                                                                                                                |        |
|---------------------------------|------|------------------------------------------------------------------------------------------------------------------------------------------------------------------------------|-----------|--------------------------------------------------------------------------------------------------------------------------------|--------|
| <b>5. Resource exploitation</b> |      |                                                                                                                                                                              |           |                                                                                                                                |        |
| 26                              | 5.01 | Is the taxon likely to consume threatened or protected native taxa in the RA area?                                                                                           | Yes       | cabi.org                                                                                                                       | High   |
| 27                              | 5.02 | Is the taxon likely to sequester food resources (including nutrients) to the detriment of native taxa in the RA area?                                                        | Yes       | cabi.org                                                                                                                       | High   |
| <b>6. Reproduction</b>          |      |                                                                                                                                                                              |           |                                                                                                                                |        |
| 28                              | 6.01 | Is the taxon likely to exhibit parental care and/or to reduce age-at-maturity in response to environmental conditions?                                                       | No        | cabi.org                                                                                                                       | High   |
| 29                              | 6.02 | Is the taxon likely to produce viable gametes or propagules (in the RA area)?                                                                                                | No        | No information found.                                                                                                          | Medium |
| 30                              | 6.03 | Is the taxon likely to hybridise naturally with native taxa?                                                                                                                 | No        | cabi.org                                                                                                                       | High   |
| 31                              | 6.04 | Is the taxon likely to be hermaphroditic or to display asexual reproduction?                                                                                                 | Yes       | cabi.org                                                                                                                       | High   |
| 32                              | 6.05 | Is the taxon dependent on the presence of another taxon (or specific habitat features) to complete its life cycle?                                                           | No        | cabi.org                                                                                                                       | High   |
| 33                              | 6.06 | Is the taxon known (or likely) to produce a large number of propagules or offspring within a short time span (e.g. < 1 year)?                                                | Yes       | cabi.org                                                                                                                       | High   |
| 34                              | 6.07 | How many time units (days, months, years) does the taxon require to reach the age-at-first-reproduction?                                                                     | 6         | "CHINOOK SALMON FACTSBlue Face Baby". Pacific States Marine Fisheries Commission. 2010-03-05. Retrieved 2010-03-05. 1996-12-16 | High   |
| <b>7. Dispersal mechanisms</b>  |      |                                                                                                                                                                              |           |                                                                                                                                |        |
| 35                              | 7.01 | How many potential internal vectors/pathways could the taxon use to disperse within the RA area (with suitable                                                               | One       | Intentional stocking.                                                                                                          | High   |
| 36                              | 7.02 | Will any of these vectors/pathways bring the taxon in close proximity to one or more protected areas (e.g. MCZ, MPA, SSSI)?                                                  | Yes       | Intentional stocking.                                                                                                          | High   |
| 37                              | 7.03 | Does the taxon have a means of actively attaching itself to hard substrata (e.g. ship hulls, pilings, buoys) such that it enhances the likelihood of dispersal?              | No        | cabi.org                                                                                                                       | High   |
| 38                              | 7.04 | Is natural dispersal of the taxon likely to occur as eggs (for animals) or as propagules (for plants: seeds, spores) in the RA area?                                         | No        | cabi.org                                                                                                                       | High   |
| 39                              | 7.05 | Is natural dispersal of the taxon likely to occur as larvae/juveniles (for animals) or as fragments/seedlings (for plants) in the RA area?                                   | Yes       | cabi.org                                                                                                                       | High   |
| 40                              | 7.06 | Are older life stages of the taxon likely to migrate in the RA area for reproduction?                                                                                        | Yes       | cabi.org                                                                                                                       | High   |
| 41                              | 7.07 | Are propagules or eggs of the taxon likely to be dispersed in the RA area by other animals?                                                                                  | No        | cabi.org                                                                                                                       | High   |
| 42                              | 7.08 | Is dispersal of the taxon along any of the vectors/pathways mentioned in the previous seven questions (35–41; i.e. both unintentional or intentional) likely to be           | Yes       | Intentional stocking.                                                                                                          | High   |
| 43                              | 7.09 | Is dispersal of the taxon density dependent?                                                                                                                                 | No        | No information found.                                                                                                          | Medium |
| <b>8. Tolerance attributes</b>  |      |                                                                                                                                                                              |           |                                                                                                                                |        |
| 44                              | 8.01 | Is the taxon able to withstand being out of water for extended periods (e.g. minimum of one or more hours) at some stage of its life cycle?                                  | No        | cabi.org                                                                                                                       | High   |
| 45                              | 8.02 | Is the taxon tolerant of a wide range of water quality conditions relevant to that taxon? [In the Justification field, indicate the relevant water quality variable(s) being | Yes       | cabi.org                                                                                                                       | High   |
| 46                              | 8.03 | Can the taxon be controlled or eradicated in the wild with chemical, biological, or other agents/means?                                                                      | No        | No information found.                                                                                                          | Medium |
| 47                              | 8.04 | Is the taxon likely to tolerate or benefit from environmental/human disturbance?                                                                                             | Yes       | cabi.org                                                                                                                       | High   |
| 48                              | 8.05 | Is the taxon able to tolerate salinity levels that are higher or lower than those found in its usual environment?                                                            | Yes       | cabi.org                                                                                                                       | High   |
| 49                              | 8.06 | Are there effective natural enemies (predators) of the taxon present in the RA                                                                                               | Yes       | cabi.org                                                                                                                       | High   |
| <b>C. Climate change</b>        |      |                                                                                                                                                                              |           |                                                                                                                                |        |
| <b>9. Climate change</b>        |      |                                                                                                                                                                              |           |                                                                                                                                |        |
| 50                              | 9.01 | Under the predicted future climatic conditions, are the risks of entry into the RA area posed by the taxon likely to increase, decrease or not change?                       | No change | cabi.org                                                                                                                       | High   |
| 51                              | 9.02 | Under the predicted future climatic conditions, are the risks of establishment posed by the taxon likely to increase, decrease or not change?                                | No change | cabi.org                                                                                                                       | High   |
| 52                              | 9.03 | Under the predicted future climatic conditions, are the risks of dispersal within the RA area posed by the taxon likely to increase, decrease or not change?                 | No change | cabi.org                                                                                                                       | High   |
| 53                              | 9.04 | Under the predicted future climatic conditions, what is the likely magnitude of future potential impacts on biodiversity and/or ecological integrity/status?                 | No change | cabi.org                                                                                                                       | High   |



|    |      |                                                                                                                                                        |           |          |      |
|----|------|--------------------------------------------------------------------------------------------------------------------------------------------------------|-----------|----------|------|
| 54 | 9.05 | Under the predicted future climatic conditions, what is the likely magnitude of future potential impacts on ecosystem structure and/or function?       | No change | cabi.org | High |
| 55 | 9.06 | Under the predicted future climatic conditions, what is the likely magnitude of future potential impacts on ecosystem services/socio-economic factors? | No change | cabi.org | High |

| Statistics                                     |             |
|------------------------------------------------|-------------|
| Scores                                         |             |
| <b>BRA</b>                                     | <b>25.0</b> |
| <b>BRA Outcome</b>                             | <b>-</b>    |
| <b>BRA+CCA</b>                                 | <b>25.0</b> |
| <b>BRA+CCA Outcome</b>                         | <b>-</b>    |
| Score partition                                |             |
| <b>A. Biogeography/Historical</b>              | <b>3.0</b>  |
| 1. Domestication/Cultivation                   | 2.0         |
| 2. Climate, distribution and introduction risk | 1.0         |
| 3. Invasive elsewhere                          | 0.0         |
| <b>B. Biology/Ecology</b>                      | <b>22.0</b> |
| 4. Undesirable (or persistence) traits         | 8.0         |
| 5. Resource exploitation                       | 7.0         |
| 6. Reproduction                                | 1.0         |
| 7. Dispersal mechanisms                        | 1.0         |
| 8. Tolerance attributes                        | 5.0         |
| <b>C. Climate change</b>                       | <b>0.0</b>  |
| 9. Climate change                              | 0.0         |
| Answered Questions                             |             |
| <b>Total</b>                                   | <b>55</b>   |
| <b>A. Biogeography/Historical</b>              | <b>13</b>   |
| 1. Domestication/Cultivation                   | 3           |
| 2. Climate, distribution and introduction risk | 5           |
| 3. Invasive elsewhere                          | 5           |
| <b>B. Biology/Ecology</b>                      | <b>36</b>   |
| 4. Undesirable (or persistence) traits         | 12          |
| 5. Resource exploitation                       | 2           |
| 6. Reproduction                                | 7           |
| 7. Dispersal mechanisms                        | 9           |
| 8. Tolerance attributes                        | 6           |
| <b>C. Climate change</b>                       | <b>6</b>    |
| 9. Climate change                              | 6           |
| Sectors affected                               |             |
| <b>Commercial</b>                              | <b>7</b>    |
| <b>Environmental</b>                           | <b>9</b>    |
| <b>Species or population nuisance traits</b>   | <b>12</b>   |

| Thresholds     |             |
|----------------|-------------|
| <b>BRA</b>     | <b>-</b>    |
| <b>BRA+CCA</b> | <b>-</b>    |
| Confidence     |             |
| <b>BRA+CCA</b> | <b>0.73</b> |
| <b>BRA</b>     | <b>0.73</b> |
| <b>CCA</b>     | <b>0.75</b> |

| Date and Time       |  |
|---------------------|--|
| 03/06/2021 13:06:30 |  |

AS-ISK v2

| Taxon and Assessor details         |                                         |
|------------------------------------|-----------------------------------------|
| Category                           | Fishes and Lampreys (freshwater)        |
| Taxon name                         | <i>Oncorhynchus tshawytscha</i>         |
| Common name                        | chinook salmon                          |
| Assessor                           | Tena Radocaj                            |
| Risk screening context             |                                         |
| Reason and socio-economic benefits |                                         |
| Risk assessment area               | Danube & Adriatic basins BA, HR, ME, RS |
| Taxonomy                           |                                         |
| Native range                       |                                         |
| Introduced range                   |                                         |
| URL                                |                                         |

|                                                |      | Response                                                                                                                                                                | Justification (references and/or other information) | Confidence                                                                                                                                                                                                                                                                                                                                                                                                                               |        |
|------------------------------------------------|------|-------------------------------------------------------------------------------------------------------------------------------------------------------------------------|-----------------------------------------------------|------------------------------------------------------------------------------------------------------------------------------------------------------------------------------------------------------------------------------------------------------------------------------------------------------------------------------------------------------------------------------------------------------------------------------------------|--------|
| A. Biogeography/Historical                     |      |                                                                                                                                                                         |                                                     |                                                                                                                                                                                                                                                                                                                                                                                                                                          |        |
| 1. Domestication/Cultivation                   |      |                                                                                                                                                                         |                                                     |                                                                                                                                                                                                                                                                                                                                                                                                                                          |        |
| 1                                              | 1.01 | Has the taxon been the subject of domestication (or cultivation) for at least 20 generations?                                                                           | Yes                                                 | Species Fact Sheet: <i>Oncorhynchus tshawytscha</i> (Walbaum, 1792). FAO. Archived from the original on 3 April 2020.                                                                                                                                                                                                                                                                                                                    | Medium |
| 2                                              | 1.02 | Is the taxon harvested in the wild and likely to be sold or used in its live form?                                                                                      | No                                                  | Personal opinion                                                                                                                                                                                                                                                                                                                                                                                                                         | Low    |
| 3                                              | 1.03 | Does the taxon have invasive races, varieties, sub-taxa or congeners?                                                                                                   | Yes                                                 | <i>Oncorhynchus mykiss</i> (CABI 2019).                                                                                                                                                                                                                                                                                                                                                                                                  | Medium |
| 2. Climate, distribution and introduction risk |      |                                                                                                                                                                         |                                                     |                                                                                                                                                                                                                                                                                                                                                                                                                                          |        |
| 4                                              | 2.01 | How similar are the climatic conditions of the Risk Assessment (RA) area and the taxon's native range?                                                                  | High                                                | The similarity between climatic conditions RA area and native range is high. I use climatch.                                                                                                                                                                                                                                                                                                                                             | Medium |
| 5                                              | 2.02 | What is the quality of the climate matching data?                                                                                                                       | Medium                                              | The quality of the climate matching data is medium.                                                                                                                                                                                                                                                                                                                                                                                      | Medium |
| 6                                              | 2.03 | Is the taxon already present outside of captivity in the RA area?                                                                                                       | No                                                  | Chinook salmon is not present outside of captivity in the RA area                                                                                                                                                                                                                                                                                                                                                                        | High   |
| 7                                              | 2.04 | How many potential vectors could the taxon use to enter in the RA area?                                                                                                 | >1                                                  | Escape from aquaculture, introduced for angling (CABI 2019)                                                                                                                                                                                                                                                                                                                                                                              | Medium |
| 8                                              | 2.05 | Is the taxon currently found in close proximity to, and likely to enter into, the RA area in the near future (e.g. unintentional and intentional introductions)?        | No                                                  | Chinook salmon not established in Europe (Froese & Pauly 2020).                                                                                                                                                                                                                                                                                                                                                                          | Medium |
| 3. Invasive elsewhere                          |      |                                                                                                                                                                         |                                                     |                                                                                                                                                                                                                                                                                                                                                                                                                                          |        |
| 9                                              | 3.01 | Has the taxon become naturalised (established viable populations) outside its native range?                                                                             | Yes                                                 | Fuller, P., G. Jacobs, M. Cannister, J. Larson, and A. Fusaro, 2020, <i>Oncorhynchus tshawytscha</i> (Walbaum in Artdi, 1792): U.S. Geological Survey, Nonindigenous Aquatic Species Database, Gainesville, FL, <a href="https://nas.er.usgs.gov/queries/FactSheet.aspx?speciesID=920">https://nas.er.usgs.gov/queries/FactSheet.aspx?speciesID=920</a> , Revision Date: 12/20/2019, Peer Review Date: 6/26/2014, Access Date: 5/18/2020 | Medium |
| 10                                             | 3.02 | In the taxon's introduced range, are there known adverse impacts to wild stocks or commercial taxa?                                                                     | Yes                                                 | Fuller, P., G. Jacobs, M. Cannister, J. Larson, and A. Fusaro, 2020, <i>Oncorhynchus tshawytscha</i> (Walbaum in Artdi, 1792): U.S. Geological Survey, Nonindigenous Aquatic Species Database, Gainesville, FL, <a href="https://nas.er.usgs.gov/queries/FactSheet.aspx?speciesID=920">https://nas.er.usgs.gov/queries/FactSheet.aspx?speciesID=920</a> , Revision Date: 12/20/2019, Peer Review Date: 6/26/2014, Access Date: 5/18/2020 | Medium |
| 11                                             | 3.03 | In the taxon's introduced range, are there known adverse impacts to aquaculture?                                                                                        | No                                                  | Farmed and no adverse impacts (Species Fact Sheet: <i>Oncorhynchus tshawytscha</i> (Walbaum, 1792). FAO. Archived from the original on 3 April 2020.).                                                                                                                                                                                                                                                                                   | Low    |
| 12                                             | 3.04 | In the taxon's introduced range, are there known adverse impacts to ecosystem                                                                                           | No                                                  | no data available                                                                                                                                                                                                                                                                                                                                                                                                                        | Low    |
| 13                                             | 3.05 | In the taxon's introduced range, are there known adverse socio-economic impacts?                                                                                        | No                                                  | Personal opinion                                                                                                                                                                                                                                                                                                                                                                                                                         | Low    |
| B. Biology/Ecology                             |      |                                                                                                                                                                         |                                                     |                                                                                                                                                                                                                                                                                                                                                                                                                                          |        |
| 4. Undesirable (or persistence) traits         |      |                                                                                                                                                                         |                                                     |                                                                                                                                                                                                                                                                                                                                                                                                                                          |        |
| 14                                             | 4.01 | Is it likely that the taxon will be poisonous or pose other risks to human health?                                                                                      | No                                                  | Chinook salmon is harmless (Fishbase)                                                                                                                                                                                                                                                                                                                                                                                                    | Medium |
| 15                                             | 4.02 | Is it likely that the taxon will smother one or more native taxa (that are not threatened or protected)?                                                                | Yes                                                 | Fuller, P., G. Jacobs, M. Cannister, J. Larson, and A. Fusaro, 2020, <i>Oncorhynchus tshawytscha</i> (Walbaum in Artdi, 1792): U.S. Geological Survey, Nonindigenous Aquatic Species Database, Gainesville, FL, <a href="https://nas.er.usgs.gov/queries/FactSheet.aspx?speciesID=920">https://nas.er.usgs.gov/queries/FactSheet.aspx?speciesID=920</a> , Revision Date: 12/20/2019, Peer Review Date: 6/26/2014, Access Date: 5/18/2020 | Medium |
| 16                                             | 4.03 | Are there any threatened or protected taxa that the non-native taxon would parasitise in the RA area?                                                                   | No                                                  | No                                                                                                                                                                                                                                                                                                                                                                                                                                       | Low    |
| 17                                             | 4.04 | Is the taxon adaptable in terms of climatic and other environmental conditions, thus enhancing its potential persistence if it has invaded or could invade the RA area? | No                                                  | The freshwater streams are relatively deep with coarse gravel. The water must be cool, under 14 C for maximum survival, and fast flowing (Scott, C. 2003. " <i>Oncorhynchus tshawytscha</i> " (On-line), Animal Diversity Web. Accessed May, 18, 2020 at <a href="https://animaldiversity.org/accounts/Oncorhynchus_tshawytscha/">https://animaldiversity.org/accounts/Oncorhynchus_tshawytscha/</a> )                                   | Medium |
| 18                                             | 4.05 | Is the taxon likely to disrupt food-web structure/function in aquatic ecosystems if it has invaded or is likely to invade the RA                                        | No                                                  | The taxon can will is no effect on the food-web structure/function in the aquatic ecosystem.                                                                                                                                                                                                                                                                                                                                             | Low    |
| 19                                             | 4.06 | Is the taxon likely to exert adverse impacts on ecosystem services in the RA area?                                                                                      | Yes                                                 | The taxon will not have an adverse impact on ecosystem services in the RA area.                                                                                                                                                                                                                                                                                                                                                          | Low    |
| 20                                             | 4.07 | Is it likely that the taxon will host, and/or act as a vector for, recognised pests and infectious agents that are endemic in the RA                                    | Yes                                                 | Yes, the taxon may be a host or vector of known pests and infectious agents endemic to RA area. Because in every area exist infectious agents and pests.                                                                                                                                                                                                                                                                                 | Medium |

|                                 |      |                                                                                                                                                                              |                |                                                                                                                                                                                                                                                                                                                                     |           |
|---------------------------------|------|------------------------------------------------------------------------------------------------------------------------------------------------------------------------------|----------------|-------------------------------------------------------------------------------------------------------------------------------------------------------------------------------------------------------------------------------------------------------------------------------------------------------------------------------------|-----------|
| 21                              | 4.08 | Is it likely that the taxon will host, and/or act as a vector for, recognised pests and infectious agents that are absent from (novel to) the RA area?                       | Yes            | Rauque, C., Viozzi, G., Flores, V., Vega, R., Waicheim, A., & Salgado-Maldonado, G. (2018). Helminth parasites of alien freshwater fishes in Patagonia (Argentina). <i>International journal for parasitology. Parasites and wildlife</i> , 7(3), 369–379                                                                           | Medium    |
| 22                              | 4.09 | Is it likely that the taxon will achieve a body size that will make it more likely to be released from captivity?                                                            | Yes            | Max length : 150 cm TL (Fishbase)                                                                                                                                                                                                                                                                                                   | Medium    |
| 23                              | 4.10 | Is the taxon capable of sustaining itself in a range of water velocity conditions (e.g. versatile in habitat use)?                                                           | Yes            | Froese & Pauly 2020                                                                                                                                                                                                                                                                                                                 | Medium    |
| 24                              | 4.11 | Is it likely that the taxon's mode of existence (e.g. excretion of by-products) or behaviours (e.g. feeding) will reduce habitat quality for native taxa?                    | No             | Supply of marine derived nutrients to headwaters (Soto D, Arismendi I, Di Prinzio C, Jara F (2007) Establishment of Chinook Salmon ( <i>Oncorhynchus tshawytscha</i> ) in Pacific basins of Southern South America and its potential ecosystem implications. <i>Rev Chil Hist Nat</i> 80:81–98                                      | Medium    |
| 25                              | 4.12 | Is the taxon likely to maintain a viable population even when present in low densities (or persisting in adverse conditions by way of a dormant form)?                       | No             | Establishments of populations in new areas are very rare (CABI 2019).                                                                                                                                                                                                                                                               | Medium    |
| <b>5. Resource exploitation</b> |      |                                                                                                                                                                              |                |                                                                                                                                                                                                                                                                                                                                     |           |
| 26                              | 5.01 | Is the taxon likely to consume threatened or protected native taxa in the RA area?                                                                                           | Yes            | It is possible that it consume endangered and protected native taxa in the RA area. If there are protected taxa in the RA area will consume them, whether or not the taxon is endangered.                                                                                                                                           | Medium    |
| 27                              | 5.02 | Is the taxon likely to sequester food resources (including nutrients) to the detriment of native taxa in the RA area?                                                        | Not applicable | not applicable                                                                                                                                                                                                                                                                                                                      | Very high |
| <b>6. Reproduction</b>          |      |                                                                                                                                                                              |                |                                                                                                                                                                                                                                                                                                                                     |           |
| 28                              | 6.01 | Is the taxon likely to exhibit parental care and/or to reduce age-at-maturity in response to environmental conditions?                                                       | No             | Froese & Pauly 2020                                                                                                                                                                                                                                                                                                                 | Medium    |
| 29                              | 6.02 | Is the taxon likely to produce viable gametes or propagules (in the RA area)?                                                                                                | No             | Chinook salmon can't produce viable gametes in the RA area. (Crawford SS, Muir AM (2008) Global introductions of salmon and trout in the genus <i>Oncorhynchus</i> : 1870–2007. <i>Reviews in Fish Biology and Fisheries</i> 18: 313– 344)                                                                                          | Medium    |
| 30                              | 6.03 | Is the taxon likely to hybridise naturally with native taxa?                                                                                                                 | No             | No                                                                                                                                                                                                                                                                                                                                  | Low       |
| 31                              | 6.04 | Is the taxon likely to be hermaphroditic or to display asexual reproduction?                                                                                                 | No             | No                                                                                                                                                                                                                                                                                                                                  | Low       |
| 32                              | 6.05 | Is the taxon dependent on the presence of another taxon (or specific habitat features) to complete its life cycle?                                                           | Yes            | Walbaum in Artedi, 1792): U.S. Geological Survey, Nonindigenous Aquatic Species Database, Gainesville, FL, <a href="https://nas.er.usgs.gov/queries/FactSheet.aspx?speciesID=920">https://nas.er.usgs.gov/queries/FactSheet.aspx?speciesID=920</a> , Revision Date: 12/20/2019, Peer Review Date: 6/26/2014, Access Date: 5/18/2020 | Medium    |
| 33                              | 6.06 | Is the taxon known (or likely) to produce a large number of propagules or offspring within a short time span (e.g. < 1 year)?                                                | Yes            | Froese & Pauly 2020                                                                                                                                                                                                                                                                                                                 | Medium    |
| 34                              | 6.07 | How many time units (days, months, years) does the taxon require to reach the age-at-first-reproduction?                                                                     | 2              | Spawns for the first time at 2-7 years. (Froese & Pauly 2020)                                                                                                                                                                                                                                                                       | Medium    |
| <b>7. Dispersal mechanisms</b>  |      |                                                                                                                                                                              |                |                                                                                                                                                                                                                                                                                                                                     |           |
| 35                              | 7.01 | How many potential internal vectors/pathways could the taxon use to disperse within the RA area (with suitable vectors/pathways)?                                            | One            | Fishing (CABI, 2019)                                                                                                                                                                                                                                                                                                                | Medium    |
| 36                              | 7.02 | Will any of these vectors/pathways bring the taxon in close proximity to one or more protected areas (e.g. MCZ, MPA, SSSI)?                                                  | No             | That vector/pathway can't bring taxon in protected area.                                                                                                                                                                                                                                                                            | Medium    |
| 37                              | 7.03 | Does the taxon have a means of actively attaching itself to hard substrata (e.g. ship hulls, pilings, buoys) such that it enhances the likelihood of dispersal?              | No             | No adaptations                                                                                                                                                                                                                                                                                                                      | Low       |
| 38                              | 7.04 | Is natural dispersal of the taxon likely to occur as eggs (for animals) or as propagules (for plants: seeds, spores) in the RA area?                                         | No             | Crawford SS, Muir AM (2008) Global introductions of salmon and trout in the genus <i>Oncorhynchus</i> : 1870–2007. <i>Reviews in Fish Biology and Fisheries</i> 18: 313– 344                                                                                                                                                        | Medium    |
| 39                              | 7.05 | Is natural dispersal of the taxon likely to occur as larvae/juveniles (for animals) or as fragments/seedlings (for plants) in the RA area?                                   | No             | Crawford SS, Muir AM (2008) Global introductions of salmon and trout in the genus <i>Oncorhynchus</i> : 1870–2007. <i>Reviews in Fish Biology and Fisheries</i> 18: 313– 344                                                                                                                                                        | Medium    |
| 40                              | 7.06 | Are older life stages of the taxon likely to migrate in the RA area for reproduction?                                                                                        | No             | Crawford SS, Muir AM (2008) Global introductions of salmon and trout in the genus <i>Oncorhynchus</i> : 1870–2007. <i>Reviews in Fish Biology and Fisheries</i> 18: 313– 344                                                                                                                                                        | Medium    |
| 41                              | 7.07 | Are propagules or eggs of the taxon likely to be dispersed in the RA area by other animals?                                                                                  | No             | Crawford SS, Muir AM (2008) Global introductions of salmon and trout in the genus <i>Oncorhynchus</i> : 1870–2007. <i>Reviews in Fish Biology and Fisheries</i> 18: 313– 344                                                                                                                                                        | Medium    |
| 42                              | 7.08 | Is dispersal of the taxon along any of the vectors/pathways mentioned in the previous seven questions (35–41; i.e. both unintentional or intentional) likely to be?          | Yes            | There is a possibility of a high rate of spread of taxa. Eg. if a fertilized individual enters a new area by any means of expansion.                                                                                                                                                                                                | Low       |
| 43                              | 7.09 | Is dispersal of the taxon density dependent?                                                                                                                                 | No             | Personal opinion                                                                                                                                                                                                                                                                                                                    | Medium    |
| <b>8. Tolerance attributes</b>  |      |                                                                                                                                                                              |                |                                                                                                                                                                                                                                                                                                                                     |           |
| 44                              | 8.01 | Is the taxon able to withstand being out of water for extended periods (e.g. minimum of one or more hours) at some stage of its life cycle?                                  | No             | Personal opinion                                                                                                                                                                                                                                                                                                                    | Medium    |
| 45                              | 8.02 | Is the taxon tolerant of a wide range of water quality conditions relevant to that taxon? [In the Justification field, indicate the relevant water quality variable(s) being | No             | Personal opinion                                                                                                                                                                                                                                                                                                                    | Medium    |
| 46                              | 8.03 | Can the taxon be controlled or eradicated in the wild with chemical, biological, or other agents/means?                                                                      | Not applicable | It is not regulated in Croatia                                                                                                                                                                                                                                                                                                      | Very high |

|                          |      |                                                                                                                                                              |           |                                                                                                                                                                                                                                     |        |
|--------------------------|------|--------------------------------------------------------------------------------------------------------------------------------------------------------------|-----------|-------------------------------------------------------------------------------------------------------------------------------------------------------------------------------------------------------------------------------------|--------|
| 47                       | 8.04 | Is the taxon likely to tolerate or benefit from environmental/human disturbance?                                                                             | No        | COSEWIC 2006. COSEWIC assessment and status report on the chinook salmon <i>Oncorhynchus tshawytscha</i> (Okanagan population) in Canada. Committee on the Status of Endangered Wildlife in Canada. Ottawa. vii + 41 pp.            | Medium |
| 48                       | 8.05 | Is the taxon able to tolerate salinity levels that are higher or lower than those found in its usual environment?                                            | Yes       | Anadromous species (Froese & Pauly 2020)                                                                                                                                                                                            | Medium |
| 49                       | 8.06 | Are there effective natural enemies (predators) of the taxon present in the RA                                                                               | Yes       | Piscivorous fish and birds                                                                                                                                                                                                          | Medium |
| <b>C. Climate change</b> |      |                                                                                                                                                              |           |                                                                                                                                                                                                                                     |        |
| <b>9. Climate change</b> |      |                                                                                                                                                              |           |                                                                                                                                                                                                                                     |        |
| 50                       | 9.01 | Under the predicted future climatic conditions, are the risks of entry into the RA area posed by the taxon likely to increase, decrease or not change?       | No change | The risks of entry into the RA area is no change. Maybe because of human impact, but not because of climate change.                                                                                                                 | Medium |
| 51                       | 9.02 | Under the predicted future climatic conditions, are the risks of establishment posed by the taxon likely to increase, decrease or not change?                | No change | Crawford SS, Muir AM (2008) Global introductions of salmon and trout in the genus <i>Oncorhynchus</i> : 1870–2007. Reviews in Fish Biology and Fisheries 18: 313– 344), it is a cold water species so no change with climate change | Medium |
| 52                       | 9.03 | Under the predicted future climatic conditions, are the risks of dispersal within the RA area posed by the taxon likely to increase, decrease or not change? | No change | Crawford SS, Muir AM (2008) Global introductions of salmon and trout in the genus <i>Oncorhynchus</i> : 1870–2007. Reviews in Fish Biology and Fisheries 18: 313– 344), it is a cold water species so no change with climate change | Medium |
| 53                       | 9.04 | Under the predicted future climatic conditions, what is the likely magnitude of future potential impacts on biodiversity and/or ecological integrity/status? | No change | Future potential impacts on biodiversity and ecological status will not change.                                                                                                                                                     | Medium |
| 54                       | 9.05 | Under the predicted future climatic conditions, what is the likely magnitude of future potential impacts on ecosystem structure and/or function?             | No change | The future potential impacts on ecosystem structure and function will not change.                                                                                                                                                   | Medium |
| 55                       | 9.06 | Under the predicted future climatic conditions, what is the likely magnitude of future potential impacts on ecosystem services/socio-economic factors?       | No change | The future potential impacts on ecosystem services and socio-economic factors will not change.                                                                                                                                      | Medium |

| Statistics                                     |             |
|------------------------------------------------|-------------|
| Scores                                         |             |
| <b>BRA</b>                                     | <b>12.0</b> |
| <b>BRA Outcome</b>                             | <b>-</b>    |
| <b>BRA+CCA</b>                                 | <b>12.0</b> |
| <b>BRA+CCA Outcome</b>                         | <b>-</b>    |
| Score partition                                |             |
| <b>A. Biogeography/Historical</b>              | <b>9.0</b>  |
| 1. Domestication/Cultivation                   | 2.0         |
| 2. Climate, distribution and introduction risk | 1.0         |
| 3. Invasive elsewhere                          | 6.0         |
| <b>B. Biology/Ecology</b>                      | <b>3.0</b>  |
| 4. Undesirable (or persistence) traits         | 5.0         |
| 5. Resource exploitation                       | 5.0         |
| 6. Reproduction                                | -2.0        |
| 7. Dispersal mechanisms                        | -4.0        |
| 8. Tolerance attributes                        | -1.0        |
| <b>C. Climate change</b>                       | <b>0.0</b>  |
| 9. Climate change                              | 0.0         |
| Answered Questions                             |             |
| <b>Total</b>                                   | <b>55</b>   |
| <b>A. Biogeography/Historical</b>              | <b>13</b>   |
| 1. Domestication/Cultivation                   | 3           |
| 2. Climate, distribution and introduction risk | 5           |
| 3. Invasive elsewhere                          | 5           |
| <b>B. Biology/Ecology</b>                      | <b>36</b>   |
| 4. Undesirable (or persistence) traits         | 12          |
| 5. Resource exploitation                       | 2           |
| 6. Reproduction                                | 7           |
| 7. Dispersal mechanisms                        | 9           |
| 8. Tolerance attributes                        | 6           |
| <b>C. Climate change</b>                       | <b>6</b>    |
| 9. Climate change                              | 6           |
| Sectors affected                               |             |
| <b>Commercial</b>                              | <b>7</b>    |
| <b>Environmental</b>                           | <b>6</b>    |
| <b>Species or population nuisance traits</b>   | <b>1</b>    |

| Thresholds     |             |
|----------------|-------------|
| <b>BRA</b>     | <b>-</b>    |
| <b>BRA+CCA</b> | <b>-</b>    |
| Confidence     |             |
| <b>BRA+CCA</b> | <b>0.47</b> |
| <b>BRA</b>     | <b>0.47</b> |
| <b>CCA</b>     | <b>0.50</b> |

| Date and Time       |  |
|---------------------|--|
| 18/05/2020 08:05:37 |  |

## AS-ISK v2

| Taxon and Assessor details         |                                         |
|------------------------------------|-----------------------------------------|
| Category                           | Fishes and Lampreys (freshwater)        |
| Taxon name                         | <i>Salmo labrax</i>                     |
| Common name                        | Black Sea salmon                        |
| Assessor                           | Ana Marić                               |
| Risk screening context             |                                         |
| Reason and socio-economic benefits |                                         |
| Risk assessment area               | Danube & Adriatic basins BA, HR, ME, RS |
| Taxonomy                           |                                         |
| Native range                       |                                         |
| Introduced range                   |                                         |
| URL                                |                                         |

|                                                |      | Response                                                                                                                                                                | Justification (references and/or other information) | Confidence                                                                                                                                                                                                                                                                                                                                                                                                                                                                                                                                                                                                                                                                                 |           |
|------------------------------------------------|------|-------------------------------------------------------------------------------------------------------------------------------------------------------------------------|-----------------------------------------------------|--------------------------------------------------------------------------------------------------------------------------------------------------------------------------------------------------------------------------------------------------------------------------------------------------------------------------------------------------------------------------------------------------------------------------------------------------------------------------------------------------------------------------------------------------------------------------------------------------------------------------------------------------------------------------------------------|-----------|
| A. Biogeography/Historical                     |      |                                                                                                                                                                         |                                                     |                                                                                                                                                                                                                                                                                                                                                                                                                                                                                                                                                                                                                                                                                            |           |
| 1. Domestication/Cultivation                   |      |                                                                                                                                                                         |                                                     |                                                                                                                                                                                                                                                                                                                                                                                                                                                                                                                                                                                                                                                                                            |           |
| 1                                              | 1.01 | Has the taxon been the subject of domestication (or cultivation) for at least 20 generations?                                                                           | Yes                                                 | 1. <a href="http://aquatres.scientificwebjournals.com/en/download/article-file/1265953">http://aquatres.scientificwebjournals.com/en/download/article-file/1265953</a> . Chemical composition of the Black Sea trout ( <i>Salmo labrax</i> Pallas, 1814): A comparative study. 2020. Ekrem Cem Çankırılıgil , Nermin Berik, 2. Variation in the Timing of Spawning of the Black Sea Brown Trout <i>Salmo trutta labrax</i> Pallas under Artificial and Natural Conditions. 2011. A. A. Makhrova, V. S. Artamonovaa, V. S. Sumarokovb, A. N. Pashkovb, S. I. Reshetnikovb. M. V. Ganchenkoc. and S. A. Kulvand                                                                              | High      |
| 2                                              | 1.02 | Is the taxon harvested in the wild and likely to be sold or used in its live form?                                                                                      | Yes                                                 | Naredbao merama za ocuvanje i zastitu ribljeg fonda. 2009.                                                                                                                                                                                                                                                                                                                                                                                                                                                                                                                                                                                                                                 | High      |
| 3                                              | 1.03 | Does the taxon have invasive races, varieties, sub-taxa or congeners?                                                                                                   | Yes                                                 | A handbook of freshwater invasive species. Robert A. Francis. 2012.                                                                                                                                                                                                                                                                                                                                                                                                                                                                                                                                                                                                                        | Very high |
| 2. Climate, distribution and introduction risk |      |                                                                                                                                                                         |                                                     |                                                                                                                                                                                                                                                                                                                                                                                                                                                                                                                                                                                                                                                                                            |           |
| 4                                              | 2.01 | How similar are the climatic conditions of the Risk Assessment (RA) area and the taxon's native range?                                                                  | High                                                | Dfb.. KG climate                                                                                                                                                                                                                                                                                                                                                                                                                                                                                                                                                                                                                                                                           | Very high |
| 5                                              | 2.02 | What is the quality of the climate matching data?                                                                                                                       | High                                                | <a href="https://climatch.cp1.agriculture.gov.au/climatch.jsp">https://climatch.cp1.agriculture.gov.au/climatch.jsp</a> 4 light green                                                                                                                                                                                                                                                                                                                                                                                                                                                                                                                                                      | High      |
| 6                                              | 2.03 | Is the taxon already present outside of captivity in the RA area?                                                                                                       | Yes                                                 | DIVERSITY OF BROWN TROUT, SALMO TRUTTA (ACTINOPTERYGII: SALMONIFORMES: SALMONIDAE), IN THE DANUBE RIVER BASIN OF CROATIA REVEALED BY MITOCHONDRIAL DNA Tamara KANJUH 1*, Ana MARIĆ1, Marina PIRIA2, Ivan ŠPELIĆ2, Ivana MAGUIRE3, and Predrag SIMONOVIĆ. The taxon is not in captivity, but yet not in Adriatic basin in RA area.                                                                                                                                                                                                                                                                                                                                                          | High      |
| 7                                              | 2.04 | How many potential vectors could the taxon use to enter in the RA area?                                                                                                 | One                                                 | Intentional unprofessional stocking.                                                                                                                                                                                                                                                                                                                                                                                                                                                                                                                                                                                                                                                       | High      |
| 8                                              | 2.05 | Is the taxon currently found in close proximity to, and likely to enter into, the RA area in the near future (e.g. unintentional and intentional introductions)?        | Yes                                                 | BROWN TROUT'S POPULATIONS GENETIC DIVERSITY USING MITOCHONDRIAL MARKERS IN RELATIVELY SIMILAR GEOGRAPHICAL AND ECOLOGICAL CONDITIONS – A CARPATHIAN CASE STUDY Gina-Oana POPA *, Miad KHALAF **, Andreea DUDU ***, Angela CURTEAN-BĂNĂDUC ****, Doru BĂNĂDUC *****, Sergiu Emil GEORGESCU ***** and Marieta COSTACHE***** 2013.                                                                                                                                                                                                                                                                                                                                                            | Very high |
| 3. Invasive elsewhere                          |      |                                                                                                                                                                         |                                                     |                                                                                                                                                                                                                                                                                                                                                                                                                                                                                                                                                                                                                                                                                            |           |
| 9                                              | 3.01 | Has the taxon become naturalised (established viable populations) outside its native range?                                                                             | Yes                                                 | Genetic variation among trout in the River Neretva basin, Bosnia and Herzegovina 2006. A. RAZPET, S. SUS` NIK, T. JUG AND A. SNOJ* Diversity of Brown trout <i>Salmo cf. trutta</i> in the River Danube Basin of Western Balkans as Assessed from the Structure of Their Mitochondrial Control Region Haplotypes1 2017. P. Simonovića, *, A. Tošića, D. Škraba Jurlinaa, V. Nikolića, M. Piriab, T. Tomljanovića. N. Špremb. D. Mrdaka. D. Milošević. A. Kottelat, M. and J. Freyhof, 2007. Handbook of European freshwater fishes. Publications Kottelat, Cornol and Freyhof, Berlin. 646 pp. <a href="https://www.fishbase.de/summary/Salmo-">https://www.fishbase.de/summary/Salmo-</a> | High      |
| 10                                             | 3.02 | In the taxon's introduced range, are there known adverse impacts to wild stocks or commercial taxa?                                                                     | No                                                  | <a href="https://www.fishbase.de/summary/Salmo-labrax.html">https://www.fishbase.de/summary/Salmo-labrax.html</a> Kottelat, M. and J. Freyhof, 2007. Handbook of European freshwater fishes. Publications Kottelat, Cornol and Freyhof, Berlin. 646 pp.                                                                                                                                                                                                                                                                                                                                                                                                                                    | High      |
| 11                                             | 3.03 | In the taxon's introduced range, are there known adverse impacts to aquaculture?                                                                                        | No                                                  | <a href="https://www.fishbase.de/summary/Salmo-labrax.html">https://www.fishbase.de/summary/Salmo-labrax.html</a> Kottelat, M. and J. Freyhof, 2007. Handbook of European freshwater fishes. Publications Kottelat, Cornol and Freyhof, Berlin. 646 pp.                                                                                                                                                                                                                                                                                                                                                                                                                                    | Very high |
| 12                                             | 3.04 | In the taxon's introduced range, are there known adverse impacts to ecosystem services?                                                                                 | No                                                  | Kottelat, M. and J. Freyhof, 2007. Handbook of European freshwater fishes. Publications Kottelat, Cornol and Freyhof, Berlin. 646 pp. Not evaluated elsewhere. But are there any consequences of stocking in 19th century? Diversity of Brown trout <i>Salmo cf. trutta</i> in the River Danube Basin of Western Balkans as Assessed from the Structure of Their Mitochondrial Control Region Haplotypes1 P. Simonovića, *, A. Tošića, D. Škraba Jurlinaa, V. Nikolića, M. Piriab, T. Tomljanovića. N. Špremb. D. Kottelat, M. and J. Freyhof, 2007. Handbook of European freshwater fishes. Publications Kottelat, Cornol and Freyhof,                                                    | High      |
| 13                                             | 3.05 | In the taxon's introduced range, are there known adverse socio-economic impacts?                                                                                        | No                                                  | Kottelat, M. and J. Freyhof, 2007. Handbook of European freshwater fishes. Publications Kottelat, Cornol and Freyhof,                                                                                                                                                                                                                                                                                                                                                                                                                                                                                                                                                                      | High      |
| B. Biology / Ecology                           |      |                                                                                                                                                                         |                                                     |                                                                                                                                                                                                                                                                                                                                                                                                                                                                                                                                                                                                                                                                                            |           |
| 4. Undesirable (or persistence) traits         |      |                                                                                                                                                                         |                                                     |                                                                                                                                                                                                                                                                                                                                                                                                                                                                                                                                                                                                                                                                                            |           |
| 14                                             | 4.01 | Is it likely that the taxon will be poisonous or pose other risks to human health?                                                                                      | No                                                  | Not toxic.                                                                                                                                                                                                                                                                                                                                                                                                                                                                                                                                                                                                                                                                                 | Very high |
| 15                                             | 4.02 | Is it likely that the taxon will smother one or more native taxa (that are not threatened or protected)?                                                                | Yes                                                 | Genetic variation among trout in the River Neretva basin, Bosnia and Herzegovina. 2006. A. RAZPET, S. SUS` NIK, T. JUG AND A. SNOJ*                                                                                                                                                                                                                                                                                                                                                                                                                                                                                                                                                        | Medium    |
| 16                                             | 4.03 | Are there any threatened or protected taxa that the non-native taxon would parasitise in the RA area?                                                                   | No                                                  | Not a parasite.                                                                                                                                                                                                                                                                                                                                                                                                                                                                                                                                                                                                                                                                            | Very high |
| 17                                             | 4.04 | Is the taxon adaptable in terms of climatic and other environmental conditions, thus enhancing its potential persistence if it has invaded or could invade the RA area? | No                                                  | Kottelat, M. and J. Freyhof, 2007. Handbook of European freshwater fishes. Publications Kottelat, Cornol and Freyhof, Berlin. 646 p                                                                                                                                                                                                                                                                                                                                                                                                                                                                                                                                                        | Very high |

|                                 |      |                                                                                                                                                                              |                |                                                                                                                                                                                                                                                           |           |
|---------------------------------|------|------------------------------------------------------------------------------------------------------------------------------------------------------------------------------|----------------|-----------------------------------------------------------------------------------------------------------------------------------------------------------------------------------------------------------------------------------------------------------|-----------|
| 18                              | 4.05 | Is the taxon likely to disrupt food-web structure/function in aquatic ecosystems if it has invaded or is likely to invade the RA                                             | Yes            | Salmonids are top predators. <i>S. trutta</i> , its relative is one of 100 most invasive species                                                                                                                                                          | Medium    |
| 19                              | 4.06 | Is the taxon likely to exert adverse impacts on ecosystem services in the RA area?                                                                                           | No             | Mostly impacts other species and congeners. A Handbook of Global Freshwater Invasive Species. Francis. 2012                                                                                                                                               | High      |
| 20                              | 4.07 | Is it likely that the taxon will host, and/or act as a vector for, recognised pests and infectious agents that are endemic in the RA                                         | Yes            | Close relative to <i>S. trutta</i> and other salmonids so probably yes                                                                                                                                                                                    | High      |
| 21                              | 4.08 | Is it likely that the taxon will host, and/or act as a vector for, recognised pests and infectious agents that are absent from (novel to) the RA area?                       | No             | Basins are in close proximity so probably no.                                                                                                                                                                                                             | High      |
| 22                              | 4.09 | Is it likely that the taxon will achieve a body size that will make it more likely to be released from captivity?                                                            | Not applicable | Not in captivity.                                                                                                                                                                                                                                         | High      |
| 23                              | 4.10 | Is the taxon capable of sustaining itself in a range of water velocity conditions (e.g. versatile in habitat use)?                                                           | Yes            | <a href="https://dergipark.org.tr/en/download/article-file/141678">https://dergipark.org.tr/en/download/article-file/141678</a> TJFAS                                                                                                                     | Very high |
| 24                              | 4.11 | Is it likely that the taxon's mode of existence (e.g. excretion of by-products) or behaviours (e.g. feeding) will reduce habitat quality for native taxa?                    | No             | <i>Salmo trutta</i> changes productivity in introduced streams but DA is not that competitive?                                                                                                                                                            | High      |
| 25                              | 4.12 | Is the taxon likely to maintain a viable population even when present in low densities (or persisting in adverse conditions by way of a dormant form)?                       | Yes            | Tosic et al. 2016.                                                                                                                                                                                                                                        | Very high |
| <b>5. Resource exploitation</b> |      |                                                                                                                                                                              |                |                                                                                                                                                                                                                                                           |           |
| 26                              | 5.01 | Is the taxon likely to consume threatened or protected native taxa in the RA area?                                                                                           | Yes            | Feeds on invertebrates, fish and crustaceans: Kottelat, M. and J. Freyhof, 2007. Handbook of European freshwater fishes. Publications Kottelat, Cornol and Freyhof, Berlin. 646 p                                                                         | High      |
| 27                              | 5.02 | Is the taxon likely to sequester food resources (including nutrients) to the detriment of native taxa in the RA area?                                                        | Yes            | For <i>S. trutta</i> RIP is:                                                                                                                                                                                                                              | High      |
| <b>6. Reproduction</b>          |      |                                                                                                                                                                              |                |                                                                                                                                                                                                                                                           |           |
| 28                              | 6.01 | Is the taxon likely to exhibit parental care and/or to reduce age-at-maturity in response to environmental conditions?                                                       | Yes            | Characteristics of the Hatchery-Reared Black Sea Salmon <i>Salmo trutta labrax</i> . 2007. V. Ya. Nikandrov and N. I. Shindavina For <i>S. trutta</i> definitely                                                                                          | High      |
| 29                              | 6.02 | Is the taxon likely to produce viable gametes or propagules (in the RA area)?                                                                                                | Yes            | Genetic variation among trout in the River Neretva basin, Bosnia and Herzegovina A. RAZPET, S. SUSI NIK, T. JUG AND A. SNOJ*                                                                                                                              | High      |
| 30                              | 6.03 | Is the taxon likely to hybridise naturally with native taxa?                                                                                                                 | Yes            | Genetic variation among trout in the River Neretva basin, Bosnia and Herzegovina A. RAZPET, S. SUSI NIK, T. JUG AND A. SNOJ*                                                                                                                              | Very high |
| 31                              | 6.04 | Is the taxon likely to be hermaphroditic or to display asexual reproduction?                                                                                                 | No             | Characteristics of the Hatchery-Reared Black Sea Salmon <i>Salmo trutta labrax</i> . 2007 V. Ya. Nikandrov and N. I. Shindavina                                                                                                                           | Very high |
| 32                              | 6.05 | Is the taxon dependent on the presence of another taxon (or specific habitat features) to complete its life cycle?                                                           | No             | No specialist incubators.                                                                                                                                                                                                                                 | Very high |
| 33                              | 6.06 | Is the taxon known (or likely) to produce a large number of propagules or offspring within a short time span (e.g. < 1 year)?                                                | Yes            | Fecundity and egg size of three salmonid species ( <i>Oncorhynchus mykiss</i> , <i>Salmo labrax</i> , <i>Salvelinus fontinalis</i> ) cultured at the same farm condition in north-eastern, Turkey. Author(s) : Serezli, R. ; Guzel, S. ; Kocabas, M. 2010 | High      |
| 34                              | 6.07 | How many time units (days, months, years) does the taxon require to reach the age-at-first-reproduction?                                                                     | 2              | Characteristics of the Hatchery-Reared Black Sea Salmon <i>Salmo trutta labrax</i> . 2007. V. Ya. Nikandrov and N. I. Shindavina                                                                                                                          | Very high |
| <b>7. Dispersal mechanisms</b>  |      |                                                                                                                                                                              |                |                                                                                                                                                                                                                                                           |           |
| 35                              | 7.01 | How many potential internal vectors/pathways could the taxon use to disperse within the RA area (with suitable)                                                              | One            | Unprofessional stocking                                                                                                                                                                                                                                   | High      |
| 36                              | 7.02 | Will any of these vectors/pathways bring the taxon in close proximity to one or more protected areas (e.g. MCZ, MPA, SSSI)?                                                  | Yes            | Genetic variation among trout in the River Neretva basin, Bosnia and Herzegovina. 2007 A. RAZPET, S. SUSI NIK, T. JUG AND A. SNOJ*                                                                                                                        | Very high |
| 37                              | 7.03 | Does the taxon have a means of actively attaching itself to hard substrata (e.g. ship hulls, pilings, buoys) such that it enhances the likelihood of dispersal?              | No             | No such adaptation.                                                                                                                                                                                                                                       | Very high |
| 38                              | 7.04 | Is natural dispersal of the taxon likely to occur as eggs (for animals) or as propagules (for plants: seeds, spores) in the RA area?                                         | No             | Kottelat, M. and J. Freyhof, 2007. Handbook of European freshwater fishes. Publications Kottelat, Cornol and Freyhof, Berlin. 646 pp.                                                                                                                     | Very high |
| 39                              | 7.05 | Is natural dispersal of the taxon likely to occur as larvae/juveniles (for animals) or as fragments/seedlings (for plants) in the RA area?                                   | Yes            | Kottelat, M. and J. Freyhof, 2007. Handbook of European freshwater fishes. Publications Kottelat, Cornol and Freyhof, Berlin. 646 pp.                                                                                                                     | High      |
| 40                              | 7.06 | Are older life stages of the taxon likely to migrate in the RA area for reproduction?                                                                                        | Yes            | Kottelat, M. and J. Freyhof, 2007. Handbook of European freshwater fishes. Publications Kottelat, Cornol and Freyhof,                                                                                                                                     | Very high |
| 41                              | 7.07 | Are propagules or eggs of the taxon likely to be dispersed in the RA area by other animals?                                                                                  | No             | Eggs don't have attaching adaptation.                                                                                                                                                                                                                     | Very high |
| 42                              | 7.08 | Is dispersal of the taxon along any of the vectors/pathways mentioned in the previous seven questions (35–41; i.e. both unintentional or intentional) likely to be           | Yes            | If intention it can be very rapid.                                                                                                                                                                                                                        | High      |
| 43                              | 7.09 | Is dispersal of the taxon density dependent?                                                                                                                                 | Yes            | Partial migratority is                                                                                                                                                                                                                                    | High      |
| <b>8. Tolerance attributes</b>  |      |                                                                                                                                                                              |                |                                                                                                                                                                                                                                                           |           |
| 44                              | 8.01 | Is the taxon able to withstand being out of water for extended periods (e.g. minimum of one or more hours) at some stage of its life cycle?                                  | No             | Salmonids are very sensitive to reduced oxygen levels                                                                                                                                                                                                     | Very high |
| 45                              | 8.02 | Is the taxon tolerant of a wide range of water quality conditions relevant to that taxon? [In the Justification field, indicate the relevant water quality variable(s) being | No             | Kottelat, M. and J. Freyhof, 2007. Handbook of European freshwater fishes. Publications Kottelat, Cornol and Freyhof, Berlin. 646 pp.                                                                                                                     | High      |

|                          |      |                                                                                                                                                              |           |                                                                                                                                       |           |
|--------------------------|------|--------------------------------------------------------------------------------------------------------------------------------------------------------------|-----------|---------------------------------------------------------------------------------------------------------------------------------------|-----------|
| 46                       | 8.03 | Can the taxon be controlled or eradicated in the wild with chemical, biological, or other agents/means?                                                      | No        | No efficant pesticides for eradication.                                                                                               | High      |
| 47                       | 8.04 | Is the taxon likely to tolerate or benefit from environmental/human disturbance?                                                                             | No        | Maybe floods?                                                                                                                         | High      |
| 48                       | 8.05 | Is the taxon able to tolerate salinity levels that are higher or lower than those found in its usual environment?                                            | Yes       | Kottelat, M. and J. Freyhof, 2007. Handbook of European freshwater fishes. Publications Kottelat, Cornol and Freyhof, Berlin. 646 pp. | High      |
| 49                       | 8.06 | Are there effective natural enemies (predators) of the taxon present in the RA                                                                               | Yes       | Same as for S.trutta. S. obtusirostis...                                                                                              | Very high |
| <b>C. Climate change</b> |      |                                                                                                                                                              |           |                                                                                                                                       |           |
| <b>9. Climate change</b> |      |                                                                                                                                                              |           |                                                                                                                                       |           |
| 50                       | 9.01 | Under the predicted future climatic conditions, are the risks of entry into the RA area posed by the taxon likely to increase, decrease or not change?       | No change | Same latitude for both basins. Professional judgement.                                                                                | Very high |
| 51                       | 9.02 | Under the predicted future climatic conditions, are the risks of establishment posed by the taxon likely to increase, decrease or not change?                | No change | Professional judgement.                                                                                                               | Very high |
| 52                       | 9.03 | Under the predicted future climatic conditions, are the risks of dispersal within the RA area posed by the taxon likely to increase, decrease or not change? | No change | Professional judgement.                                                                                                               | Very high |
| 53                       | 9.04 | Under the predicted future climatic conditions, what is the likely magnitude of future potential impacts on biodiversity and/or ecological integrity/status? | No change | Professional judgement.                                                                                                               | Very high |
| 54                       | 9.05 | Under the predicted future climatic conditions, what is the likely magnitude of future potential impacts on ecosystem structure and/or function?             | No change | Professional judgement.                                                                                                               | Very high |
| 55                       | 9.06 | Under the predicted future climatic conditions, what is the likely magnitude of future potential impacts on ecosystem services/socio-economic factors?       | No change | Professional judgement.                                                                                                               | Very high |

| Statistics                                     |             |
|------------------------------------------------|-------------|
| Scores                                         |             |
| <b>BRA</b>                                     | <b>23.0</b> |
| <b>BRA Outcome</b>                             | <b>-</b>    |
| <b>BRA+CCA</b>                                 | <b>23.0</b> |
| <b>BRA+CCA Outcome</b>                         | <b>-</b>    |
| Score partition                                |             |
| <b>A. Biogeography/Historical</b>              | <b>7.0</b>  |
| 1. Domestication/Cultivation                   | 4.0         |
| 2. Climate, distribution and introduction risk | 1.0         |
| 3. Invasive elsewhere                          | 2.0         |
| <b>B. Biology/Ecology</b>                      | <b>16.0</b> |
| 4. Undesirable (or persistence) traits         | 4.0         |
| 5. Resource exploitation                       | 7.0         |
| 6. Reproduction                                | 4.0         |
| 7. Dispersal mechanisms                        | 2.0         |
| 8. Tolerance attributes                        | -1.0        |
| <b>C. Climate change</b>                       | <b>0.0</b>  |
| 9. Climate change                              | 0.0         |
| Answered Questions                             |             |
| <b>Total</b>                                   | <b>55</b>   |
| <b>A. Biogeography/Historical</b>              | <b>13</b>   |
| 1. Domestication/Cultivation                   | 3           |
| 2. Climate, distribution and introduction risk | 5           |
| 3. Invasive elsewhere                          | 5           |
| <b>B. Biology/Ecology</b>                      | <b>36</b>   |
| 4. Undesirable (or persistence) traits         | 12          |
| 5. Resource exploitation                       | 2           |
| 6. Reproduction                                | 7           |
| 7. Dispersal mechanisms                        | 9           |
| 8. Tolerance attributes                        | 6           |
| <b>C. Climate change</b>                       | <b>6</b>    |
| 9. Climate change                              | 6           |
| Sectors affected                               |             |
| <b>Commercial</b>                              | <b>5</b>    |
| <b>Environmental</b>                           | <b>7</b>    |
| <b>Species or population nuisance traits</b>   | <b>14</b>   |

| Thresholds     |             |
|----------------|-------------|
| <b>BRA</b>     | <b>-</b>    |
| <b>BRA+CCA</b> | <b>-</b>    |
| Confidence     |             |
| <b>BRA+CCA</b> | <b>0.86</b> |
| <b>BRA</b>     | <b>0.84</b> |
| <b>CCA</b>     | <b>1.00</b> |

| Date and Time       |  |
|---------------------|--|
| 12/05/2021 20:02:04 |  |

## AS-ISK v2

| Taxon and Assessor details         |                                         |
|------------------------------------|-----------------------------------------|
| Category                           | Fishes and Lampreys (freshwater)        |
| Taxon name                         | <i>Salmo labrax</i>                     |
| Common name                        | Black Sea salmon                        |
| Assessor                           | Ivan Špelić                             |
| Risk screening context             |                                         |
| Reason and socio-economic benefits |                                         |
| Risk assessment area               | Danube & Adriatic basins BA, HR, ME, RS |
| Taxonomy                           |                                         |
| Native range                       |                                         |
| Introduced range                   |                                         |
| URL                                |                                         |

|                                                |      | Response                                                                                                                                                         | Justification (references and/or other information) | Confidence                                                                                                                                                                                                                                                                                                                                                                                                                                                                                                                                                                                       |           |
|------------------------------------------------|------|------------------------------------------------------------------------------------------------------------------------------------------------------------------|-----------------------------------------------------|--------------------------------------------------------------------------------------------------------------------------------------------------------------------------------------------------------------------------------------------------------------------------------------------------------------------------------------------------------------------------------------------------------------------------------------------------------------------------------------------------------------------------------------------------------------------------------------------------|-----------|
| A. Biogeography/ Historical                    |      |                                                                                                                                                                  |                                                     |                                                                                                                                                                                                                                                                                                                                                                                                                                                                                                                                                                                                  |           |
| 1. Domestication/Cultivation                   |      |                                                                                                                                                                  |                                                     |                                                                                                                                                                                                                                                                                                                                                                                                                                                                                                                                                                                                  |           |
| 1                                              | 1.01 | Has the taxon been the subject of domestication (or cultivation) for at least 20 generations?                                                                    | Yes                                                 | Reared in hatcheries (Nikandrov, V.Y., Shindavina, N.I., 2007. Characteristics of the hatchery-reared Black Sea salmon <i>Salmo trutta labrax</i> . Journal of Ichthyology 47, 184–193.. doi:10.1134/s0032945207020063; Ramazan Serezli, Senol Guzel and Mehmet Kocabas, 2010. Fecundity and Egg Size of Three Salmonid Species ( <i>Oncorhynchus mykiss</i> , <i>Salmo labrax</i> , <i>Salvelinus fontinalis</i> ) Cultured at the Same Farm Condition in North-Eastern Turkey. Journal of Animal and Veterinary                                                                                | Very high |
| 2                                              | 1.02 | Is the taxon harvested in the wild and likely to be sold or used in its live form?                                                                               | Yes                                                 | Nikandrov, V.Y., Shindavina, N.I., 2007. Characteristics of the hatchery-reared Black Sea salmon <i>Salmo trutta labrax</i> . Journal of Ichthyology 47, 184–193.. doi:10.1134/s0032945207020063                                                                                                                                                                                                                                                                                                                                                                                                 | Very high |
| 3                                              | 1.03 | Does the taxon have invasive races, varieties, sub-taxa or congeners?                                                                                            | Yes                                                 | <i>Salmo trutta</i> complex in general (CABI).                                                                                                                                                                                                                                                                                                                                                                                                                                                                                                                                                   | Very high |
| 2. Climate, distribution and introduction risk |      |                                                                                                                                                                  |                                                     |                                                                                                                                                                                                                                                                                                                                                                                                                                                                                                                                                                                                  |           |
| 4                                              | 2.01 | How similar are the climatic conditions of the Risk Assessment (RA) area and the taxon's native range?                                                           | Low                                                 | Estimated using Climatch, low number of points in the target area, only 6.                                                                                                                                                                                                                                                                                                                                                                                                                                                                                                                       | Low       |
| 5                                              | 2.02 | What is the quality of the climate matching data?                                                                                                                | Low                                                 | Estimated using Climatch, low number of points in the target area, only 6.                                                                                                                                                                                                                                                                                                                                                                                                                                                                                                                       | Very high |
| 6                                              | 2.03 | Is the taxon already present outside of captivity in the RA area?                                                                                                | Yes                                                 | Gacka river in Croatia (debatable if introduced or native as a consequence of historical hydrologic changes) (Jadan, M., Čož-Rakovac, R., Topić Popović, N., & Strunjak-Perović, I. (2007). Presence of unexpected phylogenetic lineages of brown trout <i>Salmo trutta</i> L. in Gacka River, Croatia. Aquaculture Research, 38(15), 1682–1685. doi:10.1111/j.1365-2109.2007.01832.x ).                                                                                                                                                                                                         | Very high |
| 7                                              | 2.04 | How many potential vectors could the taxon use to enter in the RA area?                                                                                          | Not applicable                                      | Already present (Jadan, M., Čož-Rakovac, R., Topić Popović, N., & Strunjak-Perović, I. (2007). Presence of unexpected phylogenetic lineages of brown trout <i>Salmo trutta</i> L. in Gacka River, Croatia. Aquaculture Research, 38(15), 1682–1685. doi:10.1111/j.1365-2109.2007.01832.x ).                                                                                                                                                                                                                                                                                                      | Very high |
| 8                                              | 2.05 | Is the taxon currently found in close proximity to, and likely to enter into, the RA area in the near future (e.g. unintentional and intentional introductions)? | Not applicable                                      | Already present (Jadan, M., Čož-Rakovac, R., Topić Popović, N., & Strunjak-Perović, I. (2007). Presence of unexpected phylogenetic lineages of brown trout <i>Salmo trutta</i> L. in Gacka River, Croatia. Aquaculture Research, 38(15), 1682–1685. doi:10.1111/j.1365-2109.2007.01832.x ).                                                                                                                                                                                                                                                                                                      | Very high |
| 3. Invasive elsewhere                          |      |                                                                                                                                                                  |                                                     |                                                                                                                                                                                                                                                                                                                                                                                                                                                                                                                                                                                                  |           |
| 9                                              | 3.01 | Has the taxon become naturalised (established viable populations) outside its native range?                                                                      | Yes                                                 | Gacka river (debatable) (Jadan, M., Čož-Rakovac, R., Topić Popović, N., & Strunjak-Perović, I. (2007). Presence of unexpected phylogenetic lineages of brown trout <i>Salmo trutta</i> L. in Gacka River, Croatia. Aquaculture Research, 38(15), 1682–1685. doi:10.1111/j.1365-2109.2007.01832.x ).                                                                                                                                                                                                                                                                                              | Medium    |
| 10                                             | 3.02 | In the taxon's introduced range, are there known adverse impacts to wild stocks or commercial taxa?                                                              | No                                                  | Not documented.                                                                                                                                                                                                                                                                                                                                                                                                                                                                                                                                                                                  | High      |
| 11                                             | 3.03 | In the taxon's introduced range, are there known adverse impacts to aquaculture?                                                                                 | No                                                  | Not documented                                                                                                                                                                                                                                                                                                                                                                                                                                                                                                                                                                                   | High      |
| 12                                             | 3.04 | In the taxon's introduced range, are there known adverse impacts to ecosystem                                                                                    | No                                                  | Not documented.                                                                                                                                                                                                                                                                                                                                                                                                                                                                                                                                                                                  | High      |
| 13                                             | 3.05 | In the taxon's introduced range, are there known adverse socio-economic impacts?                                                                                 | No                                                  | Not documented.                                                                                                                                                                                                                                                                                                                                                                                                                                                                                                                                                                                  | High      |
| B. Biology / Ecology                           |      |                                                                                                                                                                  |                                                     |                                                                                                                                                                                                                                                                                                                                                                                                                                                                                                                                                                                                  |           |
| 4. Undesirable (or persistence) traits         |      |                                                                                                                                                                  |                                                     |                                                                                                                                                                                                                                                                                                                                                                                                                                                                                                                                                                                                  |           |
| 14                                             | 4.01 | Is it likely that the taxon will be poisonous or pose other risks to human health?                                                                               | No                                                  | Harmless (Sa-a, Pascualita in Froese, R. and D. Pauly. Editors. 2021.FishBase. World Wide Web electronic publication. www.fishbase.org, ( 02/2021 )).                                                                                                                                                                                                                                                                                                                                                                                                                                            | Very high |
| 15                                             | 4.02 | Is it likely that the taxon will smother one or more native taxa (that are not threatened or protected)?                                                         | Yes                                                 | If biology and ecology are presumably similar to other invasive <i>Salmo trutta</i> lineages (belonging to the same brown trout complex). <i>Salmo trutta</i> has been implicated in reducing native fish populations (especially other salmonids) through predation, displacement, and food competition; <i>S. trutta</i> introductions may have eliminated or reduced several Plecoptera and Trichoptera species in streams in Victoria, Australia (CABI, 2021. <i>Salmo trutta</i> [original text by Sunil Siriwardena]. In: Invasive Species Compendium. Wallingford, UK: CAB International. | Medium    |
| 16                                             | 4.03 | Are there any threatened or protected taxa that the non-native taxon would parasitise in the RA area?                                                            | No                                                  | No parasitic behaviour (Kotellat & Freyhof 2008).                                                                                                                                                                                                                                                                                                                                                                                                                                                                                                                                                | Very high |



|                                 |      |                                                                                                                                                                         |                |                                                                                                                                                                                                                                                                                                                                                                                                                                                                                                                                                                                                                                                                                                                                                                                                                                                                                                                                                                   |           |
|---------------------------------|------|-------------------------------------------------------------------------------------------------------------------------------------------------------------------------|----------------|-------------------------------------------------------------------------------------------------------------------------------------------------------------------------------------------------------------------------------------------------------------------------------------------------------------------------------------------------------------------------------------------------------------------------------------------------------------------------------------------------------------------------------------------------------------------------------------------------------------------------------------------------------------------------------------------------------------------------------------------------------------------------------------------------------------------------------------------------------------------------------------------------------------------------------------------------------------------|-----------|
| 17                              | 4.04 | Is the taxon adaptable in terms of climatic and other environmental conditions, thus enhancing its potential persistence if it has invaded or could invade the RA area? | No             | For <i>Salmo trutta</i> : they prefer cold, well-oxygenated upland waters although their tolerance limits are lower than those of rainbow trout and favors large streams in the mountainous areas with adequate cover in the form of submerged rocks, undercut banks, and overhanging vegetation (Froese, R. and D. Pauly. Editors. 2019.FishBase. World Wide Web electronic publication. <a href="http://www.fishbase.org">www.fishbase.org</a> , ( 12/2019 ). <i>Salmo labrax</i> is distributed along the coasts of the Black and Azov Seas, and also in the rivers emptying into the seas (Lațiu, C., Cocan, D., Uiuu, P., Ihuț, A., Nicula, S.A., Constantinescu, R., Mireșan, V., 2020. The Black Sea Trout, <i>Salmo labrax</i> Pallas, 1814 (Pisces: Salmonidae) in Romanian Waters. Bulletin of University of Agricultural Sciences and Veterinary Medicine Cluj-Napoca. Animal Science and Biotechnologies 77, 9. doi:10.15835/buasvmcn-ash-2020-0017). | Medium    |
| 18                              | 4.05 | Is the taxon likely to disrupt food-web structure/function in aquatic ecosystems if it has invaded or is likely to invade the RA area?                                  | Yes            | Nystrom, P.; McIntosh, A. R. (2003): Are impacts of an exotic predator on a stream food web influenced by disturbance history? <i>Oecologia</i> (2003) 136:279–288. DOI 10.1007/s00442-003-1250-3 (for <i>Salmo trutta</i> ).                                                                                                                                                                                                                                                                                                                                                                                                                                                                                                                                                                                                                                                                                                                                     | Medium    |
| 19                              | 4.06 | Is the taxon likely to exert adverse impacts on ecosystem services in the RA area?                                                                                      | Yes            | For <i>Salmo trutta</i> : brown trout have been implicated in reducing native fish populations (especially other salmonids) through predation, displacement, food competition and hybridization (Global Invasive Species Database (2020) Species profile: <i>Salmo trutta</i> . Downloaded from <a href="http://www.iucnqisd.org/qisd/speciesname/Salmo+trutta">http://www.iucnqisd.org/qisd/speciesname/Salmo+trutta</a> on 25-                                                                                                                                                                                                                                                                                                                                                                                                                                                                                                                                  | Medium    |
| 20                              | 4.07 | Is it likely that the taxon will host, and/or act as a vector for, recognised pests and infectious agents that are endemic in the RA area?                              | Yes            | <i>Salmo trutta</i> is susceptible to pathogens and parasites (Cultured Aquatic Species Information Programme. <i>Salmo trutta</i> . Cultured Aquatic Species Information Programme. Text by Vandeputte, M. & Labbé, L. In: FAO Fisheries Division [online]. Rome. Updated . [Cited 24 May 2021].), so most likely <i>S. labrax</i> is also susceptible as a part of brown trout complex.                                                                                                                                                                                                                                                                                                                                                                                                                                                                                                                                                                         | Medium    |
| 21                              | 4.08 | Is it likely that the taxon will host, and/or act as a vector for, recognised pests and infectious agents that are absent from (novel to) the RA area?                  | Yes            | <i>Salmo trutta</i> is susceptible to pathogens and parasites (Cultured Aquatic Species Information Programme. <i>Salmo trutta</i> . Cultured Aquatic Species Information Programme. Text by Vandeputte, M. & Labbé, L. In: FAO Fisheries Division [online]. Rome. Updated . [Cited 24 May 2021].), so most likely <i>S. labrax</i> is also susceptible as a part of brown trout complex.                                                                                                                                                                                                                                                                                                                                                                                                                                                                                                                                                                         | Medium    |
| 22                              | 4.09 | Is it likely that the taxon will achieve a body size that will make it more likely to be released from captivity?                                                       | Yes            | 80 cm (Sa-a, Pascualita in Froese, R. and D. Pauly. Editors. 2021.FishBase. World Wide Web electronic publication. <a href="http://www.fishbase.org">www.fishbase.org</a> , ( 02/2021 )).                                                                                                                                                                                                                                                                                                                                                                                                                                                                                                                                                                                                                                                                                                                                                                         | Very high |
| 23                              | 4.10 | Is the taxon capable of sustaining itself in a range of water velocity conditions (e.g. versatile in habitat use)?                                                      | Yes            | There are anadromous, lacustrine and resident forms. At the sea, it occurs along coasts at depths of up to 50 m. Undertakes migration to hill streams. Resident part of populations live in streams and uppermost reaches with fast current, cold clear water and stone or gravel bottom (Sa-a, Pascualita in Froese, R. and D. Pauly. Editors. 2021.FishBase. World Wide Web electronic publication. <a href="http://www.fishbase.org">www.fishbase.org</a> , ( 02/2021 )).                                                                                                                                                                                                                                                                                                                                                                                                                                                                                      | Very high |
| 24                              | 4.11 | Is it likely that the taxon's mode of existence (e.g. excretion of by-products) or behaviours (e.g. feeding) will reduce habitat quality for native taxa?               | No             | Resident populations live in habitats with hard substrate, ecology does not imply such impacts (Sa-a, Pascualita in Froese, R. and D. Pauly. Editors. 2021.FishBase. World Wide Web electronic publication. <a href="http://www.fishbase.org">www.fishbase.org</a> , ( 02/2021 )) and it was never documented.                                                                                                                                                                                                                                                                                                                                                                                                                                                                                                                                                                                                                                                    | High      |
| 25                              | 4.12 | Is the taxon likely to maintain a viable population even when present in low densities (or persisting in adverse conditions by way of a dormant form)?                  | No             | No evidence, resilience very Low, minimum population doubling time more than 14 years (Sa-a, Pascualita in Froese, R. and D. Pauly. Editors. 2021.FishBase. World Wide Web electronic publication. <a href="http://www.fishbase.org">www.fishbase.org</a> , ( 02/2021 )).                                                                                                                                                                                                                                                                                                                                                                                                                                                                                                                                                                                                                                                                                         | Medium    |
| <b>5. Resource exploitation</b> |      |                                                                                                                                                                         |                |                                                                                                                                                                                                                                                                                                                                                                                                                                                                                                                                                                                                                                                                                                                                                                                                                                                                                                                                                                   |           |
| 26                              | 5.01 | Is the taxon likely to consume threatened or protected native taxa in the RA area?                                                                                      | Yes            | Small specimens feed on aquatic and terrestrial invertebrates, while adults feed on invertebrates and fish (Lațiu, C., Cocan, D., Uiuu, P., Ihuț, A., Nicula, S.A., Constantinescu, R., Mireșan, V., 2020. The Black Sea Trout, <i>Salmo labrax</i> Pallas, 1814 (Pisces: Salmonidae) in Romanian Waters. Bulletin of University of Agricultural Sciences and Veterinary Medicine Cluj-Napoca. Animal Science and Biotechnologies 77, 9.. doi:10.15835/buasvmcn-                                                                                                                                                                                                                                                                                                                                                                                                                                                                                                  | Medium    |
| 27                              | 5.02 | Is the taxon likely to sequester food resources (including nutrients) to the detriment of native taxa in the RA area?                                                   | Not applicable | No data for calculation.                                                                                                                                                                                                                                                                                                                                                                                                                                                                                                                                                                                                                                                                                                                                                                                                                                                                                                                                          | Very high |
| <b>6. Reproduction</b>          |      |                                                                                                                                                                         |                |                                                                                                                                                                                                                                                                                                                                                                                                                                                                                                                                                                                                                                                                                                                                                                                                                                                                                                                                                                   |           |
| 28                              | 6.01 | Is the taxon likely to exhibit parental care and/or to reduce age-at-maturity in response to environmental conditions?                                                  | No             | No evidence, not documented for brown trout complex.                                                                                                                                                                                                                                                                                                                                                                                                                                                                                                                                                                                                                                                                                                                                                                                                                                                                                                              | Medium    |
| 29                              | 6.02 | Is the taxon likely to produce viable gametes or propagules (in the RA area)?                                                                                           | Yes            | Established a self-sustainable population in the Gacka river in Croatia (debatable if introduced or native and consequence of historical hydrologic changes) (Jadan, M., Čož-Rakovac, R., Topić Popović, N., & Strunjak-Perović, I. (2007). Presence of unexpected phylogenetic lineages of brown trout <i>Salmo trutta</i> L. in Gacka River, Croatia. <i>Aquaculture Research</i> , 38(15), 1682–1685. doi:10.1111/i.1365-2109.2007.01832.x ).                                                                                                                                                                                                                                                                                                                                                                                                                                                                                                                  | Medium    |
| 30                              | 6.03 | Is the taxon likely to hybridise naturally with native taxa?                                                                                                            | Yes            | Buj I, Ivić L, Raguz L, Caleta M, Marčić Z, Duplić A, Zanella D, Tomašić A, Horvatić S, Karlović R and Mustafić P (2019). Trout in karstic watersheds – diversity, origin and perspective. <i>Front. Mar. Sci.</i> Conference Abstract: XVI European Congress of Ichthyology. doi: 10.3389/conf.fmars.2019.07.00114                                                                                                                                                                                                                                                                                                                                                                                                                                                                                                                                                                                                                                               | High      |
| 31                              | 6.04 | Is the taxon likely to be hermaphroditic or to display asexual reproduction?                                                                                            | No             | Not documented (Nikandrov, V.Y., Shindavina, N.I., 2007. Characteristics of the hatchery-reared Black Sea salmon <i>Salmo trutta labrax</i> . <i>Journal of Ichthyology</i> 47, 184–193.. doi:10.1134/s0032945207020063).                                                                                                                                                                                                                                                                                                                                                                                                                                                                                                                                                                                                                                                                                                                                         | Very high |
| 32                              | 6.05 | Is the taxon dependent on the presence of another taxon (or specific habitat features) to complete its life cycle?                                                      | Yes            | Spawns in upper reaches of streams with fast current (Sa-a, Pascualita in Froese, R. and D. Pauly. Editors. 2021.FishBase. World Wide Web electronic publication. <a href="http://www.fishbase.org">www.fishbase.org</a> , (                                                                                                                                                                                                                                                                                                                                                                                                                                                                                                                                                                                                                                                                                                                                      | High      |

|                                |      |                                                                                                                                                                              |                |                                                                                                                                                                                                                                                                                                                                                                                                                                                                                                                                                                                                 |           |
|--------------------------------|------|------------------------------------------------------------------------------------------------------------------------------------------------------------------------------|----------------|-------------------------------------------------------------------------------------------------------------------------------------------------------------------------------------------------------------------------------------------------------------------------------------------------------------------------------------------------------------------------------------------------------------------------------------------------------------------------------------------------------------------------------------------------------------------------------------------------|-----------|
| 33                             | 6.06 | Is the taxon known (or likely) to produce a large number of propagules or offspring within a short time span (e.g. < 1 year)?                                                | Yes            | 680-15014 eggs per female (Nikandrov, V.Y., Shindavina, N.I., 2007. Characteristics of the hatchery-reared Black Sea salmon <i>Salmo trutta labrax</i> . Journal of Ichthyology 47, 184-193.. doi:10.1134/s0032945207020063).                                                                                                                                                                                                                                                                                                                                                                   | Very high |
| 34                             | 6.07 | How many time units (days, months, years) does the taxon require to reach the age-at-first-reproduction?                                                                     | 2              | Females are mature at 2 years (Nikandrov, V.Y., Shindavina, N.I., 2007. Characteristics of the hatchery-reared Black Sea salmon <i>Salmo trutta labrax</i> . Journal of Ichthyology 47, 184-193.. doi:10.1134/s0032945207020063).                                                                                                                                                                                                                                                                                                                                                               | High      |
| <b>7. Dispersal mechanisms</b> |      |                                                                                                                                                                              |                |                                                                                                                                                                                                                                                                                                                                                                                                                                                                                                                                                                                                 |           |
| 35                             | 7.01 | How many potential internal vectors/pathways could the taxon use to disperse within the RA area (with suitable protected areas (e.g. MCZ, MPA, SSSI)?                        | One            | Uncontrolled introductions by anglers (personal opinion).                                                                                                                                                                                                                                                                                                                                                                                                                                                                                                                                       | Low       |
| 36                             | 7.02 | Will any of these vectors/pathways bring the taxon in close proximity to one or more protected areas (e.g. MCZ, MPA, SSSI)?                                                  | Yes            | If introduced to streams connected to water bodies within protected areas.                                                                                                                                                                                                                                                                                                                                                                                                                                                                                                                      | Low       |
| 37                             | 7.03 | Does the taxon have a means of actively attaching itself to hard substrata (e.g. ship hulls, pilings, buoys) such that it enhances the likelihood of dispersal?              | No             | No such adaptations.                                                                                                                                                                                                                                                                                                                                                                                                                                                                                                                                                                            | Very high |
| 38                             | 7.04 | Is natural dispersal of the taxon likely to occur as eggs (for animals) or as propagules (for plants: seeds, spores) in the RA area?                                         | No             | No data for spawning substrate for this species but other species from brown trout complex deposit eggs in redds between gravel (Luna, Susan M. in Froese, R. and D. Pauly. Editors. 2021.FishBase. World Wide Web electronic publication. www.fishbase.org, ( 02/2021 )).                                                                                                                                                                                                                                                                                                                      | Low       |
| 39                             | 7.05 | Is natural dispersal of the taxon likely to occur as larvae/juveniles (for animals) or as fragments/seedlings (for plants) in the RA area?                                   | No             | The fry stay near to the redd until they are 5-7 cm long (Aksungur, M., Zengin, M., Tabak, İ., Aksungur, N., & Alkan, A. (2011). Migration Characteristics of the Black Sea Trout ( <i>Salmo trutta labrax</i> , Pallas, 1814) in the Eastern Black Sea Coasts and Streams. Turkish Journal of Fisheries and Aquatic Sciences, 11, 623-630. http://doi.org/10.4194/1303-2712-v11_4_17).                                                                                                                                                                                                         | Medium    |
| 40                             | 7.06 | Are older life stages of the taxon likely to migrate in the RA area for reproduction?                                                                                        | Yes            | Undertakes migration to hill streams. Resident part of populations live in streams and uppermost reaches with fast current, cold clear water and stone or gravel bottom. Spawns in upper reaches with fast current (Luna, Susan M. in Froese, R. and D. Pauly. Editors. 2021.FishBase. World Wide Web electronic publication. www.fishbase.org, ( 02/2021 )).                                                                                                                                                                                                                                   | High      |
| 41                             | 7.07 | Are propagules or eggs of the taxon likely to be dispersed in the RA area by other animals?                                                                                  | No             | No data for spawning substrate for this species but other species from brown trout complex deposit eggs in redds between gravel (Luna, Susan M. in Froese, R. and D. Pauly. Editors. 2021.FishBase. World Wide Web electronic publication. www.fishbase.org, ( 02/2021 )).                                                                                                                                                                                                                                                                                                                      | Low       |
| 42                             | 7.08 | Is dispersal of the taxon along any of the vectors/pathways mentioned in the previous seven questions (35-41; i.e. both unintentional or intentional) likely to be           | Yes            | Uncontrolled introductions by anglers (personal opinion).                                                                                                                                                                                                                                                                                                                                                                                                                                                                                                                                       | Low       |
| 43                             | 7.09 | Is dispersal of the taxon density dependent?                                                                                                                                 | No             | Not documented.                                                                                                                                                                                                                                                                                                                                                                                                                                                                                                                                                                                 | Low       |
| <b>8. Tolerance attributes</b> |      |                                                                                                                                                                              |                |                                                                                                                                                                                                                                                                                                                                                                                                                                                                                                                                                                                                 |           |
| 44                             | 8.01 | Is the taxon able to withstand being out of water for extended periods (e.g. minimum of one or more hours) at some stage of its life cycle?                                  | No             | Personal observation.                                                                                                                                                                                                                                                                                                                                                                                                                                                                                                                                                                           | Very high |
| 45                             | 8.02 | Is the taxon tolerant of a wide range of water quality conditions relevant to that taxon? [In the Justification field, indicate the relevant water quality variable(s) being | No             | No specific info but closely related <i>Salmo trutta</i> requires cold, well oxygenated upland waters (Luna, Susan M. in Froese, R. and D. Pauly. Editors. 2021.FishBase. World Wide Web electronic publication. www.fishbase.org, ( 02/2021 )).                                                                                                                                                                                                                                                                                                                                                | Medium    |
| 46                             | 8.03 | Can the taxon be controlled or eradicated in the wild with chemical, biological, or other agents/means?                                                                      | No             | Not allowed in the RA area.                                                                                                                                                                                                                                                                                                                                                                                                                                                                                                                                                                     | Very high |
| 47                             | 8.04 | Is the taxon likely to tolerate or benefit from environmental/human disturbance?                                                                                             | No             | Damming hinders most returning adults to reach spawning sites (Luna, Susan M. in Froese, R. and D. Pauly. Editors. 2021.FishBase. World Wide Web electronic publication. www.fishbase.org, ( 02/2021 )).                                                                                                                                                                                                                                                                                                                                                                                        | High      |
| 48                             | 8.05 | Is the taxon able to tolerate salinity levels that are higher or lower than those found in its usual environment?                                                            | Yes            | Anadromous (Luna, Susan M. in Froese, R. and D. Pauly. Editors. 2021.FishBase. World Wide Web electronic publication. www.fishbase.org, ( 02/2021 )).                                                                                                                                                                                                                                                                                                                                                                                                                                           | Very high |
| 49                             | 8.06 | Are there effective natural enemies (predators) of the taxon present in the RA                                                                                               | Yes            | Piscivorous fish, birds and mammals (personal observation, personal communication).                                                                                                                                                                                                                                                                                                                                                                                                                                                                                                             | Very high |
| <b>C. Climate change</b>       |      |                                                                                                                                                                              |                |                                                                                                                                                                                                                                                                                                                                                                                                                                                                                                                                                                                                 |           |
| <b>9. Climate change</b>       |      |                                                                                                                                                                              |                |                                                                                                                                                                                                                                                                                                                                                                                                                                                                                                                                                                                                 |           |
| 50                             | 9.01 | Under the predicted future climatic conditions, are the risks of entry into the RA area posed by the taxon likely to increase, decrease or not change?                       | Not applicable | Already present.                                                                                                                                                                                                                                                                                                                                                                                                                                                                                                                                                                                | Very high |
| 51                             | 9.02 | Under the predicted future climatic conditions, are the risks of establishment posed by the taxon likely to increase, decrease or not change?                                | Decrease       | Trout (brown trout complex) are cold-water fish, they are particularly vulnerable to the effects of global warming, including increasing water temperatures and decreasing flow rates, future changes will reduce the number of potential habitats, especially in the Mediterranean, because of the future water scarcity conditions (Carosi, A., Ghetti, L., Padula, R., Lorenzoni, M., 2020. Population status and ecology of the <i>Salmo trutta</i> complex in an Italian river basin under multiple anthropogenic pressures. Ecology and Evolution 10. 7320-7333.. doi:10.1002/ece3.6457). | Medium    |
| 52                             | 9.03 | Under the predicted future climatic conditions, are the risks of dispersal within the RA area posed by the taxon likely to increase, decrease or not change?                 | Decrease       | Trout (brown trout complex) are cold-water fish, they are particularly vulnerable to the effects of global warming, including increasing water temperatures and decreasing flow rates, future changes will reduce the number of potential habitats, especially in the Mediterranean, because of the future water scarcity conditions (Carosi, A., Ghetti, L., Padula, R., Lorenzoni, M., 2020. Population status and ecology of the <i>Salmo trutta</i> complex in an Italian river basin under multiple anthropogenic pressures. Ecology and Evolution 10. 7320-7333.. doi:10.1002/ece3.6457). | Medium    |

|    |      |                                                                                                                                                              |           |                                                                                                                                                                                                                                                                                                                                                                                                                                                                                                                                                                                                                                                                                                                                                                                                                                                                                                                                                                                                                                                                                                                                                                                    |        |
|----|------|--------------------------------------------------------------------------------------------------------------------------------------------------------------|-----------|------------------------------------------------------------------------------------------------------------------------------------------------------------------------------------------------------------------------------------------------------------------------------------------------------------------------------------------------------------------------------------------------------------------------------------------------------------------------------------------------------------------------------------------------------------------------------------------------------------------------------------------------------------------------------------------------------------------------------------------------------------------------------------------------------------------------------------------------------------------------------------------------------------------------------------------------------------------------------------------------------------------------------------------------------------------------------------------------------------------------------------------------------------------------------------|--------|
| 53 | 9.04 | Under the predicted future climatic conditions, what is the likely magnitude of future potential impacts on biodiversity and/or ecological integrity/status? | Lower     | Trout (brown trout complex) are cold-water fish, they are particularly vulnerable to the effects of global warming, including increasing water temperatures and decreasing flow rates, future changes will impact the populations of trout, especially in the Mediterranean, because of the future water scarcity conditions (Carosi, A., Ghetti, L., Padula, R., Lorenzoni, M., 2020. Population status and ecology of the Salmo trutta complex in an Italian river basin under multiple anthropogenic pressures. Ecology and Evolution 10, 7320–7333.. doi:10.1002/ece3.6457). As waters warm, cold water species with lower “thermal niches” become competitively disadvantaged with respect to other species for which the warmer temperatures are optimal (Magnuson, J.J., L.B. Crowder, and P.A. Medvick. 1979. Temperature as an ecological                                                                                                                                                                                                                                                                                                                                 | Medium |
| 54 | 9.05 | Under the predicted future climatic conditions, what is the likely magnitude of future potential impacts on ecosystem structure and/or function?             | Lower     | Trout (brown trout complex) are cold-water fish, they are particularly vulnerable to the effects of global warming, including increasing water temperatures and decreasing flow rates, future changes will impact the populations of trout, especially in the Mediterranean, because of the future water scarcity conditions (Carosi, A., Ghetti, L., Padula, R., Lorenzoni, M., 2020. Population status and ecology of the Salmo trutta complex in an Italian river basin under multiple anthropogenic pressures. Ecology and Evolution 10, 7320–7333.. doi:10.1002/ece3.6457). As waters warm, cold water species with lower “thermal niches” become competitively disadvantaged with respect to other species for which the warmer temperatures are optimal (Magnuson, J.J., L.B. Crowder, and P.A. Medvick. 1979. Temperature as an ecological                                                                                                                                                                                                                                                                                                                                 | Medium |
| 55 | 9.06 | Under the predicted future climatic conditions, what is the likely magnitude of future potential impacts on ecosystem services/socio-economic factors?       | No change | Trout (brown trout complex) are cold-water fish, they are particularly vulnerable to the effects of global warming, including increasing water temperatures and decreasing flow rates, future changes will impact the populations of trout, especially in the Mediterranean, because of the future water scarcity conditions (Carosi, A., Ghetti, L., Padula, R., Lorenzoni, M., 2020. Population status and ecology of the Salmo trutta complex in an Italian river basin under multiple anthropogenic pressures. Ecology and Evolution 10, 7320–7333.. doi:10.1002/ece3.6457). As waters warm, cold water species with lower “thermal niches” become competitively disadvantaged with respect to other species for which the warmer temperatures are optimal (Magnuson, J.J., L.B. Crowder, and P.A. Medvick. 1979. Temperature as an ecological resource. Amer. Zool. 19:331-343.). In this case, adverse impact is recognized as reducing the number of native fish species, especially other Salmonids. With future conditions, both native and introduced Salmonids are predicted to experience reductions in suitable habitats so relative impact will not change (personal | Low    |

| Statistics                                     |      |
|------------------------------------------------|------|
| Scores                                         |      |
| BRA                                            | 17.0 |
| BRA Outcome                                    | -    |
| BRA+CCA                                        | 9.0  |
| BRA+CCA Outcome                                | -    |
| Score partition                                |      |
| A. Biogeography/Historical                     | 7.0  |
| 1. Domestication/Cultivation                   | 4.0  |
| 2. Climate, distribution and introduction risk | 1.0  |
| 3. Invasive elsewhere                          | 2.0  |
| B. Biology/Ecology                             | 10.0 |
| 4. Undesirable (or persistence) traits         | 6.0  |
| 5. Resource exploitation                       | 5.0  |
| 6. Reproduction                                | 1.0  |
| 7. Dispersal mechanisms                        | -1.0 |
| 8. Tolerance attributes                        | -1.0 |
| C. Climate change                              | -8.0 |
| 9. Climate change                              | -8.0 |
| Answered Questions                             |      |
| Total                                          | 55   |
| A. Biogeography/Historical                     | 13   |
| 1. Domestication/Cultivation                   | 3    |
| 2. Climate, distribution and introduction risk | 5    |
| 3. Invasive elsewhere                          | 5    |
| B. Biology/Ecology                             | 36   |
| 4. Undesirable (or persistence) traits         | 12   |
| 5. Resource exploitation                       | 2    |
| 6. Reproduction                                | 7    |
| 7. Dispersal mechanisms                        | 9    |
| 8. Tolerance attributes                        | 6    |
| C. Climate change                              | 6    |
| 9. Climate change                              | 6    |
| Sectors affected                               |      |
| Commercial                                     | 5    |
| Environmental                                  | 4    |
| Species or population nuisance traits          | 3    |

| Thresholds |      |
|------------|------|
| BRA        | -    |
| BRA+CCA    | -    |
| Confidence |      |
| BRA+CCA    | 0.69 |
| BRA        | 0.71 |
| CCA        | 0.54 |

| Date and Time       |
|---------------------|
| 27/05/2021 23:33:49 |

## AS-ISK v2

| Taxon and Assessor details         |                                         |
|------------------------------------|-----------------------------------------|
| Category                           | Fishes and Lampreys (freshwater)        |
| Taxon name                         | <i>Salmo labrax</i>                     |
| Common name                        | Black Sea salmon                        |
| Assessor                           | Tamara Kanjuh                           |
| Risk screening context             |                                         |
| Reason and socio-economic benefits |                                         |
| Risk assessment area               | Danube & Adriatic basins BA, HR, ME, RS |
| Taxonomy                           |                                         |
| Native range                       |                                         |
| Introduced range                   |                                         |
| URL                                |                                         |

|                                                |      | Response                                                                                                                                                                | Justification (references and/or other information) | Confidence                                                                                                                                                                                                                           |        |
|------------------------------------------------|------|-------------------------------------------------------------------------------------------------------------------------------------------------------------------------|-----------------------------------------------------|--------------------------------------------------------------------------------------------------------------------------------------------------------------------------------------------------------------------------------------|--------|
| A. Biogeography/Historical                     |      |                                                                                                                                                                         |                                                     |                                                                                                                                                                                                                                      |        |
| 1. Domestication/Cultivation                   |      |                                                                                                                                                                         |                                                     |                                                                                                                                                                                                                                      |        |
| 1                                              | 1.01 | Has the taxon been the subject of domestication (or cultivation) for at least 20 generations?                                                                           | Yes                                                 | For conserving the unique representative of salmonids—the Black Sea salmon <i>Salmo trutta labrax</i> —its hatchery rearing was initiated in 1998 at the Adler trout hatchery farm (Northern Caucasia) (Nikandrov&Shindavina, 2007). | High   |
| 2                                              | 1.02 | Is the taxon harvested in the wild and likely to be sold or used in its live form?                                                                                      | Yes                                                 | For conserving the unique representative of salmonids—the Black Sea salmon <i>Salmo trutta labrax</i> —its hatchery rearing was initiated in 1998 at the Adler trout hatchery farm (Northern Caucasia) (Nikandrov&Shindavina, 2007). | High   |
| 3                                              | 1.03 | Does the taxon have invasive races, varieties, sub-taxa or congeners?                                                                                                   | No                                                  | No information found.                                                                                                                                                                                                                | Medium |
| 2. Climate, distribution and introduction risk |      |                                                                                                                                                                         |                                                     |                                                                                                                                                                                                                                      |        |
| 4                                              | 2.01 | How similar are the climatic conditions of the Risk Assessment (RA) area and the taxon's native range?                                                                  | High                                                | Dfa, Dfb (Köppen–Geiger climate classification system)                                                                                                                                                                               | High   |
| 5                                              | 2.02 | What is the quality of the climate matching data?                                                                                                                       | High                                                | Köppen–Geiger climate classification system                                                                                                                                                                                          | High   |
| 6                                              | 2.03 | Is the taxon already present outside of captivity in the RA area?                                                                                                       | Yes                                                 | Translocated to the Adriatic basin.                                                                                                                                                                                                  | Medium |
| 7                                              | 2.04 | How many potential vectors could the taxon use to enter in the RA area?                                                                                                 | One                                                 | Intentional stocking.                                                                                                                                                                                                                | Medium |
| 8                                              | 2.05 | Is the taxon currently found in close proximity to, and likely to enter into, the RA area in the near future (e.g. unintentional and intentional introductions)?        | Yes                                                 | Translocated in Adriatic basin.                                                                                                                                                                                                      | High   |
| 3. Invasive elsewhere                          |      |                                                                                                                                                                         |                                                     |                                                                                                                                                                                                                                      |        |
| 9                                              | 3.01 | Has the taxon become naturalised (established viable populations) outside its introduced range?                                                                         | No                                                  | No information found.                                                                                                                                                                                                                | Low    |
| 10                                             | 3.02 | In the taxon's introduced range, are there known adverse impacts to wild stocks or commercial taxa?                                                                     | Yes                                                 | Food competition, hybridization                                                                                                                                                                                                      | Medium |
| 11                                             | 3.03 | In the taxon's introduced range, are there known adverse impacts to aquaculture?                                                                                        | No                                                  | No information found.                                                                                                                                                                                                                | Low    |
| 12                                             | 3.04 | In the taxon's introduced range, are there known adverse impacts to ecosystem                                                                                           | No                                                  | No informtion found.                                                                                                                                                                                                                 | Low    |
| 13                                             | 3.05 | In the taxon's introduced range, are there known adverse socio-economic impacts?                                                                                        | No                                                  | No information found.                                                                                                                                                                                                                | Low    |
| B. Biology/Ecology                             |      |                                                                                                                                                                         |                                                     |                                                                                                                                                                                                                                      |        |
| 4. Undesirable (or persistence) traits         |      |                                                                                                                                                                         |                                                     |                                                                                                                                                                                                                                      |        |
| 14                                             | 4.01 | Is it likely that the taxon will be poisonous or pose other risks to human health?                                                                                      | No                                                  | Harmless ( <a href="https://www.fishbase.de/summary/Salmo-labrax.html">https://www.fishbase.de/summary/Salmo-labrax.html</a> )                                                                                                       | High   |
| 15                                             | 4.02 | Is it likely that the taxon will smother one or more native taxa (that are not threatened or protected)?                                                                | No                                                  | No information found.                                                                                                                                                                                                                | Low    |
| 16                                             | 4.03 | Are there any threatened or protected taxa that the non-native taxon would parasitise in the RA area?                                                                   | No                                                  | The taxon is not a parasite.                                                                                                                                                                                                         | Medium |
| 17                                             | 4.04 | Is the taxon adaptable in terms of climatic and other environmental conditions, thus enhancing its potential persistence if it has invaded or could invade the RA area? | No                                                  | The taxon is sensitive to environmental conditions.                                                                                                                                                                                  | Medium |
| 18                                             | 4.05 | Is the taxon likely to disrupt food-web structure/function in aquatic ecosystems if it has invaded or is likely to invade the RA area?                                  | No                                                  | No information found.                                                                                                                                                                                                                | Low    |
| 19                                             | 4.06 | Is the taxon likely to exert adverse impacts on ecosystem services in the RA area?                                                                                      | No                                                  | No information found.                                                                                                                                                                                                                | Low    |
| 20                                             | 4.07 | Is it likely that the taxon will host, and/or act as a vector for, recognised pests and infectious agents that are endemic in the RA area?                              | No                                                  | No information found.                                                                                                                                                                                                                | Low    |
| 21                                             | 4.08 | Is it likely that the taxon will host, and/or act as a vector for, recognised pests and infectious agents that are absent from (novel to) the RA area?                  | No                                                  | No information found.                                                                                                                                                                                                                | Low    |
| 22                                             | 4.09 | Is it likely that the taxon will achieve a body size that will make it more likely to be released from captivity?                                                       | No                                                  | No information found.                                                                                                                                                                                                                | Low    |
| 23                                             | 4.10 | Is the taxon capable of sustaining itself in a range of water velocity conditions (e.g. versatile in habitat use)?                                                      | No                                                  | The taxon is sensitive to environmental conditions.                                                                                                                                                                                  | Medium |
| 24                                             | 4.11 | Is it likely that the taxon's mode of existence (e.g. excretion of by-products) or behaviours (e.g. feeding) will reduce habitat quality for native taxa?               | No                                                  | No information found.                                                                                                                                                                                                                | Low    |

|                                 |      |                                                                                                                                                                              |          |                                                                                                                                                                             |        |
|---------------------------------|------|------------------------------------------------------------------------------------------------------------------------------------------------------------------------------|----------|-----------------------------------------------------------------------------------------------------------------------------------------------------------------------------|--------|
| 25                              | 4.12 | Is the taxon likely to maintain a viable population even when present in low densities (or persisting in adverse conditions by way of a dormant form)?                       | Yes      | It has anadromous and potamodromous forms (Cărmășu, 1952; Svetovidov, 1984; Vasilieva, 2003; Kottelat&Freyhof, 2007).                                                       | Medium |
| <b>5. Resource exploitation</b> |      |                                                                                                                                                                              |          |                                                                                                                                                                             |        |
| 26                              | 5.01 | Is the taxon likely to consume threatened or protected native taxa in the RA area?                                                                                           | Yes      | Parrs and resident adults feed on aquatic and terrestrial invertebrates. Anadromous and large lacustrine individuals prey mostly on fish and large crustaceans (K&F, 2007). | Low    |
| 27                              | 5.02 | Is the taxon likely to sequester food resources (including nutrients) to the detriment of native taxa in the RA area?                                                        | No       | No information found.                                                                                                                                                       | Low    |
| <b>6. Reproduction</b>          |      |                                                                                                                                                                              |          |                                                                                                                                                                             |        |
| 28                              | 6.01 | Is the taxon likely to exhibit parental care and/or to reduce age-at-maturity in response to environmental conditions?                                                       | No       | No parental care.                                                                                                                                                           | High   |
| 29                              | 6.02 | Is the taxon likely to produce viable gametes or propagules (in the RA area)?                                                                                                | No       | No information found.                                                                                                                                                       | Medium |
| 30                              | 6.03 | Is the taxon likely to hybridise naturally with native taxa?                                                                                                                 | Yes      | Hybridization with <i>S. trutta</i> (Kottelat&Fryhof, 2007).                                                                                                                | Medium |
| 31                              | 6.04 | Is the taxon likely to be hermaphroditic or to display asexual reproduction?                                                                                                 | No       | No information found.                                                                                                                                                       | Medium |
| 32                              | 6.05 | Is the taxon dependent on the presence of another taxon (or specific habitat features) to complete its life cycle?                                                           | No       | No information found.                                                                                                                                                       | Medium |
| 33                              | 6.06 | Is the taxon known (or likely) to produce a large number of propagules or offspring within a short time span (e.g. < 1 year)?                                                | Yes      | Presumably like other salmonids.                                                                                                                                            | Medium |
| 34                              | 6.07 | How many time units (days, months, years) does the taxon require to reach the age-at-first-reproduction?                                                                     | 4        | Presumably like other salmonids.                                                                                                                                            | Medium |
| <b>7. Dispersal mechanisms</b>  |      |                                                                                                                                                                              |          |                                                                                                                                                                             |        |
| 35                              | 7.01 | How many potential internal vectors/pathways could the taxon use to disperse within the RA area (with suitable protected areas (e.g. MCZ, MPA, SSSI)?                        | One      | Intentional stocking.                                                                                                                                                       | Medium |
| 36                              | 7.02 | Will any of these vectors/pathways bring the taxon in close proximity to one or more protected areas (e.g. MCZ, MPA, SSSI)?                                                  | Yes      | Intentional stocking.                                                                                                                                                       | Medium |
| 37                              | 7.03 | Does the taxon have a means of actively attaching itself to hard substrata (e.g. ship hulls, pilings, buoys) such that it enhances the likelihood of dispersal?              | No       | Not known.                                                                                                                                                                  | Medium |
| 38                              | 7.04 | Is natural dispersal of the taxon likely to occur as eggs (for animals) or as propagules (for plants: seeds, spores) in the RA area?                                         | No       | Not as eggs, but could as juveniles.                                                                                                                                        | Medium |
| 39                              | 7.05 | Is natural dispersal of the taxon likely to occur as larvae/juveniles (for animals) or as fragments/seedlings (for plants) in the RA area?                                   | Yes      | Not as eggs, but could as juveniles.                                                                                                                                        | Medium |
| 40                              | 7.06 | Are older life stages of the taxon likely to migrate in the RA area for reproduction?                                                                                        | No       | No information found.                                                                                                                                                       | Low    |
| 41                              | 7.07 | Are propagules or eggs of the taxon likely to be dispersed in the RA area by other animals?                                                                                  | No       | No information found.                                                                                                                                                       | Medium |
| 42                              | 7.08 | Is dispersal of the taxon along any of the vectors/pathways mentioned in the previous seven questions (35–41; i.e. both unintentional or intentional) likely to be           | Yes      | Intentional translocations.                                                                                                                                                 | Medium |
| 43                              | 7.09 | Is dispersal of the taxon density dependent?                                                                                                                                 | No       | No information found.                                                                                                                                                       | Low    |
| <b>8. Tolerance attributes</b>  |      |                                                                                                                                                                              |          |                                                                                                                                                                             |        |
| 44                              | 8.01 | Is the taxon able to withstand being out of water for extended periods (e.g. minimum of one or more hours) at some stage of its life cycle?                                  | No       | The taxon does not survive out of water.                                                                                                                                    | High   |
| 45                              | 8.02 | Is the taxon tolerant of a wide range of water quality conditions relevant to that taxon? [In the Justification field, indicate the relevant water quality variable(s) being | No       | The taxon is sensitive to environmental changes.                                                                                                                            | Medium |
| 46                              | 8.03 | Can the taxon be controlled or eradicated in the wild with chemical, biological, or other agents/means?                                                                      | No       | No information found.                                                                                                                                                       | Medium |
| 47                              | 8.04 | Is the taxon likely to tolerate or benefit from environmental/human disturbance?                                                                                             | No       | The taxon is sensitive to environmental changes.                                                                                                                            | Medium |
| 48                              | 8.05 | Is the taxon able to tolerate salinity levels that are higher or lower than those found in its usual environment?                                                            | No       | The taxon is sensitive to environmental changes.                                                                                                                            | Medium |
| 49                              | 8.06 | Are there effective natural enemies (predators) of the taxon present in the RA                                                                                               | Yes      | As for other salmonids.                                                                                                                                                     | Medium |
| <b>C. Climate change</b>        |      |                                                                                                                                                                              |          |                                                                                                                                                                             |        |
| <b>9. Climate change</b>        |      |                                                                                                                                                                              |          |                                                                                                                                                                             |        |
| 50                              | 9.01 | Under the predicted future climatic conditions, are the risks of entry into the RA area posed by the taxon likely to increase, decrease or not change?                       | Decrease | The taxon is sensitive to environmental changes.                                                                                                                            | Medium |
| 51                              | 9.02 | Under the predicted future climatic conditions, are the risks of establishment posed by the taxon likely to increase, decrease or not change?                                | Decrease | The taxon is sensitive to environmental changes.                                                                                                                            | Medium |
| 52                              | 9.03 | Under the predicted future climatic conditions, are the risks of dispersal within the RA area posed by the taxon likely to increase, decrease or not change?                 | Decrease | The taxon is sensitive to environmental changes.                                                                                                                            | Medium |

|    |      |                                                                                                                                                              |       |                                                  |        |
|----|------|--------------------------------------------------------------------------------------------------------------------------------------------------------------|-------|--------------------------------------------------|--------|
| 53 | 9.04 | Under the predicted future climatic conditions, what is the likely magnitude of future potential impacts on biodiversity and/or ecological integrity/status? | Lower | The taxon is sensitive to environmental changes. | Medium |
| 54 | 9.05 | Under the predicted future climatic conditions, what is the likely magnitude of future potential impacts on ecosystem structure and/or function?             | Lower | The taxon is sensitive to environmental changes. | Medium |
| 55 | 9.06 | Under the predicted future climatic conditions, what is the likely magnitude of future potential impacts on ecosystem services/socio-economic factors?       | Lower | The taxon is sensitive to environmental changes. | Medium |

| Statistics                                     |              |
|------------------------------------------------|--------------|
| Scores                                         |              |
| <b>BRA</b>                                     | <b>6.0</b>   |
| <b>BRA Outcome</b>                             | <b>-</b>     |
| <b>BRA+CCA</b>                                 | <b>-6.0</b>  |
| <b>BRA+CCA Outcome</b>                         | <b>-</b>     |
| Score partition                                |              |
| <b>A. Biogeography/Historical</b>              | <b>5.0</b>   |
| 1. Domestication/Cultivation                   | 2.0          |
| 2. Climate, distribution and introduction risk | 1.0          |
| 3. Invasive elsewhere                          | 2.0          |
| <b>B. Biology/Ecology</b>                      | <b>1.0</b>   |
| 4. Undesirable (or persistence) traits         | 0.0          |
| 5. Resource exploitation                       | 5.0          |
| 6. Reproduction                                | 1.0          |
| 7. Dispersal mechanisms                        | -1.0         |
| 8. Tolerance attributes                        | -4.0         |
| <b>C. Climate change</b>                       | <b>-12.0</b> |
| 9. Climate change                              | -12.0        |
| Answered Questions                             |              |
| <b>Total</b>                                   | <b>55</b>    |
| <b>A. Biogeography/Historical</b>              | <b>13</b>    |
| 1. Domestication/Cultivation                   | 3            |
| 2. Climate, distribution and introduction risk | 5            |
| 3. Invasive elsewhere                          | 5            |
| <b>B. Biology/Ecology</b>                      | <b>36</b>    |
| 4. Undesirable (or persistence) traits         | 12           |
| 5. Resource exploitation                       | 2            |
| 6. Reproduction                                | 7            |
| 7. Dispersal mechanisms                        | 9            |
| 8. Tolerance attributes                        | 6            |
| <b>C. Climate change</b>                       | <b>6</b>     |
| 9. Climate change                              | 6            |
| Sectors affected                               |              |
| <b>Commercial</b>                              | <b>7</b>     |
| <b>Environmental</b>                           | <b>2</b>     |
| <b>Species or population nuisance traits</b>   | <b>-12</b>   |

| Thresholds     |             |
|----------------|-------------|
| <b>BRA</b>     | <b>-</b>    |
| <b>BRA+CCA</b> | <b>-</b>    |
| Confidence     |             |
| <b>BRA+CCA</b> | <b>0.47</b> |
| <b>BRA</b>     | <b>0.46</b> |
| <b>CCA</b>     | <b>0.50</b> |

| Date and Time       |  |
|---------------------|--|
| 02/06/2021 15:16:40 |  |

## AS-ISK v2

| Taxon and Assessor details         |                                         |
|------------------------------------|-----------------------------------------|
| Category                           | Fishes and Lampreys (freshwater)        |
| Taxon name                         | <i>Salmo labrax</i>                     |
| Common name                        | Black Sea salmon                        |
| Assessor                           | Tena Radocaj                            |
| Risk screening context             |                                         |
| Reason and socio-economic benefits |                                         |
| Risk assessment area               | Danube & Adriatic basins BA, HR, ME, RS |
| Taxonomy                           |                                         |
| Native range                       |                                         |
| Introduced range                   |                                         |
| URL                                |                                         |

|                                                |      | Response                                                                                                                                                                | Justification (references and/or other information) | Confidence                                                                                                                                                                                                                                                                                                                     |           |
|------------------------------------------------|------|-------------------------------------------------------------------------------------------------------------------------------------------------------------------------|-----------------------------------------------------|--------------------------------------------------------------------------------------------------------------------------------------------------------------------------------------------------------------------------------------------------------------------------------------------------------------------------------|-----------|
| A. Biogeography/Historical                     |      |                                                                                                                                                                         |                                                     |                                                                                                                                                                                                                                                                                                                                |           |
| 1. Domestication/Cultivation                   |      |                                                                                                                                                                         |                                                     |                                                                                                                                                                                                                                                                                                                                |           |
| 1                                              | 1.01 | Has the taxon been the subject of domestication (or cultivation) for at least 20 generations?                                                                           | Yes                                                 | Midilli, A., Kucuk, H., & Dincer, I. (2012). Environmental and sustainability aspects of a recirculating aquaculture system. <i>Environmental Progress &amp; Sustainable Energy</i> , 31(4), 604-611.                                                                                                                          | Very high |
| 2                                              | 1.02 | Is the taxon harvested in the wild and likely to be sold or used in its live form?                                                                                      | Yes                                                 | It is harvested for human consumption, and for sport fishing. ( Freyhof, J. 2013. <i>Salmo labrax</i> . The IUCN Red List of Threatened Species 2013)                                                                                                                                                                          | Very high |
| 3                                              | 1.03 | Does the taxon have invasive races, varieties, sub-taxa or congeners?                                                                                                   | Yes                                                 | <i>Salmo trutta</i> (Fishbase)                                                                                                                                                                                                                                                                                                 | High      |
| 2. Climate, distribution and introduction risk |      |                                                                                                                                                                         |                                                     |                                                                                                                                                                                                                                                                                                                                |           |
| 4                                              | 2.01 | How similar are the climatic conditions of the Risk Assessment (RA) area and the taxon's native range?                                                                  | Medium                                              | The similarity between climatic conditions RA area and native range is high. I use climatch.                                                                                                                                                                                                                                   | Medium    |
| 5                                              | 2.02 | What is the quality of the climate matching data?                                                                                                                       | Medium                                              | Distribution Map of IUCN and Climatch                                                                                                                                                                                                                                                                                          | Medium    |
| 6                                              | 2.03 | Is the taxon already present outside of captivity in the RA area?                                                                                                       | Yes                                                 | <i>S. labrax</i> is present outside of captivity in the RA area. (Buj, I., Raguž, L., Marčić, Z., Čaleta, M., Duplić, A., Zanella, D., ... & Karlović, R. (2021). Plitvice Lakes National park harbors ancient, yet endangered diversity of trout (genus <i>Salmo</i> ). <i>Journal of Applied Ichthyology</i> , 37(1), 20-37. | Medium    |
| 7                                              | 2.04 | How many potential vectors could the taxon use to enter in the RA area?                                                                                                 | Not applicable                                      | <i>S. labrax</i> is present in the RA area.                                                                                                                                                                                                                                                                                    | Very high |
| 8                                              | 2.05 | Is the taxon currently found in close proximity to, and likely to enter into, the RA area in the near future (e.g. unintentional and intentional introductions)?        | Not applicable                                      | <i>S. labrax</i> is present in the RA area.                                                                                                                                                                                                                                                                                    | Very high |
| 3. Invasive elsewhere                          |      |                                                                                                                                                                         |                                                     |                                                                                                                                                                                                                                                                                                                                |           |
| 9                                              | 3.01 | Has the taxon become naturalised (established viable populations) outside its native range?                                                                             | Yes                                                 | Buj, I., Raguž, L., Marčić, Z., Čaleta, M., Duplić, A., Zanella, D., ... & Karlović, R. (2021). Plitvice Lakes National park harbors ancient, yet endangered diversity of trout (genus <i>Salmo</i> ). <i>Journal of Applied Ichthyology</i> , 37(1), 20-37.                                                                   | Low       |
| 10                                             | 3.02 | In the taxon's introduced range, are there known adverse impacts to wild stocks or commercial taxa?                                                                     | No                                                  | No evidence, but probably they compete with native fish species.                                                                                                                                                                                                                                                               | Low       |
| 11                                             | 3.03 | In the taxon's introduced range, are there known adverse impacts to aquaculture?                                                                                        | No                                                  | No evidence                                                                                                                                                                                                                                                                                                                    | Low       |
| 12                                             | 3.04 | In the taxon's introduced range, are there known adverse impacts to ecosystem                                                                                           | No                                                  | Maybe can reducing native fish populations (especially other salmonids) through predation, displacement, and food competition                                                                                                                                                                                                  | Low       |
| 13                                             | 3.05 | In the taxon's introduced range, are there known adverse socio-economic impacts?                                                                                        | No                                                  | No evidence                                                                                                                                                                                                                                                                                                                    | Low       |
| B. Biology / Ecology                           |      |                                                                                                                                                                         |                                                     |                                                                                                                                                                                                                                                                                                                                |           |
| 4. Undesirable (or persistence) traits         |      |                                                                                                                                                                         |                                                     |                                                                                                                                                                                                                                                                                                                                |           |
| 14                                             | 4.01 | Is it likely that the taxon will be poisonous or pose other risks to human health?                                                                                      | No                                                  | <i>S. labrax</i> is harmless (Fishbase)                                                                                                                                                                                                                                                                                        | Very high |
| 15                                             | 4.02 | Is it likely that the taxon will smother one or more native taxa (that are not threatened or protected)?                                                                | No                                                  | No evidence                                                                                                                                                                                                                                                                                                                    | Low       |
| 16                                             | 4.03 | Are there any threatened or protected taxa that the non-native taxon would parasitise in the RA area?                                                                   | No                                                  | No                                                                                                                                                                                                                                                                                                                             | Medium    |
| 17                                             | 4.04 | Is the taxon adaptable in terms of climatic and other environmental conditions, thus enhancing its potential persistence if it has invaded or could invade the RA area? | Yes                                                 | Buj, I., Raguž, L., Marčić, Z., Čaleta, M., Duplić, A., Zanella, D., ... & Karlović, R. (2021). Plitvice Lakes National park harbors ancient, yet endangered diversity of trout (genus <i>Salmo</i> ). <i>Journal of Applied Ichthyology</i> , 37(1), 20-37.                                                                   | Medium    |
| 18                                             | 4.05 | Is the taxon likely to disrupt food-web structure/function in aquatic ecosystems if it has invaded or is likely to invade the RA area?                                  | No                                                  | No evidence (May in some places, trout populations have outgrown native fish populations so rapidly that native fish have been forced out).                                                                                                                                                                                    | Low       |
| 19                                             | 4.06 | Is the taxon likely to exert adverse impacts on ecosystem services in the RA area?                                                                                      | No                                                  | <i>S. labrax</i> no adverse impacts in the RA area.                                                                                                                                                                                                                                                                            | Medium    |
| 20                                             | 4.07 | Is it likely that the taxon will host, and/or act as a vector for, recognised pests and infectious agents that are endemic in the RA area?                              | Yes                                                 | Savas, H., Altinok, I., Cakmak, E., & Firidin, S. (2006). Isolation of <i>Renibacterium salmoninarum</i> from cultured Black Sea salmon ( <i>Salmo trutta labrax</i> ): first report in Turkey. <i>BULLETIN-EUROPEAN ASSOCIATION OF FISH PATHOLOGISTS</i> , 26(6), 238.                                                        | Medium    |
| 21                                             | 4.08 | Is it likely that the taxon will host, and/or act as a vector for, recognised pests and infectious agents that are absent from (novel to) the RA area?                  | Yes                                                 | Savas, H., Altinok, I., Cakmak, E., & Firidin, S. (2006). Isolation of <i>Renibacterium salmoninarum</i> from cultured Black Sea salmon ( <i>Salmo trutta labrax</i> ): first report in Turkey. <i>BULLETIN-EUROPEAN ASSOCIATION OF FISH PATHOLOGISTS</i> , 26(6), 238.                                                        | Medium    |
| 22                                             | 4.09 | Is it likely that the taxon will achieve a body size that will make it more likely to be released from captivity?                                                       | Yes                                                 | 80.0 cm SL (Fishbase)                                                                                                                                                                                                                                                                                                          | Very high |
| 23                                             | 4.10 | Is the taxon capable of sustaining itself in a range of water velocity conditions (e.g. versatile in habitat use)?                                                      | Yes                                                 | Resident part of populations in streams and uppermost reaches with fast current, cold clear water and stone or gravel bottom. ( Freyhof, J. 2013. <i>Salmo labrax</i> . The IUCN Red List of Threatened                                                                                                                        | High      |



|                                 |      |                                                                                                                                                                              |                |                                                                                                                                                                                                                                                                          |           |
|---------------------------------|------|------------------------------------------------------------------------------------------------------------------------------------------------------------------------------|----------------|--------------------------------------------------------------------------------------------------------------------------------------------------------------------------------------------------------------------------------------------------------------------------|-----------|
| 24                              | 4.11 | Is it likely that the taxon's mode of existence (e.g. excretion of by-products) or behaviours (e.g. feeding) will reduce habitat quality for native taxa?                    | No             | No evidence                                                                                                                                                                                                                                                              | Low       |
| 25                              | 4.12 | Is the taxon likely to maintain a viable population even when present in low densities (or persisting in adverse conditions by way of a dormant form)?                       | No             | Freyhof, J. 2013. <i>Salmo labrax</i> . The IUCN Red List of Threatened Species 2013                                                                                                                                                                                     | Medium    |
| <b>5. Resource exploitation</b> |      |                                                                                                                                                                              |                |                                                                                                                                                                                                                                                                          |           |
| 26                              | 5.01 | Is the taxon likely to consume threatened or protected native taxa in the RA area?                                                                                           | Yes            | Parrs and resident adults feed on aquatic and terrestrial invertebrates. Anadromous and large lacustrine individuals prey mostly on fish and large crustaceans. (Fishbase)                                                                                               | High      |
| 27                              | 5.02 | Is the taxon likely to sequester food resources (including nutrients) to the detriment of native taxa in the RA area?                                                        | Not applicable | Not applicable                                                                                                                                                                                                                                                           | Very high |
| <b>6. Reproduction</b>          |      |                                                                                                                                                                              |                |                                                                                                                                                                                                                                                                          |           |
| 28                              | 6.01 | Is the taxon likely to exhibit parental care and/or to reduce age-at-maturity in response to environmental conditions?                                                       | No             | Fishbase                                                                                                                                                                                                                                                                 | Medium    |
| 29                              | 6.02 | Is the taxon likely to produce viable gametes or propagules (in the RA area)?                                                                                                | Yes            | Buj, I., Raguž, L., Marčić, Z., Čaleta, M., Duplić, A., Zanella, D., ... & Karlović, R. (2021). Plitvice Lakes National park harbors ancient, yet endangered diversity of trout (genus <i>Salmo</i> ). <i>Journal of Applied Ichthyology</i> , 37(1), 20-37.             | Very high |
| 30                              | 6.03 | Is the taxon likely to hybridise naturally with native taxa?                                                                                                                 | Yes            | LAȚIU, C., COCAN, D., UIUIU, P., IHUȚ, A., NICULA, S. A., CONSTANTINESCU, R., & MIREȘAN, V. (2020). The Black Sea Trout, <i>Salmo labrax</i> Pallas, 1814 (Pisces: Salmonidae) in Romanian Waters. <i>Bulletin UASVM Animal Science and</i>                              | Low       |
| 31                              | 6.04 | Is the taxon likely to be hermaphroditic or to display asexual reproduction?                                                                                                 | No             | No evidence                                                                                                                                                                                                                                                              | Low       |
| 32                              | 6.05 | Is the taxon dependent on the presence of another taxon (or specific habitat features) to complete its life cycle?                                                           | Yes            | Resident part of populations in streams and uppermost reaches with fast current, cold clear water and stone or gravel bottom. Spawns in upper reaches with fast current (Freyhof, J. 2013. <i>Salmo labrax</i> . The IUCN Red List of Threatened Species 2013)           | Low       |
| 33                              | 6.06 | Is the taxon known (or likely) to produce a large number of propagules or offspring within a short time span (e.g. < 1 year)?                                                | No             | Fishbase                                                                                                                                                                                                                                                                 | Low       |
| 34                              | 6.07 | How many time units (days, months, years) does the taxon require to reach the age-at-first-reproduction?                                                                     | 2              | between 2 and 4 years old (Cakmak, E., Firidin, S., Duzgunes, Z. D., & Parlak, R. (2019). The age-dependent reproductive performance of 4th generation Black Sea Trout ( <i>Salmo labrax</i> Pallas, 1814) Females. <i>Turkish Journal of Fisheries and Aquatic</i>      | High      |
| <b>7. Dispersal mechanisms</b>  |      |                                                                                                                                                                              |                |                                                                                                                                                                                                                                                                          |           |
| 35                              | 7.01 | How many potential internal vectors/pathways could the taxon use to disperse within the RA area (with suitable                                                               | >1             | 1. human influence 2. natural spread via natural and manmade watercourses                                                                                                                                                                                                | Medium    |
| 36                              | 7.02 | Will any of these vectors/pathways bring the taxon in close proximity to one or more protected areas (e.g. MCZ, MPA, SSSI)?                                                  | Yes            | Buj, I., Raguž, L., Marčić, Z., Čaleta, M., Duplić, A., Zanella, D., ... & Karlović, R. (2021). Plitvice Lakes National park harbors ancient, yet endangered diversity of trout (genus <i>Salmo</i> ). <i>Journal of Applied Ichthyology</i> , 37(1), 20-37.             | High      |
| 37                              | 7.03 | Does the taxon have a means of actively attaching itself to hard substrata (e.g. ship hulls, pilings, buoys) such that it enhances the likelihood of dispersal?              | No             | Fishbase                                                                                                                                                                                                                                                                 | Very high |
| 38                              | 7.04 | Is natural dispersal of the taxon likely to occur as eggs (for animals) or as propagules (for plants: seeds, spores) in the RA area?                                         | No             | Freyhof, J. 2013. <i>Salmo labrax</i> . The IUCN Red List of Threatened Species 2013                                                                                                                                                                                     | Low       |
| 39                              | 7.05 | Is natural dispersal of the taxon likely to occur as larvae/juveniles (for animals) or as fragments/seedlings (for plants) in the RA area?                                   | Yes            | Freyhof, J. 2013. <i>Salmo labrax</i> . The IUCN Red List of Threatened Species 2013                                                                                                                                                                                     | Low       |
| 40                              | 7.06 | Are older life stages of the taxon likely to migrate in the RA area for reproduction?                                                                                        | Yes            | Fishbase                                                                                                                                                                                                                                                                 | High      |
| 41                              | 7.07 | Are propagules or eggs of the taxon likely to be dispersed in the RA area by other animals?                                                                                  | No             | Freyhof, J. 2013. <i>Salmo labrax</i> . The IUCN Red List of Threatened Species 2013                                                                                                                                                                                     | High      |
| 42                              | 7.08 | Is dispersal of the taxon along any of the vectors/pathways mentioned in the previous seven questions (35–41; i.e. both unintentional or intentional) likely to be           | Yes            | There is the possibility of a high rate of dispersal of taxa. E.g. when a fertilized individual enters a new area by some kind of dispersal.                                                                                                                             | Low       |
| 43                              | 7.09 | Is dispersal of the taxon density dependent?                                                                                                                                 | No             | No                                                                                                                                                                                                                                                                       | Medium    |
| <b>8. Tolerance attributes</b>  |      |                                                                                                                                                                              |                |                                                                                                                                                                                                                                                                          |           |
| 44                              | 8.01 | Is the taxon able to withstand being out of water for extended periods (e.g. minimum of one or more hours) at some stage of its life cycle?                                  | No             | Kottelat, M. and J. Freyhof, 2007. Handbook of European freshwater fishes. Publications Kottelat, Cornol and Freyhof, Berlin                                                                                                                                             | Medium    |
| 45                              | 8.02 | Is the taxon tolerant of a wide range of water quality conditions relevant to that taxon? [In the Justification field, indicate the relevant water quality variable(s) being | No             | Kottelat, M. and J. Freyhof, 2007. Handbook of European freshwater fishes. Publications Kottelat, Cornol and Freyhof, Berlin                                                                                                                                             | Medium    |
| 46                              | 8.03 | Can the taxon be controlled or eradicated in the wild with chemical, biological, or other agents/means?                                                                      | No             | Kottelat, M. and J. Freyhof, 2007. Handbook of European freshwater fishes. Publications Kottelat, Cornol and Freyhof, Berlin                                                                                                                                             | Very high |
| 47                              | 8.04 | Is the taxon likely to tolerate or benefit from environmental/human disturbance?                                                                                             | No             | damming, most returning adults are unable to reach spawning sites. The resident populations are less impacted by the dams (Freyhof, J. 2013. <i>Salmo labrax</i> . The IUCN Red List of Threatened                                                                       | Very high |
| 48                              | 8.05 | Is the taxon able to tolerate salinity levels that are higher or lower than those found in its usual environment?                                                            | Yes            | 17 (Cakmak, E., Firidin, S., Duzgunes, Z. D., & Parlak, R. (2019). The age-dependent reproductive performance of 4th generation Black Sea Trout ( <i>Salmo labrax</i> Pallas, 1814) Females. <i>Turkish Journal of Fisheries and Aquatic Sciences</i> , 19(6), 496-502). | Low       |
| 49                              | 8.06 | Are there effective natural enemies (predators) of the taxon present in the RA                                                                                               | Yes            | Catfish, Zander...                                                                                                                                                                                                                                                       | Medium    |
| <b>C. Climate change</b>        |      |                                                                                                                                                                              |                |                                                                                                                                                                                                                                                                          |           |
| <b>9. Climate change</b>        |      |                                                                                                                                                                              |                |                                                                                                                                                                                                                                                                          |           |

|    |      |                                                                                                                                                              |                |                                                                                                                                                                                                             |           |
|----|------|--------------------------------------------------------------------------------------------------------------------------------------------------------------|----------------|-------------------------------------------------------------------------------------------------------------------------------------------------------------------------------------------------------------|-----------|
| 50 | 9.01 | Under the predicted future climatic conditions, are the risks of entry into the RA area posed by the taxon likely to increase, decrease or not change?       | Not applicable | S. labrax is present in the RA area.                                                                                                                                                                        | Very high |
| 51 | 9.02 | Under the predicted future climatic conditions, are the risks of establishment posed by the taxon likely to increase, decrease or not change?                | Decrease       | Comte, L., Buisson, L., Daufresne, M., & Grenouillet, G. (2013). Climate-induced changes in the distribution of freshwater fish: observed and predicted trends. <i>Freshwater Biology</i> , 58(4), 625-639. | Low       |
| 52 | 9.03 | Under the predicted future climatic conditions, are the risks of dispersal within the RA area posed by the taxon likely to increase, decrease or not change? | Decrease       | Comte, L., Buisson, L., Daufresne, M., & Grenouillet, G. (2013). Climate-induced changes in the distribution of freshwater fish: observed and predicted trends. <i>Freshwater Biology</i> , 58(4), 625-639. | Low       |
| 53 | 9.04 | Under the predicted future climatic conditions, what is the likely magnitude of future potential impacts on biodiversity and/or ecological integrity/status? | No change      | Comte, L., Buisson, L., Daufresne, M., & Grenouillet, G. (2013). Climate-induced changes in the distribution of freshwater fish: observed and predicted trends. <i>Freshwater Biology</i> , 58(4), 625-639. | Low       |
| 54 | 9.05 | Under the predicted future climatic conditions, what is the likely magnitude of future potential impacts on ecosystem structure and/or function?             | No change      | Comte, L., Buisson, L., Daufresne, M., & Grenouillet, G. (2013). Climate-induced changes in the distribution of freshwater fish: observed and predicted trends. <i>Freshwater Biology</i> , 58(4), 625-639. | Low       |
| 55 | 9.06 | Under the predicted future climatic conditions, what is the likely magnitude of future potential impacts on ecosystem services/socio-economic factors?       | No change      | Comte, L., Buisson, L., Daufresne, M., & Grenouillet, G. (2013). Climate-induced changes in the distribution of freshwater fish: observed and predicted trends. <i>Freshwater Biology</i> , 58(4), 625-639. | Low       |

| Statistics                                     |             |
|------------------------------------------------|-------------|
| Scores                                         |             |
| <b>BRA</b>                                     | <b>17.5</b> |
| <b>BRA Outcome</b>                             | <b>-</b>    |
| <b>BRA+CCA</b>                                 | <b>13.5</b> |
| <b>BRA+CCA Outcome</b>                         | <b>-</b>    |
| Score partition                                |             |
| <b>A. Biogeography/Historical</b>              | <b>6.5</b>  |
| 1. Domestication/Cultivation                   | 4.0         |
| 2. Climate, distribution and introduction risk | 1.0         |
| 3. Invasive elsewhere                          | 1.5         |
| <b>B. Biology/Ecology</b>                      | <b>11.0</b> |
| 4. Undesirable (or persistence) traits         | 5.0         |
| 5. Resource exploitation                       | 5.0         |
| 6. Reproduction                                | 0.0         |
| 7. Dispersal mechanisms                        | 2.0         |
| 8. Tolerance attributes                        | -1.0        |
| <b>C. Climate change</b>                       | <b>-4.0</b> |
| 9. Climate change                              | -4.0        |
| Answered Questions                             |             |
| <b>Total</b>                                   | <b>55</b>   |
| <b>A. Biogeography/Historical</b>              | <b>13</b>   |
| 1. Domestication/Cultivation                   | 3           |
| 2. Climate, distribution and introduction risk | 5           |
| 3. Invasive elsewhere                          | 5           |
| <b>B. Biology/Ecology</b>                      | <b>36</b>   |
| 4. Undesirable (or persistence) traits         | 12          |
| 5. Resource exploitation                       | 2           |
| 6. Reproduction                                | 7           |
| 7. Dispersal mechanisms                        | 9           |
| 8. Tolerance attributes                        | 6           |
| <b>C. Climate change</b>                       | <b>6</b>    |
| 9. Climate change                              | 6           |
| Sectors affected                               |             |
| <b>Commercial</b>                              | <b>6</b>    |
| <b>Environmental</b>                           | <b>6</b>    |
| <b>Species or population nuisance traits</b>   | <b>6</b>    |

| Thresholds     |             |
|----------------|-------------|
| <b>BRA</b>     | <b>-</b>    |
| <b>BRA+CCA</b> | <b>-</b>    |
| Confidence     |             |
| <b>BRA+CCA</b> | <b>0.55</b> |
| <b>BRA</b>     | <b>0.57</b> |
| <b>CCA</b>     | <b>0.38</b> |

| Date and Time       |  |
|---------------------|--|
| 19/05/2021 12:31:27 |  |

## AS-ISK v2

| Taxon and Assessor details         |                                         |
|------------------------------------|-----------------------------------------|
| Category                           | Fishes and Lampreys (freshwater)        |
| Taxon name                         | <i>Salmo letnica</i>                    |
| Common name                        | Ohrid trout                             |
| Assessor                           | Ana Marić                               |
| Risk screening context             |                                         |
| Reason and socio-economic benefits |                                         |
| Risk assessment area               | Danube & Adriatic basins BA, HR, ME, RS |
| Taxonomy                           |                                         |
| Native range                       |                                         |
| Introduced range                   |                                         |
| URL                                |                                         |

|                                                |      | Response                                                                                                                                                                | Justification (references and/or other information) | Confidence                                                                                                                                                                                                                                   |           |
|------------------------------------------------|------|-------------------------------------------------------------------------------------------------------------------------------------------------------------------------|-----------------------------------------------------|----------------------------------------------------------------------------------------------------------------------------------------------------------------------------------------------------------------------------------------------|-----------|
| A. Biogeography/Historical                     |      |                                                                                                                                                                         |                                                     |                                                                                                                                                                                                                                              |           |
| 1. Domestication/Cultivation                   |      |                                                                                                                                                                         |                                                     |                                                                                                                                                                                                                                              |           |
| 1                                              | 1.01 | Has the taxon been the subject of domestication (or cultivation) for at least 20 generations?                                                                           | Yes                                                 | <a href="http://www.fao.org/fishery/countrysector/naso_macedonia/en">http://www.fao.org/fishery/countrysector/naso_macedonia/en</a>                                                                                                          | Very high |
| 2                                              | 1.02 | Is the taxon harvested in the wild and likely to be sold or used in its live form?                                                                                      | Yes                                                 | Historical demography of brown trout ( <i>Salmo trutta</i> ) in the Adriatic drainage including the putative <i>S. letnica</i> endemic to Lake Ohrid. Simona Susnik a,b, Ales` Snoj b, Iain F. Wilson c, Danilo Mrdak d, Steven Weiss. 2007. | Very high |
| 3                                              | 1.03 | Does the taxon have invasive races, varieties, sub-taxa or congeners?                                                                                                   | Yes                                                 | A handbook of aquatic freshwater species. Francis 2012.                                                                                                                                                                                      | Very high |
| 2. Climate, distribution and introduction risk |      |                                                                                                                                                                         |                                                     |                                                                                                                                                                                                                                              |           |
| 4                                              | 2.01 | How similar are the climatic conditions of the Risk Assessment (RA) area and the taxon's native range?                                                                  | High                                                | 19                                                                                                                                                                                                                                           | Very high |
| 5                                              | 2.02 | What is the quality of the climate matching data?                                                                                                                       | Medium                                              | Climach - no adequate points.                                                                                                                                                                                                                | High      |
| 6                                              | 2.03 | Is the taxon already present outside of captivity in the RA area?                                                                                                       | Yes                                                 | Deterioration of the fish-species assemblage due to the human impact and the pike introduction as a measure for restoration of the Vlasinsko Reservoir (Serbia, Yugoslavia). Simonovic. 2000.                                                | Very high |
| 7                                              | 2.04 | How many potential vectors could the taxon use to enter in the RA area?                                                                                                 | One                                                 | Stocking. Deterioration of the fish-species assemblage due to the human impact and the pike introduction as a measure for restoration of the Vlasinsko Reservoir (Serbia, Yugoslavia).                                                       | High      |
| 8                                              | 2.05 | Is the taxon currently found in close proximity to, and likely to enter into, the RA area in the near future (e.g. unintentional and intentional introductions)?        | Yes                                                 | Lake Ohrid is in close proximity. Kottelat, M. and J. Freyhof, 2007. Handbook of European freshwater fishes. Publications Kottelat, Cornol and Freyhof, Berlin. 646 pp.                                                                      | High      |
| 3. Invasive elsewhere                          |      |                                                                                                                                                                         |                                                     |                                                                                                                                                                                                                                              |           |
| 9                                              | 3.01 | Has the taxon become naturalised (established viable populations) outside its native range?                                                                             | Yes                                                 | Deterioration of the fish-species assemblage due to the human impact and the pike introduction as a measure for restoration of the Vlasinsko Reservoir (Serbia, Yugoslavia). Simonovic. 2000.                                                | Very high |
| 10                                             | 3.02 | In the taxon's introduced range, are there known adverse impacts to wild stocks or commercial taxa?                                                                     | No                                                  | Deterioration of the fish-species assemblage due to the human impact and the pike introduction as a measure for restoration of the Vlasinsko Reservoir (Serbia, Yugoslavia). Simonovic. 2000.                                                | Medium    |
| 11                                             | 3.03 | In the taxon's introduced range, are there known adverse impacts to aquaculture?                                                                                        | No                                                  | Deterioration of the fish-species assemblage due to the human impact and the pike introduction as a measure for restoration of the Vlasinsko Reservoir (Serbia, Yugoslavia). Simonovic. 2000.                                                | Very high |
| 12                                             | 3.04 | In the taxon's introduced range, are there known adverse impacts to ecosystem services?                                                                                 | No                                                  | Deterioration of the fish-species assemblage due to the human impact and the pike introduction as a measure for restoration of the Vlasinsko Reservoir (Serbia, Yugoslavia). Simonovic. 2000.                                                | Very high |
| 13                                             | 3.05 | In the taxon's introduced range, are there known adverse socio-economic impacts?                                                                                        | No                                                  | Deterioration of the fish-species assemblage due to the human impact and the pike introduction as a measure for restoration of the Vlasinsko Reservoir (Serbia, Yugoslavia). Simonovic. 2000.                                                | High      |
| B. Biology/Ecology                             |      |                                                                                                                                                                         |                                                     |                                                                                                                                                                                                                                              |           |
| 4. Undesirable (or persistence) traits         |      |                                                                                                                                                                         |                                                     |                                                                                                                                                                                                                                              |           |
| 14                                             | 4.01 | Is it likely that the taxon will be poisonous or pose other risks to human health?                                                                                      | No                                                  | Kottelat, M. and J. Freyhof, 2007. Handbook of European freshwater fishes. Publications Kottelat, Cornol and Freyhof,                                                                                                                        | Very high |
| 15                                             | 4.02 | Is it likely that the taxon will smother one or more native taxa (that are not threatened or protected)?                                                                | Yes                                                 | Deterioration of the fish-species assemblage due to the human impact and the pike introduction as a measure for restoration of the Vlasinsko Reservoir (Serbia, Yugoslavia). Simonovic. 2000.                                                | Medium    |
| 16                                             | 4.03 | Are there any threatened or protected taxa that the non-native taxon would parasitise in the RA area?                                                                   | No                                                  | Caarnivorus. Kottelat, M. and J. Freyhof, 2007. Handbook of European freshwater fishes. Publications Kottelat, Cornol and Freyhof, Berlin. 646 pp.                                                                                           | Very high |
| 17                                             | 4.04 | Is the taxon adaptable in terms of climatic and other environmental conditions, thus enhancing its potential persistence if it has invaded or could invade the RA area? | Yes                                                 | Deterioration of the fish-species assemblage due to the human impact and the pike introduction as a measure for restoration of the Vlasinsko Reservoir (Serbia, Yugoslavia). Simonovic. 2000.                                                | High      |
| 18                                             | 4.05 | Is the taxon likely to disrupt food-web structure/function in aquatic ecosystems if it has invaded or is likely to invade the RA                                        | Yes                                                 | Deterioration of the fish-species assemblage due to the human impact and the pike introduction as a measure for restoration of the Vlasinsko Reservoir (Serbia, Yugoslavia). Simonovic. 2000.                                                | Medium    |
| 19                                             | 4.06 | Is the taxon likely to exert adverse impacts on ecosystem services in the RA area?                                                                                      | No                                                  | Deterioration of the fish-species assemblage due to the human impact and the pike introduction as a measure for restoration of the Vlasinsko Reservoir (Serbia, Yugoslavia). Simonovic. 2000.                                                | High      |
| 20                                             | 4.07 | Is it likely that the taxon will host, and/or act as a vector for, recognised pests and infectious agents that are endemic in the RA                                    | Yes                                                 | Deterioration of the fish-species assemblage due to the human impact and the pike introduction as a measure for restoration of the Vlasinsko Reservoir (Serbia, Yugoslavia). Simonovic. 2000.                                                | High      |
| 21                                             | 4.08 | Is it likely that the taxon will host, and/or act as a vector for, recognised pests and infectious agents that are absent from (novel to) the RA area?                  | No                                                  | Occurrence of parasitic ciliates (Protozoa) on perch ( <i>Perca fluviatilis</i> ) in Lake Vlasinsko Vera P. Nikolic & Predrag D. Simonovic. 1996                                                                                             | High      |
| 22                                             | 4.09 | Is it likely that the taxon will achieve a body size that will make it more likely to be released from captivity?                                                       | Yes                                                 | Kottelat, M. and J. Freyhof, 2007. Handbook of European freshwater fishes. Publications Kottelat, Cornol and Freyhof, Berlin. 646 pp.                                                                                                        | High      |

|                                 |      |                                                                                                                                                                              |                |                                                                                                                                                                                                                                               |           |
|---------------------------------|------|------------------------------------------------------------------------------------------------------------------------------------------------------------------------------|----------------|-----------------------------------------------------------------------------------------------------------------------------------------------------------------------------------------------------------------------------------------------|-----------|
| 23                              | 4.10 | Is the taxon capable of sustaining itself in a range of water velocity conditions (e.g. versatile in habitat use)?                                                           | No             | Kottelat, M. and J. Freyhof, 2007. Handbook of European freshwater fishes. Publications Kottelat, Cornol and Freyhof, Berlin. 646 pp.                                                                                                         | High      |
| 24                              | 4.11 | Is it likely that the taxon's mode of existence (e.g. excretion of by-products) or behaviours (e.g. feeding) will reduce habitat quality for native taxa?                    | No             | Kottelat, M. and J. Freyhof, 2007. Handbook of European freshwater fishes. Publications Kottelat, Cornol and Freyhof, Berlin. 646 pp.                                                                                                         | High      |
| 25                              | 4.12 | Is the taxon likely to maintain a viable population even when present in low densities (or persisting in adverse conditions by way of a dormant form)?                       | No             | <a href="http://solair.eunet.rs/~vlaxym/Vlasinsko%20jezero.htm">http://solair.eunet.rs/~vlaxym/Vlasinsko%20jezero.htm</a>                                                                                                                     | High      |
| <b>5. Resource exploitation</b> |      |                                                                                                                                                                              |                |                                                                                                                                                                                                                                               |           |
| 26                              | 5.01 | Is the taxon likely to consume threatened or protected native taxa in the RA area?                                                                                           | Yes            | Deterioration of the fish-species assemblage due to the human impact and the pike introduction as a measure for restoration of the Vlasinsko Reservoir (Serbia, Yugoslavia). Simonovic. 2000.                                                 | High      |
| 27                              | 5.02 | Is the taxon likely to sequester food resources (including nutrients) to the detriment of native taxa in the RA area?                                                        | No             | <a href="http://solair.eunet.rs/~vlaxym/Vlasinsko%20jezero.htm">http://solair.eunet.rs/~vlaxym/Vlasinsko%20jezero.htm</a>                                                                                                                     | High      |
| <b>6. Reproduction</b>          |      |                                                                                                                                                                              |                |                                                                                                                                                                                                                                               |           |
| 28                              | 6.01 | Is the taxon likely to exhibit parental care and/or to reduce age-at-maturity in response to environmental conditions?                                                       | Yes            | No data.                                                                                                                                                                                                                                      | Medium    |
| 29                              | 6.02 | Is the taxon likely to produce viable gametes or propagules (in the RA area)?                                                                                                | Yes            | <a href="http://solair.eunet.rs/~vlaxym/Vlasinsko%20jezero.htm">http://solair.eunet.rs/~vlaxym/Vlasinsko%20jezero.htm</a>                                                                                                                     | High      |
| 30                              | 6.03 | Is the taxon likely to hybridise naturally with native taxa?                                                                                                                 | Yes            | Historical demography of brown trout ( <i>Salmo trutta</i> ) in the Adriatic drainage including the putative <i>S. letnica</i> endemic to Lake Ohrid Simona Sus`nik a,b, Ales` Snoj b, Iain F. Wilson c, Danilo Mrdak d, Steven Weiss a. 2007 | High      |
| 31                              | 6.04 | Is the taxon likely to be hermaphroditic or to display asexual reproduction?                                                                                                 | No             | Kottelat, M. and J. Freyhof, 2007. Handbook of European freshwater fishes. Publications Kottelat, Cornol and Freyhof, Berlin. 646 pp.                                                                                                         | High      |
| 32                              | 6.05 | Is the taxon dependent on the presence of another taxon (or specific habitat features) to complete its life cycle?                                                           | No             | Kottelat, M. and J. Freyhof, 2007. Handbook of European freshwater fishes. Publications Kottelat, Cornol and Freyhof, Berlin. 646 pp.                                                                                                         | High      |
| 33                              | 6.06 | Is the taxon known (or likely) to produce a large number of propagules or offspring within a short time span (e.g. < 1 year)?                                                | Yes            | Kottelat, M. and J. Freyhof, 2007. Handbook of European freshwater fishes. Publications Kottelat, Cornol and Freyhof, Berlin. 646 pp.                                                                                                         | High      |
| 34                              | 6.07 | How many time units (days, months, years) does the taxon require to reach the age-at-first-reproduction?                                                                     | 6              | Kottelat, M. and J. Freyhof, 2007. Handbook of European freshwater fishes. Publications Kottelat, Cornol and Freyhof, Berlin. 646 pp.                                                                                                         | Very high |
| <b>7. Dispersal mechanisms</b>  |      |                                                                                                                                                                              |                |                                                                                                                                                                                                                                               |           |
| 35                              | 7.01 | How many potential internal vectors/pathways could the taxon use to disperse within the RA area (with suitable protected areas (e.g. MCZ, MPA, SSSI)?                        | One            | Stocking. Kottelat, M. and J. Freyhof, 2007. Handbook of European freshwater fishes. Publications Kottelat, Cornol and Freyhof, Berlin. 646 pp.                                                                                               | Very high |
| 36                              | 7.02 | Will any of these vectors/pathways bring the taxon in close proximity to one or more protected areas (e.g. MCZ, MPA, SSSI)?                                                  | No             | Deterioration of the fish-species assemblage due to the human impact and the pike introduction as a measure for restoration of the Vlasinsko Reservoir (Serbia, Yugoslavia). Simonovic. 2000.                                                 | Very high |
| 37                              | 7.03 | Does the taxon have a means of actively attaching itself to hard substrata (e.g. ship hulls, pilings, buoys) such that it enhances the likelihood of dispersal?              | No             | Kottelat, M. and J. Freyhof, 2007. Handbook of European freshwater fishes. Publications Kottelat, Cornol and Freyhof, Berlin. 646 pp.                                                                                                         | Very high |
| 38                              | 7.04 | Is natural dispersal of the taxon likely to occur as eggs (for animals) or as propagules (for plants: seeds, spores) in the RA area?                                         | No             | Kottelat, M. and J. Freyhof, 2007. Handbook of European freshwater fishes. Publications Kottelat, Cornol and Freyhof, Berlin. 646 pp.                                                                                                         | Very high |
| 39                              | 7.05 | Is natural dispersal of the taxon likely to occur as larvae/juveniles (for animals) or as fragments/seedlings (for plants) in the RA area?                                   | Yes            | Kottelat, M. and J. Freyhof, 2007. Handbook of European freshwater fishes. Publications Kottelat, Cornol and Freyhof, Berlin. 646 pp.                                                                                                         | High      |
| 40                              | 7.06 | Are older life stages of the taxon likely to migrate in the RA area for reproduction?                                                                                        | Yes            | Kottelat, M. and J. Freyhof, 2007. Handbook of European freshwater fishes. Publications Kottelat, Cornol and Freyhof, Berlin. 646 pp.                                                                                                         | High      |
| 41                              | 7.07 | Are propagules or eggs of the taxon likely to be dispersed in the RA area by other animals?                                                                                  | No             | No attachable structures                                                                                                                                                                                                                      | Very high |
| 42                              | 7.08 | Is dispersal of the taxon along any of the vectors/pathways mentioned in the previous seven questions (35-41; i.e. both unintentional or intentional) likely to be           | No             | <a href="http://solair.eunet.rs/~vlaxym/Vlasinsko%20jezero.htm">http://solair.eunet.rs/~vlaxym/Vlasinsko%20jezero.htm</a>                                                                                                                     | High      |
| 43                              | 7.09 | Is dispersal of the taxon density dependent?                                                                                                                                 | No             | <a href="http://solair.eunet.rs/~vlaxym/Vlasinsko%20jezero.htm">http://solair.eunet.rs/~vlaxym/Vlasinsko%20jezero.htm</a>                                                                                                                     | High      |
| <b>8. Tolerance attributes</b>  |      |                                                                                                                                                                              |                |                                                                                                                                                                                                                                               |           |
| 44                              | 8.01 | Is the taxon able to withstand being out of water for extended periods (e.g. minimum of one or more hours) at some stage of its life cycle?                                  | No             | THE IMPACT OF ENVIRONMENTAL CONDITIONS ON GROWTH AND DEVELOPMENT OF SALMO LETNICA SMOLT Viola Prifti1 & Arefi Cake 2017                                                                                                                       | Very high |
| 45                              | 8.02 | Is the taxon tolerant of a wide range of water quality conditions relevant to that taxon? [In the Justification field, indicate the relevant water quality variable(s) being | No             | THE IMPACT OF ENVIRONMENTAL CONDITIONS ON GROWTH AND DEVELOPMENT OF SALMO LETNICA SMOLT Viola Prifti1 & Arefi Cake2                                                                                                                           | Very high |
| 46                              | 8.03 | Can the taxon be controlled or eradicated in the wild with chemical, biological, or other agents/means?                                                                      | Not applicable | THE IMPACT OF ENVIRONMENTAL CONDITIONS ON GROWTH AND DEVELOPMENT OF SALMO LETNICA SMOLT Viola Prifti1 & Arefi Cake2                                                                                                                           | Very high |
| 47                              | 8.04 | Is the taxon likely to tolerate or benefit from environmental/human disturbance?                                                                                             | No             | CHANGES IN THE SPAWNING ECOLOGY OF THE LAKE OHRID TROUT, <i>Salmo letnica</i> (Karaman) Zoran SPIRKOVSKI                                                                                                                                      | Very high |
| 48                              | 8.05 | Is the taxon able to tolerate salinity levels that are higher or lower than those found in its usual environment?                                                            | Yes            | Probably, anadromous relatives                                                                                                                                                                                                                | High      |
| 49                              | 8.06 | Are there effective natural enemies (predators) of the taxon present in the RA area?                                                                                         | Yes            | Deterioration of the fish-species assemblage due to the human impact and the pike introduction as a measure for restoration of the Vlasinsko Reservoir (Serbia, Yugoslavia). Simonovic. 2000.                                                 | High      |
| <b>C. Climate change</b>        |      |                                                                                                                                                                              |                |                                                                                                                                                                                                                                               |           |
| <b>9. Climate change</b>        |      |                                                                                                                                                                              |                |                                                                                                                                                                                                                                               |           |

|    |      |                                                                                                                                                              |           |                                                                                                   |      |
|----|------|--------------------------------------------------------------------------------------------------------------------------------------------------------------|-----------|---------------------------------------------------------------------------------------------------|------|
| 50 | 9.01 | Under the predicted future climatic conditions, are the risks of entry into the RA area posed by the taxon likely to increase, decrease or not change?       | No change | CHANGES IN THE SPAWNING ECOLOGY OF THE LAKE OHRID TROUT, Salmo letnica (Karaman) Zoran SPIRKOVSKI | High |
| 51 | 9.02 | Under the predicted future climatic conditions, are the risks of establishment posed by the taxon likely to increase, decrease or not change?                | Decrease  | CHANGES IN THE SPAWNING ECOLOGY OF THE LAKE OHRID TROUT, Salmo letnica (Karaman) Zoran SPIRKOVSKI | High |
| 52 | 9.03 | Under the predicted future climatic conditions, are the risks of dispersal within the RA area posed by the taxon likely to increase, decrease or not change? | Decrease  | CHANGES IN THE SPAWNING ECOLOGY OF THE LAKE OHRID TROUT, Salmo letnica (Karaman) Zoran SPIRKOVSKI | High |
| 53 | 9.04 | Under the predicted future climatic conditions, what is the likely magnitude of future potential impacts on biodiversity and/or ecological integrity/status? | Lower     | CHANGES IN THE SPAWNING ECOLOGY OF THE LAKE OHRID TROUT, Salmo letnica (Karaman) Zoran SPIRKOVSKI | High |
| 54 | 9.05 | Under the predicted future climatic conditions, what is the likely magnitude of future potential impacts on ecosystem structure and/or function?             | Lower     | CHANGES IN THE SPAWNING ECOLOGY OF THE LAKE OHRID TROUT, Salmo letnica (Karaman) Zoran SPIRKOVSKI | High |
| 55 | 9.06 | Under the predicted future climatic conditions, what is the likely magnitude of future potential impacts on ecosystem services/socio-economic factors?       | Lower     | CHANGES IN THE SPAWNING ECOLOGY OF THE LAKE OHRID TROUT, Salmo letnica (Karaman) Zoran SPIRKOVSKI | High |

| Statistics                                     |              |
|------------------------------------------------|--------------|
| Scores                                         |              |
| <b>BRA</b>                                     | <b>18.0</b>  |
| <b>BRA Outcome</b>                             | <b>-</b>     |
| <b>BRA+CCA</b>                                 | <b>8.0</b>   |
| <b>BRA+CCA Outcome</b>                         | <b>-</b>     |
| Score partition                                |              |
| <b>A. Biogeography/Historical</b>              | <b>7.0</b>   |
| 1. Domestication/Cultivation                   | 4.0          |
| 2. Climate, distribution and introduction risk | 1.0          |
| 3. Invasive elsewhere                          | 2.0          |
| <b>B. Biology/Ecology</b>                      | <b>11.0</b>  |
| 4. Undesirable (or persistence) traits         | 5.0          |
| 5. Resource exploitation                       | 5.0          |
| 6. Reproduction                                | 3.0          |
| 7. Dispersal mechanisms                        | -1.0         |
| 8. Tolerance attributes                        | -1.0         |
| <b>C. Climate change</b>                       | <b>-10.0</b> |
| 9. Climate change                              | -10.0        |
| Answered Questions                             |              |
| <b>Total</b>                                   | <b>55</b>    |
| <b>A. Biogeography/Historical</b>              | <b>13</b>    |
| 1. Domestication/Cultivation                   | 3            |
| 2. Climate, distribution and introduction risk | 5            |
| 3. Invasive elsewhere                          | 5            |
| <b>B. Biology/Ecology</b>                      | <b>36</b>    |
| 4. Undesirable (or persistence) traits         | 12           |
| 5. Resource exploitation                       | 2            |
| 6. Reproduction                                | 7            |
| 7. Dispersal mechanisms                        | 9            |
| 8. Tolerance attributes                        | 6            |
| <b>C. Climate change</b>                       | <b>6</b>     |
| 9. Climate change                              | 6            |
| Sectors affected                               |              |
| <b>Commercial</b>                              | <b>2</b>     |
| <b>Environmental</b>                           | <b>2</b>     |
| <b>Species or population nuisance traits</b>   | <b>5</b>     |

| Thresholds     |             |
|----------------|-------------|
| <b>BRA</b>     | <b>-</b>    |
| <b>BRA+CCA</b> | <b>-</b>    |
| Confidence     |             |
| <b>BRA+CCA</b> | <b>0.82</b> |
| <b>BRA</b>     | <b>0.83</b> |
| <b>CCA</b>     | <b>0.75</b> |

| Date and Time       |  |
|---------------------|--|
| 15/05/2021 19:47:19 |  |

## AS-ISK v2

| Taxon and Assessor details         |                                         |
|------------------------------------|-----------------------------------------|
| Category                           | Fishes and Lampreys (freshwater)        |
| Taxon name                         | <i>Salmo letnica</i>                    |
| Common name                        | Ohrid trout                             |
| Assessor                           | Ivan Špelić                             |
| Risk screening context             |                                         |
| Reason and socio-economic benefits |                                         |
| Risk assessment area               | Danube & Adriatic basins BA, HR, ME, RS |
| Taxonomy                           |                                         |
| Native range                       |                                         |
| Introduced range                   |                                         |
| URL                                |                                         |

|                                                |      | Response                                                                                                                                                         | Justification (references and/or other information) | Confidence                                                                                                                                                                                                                                                                                                                                                                                                                                         |           |
|------------------------------------------------|------|------------------------------------------------------------------------------------------------------------------------------------------------------------------|-----------------------------------------------------|----------------------------------------------------------------------------------------------------------------------------------------------------------------------------------------------------------------------------------------------------------------------------------------------------------------------------------------------------------------------------------------------------------------------------------------------------|-----------|
| A. Biogeography/Historical                     |      |                                                                                                                                                                  |                                                     |                                                                                                                                                                                                                                                                                                                                                                                                                                                    |           |
| 1. Domestication/Cultivation                   |      |                                                                                                                                                                  |                                                     |                                                                                                                                                                                                                                                                                                                                                                                                                                                    |           |
| 1                                              | 1.01 | Has the taxon been the subject of domestication (or cultivation) for at least 20 generations?                                                                    | Yes                                                 | National Aquaculture Sector Overview. Albania. National Aquaculture Sector Overview Fact Sheets. Text by Cobani, M. In: FAO Fisheries Division [online]. Rome. Updated . [Cited 5 May 2021].                                                                                                                                                                                                                                                       | Very high |
| 2                                              | 1.02 | Is the taxon harvested in the wild and likely to be sold or used in its live form?                                                                               | Yes                                                 | Fuller, P. and Daniel, W.M., 2021, Salmo letnica (Karaman, 1924): U.S. Geological Survey, Nonindigenous Aquatic Species Database, Harvested for aquaculture purposes (Gainesville, FL, https://nas.er.usgs.gov/queries/factsheet.aspx?SpeciesID=925, Revision Date: 7/11/2019, Peer Review Date: 7/11/2019, Access Date: 5/5/2021)                                                                                                                 | Very high |
| 3                                              | 1.03 | Does the taxon have invasive races, varieties, sub-taxa or congeners?                                                                                            | Yes                                                 | Salmo trutta (CABI, fishbase).                                                                                                                                                                                                                                                                                                                                                                                                                     | Very high |
| 2. Climate, distribution and introduction risk |      |                                                                                                                                                                  |                                                     |                                                                                                                                                                                                                                                                                                                                                                                                                                                    |           |
| 4                                              | 2.01 | How similar are the climatic conditions of the Risk Assessment (RA) area and the taxon's native range?                                                           | High                                                | Climatch software, calculated as in https://dpiipwe.tas.gov.au/Documents/Risk%20assessment%20methodology_wildlife%20imports%20August%202017.pdf                                                                                                                                                                                                                                                                                                    | Low       |
| 5                                              | 2.02 | What is the quality of the climate matching data?                                                                                                                | Low                                                 | No meteorological stations near lake Ohrid, based on two stations in vicinity (Climatch).                                                                                                                                                                                                                                                                                                                                                          | Very high |
| 6                                              | 2.03 | Is the taxon already present outside of captivity in the RA area?                                                                                                | Yes                                                 | Vlasinsko lake in Serbia, no recent evidence of establishment (https://www.fws.gov/fisheries/ans/erss/uncertainrisk/ERSS-Salmo-letnica-final-May2018.pdf).                                                                                                                                                                                                                                                                                         | Low       |
| 7                                              | 2.04 | How many potential vectors could the taxon use to enter in the RA area?                                                                                          | Not applicable                                      | Already present.                                                                                                                                                                                                                                                                                                                                                                                                                                   | Low       |
| 8                                              | 2.05 | Is the taxon currently found in close proximity to, and likely to enter into, the RA area in the near future (e.g. unintentional and intentional introductions)? | Not applicable                                      | Already present.                                                                                                                                                                                                                                                                                                                                                                                                                                   | Low       |
| 3. Invasive elsewhere                          |      |                                                                                                                                                                  |                                                     |                                                                                                                                                                                                                                                                                                                                                                                                                                                    |           |
| 9                                              | 3.01 | Has the taxon become naturalised (established viable populations) outside its native range?                                                                      | Yes                                                 | Fuller (2018) shows an established population of S. letnica at Pathfinder Reservoir in Natrona County, Wyoming (https://www.fws.gov/fisheries/ans/erss/uncertainrisk/ERSS-Salmo-letnica-final-May2018.pdf)                                                                                                                                                                                                                                         | High      |
| 10                                             | 3.02 | In the taxon's introduced range, are there known adverse impacts to wild stocks or commercial taxa?                                                              | Yes                                                 | Hybridization with native species (Zenetos, A., M.-A. Pancucci-Papadopoulou, S. Zogaris, E. Papastergiadou, L. Vardakas, K. Aligizaki, and A. N. Economou. 2009. Aquatic alien species in Greece (2009): tracking sources, patterns and effects on the ecosystem. Journal of Biological ResearchThessaloniki 12:135-145).                                                                                                                          | High      |
| 11                                             | 3.03 | In the taxon's introduced range, are there known adverse impacts to aquaculture?                                                                                 | No                                                  | The impacts of this species are currently unknown, as no studies have been done to determine how it has affected ecosystems in the invaded range (Fuller, P. and Daniel, W.M., 2021, Salmo letnica (Karaman, 1924): U.S. Geological Survey, Nonindigenous Aquatic Species Database, Gainesville, FL, https://nas.er.usgs.gov/queries/factsheet.aspx?SpeciesID=925, Revision Date: 7/11/2019, Peer Review Date: 7/11/2019, Access Date: 5/17/2021). | Low       |
| 12                                             | 3.04 | In the taxon's introduced range, are there known adverse impacts to ecosystem services?                                                                          | No                                                  | The impacts of this species are currently unknown, as no studies have been done to determine how it has affected ecosystems in the invaded range (Fuller, P. and Daniel, W.M., 2021, Salmo letnica (Karaman, 1924): U.S. Geological Survey, Nonindigenous Aquatic Species Database, Gainesville, FL, https://nas.er.usgs.gov/queries/factsheet.aspx?SpeciesID=925, Revision Date: 7/11/2019, Peer Review Date: 7/11/2019, Access Date: 5/17/2021). | Low       |
| 13                                             | 3.05 | In the taxon's introduced range, are there known adverse socio-economic impacts?                                                                                 | No                                                  | The impacts of this species are currently unknown, as no studies have been done to determine how it has affected ecosystems in the invaded range (Fuller, P. and Daniel, W.M., 2021, Salmo letnica (Karaman, 1924): U.S. Geological Survey, Nonindigenous Aquatic Species Database, Gainesville, FL, https://nas.er.usgs.gov/queries/factsheet.aspx?SpeciesID=925, Revision Date: 7/11/2019, Peer Review Date: 7/11/2019, Access Date: 5/17/2021). | Low       |
| B. Biology/Ecology                             |      |                                                                                                                                                                  |                                                     |                                                                                                                                                                                                                                                                                                                                                                                                                                                    |           |
| 4. Undesirable (or persistence) traits         |      |                                                                                                                                                                  |                                                     |                                                                                                                                                                                                                                                                                                                                                                                                                                                    |           |
| 14                                             | 4.01 | Is it likely that the taxon will be poisonous or pose other risks to human health?                                                                               | No                                                  | Harmless (Froese, R. and D. Pauly. Editors. 2021.FishBase. World Wide Web electronic publication. www.fishbase.org, ( 02/2021 )).                                                                                                                                                                                                                                                                                                                  | Very high |
| 15                                             | 4.02 | Is it likely that the taxon will smother one or more native taxa (that are not threatened or protected)?                                                         | No                                                  | The impacts of this species are currently unknown, as no studies have been done to determine how it has affected ecosystems in the invaded range (Fuller, P. and Daniel, W.M., 2021, Salmo letnica (Karaman, 1924): U.S. Geological Survey, Nonindigenous Aquatic Species Database, Gainesville, FL, https://nas.er.usgs.gov/queries/factsheet.aspx?SpeciesID=925, Revision Date: 7/11/2019, Peer Review Date: 7/11/2019, Access Date: 5/17/2021). | Low       |

|                                 |      |                                                                                                                                                                         |                |                                                                                                                                                                                                                                                                                                                                                                                                                                                                                                                                |           |
|---------------------------------|------|-------------------------------------------------------------------------------------------------------------------------------------------------------------------------|----------------|--------------------------------------------------------------------------------------------------------------------------------------------------------------------------------------------------------------------------------------------------------------------------------------------------------------------------------------------------------------------------------------------------------------------------------------------------------------------------------------------------------------------------------|-----------|
| 16                              | 4.03 | Are there any threatened or protected taxa that the non-native taxon would parasitise in the RA area?                                                                   | No             | No parasitic behaviour (Kottelat & Freyhof 2008).                                                                                                                                                                                                                                                                                                                                                                                                                                                                              | Very high |
| 17                              | 4.04 | Is the taxon adaptable in terms of climatic and other environmental conditions, thus enhancing its potential persistence if it has invaded or could invade the RA area? | No             | Not much data, only lacustrine forms, probably not tolerant to high temperatures as most salmonids.                                                                                                                                                                                                                                                                                                                                                                                                                            | Low       |
| 18                              | 4.05 | Is the taxon likely to disrupt food-web structure/function in aquatic ecosystems if it has invaded or is likely to invade the RA area?                                  | No             | The impacts of this species are currently unknown, as no studies have been done to determine how it has affected ecosystems in the invaded range (Fuller, P. and Daniel, W.M., 2021, Salmo letnica (Karaman, 1924): U.S. Geological Survey, Nonindigenous Aquatic Species Database, Gainesville, FL, <a href="https://nas.er.usgs.gov/queries/factsheet.aspx?SpeciesID=925">https://nas.er.usgs.gov/queries/factsheet.aspx?SpeciesID=925</a> , Revision Date: 7/11/2019, Peer Review Date: 7/11/2019, Access Date: 5/17/2021). | Low       |
| 19                              | 4.06 | Is the taxon likely to exert adverse impacts on ecosystem services in the RA area?                                                                                      | No             | The impacts of this species are currently unknown, as no studies have been done to determine how it has affected ecosystems in the invaded range (Fuller, P. and Daniel, W.M., 2021, Salmo letnica (Karaman, 1924): U.S. Geological Survey, Nonindigenous Aquatic Species Database, Gainesville, FL, <a href="https://nas.er.usgs.gov/queries/factsheet.aspx?SpeciesID=925">https://nas.er.usgs.gov/queries/factsheet.aspx?SpeciesID=925</a> , Revision Date: 7/11/2019, Peer Review Date: 7/11/2019, Access Date: 5/17/2021). | Low       |
| 20                              | 4.07 | Is it likely that the taxon will host, and/or act as a vector for, recognised pests and infectious agents that are endemic in the RA                                    | Yes            | Susceptible to parasites: <a href="https://www.fws.gov/fisheries/ans/erss/uncertainrisk/ERSS-Salmo-letnica-final-May2018.pdf">https://www.fws.gov/fisheries/ans/erss/uncertainrisk/ERSS-Salmo-letnica-final-May2018.pdf</a>                                                                                                                                                                                                                                                                                                    | High      |
| 21                              | 4.08 | Is it likely that the taxon will host, and/or act as a vector for, recognised pests and infectious agents that are absent from (novel to) the RA area?                  | Yes            | Susceptible to parasites: <a href="https://www.fws.gov/fisheries/ans/erss/uncertainrisk/ERSS-Salmo-letnica-final-May2018.pdf">https://www.fws.gov/fisheries/ans/erss/uncertainrisk/ERSS-Salmo-letnica-final-May2018.pdf</a>                                                                                                                                                                                                                                                                                                    | High      |
| 22                              | 4.09 | Is it likely that the taxon will achieve a body size that will make it more likely to be released from captivity?                                                       | Yes            | 76 cm, 6.5 kg (Torres, Armi G. in Froese, R. and D. Pauly. Editors. 2021.FishBase. World Wide Web electronic publication. <a href="http://www.fishbase.org">www.fishbase.org</a> , ( 02/2021 ))                                                                                                                                                                                                                                                                                                                                | Very high |
| 23                              | 4.10 | Is the taxon capable of sustaining itself in a range of water velocity conditions (e.g. versatile in habitat use)?                                                      | No             | Only lacustrine forms (Torres, Armi G. in Froese, R. and D. Pauly. Editors. 2021.FishBase. World Wide Web electronic publication. <a href="http://www.fishbase.org">www.fishbase.org</a> , ( 02/2021 ).                                                                                                                                                                                                                                                                                                                        | Medium    |
| 24                              | 4.11 | Is it likely that the taxon's mode of existence (e.g. excretion of by-products) or behaviours (e.g. feeding) will reduce habitat quality for native taxa?               | No             | The impacts of this species are currently unknown, as no studies have been done to determine how it has affected ecosystems in the invaded range (Fuller, P. and Daniel, W.M., 2021, Salmo letnica (Karaman, 1924): U.S. Geological Survey, Nonindigenous Aquatic Species Database, Gainesville, FL, <a href="https://nas.er.usgs.gov/queries/factsheet.aspx?SpeciesID=925">https://nas.er.usgs.gov/queries/factsheet.aspx?SpeciesID=925</a> , Revision Date: 7/11/2019, Peer Review Date: 7/11/2019, Access Date: 5/17/2021). | Low       |
| 25                              | 4.12 | Is the taxon likely to maintain a viable population even when present in low densities (or persisting in adverse conditions by way of a dormant form)?                  | No             | Low resilience and high vulnerability (Torres, Armi G. in Froese, R. and D. Pauly. Editors. 2021.FishBase. World Wide Web electronic publication. <a href="http://www.fishbase.org">www.fishbase.org</a> , ( 02/2021 ).                                                                                                                                                                                                                                                                                                        | Medium    |
| <b>5. Resource exploitation</b> |      |                                                                                                                                                                         |                |                                                                                                                                                                                                                                                                                                                                                                                                                                                                                                                                |           |
| 26                              | 5.01 | Is the taxon likely to consume threatened or protected native taxa in the RA area?                                                                                      | Yes            | Adults feed on zooplankton and fish (Kottelat, M. and J. Freyhof, 2007. Handbook of European freshwater fishes. Publications Kottelat, Cornol and Freyhof, Berlin. 646 pp.).                                                                                                                                                                                                                                                                                                                                                   | Medium    |
| 27                              | 5.02 | Is the taxon likely to sequester food resources (including nutrients) to the detriment of native taxa in the RA area?                                                   | Not applicable | No data for calculation.                                                                                                                                                                                                                                                                                                                                                                                                                                                                                                       | Very high |
| <b>6. Reproduction</b>          |      |                                                                                                                                                                         |                |                                                                                                                                                                                                                                                                                                                                                                                                                                                                                                                                |           |
| 28                              | 6.01 | Is the taxon likely to exhibit parental care and/or to reduce age-at-maturity in response to environmental conditions?                                                  | Yes            | Janković, D. and M. Raspopović (1960). Ohridska pastrmka (Salmo letnica typicus K.) pod promenjenim uslovima u Vlasinskom baražnom jezeru. Archives of Biological Sciences, 12,                                                                                                                                                                                                                                                                                                                                                | High      |
| 29                              | 6.02 | Is the taxon likely to produce viable gametes or propagules (in the RA area)?                                                                                           | Yes            | Janković, D. and M. Raspopović (1960). Ohridska pastrmka (Salmo letnica typicus K.) pod promenjenim uslovima u Vlasinskom baražnom jezeru. Archives of Biological Sciences, 12,                                                                                                                                                                                                                                                                                                                                                | High      |
| 30                              | 6.03 | Is the taxon likely to hybridise naturally with native taxa?                                                                                                            | Yes            | Hybrids with congeners found in Greece (Zenetos, A., M.-A. Pancucci-Papadopoulou, S. Zogaris, E. Papastergiadou, L. Vardakas, K. Aligizaki, and A. N. Economou. 2009. Aquatic alien species in Greece (2009): tracking sources, patterns and effects on the ecosystem. Journal of Biological ResearchThessaloniki                                                                                                                                                                                                              | Medium    |
| 31                              | 6.04 | Is the taxon likely to be hermaphroditic or to display asexual reproduction?                                                                                            | No             | No records for this species or congeners.                                                                                                                                                                                                                                                                                                                                                                                                                                                                                      | Very high |
| 32                              | 6.05 | Is the taxon dependent on the presence of another taxon (or specific habitat features) to complete its life cycle?                                                      | No             | Spawns in littoral and sublittoral areas (Kottelat, M., and J. Freyhof. 2007. Handbook of European freshwater fishes. Publications Kottelat, Cornol, Switzerland.).                                                                                                                                                                                                                                                                                                                                                            | Medium    |
| 33                              | 6.06 | Is the taxon known (or likely) to produce a large number of propagules or offspring within a short time span (e.g. < 1 year)?                                           | Yes            | 2500-3900 eggs per female (Janković, D. and M. Raspopović (1960). Ohridska pastrmka (Salmo letnica typicus K.) pod promenjenim uslovima u Vlasinskom baražnom jezeru. Archives of Biological Sciences, 12, 117-122.).                                                                                                                                                                                                                                                                                                          | High      |
| 34                              | 6.07 | How many time units (days, months, years) does the taxon require to reach the age-at-first-reproduction?                                                                | 2              | 2-3 years in Vlasinsko lake where introduced, 5-6 years in native area (Janković, D. and M. Raspopović (1960). Ohridska pastrmka (Salmo letnica typicus K.) pod promenjenim uslovima u Vlasinskom baražnom jezeru. Archives of Biological Sciences, 12,                                                                                                                                                                                                                                                                        | Medium    |
| <b>7. Dispersal mechanisms</b>  |      |                                                                                                                                                                         |                |                                                                                                                                                                                                                                                                                                                                                                                                                                                                                                                                |           |
| 35                              | 7.01 | How many potential internal vectors/pathways could the taxon use to disperse within the RA area (with suitable                                                          | One            | Introduction for angling purposes.                                                                                                                                                                                                                                                                                                                                                                                                                                                                                             | Low       |
| 36                              | 7.02 | Will any of these vectors/pathways bring the taxon in close proximity to one or more protected areas (e.g. MCZ, MPA, SSSI)?                                             | No             | No further dispersions in the last 60 years.                                                                                                                                                                                                                                                                                                                                                                                                                                                                                   | Low       |
| 37                              | 7.03 | Does the taxon have a means of actively attaching itself to hard substrata (e.g. ship hulls, pilings, buoys) such that it enhances the likelihood of dispersal?         | No             | No such adaptations.                                                                                                                                                                                                                                                                                                                                                                                                                                                                                                           | Very high |

|                                |      |                                                                                                                                                                                           |                |                                                                                                                                                                                                                                                                                                                                                                                                                                                                                           |           |
|--------------------------------|------|-------------------------------------------------------------------------------------------------------------------------------------------------------------------------------------------|----------------|-------------------------------------------------------------------------------------------------------------------------------------------------------------------------------------------------------------------------------------------------------------------------------------------------------------------------------------------------------------------------------------------------------------------------------------------------------------------------------------------|-----------|
| 38                             | 7.04 | Is natural dispersal of the taxon likely to occur as eggs (for animals) or as propagules (for plants: seeds, spores) in the RA area?                                                      | No             | No evidence, no historical examples on self-dispersion.                                                                                                                                                                                                                                                                                                                                                                                                                                   | Medium    |
| 39                             | 7.05 | Is natural dispersal of the taxon likely to occur as larvae/juveniles (for animals) or as fragments/seedlings (for plants) in the RA area?                                                | No             | No evidence, no historical examples on self-dispersion.                                                                                                                                                                                                                                                                                                                                                                                                                                   | Medium    |
| 40                             | 7.06 | Are older life stages of the taxon likely to migrate in the RA area for reproduction?                                                                                                     | No             | Migrations within lake (could it be interpreted as migration?)                                                                                                                                                                                                                                                                                                                                                                                                                            | High      |
| 41                             | 7.07 | Are propagules or eggs of the taxon likely to be dispersed in the RA area by other animals?                                                                                               | No             | No evidence, no historical examples on such dispersal.                                                                                                                                                                                                                                                                                                                                                                                                                                    | Medium    |
| 42                             | 7.08 | Is dispersal of the taxon along any of the vectors/pathways mentioned in the previous seven questions (35–41; i.e. both unintentional or intentional) likely to be                        | Not applicable | No such dispersal.                                                                                                                                                                                                                                                                                                                                                                                                                                                                        | Very high |
| 43                             | 7.09 | Is dispersal of the taxon density dependent?                                                                                                                                              | No             | No evidence on any historical dispersal except human                                                                                                                                                                                                                                                                                                                                                                                                                                      | High      |
| <b>8. Tolerance attributes</b> |      |                                                                                                                                                                                           |                |                                                                                                                                                                                                                                                                                                                                                                                                                                                                                           |           |
| 44                             | 8.01 | Is the taxon able to withstand being out of water for extended periods (e.g. minimum of one or more hours) at some stage of its life cycle?                                               | No             | Vulnerable species (Fishbase), sensitive as other congeners.                                                                                                                                                                                                                                                                                                                                                                                                                              | Very high |
| 45                             | 8.02 | Is the taxon tolerant of a wide range of water quality conditions relevant to that taxon? [In the Justification field, indicate the relevant water quality variable(s) being considered.] | No             | High vulnerability (fishbase). The Ohrid trout faces extinction in its native lakes due to pollution (Fuller, P. and Daniel, W.M., 2021, <i>Salmo letnica</i> (Karaman, 1924): U.S. Geological Survey, Nonindigenous Aquatic Species Database, Gainesville, FL, <a href="https://nas.er.usgs.gov/queries/factsheet.aspx?SpeciesID=925">https://nas.er.usgs.gov/queries/factsheet.aspx?SpeciesID=925</a> , Revision Date: 7/11/2019, Peer Review Date: 7/11/2019, Access Date: 5/17/2021). | Very high |
| 46                             | 8.03 | Can the taxon be controlled or eradicated in the wild with chemical, biological, or other agents/means?                                                                                   | Not applicable | Not allowed.                                                                                                                                                                                                                                                                                                                                                                                                                                                                              | Very high |
| 47                             | 8.04 | Is the taxon likely to tolerate or benefit from environmental/human disturbance?                                                                                                          | No             | Threatened by habitat destruction ( <a href="https://www.fws.gov/fisheries/ans/erss/uncertainrisk/ERSS-Salmo-letnica-final-May2018.pdf">https://www.fws.gov/fisheries/ans/erss/uncertainrisk/ERSS-Salmo-letnica-final-May2018.pdf</a> ), vulnerable.                                                                                                                                                                                                                                      | Very high |
| 48                             | 8.05 | Is the taxon able to tolerate salinity levels that are higher or lower than those found in its usual environment?                                                                         | No             | No info, sensitive lacustrine species.                                                                                                                                                                                                                                                                                                                                                                                                                                                    | Medium    |
| 49                             | 8.06 | Are there effective natural enemies (predators) of the taxon present in the RA                                                                                                            | Yes            | Piscivorous mammals and birds (personal opinion).                                                                                                                                                                                                                                                                                                                                                                                                                                         | Medium    |
| <b>C. Climate change</b>       |      |                                                                                                                                                                                           |                |                                                                                                                                                                                                                                                                                                                                                                                                                                                                                           |           |
| <b>9. Climate change</b>       |      |                                                                                                                                                                                           |                |                                                                                                                                                                                                                                                                                                                                                                                                                                                                                           |           |
| 50                             | 9.01 | Under the predicted future climatic conditions, are the risks of entry into the RA area posed by the taxon likely to increase, decrease or not change?                                    | No change      | No self-dispersion noted, only introduction by human.                                                                                                                                                                                                                                                                                                                                                                                                                                     | Very high |
| 51                             | 9.02 | Under the predicted future climatic conditions, are the risks of establishment posed by the taxon likely to increase, decrease or not change?                                             | No change      | Not as sensitive to high temperatures, critical thermal maximum set at 29 deg. Celsius (Mackey, T., C.T. Hasler, and E.C. Enders. 2019. Summary of Temperature Metrics for Aquatic Invasive Fish Species in the Prairie Region. Can. Tech. Rep. Fish. Aquat. Sci.                                                                                                                                                                                                                         | Medium    |
| 52                             | 9.03 | Under the predicted future climatic conditions, are the risks of dispersal within the RA area posed by the taxon likely to increase, decrease or not change?                              | No change      | Dispersion dependent on human introductions in suitable lacustrine habitats. Not as sensitive to high temperatures, critical thermal maximum set at 29 deg. Celsius (Mackey, T., C.T. Hasler, and E.C. Enders. 2019. Summary of Temperature Metrics for Aquatic Invasive Fish Species in the Prairie Region. Can. Tech. Rep. Fish. Aquat. Sci. 3308: viii + 62 p.)                                                                                                                        | Medium    |
| 53                             | 9.04 | Under the predicted future climatic conditions, what is the likely magnitude of future potential impacts on biodiversity and/or ecological integrity/status?                              | No change      | No recognized impacts, so no change expected.                                                                                                                                                                                                                                                                                                                                                                                                                                             | Low       |
| 54                             | 9.05 | Under the predicted future climatic conditions, what is the likely magnitude of future potential impacts on ecosystem structure and/or function?                                          | No change      | No recognized impacts, so no change expected.                                                                                                                                                                                                                                                                                                                                                                                                                                             | Low       |
| 55                             | 9.06 | Under the predicted future climatic conditions, what is the likely magnitude of future potential impacts on ecosystem services/socio-economic factors?                                    | No change      | No recognized impacts, so no change expected.                                                                                                                                                                                                                                                                                                                                                                                                                                             | Low       |

| Statistics                                     |             |
|------------------------------------------------|-------------|
| Scores                                         |             |
| <b>BRA</b>                                     | <b>13.0</b> |
| <b>BRA Outcome</b>                             | <b>-</b>    |
| <b>BRA+CCA</b>                                 | <b>13.0</b> |
| <b>BRA+CCA Outcome</b>                         | <b>-</b>    |
| Score partition                                |             |
| <b>A. Biogeography/Historical</b>              | <b>11.0</b> |
| 1. Domestication/Cultivation                   | 4.0         |
| 2. Climate, distribution and introduction risk | 1.0         |
| 3. Invasive elsewhere                          | 6.0         |
| <b>B. Biology/Ecology</b>                      | <b>2.0</b>  |
| 4. Undesirable (or persistence) traits         | 2.0         |
| 5. Resource exploitation                       | 5.0         |
| 6. Reproduction                                | 4.0         |
| 7. Dispersal mechanisms                        | -5.0        |
| 8. Tolerance attributes                        | -4.0        |
| <b>C. Climate change</b>                       | <b>0.0</b>  |
| 9. Climate change                              | 0.0         |
| Answered Questions                             |             |
| <b>Total</b>                                   | <b>55</b>   |
| <b>A. Biogeography/Historical</b>              | <b>13</b>   |
| 1. Domestication/Cultivation                   | 3           |



|                                                       |           |
|-------------------------------------------------------|-----------|
| 2. <i>Climate, distribution and introduction risk</i> | 5         |
| 3. <i>Invasive elsewhere</i>                          | 5         |
| <b>B. Biology/Ecology</b>                             | <b>36</b> |
| 4. <i>Undesirable (or persistence) traits</i>         | 12        |
| 5. <i>Resource exploitation</i>                       | 2         |
| 6. <i>Reproduction</i>                                | 7         |
| 7. <i>Dispersal mechanisms</i>                        | 9         |
| 8. <i>Tolerance attributes</i>                        | 6         |
| <b>C. Climate change</b>                              | <b>6</b>  |
| 9. <i>Climate change</i>                              | 6         |
| <b>Sectors affected</b>                               |           |
| Commercial                                            | 8         |
| Environmental                                         | 5         |
| <b>Species or population nuisance traits</b>          | <b>1</b>  |

|                   |      |
|-------------------|------|
| <b>Thresholds</b> |      |
| BRA               | -    |
| BRA+CCA           | -    |
| <b>Confidence</b> |      |
| BRA+CCA           | 0.61 |
| BRA               | 0.63 |
| CCA               | 0.46 |

|                      |  |
|----------------------|--|
| <b>Date and Time</b> |  |
| 17/05/2021 12:56:09  |  |

## AS-ISK v2

| Taxon and Assessor details         |                                         |
|------------------------------------|-----------------------------------------|
| Category                           | Fishes and Lampreys (freshwater)        |
| Taxon name                         | <i>Salmo letnica</i>                    |
| Common name                        | Ohrid trout                             |
| Assessor                           | Tamara Kanjuh                           |
| Risk screening context             |                                         |
| Reason and socio-economic benefits |                                         |
| Risk assessment area               | Danube & Adriatic basins BA, HR, ME, RS |
| Taxonomy                           |                                         |
| Native range                       |                                         |
| Introduced range                   |                                         |
| URL                                |                                         |

|                                                |      | Response                                                                                                                                                                | Justification (references and/or other information) | Confidence                                                                                                                                                                                                                                                                                  |        |
|------------------------------------------------|------|-------------------------------------------------------------------------------------------------------------------------------------------------------------------------|-----------------------------------------------------|---------------------------------------------------------------------------------------------------------------------------------------------------------------------------------------------------------------------------------------------------------------------------------------------|--------|
| A. Biogeography/Historical                     |      |                                                                                                                                                                         |                                                     |                                                                                                                                                                                                                                                                                             |        |
| 1. Domestication/Cultivation                   |      |                                                                                                                                                                         |                                                     |                                                                                                                                                                                                                                                                                             |        |
| 1                                              | 1.01 | Has the taxon been the subject of domestication (or cultivation) for at least 20 generations?                                                                           | Yes                                                 | Fisheries: commercial; aquaculture: commercial; gamefish: yes (Froese&Pauly, 2017)                                                                                                                                                                                                          | High   |
| 2                                              | 1.02 | Is the taxon harvested in the wild and likely to be sold or used in its live form?                                                                                      | Yes                                                 | Fisheries: commercial; aquaculture: commercial; gamefish: yes (Froese&Pauly, 2017)                                                                                                                                                                                                          | High   |
| 3                                              | 1.03 | Does the taxon have invasive races, varieties, sub-taxa or congeners?                                                                                                   | No                                                  | No information found.                                                                                                                                                                                                                                                                       | Low    |
| 2. Climate, distribution and introduction risk |      |                                                                                                                                                                         |                                                     |                                                                                                                                                                                                                                                                                             |        |
| 4                                              | 2.01 | How similar are the climatic conditions of the Risk Assessment (RA) area and the taxon's native range?                                                                  | High                                                | Dfa, Dfb (Köppen–Geiger climate classification system)                                                                                                                                                                                                                                      | High   |
| 5                                              | 2.02 | What is the quality of the climate matching data?                                                                                                                       | High                                                | Köppen–Geiger climate classification system                                                                                                                                                                                                                                                 | High   |
| 6                                              | 2.03 | Is the taxon already present outside of captivity in the RA area?                                                                                                       | Yes                                                 | Lake Ohrid trout, <i>Salmo letnica</i> (Karaman, 1924), was heavily and repeatedly stocked from a hatchery into the Vlasina Lake in Southern Serbia in 1950s and 1960s [...] (Janković&Raspopović                                                                                           | High   |
| 7                                              | 2.04 | How many potential vectors could the taxon use to enter in the RA area?                                                                                                 | One                                                 | Intentional stocking.                                                                                                                                                                                                                                                                       | Medium |
| 8                                              | 2.05 | Is the taxon currently found in close proximity to, and likely to enter into, the RA area in the near future (e.g. unintentional and intentional introductions)?        | Yes                                                 | The lake Vlasina (Piria et al., 2017)                                                                                                                                                                                                                                                       | High   |
| 3. Invasive elsewhere                          |      |                                                                                                                                                                         |                                                     |                                                                                                                                                                                                                                                                                             |        |
| 9                                              | 3.01 | Has the taxon become naturalised (established viable populations) outside its native range?                                                                             | No                                                  | Since the late 1960s, roe was reintroduced almost every year, since it seems that this species did not naturalize in the reservoir, despite its fast growth and great yield (Piria et al., 2017).                                                                                           | High   |
| 10                                             | 3.02 | In the taxon's introduced range, are there known adverse impacts to wild stocks or commercial taxa?                                                                     | Yes                                                 | [...] the main problem is the risk of hybridization with the native Prespa trout <i>Salmo peristericus</i> Karaman, 1938 (Perdikaris et al., 2010).                                                                                                                                         | Medium |
| 11                                             | 3.03 | In the taxon's introduced range, are there known adverse impacts to aquaculture?                                                                                        | No                                                  | No information found.                                                                                                                                                                                                                                                                       | Low    |
| 12                                             | 3.04 | In the taxon's introduced range, are there known adverse impacts to ecosystem                                                                                           | No                                                  | No information found.                                                                                                                                                                                                                                                                       | Low    |
| 13                                             | 3.05 | In the taxon's introduced range, are there known adverse socio-economic impacts?                                                                                        | No                                                  | No informtion found.                                                                                                                                                                                                                                                                        | Low    |
| B. Biology/Ecology                             |      |                                                                                                                                                                         |                                                     |                                                                                                                                                                                                                                                                                             |        |
| 4. Undesirable (or persistence) traits         |      |                                                                                                                                                                         |                                                     |                                                                                                                                                                                                                                                                                             |        |
| 14                                             | 4.01 | Is it likely that the taxon will be poisonous or pose other risks to human health?                                                                                      | No                                                  | Harmless (Froese&Pauly, 2017)                                                                                                                                                                                                                                                               | High   |
| 15                                             | 4.02 | Is it likely that the taxon will smother one or more native taxa (that are not threatened or protected)?                                                                | Yes                                                 | [...] the introduction of <i>Salmo trutta</i> and <i>Salmo letnica</i> to Greek freshwaters (where different <i>Salmo</i> species exist) has resulted in harmful hybridizations that may prove detrimental to the native trout species in the long term (Crivelli et al., 1997; Economou et | Medium |
| 16                                             | 4.03 | Are there any threatened or protected taxa that the non-native taxon would parasitise in the RA area?                                                                   | No                                                  | No information found.                                                                                                                                                                                                                                                                       | Low    |
| 17                                             | 4.04 | Is the taxon adaptable in terms of climatic and other environmental conditions, thus enhancing its potential persistence if it has invaded or could invade the RA area? | No                                                  | No information found.                                                                                                                                                                                                                                                                       | Low    |
| 18                                             | 4.05 | Is the taxon likely to disrupt food-web structure/function in aquatic ecosystems if it has invaded or is likely to invade the RA                                        | No                                                  | No information found.                                                                                                                                                                                                                                                                       | Low    |
| 19                                             | 4.06 | Is the taxon likely to exert adverse impacts on ecosystem services in the RA area?                                                                                      | No                                                  | No information found.                                                                                                                                                                                                                                                                       | Low    |
| 20                                             | 4.07 | Is it likely that the taxon will host, and/or act as a vector for, recognised pests and infectious agents that are endemic in the RA                                    | No                                                  | No information found.                                                                                                                                                                                                                                                                       | Low    |
| 21                                             | 4.08 | Is it likely that the taxon will host, and/or act as a vector for, recognised pests and infectious agents that are absent from (novel to) the RA area?                  | No                                                  | No information found.                                                                                                                                                                                                                                                                       | Low    |
| 22                                             | 4.09 | Is it likely that the taxon will achieve a body size that will make it more likely to be released from captivity?                                                       | No                                                  | No information found.                                                                                                                                                                                                                                                                       | Low    |
| 23                                             | 4.10 | Is the taxon capable of sustaining itself in a range of water velocity conditions (e.g. versatile in habitat use)?                                                      | No                                                  | No information found.                                                                                                                                                                                                                                                                       | Low    |
| 24                                             | 4.11 | Is it likely that the taxon's mode of existence (e.g. excretion of by-products) or behaviours (e.g. feeding) will reduce habitat quality for native taxa?               | No                                                  | No information found.                                                                                                                                                                                                                                                                       | Low    |

|                                 |      |                                                                                                                                                                              |           |                                                                                                                                                                                                                                                                                                                                                                                                                                                                                                                                                                                                                                                                               |        |
|---------------------------------|------|------------------------------------------------------------------------------------------------------------------------------------------------------------------------------|-----------|-------------------------------------------------------------------------------------------------------------------------------------------------------------------------------------------------------------------------------------------------------------------------------------------------------------------------------------------------------------------------------------------------------------------------------------------------------------------------------------------------------------------------------------------------------------------------------------------------------------------------------------------------------------------------------|--------|
| 25                              | 4.12 | Is the taxon likely to maintain a viable population even when present in low densities (or persisting in adverse conditions by way of a dormant form)?                       | No        | No information found.                                                                                                                                                                                                                                                                                                                                                                                                                                                                                                                                                                                                                                                         | Low    |
| <b>5. Resource exploitation</b> |      |                                                                                                                                                                              |           |                                                                                                                                                                                                                                                                                                                                                                                                                                                                                                                                                                                                                                                                               |        |
| 26                              | 5.01 | Is the taxon likely to consume threatened or protected native taxa in the RA area?                                                                                           | No        | No information found.                                                                                                                                                                                                                                                                                                                                                                                                                                                                                                                                                                                                                                                         | Low    |
| 27                              | 5.02 | Is the taxon likely to sequester food resources (including nutrients) to the detriment of native taxa in the RA area?                                                        | No        | No information found.                                                                                                                                                                                                                                                                                                                                                                                                                                                                                                                                                                                                                                                         | Low    |
| <b>6. Reproduction</b>          |      |                                                                                                                                                                              |           |                                                                                                                                                                                                                                                                                                                                                                                                                                                                                                                                                                                                                                                                               |        |
| 28                              | 6.01 | Is the taxon likely to exhibit parental care and/or to reduce age-at-maturity in response to environmental conditions?                                                       | No        | No information found.                                                                                                                                                                                                                                                                                                                                                                                                                                                                                                                                                                                                                                                         | Medium |
| 29                              | 6.02 | Is the taxon likely to produce viable gametes or propagules (in the RA area)?                                                                                                | No        | It is not known whether this species hybridizes with the native brown trout, but from the regular roe imports over a long-term period, it appears that letnica trout were feral there and diminished after the cessation of reservoir stocking (Piria et al., [...]) the introduction of Salmo trutta and Salmo letnica to Greek freshwaters (where different Salmo species exist) has resulted in harmful hybridizations that may prove detrimental to the native trout species in the long term (Crivelli et al., 1997; Economou et al., 2007). Also, it is not known whether this species hybridizes with the native brown trout in Vlasinsko jezero (Piria et al., 2017). | Low    |
| 30                              | 6.03 | Is the taxon likely to hybridise naturally with native taxa?                                                                                                                 | No        | [...] the introduction of Salmo trutta and Salmo letnica to Greek freshwaters (where different Salmo species exist) has resulted in harmful hybridizations that may prove detrimental to the native trout species in the long term (Crivelli et al., 1997; Economou et al., 2007). Also, it is not known whether this species hybridizes with the native brown trout in Vlasinsko jezero (Piria et al., 2017).                                                                                                                                                                                                                                                                | Medium |
| 31                              | 6.04 | Is the taxon likely to be hermaphroditic or to display asexual reproduction?                                                                                                 | No        | No information found.                                                                                                                                                                                                                                                                                                                                                                                                                                                                                                                                                                                                                                                         | Low    |
| 32                              | 6.05 | Is the taxon dependent on the presence of another taxon (or specific habitat features) to complete its life cycle?                                                           | No        | No information found.                                                                                                                                                                                                                                                                                                                                                                                                                                                                                                                                                                                                                                                         | Low    |
| 33                              | 6.06 | Is the taxon known (or likely) to produce a large number of propagules or offspring within a short time span (e.g. < 1 year)?                                                | No        | No information found.                                                                                                                                                                                                                                                                                                                                                                                                                                                                                                                                                                                                                                                         | Low    |
| 34                              | 6.07 | How many time units (days, months, years) does the taxon require to reach the age-at-first-reproduction?                                                                     | 5         | Attains first sexual maturity at 5-6 years (Froese&Pauly, 2017).                                                                                                                                                                                                                                                                                                                                                                                                                                                                                                                                                                                                              | High   |
| <b>7. Dispersal mechanisms</b>  |      |                                                                                                                                                                              |           |                                                                                                                                                                                                                                                                                                                                                                                                                                                                                                                                                                                                                                                                               |        |
| 35                              | 7.01 | How many potential internal vectors/pathways could the taxon use to disperse within the RA area (with suitable vectors/pathways)?                                            | One       | Intentional stocking.                                                                                                                                                                                                                                                                                                                                                                                                                                                                                                                                                                                                                                                         | Low    |
| 36                              | 7.02 | Will any of these vectors/pathways bring the taxon in close proximity to one or more protected areas (e.g. MCZ, MPA, SSSI)?                                                  | Yes       | Introduction to Vlasina lake (Piria et al., 2017).                                                                                                                                                                                                                                                                                                                                                                                                                                                                                                                                                                                                                            | Low    |
| 37                              | 7.03 | Does the taxon have a means of actively attaching itself to hard substrata (e.g. ship hulls, pilings, buoys) such that it enhances the likelihood of dispersal?              | No        | No information found.                                                                                                                                                                                                                                                                                                                                                                                                                                                                                                                                                                                                                                                         | Low    |
| 38                              | 7.04 | Is natural dispersal of the taxon likely to occur as eggs (for animals) or as propagules (for plants: seeds, spores) in the RA area?                                         | No        | No information found.                                                                                                                                                                                                                                                                                                                                                                                                                                                                                                                                                                                                                                                         | Low    |
| 39                              | 7.05 | Is natural dispersal of the taxon likely to occur as larvae/juveniles (for animals) or as fragments/seedlings (for plants) in the RA area?                                   | Yes       | Dispersion as juvenile.                                                                                                                                                                                                                                                                                                                                                                                                                                                                                                                                                                                                                                                       | Low    |
| 40                              | 7.06 | Are older life stages of the taxon likely to migrate in the RA area for reproduction?                                                                                        | No        | Non-migratory species.                                                                                                                                                                                                                                                                                                                                                                                                                                                                                                                                                                                                                                                        | Low    |
| 41                              | 7.07 | Are propagules or eggs of the taxon likely to be dispersed in the RA area by other animals?                                                                                  | No        | No information found.                                                                                                                                                                                                                                                                                                                                                                                                                                                                                                                                                                                                                                                         | Low    |
| 42                              | 7.08 | Is dispersal of the taxon along any of the vectors/pathways mentioned in the previous seven questions (35-41; i.e. both unintentional or intentional) likely to be           | Yes       | Intentional stocking.                                                                                                                                                                                                                                                                                                                                                                                                                                                                                                                                                                                                                                                         | Low    |
| 43                              | 7.09 | Is dispersal of the taxon density dependent?                                                                                                                                 | No        | No information found.                                                                                                                                                                                                                                                                                                                                                                                                                                                                                                                                                                                                                                                         | Low    |
| <b>8. Tolerance attributes</b>  |      |                                                                                                                                                                              |           |                                                                                                                                                                                                                                                                                                                                                                                                                                                                                                                                                                                                                                                                               |        |
| 44                              | 8.01 | Is the taxon able to withstand being out of water for extended periods (e.g. minimum of one or more hours) at some stage of its life cycle?                                  | No        | The taxon cannot survive out of the water.                                                                                                                                                                                                                                                                                                                                                                                                                                                                                                                                                                                                                                    | Low    |
| 45                              | 8.02 | Is the taxon tolerant of a wide range of water quality conditions relevant to that taxon? [In the Justification field, indicate the relevant water quality variable(s) being | No        | The taxon is sensitive to environmental changes.                                                                                                                                                                                                                                                                                                                                                                                                                                                                                                                                                                                                                              | Low    |
| 46                              | 8.03 | Can the taxon be controlled or eradicated in the wild with chemical, biological, or other agents/means?                                                                      | No        | No information found.                                                                                                                                                                                                                                                                                                                                                                                                                                                                                                                                                                                                                                                         | Low    |
| 47                              | 8.04 | Is the taxon likely to tolerate or benefit from environmental/human disturbance?                                                                                             | No        | Threatened by habitat destruction, overfishing and introduction of new species (Crivelli, 1996).                                                                                                                                                                                                                                                                                                                                                                                                                                                                                                                                                                              | High   |
| 48                              | 8.05 | Is the taxon able to tolerate salinity levels that are higher or lower than those found in its usual environment?                                                            | No        | The taxon is sensitive to environmental conditions.                                                                                                                                                                                                                                                                                                                                                                                                                                                                                                                                                                                                                           | Low    |
| 49                              | 8.06 | Are there effective natural enemies (predators) of the taxon present in the RA                                                                                               | No        | No information found.                                                                                                                                                                                                                                                                                                                                                                                                                                                                                                                                                                                                                                                         | Low    |
| <b>C. Climate change</b>        |      |                                                                                                                                                                              |           |                                                                                                                                                                                                                                                                                                                                                                                                                                                                                                                                                                                                                                                                               |        |
| <b>9. Climate change</b>        |      |                                                                                                                                                                              |           |                                                                                                                                                                                                                                                                                                                                                                                                                                                                                                                                                                                                                                                                               |        |
| 50                              | 9.01 | Under the predicted future climatic conditions, are the risks of entry into the RA area posed by the taxon likely to increase, decrease or not change?                       | No change | The taxon is sensitive to environmental changes.                                                                                                                                                                                                                                                                                                                                                                                                                                                                                                                                                                                                                              | Low    |
| 51                              | 9.02 | Under the predicted future climatic conditions, are the risks of establishment posed by the taxon likely to increase, decrease or not change?                                | No change | The taxon is sensitive to environmental changes.                                                                                                                                                                                                                                                                                                                                                                                                                                                                                                                                                                                                                              | Low    |

|    |      |                                                                                                                                                              |           |                                                  |     |
|----|------|--------------------------------------------------------------------------------------------------------------------------------------------------------------|-----------|--------------------------------------------------|-----|
| 52 | 9.03 | Under the predicted future climatic conditions, are the risks of dispersal within the RA area posed by the taxon likely to increase, decrease or not change? | No change | The taxon is sensitive to environmental changes. | Low |
| 53 | 9.04 | Under the predicted future climatic conditions, what is the likely magnitude of future potential impacts on biodiversity and/or ecological integrity/status? | No change | The taxon is sensitive to environmental changes. | Low |
| 54 | 9.05 | Under the predicted future climatic conditions, what is the likely magnitude of future potential impacts on ecosystem structure and/or function?             | No change | The taxon is sensitive to environmental changes. | Low |
| 55 | 9.06 | Under the predicted future climatic conditions, what is the likely magnitude of future potential impacts on ecosystem services/socio-economic factors?       | No change | The taxon is sensitive to environmental changes. | Low |

| Statistics                                     |             |
|------------------------------------------------|-------------|
| Scores                                         |             |
| <b>BRA</b>                                     | <b>0.0</b>  |
| <b>BRA Outcome</b>                             | <b>-</b>    |
| <b>BRA+CCA</b>                                 | <b>0.0</b>  |
| <b>BRA+CCA Outcome</b>                         | <b>-</b>    |
| Score partition                                |             |
| <b>A. Biogeography/Historical</b>              | <b>5.0</b>  |
| 1. Domestication/Cultivation                   | 2.0         |
| 2. Climate, distribution and introduction risk | 1.0         |
| 3. Invasive elsewhere                          | 2.0         |
| <b>B. Biology/Ecology</b>                      | <b>-5.0</b> |
| 4. Undesirable (or persistence) traits         | 0.0         |
| 5. Resource exploitation                       | 0.0         |
| 6. Reproduction                                | -2.0        |
| 7. Dispersal mechanisms                        | -1.0        |
| 8. Tolerance attributes                        | -2.0        |
| <b>C. Climate change</b>                       | <b>0.0</b>  |
| 9. Climate change                              | 0.0         |
| Answered Questions                             |             |
| <b>Total</b>                                   | <b>55</b>   |
| <b>A. Biogeography/Historical</b>              | <b>13</b>   |
| 1. Domestication/Cultivation                   | 3           |
| 2. Climate, distribution and introduction risk | 5           |
| 3. Invasive elsewhere                          | 5           |
| <b>B. Biology/Ecology</b>                      | <b>36</b>   |
| 4. Undesirable (or persistence) traits         | 12          |
| 5. Resource exploitation                       | 2           |
| 6. Reproduction                                | 7           |
| 7. Dispersal mechanisms                        | 9           |
| 8. Tolerance attributes                        | 6           |
| <b>C. Climate change</b>                       | <b>6</b>    |
| 9. Climate change                              | 6           |
| Sectors affected                               |             |
| <b>Commercial</b>                              | <b>9</b>    |
| <b>Environmental</b>                           | <b>1</b>    |
| <b>Species or population nuisance traits</b>   | <b>-7</b>   |

| Thresholds     |             |
|----------------|-------------|
| <b>BRA</b>     | <b>-</b>    |
| <b>BRA+CCA</b> | <b>-</b>    |
| Confidence     |             |
| <b>BRA+CCA</b> | <b>0.36</b> |
| <b>BRA</b>     | <b>0.38</b> |
| <b>CCA</b>     | <b>0.25</b> |

| Date and Time       |  |
|---------------------|--|
| 31/05/2021 20:51:48 |  |

## AS-ISK v2

| Taxon and Assessor details         |                                         |
|------------------------------------|-----------------------------------------|
| Category                           | Fishes and Lampreys (freshwater)        |
| Taxon name                         | <i>Salmo letnica</i>                    |
| Common name                        | Ohrid trout                             |
| Assessor                           | Tena Radocaj                            |
| Risk screening context             |                                         |
| Reason and socio-economic benefits |                                         |
| Risk assessment area               | Danube & Adriatic basins BA, HR, ME, RS |
| Taxonomy                           |                                         |
| Native range                       |                                         |
| Introduced range                   |                                         |
| URL                                |                                         |

|                                                |      | Response                                                                                                                                                                | Justification (references and/or other information) | Confidence                                                                                                                                                                                                                                                                                              |           |
|------------------------------------------------|------|-------------------------------------------------------------------------------------------------------------------------------------------------------------------------|-----------------------------------------------------|---------------------------------------------------------------------------------------------------------------------------------------------------------------------------------------------------------------------------------------------------------------------------------------------------------|-----------|
| A. Biogeography/Historical                     |      |                                                                                                                                                                         |                                                     |                                                                                                                                                                                                                                                                                                         |           |
| 1. Domestication/Cultivation                   |      |                                                                                                                                                                         |                                                     |                                                                                                                                                                                                                                                                                                         |           |
| 1                                              | 1.01 | Has the taxon been the subject of domestication (or cultivation) for at least 20 generations?                                                                           | Yes                                                 | Fisheries: commercial; aquaculture: commercial; gamefish: yes (Fishbase)                                                                                                                                                                                                                                | Very high |
| 2                                              | 1.02 | Is the taxon harvested in the wild and likely to be sold or used in its live form?                                                                                      | Yes                                                 | gamefish: yes (Fishbase)                                                                                                                                                                                                                                                                                | Low       |
| 3                                              | 1.03 | Does the taxon have invasive races, varieties, sub-taxa or congeners?                                                                                                   | Yes                                                 | Salmo trutta                                                                                                                                                                                                                                                                                            | Very high |
| 2. Climate, distribution and introduction risk |      |                                                                                                                                                                         |                                                     |                                                                                                                                                                                                                                                                                                         |           |
| 4                                              | 2.01 | How similar are the climatic conditions of the Risk Assessment (RA) area and the taxon's native range?                                                                  | Medium                                              | The similarity between climatic conditions RA area and native range is medium. I use climatch.                                                                                                                                                                                                          | Very high |
| 5                                              | 2.02 | What is the quality of the climate matching data?                                                                                                                       | Medium                                              | Distribution Map of IUCN and Climatch                                                                                                                                                                                                                                                                   | Medium    |
| 6                                              | 2.03 | Is the taxon already present outside of captivity in the RA area?                                                                                                       | Yes                                                 | S. letnica is present outside of captivity in the RA area. (Piria et al., 2018)                                                                                                                                                                                                                         | Very high |
| 7                                              | 2.04 | How many potential vectors could the taxon use to enter in the RA area?                                                                                                 | Not applicable                                      | S. letnica is present in the RA area.                                                                                                                                                                                                                                                                   | Very high |
| 8                                              | 2.05 | Is the taxon currently found in close proximity to, and likely to enter into, the RA area in the near future (e.g. unintentional and intentional introductions)?        | Not applicable                                      | S. letnica is present in the RA area.                                                                                                                                                                                                                                                                   | Very high |
| 3. Invasive elsewhere                          |      |                                                                                                                                                                         |                                                     |                                                                                                                                                                                                                                                                                                         |           |
| 9                                              | 3.01 | Has the taxon become naturalised (established viable populations) outside its native range?                                                                             | Yes                                                 | Greece (Perdikaris, C., Gouva, E., & Paschos, I. (2010). Alien fish and crayfish species in Hellenic freshwaters and aquaculture. Reviews in Aquaculture, 2(3), 111-120).                                                                                                                               | Medium    |
| 10                                             | 3.02 | In the taxon's introduced range, are there known adverse impacts to wild stocks or commercial taxa?                                                                     | No                                                  | No evidence, but probably they compete with native fish species.                                                                                                                                                                                                                                        | Low       |
| 11                                             | 3.03 | In the taxon's introduced range, are there known adverse impacts to aquaculture?                                                                                        | No                                                  | No evidence                                                                                                                                                                                                                                                                                             | High      |
| 12                                             | 3.04 | In the taxon's introduced range, are there known adverse impacts to ecosystem                                                                                           | No                                                  | No evidence                                                                                                                                                                                                                                                                                             | Low       |
| 13                                             | 3.05 | In the taxon's introduced range, are there known adverse socio-economic impacts?                                                                                        | No                                                  | No evidence                                                                                                                                                                                                                                                                                             | Low       |
| B. Biology/Ecology                             |      |                                                                                                                                                                         |                                                     |                                                                                                                                                                                                                                                                                                         |           |
| 4. Undesirable (or persistence) traits         |      |                                                                                                                                                                         |                                                     |                                                                                                                                                                                                                                                                                                         |           |
| 14                                             | 4.01 | Is it likely that the taxon will be poisonous or pose other risks to human health?                                                                                      | Yes                                                 | S. letnica is harmless (Fishbase)                                                                                                                                                                                                                                                                       | Very high |
| 15                                             | 4.02 | Is it likely that the taxon will smother one or more native taxa (that are not threatened or protected)?                                                                | No                                                  | No evidence                                                                                                                                                                                                                                                                                             | Low       |
| 16                                             | 4.03 | Are there any threatened or protected taxa that the non-native taxon would parasitise in the RA area?                                                                   | No                                                  | No                                                                                                                                                                                                                                                                                                      | Low       |
| 17                                             | 4.04 | Is the taxon adaptable in terms of climatic and other environmental conditions, thus enhancing its potential persistence if it has invaded or could invade the RA area? | Yes                                                 | S. macedonicus will be adaptable to climatic and other environmental conditions. (Kanjuh, T., Tomić, S., Marić, A., Jurlina, D. Š., Nikolić, V., & Simonović, P. Trout Salmo spp.(Salmoniformes: Salmonidae) Molecular Diversity in Streams on the Southern Slopes of the Stara Planina Mts. in Serbia) | Medium    |
| 18                                             | 4.05 | Is the taxon likely to disrupt food-web structure/function in aquatic ecosystems if it has invaded or is likely to invade the RA                                        | No                                                  | No evidence                                                                                                                                                                                                                                                                                             | Low       |
| 19                                             | 4.06 | Is the taxon likely to exert adverse impacts on ecosystem services in the RA area?                                                                                      | Yes                                                 | S. letnica no adverse impacts in the RA area.                                                                                                                                                                                                                                                           | Low       |
| 20                                             | 4.07 | Is it likely that the taxon will host, and/or act as a vector for, recognised pests and infectious agents that are endemic in the RA area?                              | Yes                                                 | Blazhekovikj-Dimovska, D., Stojanovski, S., & Hristovski, N. (2013). PARASITE FAUNA OF ENDEMIC FISHES (Salmo letnica Karaman, 1924 and Salmo ohridanus Steindachner 1892) FROM LAKE OHRID (MACEDONIA). Natura Montenegrina, 12(3-4), 761-                                                               | Very high |
| 21                                             | 4.08 | Is it likely that the taxon will host, and/or act as a vector for, recognised pests and infectious agents that are absent from (novel to) the RA area?                  | Yes                                                 | Blazhekovikj-Dimovska, D., Stojanovski, S., & Hristovski, N. (2013). PARASITE FAUNA OF ENDEMIC FISHES (Salmo letnica Karaman, 1924 and Salmo ohridanus Steindachner 1892) FROM LAKE OHRID (MACEDONIA). Natura Montenegrina, 12(3-4), 761-                                                               | Very high |
| 22                                             | 4.09 | Is it likely that the taxon will achieve a body size that will make it more likely to be released from captivity?                                                       | Yes                                                 | Max length : 76.0 cm TL (Fishbase)                                                                                                                                                                                                                                                                      | Medium    |
| 23                                             | 4.10 | Is the taxon capable of sustaining itself in a range of water velocity conditions (e.g. versatile in habitat use)?                                                      | No                                                  | Inhabits lakes. (Fishbase)                                                                                                                                                                                                                                                                              | Low       |
| 24                                             | 4.11 | Is it likely that the taxon's mode of existence (e.g. excretion of by-products) or behaviours (e.g. feeding) will reduce habitat quality for native taxa?               | No                                                  | No evidence                                                                                                                                                                                                                                                                                             | Low       |

|                                 |      |                                                                                                                                                                              |                |                                                                                                                                                                                                                                              |           |
|---------------------------------|------|------------------------------------------------------------------------------------------------------------------------------------------------------------------------------|----------------|----------------------------------------------------------------------------------------------------------------------------------------------------------------------------------------------------------------------------------------------|-----------|
| 25                              | 4.12 | Is the taxon likely to maintain a viable population even when present in low densities (or persisting in adverse conditions by way of a dormant form)?                       | No             | No evidence                                                                                                                                                                                                                                  | Low       |
| <b>5. Resource exploitation</b> |      |                                                                                                                                                                              |                |                                                                                                                                                                                                                                              |           |
| 26                              | 5.01 | Is the taxon likely to consume threatened or protected native taxa in the RA area?                                                                                           | Yes            | Adults prey fish, mainly Alburnus scoranza. (Fishbase)                                                                                                                                                                                       | Medium    |
| 27                              | 5.02 | Is the taxon likely to sequester food resources (including nutrients) to the detriment of native taxa in the RA area?                                                        | Not applicable | Not applicable                                                                                                                                                                                                                               | Very high |
| <b>6. Reproduction</b>          |      |                                                                                                                                                                              |                |                                                                                                                                                                                                                                              |           |
| 28                              | 6.01 | Is the taxon likely to exhibit parental care and/or to reduce age-at-maturity in response to environmental conditions?                                                       | No             | No evidence                                                                                                                                                                                                                                  | Low       |
| 29                              | 6.02 | Is the taxon likely to produce viable gametes or propagules (in the RA area)?                                                                                                | Yes            | Piria et al., 2018                                                                                                                                                                                                                           | Low       |
| 30                              | 6.03 | Is the taxon likely to hybridise naturally with native taxa?                                                                                                                 | Yes            | The risk of hybridization with the native Prespa trout Salmo peristericus (Perdikaris, C., Gouva, E., & Paschos, I. (2010). Alien fish and crayfish species in Hellenic freshwaters and aquaculture. Reviews in Aquaculture, 2(3), 111-120). | Very high |
| 31                              | 6.04 | Is the taxon likely to be hermaphroditic or to display asexual reproduction?                                                                                                 | No             | No evidence                                                                                                                                                                                                                                  | Low       |
| 32                              | 6.05 | Is the taxon dependent on the presence of another taxon (or specific habitat features) to complete its life cycle?                                                           | No             | No evidence                                                                                                                                                                                                                                  | Low       |
| 33                              | 6.06 | Is the taxon known (or likely) to produce a large number of propagules or offspring within a short time span (e.g. < 1 year)?                                                | No             | U.S. Fish and Wildlife Service, May 2011 Revised, October 2017, May 2018 Web Version, 5/17/2018                                                                                                                                              | Low       |
| 34                              | 6.07 | How many time units (days, months, years) does the taxon require to reach the age-at-first-reproduction?                                                                     | 5              | Attains first sexual maturity at 5-6 years (Fishbase)                                                                                                                                                                                        | Very high |
| <b>7. Dispersal mechanisms</b>  |      |                                                                                                                                                                              |                |                                                                                                                                                                                                                                              |           |
| 35                              | 7.01 | How many potential internal vectors/pathways could the taxon use to disperse within the RA area (with suitable vectors/pathways)?                                            | >1             | 1. human influence 2. natural spread via natural and manmade watercourses                                                                                                                                                                    | Medium    |
| 36                              | 7.02 | Will any of these vectors/pathways bring the taxon in close proximity to one or more protected areas (e.g. MCZ, MPA, SSSI)?                                                  | Yes            | Human influence                                                                                                                                                                                                                              | Low       |
| 37                              | 7.03 | Does the taxon have a means of actively attaching itself to hard substrata (e.g. ship hulls, pilings, buoys) such that it enhances the likelihood of dispersal?              | No             | No adaptations                                                                                                                                                                                                                               | Low       |
| 38                              | 7.04 | Is natural dispersal of the taxon likely to occur as eggs (for animals) or as propagules (for plants: seeds, spores) in the RA area?                                         | No             | No                                                                                                                                                                                                                                           | Low       |
| 39                              | 7.05 | Is natural dispersal of the taxon likely to occur as larvae/juveniles (for animals) or as fragments/seedlings (for plants) in the RA area?                                   | Yes            | Kottelat, M. and J. Freyhof, 2007. Handbook of European freshwater fishes. Publications Kottelat, Cornol and Freyhof, Berlin.                                                                                                                | Low       |
| 40                              | 7.06 | Are older life stages of the taxon likely to migrate in the RA area for reproduction?                                                                                        | Yes            | Kottelat, M. and J. Freyhof, 2007. Handbook of European freshwater fishes. Publications Kottelat, Cornol and Freyhof, Berlin.                                                                                                                | Low       |
| 41                              | 7.07 | Are propagules or eggs of the taxon likely to be dispersed in the RA area by other animals?                                                                                  | No             | No evidence                                                                                                                                                                                                                                  | Low       |
| 42                              | 7.08 | Is dispersal of the taxon along any of the vectors/pathways mentioned in the previous seven questions (35-41; i.e. both unintentional or intentional) likely to be           | Yes            | There is the possibility of a high rate of dispersal of taxa. E.g. when a fertilized individual enters a new area by some kind of dispersal.                                                                                                 | Medium    |
| 43                              | 7.09 | Is dispersal of the taxon density dependent?                                                                                                                                 | No             | No evidence                                                                                                                                                                                                                                  | Low       |
| <b>8. Tolerance attributes</b>  |      |                                                                                                                                                                              |                |                                                                                                                                                                                                                                              |           |
| 44                              | 8.01 | Is the taxon able to withstand being out of water for extended periods (e.g. minimum of one or more hours) at some stage of its life cycle?                                  | No             | No                                                                                                                                                                                                                                           | Low       |
| 45                              | 8.02 | Is the taxon tolerant of a wide range of water quality conditions relevant to that taxon? [In the Justification field, indicate the relevant water quality variable(s) being | No             | Sensitive species                                                                                                                                                                                                                            | Low       |
| 46                              | 8.03 | Can the taxon be controlled or eradicated in the wild with chemical, biological, or other agents/means?                                                                      | No             | No evidence                                                                                                                                                                                                                                  | Low       |
| 47                              | 8.04 | Is the taxon likely to tolerate or benefit from environmental/human disturbance?                                                                                             | No             | habitat destruction (Fishabse)                                                                                                                                                                                                               | Low       |
| 48                              | 8.05 | Is the taxon able to tolerate salinity levels that are higher or lower than those found in its usual environment?                                                            | No             | Freshwater fish                                                                                                                                                                                                                              | Low       |
| 49                              | 8.06 | Are there effective natural enemies (predators) of the taxon present in the RA                                                                                               | Yes            | Catfish, Zander, Pike..                                                                                                                                                                                                                      | High      |
| <b>C. Climate change</b>        |      |                                                                                                                                                                              |                |                                                                                                                                                                                                                                              |           |
| <b>9. Climate change</b>        |      |                                                                                                                                                                              |                |                                                                                                                                                                                                                                              |           |
| 50                              | 9.01 | Under the predicted future climatic conditions, are the risks of entry into the RA area posed by the taxon likely to increase, decrease or not change?                       | Not applicable | S. letnica is present in the RA area.                                                                                                                                                                                                        | Very high |
| 51                              | 9.02 | Under the predicted future climatic conditions, are the risks of establishment posed by the taxon likely to increase, decrease or not change?                                | Decrease       | Comte, L., Buisson, L., Daufresne, M., & Grenouillet, G. (2013). Climate-induced changes in the distribution of freshwater fish: observed and predicted trends. Freshwater Biology, 58(4), 625-639.                                          | Medium    |
| 52                              | 9.03 | Under the predicted future climatic conditions, are the risks of dispersal within the RA area posed by the taxon likely to increase, decrease or not change?                 | Decrease       | Comte, L., Buisson, L., Daufresne, M., & Grenouillet, G. (2013). Climate-induced changes in the distribution of freshwater fish: observed and predicted trends. Freshwater Biology, 58(4), 625-639.                                          | Medium    |

|    |      |                                                                                                                                                              |           |                                                                                                                                                                                                             |        |
|----|------|--------------------------------------------------------------------------------------------------------------------------------------------------------------|-----------|-------------------------------------------------------------------------------------------------------------------------------------------------------------------------------------------------------------|--------|
| 53 | 9.04 | Under the predicted future climatic conditions, what is the likely magnitude of future potential impacts on biodiversity and/or ecological integrity/status? | No change | Comte, L., Buisson, L., Daufresne, M., & Grenouillet, G. (2013). Climate-induced changes in the distribution of freshwater fish: observed and predicted trends. <i>Freshwater Biology</i> , 58(4), 625-639. | Medium |
| 54 | 9.05 | Under the predicted future climatic conditions, what is the likely magnitude of future potential impacts on ecosystem structure and/or function?             | No change | Comte, L., Buisson, L., Daufresne, M., & Grenouillet, G. (2013). Climate-induced changes in the distribution of freshwater fish: observed and predicted trends. <i>Freshwater Biology</i> , 58(4), 625-639. | Medium |
| 55 | 9.06 | Under the predicted future climatic conditions, what is the likely magnitude of future potential impacts on ecosystem services/socio-economic factors?       | No change | Comte, L., Buisson, L., Daufresne, M., & Grenouillet, G. (2013). Climate-induced changes in the distribution of freshwater fish: observed and predicted trends. <i>Freshwater Biology</i> , 58(4), 625-639. | Medium |

| Statistics                                     |             |
|------------------------------------------------|-------------|
| Scores                                         |             |
| <b>BRA</b>                                     | <b>16.5</b> |
| <b>BRA Outcome</b>                             | <b>-</b>    |
| <b>BRA+CCA</b>                                 | <b>12.5</b> |
| <b>BRA+CCA Outcome</b>                         | <b>-</b>    |
| Score partition                                |             |
| <b>A. Biogeography/Historical</b>              | <b>6.5</b>  |
| 1. Domestication/Cultivation                   | 4.0         |
| 2. Climate, distribution and introduction risk | 1.0         |
| 3. Invasive elsewhere                          | 1.5         |
| <b>B. Biology/Ecology</b>                      | <b>10.0</b> |
| 4. Undesirable (or persistence) traits         | 6.0         |
| 5. Resource exploitation                       | 5.0         |
| 6. Reproduction                                | 1.0         |
| 7. Dispersal mechanisms                        | 2.0         |
| 8. Tolerance attributes                        | -4.0        |
| <b>C. Climate change</b>                       | <b>-4.0</b> |
| 9. Climate change                              | -4.0        |
| Answered Questions                             |             |
| <b>Total</b>                                   | <b>55</b>   |
| <b>A. Biogeography/Historical</b>              | <b>13</b>   |
| 1. Domestication/Cultivation                   | 3           |
| 2. Climate, distribution and introduction risk | 5           |
| 3. Invasive elsewhere                          | 5           |
| <b>B. Biology/Ecology</b>                      | <b>36</b>   |
| 4. Undesirable (or persistence) traits         | 12          |
| 5. Resource exploitation                       | 2           |
| 6. Reproduction                                | 7           |
| 7. Dispersal mechanisms                        | 9           |
| 8. Tolerance attributes                        | 6           |
| <b>C. Climate change</b>                       | <b>6</b>    |
| 9. Climate change                              | 6           |
| Sectors affected                               |             |
| <b>Commercial</b>                              | <b>6</b>    |
| <b>Environmental</b>                           | <b>7</b>    |
| <b>Species or population nuisance traits</b>   | <b>4</b>    |

| Thresholds     |             |
|----------------|-------------|
| <b>BRA</b>     | <b>-</b>    |
| <b>BRA+CCA</b> | <b>-</b>    |
| Confidence     |             |
| <b>BRA+CCA</b> | <b>0.50</b> |
| <b>BRA</b>     | <b>0.49</b> |
| <b>CCA</b>     | <b>0.58</b> |

| Date and Time       |  |
|---------------------|--|
| 19/05/2021 12:29:45 |  |

## AS-ISK v2

| Taxon and Assessor details         |                                         |
|------------------------------------|-----------------------------------------|
| Category                           | Fishes and Lampreys (freshwater)        |
| Taxon name                         | <i>Salmo macedonicus</i>                |
| Common name                        | Macedonian trout                        |
| Assessor                           | Ana Marić                               |
| Risk screening context             |                                         |
| Reason and socio-economic benefits |                                         |
| Risk assessment area               | Danube & Adriatic basins BA, HR, ME, RS |
| Taxonomy                           |                                         |
| Native range                       |                                         |
| Introduced range                   |                                         |
| URL                                |                                         |

|                                                |      | Response                                                                                                                                                                | Justification (references and/or other information) | Confidence                                                                                                                                                                                                                                                                                                |           |
|------------------------------------------------|------|-------------------------------------------------------------------------------------------------------------------------------------------------------------------------|-----------------------------------------------------|-----------------------------------------------------------------------------------------------------------------------------------------------------------------------------------------------------------------------------------------------------------------------------------------------------------|-----------|
| A. Biogeography/Historical                     |      |                                                                                                                                                                         |                                                     |                                                                                                                                                                                                                                                                                                           |           |
| 1. Domestication/Cultivation                   |      |                                                                                                                                                                         |                                                     |                                                                                                                                                                                                                                                                                                           |           |
| 1                                              | 1.01 | Has the taxon been the subject of domestication (or cultivation) for at least 20 generations?                                                                           | Yes                                                 | Aleksandar SAVESKI, Tatjana KALEVSKA,Viktorija STAMATOVSKA, Dragan DAMJANOVSKI, 2017. CHEMICAL COMPOSITION AND ENERGY VALUE IN THE MEAT OF THE MACEDONIAN AND OHRID TROUT. Journal of Faculty of Food Engineering, Ștefan cel Mare University of Suceava, Romania Volume XVI, Issue 1- 2017, pag. 40 - 46 | Very high |
| 2                                              | 1.02 | Is the taxon harvested in the wild and likely to be sold or used in its live form?                                                                                      | Yes                                                 | http://www.fao.org/fishery/countrysector/naso_macedonia/en in FYRM http://extwprlegs1.fao.org/docs/pdf/srb153883.pdf u Srbiji moze preko 25cm                                                                                                                                                             | High      |
| 3                                              | 1.03 | Does the taxon have invasive races, varieties, sub-taxa or congeners?                                                                                                   | Yes                                                 | http://www.iucngisd.org/gisd/100_worst.php A handbook of global freshwater invasive speies. 2012. Robert A. Francis                                                                                                                                                                                       | Very high |
| 2. Climate, distribution and introduction risk |      |                                                                                                                                                                         |                                                     |                                                                                                                                                                                                                                                                                                           |           |
| 4                                              | 2.01 | How similar are the climatic conditions of the Risk Assessment (RA) area and the taxon's native range?                                                                  | High                                                | Dfb, Csb and Bsk in FYRM. Dfb is the same for all analysed countries.From 22 stations selected 11 are in same climate region (orange), five in red and 2,2,2, in light orange, yellow and light green. 16 matches are in FYRM near Kumanovo, 6 near Skopje and none near Strumica using Climatch.         | High      |
| 5                                              | 2.02 | What is the quality of the climate matching data?                                                                                                                       | Medium                                              | Data from Climatch were used                                                                                                                                                                                                                                                                              | High      |
| 6                                              | 2.03 | Is the taxon already present outside of captivity in the RA area?                                                                                                       | Yes                                                 | Predrag SIMONOVIĆ, Zoran VIDOVIĆ, Ana TOŠIĆ, Dubravka ŠKRABA, Jelena ČANAK-ATLAGIĆ, and Vera NIKOLIĆ. 2015. RISKS TO STOCKS OF NATIVE TROUT OF THE GENUS SALMO (ACTINOPTERYGII: SALMONIFORMES: SALMONIDAE) OF SERBIA AND ANAGEMENT FOR THEIR RECOVERY                                                     | High      |
| 7                                              | 2.04 | How many potential vectors could the taxon use to enter in the RA area?                                                                                                 | One                                                 | Intentional, unprofessional stocking                                                                                                                                                                                                                                                                      | High      |
| 8                                              | 2.05 | Is the taxon currently found in close proximity to, and likely to enter into, the RA area in the near future (e.g. unintentional and intentional introductions)?        | No                                                  | RISKS TO STOCKS OF NATIVE TROUT OF THE GENUS SALMO (ACTINOPTERYGII: SALMONIFORMES: SALMONIDAE) OF SERBIA AND MANAGEMENT FOR THEIR RECOVERY Predrag SIMONOVIĆ1*, Zoran VIDOVIĆ2, Ana TOŠIĆ1, Dubravka ŠKRABA1, Jelena ČANAK-ATLAGIĆ1, and Vera NIKOLIĆ 2015                                                | Low       |
| 3. Invasive elsewhere                          |      |                                                                                                                                                                         |                                                     |                                                                                                                                                                                                                                                                                                           |           |
| 9                                              | 3.01 | Has the taxon become naturalised (established viable populations) outside its native range?                                                                             | Yes                                                 | Predrag SIMONOVIĆ, Zoran VIDOVIĆ, Ana TOŠIĆ, Dubravka ŠKRABA, Jelena ČANAK-ATLAGIĆ, and Vera NIKOLIĆ. 2015. RISKS TO STOCKS OF NATIVE TROUT OF THE GENUS SALMO (ACTINOPTERYGII: SALMONIFORMES: SALMONIDAE) OF SERBIA AND MANAGEMENT FOR THEIR RECOVERY                                                    | Very high |
| 10                                             | 3.02 | In the taxon's introduced range, are there known adverse impacts to wild stocks or commercial taxa?                                                                     | No                                                  | RISKS TO STOCKS OF NATIVE TROUT OF THE GENUS SALMO (ACTINOPTERYGII: SALMONIFORMES: SALMONIDAE) OF SERBIA AND MANAGEMENT FOR THEIR RECOVERY Predrag SIMONOVIĆ1*, Zoran VIDOVIĆ2, Ana TOŠIĆ1, Dubravka ŠKRABA1, Jelena ČANAK-ATLAGIĆ1, and Vera NIKOLIĆ1                                                    | Medium    |
| 11                                             | 3.03 | In the taxon's introduced range, are there known adverse impacts to aquaculture?                                                                                        | No                                                  | RISKS TO STOCKS OF NATIVE TROUT OF THE GENUS SALMO (ACTINOPTERYGII: SALMONIFORMES: SALMONIDAE) OF SERBIA AND MANAGEMENT FOR THEIR RECOVERY Predrag SIMONOVIĆ1*, Zoran VIDOVIĆ2, Ana TOŠIĆ1, Dubravka ŠKRABA1, Jelena ČANAK-ATLAGIĆ1, and Vera NIKOLIĆ1 2015                                               | High      |
| 12                                             | 3.04 | In the taxon's introduced range, are there known adverse impacts to ecosystem services?                                                                                 | No                                                  | RISKS TO STOCKS OF NATIVE TROUT OF THE GENUS SALMO (ACTINOPTERYGII: SALMONIFORMES: SALMONIDAE) OF SERBIA AND MANAGEMENT FOR THEIR RECOVERY Predrag SIMONOVIĆ1*, Zoran VIDOVIĆ2, Ana TOŠIĆ1, Dubravka ŠKRABA1, Jelena ČANAK-ATLAGIĆ1, and Vera NIKOLIĆ1 2015                                               | High      |
| 13                                             | 3.05 | In the taxon's introduced range, are there known adverse socio-economic impacts?                                                                                        | No                                                  | RISKS TO STOCKS OF NATIVE TROUT OF THE GENUS SALMO (ACTINOPTERYGII: SALMONIFORMES: SALMONIDAE) OF SERBIA AND MANAGEMENT FOR THEIR RECOVERY Predrag SIMONOVIĆ1*, Zoran VIDOVIĆ2, Ana TOŠIĆ1, Dubravka ŠKRABA1, Jelena ČANAK-ATLAGIĆ1, and Vera NIKOLIĆ1                                                    | High      |
| B. Biology/Ecology                             |      |                                                                                                                                                                         |                                                     |                                                                                                                                                                                                                                                                                                           |           |
| 4. Undesirable (or persistence) traits         |      |                                                                                                                                                                         |                                                     |                                                                                                                                                                                                                                                                                                           |           |
| 14                                             | 4.01 | Is it likely that the taxon will be poisonous or pose other risks to human health?                                                                                      | No                                                  | Kottelat, M. and J. Freyhof, 2007. Handbook of European freshwater fishes. Publications Kottelat, Cornol and Freyhof,                                                                                                                                                                                     | Very high |
| 15                                             | 4.02 | Is it likely that the taxon will smother one or more native taxa (that are not threatened or protected)?                                                                | Yes                                                 | RISKS TO STOCKS OF NATIVE TROUT OF THE GENUS SALMO (ACTINOPTERYGII: SALMONIFORMES: SALMONIDAE) OF SERBIA AND MANAGEMENT FOR THEIR RECOVERY Predrag SIMONOVIĆ1*, Zoran VIDOVIĆ2, Ana TOŠIĆ1, Dubravka ŠKRABA1, Jelena ČANAK-ATLAGIĆ1, and Vera NIKOLIĆ1 2015                                               | High      |
| 16                                             | 4.03 | Are there any threatened or protected taxa that the non-native taxon would parasitise in the RA area?                                                                   | No                                                  | Not a parasite but it is a predator.                                                                                                                                                                                                                                                                      | High      |
| 17                                             | 4.04 | Is the taxon adaptable in terms of climatic and other environmental conditions, thus enhancing its potential persistence if it has invaded or could invade the RA area? | Yes                                                 | Since its relatives are very adaptable.                                                                                                                                                                                                                                                                   | Medium    |



|                                 |      |                                                                                                                                                                 |     |                                                                                                                                                                                                                                                                                                                                                                                                                                                                                                                                                                                                                                                                                                                                                       |           |
|---------------------------------|------|-----------------------------------------------------------------------------------------------------------------------------------------------------------------|-----|-------------------------------------------------------------------------------------------------------------------------------------------------------------------------------------------------------------------------------------------------------------------------------------------------------------------------------------------------------------------------------------------------------------------------------------------------------------------------------------------------------------------------------------------------------------------------------------------------------------------------------------------------------------------------------------------------------------------------------------------------------|-----------|
| 18                              | 4.05 | Is the taxon likely to disrupt food-web structure/function in aquatic ecosystems if it has invaded or is likely to invade the RA                                | Yes | Macedonian trout is top predator in native ecosystem.                                                                                                                                                                                                                                                                                                                                                                                                                                                                                                                                                                                                                                                                                                 | High      |
| 19                              | 4.06 | Is the taxon likely to exert adverse impacts on ecosystem services in the RA area?                                                                              | No  | RISKS TO STOCKS OF NATIVE TROUT OF THE GENUS SALMO (ACTINOPTERYGII: SALMONIFORMES: SALMONIDAE) OF SERBIA AND MANAGEMENT FOR THEIR RECOVERY Predrag SIMONOVII*1, Zoran VIDOVI*2, Ana TOŠI*1, Dubravka ŠKRABA1, Jelena ĆANAK-ATLAGI*1, and Vera NIKOLI*1 2015. Its relatives are.                                                                                                                                                                                                                                                                                                                                                                                                                                                                       | Medium    |
| 20                              | 4.07 | Is it likely that the taxon will host, and/or act as a vector for, recognised pests and infectious agents that are endemic in the RA                            | Yes | Is is similar to her relatives in RA area.                                                                                                                                                                                                                                                                                                                                                                                                                                                                                                                                                                                                                                                                                                            | High      |
| 21                              | 4.08 | Is it likely that the taxon will host, and/or act as a vector for, recognised pests and infectious agents that are absent from (novel to) the RA area?          | Yes | Probably.                                                                                                                                                                                                                                                                                                                                                                                                                                                                                                                                                                                                                                                                                                                                             | Medium    |
| 22                              | 4.09 | Is it likely that the taxon will achieve a body size that will make it more likely to be released from captivity?                                               | No  | Larger fish can easily escape from fish farms, but there are no fish farms of AdSalmo in Serbia. RISKS TO STOCKS OF NATIVE TROUT OF THE GENUS SALMO (ACTINOPTERYGII: SALMONIFORMES: SALMONIDAE) OF SERBIA AND MANAGEMENT FOR THEIR RECOVERY Predrag SIMONOVII*1, Zoran VIDOVI*2, Ana TOŠI*1, Dubravka ŠKRABA1, Jelena ĆANAK-ATLAGI*1, and Vera NIKOLI*1 2015                                                                                                                                                                                                                                                                                                                                                                                          | High      |
| 23                              | 4.10 | Is the taxon capable of sustaining itself in a range of water velocity conditions (e.g. versatile in habitat use)?                                              | Yes | Kottelat, M. and J. Freyhof, 2007. Handbook of European freshwater fishes. Publications Kottelat, Cornol and Freyhof, Berlin. 646 pp.                                                                                                                                                                                                                                                                                                                                                                                                                                                                                                                                                                                                                 | High      |
| 24                              | 4.11 | Is it likely that the taxon's mode of existence (e.g. excretion of by-products) or behaviours (e.g. feeding) will reduce habitat quality for native taxa?       | No  | Kottelat, M. and J. Freyhof, 2007. Handbook of European freshwater fishes. Publications Kottelat, Cornol and Freyhof, Berlin. 646 pp.                                                                                                                                                                                                                                                                                                                                                                                                                                                                                                                                                                                                                 | High      |
| 25                              | 4.12 | Is the taxon likely to maintain a viable population even when present in low densities (or persisting in adverse conditions by way of a dormant form)?          | No  | MANAGEMENT FOR THEIR RECOVERY Predrag SIMONOVII*1, Zoran VIDOVI*2, Ana TOŠI*1, Dubravka ŠKRABA1, Jelena ĆANAK-ATLAGI*1, and Vera NIKOLI*1 2015. Her relatives are.                                                                                                                                                                                                                                                                                                                                                                                                                                                                                                                                                                                    | Medium    |
| <b>5. Resource exploitation</b> |      |                                                                                                                                                                 |     |                                                                                                                                                                                                                                                                                                                                                                                                                                                                                                                                                                                                                                                                                                                                                       |           |
| 26                              | 5.01 | Is the taxon likely to consume threatened or protected native taxa in the RA area?                                                                              | Yes | Kottelat, M. and J. Freyhof, 2007. Handbook of European freshwater fishes. Publications Kottelat, Cornol and Freyhof, Berlin. 646 pp.                                                                                                                                                                                                                                                                                                                                                                                                                                                                                                                                                                                                                 | Very high |
| 27                              | 5.02 | Is the taxon likely to sequester food resources (including nutrients) to the detriment of native taxa in the RA area?                                           | No  | No data for RIP calculation. Kottelat, M. and J. Freyhof, 2007. Handbook of European freshwater fishes. Publications Kottelat, Cornol and Freyhof, Berlin. 646 pp.                                                                                                                                                                                                                                                                                                                                                                                                                                                                                                                                                                                    | Medium    |
| <b>6. Reproduction</b>          |      |                                                                                                                                                                 |     |                                                                                                                                                                                                                                                                                                                                                                                                                                                                                                                                                                                                                                                                                                                                                       |           |
| 28                              | 6.01 | Is the taxon likely to exhibit parental care and/or to reduce age-at-maturity in response to environmental conditions?                                          | Yes | <a href="https://onlinelibrary.wiley.com/doi/epdf/10.1111/j.1095-8649.2009.02380.x">https://onlinelibrary.wiley.com/doi/epdf/10.1111/j.1095-8649.2009.02380.x</a> za S. trutta i S. salar                                                                                                                                                                                                                                                                                                                                                                                                                                                                                                                                                             | High      |
| 29                              | 6.02 | Is the taxon likely to produce viable gametes or propagules (in the RA area)?                                                                                   | Yes | RISKS TO STOCKS OF NATIVE TROUT OF THE GENUS SALMO (ACTINOPTERYGII: SALMONIFORMES: SALMONIDAE) OF SERBIA AND MANAGEMENT FOR THEIR RECOVERY                                                                                                                                                                                                                                                                                                                                                                                                                                                                                                                                                                                                            | Very high |
| 30                              | 6.03 | Is the taxon likely to hybridise naturally with native taxa?                                                                                                    | Yes | RISKS TO STOCKS OF NATIVE TROUT OF THE GENUS SALMO (ACTINOPTERYGII: SALMONIFORMES: SALMONIDAE) OF SERBIA AND MANAGEMENT FOR THEIR RECOVERY                                                                                                                                                                                                                                                                                                                                                                                                                                                                                                                                                                                                            | High      |
| 31                              | 6.04 | Is the taxon likely to be hermaphroditic or to display asexual reproduction?                                                                                    | No  | Kottelat, M. and J. Freyhof, 2007. Handbook of European freshwater fishes. Publications Kottelat, Cornol and Freyhof, Berlin. 646 pp.                                                                                                                                                                                                                                                                                                                                                                                                                                                                                                                                                                                                                 | Medium    |
| 32                              | 6.05 | Is the taxon dependent on the presence of another taxon (or specific habitat features) to complete its life cycle?                                              | No  | Da li je ovde potrebna referenca? Kottelat, M. and J. Freyhof, 2007. Handbook of European freshwater fishes. Publications Kottelat, Cornol and Freyhof, Berlin. 646 pp.                                                                                                                                                                                                                                                                                                                                                                                                                                                                                                                                                                               | Very high |
| 33                              | 6.06 | Is the taxon known (or likely) to produce a large number of propagules or offspring within a short time span (e.g. < 1 year)?                                   | Yes | S obzirom na spoljašnje oplodjenje jeste. Nije precizirano koji je to broj jaja. Kottelat, M. and J. Freyhof, 2007. Handbook of European freshwater fishes. Publications Kottelat, Cornol and Freyhof, Berlin. 646 pp.                                                                                                                                                                                                                                                                                                                                                                                                                                                                                                                                | High      |
| 34                              | 6.07 | How many time units (days, months, years) does the taxon require to reach the age-at-first-reproduction?                                                        | 2   | <a href="https://www.researchgate.net/profile/J-Labee-Lund/publication/237183660_Variation_within_and_between_River_s_in_Adult_Size_and_Sea_Age_at_Maturity_of_Anadromous_Brown_Trout_Salmo_trutta/links/5677c0d308ae502c99d525e2/Variation-within-and-between-Rivers-in-Adult-Size-and-Sea-Age-at-Maturity-of-Anadromous-Brown-Trout-Salmo-trutta.pdf">https://www.researchgate.net/profile/J-Labee-Lund/publication/237183660_Variation_within_and_between_River_s_in_Adult_Size_and_Sea_Age_at_Maturity_of_Anadromous_Brown_Trout_Salmo_trutta/links/5677c0d308ae502c99d525e2/Variation-within-and-between-Rivers-in-Adult-Size-and-Sea-Age-at-Maturity-of-Anadromous-Brown-Trout-Salmo-trutta.pdf</a> 2-3 years kottelat and Freyhof za S. trutta | High      |
| <b>7. Dispersal mechanisms</b>  |      |                                                                                                                                                                 |     |                                                                                                                                                                                                                                                                                                                                                                                                                                                                                                                                                                                                                                                                                                                                                       |           |
| 35                              | 7.01 | How many potential internal vectors/pathways could the taxon use to disperse within the RA area (with suitable protected areas (e.g. MCZ, MPA, SSSI)?           | One | By unprofesional stocking?                                                                                                                                                                                                                                                                                                                                                                                                                                                                                                                                                                                                                                                                                                                            | Medium    |
| 36                              | 7.02 | Will any of these vectors/pathways bring the taxon in close proximity to one or more protected areas (e.g. MCZ, MPA, SSSI)?                                     | Yes | Probably SSSI.                                                                                                                                                                                                                                                                                                                                                                                                                                                                                                                                                                                                                                                                                                                                        | High      |
| 37                              | 7.03 | Does the taxon have a means of actively attaching itself to hard substrata (e.g. ship hulls, pilings, buoys) such that it enhances the likelihood of dispersal? | No  | No such structures.                                                                                                                                                                                                                                                                                                                                                                                                                                                                                                                                                                                                                                                                                                                                   | High      |
| 38                              | 7.04 | Is natural dispersal of the taxon likely to occur as eggs (for animals) or as propagules (for plants: seeds, spores) in the RA area?                            | No  | Kottelat, M. and J. Freyhof, 2007. Handbook of European freshwater fishes. Publications Kottelat, Cornol and Freyhof, Berlin. 646 pp.                                                                                                                                                                                                                                                                                                                                                                                                                                                                                                                                                                                                                 | High      |
| 39                              | 7.05 | Is natural dispersal of the taxon likely to occur as larvae/juveniles (for animals) or as fragments/seedlings (for plants) in the RA area?                      | Yes | Maybe, but in the associated streams.                                                                                                                                                                                                                                                                                                                                                                                                                                                                                                                                                                                                                                                                                                                 | High      |
| 40                              | 7.06 | Are older life stages of the taxon likely to migrate in the RA area for reproduction?                                                                           | Yes | S. trutta has migratory individuas and s. macedonicus perhapes                                                                                                                                                                                                                                                                                                                                                                                                                                                                                                                                                                                                                                                                                        | Medium    |
| 41                              | 7.07 | Are propagules or eggs of the taxon likely to be dispersed in the RA area by other animals?                                                                     | No  | Her eggs can only be eaten.                                                                                                                                                                                                                                                                                                                                                                                                                                                                                                                                                                                                                                                                                                                           | High      |

|                                |      |                                                                                                                                                                              |           |                                                                                                                                                                              |           |
|--------------------------------|------|------------------------------------------------------------------------------------------------------------------------------------------------------------------------------|-----------|------------------------------------------------------------------------------------------------------------------------------------------------------------------------------|-----------|
| 42                             | 7.08 | Is dispersal of the taxon along any of the vectors/pathways mentioned in the previous seven questions (35-41; i.e. both unintentional or intentional) likely to be           | Yes       | If dispersed by human is likely to be rapid                                                                                                                                  | High      |
| 43                             | 7.09 | Is dispersal of the taxon density dependent?                                                                                                                                 | Yes       | Probably, partial migratory behaviour in brown trout is density dependent.                                                                                                   | Medium    |
| <b>8. Tolerance attributes</b> |      |                                                                                                                                                                              |           |                                                                                                                                                                              |           |
| 44                             | 8.01 | Is the taxon able to withstand being out of water for extended periods (e.g. minimum of one or more hours) at some stage of its life cycle?                                  | No        | Brown trout won't survive these conditions.                                                                                                                                  | High      |
| 45                             | 8.02 | Is the taxon tolerant of a wide range of water quality conditions relevant to that taxon? [In the Justification field, indicate the relevant water quality variable(s) being | No        | Trout prefers cold, fast and oxygenated water, but we have seen it in different streams, as well                                                                             | Medium    |
| 46                             | 8.03 | Can the taxon be controlled or eradicated in the wild with chemical, biological, or other agents/means?                                                                      | No        | It is very difficult with fish species.                                                                                                                                      | High      |
| 47                             | 8.04 | Is the taxon likely to tolerate or benefit from environmental/human disturbance?                                                                                             | No        | Probably floods can spread some individuals. Check                                                                                                                           | Medium    |
| 48                             | 8.05 | Is the taxon able to tolerate salinity levels that are higher or lower than those found in its usual environment?                                                            | Yes       | Some populations of <i>S. trutta</i> are partly migratory, probably it stands for <i>macedonicus</i> as well.                                                                | Medium    |
| 49                             | 8.06 | Are there effective natural enemies (predators) of the taxon present in the RA area?                                                                                         | Yes       | Other fish species can eat trout eggs. Kottelat, M. and J. Freyhof, 2007. Handbook of European freshwater fishes. Publications Kottelat, Cornol and Freyhof, Berlin. 646 pp. | Very high |
| <b>C. Climate change</b>       |      |                                                                                                                                                                              |           |                                                                                                                                                                              |           |
| <b>9. Climate change</b>       |      |                                                                                                                                                                              |           |                                                                                                                                                                              |           |
| 50                             | 9.01 | Under the predicted future climatic conditions, are the risks of entry into the RA area posed by the taxon likely to increase, decrease or not change?                       | No change | Probably since macedonian trout prefers a little warmer climate.                                                                                                             | Medium    |
| 51                             | 9.02 | Under the predicted future climatic conditions, are the risks of establishment posed by the taxon likely to increase, decrease or not change?                                | Increase  | She is established already, a little more similar climate can only increase establishment                                                                                    | Medium    |
| 52                             | 9.03 | Under the predicted future climatic conditions, are the risks of dispersal within the RA area posed by the taxon likely to increase, decrease or not change?                 | No change | Dispersal would be the same - human influenced.                                                                                                                              | Medium    |
| 53                             | 9.04 | Under the predicted future climatic conditions, what is the likely magnitude of future potential impacts on biodiversity and/or ecological integrity/status?                 | Higher    | If she establish population as a top predator it could impact biodiversity more.                                                                                             | Medium    |
| 54                             | 9.05 | Under the predicted future climatic conditions, what is the likely magnitude of future potential impacts on ecosystem structure and/or function?                             | Higher    | Same as for the previous question.                                                                                                                                           | Medium    |
| 55                             | 9.06 | Under the predicted future climatic conditions, what is the likely magnitude of future potential impacts on ecosystem services/socio-economic factors?                       | Higher    | It could impact fisheries                                                                                                                                                    | Medium    |

| Statistics                                     |             |
|------------------------------------------------|-------------|
| Scores                                         |             |
| <b>BRA</b>                                     | <b>23.0</b> |
| <b>BRA Outcome</b>                             | <b>-</b>    |
| <b>BRA+CCA</b>                                 | <b>31.0</b> |
| <b>BRA+CCA Outcome</b>                         | <b>-</b>    |
| Score partition                                |             |
| <b>A. Biogeography/Historical</b>              | <b>7.0</b>  |
| 1. Domestication/Cultivation                   | 4.0         |
| 2. Climate, distribution and introduction risk | 1.0         |
| 3. Invasive elsewhere                          | 2.0         |
| <b>B. Biology/Ecology</b>                      | <b>16.0</b> |
| 4. Undesirable (or persistence) traits         | 6.0         |
| 5. Resource exploitation                       | 5.0         |
| 6. Reproduction                                | 4.0         |
| 7. Dispersal mechanisms                        | 2.0         |
| 8. Tolerance attributes                        | -1.0        |
| <b>C. Climate change</b>                       | <b>8.0</b>  |
| 9. Climate change                              | 8.0         |
| Answered Questions                             |             |
| <b>Total</b>                                   | <b>55</b>   |
| <b>A. Biogeography/Historical</b>              | <b>13</b>   |
| 1. Domestication/Cultivation                   | 3           |
| 2. Climate, distribution and introduction risk | 5           |
| 3. Invasive elsewhere                          | 5           |
| <b>B. Biology/Ecology</b>                      | <b>36</b>   |
| 4. Undesirable (or persistence) traits         | 12          |
| 5. Resource exploitation                       | 2           |
| 6. Reproduction                                | 7           |
| 7. Dispersal mechanisms                        | 9           |
| 8. Tolerance attributes                        | 6           |
| <b>C. Climate change</b>                       | <b>6</b>    |
| 9. Climate change                              | 6           |
| Sectors affected                               |             |
| <b>Commercial</b>                              | <b>7</b>    |
| <b>Environmental</b>                           | <b>11</b>   |
| <b>Species or population nuisance traits</b>   | <b>16</b>   |

| Thresholds |         |      |
|------------|---------|------|
|            | BRA     | -    |
|            | BRA+CCA | -    |
| Confidence |         |      |
|            | BRA+CCA | 0.69 |
|            | BRA     | 0.71 |
|            | CCA     | 0.50 |

| Date and Time       |  |
|---------------------|--|
| 16/05/2021 21:45:56 |  |

## AS-ISK v2

| Taxon and Assessor details         |                                         |
|------------------------------------|-----------------------------------------|
| Category                           | Fishes and Lampreys (freshwater)        |
| Taxon name                         | <i>Salmo macedonicus</i>                |
| Common name                        | Macedonian trout                        |
| Assessor                           | Ivan Špelić                             |
| Risk screening context             |                                         |
| Reason and socio-economic benefits |                                         |
| Risk assessment area               | Danube & Adriatic basins BA, HR, ME, RS |
| Taxonomy                           |                                         |
| Native range                       |                                         |
| Introduced range                   |                                         |
| URL                                |                                         |

|                                                |      | Response                                                                                                                                                         | Justification (references and/or other information) | Confidence                                                                                                                                                                                                                                                                                                                                                                                                                                                                                                                                                                                        |           |
|------------------------------------------------|------|------------------------------------------------------------------------------------------------------------------------------------------------------------------|-----------------------------------------------------|---------------------------------------------------------------------------------------------------------------------------------------------------------------------------------------------------------------------------------------------------------------------------------------------------------------------------------------------------------------------------------------------------------------------------------------------------------------------------------------------------------------------------------------------------------------------------------------------------|-----------|
| A. Biogeography/Historical                     |      |                                                                                                                                                                  |                                                     |                                                                                                                                                                                                                                                                                                                                                                                                                                                                                                                                                                                                   |           |
| 1. Domestication/Cultivation                   |      |                                                                                                                                                                  |                                                     |                                                                                                                                                                                                                                                                                                                                                                                                                                                                                                                                                                                                   |           |
| 1                                              | 1.01 | Has the taxon been the subject of domestication (or cultivation) for at least 20 generations?                                                                    | Yes                                                 | <a href="https://sgp.undp.org/spacial-itemid-projects-landing-page/spacial-itemid-project-search-results/spacial-itemid-project-detailpage.html?view=projectdetail&amp;id=15129">https://sgp.undp.org/spacial-itemid-projects-landing-page/spacial-itemid-project-search-results/spacial-itemid-project-detailpage.html?view=projectdetail&amp;id=15129</a>                                                                                                                                                                                                                                       | Medium    |
| 2                                              | 1.02 | Is the taxon harvested in the wild and likely to be sold or used in its live form?                                                                               | Yes                                                 | For restocking purposes, as brood stock ( <a href="https://sgp.undp.org/spacial-itemid-projects-landing-page/spacial-itemid-project-search-results/spacial-itemid-project-detailpage.html?view=projectdetail&amp;id=15129">https://sgp.undp.org/spacial-itemid-projects-landing-page/spacial-itemid-project-search-results/spacial-itemid-project-detailpage.html?view=projectdetail&amp;id=15129</a> ).                                                                                                                                                                                          | Medium    |
| 3                                              | 1.03 | Does the taxon have invasive races, varieties, sub-taxa or congeners?                                                                                            | Yes                                                 | Salmo trutta (CABI).                                                                                                                                                                                                                                                                                                                                                                                                                                                                                                                                                                              | Very high |
| 2. Climate, distribution and introduction risk |      |                                                                                                                                                                  |                                                     |                                                                                                                                                                                                                                                                                                                                                                                                                                                                                                                                                                                                   |           |
| 4                                              | 2.01 | How similar are the climatic conditions of the Risk Assessment (RA) area and the taxon's native range?                                                           | High                                                | Climatch, low number of source points (only three).                                                                                                                                                                                                                                                                                                                                                                                                                                                                                                                                               | Low       |
| 5                                              | 2.02 | What is the quality of the climate matching data?                                                                                                                | Low                                                 | Climatch, low number of source points (only three).                                                                                                                                                                                                                                                                                                                                                                                                                                                                                                                                               | Very high |
| 6                                              | 2.03 | Is the taxon already present outside of captivity in the RA area?                                                                                                | Yes                                                 | River Jerma in Serbia (Danube basin) (Simonović, P., 2015. Risks to stocks of native trout of the genus Salmo (Actinopterygii: Salmoniformes: Salmonidae) of Serbia and management for their recovery. Acta Ichthyologica et Piscatoria 45, 161–173.. doi:10.3750/aip2015.45.2.06).                                                                                                                                                                                                                                                                                                               | Very high |
| 7                                              | 2.04 | How many potential vectors could the taxon use to enter in the RA area?                                                                                          | Not applicable                                      | Already present (Škraba Jurlina, D., Marić, A., Mrdak, D., Kanjuh, T., Špelić, I., Nikolić, V., Piria, M., Simonović, P., 2020. Alternative Life-History in Native Trout (Salmo spp.) Suppresses the Invasive Effect of Alien Trout Strains Introduced Into Streams in the Western Part of the Balkans. Frontiers in Ecology and Evolution 8.. doi:10.3389/fevo.2020.00188; Simonović, P., 2015. Risks to stocks of native trout of the genus Salmo (Actinopterygii: Salmoniformes: Salmonidae) of Serbia and management for their recovery. Acta Ichthyologica et Piscatoria 45, 161–173..       | Very high |
| 8                                              | 2.05 | Is the taxon currently found in close proximity to, and likely to enter into, the RA area in the near future (e.g. unintentional and intentional introductions)? | Not applicable                                      | Already present (Škraba Jurlina, D., Marić, A., Mrdak, D., Kanjuh, T., Špelić, I., Nikolić, V., Piria, M., Simonović, P., 2020. Alternative Life-History in Native Trout (Salmo spp.) Suppresses the Invasive Effect of Alien Trout Strains Introduced Into Streams in the Western Part of the Balkans. Frontiers in Ecology and Evolution 8.. doi:10.3389/fevo.2020.00188; Simonović, P., 2015. Risks to stocks of native trout of the genus Salmo (Actinopterygii: Salmoniformes: Salmonidae) of Serbia and management for their recovery. Acta Ichthyologica et Piscatoria 45, 161–173..       | Very high |
| 3. Invasive elsewhere                          |      |                                                                                                                                                                  |                                                     |                                                                                                                                                                                                                                                                                                                                                                                                                                                                                                                                                                                                   |           |
| 9                                              | 3.01 | Has the taxon become naturalised (established viable populations) outside its native range?                                                                      | Yes                                                 | Jerma river in Serbia (Škraba Jurlina, D., Marić, A., Mrdak, D., Kanjuh, T., Špelić, I., Nikolić, V., Piria, M., Simonović, P., 2020. Alternative Life-History in Native Trout (Salmo spp.) Suppresses the Invasive Effect of Alien Trout Strains Introduced Into Streams in the Western Part of the Balkans. Frontiers in Ecology and Evolution 8.. doi:10.3389/fevo.2020.00188; Simonović, P., 2015. Risks to stocks of native trout of the genus Salmo (Actinopterygii: Salmoniformes: Salmonidae) of Serbia and management for their recovery. Acta Ichthyologica et Piscatoria 45, 161–173.. | Medium    |
| 10                                             | 3.02 | In the taxon's introduced range, are there known adverse impacts to wild stocks or commercial taxa?                                                              | Yes                                                 | Hybridization with native species (Škraba Jurlina, D., Marić, A., Mrdak, D., Kanjuh, T., Špelić, I., Nikolić, V., Piria, M., Simonović, P., 2020. Alternative Life-History in Native Trout (Salmo spp.) Suppresses the Invasive Effect of Alien Trout Strains Introduced Into Streams in the Western Part of the Balkans. Frontiers in Ecology and Evolution 8.. doi:10.3389/fevo.2020.00188).                                                                                                                                                                                                    | High      |
| 11                                             | 3.03 | In the taxon's introduced range, are there known adverse impacts to aquaculture?                                                                                 | No                                                  | No documented evidence.                                                                                                                                                                                                                                                                                                                                                                                                                                                                                                                                                                           | High      |
| 12                                             | 3.04 | In the taxon's introduced range, are there known adverse impacts to ecosystem                                                                                    | No                                                  | No documented impacts.                                                                                                                                                                                                                                                                                                                                                                                                                                                                                                                                                                            | High      |
| 13                                             | 3.05 | In the taxon's introduced range, are there known adverse socio-economic impacts?                                                                                 | No                                                  | No documented impacts.                                                                                                                                                                                                                                                                                                                                                                                                                                                                                                                                                                            | High      |
| B. Biology/Ecology                             |      |                                                                                                                                                                  |                                                     |                                                                                                                                                                                                                                                                                                                                                                                                                                                                                                                                                                                                   |           |
| 4. Undesirable (or persistence) traits         |      |                                                                                                                                                                  |                                                     |                                                                                                                                                                                                                                                                                                                                                                                                                                                                                                                                                                                                   |           |
| 14                                             | 4.01 | Is it likely that the taxon will be poisonous or pose other risks to human health?                                                                               | No                                                  | Harmless (Torres, Armi G. in Froese, R. and D. Pauly. Editors. 2021.FishBase. World Wide Web electronic publication. <a href="http://www.fishbase.org">www.fishbase.org</a> , ( 02/2021 )).                                                                                                                                                                                                                                                                                                                                                                                                       | Very high |

|                                 |      |                                                                                                                                                                         |                |                                                                                                                                                                                                                                                                                                                                                                                                                                                                                                                                                                                                                                                                                                                                                                                                                                                                                                                                                                                          |           |
|---------------------------------|------|-------------------------------------------------------------------------------------------------------------------------------------------------------------------------|----------------|------------------------------------------------------------------------------------------------------------------------------------------------------------------------------------------------------------------------------------------------------------------------------------------------------------------------------------------------------------------------------------------------------------------------------------------------------------------------------------------------------------------------------------------------------------------------------------------------------------------------------------------------------------------------------------------------------------------------------------------------------------------------------------------------------------------------------------------------------------------------------------------------------------------------------------------------------------------------------------------|-----------|
| 15                              | 4.02 | Is it likely that the taxon will smother one or more native taxa (that are not threatened or protected)?                                                                | Yes            | Biology and ecology are presumably similar to other invasive <i>Salmo trutta</i> lineages (belonging to the same brown trout complex). <i>Salmo trutta</i> has been implicated in reducing native fish populations (especially other salmonids) through predation, displacement, and food competition; <i>S. trutta</i> introductions may have eliminated or reduced several Plecoptera and Trichoptera species in streams in Victoria, Australia (CABI, 2021. <i>Salmo trutta</i> [original text by Sunil Siriwardena]. In: Invasive Species Compendium. Wallingford, UK: CAB International.                                                                                                                                                                                                                                                                                                                                                                                            | Medium    |
| 16                              | 4.03 | Are there any threatened or protected taxa that the non-native taxon would parasitise in the RA area?                                                                   | No             | No parasitic behavior within genus.                                                                                                                                                                                                                                                                                                                                                                                                                                                                                                                                                                                                                                                                                                                                                                                                                                                                                                                                                      | Very high |
| 17                              | 4.04 | Is the taxon adaptable in terms of climatic and other environmental conditions, thus enhancing its potential persistence if it has invaded or could invade the RA area? | No             | For <i>Salmo trutta</i> from the same species complex: they prefer cold, well-oxygenated upland waters although their tolerance limits are lower than those of rainbow trout and favors large streams in the mountainous areas with adequate cover in the form of submerged rocks, undercut banks, and overhanging vegetation (Froese, R. and D. Pauly. Editors. 2019.FishBase. World Wide Web electronic publication. www.fishbase.org, ( 12/2019 ). <i>Salmo macedonicus</i> is present only in upper Vardar drainage in Macedonia and in Jerma river in Serbia where it was introduced (Torres, Armi G. in Froese, R. and D. Pauly. Editors. 2021.FishBase. World Wide Web electronic publication. www.fishbase.org, ( 02/2021 ); Simonović, P., 2015. Risks to stocks of native trout of the genus <i>Salmo</i> (Actinopterygii: Salmoniformes: Salmonidae) of Serbia and management for their recovery. Acta Ichthyologica et Piscatoria 45, 161–173. doi:10.3750/ain2015.45.2.06). | High      |
| 18                              | 4.05 | Is the taxon likely to disrupt food-web structure/function in aquatic ecosystems if it has invaded or is likely to invade the RA area?                                  | Yes            | Nystrom, P.; McIntosh, A. R. (2003): Are impacts of an exotic predator on a stream food web influenced by disturbance history? Oecologia (2003) 136:279–288. DOI 10.1007/s00442-003-1250-3 (for <i>Salmo trutta</i> in the same species complex).                                                                                                                                                                                                                                                                                                                                                                                                                                                                                                                                                                                                                                                                                                                                        | Medium    |
| 19                              | 4.06 | Is the taxon likely to exert adverse impacts on ecosystem services in the RA area?                                                                                      | Yes            | For <i>Salmo trutta</i> from the same species complex: brown trout have been implicated in reducing native fish populations (especially other salmonids), which could be more attractive for fishing, through predation, displacement, food competition and hybridization (Global Invasive Species Database (2020) Species profile: <i>Salmo trutta</i> . Downloaded from <a href="http://www.iucngisd.org/gisd/speciesname/Salmo+trutta">http://www.iucngisd.org/gisd/speciesname/Salmo+trutta</a> on 25-02-2020).                                                                                                                                                                                                                                                                                                                                                                                                                                                                      | Medium    |
| 20                              | 4.07 | Is it likely that the taxon will host, and/or act as a vector for, recognised pests and infectious agents that are endemic in the RA area?                              | Yes            | <i>Salmo trutta</i> is susceptible to pathogens and parasites (Cultured Aquatic Species Information Programme. <i>Salmo trutta</i> . Cultured Aquatic Species Information Programme. Text by Vandeputte, M. & Labbé, L. In: FAO Fisheries Division [online]. Rome. Updated . [Cited 24 May 2021].), so most likely <i>S. macedonicus</i> is also susceptible as a part of the brown trout complex.                                                                                                                                                                                                                                                                                                                                                                                                                                                                                                                                                                                       | Medium    |
| 21                              | 4.08 | Is it likely that the taxon will host, and/or act as a vector for, recognised pests and infectious agents that are absent from (novel to) the RA area?                  | Yes            | <i>Salmo trutta</i> is susceptible to pathogens and parasites (Cultured Aquatic Species Information Programme. <i>Salmo trutta</i> . Cultured Aquatic Species Information Programme. Text by Vandeputte, M. & Labbé, L. In: FAO Fisheries Division [online]. Rome. Updated . [Cited 24 May 2021].), so most likely <i>S. macedonicus</i> is also susceptible as a part of the brown trout complex.                                                                                                                                                                                                                                                                                                                                                                                                                                                                                                                                                                                       | Medium    |
| 22                              | 4.09 | Is it likely that the taxon will achieve a body size that will make it more likely to be released from captivity?                                                       | Yes            | Size to 40 cm (Torres, Armi G. in Froese, R. and D. Pauly. Editors. 2021.FishBase. World Wide Web electronic publication. www.fishbase.org, ( 02/2021 )).                                                                                                                                                                                                                                                                                                                                                                                                                                                                                                                                                                                                                                                                                                                                                                                                                                | Very high |
| 23                              | 4.10 | Is the taxon capable of sustaining itself in a range of water velocity conditions (e.g. versatile in habitat use)?                                                      | No             | Inhabits stretches with swift water, rapids and small waterfalls (Torres, Armi G. in Froese, R. and D. Pauly. Editors. 2021.FishBase. World Wide Web electronic publication. www.fishbase.org, ( 02/2021 )).                                                                                                                                                                                                                                                                                                                                                                                                                                                                                                                                                                                                                                                                                                                                                                             | Medium    |
| 24                              | 4.11 | Is it likely that the taxon's mode of existence (e.g. excretion of by-products) or behaviours (e.g. feeding) will reduce habitat quality for native taxa?               | No             | Lives in habitats usually associated with hard substrate, ecology does not imply such impacts (Torres, Armi G. in Froese, R. and D. Pauly. Editors. 2021.FishBase. World Wide Web electronic publication. www.fishbase.org, ( 02/2021 )) and it was never                                                                                                                                                                                                                                                                                                                                                                                                                                                                                                                                                                                                                                                                                                                                | High      |
| 25                              | 4.12 | Is the taxon likely to maintain a viable population even when present in low densities (or persisting in adverse conditions by way of a dormant form)?                  | No             | Not documented.                                                                                                                                                                                                                                                                                                                                                                                                                                                                                                                                                                                                                                                                                                                                                                                                                                                                                                                                                                          | Low       |
| <b>5. Resource exploitation</b> |      |                                                                                                                                                                         |                |                                                                                                                                                                                                                                                                                                                                                                                                                                                                                                                                                                                                                                                                                                                                                                                                                                                                                                                                                                                          |           |
| 26                              | 5.01 | Is the taxon likely to consume threatened or protected native taxa in the RA area?                                                                                      | Yes            | No information on diet. As a part of the brown trout complex, smaller specimens most likely feed on invertebrates and larger                                                                                                                                                                                                                                                                                                                                                                                                                                                                                                                                                                                                                                                                                                                                                                                                                                                             | Low       |
| 27                              | 5.02 | Is the taxon likely to sequester food resources (including nutrients) to the detriment of native taxa in the RA area?                                                   | Not applicable | No data for calculation.                                                                                                                                                                                                                                                                                                                                                                                                                                                                                                                                                                                                                                                                                                                                                                                                                                                                                                                                                                 | Very high |
| <b>6. Reproduction</b>          |      |                                                                                                                                                                         |                |                                                                                                                                                                                                                                                                                                                                                                                                                                                                                                                                                                                                                                                                                                                                                                                                                                                                                                                                                                                          |           |
| 28                              | 6.01 | Is the taxon likely to exhibit parental care and/or to reduce age-at-maturity in response to environmental conditions?                                                  | No             | No such observations within <i>Salmo trutta</i> complex.                                                                                                                                                                                                                                                                                                                                                                                                                                                                                                                                                                                                                                                                                                                                                                                                                                                                                                                                 | High      |
| 29                              | 6.02 | Is the taxon likely to produce viable gametes or propagules (in the RA area)?                                                                                           | Yes            | Established in river Jerma in Serbia (Simonović, P., 2015. Risks to stocks of native trout of the genus <i>Salmo</i> (Actinopterygii: Salmoniformes: Salmonidae) of Serbia and management for their recovery. Acta Ichthyologica et Piscatoria 45, 161–173.. doi:10.3750/aip2015.45.2.06; Škraba Jurlina, D., Marić, A., Mrdak, D., Kanjuh, T., Špelić, I., Nikolić, V., Piria, M., Simonović, P., 2020. Alternative Life-History in Native Trout ( <i>Salmo</i> spp.) Suppresses the Invasive Effect of Alien Trout Strains Introduced Into Streams in the Western Part of the Balkans. Frontiers in Ecology and Evolution 8. doi:10.3389/fevo.2020.00188).                                                                                                                                                                                                                                                                                                                             | Very high |

|                                |      |                                                                                                                                                                              |     |                                                                                                                                                                                                                                                                                                                                                                                                                                                                                                                                                                                                       |           |
|--------------------------------|------|------------------------------------------------------------------------------------------------------------------------------------------------------------------------------|-----|-------------------------------------------------------------------------------------------------------------------------------------------------------------------------------------------------------------------------------------------------------------------------------------------------------------------------------------------------------------------------------------------------------------------------------------------------------------------------------------------------------------------------------------------------------------------------------------------------------|-----------|
| 30                             | 6.03 | Is the taxon likely to hybridise naturally with native taxa?                                                                                                                 | Yes | Simonović, P., 2015. Risks to stocks of native trout of the genus <i>Salmo</i> (Actinopterygii: Salmoniformes: Salmonidae) of Serbia and management for their recovery. <i>Acta Ichthyologica et Piscatoria</i> 45, 161–173. doi:10.3750/aip2015.45.2.06; Škraba Jurlina, D., Marić, A., Mrdak, D., Kanjuh, T., Špelić, I., Nikolić, V., Piria, M., Simonović, P., 2020. Alternative Life-History in Native Trout ( <i>Salmo</i> spp.) Suppresses the Invasive Effect of Alien Trout Strains Introduced Into Streams in the Western Part of the Balkans. <i>Frontiers in Ecology and Evolution</i> 8. | Very high |
| 31                             | 6.04 | Is the taxon likely to be hermaphroditic or to display asexual reproduction?                                                                                                 | No  | No such observations within <i>Salmo trutta</i> complex.                                                                                                                                                                                                                                                                                                                                                                                                                                                                                                                                              | High      |
| 32                             | 6.05 | Is the taxon dependent on the presence of another taxon (or specific habitat features) to complete its life cycle?                                                           | Yes | No information for this species, most likely similar to <i>S. trutta</i> from the same complex: Spawns in rivers and streams with swift current, usually characterized by downward movement of water into gravel (Froese & Pauly 2019).                                                                                                                                                                                                                                                                                                                                                               | Low       |
| 33                             | 6.06 | Is the taxon known (or likely) to produce a large number of propagules or offspring within a short time span (e.g. < 1 year)?                                                | Yes | Similar to other taxons of the brown trout complex.                                                                                                                                                                                                                                                                                                                                                                                                                                                                                                                                                   | Medium    |
| 34                             | 6.07 | How many time units (days, months, years) does the taxon require to reach the age-at-first-reproduction?                                                                     | 1   | No information, other taxons in brown trout complex are usually mature in 1-2 years.                                                                                                                                                                                                                                                                                                                                                                                                                                                                                                                  | Low       |
| <b>7. Dispersal mechanisms</b> |      |                                                                                                                                                                              |     |                                                                                                                                                                                                                                                                                                                                                                                                                                                                                                                                                                                                       |           |
| 35                             | 7.01 | How many potential internal vectors/pathways could the taxon use to disperse within the RA area (with suitable habitats nearby)?                                             | One | Introduction for angling (stocking) (Kanjuh T., S. Tomić, A. Marić, D. Š. Jurlina, V. Nikolić & P. Simonović 2021. Trout <i>Salmo</i> spp. (Salmoniformes: Salmonidae) Molecular Diversity in Streams on the Southern Slopes of the Stara Planina Mts. in Serbia. <i>Acta Zool. Bulg.</i> , in press ).                                                                                                                                                                                                                                                                                               | Medium    |
| 36                             | 7.02 | Will any of these vectors/pathways bring the taxon in close proximity to one or more protected areas (e.g. MCZ, MPA, SSSI)?                                                  | No  | For years present just in one river in Serbia with occasional occurrences in rivers downstream (Kanjuh T., S. Tomić, A. Marić, D. Š. Jurlina, V. Nikolić & P. Simonović 2021. Trout <i>Salmo</i> spp. (Salmoniformes: Salmonidae) Molecular Diversity in Streams on the Southern Slopes of the Stara Planina Mts. in Serbia. <i>Acta Zool. Bulg.</i> , in press ).                                                                                                                                                                                                                                    | Low       |
| 37                             | 7.03 | Does the taxon have a means of actively attaching itself to hard substrata (e.g. ship hulls, pilings, buoys) such that it enhances the likelihood of dispersal?              | No  | No adaptations.                                                                                                                                                                                                                                                                                                                                                                                                                                                                                                                                                                                       | Very high |
| 38                             | 7.04 | Is natural dispersal of the taxon likely to occur as eggs (for animals) or as propagules (for plants: seeds, spores) in the RA area?                                         | No  | Not documented, other taxons in the brown trout complex deposit eggs in redds between gravel.                                                                                                                                                                                                                                                                                                                                                                                                                                                                                                         | Low       |
| 39                             | 7.05 | Is natural dispersal of the taxon likely to occur as larvae/juveniles (for animals) or as fragments/seedlings (for plants) in the RA area?                                   | Yes | Present in Jerma, spreading in the River Nišava downstream and entering into large tributaries such as the River Temštica (personal observations), with the occasional reports of catches even in the city of Niš, more than 100 km downstream (Kanjuh T., S. Tomić, A. Marić, D. Š. Jurlina, V. Nikolić & P. Simonović 2021. Trout <i>Salmo</i> spp. (Salmoniformes: Salmonidae) Molecular Diversity in Streams on the Southern Slopes of the Stara Planina Mts. in Serbia. <i>Acta Zool. Bulg.</i> , in press ). Not certain if it is the                                                           | Low       |
| 40                             | 7.06 | Are older life stages of the taxon likely to migrate in the RA area for reproduction?                                                                                        | No  | No evidence, resident life history (Kottelat & Freyhof 2008).                                                                                                                                                                                                                                                                                                                                                                                                                                                                                                                                         | Medium    |
| 41                             | 7.07 | Are propagules or eggs of the taxon likely to be dispersed in the RA area by other animals?                                                                                  | No  | Not documented, other taxons in the brown trout complex deposit eggs in redds between gravel.                                                                                                                                                                                                                                                                                                                                                                                                                                                                                                         | Low       |
| 42                             | 7.08 | Is dispersal of the taxon along any of the vectors/pathways mentioned in the previous seven questions (35–41; i.e. both unintentional or intentional) likely to be           | Yes | Stocking, natural dispersal.                                                                                                                                                                                                                                                                                                                                                                                                                                                                                                                                                                          | High      |
| 43                             | 7.09 | Is dispersal of the taxon density dependent?                                                                                                                                 | Yes | Present in Jerma, spreading in the River Nišava downstream and entering into large tributaries such as the River Temštica (personal observations), with the occasional reports of catches even in the city of Niš, more than 100 km downstream (Kanjuh T., S. Tomić, A. Marić, D. Š. Jurlina, V. Nikolić & P. Simonović 2021. Trout <i>Salmo</i> spp. (Salmoniformes: Salmonidae) Molecular Diversity in Streams on the Southern Slopes of the Stara Planina Mts. in Serbia. <i>Acta Zool. Bulg.</i> , in press ). Not certain if it is the result of density dependent dispersion.                   | Low       |
| <b>8. Tolerance attributes</b> |      |                                                                                                                                                                              |     |                                                                                                                                                                                                                                                                                                                                                                                                                                                                                                                                                                                                       |           |
| 44                             | 8.01 | Is the taxon able to withstand being out of water for extended periods (e.g. minimum of one or more hours) at some stage of its life cycle?                                  | No  | Sensitive species, most likely similar to other taxons in brown trout complex.                                                                                                                                                                                                                                                                                                                                                                                                                                                                                                                        | High      |
| 45                             | 8.02 | Is the taxon tolerant of a wide range of water quality conditions relevant to that taxon? [In the Justification field, indicate the relevant water quality variable(s) being | No  | No specific info but closely related <i>Salmo trutta</i> requires cold, well oxygenated upland waters (Luna, Susan M. in Froese, R. and D. Pauly. Editors. 2021. FishBase. World Wide Web electronic publication. <a href="http://www.fishbase.org">www.fishbase.org</a> . ( 02/2021 )).                                                                                                                                                                                                                                                                                                              | Medium    |
| 46                             | 8.03 | Can the taxon be controlled or eradicated in the wild with chemical, biological, or other agents/means?                                                                      | No  | Not allowed in RA area.                                                                                                                                                                                                                                                                                                                                                                                                                                                                                                                                                                               | Very high |
| 47                             | 8.04 | Is the taxon likely to tolerate or benefit from environmental/human disturbance?                                                                                             | No  | Crivelli, A.J. 2006. <i>Salmo macedonicus</i> . The IUCN Red List of Threatened Species 2006: e.T61361A12467912. <a href="https://dx.doi.org/10.2305/IUCN.UK.2006.RLTS.T61361A12467912.en">https://dx.doi.org/10.2305/IUCN.UK.2006.RLTS.T61361A12467912.en</a> . Downloaded on 28 May 2021.                                                                                                                                                                                                                                                                                                           | Medium    |
| 48                             | 8.05 | Is the taxon able to tolerate salinity levels that are higher or lower than those found in its usual environment?                                                            | No  | Only freshwater resident population (Kottelat & Freyhof 2008).                                                                                                                                                                                                                                                                                                                                                                                                                                                                                                                                        | Medium    |
| 49                             | 8.06 | Are there effective natural enemies (predators) of the taxon present in the RA                                                                                               | Yes | Piscivorous birds, fish and mammals are known predators of trouts.                                                                                                                                                                                                                                                                                                                                                                                                                                                                                                                                    | High      |
| <b>C. Climate change</b>       |      |                                                                                                                                                                              |     |                                                                                                                                                                                                                                                                                                                                                                                                                                                                                                                                                                                                       |           |
| <b>9. Climate change</b>       |      |                                                                                                                                                                              |     |                                                                                                                                                                                                                                                                                                                                                                                                                                                                                                                                                                                                       |           |

|    |      |                                                                                                                                                              |                |                                                                                                                                                                                                                                                                                                                                                                                                                                                                                                                                                                                                                                                                                                                                                                                                                                                                                                                                                                                                                                                                                                                                            |           |
|----|------|--------------------------------------------------------------------------------------------------------------------------------------------------------------|----------------|--------------------------------------------------------------------------------------------------------------------------------------------------------------------------------------------------------------------------------------------------------------------------------------------------------------------------------------------------------------------------------------------------------------------------------------------------------------------------------------------------------------------------------------------------------------------------------------------------------------------------------------------------------------------------------------------------------------------------------------------------------------------------------------------------------------------------------------------------------------------------------------------------------------------------------------------------------------------------------------------------------------------------------------------------------------------------------------------------------------------------------------------|-----------|
| 50 | 9.01 | Under the predicted future climatic conditions, are the risks of entry into the RA area posed by the taxon likely to increase, decrease or not change?       | Not applicable | Already present.                                                                                                                                                                                                                                                                                                                                                                                                                                                                                                                                                                                                                                                                                                                                                                                                                                                                                                                                                                                                                                                                                                                           | Very high |
| 51 | 9.02 | Under the predicted future climatic conditions, are the risks of establishment posed by the taxon likely to increase, decrease or not change?                | Decrease       | Trout (brown trout complex) are cold-water fish, they are particularly vulnerable to the effects of global warming, including increasing water temperatures and decreasing flow rates, future changes will reduce the number of potential habitats because of the future water scarcity conditions (Carosi, A., Ghetti, L., Padula, R., Lorenzoni, M., 2020. Population status and ecology of the Salmo trutta complex in an Italian river basin under multiple anthropogenic pressures. <i>Ecology and Evolution</i> 10. 7320–7333..                                                                                                                                                                                                                                                                                                                                                                                                                                                                                                                                                                                                      | Medium    |
| 52 | 9.03 | Under the predicted future climatic conditions, are the risks of dispersal within the RA area posed by the taxon likely to increase, decrease or not change? | Decrease       | Trout (brown trout complex) are cold-water fish, they are particularly vulnerable to the effects of global warming, including increasing water temperatures and decreasing flow rates, future changes will reduce the number of potential habitats because of the future water scarcity conditions (Carosi, A., Ghetti, L., Padula, R., Lorenzoni, M., 2020. Population status and ecology of the Salmo trutta complex in an Italian river basin under multiple anthropogenic pressures. <i>Ecology and Evolution</i> 10. 7320–7333..                                                                                                                                                                                                                                                                                                                                                                                                                                                                                                                                                                                                      | Medium    |
| 53 | 9.04 | Under the predicted future climatic conditions, what is the likely magnitude of future potential impacts on biodiversity and/or ecological integrity/status? | Lower          | Trout (brown trout complex) are cold-water fish, they are particularly vulnerable to the effects of global warming, including increasing water temperatures and decreasing flow rates, future changes will impact the populations of trout because of the future water scarcity conditions (Carosi, A., Ghetti, L., Padula, R., Lorenzoni, M., 2020. Population status and ecology of the Salmo trutta complex in an Italian river basin under multiple anthropogenic pressures. <i>Ecology and Evolution</i> 10, 7320–7333.. doi:10.1002/ece3.6457). As waters warm, cold water species with lower “thermal niches” become competitively disadvantaged with respect to other species for which the warmer temperatures are optimal (Magnuson, J.J., L.B. Crowder, and P.A. Medvick. 1979. Temperature as an ecological resource. <i>Amer. Zool.</i> 19:331-343.)                                                                                                                                                                                                                                                                          | Medium    |
| 54 | 9.05 | Under the predicted future climatic conditions, what is the likely magnitude of future potential impacts on ecosystem structure and/or function?             | Lower          | Trout (brown trout complex) are cold-water fish, they are particularly vulnerable to the effects of global warming, including increasing water temperatures and decreasing flow rates, future changes will impact the populations of trout because of the future water scarcity conditions (Carosi, A., Ghetti, L., Padula, R., Lorenzoni, M., 2020. Population status and ecology of the Salmo trutta complex in an Italian river basin under multiple anthropogenic pressures. <i>Ecology and Evolution</i> 10, 7320–7333.. doi:10.1002/ece3.6457). As waters warm, cold water species with lower “thermal niches” become competitively disadvantaged with respect to other species for which the warmer temperatures are optimal (Magnuson, J.J., L.B. Crowder, and P.A. Medvick. 1979. Temperature as an ecological resource. <i>Amer. Zool.</i> 19:331-343.)                                                                                                                                                                                                                                                                          | Medium    |
| 55 | 9.06 | Under the predicted future climatic conditions, what is the likely magnitude of future potential impacts on ecosystem services/socio-economic factors?       | No change      | Trout (brown trout complex) are cold-water fish, they are particularly vulnerable to the effects of global warming, including increasing water temperatures and decreasing flow rates, future changes will impact the populations of trout, because of the future water scarcity conditions (Carosi, A., Ghetti, L., Padula, R., Lorenzoni, M., 2020. Population status and ecology of the Salmo trutta complex in an Italian river basin under multiple anthropogenic pressures. <i>Ecology and Evolution</i> 10, 7320–7333.. doi:10.1002/ece3.6457). As waters warm, cold water species with lower “thermal niches” become competitively disadvantaged with respect to other species for which the warmer temperatures are optimal (Magnuson, J.J., L.B. Crowder, and P.A. Medvick. 1979. Temperature as an ecological resource. <i>Amer. Zool.</i> 19:331-343.). In this case, adverse impact is recognized as reducing the number of native fish species, especially other Salmonids. With future conditions, both native and introduced Salmonids are predicted to experience reductions in suitable habitats so relative impact will | Low       |

| Statistics                                     |             |
|------------------------------------------------|-------------|
| Scores                                         |             |
| <b>BRA</b>                                     | <b>18.0</b> |
| <b>BRA Outcome</b>                             | <b>-</b>    |
| <b>BRA+CCA</b>                                 | <b>10.0</b> |
| <b>BRA+CCA Outcome</b>                         | <b>-</b>    |
| Score partition                                |             |
| <b>A. Biogeography/Historical</b>              | <b>11.0</b> |
| 1. Domestication/Cultivation                   | 4.0         |
| 2. Climate, distribution and introduction risk | 1.0         |
| 3. Invasive elsewhere                          | 6.0         |
| <b>B. Biology/Ecology</b>                      | <b>7.0</b>  |
| 4. Undesirable (or persistence) traits         | 5.0         |
| 5. Resource exploitation                       | 5.0         |
| 6. Reproduction                                | 2.0         |
| 7. Dispersal mechanisms                        | -1.0        |
| 8. Tolerance attributes                        | -4.0        |
| <b>C. Climate change</b>                       | <b>-8.0</b> |
| 9. Climate change                              | -8.0        |
| Answered Questions                             |             |
| <b>Total</b>                                   | <b>55</b>   |
| <b>A. Biogeography/Historical</b>              | <b>13</b>   |
| 1. Domestication/Cultivation                   | 3           |
| 2. Climate, distribution and introduction risk | 5           |
| 3. Invasive elsewhere                          | 5           |
| <b>B. Biology/Ecology</b>                      | <b>36</b>   |
| 4. Undesirable (or persistence) traits         | 12          |

|                                              |          |
|----------------------------------------------|----------|
| 5. Resource exploitation                     | 2        |
| 6. Reproduction                              | 7        |
| 7. Dispersal mechanisms                      | 9        |
| 8. Tolerance attributes                      | 6        |
| <b>C. Climate change</b>                     | <b>6</b> |
| 9. Climate change                            | 6        |
| <b>Sectors affected</b>                      |          |
| <b>Commercial</b>                            | <b>9</b> |
| <b>Environmental</b>                         | <b>3</b> |
| <b>Species or population nuisance traits</b> | <b>0</b> |

|                   |                |             |
|-------------------|----------------|-------------|
| <b>Thresholds</b> |                |             |
|                   | <b>BRA</b>     | -           |
|                   | <b>BRA+CCA</b> | -           |
| <b>Confidence</b> |                |             |
|                   | <b>BRA+CCA</b> | <b>0.63</b> |
|                   | <b>BRA</b>     | <b>0.64</b> |
|                   | <b>CCA</b>     | <b>0.54</b> |

|                            |  |
|----------------------------|--|
| <b>Date and Time</b>       |  |
| <b>28/05/2021 13:25:22</b> |  |



## AS-ISK v2

| Taxon and Assessor details         |                                         |
|------------------------------------|-----------------------------------------|
| Category                           | Fishes and Lampreys (freshwater)        |
| Taxon name                         | <i>Salmo macedonicus</i>                |
| Common name                        | Macedonian trout                        |
| Assessor                           | Tamara Kanjuh                           |
| Risk screening context             |                                         |
| Reason and socio-economic benefits |                                         |
| Risk assessment area               | Danube & Adriatic basins BA, HR, ME, RS |
| Taxonomy                           |                                         |
| Native range                       |                                         |
| Introduced range                   |                                         |
| URL                                |                                         |

|                                                |      | Response                                                                                                                                                                | Justification (references and/or other information) | Confidence                                                                                                                                                                              |        |
|------------------------------------------------|------|-------------------------------------------------------------------------------------------------------------------------------------------------------------------------|-----------------------------------------------------|-----------------------------------------------------------------------------------------------------------------------------------------------------------------------------------------|--------|
| A. Biogeography/Historical                     |      |                                                                                                                                                                         |                                                     |                                                                                                                                                                                         |        |
| 1. Domestication/Cultivation                   |      |                                                                                                                                                                         |                                                     |                                                                                                                                                                                         |        |
| 1                                              | 1.01 | Has the taxon been the subject of domestication (or cultivation) for at least 20 generations?                                                                           | Yes                                                 | At the beginning the Macedonia fishery was present in freshwater lakes, but after the Second World War, there was a fast development of the aquaculture (Hristovski&Stevanovski, 2005). | High   |
| 2                                              | 1.02 | Is the taxon harvested in the wild and likely to be sold or used in its live form?                                                                                      | Yes                                                 | At the beginning the Macedonia fishery was present in freshwater lakes, but after the Second World War, there was a fast development of the aquaculture (Hristovski&Stevanovski, 2005). | High   |
| 3                                              | 1.03 | Does the taxon have invasive races, varieties, sub-taxa or congeners?                                                                                                   | No                                                  | No information found.                                                                                                                                                                   | Low    |
| 2. Climate, distribution and introduction risk |      |                                                                                                                                                                         |                                                     |                                                                                                                                                                                         |        |
| 4                                              | 2.01 | How similar are the climatic conditions of the Risk Assessment (RA) area and the taxon's native range?                                                                  | High                                                | Dfa, Dfb (Köppen–Geiger climate classification system)                                                                                                                                  | Medium |
| 5                                              | 2.02 | What is the quality of the climate matching data?                                                                                                                       | High                                                | Köppen–Geiger climate classification system                                                                                                                                             | High   |
| 6                                              | 2.03 | Is the taxon already present outside of captivity in the RA area?                                                                                                       | Yes                                                 | Macedonian trout of the AD haplogroup were recorded exclusively in the River Jerma, which strongly suggests their allochthonous character (Simonović et al., 2021).                     | High   |
| 7                                              | 2.04 | How many potential vectors could the taxon use to enter in the RA area?                                                                                                 | One                                                 | Aquaculture (Simonović et al., 2015)                                                                                                                                                    | Medium |
| 8                                              | 2.05 | Is the taxon currently found in close proximity to, and likely to enter into, the RA area in the near future (e.g. unintentional and intentional introductions)?        | Yes                                                 | Jerma River (Simonović et al., 2021)                                                                                                                                                    | High   |
| 3. Invasive elsewhere                          |      |                                                                                                                                                                         |                                                     |                                                                                                                                                                                         |        |
| 9                                              | 3.01 | Has the taxon become naturalised (established viable populations) outside its                                                                                           | Yes                                                 | River Jerma (Simonović et al., 2021)                                                                                                                                                    | High   |
| 10                                             | 3.02 | In the taxon's introduced range, are there known adverse impacts to wild stocks or commercial taxa?                                                                     | Yes                                                 | Possible hybridization with native taxa.                                                                                                                                                | Low    |
| 11                                             | 3.03 | In the taxon's introduced range, are there known adverse impacts to aquaculture?                                                                                        | No                                                  | No information found.                                                                                                                                                                   | Low    |
| 12                                             | 3.04 | In the taxon's introduced range, are there known adverse impacts to ecosystem                                                                                           | No                                                  | No information found.                                                                                                                                                                   | Low    |
| 13                                             | 3.05 | In the taxon's introduced range, are there known adverse socio-economic impacts?                                                                                        | No                                                  | No information found.                                                                                                                                                                   | Low    |
| B. Biology/Ecology                             |      |                                                                                                                                                                         |                                                     |                                                                                                                                                                                         |        |
| 4. Undesirable (or persistence) traits         |      |                                                                                                                                                                         |                                                     |                                                                                                                                                                                         |        |
| 14                                             | 4.01 | Is it likely that the taxon will be poisonous or pose other risks to human health?                                                                                      | No                                                  | No information found.                                                                                                                                                                   | Low    |
| 15                                             | 4.02 | Is it likely that the taxon will smother one or more native taxa (that are not threatened or protected)?                                                                | Yes                                                 | Possible through competition for food, habitat occupation...                                                                                                                            | Low    |
| 16                                             | 4.03 | Are there any threatened or protected taxa that the non-native taxon would parasitise in the RA area?                                                                   | No                                                  | No information found.                                                                                                                                                                   | Low    |
| 17                                             | 4.04 | Is the taxon adaptable in terms of climatic and other environmental conditions, thus enhancing its potential persistence if it has invaded or could invade the RA area? | No                                                  | No information found.                                                                                                                                                                   | Low    |
| 18                                             | 4.05 | Is the taxon likely to disrupt food-web structure/function in aquatic ecosystems if it has invaded or is likely to invade the RA                                        | No                                                  | No information found.                                                                                                                                                                   | Medium |
| 19                                             | 4.06 | Is the taxon likely to exert adverse impacts on ecosystem services in the RA area?                                                                                      | No                                                  | No information found.                                                                                                                                                                   | Low    |
| 20                                             | 4.07 | Is it likely that the taxon will host, and/or act as a vector for, recognised pests and infectious agents that are endemic in the RA                                    | No                                                  | No information found.                                                                                                                                                                   | Low    |
| 21                                             | 4.08 | Is it likely that the taxon will host, and/or act as a vector for, recognised pests and infectious agents that are absent from (novel to) the RA area?                  | No                                                  | No information found.                                                                                                                                                                   | Low    |
| 22                                             | 4.09 | Is it likely that the taxon will achieve a body size that will make it more likely to be released from captivity?                                                       | No                                                  | No information found.                                                                                                                                                                   | Low    |
| 23                                             | 4.10 | Is the taxon capable of sustaining itself in a range of water velocity conditions (e.g. versatile in habitat use)?                                                      | No                                                  | No information found.                                                                                                                                                                   | Low    |
| 24                                             | 4.11 | Is it likely that the taxon's mode of existence (e.g. excretion of by-products) or behaviours (e.g. feeding) will reduce habitat quality for native taxa?               | No                                                  | No information found.                                                                                                                                                                   | Low    |

|                                 |      |                                                                                                                                                                              |           |                                                                                                                                                                                                                                                                                                                                                                                                                                |        |
|---------------------------------|------|------------------------------------------------------------------------------------------------------------------------------------------------------------------------------|-----------|--------------------------------------------------------------------------------------------------------------------------------------------------------------------------------------------------------------------------------------------------------------------------------------------------------------------------------------------------------------------------------------------------------------------------------|--------|
| 25                              | 4.12 | Is the taxon likely to maintain a viable population even when present in low densities (or persisting in adverse conditions by way of a dormant form)?                       | Yes       | The current ecosystem status of the Macedonian trout in the River Jerma is that it naturalised and revealed the strong invasive character (Simonović et al., 2015).                                                                                                                                                                                                                                                            | Medium |
| <b>5. Resource exploitation</b> |      |                                                                                                                                                                              |           |                                                                                                                                                                                                                                                                                                                                                                                                                                |        |
| 26                              | 5.01 | Is the taxon likely to consume threatened or protected native taxa in the RA area?                                                                                           | No        | No information found.                                                                                                                                                                                                                                                                                                                                                                                                          | Low    |
| 27                              | 5.02 | Is the taxon likely to sequester food resources (including nutrients) to the detriment of native taxa in the RA area?                                                        | No        | No information found.                                                                                                                                                                                                                                                                                                                                                                                                          | Low    |
| <b>6. Reproduction</b>          |      |                                                                                                                                                                              |           |                                                                                                                                                                                                                                                                                                                                                                                                                                |        |
| 28                              | 6.01 | Is the taxon likely to exhibit parental care and/or to reduce age-at-maturity in response to environmental conditions?                                                       | No        | No information found.                                                                                                                                                                                                                                                                                                                                                                                                          | Low    |
| 29                              | 6.02 | Is the taxon likely to produce viable gametes or propagules (in the RA area)?                                                                                                | Yes       | The current ecosystem status of the Macedonian trout in the River Jerma is that it naturalised and revealed the strong invasive character (Simonović et al., 2015).                                                                                                                                                                                                                                                            | High   |
| 30                              | 6.03 | Is the taxon likely to hybridise naturally with native taxa?                                                                                                                 | Yes       | Introduction of the tentative Macedonian trout <i>Salmo macedonicus</i> of the AD lineage was also detected in a native population of the tentative <i>S. labrax</i> . In almost all recipient nonmigratory trout populations, a cross-breeding between native and introduced trout was detected by heterozygosity in either only the LDH-C nuclear locus or the LDH-C and specific microsatellite loci (Škraba et al., 2015). | Medium |
| 31                              | 6.04 | Is the taxon likely to be hermaphroditic or to display asexual reproduction?                                                                                                 | No        | No information found.                                                                                                                                                                                                                                                                                                                                                                                                          | Medium |
| 32                              | 6.05 | Is the taxon dependent on the presence of another taxon (or specific habitat features) to complete its life cycle?                                                           | No        | No information found.                                                                                                                                                                                                                                                                                                                                                                                                          | Low    |
| 33                              | 6.06 | Is the taxon known (or likely) to produce a large number of propagules or offspring within a short time span (e.g. < 1 year)?                                                | No        | No information found.                                                                                                                                                                                                                                                                                                                                                                                                          | Low    |
| 34                              | 6.07 | How many time units (days, months, years) does the taxon require to reach the age-at-first-reproduction?                                                                     | 3         | As there is no exact data, it is assumed that, like other members of the genus <i>Salmo</i> , the range of age at sexual or reproductive maturity is 1 to 10 years (animaldiversity.org)                                                                                                                                                                                                                                       | Low    |
| <b>7. Dispersal mechanisms</b>  |      |                                                                                                                                                                              |           |                                                                                                                                                                                                                                                                                                                                                                                                                                |        |
| 35                              | 7.01 | How many potential internal vectors/pathways could the taxon use to disperse within the RA area (with suitable vectors/pathways)?                                            | >1        | Intentional restocking, escape from aquaculture, spreading through water body connections (Simonović et al., 2021).                                                                                                                                                                                                                                                                                                            | Medium |
| 36                              | 7.02 | Will any of these vectors/pathways bring the taxon in close proximity to one or more protected areas (e.g. MCZ, MPA, SSSI)?                                                  | No        | No information found.                                                                                                                                                                                                                                                                                                                                                                                                          | Low    |
| 37                              | 7.03 | Does the taxon have a means of actively attaching itself to hard substrata (e.g. ship hulls, pilings, buoys) such that it enhances the likelihood of dispersal?              | No        | No information found.                                                                                                                                                                                                                                                                                                                                                                                                          | Low    |
| 38                              | 7.04 | Is natural dispersal of the taxon likely to occur as eggs (for animals) or as propagules (for plants: seeds, spores) in the RA area?                                         | No        | No information found.                                                                                                                                                                                                                                                                                                                                                                                                          | Low    |
| 39                              | 7.05 | Is natural dispersal of the taxon likely to occur as larvae/juveniles (for animals) or as fragments/seedlings (for plants) in the RA area?                                   | Yes       | ... spreading in the River Nišava downstream and entering into large tributaries such as the River Temštica (personal observations), with the occasional reports of catches even in the city of Niš, more than 100 km downstream (Simonović et al., 2021).                                                                                                                                                                     | High   |
| 40                              | 7.06 | Are older life stages of the taxon likely to migrate in the RA area for reproduction?                                                                                        | No        | No information found.                                                                                                                                                                                                                                                                                                                                                                                                          | Low    |
| 41                              | 7.07 | Are propagules or eggs of the taxon likely to be dispersed in the RA area by other animals?                                                                                  | No        | No information found.                                                                                                                                                                                                                                                                                                                                                                                                          | Low    |
| 42                              | 7.08 | Is dispersal of the taxon along any of the vectors/pathways mentioned in the previous seven questions (35–41; i.e. both unintentional or intentional) likely to be           | Yes       | Escape from aquaculture.                                                                                                                                                                                                                                                                                                                                                                                                       | Low    |
| 43                              | 7.09 | Is dispersal of the taxon density dependent?                                                                                                                                 | No        | No information found.                                                                                                                                                                                                                                                                                                                                                                                                          | Low    |
| <b>8. Tolerance attributes</b>  |      |                                                                                                                                                                              |           |                                                                                                                                                                                                                                                                                                                                                                                                                                |        |
| 44                              | 8.01 | Is the taxon able to withstand being out of water for extended periods (e.g. minimum of one or more hours) at some stage of its life cycle?                                  | No        | No information found.                                                                                                                                                                                                                                                                                                                                                                                                          | Low    |
| 45                              | 8.02 | Is the taxon tolerant of a wide range of water quality conditions relevant to that taxon? [In the Justification field, indicate the relevant water quality variable(s) being | No        | As no information is available, it is assumed that like most species of the genus <i>Salmonidae</i> , <i>S. macedonicus</i> sensitive to water quality and requires cold, clean, well oxygenated water.                                                                                                                                                                                                                        | Low    |
| 46                              | 8.03 | Can the taxon be controlled or eradicated in the wild with chemical, biological, or other agents/means?                                                                      | No        | No information found.                                                                                                                                                                                                                                                                                                                                                                                                          | Low    |
| 47                              | 8.04 | Is the taxon likely to tolerate or benefit from environmental/human disturbance?                                                                                             | No        | No information found.                                                                                                                                                                                                                                                                                                                                                                                                          | Low    |
| 48                              | 8.05 | Is the taxon able to tolerate salinity levels that are higher or lower than those found in its usual environment?                                                            | No        | No information found.                                                                                                                                                                                                                                                                                                                                                                                                          | Low    |
| 49                              | 8.06 | Are there effective natural enemies (predators) of the taxon present in the RA                                                                                               | No        | No information found.                                                                                                                                                                                                                                                                                                                                                                                                          | Low    |
| <b>C. Climate change</b>        |      |                                                                                                                                                                              |           |                                                                                                                                                                                                                                                                                                                                                                                                                                |        |
| <b>9. Climate change</b>        |      |                                                                                                                                                                              |           |                                                                                                                                                                                                                                                                                                                                                                                                                                |        |
| 50                              | 9.01 | Under the predicted future climatic conditions, are the risks of entry into the RA area posed by the taxon likely to increase, decrease or not change?                       | No change | Similar to other species of the <i>Salmonidae</i> family, <i>S. macedonicus</i> does not tolerate extreme changes and is particularly sensitive to water temperature and oxygen saturation.                                                                                                                                                                                                                                    | Low    |
| 51                              | 9.02 | Under the predicted future climatic conditions, are the risks of establishment posed by the taxon likely to increase, decrease or not change?                                | No change | Similar to other species of the <i>Salmonidae</i> family, <i>S. macedonicus</i> does not tolerate extreme changes and is particularly sensitive to water temperature and oxygen saturation.                                                                                                                                                                                                                                    | Low    |

|    |      |                                                                                                                                                              |           |                                                                                                                                                                                      |     |
|----|------|--------------------------------------------------------------------------------------------------------------------------------------------------------------|-----------|--------------------------------------------------------------------------------------------------------------------------------------------------------------------------------------|-----|
| 52 | 9.03 | Under the predicted future climatic conditions, are the risks of dispersal within the RA area posed by the taxon likely to increase, decrease or not change? | No change | Similar to other species of the Salmonidae family, <i>S. macedonicus</i> does not tolerate extreme changes and is particularly sensitive to water temperature and oxygen saturation. | Low |
| 53 | 9.04 | Under the predicted future climatic conditions, what is the likely magnitude of future potential impacts on biodiversity and/or ecological integrity/status? | No change | Similar to other species of the Salmonidae family, <i>S. macedonicus</i> does not tolerate extreme changes and is particularly sensitive to water temperature and oxygen saturation. | Low |
| 54 | 9.05 | Under the predicted future climatic conditions, what is the likely magnitude of future potential impacts on ecosystem structure and/or function?             | No change | Similar to other species of the Salmonidae family, <i>S. macedonicus</i> does not tolerate extreme changes and is particularly sensitive to water temperature and oxygen saturation. | Low |
| 55 | 9.06 | Under the predicted future climatic conditions, what is the likely magnitude of future potential impacts on ecosystem services/socio-economic factors?       | No change | Similar to other species of the Salmonidae family, <i>S. macedonicus</i> does not tolerate extreme changes and is particularly sensitive to water temperature and oxygen saturation. | Low |

| Statistics                                     |      |
|------------------------------------------------|------|
| Scores                                         |      |
| BRA                                            | 9.0  |
| BRA Outcome                                    | -    |
| BRA+CCA                                        | 9.0  |
| BRA+CCA Outcome                                | -    |
| Score partition                                |      |
| A. Biogeography/Historical                     | 9.0  |
| 1. Domestication/Cultivation                   | 2.0  |
| 2. Climate, distribution and introduction risk | 1.0  |
| 3. Invasive elsewhere                          | 6.0  |
| B. Biology/Ecology                             | 0.0  |
| 4. Undesirable (or persistence) traits         | 1.0  |
| 5. Resource exploitation                       | 0.0  |
| 6. Reproduction                                | 2.0  |
| 7. Dispersal mechanisms                        | -1.0 |
| 8. Tolerance attributes                        | -2.0 |
| C. Climate change                              | 0.0  |
| 9. Climate change                              | 0.0  |
| Answered Questions                             |      |
| Total                                          | 55   |
| A. Biogeography/Historical                     | 13   |
| 1. Domestication/Cultivation                   | 3    |
| 2. Climate, distribution and introduction risk | 5    |
| 3. Invasive elsewhere                          | 5    |
| B. Biology/Ecology                             | 36   |
| 4. Undesirable (or persistence) traits         | 12   |
| 5. Resource exploitation                       | 2    |
| 6. Reproduction                                | 7    |
| 7. Dispersal mechanisms                        | 9    |
| 8. Tolerance attributes                        | 6    |
| C. Climate change                              | 6    |
| 9. Climate change                              | 6    |
| Sectors affected                               |      |
| Commercial                                     | 10   |
| Environmental                                  | 0    |
| Species or population nuisance traits          | 2    |

| Thresholds |      |
|------------|------|
| BRA        | -    |
| BRA+CCA    | -    |
| Confidence |      |
| BRA+CCA    | 0.35 |
| BRA        | 0.37 |
| CCA        | 0.25 |

| Date and Time       |
|---------------------|
| 28/05/2021 09:07:01 |

## AS-ISK v2

| Taxon and Assessor details         |                                         |
|------------------------------------|-----------------------------------------|
| Category                           | Fishes and Lampreys (freshwater)        |
| Taxon name                         | <i>Salmo macedonicus</i>                |
| Common name                        | Macedonian trout                        |
| Assessor                           | Tena Radocaj                            |
| Risk screening context             |                                         |
| Reason and socio-economic benefits |                                         |
| Risk assessment area               | Danube & Adriatic basins BA, HR, ME, RS |
| Taxonomy                           |                                         |
| Native range                       |                                         |
| Introduced range                   |                                         |
| URL                                |                                         |

|                                                |      | Response                                                                                                                                                                | Justification (references and/or other information) | Confidence                                                                                                                                                                                                                                                                                              |           |
|------------------------------------------------|------|-------------------------------------------------------------------------------------------------------------------------------------------------------------------------|-----------------------------------------------------|---------------------------------------------------------------------------------------------------------------------------------------------------------------------------------------------------------------------------------------------------------------------------------------------------------|-----------|
| A. Biogeography/Historical                     |      |                                                                                                                                                                         |                                                     |                                                                                                                                                                                                                                                                                                         |           |
| 1. Domestication/Cultivation                   |      |                                                                                                                                                                         |                                                     |                                                                                                                                                                                                                                                                                                         |           |
| 1                                              | 1.01 | Has the taxon been the subject of domestication (or cultivation) for at least 20 generations?                                                                           | No                                                  | No evidence                                                                                                                                                                                                                                                                                             | Low       |
| 2                                              | 1.02 | Is the taxon harvested in the wild and likely to be sold or used in its live form?                                                                                      | Yes                                                 | Probably (angling)                                                                                                                                                                                                                                                                                      | Low       |
| 3                                              | 1.03 | Does the taxon have invasive races, varieties, sub-taxa or congeners?                                                                                                   | Yes                                                 | Salmo trutta (Fishbase)                                                                                                                                                                                                                                                                                 | High      |
| 2. Climate, distribution and introduction risk |      |                                                                                                                                                                         |                                                     |                                                                                                                                                                                                                                                                                                         |           |
| 4                                              | 2.01 | How similar are the climatic conditions of the Risk Assessment (RA) area and the taxon's native range?                                                                  | High                                                | The similarity between climatic conditions RA area and native range is high. I use climatch.                                                                                                                                                                                                            | Medium    |
| 5                                              | 2.02 | What is the quality of the climate matching data?                                                                                                                       | Medium                                              | Distribution Map and Climatch                                                                                                                                                                                                                                                                           | Medium    |
| 6                                              | 2.03 | Is the taxon already present outside of captivity in the RA area?                                                                                                       | No                                                  | S. macedonicus is not present in the RA area.                                                                                                                                                                                                                                                           | Very high |
| 7                                              | 2.04 | How many potential vectors could the taxon use to enter in the RA area?                                                                                                 | >1                                                  | Stocking and waterways                                                                                                                                                                                                                                                                                  | Medium    |
| 8                                              | 2.05 | Is the taxon currently found in close proximity to, and likely to enter into, the RA area in the near future (e.g. unintentional and intentional introductions)?        | Yes                                                 | Kanjuh, T., Tomić, S., Marić, A., Jurlina, D. Š., Nikolić, V., & Simonović, P. Trout Salmo spp.(Salmoniformes: Salmonidae) Molecular Diversity in Streams on the Southern Slopes of the Stara Planina Mts. in Serbia.                                                                                   | High      |
| 3. Invasive elsewhere                          |      |                                                                                                                                                                         |                                                     |                                                                                                                                                                                                                                                                                                         |           |
| 9                                              | 3.01 | Has the taxon become naturalised (established viable populations) outside its native range?                                                                             | Yes                                                 | Kanjuh, T., Tomić, S., Marić, A., Jurlina, D. Š., Nikolić, V., & Simonović, P. Trout Salmo spp.(Salmoniformes: Salmonidae) Molecular Diversity in Streams on the Southern Slopes of the                                                                                                                 | Low       |
| 10                                             | 3.02 | In the taxon's introduced range, are there known adverse impacts to wild stocks or commercial taxa?                                                                     | No                                                  | No evidence, but probably they compete with native fish species.                                                                                                                                                                                                                                        | Low       |
| 11                                             | 3.03 | In the taxon's introduced range, are there known adverse impacts to aquaculture?                                                                                        | No                                                  | No evidence                                                                                                                                                                                                                                                                                             | Low       |
| 12                                             | 3.04 | In the taxon's introduced range, are there known adverse impacts to ecosystem                                                                                           | No                                                  | Competition (no evidence)                                                                                                                                                                                                                                                                               | Low       |
| 13                                             | 3.05 | In the taxon's introduced range, are there known adverse socio-economic impacts?                                                                                        | No                                                  | No evidence                                                                                                                                                                                                                                                                                             | Low       |
| B. Biology/Ecology                             |      |                                                                                                                                                                         |                                                     |                                                                                                                                                                                                                                                                                                         |           |
| 4. Undesirable (or persistence) traits         |      |                                                                                                                                                                         |                                                     |                                                                                                                                                                                                                                                                                                         |           |
| 14                                             | 4.01 | Is it likely that the taxon will be poisonous or pose other risks to human health?                                                                                      | No                                                  | S. macedonicus is harmless                                                                                                                                                                                                                                                                              | Low       |
| 15                                             | 4.02 | Is it likely that the taxon will smother one or more native taxa (that are not threatened or protected)?                                                                | No                                                  | No evidence                                                                                                                                                                                                                                                                                             | Low       |
| 16                                             | 4.03 | Are there any threatened or protected taxa that the non-native taxon would parasitise in the RA area?                                                                   | No                                                  | No                                                                                                                                                                                                                                                                                                      | Low       |
| 17                                             | 4.04 | Is the taxon adaptable in terms of climatic and other environmental conditions, thus enhancing its potential persistence if it has invaded or could invade the RA area? | Yes                                                 | S. macedonicus will be adaptable to climatic and other environmental conditions. (Kanjuh, T., Tomić, S., Marić, A., Jurlina, D. Š., Nikolić, V., & Simonović, P. Trout Salmo spp.(Salmoniformes: Salmonidae) Molecular Diversity in Streams on the Southern Slopes of the Stara Planina Mts. in Serbia) | Low       |
| 18                                             | 4.05 | Is the taxon likely to disrupt food-web structure/function in aquatic ecosystems if it has invaded or is likely to invade the RA                                        | No                                                  | Competition with native species                                                                                                                                                                                                                                                                         | Low       |
| 19                                             | 4.06 | Is the taxon likely to exert adverse impacts on ecosystem services in the RA area?                                                                                      | No                                                  | S. macedonicus no adverse impacts in the RA area.                                                                                                                                                                                                                                                       | Low       |
| 20                                             | 4.07 | Is it likely that the taxon will host, and/or act as a vector for, recognised pests and infectious agents that are endemic in the RA                                    | Yes                                                 | Yes, the taxon may be a host or vector of known pests and infectious agents endemic to RA area. Because in every area exist infectious agents and pests.                                                                                                                                                | Medium    |
| 21                                             | 4.08 | Is it likely that the taxon will host, and/or act as a vector for, recognised pests and infectious agents that are absent from (novel to) the RA area?                  | Yes                                                 | Yes, the taxon may be a host or vector of known pests and infectious agents endemic to RA area. Because in every area exist infectious agents and pests.                                                                                                                                                | Medium    |
| 22                                             | 4.09 | Is it likely that the taxon will achieve a body size that will make it more likely to be released from captivity?                                                       | Yes                                                 | 40.0 cm SL (Fishbase)                                                                                                                                                                                                                                                                                   | Very high |
| 23                                             | 4.10 | Is the taxon capable of sustaining itself in a range of water velocity conditions (e.g. versatile in habitat use)?                                                      | Yes                                                 | Inhabits stretches with swift water, rapids and small waterfalls (Fishbase)                                                                                                                                                                                                                             | Very high |
| 24                                             | 4.11 | Is it likely that the taxon's mode of existence (e.g. excretion of by-products) or behaviours (e.g. feeding) will reduce habitat quality for native taxa?               | No                                                  | No evidence                                                                                                                                                                                                                                                                                             | Low       |

|                                 |      |                                                                                                                                                                              |                |                                                                                                                                                                                                     |           |
|---------------------------------|------|------------------------------------------------------------------------------------------------------------------------------------------------------------------------------|----------------|-----------------------------------------------------------------------------------------------------------------------------------------------------------------------------------------------------|-----------|
| 25                              | 4.12 | Is the taxon likely to maintain a viable population even when present in low densities (or persisting in adverse conditions by way of a dormant form)?                       | No             | No evidence                                                                                                                                                                                         | Low       |
| <b>5. Resource exploitation</b> |      |                                                                                                                                                                              |                |                                                                                                                                                                                                     |           |
| 26                              | 5.01 | Is the taxon likely to consume threatened or protected native taxa in the RA area?                                                                                           | Yes            | No evidence (personal opinion-yes)                                                                                                                                                                  | Low       |
| 27                              | 5.02 | Is the taxon likely to sequester food resources (including nutrients) to the detriment of native taxa in the RA area?                                                        | Not applicable | Not applicable                                                                                                                                                                                      | Very high |
| <b>6. Reproduction</b>          |      |                                                                                                                                                                              |                |                                                                                                                                                                                                     |           |
| 28                              | 6.01 | Is the taxon likely to exhibit parental care and/or to reduce age-at-maturity in response to environmental conditions?                                                       | No             | No evidence                                                                                                                                                                                         | Low       |
| 29                              | 6.02 | Is the taxon likely to produce viable gametes or propagules (in the RA area)?                                                                                                | Yes            | S. macedonicus can produce viable gamete in the RA area.                                                                                                                                            | Medium    |
| 30                              | 6.03 | Is the taxon likely to hybridise naturally with native taxa?                                                                                                                 | No             | No evidence                                                                                                                                                                                         | Low       |
| 31                              | 6.04 | Is the taxon likely to be hermaphroditic or to display asexual reproduction?                                                                                                 | No             | No                                                                                                                                                                                                  | Low       |
| 32                              | 6.05 | Is the taxon dependent on the presence of another taxon (or specific habitat features) to complete its life cycle?                                                           | No             | No                                                                                                                                                                                                  | Low       |
| 33                              | 6.06 | Is the taxon known (or likely) to produce a large number of propagules or offspring within a short time span (e.g. < 1 year)?                                                | No             | No evidence                                                                                                                                                                                         | Low       |
| 34                              | 6.07 | How many time units (days, months, years) does the taxon require to reach the age-at-first-reproduction?                                                                     | 2              | 2?                                                                                                                                                                                                  | Low       |
| <b>7. Dispersal mechanisms</b>  |      |                                                                                                                                                                              |                |                                                                                                                                                                                                     |           |
| 35                              | 7.01 | How many potential internal vectors/pathways could the taxon use to disperse within the RA area (with suitable vectors/pathways)?                                            | >1             | 1. human influence 2. natural spread via natural and manmade watercourses                                                                                                                           | High      |
| 36                              | 7.02 | Will any of these vectors/pathways bring the taxon in close proximity to one or more protected areas (e.g. MCZ, MPA, SSSI)?                                                  | Yes            | Human influence                                                                                                                                                                                     | Low       |
| 37                              | 7.03 | Does the taxon have a means of actively attaching itself to hard substrata (e.g. ship hulls, pilings, buoys) such that it enhances the likelihood of dispersal?              | No             | No adaptations                                                                                                                                                                                      | Low       |
| 38                              | 7.04 | Is natural dispersal of the taxon likely to occur as eggs (for animals) or as propagules (for plants: seeds, spores) in the RA area?                                         | No             | No evidence                                                                                                                                                                                         | Low       |
| 39                              | 7.05 | Is natural dispersal of the taxon likely to occur as larvae/juveniles (for animals) or as fragments/seedlings (for plants) in the RA area?                                   | Yes            | Probably yes                                                                                                                                                                                        | Low       |
| 40                              | 7.06 | Are older life stages of the taxon likely to migrate in the RA area for reproduction?                                                                                        | Yes            | Yes                                                                                                                                                                                                 | Low       |
| 41                              | 7.07 | Are propagules or eggs of the taxon likely to be dispersed in the RA area by other animals?                                                                                  | No             | No                                                                                                                                                                                                  | Low       |
| 42                              | 7.08 | Is dispersal of the taxon along any of the vectors/pathways mentioned in the previous seven questions (35–41; i.e. both unintentional or intentional) likely to be           | Yes            | There is the possibility of a high rate of dispersal of taxa. E.g. when a fertilized individual enters a new area by some kind of dispersal.                                                        | Low       |
| 43                              | 7.09 | Is dispersal of the taxon density dependent?                                                                                                                                 | Yes            | No evidence                                                                                                                                                                                         | Low       |
| <b>8. Tolerance attributes</b>  |      |                                                                                                                                                                              |                |                                                                                                                                                                                                     |           |
| 44                              | 8.01 | Is the taxon able to withstand being out of water for extended periods (e.g. minimum of one or more hours) at some stage of its life cycle?                                  | No             | Sensitive species                                                                                                                                                                                   | High      |
| 45                              | 8.02 | Is the taxon tolerant of a wide range of water quality conditions relevant to that taxon? [In the Justification field, indicate the relevant water quality variable(s) being | No             | Personal opinion                                                                                                                                                                                    | Low       |
| 46                              | 8.03 | Can the taxon be controlled or eradicated in the wild with chemical, biological, or other agents/means?                                                                      | No             | No evidence                                                                                                                                                                                         | Low       |
| 47                              | 8.04 | Is the taxon likely to tolerate or benefit from environmental/human disturbance?                                                                                             | No             | Future habitat loss, water abstraction, and water pollution. (Crivelli, A.J. 2006. Salmo macedonicus. The IUCN Red List of Threatened Species 2006)                                                 | High      |
| 48                              | 8.05 | Is the taxon able to tolerate salinity levels that are higher or lower than those found in its usual environment?                                                            | No             | Freshwater fish                                                                                                                                                                                     | Low       |
| 49                              | 8.06 | Are there effective natural enemies (predators) of the taxon present in the RA                                                                                               | Yes            | Catfish, Zander, Pike..                                                                                                                                                                             | Medium    |
| <b>C. Climate change</b>        |      |                                                                                                                                                                              |                |                                                                                                                                                                                                     |           |
| <b>9. Climate change</b>        |      |                                                                                                                                                                              |                |                                                                                                                                                                                                     |           |
| 50                              | 9.01 | Under the predicted future climatic conditions, are the risks of entry into the RA area posed by the taxon likely to increase, decrease or not change?                       | No change      | Comte, L., Buisson, L., Daufresne, M., & Grenouillet, G. (2013). Climate-induced changes in the distribution of freshwater fish: observed and predicted trends. Freshwater Biology, 58(4), 625-639. | Medium    |
| 51                              | 9.02 | Under the predicted future climatic conditions, are the risks of establishment posed by the taxon likely to increase, decrease or not change?                                | Decrease       | Comte, L., Buisson, L., Daufresne, M., & Grenouillet, G. (2013). Climate-induced changes in the distribution of freshwater fish: observed and predicted trends. Freshwater Biology, 58(4), 625-639. | Low       |
| 52                              | 9.03 | Under the predicted future climatic conditions, are the risks of dispersal within the RA area posed by the taxon likely to increase, decrease or not change?                 | Decrease       | Comte, L., Buisson, L., Daufresne, M., & Grenouillet, G. (2013). Climate-induced changes in the distribution of freshwater fish: observed and predicted trends. Freshwater Biology, 58(4), 625-639. | Low       |

|    |      |                                                                                                                                                              |           |                                                                                                                                                                                                             |     |
|----|------|--------------------------------------------------------------------------------------------------------------------------------------------------------------|-----------|-------------------------------------------------------------------------------------------------------------------------------------------------------------------------------------------------------------|-----|
| 53 | 9.04 | Under the predicted future climatic conditions, what is the likely magnitude of future potential impacts on biodiversity and/or ecological integrity/status? | No change | Comte, L., Buisson, L., Daufresne, M., & Grenouillet, G. (2013). Climate-induced changes in the distribution of freshwater fish: observed and predicted trends. <i>Freshwater Biology</i> , 58(4), 625-639. | Low |
| 54 | 9.05 | Under the predicted future climatic conditions, what is the likely magnitude of future potential impacts on ecosystem structure and/or function?             | No change | Comte, L., Buisson, L., Daufresne, M., & Grenouillet, G. (2013). Climate-induced changes in the distribution of freshwater fish: observed and predicted trends. <i>Freshwater Biology</i> , 58(4), 625-639. | Low |
| 55 | 9.06 | Under the predicted future climatic conditions, what is the likely magnitude of future potential impacts on ecosystem services/socio-economic factors?       | No change | Comte, L., Buisson, L., Daufresne, M., & Grenouillet, G. (2013). Climate-induced changes in the distribution of freshwater fish: observed and predicted trends. <i>Freshwater Biology</i> , 58(4), 625-639. | Low |

| Statistics                                     |             |
|------------------------------------------------|-------------|
| Scores                                         |             |
| <b>BRA</b>                                     | <b>14.0</b> |
| <b>BRA Outcome</b>                             | <b>-</b>    |
| <b>BRA+CCA</b>                                 | <b>10.0</b> |
| <b>BRA+CCA Outcome</b>                         | <b>-</b>    |
| Score partition                                |             |
| <b>A. Biogeography/Historical</b>              | <b>5.0</b>  |
| 1. Domestication/Cultivation                   | 2.0         |
| 2. Climate, distribution and introduction risk | 1.0         |
| 3. Invasive elsewhere                          | 2.0         |
| <b>B. Biology/Ecology</b>                      | <b>9.0</b>  |
| 4. Undesirable (or persistence) traits         | 5.0         |
| 5. Resource exploitation                       | 5.0         |
| 6. Reproduction                                | 0.0         |
| 7. Dispersal mechanisms                        | 3.0         |
| 8. Tolerance attributes                        | -4.0        |
| <b>C. Climate change</b>                       | <b>-4.0</b> |
| 9. Climate change                              | -4.0        |
| Answered Questions                             |             |
| <b>Total</b>                                   | <b>55</b>   |
| <b>A. Biogeography/Historical</b>              | <b>13</b>   |
| 1. Domestication/Cultivation                   | 3           |
| 2. Climate, distribution and introduction risk | 5           |
| 3. Invasive elsewhere                          | 5           |
| <b>B. Biology/Ecology</b>                      | <b>36</b>   |
| 4. Undesirable (or persistence) traits         | 12          |
| 5. Resource exploitation                       | 2           |
| 6. Reproduction                                | 7           |
| 7. Dispersal mechanisms                        | 9           |
| 8. Tolerance attributes                        | 6           |
| <b>C. Climate change</b>                       | <b>6</b>    |
| 9. Climate change                              | 6           |
| Sectors affected                               |             |
| <b>Commercial</b>                              | <b>4</b>    |
| <b>Environmental</b>                           | <b>6</b>    |
| <b>Species or population nuisance traits</b>   | <b>4</b>    |

| Thresholds     |             |
|----------------|-------------|
| <b>BRA</b>     | <b>-</b>    |
| <b>BRA+CCA</b> | <b>-</b>    |
| Confidence     |             |
| <b>BRA+CCA</b> | <b>0.39</b> |
| <b>BRA</b>     | <b>0.40</b> |
| <b>CCA</b>     | <b>0.29</b> |

| Date and Time       |  |
|---------------------|--|
| 19/05/2021 12:30:19 |  |

## AS-ISK v2

| Taxon and Assessor details         |                                         |
|------------------------------------|-----------------------------------------|
| Category                           | Fishes and Lampreys (freshwater)        |
| Taxon name                         | <i>Salmo obtusirostris</i>              |
| Common name                        | soft-muzzled trout                      |
| Assessor                           | Ana Marić                               |
| Risk screening context             |                                         |
| Reason and socio-economic benefits |                                         |
| Risk assessment area               | Danube & Adriatic basins BA, HR, ME, RS |
| Taxonomy                           |                                         |
| Native range                       |                                         |
| Introduced range                   |                                         |
| URL                                |                                         |

|                                                |      | Response                                                                                                                                                                | Justification (references and/or other information) | Confidence                                                                                                                                                                                                                                        |           |
|------------------------------------------------|------|-------------------------------------------------------------------------------------------------------------------------------------------------------------------------|-----------------------------------------------------|---------------------------------------------------------------------------------------------------------------------------------------------------------------------------------------------------------------------------------------------------|-----------|
| A. Biogeography/Historical                     |      |                                                                                                                                                                         |                                                     |                                                                                                                                                                                                                                                   |           |
| 1. Domestication/Cultivation                   |      |                                                                                                                                                                         |                                                     |                                                                                                                                                                                                                                                   |           |
| 1                                              | 1.01 | Has the taxon been the subject of domestication (or cultivation) for at least 20 generations?                                                                           | Yes                                                 | http://www.musicar.rs/vrste-riba-koje-se-gaje-u-ribnjacima/ Artificial breeding of Neretva softmouth trout ( <i>Salmo obtusirostris oxyrhincus</i> Heckel, 1851). Handžar, D. ; Jažić, A. ; Spasojević, P. 2015 but maybe not for 20 generations? | Very high |
| 2                                              | 1.02 | Is the taxon harvested in the wild and likely to be sold or used in its live form?                                                                                      | Yes                                                 | Službene novine Federacije BiH", br. 63/05 PRAVILNIK O NAČINU, ALATIMA I SREDSTVIMA KOJIMA SE OBAVLJA RIBOLOV                                                                                                                                     | High      |
| 3                                              | 1.03 | Does the taxon have invasive races, varieties, sub-taxa or congeners?                                                                                                   | Yes                                                 | A handbook of global freshwater invasive species. Frencis. 2012.                                                                                                                                                                                  | Very high |
| 2. Climate, distribution and introduction risk |      |                                                                                                                                                                         |                                                     |                                                                                                                                                                                                                                                   |           |
| 4                                              | 2.01 | How similar are the climatic conditions of the Risk Assessment (RA) area and the taxon's native range?                                                                  | High                                                | Its the same latitude and area.                                                                                                                                                                                                                   | High      |
| 5                                              | 2.02 | What is the quality of the climate matching data?                                                                                                                       | High                                                | https://climatch.cp1.agriculture.gov.au/climatch.jsp                                                                                                                                                                                              | High      |
| 6                                              | 2.03 | Is the taxon already present outside of captivity in the RA area?                                                                                                       | Yes                                                 | ZRnovnica                                                                                                                                                                                                                                         | Very high |
| 7                                              | 2.04 | How many potential vectors could the taxon use to enter in the RA area?                                                                                                 | >1                                                  | Stocking and escape from fish farms.                                                                                                                                                                                                              | High      |
| 8                                              | 2.05 | Is the taxon currently found in close proximity to, and likely to enter into, the RA area in the near future (e.g. unintentional and intentional introductions)?        | Yes                                                 | Genetic variation among trout in the River Neretva basin, Bosnia and Herzegovina A. RAZPET, S. SUS` NIK, T. JUG AND A. SNOJ. 2006                                                                                                                 | High      |
| 3. Invasive elsewhere                          |      |                                                                                                                                                                         |                                                     |                                                                                                                                                                                                                                                   |           |
| 9                                              | 3.01 | Has the taxon become naturalised (established viable populations) outside its native range?                                                                             | Yes                                                 | Genetic composition of the Jadro softmouth trout following translocation into a new habitat. Ales` Snøj Æ Andrej Razpet Æ Tea Tomljanovic ÆTomislav Treer Æ Simona Susnik. 2007                                                                   | Very high |
| 10                                             | 3.02 | In the taxon's introduced range, are there known adverse impacts to wild stocks or commercial taxa?                                                                     | No                                                  | Genetic composition of the Jadro softmouth trout following translocation into a new habitat. Ales` Snøj,Andrej Razpet, Tea Tomljanovic, Tomislav Treer,imona Susnik. 2007                                                                         | Very high |
| 11                                             | 3.03 | In the taxon's introduced range, are there known adverse impacts to aquaculture?                                                                                        | No                                                  | Genetic composition of the Jadro softmouth trout following translocation into a new habitat. Ales` Snøj,Andrej Razpet, Tea Tomljanovic, Tomislav Treer,imona Susnik. 2007                                                                         | Very high |
| 12                                             | 3.04 | In the taxon's introduced range, are there known adverse impacts to ecosystem services?                                                                                 | No                                                  | Genetic composition of the Jadro softmouth trout following translocation into a new habitat. Ales` Snøj,Andrej Razpet, Tea Tomljanovic, Tomislav Treer,imona Susnik. 2007                                                                         | Very high |
| 13                                             | 3.05 | In the taxon's introduced range, are there known adverse socio-economic impacts?                                                                                        | No                                                  | Genetic composition of the Jadro softmouth trout following translocation into a new habitat. Ales` Snøj,Andrej Razpet, Tea Tomljanovic, Tomislav Treer,imona Susnik. 2007                                                                         | Very high |
| B. Biology/Ecology                             |      |                                                                                                                                                                         |                                                     |                                                                                                                                                                                                                                                   |           |
| 4. Undesirable (or persistence) traits         |      |                                                                                                                                                                         |                                                     |                                                                                                                                                                                                                                                   |           |
| 14                                             | 4.01 | Is it likely that the taxon will be poisonous or pose other risks to human health?                                                                                      | No                                                  | Handbook of European Freshwater Fishes. 2007. Kottelat and Freyhof                                                                                                                                                                                | Very high |
| 15                                             | 4.02 | Is it likely that the taxon will smother one or more native taxa (that are not threatened or protected)?                                                                | No                                                  | Genetic composition of the Jadro softmouth trout following translocation into a new habitat. Ales` Snøj,Andrej Razpet, Tea Tomljanovic, Tomislav Treer,imona Susnik. 2007                                                                         | Very high |
| 16                                             | 4.03 | Are there any threatened or protected taxa that the non-native taxon would parasitise in the RA area?                                                                   | No                                                  | Handbook of European Freshwater Fishes. 2007. Kottelat and Freyhof                                                                                                                                                                                | Very high |
| 17                                             | 4.04 | Is the taxon adaptable in terms of climatic and other environmental conditions, thus enhancing its potential persistence if it has invaded or could invade the RA area? | Yes                                                 | Note on the growth of endemic soft muzzled trout <i>Salmothymus obtusirostris</i> translocated into Dalmatian river. Treer et al. 2003                                                                                                            | High      |
| 18                                             | 4.05 | Is the taxon likely to disrupt food-web structure/function in aquatic ecosystems if it has invaded or is likely to invade the RA area?                                  | No                                                  | Genetic composition of the Jadro softmouth trout following translocation into a new habitat. Ales` Snøj,Andrej Razpet, Tea Tomljanovic, Tomislav Treer,imona Susnik. 2007                                                                         | Very high |
| 19                                             | 4.06 | Is the taxon likely to exert adverse impacts on ecosystem services in the RA area?                                                                                      | No                                                  | Genetic composition of the Jadro softmouth trout following translocation into a new habitat. Ales` Snøj,Andrej Razpet, Tea Tomljanovic, Tomislav Treer,imona Susnik. 2007                                                                         | High      |
| 20                                             | 4.07 | Is it likely that the taxon will host, and/or act as a vector for, recognised pests and infectious agents that are endemic in the RA area?                              | Yes                                                 | Handbook of European Freshwater Fishes. 2007. Kottelat and Freyhof                                                                                                                                                                                | Very high |
| 21                                             | 4.08 | Is it likely that the taxon will host, and/or act as a vector for, recognised pests and infectious agents that are absent from (novel to) the RA area?                  | No                                                  | It is the very close, practicly same area                                                                                                                                                                                                         | High      |
| 22                                             | 4.09 | Is it likely that the taxon will achieve a body size that will make it more likely to be released from captivity?                                                       | Yes                                                 | From farms.                                                                                                                                                                                                                                       | High      |
| 23                                             | 4.10 | Is the taxon capable of sustaining itself in a range of water velocity conditions (e.g. versatile in habitat use)?                                                      | No                                                  | Ecologically acceptable flows definition for the Žrnovnica River (Croatia) Ognjen Bonacci Mladen Kerovec Tanja Roje-Bonacci... 1998                                                                                                               | High      |

|                                 |      |                                                                                                                                                                              |                |                                                                                                                                                                                                                                                  |           |
|---------------------------------|------|------------------------------------------------------------------------------------------------------------------------------------------------------------------------------|----------------|--------------------------------------------------------------------------------------------------------------------------------------------------------------------------------------------------------------------------------------------------|-----------|
| 24                              | 4.11 | Is it likely that the taxon's mode of existence (e.g. excretion of by-products) or behaviours (e.g. feeding) will reduce habitat quality for native taxa?                    | No             | Ecologically acceptable flows definition for the Žrnovnica River (Croatia) Ognjen Bonacci Mladen Kerovec Tanja Roje-Bonacci... 1998                                                                                                              | High      |
| 25                              | 4.12 | Is the taxon likely to maintain a viable population even when present in low densities (or persisting in adverse conditions by way of a dormant form)?                       | Yes            | Genetic composition of the Jadro softmouth trout following translocation into a new habitat. Ales` Snoj, Andrej Razpet, Tea Tomljanovic, Tomislav Treer, imona Susnik. 2007                                                                      | Very high |
| <b>5. Resource exploitation</b> |      |                                                                                                                                                                              |                |                                                                                                                                                                                                                                                  |           |
| 26                              | 5.01 | Is the taxon likely to consume threatened or protected native taxa in the RA area?                                                                                           | Yes            | Handbook of European Freshwater Fishes. 2007. Kottelat and Freyhof                                                                                                                                                                               | Very high |
| 27                              | 5.02 | Is the taxon likely to sequester food resources (including nutrients) to the detriment of native taxa in the RA area?                                                        | No             | Genetic composition of the Jadro softmouth trout following translocation into a new habitat. Ales` Snoj, Andrej Razpet, Tea Tomljanovic, Tomislav Treer, imona Susnik. 2007                                                                      | Very high |
| <b>6. Reproduction</b>          |      |                                                                                                                                                                              |                |                                                                                                                                                                                                                                                  |           |
| 28                              | 6.01 | Is the taxon likely to exhibit parental care and/or to reduce age-at-maturity in response to environmental conditions?                                                       | No             | No data                                                                                                                                                                                                                                          | Medium    |
| 29                              | 6.02 | Is the taxon likely to produce viable gametes or propagules (in the RA area)?                                                                                                | Yes            | Treer, T., Aničić, I., Safner, R., Odak, T. & Piria, M. (2003): Note on the growth of endemic soft-muzzled trout <i>Salmothymus obtusirostris</i> translocated into a Dalmatian river. <i>Biologia, Bratislava, section Zoology</i> 58, 999–1001 | Very high |
| 30                              | 6.03 | Is the taxon likely to hybridise naturally with native taxa?                                                                                                                 | Yes            | Genetic composition of the Jadro softmouth trout following translocation into a new habitat. Ales` Snoj, Andrej Razpet, Tea Tomljanovic, Tomislav Treer, imona Susnik. 2007                                                                      | Very high |
| 31                              | 6.04 | Is the taxon likely to be hermaphroditic or to display asexual reproduction?                                                                                                 | No             | Handbook of European Freshwater Fishes. 2007. Kottelat and Freyhof                                                                                                                                                                               | Very high |
| 32                              | 6.05 | Is the taxon dependent on the presence of another taxon (or specific habitat features) to complete its life cycle?                                                           | No             | Handbook of European Freshwater Fishes. 2007. Kottelat and Freyhof                                                                                                                                                                               | Very high |
| 33                              | 6.06 | Is the taxon known (or likely) to produce a large number of propagules or offspring within a short time span (e.g. < 1 year)?                                                | Yes            | Handbook of European Freshwater Fishes. 2007. Kottelat and Freyhof                                                                                                                                                                               | High      |
| 34                              | 6.07 | How many time units (days, months, years) does the taxon require to reach the age-at-first-reproduction?                                                                     | 2              | Handbook of European Freshwater Fishes. 2007. Kottelat and Freyhof                                                                                                                                                                               | Medium    |
| <b>7. Dispersal mechanisms</b>  |      |                                                                                                                                                                              |                |                                                                                                                                                                                                                                                  |           |
| 35                              | 7.01 | How many potential internal vectors/pathways could the taxon use to disperse within the RA area (with suitable protected areas (e.g. MCZ, MPA, SSSI)?                        | >1             | Stocking, escape                                                                                                                                                                                                                                 | Medium    |
| 36                              | 7.02 | Will any of these vectors/pathways bring the taxon in close proximity to one or more protected areas (e.g. MCZ, MPA, SSSI)?                                                  | Yes            | Its near the sea area                                                                                                                                                                                                                            | High      |
| 37                              | 7.03 | Does the taxon have a means of actively attaching itself to hard substrata (e.g. ship hulls, pilings, buoys) such that it enhances the likelihood of dispersal?              | No             | Handbook of European Freshwater Fishes. 2007. Kottelat and Freyhof                                                                                                                                                                               | Very high |
| 38                              | 7.04 | Is natural dispersal of the taxon likely to occur as eggs (for animals) or as propagules (for plants: seeds, spores) in the RA area?                                         | No             | Spawning behaviour and the softmouth trout dilemma. 2014. Manu Esteve, Deborah Ann McLennan, John Andrew Zablocki, Gašper Pustovrh, Ignacio Doadrio                                                                                              | Very high |
| 39                              | 7.05 | Is natural dispersal of the taxon likely to occur as larvae/juveniles (for animals) or as fragments/seedlings (for plants) in the RA area?                                   | Yes            | Spawning behaviour and the softmouth trout dilemma. 2014. Manu Esteve, Deborah Ann McLennan, John Andrew Zablocki, Gašper Pustovrh, Ignacio Doadrio                                                                                              | Medium    |
| 40                              | 7.06 | Are older life stages of the taxon likely to migrate in the RA area for reproduction?                                                                                        | Yes            | Note on the growth of endemic soft muzzled trout <i>Salmothymus obtusirostris</i> translocated into Dalmatian river. Treer et al. 2003                                                                                                           | High      |
| 41                              | 7.07 | Are propagules or eggs of the taxon likely to be dispersed in the RA area by other animals?                                                                                  | No             | can only eat them                                                                                                                                                                                                                                | Very high |
| 42                              | 7.08 | Is dispersal of the taxon along any of the vectors/pathways mentioned in the previous seven questions (35–41; i.e. both unintentional or intentional) likely to be           | No             | Genetic composition of the Jadro softmouth trout following translocation into a new habitat. Ales` Snoj, Andrej Razpet, Tea Tomljanovic, Tomislav Treer, imona Susnik. 2007                                                                      | High      |
| 43                              | 7.09 | Is dispersal of the taxon density dependent?                                                                                                                                 | No             | Genetic composition of the Jadro softmouth trout following translocation into a new habitat. Ales` Snoj, Andrej Razpet, Tea Tomljanovic, Tomislav Treer, imona Susnik. 2007                                                                      | High      |
| <b>8. Tolerance attributes</b>  |      |                                                                                                                                                                              |                |                                                                                                                                                                                                                                                  |           |
| 44                              | 8.01 | Is the taxon able to withstand being out of water for extended periods (e.g. minimum of one or more hours) at some stage of its life cycle?                                  | No             | Ecologically acceptable flows definition for the Žrnovnica River (Croatia) Ognjen Bonacci Mladen Kerovec Tanja Roje-Bonacci... 1998                                                                                                              | Very high |
| 45                              | 8.02 | Is the taxon tolerant of a wide range of water quality conditions relevant to that taxon? [In the Justification field, indicate the relevant water quality variable(s) being | No             | Ecologically acceptable flows definition for the Žrnovnica River (Croatia) Ognjen Bonacci Mladen Kerovec Tanja Roje-Bonacci... 1998                                                                                                              | Very high |
| 46                              | 8.03 | Can the taxon be controlled or eradicated in the wild with chemical, biological, or other agents/means?                                                                      | Not applicable | Endangered                                                                                                                                                                                                                                       | Very high |
| 47                              | 8.04 | Is the taxon likely to tolerate or benefit from environmental/human disturbance?                                                                                             | No             | Ecologically acceptable flows definition for the Žrnovnica River (Croatia) Ognjen Bonacci Mladen Kerovec Tanja Roje-Bonacci... 1998                                                                                                              | Very high |
| 48                              | 8.05 | Is the taxon able to tolerate salinity levels that are higher or lower than those found in its usual environment?                                                            | Yes            | Ecologically acceptable flows definition for the Žrnovnica River (Croatia) Ognjen Bonacci Mladen Kerovec Tanja Roje-Bonacci... 1998 anadromous relatives                                                                                         | High      |
| 49                              | 8.06 | Are there effective natural enemies (predators) of the taxon present in the RA                                                                                               | Yes            | Egg eaters and mammals                                                                                                                                                                                                                           | Very high |
| <b>C. Climate change</b>        |      |                                                                                                                                                                              |                |                                                                                                                                                                                                                                                  |           |
| <b>9. Climate change</b>        |      |                                                                                                                                                                              |                |                                                                                                                                                                                                                                                  |           |
| 50                              | 9.01 | Under the predicted future climatic conditions, are the risks of entry into the RA area posed by the taxon likely to increase, decrease or not change?                       | Decrease       | Ecologically acceptable flows definition for the Žrnovnica River (Croatia) Ognjen Bonacci Mladen Kerovec Tanja Roje-Bonacci... 1998                                                                                                              | Very high |



|    |      |                                                                                                                                                              |           |                                                                                                                                     |           |
|----|------|--------------------------------------------------------------------------------------------------------------------------------------------------------------|-----------|-------------------------------------------------------------------------------------------------------------------------------------|-----------|
| 51 | 9.02 | Under the predicted future climatic conditions, are the risks of establishment posed by the taxon likely to increase, decrease or not change?                | Decrease  | Ecologically acceptable flows definition for the Žrnovnica River (Croatia) Ognjen Bonacci Mladen Kerovec Tanja Roje-Bonacci... 1998 | Very high |
| 52 | 9.03 | Under the predicted future climatic conditions, are the risks of dispersal within the RA area posed by the taxon likely to increase, decrease or not change? | Decrease  | Ecologically acceptable flows definition for the Žrnovnica River (Croatia) Ognjen Bonacci Mladen Kerovec Tanja Roje-Bonacci... 1998 | Very high |
| 53 | 9.04 | Under the predicted future climatic conditions, what is the likely magnitude of future potential impacts on biodiversity and/or ecological integrity/status? | Lower     | Ecologically acceptable flows definition for the Žrnovnica River (Croatia) Ognjen Bonacci Mladen Kerovec Tanja Roje-Bonacci... 1998 | Very high |
| 54 | 9.05 | Under the predicted future climatic conditions, what is the likely magnitude of future potential impacts on ecosystem structure and/or function?             | No change | Ecologically acceptable flows definition for the Žrnovnica River (Croatia) Ognjen Bonacci Mladen Kerovec Tanja Roje-Bonacci... 1998 | High      |
| 55 | 9.06 | Under the predicted future climatic conditions, what is the likely magnitude of future potential impacts on ecosystem services/socio-economic factors?       | Lower     | Ecologically acceptable flows definition for the Žrnovnica River (Croatia) Ognjen Bonacci Mladen Kerovec Tanja Roje-Bonacci... 1998 | Very high |

| Statistics                                     |              |
|------------------------------------------------|--------------|
| Scores                                         |              |
| <b>BRA</b>                                     | <b>20.0</b>  |
| <b>BRA Outcome</b>                             | <b>-</b>     |
| <b>BRA+CCA</b>                                 | <b>10.0</b>  |
| <b>BRA+CCA Outcome</b>                         | <b>-</b>     |
| Score partition                                |              |
| <b>A. Biogeography/Historical</b>              | <b>8.0</b>   |
| 1. Domestication/Cultivation                   | 4.0          |
| 2. Climate, distribution and introduction risk | 2.0          |
| 3. Invasive elsewhere                          | 2.0          |
| <b>B. Biology/Ecology</b>                      | <b>12.0</b>  |
| 4. Undesirable (or persistence) traits         | 4.0          |
| 5. Resource exploitation                       | 5.0          |
| 6. Reproduction                                | 3.0          |
| 7. Dispersal mechanisms                        | 1.0          |
| 8. Tolerance attributes                        | -1.0         |
| <b>C. Climate change</b>                       | <b>-10.0</b> |
| 9. Climate change                              | -10.0        |
| Answered Questions                             |              |
| <b>Total</b>                                   | <b>55</b>    |
| <b>A. Biogeography/Historical</b>              | <b>13</b>    |
| 1. Domestication/Cultivation                   | 3            |
| 2. Climate, distribution and introduction risk | 5            |
| 3. Invasive elsewhere                          | 5            |
| <b>B. Biology/Ecology</b>                      | <b>36</b>    |
| 4. Undesirable (or persistence) traits         | 12           |
| 5. Resource exploitation                       | 2            |
| 6. Reproduction                                | 7            |
| 7. Dispersal mechanisms                        | 9            |
| 8. Tolerance attributes                        | 6            |
| <b>C. Climate change</b>                       | <b>6</b>     |
| 9. Climate change                              | 6            |
| Sectors affected                               |              |
| <b>Commercial</b>                              | <b>4</b>     |
| <b>Environmental</b>                           | <b>4</b>     |
| <b>Species or population nuisance traits</b>   | <b>6</b>     |

| Thresholds     |             |
|----------------|-------------|
| <b>BRA</b>     | <b>-</b>    |
| <b>BRA+CCA</b> | <b>-</b>    |
| Confidence     |             |
| <b>BRA+CCA</b> | <b>0.88</b> |
| <b>BRA</b>     | <b>0.87</b> |
| <b>CCA</b>     | <b>0.96</b> |

| Date and Time       |  |
|---------------------|--|
| 15/05/2021 11:25:16 |  |

## AS-ISK v2

| Taxon and Assessor details         |                                         |
|------------------------------------|-----------------------------------------|
| Category                           | Fishes and Lampreys (freshwater)        |
| Taxon name                         | <i>Salmo obtusirostris</i>              |
| Common name                        | soft-muzzled trout                      |
| Assessor                           | Ivan Špelić                             |
| Risk screening context             |                                         |
| Reason and socio-economic benefits |                                         |
| Risk assessment area               | Danube & Adriatic basins BA, HR, ME, RS |
| Taxonomy                           |                                         |
| Native range                       |                                         |
| Introduced range                   |                                         |
| URL                                |                                         |

|                                                |      | Response                                                                                                                                                                | Justification (references and/or other information) | Confidence                                                                                                                                                                                                                                                                                                                             |           |
|------------------------------------------------|------|-------------------------------------------------------------------------------------------------------------------------------------------------------------------------|-----------------------------------------------------|----------------------------------------------------------------------------------------------------------------------------------------------------------------------------------------------------------------------------------------------------------------------------------------------------------------------------------------|-----------|
| A. Biogeography/Historical                     |      |                                                                                                                                                                         |                                                     |                                                                                                                                                                                                                                                                                                                                        |           |
| 1. Domestication/Cultivation                   |      |                                                                                                                                                                         |                                                     |                                                                                                                                                                                                                                                                                                                                        |           |
| 1                                              | 1.01 | Has the taxon been the subject of domestication (or cultivation) for at least 20 generations?                                                                           | Yes                                                 | There is a project of artificial spawning of one subspecies,ongoing for 13 years ( <a href="http://moreikrs.hr/projekti-detajli/A/1">http://moreikrs.hr/projekti-detajli/A/1</a> ).                                                                                                                                                    | Very high |
| 2                                              | 1.02 | Is the taxon harvested in the wild and likely to be sold or used in its live form?                                                                                      | Yes                                                 | For artificial spawning ( <a href="http://moreikrs.hr/projekti-detajli/A/1">http://moreikrs.hr/projekti-detajli/A/1</a> ).                                                                                                                                                                                                             | Very high |
| 3                                              | 1.03 | Does the taxon have invasive races, varieties, sub-taxa or congeners?                                                                                                   | Yes                                                 | Salmo trutta (CABI).                                                                                                                                                                                                                                                                                                                   | Very high |
| 2. Climate, distribution and introduction risk |      |                                                                                                                                                                         |                                                     |                                                                                                                                                                                                                                                                                                                                        |           |
| 4                                              | 2.01 | How similar are the climatic conditions of the Risk Assessment (RA) area and the taxon's native range?                                                                  | High                                                | Same country and same basin (Adriatic basin in Croatia).                                                                                                                                                                                                                                                                               | Very high |
| 5                                              | 2.02 | What is the quality of the climate matching data?                                                                                                                       | High                                                | Within the same region and basin.                                                                                                                                                                                                                                                                                                      | Very high |
| 6                                              | 2.03 | Is the taxon already present outside of captivity in the RA area?                                                                                                       | Yes                                                 | Tomljanović, T. (2014). Endemska mekousna pastrva solinka (Salmo obtusirostris salonitana). Tusculum, 7 (1), 215-224. Preuzeto s <a href="https://hrcak.srce.hr/128484">https://hrcak.srce.hr/128484</a>                                                                                                                               | Very high |
| 7                                              | 2.04 | How many potential vectors could the taxon use to enter in the RA area?                                                                                                 | Not applicable                                      | Already present.                                                                                                                                                                                                                                                                                                                       | Very high |
| 8                                              | 2.05 | Is the taxon currently found in close proximity to, and likely to enter into, the RA area in the near future (e.g. unintentional and intentional introductions)?        | Not applicable                                      | Already present.                                                                                                                                                                                                                                                                                                                       | Very high |
| 3. Invasive elsewhere                          |      |                                                                                                                                                                         |                                                     |                                                                                                                                                                                                                                                                                                                                        |           |
| 9                                              | 3.01 | Has the taxon become naturalised (established viable populations) outside its native range?                                                                             | Yes                                                 | River Žrnovnica in Croatia (Tomljanović, T. (2014). Endemska mekousna pastrva solinka (Salmo obtusirostris salonitana). Tusculum, 7 (1), 215-224. Preuzeto s                                                                                                                                                                           | Very high |
| 10                                             | 3.02 | In the taxon's introduced range, are there known adverse impacts to wild stocks or commercial taxa?                                                                     | No                                                  | There was no fish present prior to stocking of Žrnovnica (Tomljanović, T. (2014). Endemska mekousna pastrva solinka (Salmo obtusirostris salonitana). Tusculum, 7 (1), 215-224. Preuzeto s <a href="https://hrcak.srce.hr/128484">https://hrcak.srce.hr/128484</a> ).                                                                  | Very high |
| 11                                             | 3.03 | In the taxon's introduced range, are there known adverse impacts to aquaculture?                                                                                        | No                                                  | No recorded adverse impacts on aquaculture in the area.                                                                                                                                                                                                                                                                                | Medium    |
| 12                                             | 3.04 | In the taxon's introduced range, are there known adverse impacts to ecosystem                                                                                           | No                                                  | Positive impacts because it is attractive species for angling (pers. comm.).                                                                                                                                                                                                                                                           | Medium    |
| 13                                             | 3.05 | In the taxon's introduced range, are there known adverse socio-economic impacts?                                                                                        | No                                                  | No adverse impact (Tomljanović, T. (2014). Endemska mekousna pastrva solinka (Salmo obtusirostris salonitana). Tusculum, 7 (1), 215-224. Preuzeto s <a href="https://hrcak.srce.hr/128484">https://hrcak.srce.hr/128484</a> ).                                                                                                         | Very high |
| B. Biology/Ecology                             |      |                                                                                                                                                                         |                                                     |                                                                                                                                                                                                                                                                                                                                        |           |
| 4. Undesirable (or persistence) traits         |      |                                                                                                                                                                         |                                                     |                                                                                                                                                                                                                                                                                                                                        |           |
| 14                                             | 4.01 | Is it likely that the taxon will be poisonous or pose other risks to human health?                                                                                      | No                                                  | Harmless (Cruz, Tess in Froese, R. and D. Pauly. Editors. 2021.FishBase. World Wide Web electronic publication. <a href="http://www.fishbase.org">www.fishbase.org</a> , ( 02/2021 )).                                                                                                                                                 | Very high |
| 15                                             | 4.02 | Is it likely that the taxon will smother one or more native taxa (that are not threatened or protected)?                                                                | No                                                  | Not documented for any species.                                                                                                                                                                                                                                                                                                        | Medium    |
| 16                                             | 4.03 | Are there any threatened or protected taxa that the non-native taxon would parasitise in the RA area?                                                                   | No                                                  | No parasitic behaviour.                                                                                                                                                                                                                                                                                                                | Very high |
| 17                                             | 4.04 | Is the taxon adaptable in terms of climatic and other environmental conditions, thus enhancing its potential persistence if it has invaded or could invade the RA area? | No                                                  | Sensitive to water temperatures over 20 deg Celsius, low oxygen levels and pollution (Tomljanović, T. (2014). Endemska mekousna pastrva solinka (Salmo obtusirostris salonitana). Tusculum, 7 (1), 215-224. Preuzeto s <a href="https://hrcak.srce.hr/128484">https://hrcak.srce.hr/128484</a> ).                                      | Very high |
| 18                                             | 4.05 | Is the taxon likely to disrupt food-web structure/function in aquatic ecosystems if it has invaded or is likely to invade the RA                                        | No                                                  | Not documented in literature.                                                                                                                                                                                                                                                                                                          | Medium    |
| 19                                             | 4.06 | Is the taxon likely to exert adverse impacts on ecosystem services in the RA area?                                                                                      | No                                                  | Not documented in introduced area, not likely due to species ecology.                                                                                                                                                                                                                                                                  | Medium    |
| 20                                             | 4.07 | Is it likely that the taxon will host, and/or act as a vector for, recognised pests and infectious agents that are endemic in the RA                                    | Yes                                                 | Most likely susceptible to parasites and pathogens as other congeners (personal opinion).                                                                                                                                                                                                                                              | Low       |
| 21                                             | 4.08 | Is it likely that the taxon will host, and/or act as a vector for, recognised pests and infectious agents that are absent from (novel to) the RA area?                  | Yes                                                 | Most likely susceptible to parasites and pathogens as other congeners (Szczembara, A. 2011. "Gyrodactylus salaris" (On-line), Animal Diversity Web. Accessed May 19, 2021 at <a href="https://animaldiversity.org/accounts/Gyrodactylus_salaris/">https://animaldiversity.org/accounts/Gyrodactylus_salaris/</a> , personal opinion)). | Low       |
| 22                                             | 4.09 | Is it likely that the taxon will achieve a body size that will make it more likely to be released from captivity?                                                       | Yes                                                 | Size to 70 cm (Cruz, Tess in Froese, R. and D. Pauly. Editors. 2021.FishBase. World Wide Web electronic publication. <a href="http://www.fishbase.org">www.fishbase.org</a> , ( 02/2021 )).                                                                                                                                            | Very high |

|                                 |      |                                                                                                                                                                              |                |                                                                                                                                                                                                                                                                                                                                                                                                                                                                                          |           |
|---------------------------------|------|------------------------------------------------------------------------------------------------------------------------------------------------------------------------------|----------------|------------------------------------------------------------------------------------------------------------------------------------------------------------------------------------------------------------------------------------------------------------------------------------------------------------------------------------------------------------------------------------------------------------------------------------------------------------------------------------------|-----------|
| 23                              | 4.10 | Is the taxon capable of sustaining itself in a range of water velocity conditions (e.g. versatile in habitat use)?                                                           | No             | Found only in flowing water with temperature lower than 20 deg C and high oxygen levels (Cruz, Tess in Froese, R. and D. Pauly. Editors. 2021.FishBase. World Wide Web electronic publication. <a href="http://www.fishbase.org">www.fishbase.org</a> , ( 02/2021 )); Tomljanović, T. (2014). Endemska mekousna pastrva solinka (Salmo obtusirostris salonitana). <i>Tusculum</i> , 7 (1), 215-224. Preuzeto s <a href="https://hrcak.srce.hr/128484">https://hrcak.srce.hr/128484</a> . | High      |
| 24                              | 4.11 | Is it likely that the taxon's mode of existence (e.g. excretion of by-products) or behaviours (e.g. feeding) will reduce habitat quality for native taxa?                    | No             | Not likely due to species ecology and preferred habitat (Cruz, Tess in Froese, R. and D. Pauly. Editors. 2021.FishBase. World Wide Web electronic publication. <a href="http://www.fishbase.org">www.fishbase.org</a> , ( 02/2021 )); Tomljanović, T. (2014). Endemska mekousna pastrva solinka (Salmo obtusirostris salonitana). <i>Tusculum</i> , 7 (1), 215-224. Preuzeto s <a href="https://hrcak.srce.hr/128484">https://hrcak.srce.hr/128484</a> .                                 | High      |
| 25                              | 4.12 | Is the taxon likely to maintain a viable population even when present in low densities (or persisting in adverse conditions by way of a dormant form)?                       | No             | Not documented, sensitive and usually restocked to maintain populations in some areas ( <a href="http://moreikrs.hr/projekti-detelji/A/1">http://moreikrs.hr/projekti-detelji/A/1</a> ).                                                                                                                                                                                                                                                                                                 | Medium    |
| <b>5. Resource exploitation</b> |      |                                                                                                                                                                              |                |                                                                                                                                                                                                                                                                                                                                                                                                                                                                                          |           |
| 26                              | 5.01 | Is the taxon likely to consume threatened or protected native taxa in the RA area?                                                                                           | No             | Not likely, feeds on invertebrates (Cruz, Tess in Froese, R. and D. Pauly. Editors. 2021.FishBase. World Wide Web electronic publication. <a href="http://www.fishbase.org">www.fishbase.org</a> , ( 02/2021 ))                                                                                                                                                                                                                                                                          | High      |
| 27                              | 5.02 | Is the taxon likely to sequester food resources (including nutrients) to the detriment of native taxa in the RA area?                                                        | Not applicable | No data.                                                                                                                                                                                                                                                                                                                                                                                                                                                                                 | Very high |
| <b>6. Reproduction</b>          |      |                                                                                                                                                                              |                |                                                                                                                                                                                                                                                                                                                                                                                                                                                                                          |           |
| 28                              | 6.01 | Is the taxon likely to exhibit parental care and/or to reduce age-at-maturity in response to environmental conditions?                                                       | No             | No such adaptations or behaviours documented.                                                                                                                                                                                                                                                                                                                                                                                                                                            | Medium    |
| 29                              | 6.02 | Is the taxon likely to produce viable gametes or propagules (in the RA area)?                                                                                                | Yes            | Already established and spawning in Žrnovnica river where it is translocated (Cruz, Tess in Froese, R. and D. Pauly. Editors. 2021.FishBase. World Wide Web electronic publication. <a href="http://www.fishbase.org">www.fishbase.org</a> , ( 02/2021 ))).                                                                                                                                                                                                                              | Very high |
| 30                              | 6.03 | Is the taxon likely to hybridise naturally with native taxa?                                                                                                                 | Yes            | Hybridizing with brown trout in Žrnovnica, so most likely able to hybridize with all lineages of brown trout (Tomljanović, T. (2014). Endemska mekousna pastrva solinka (Salmo obtusirostris salonitana). <i>Tusculum</i> , 7 (1), 215-224. Preuzeto s <a href="https://hrcak.srce.hr/128484">https://hrcak.srce.hr/128484</a> .                                                                                                                                                         | Very high |
| 31                              | 6.04 | Is the taxon likely to be hermaphroditic or to display asexual reproduction?                                                                                                 | No             | No such adaptations described in literature.                                                                                                                                                                                                                                                                                                                                                                                                                                             | High      |
| 32                              | 6.05 | Is the taxon dependent on the presence of another taxon (or specific habitat features) to complete its life cycle?                                                           | Yes            | Gravel substrate in highly oxygenated streams (Tomljanović, T. (2014). Endemska mekousna pastrva solinka (Salmo obtusirostris salonitana). <i>Tusculum</i> , 7 (1), 215-224. Preuzeto s <a href="https://hrcak.srce.hr/128484">https://hrcak.srce.hr/128484</a> .                                                                                                                                                                                                                        | High      |
| 33                              | 6.06 | Is the taxon known (or likely) to produce a large number of propagules or offspring within a short time span (e.g. < 1 year)?                                                | Yes            | Fecundity of Neretva lineage was determined to be 2000 eggs per female (CEPF FINAL PROJECT COMPLETION REPORT: Education of the public on sustainable water use and the protection of endemic fish in the Neretva River Valley. <a href="https://www.cepf.net/sites/default/files/sq60922-final-report.pdf">https://www.cepf.net/sites/default/files/sq60922-final-report.pdf</a> ).                                                                                                      | High      |
| 34                              | 6.07 | How many time units (days, months, years) does the taxon require to reach the age-at-first-reproduction?                                                                     | 3              | Tomljanović, T. (2014). Endemska mekousna pastrva solinka (Salmo obtusirostris salonitana). <i>Tusculum</i> , 7 (1), 215-224. Preuzeto s <a href="https://hrcak.srce.hr/128484">https://hrcak.srce.hr/128484</a> .                                                                                                                                                                                                                                                                       | High      |
| <b>7. Dispersal mechanisms</b>  |      |                                                                                                                                                                              |                |                                                                                                                                                                                                                                                                                                                                                                                                                                                                                          |           |
| 35                              | 7.01 | How many potential internal vectors/pathways could the taxon use to disperse within the RA area (with suitable vectors/pathways)?                                            | One            | Introductions for angling (personal opinion).                                                                                                                                                                                                                                                                                                                                                                                                                                            | Low       |
| 36                              | 7.02 | Will any of these vectors/pathways bring the taxon in close proximity to one or more protected areas (e.g. MCZ, MPA, SSSI)?                                                  | No             | Already present as native in suitable habitats in some protected areas (Tomljanović, T. (2014). Endemska mekousna pastrva solinka (Salmo obtusirostris salonitana). <i>Tusculum</i> , 7 (1), 215-224. Preuzeto s <a href="https://hrcak.srce.hr/128484">https://hrcak.srce.hr/128484</a> , not expected to be introduced in protected areas far from native range.                                                                                                                       | Low       |
| 37                              | 7.03 | Does the taxon have a means of actively attaching itself to hard substrata (e.g. ship hulls, pilings, buoys) such that it enhances the likelihood of dispersal?              | No             | No such adaptations.                                                                                                                                                                                                                                                                                                                                                                                                                                                                     | Very high |
| 38                              | 7.04 | Is natural dispersal of the taxon likely to occur as eggs (for animals) or as propagules (for plants: seeds, spores) in the RA area?                                         | No             | Eggs deposited in redd on gravel supstrate (Tomljanović, T. (2014). Endemska mekousna pastrva solinka (Salmo obtusirostris salonitana). <i>Tusculum</i> , 7 (1), 215-224. Preuzeto s <a href="https://hrcak.srce.hr/128484">https://hrcak.srce.hr/128484</a> .                                                                                                                                                                                                                           | Medium    |
| 39                              | 7.05 | Is natural dispersal of the taxon likely to occur as larvae/juveniles (for animals) or as fragments/seedlings (for plants) in the RA area?                                   | No             | Very restricted distribution, no documented dispersion except when introduced by human (Žrnovnica) (Tomljanović, T. (2014). Endemska mekousna pastrva solinka (Salmo obtusirostris salonitana). <i>Tusculum</i> , 7 (1), 215-224. Preuzeto s <a href="https://hrcak.srce.hr/128484">https://hrcak.srce.hr/128484</a> .                                                                                                                                                                   | Medium    |
| 40                              | 7.06 | Are older life stages of the taxon likely to migrate in the RA area for reproduction?                                                                                        | No             | Non-migratory (Cruz, Tess in Froese, R. and D. Pauly. Editors. 2021.FishBase. World Wide Web electronic publication. <a href="http://www.fishbase.org">www.fishbase.org</a> , ( 02/2021 ))).                                                                                                                                                                                                                                                                                             | Very high |
| 41                              | 7.07 | Are propagules or eggs of the taxon likely to be dispersed in the RA area by other animals?                                                                                  | No             | Eggs deposited in redds on gravel substrate (Tomljanović, T. (2014). Endemska mekousna pastrva solinka (Salmo obtusirostris salonitana). <i>Tusculum</i> , 7 (1), 215-224. Preuzeto s <a href="https://hrcak.srce.hr/128484">https://hrcak.srce.hr/128484</a> .                                                                                                                                                                                                                          | Medium    |
| 42                              | 7.08 | Is dispersal of the taxon along any of the vectors/pathways mentioned in the previous seven questions (35-41; i.e. both unintentional or intentional) likely to be           | Yes            | Introductions for angling.                                                                                                                                                                                                                                                                                                                                                                                                                                                               | Very high |
| 43                              | 7.09 | Is dispersal of the taxon density dependent?                                                                                                                                 | No             | Very restricted distribution, no documented dispersion except when introduced by human (Žrnovnica) (Tomljanović, T. (2014). Endemska mekousna pastrva solinka (Salmo obtusirostris salonitana). <i>Tusculum</i> , 7 (1), 215-224. Preuzeto s <a href="https://hrcak.srce.hr/128484">https://hrcak.srce.hr/128484</a> .                                                                                                                                                                   | High      |
| <b>8. Tolerance attributes</b>  |      |                                                                                                                                                                              |                |                                                                                                                                                                                                                                                                                                                                                                                                                                                                                          |           |
| 44                              | 8.01 | Is the taxon able to withstand being out of water for extended periods (e.g. minimum of one or more hours) at some stage of its life cycle?                                  | No             | Sensitive species as most Salmonids.                                                                                                                                                                                                                                                                                                                                                                                                                                                     | Very high |
| 45                              | 8.02 | Is the taxon tolerant of a wide range of water quality conditions relevant to that taxon? [In the Justification field, indicate the relevant water quality variable(s) being | No             | Sensitive to any kind of pollution (Tomljanović, T. (2014). Endemska mekousna pastrva solinka (Salmo obtusirostris salonitana). <i>Tusculum</i> , 7 (1), 215-224. Preuzeto s <a href="https://hrcak.srce.hr/128484">https://hrcak.srce.hr/128484</a> .                                                                                                                                                                                                                                   | Very high |

|                          |      |                                                                                                                                                              |                |                                                                                                                                                                                                                                                                                                                                                                                                                                                                                                                                                                                                                                                                                                                        |           |
|--------------------------|------|--------------------------------------------------------------------------------------------------------------------------------------------------------------|----------------|------------------------------------------------------------------------------------------------------------------------------------------------------------------------------------------------------------------------------------------------------------------------------------------------------------------------------------------------------------------------------------------------------------------------------------------------------------------------------------------------------------------------------------------------------------------------------------------------------------------------------------------------------------------------------------------------------------------------|-----------|
| 46                       | 8.03 | Can the taxon be controlled or eradicated in the wild with chemical, biological, or other agents/means?                                                      | Not applicable | Not allowed.                                                                                                                                                                                                                                                                                                                                                                                                                                                                                                                                                                                                                                                                                                           | Very high |
| 47                       | 8.04 | Is the taxon likely to tolerate or benefit from environmental/human disturbance?                                                                             | No             | Endangered because of the habitat degradation, embankment and fragmentation (Very restricted distribution, no documented dispersion except when introduced by human (Žrnovnica) (Tomljanović, T. (2014). Endemska mekousna pastrva solinka (Salmo obtusirostris salonitana). Tuscolum, 7 (1), 215-224. Preuzeto s <a href="https://hrcak.srce.hr/128484">https://hrcak.srce.hr/128484</a> )).                                                                                                                                                                                                                                                                                                                          | Very high |
| 48                       | 8.05 | Is the taxon able to tolerate salinity levels that are higher or lower than those found in its usual environment?                                            | No             | Only freshwater (Very restricted distribution, no documented dispersion except when introduced by human (Žrnovnica) (Tomljanović, T. (2014). Endemska mekousna pastrva solinka (Salmo obtusirostris salonitana). Tuscolum, 7 (1), 215-224. Preuzeto s <a href="https://hrcak.srce.hr/128484">https://hrcak.srce.hr/128484</a> )).                                                                                                                                                                                                                                                                                                                                                                                      | High      |
| 49                       | 8.06 | Are there effective natural enemies (predators) of the taxon present in the RA                                                                               | Yes            | Piscivorous birds and mammals (otters) (personal opinion).                                                                                                                                                                                                                                                                                                                                                                                                                                                                                                                                                                                                                                                             | Medium    |
| <b>C. Climate change</b> |      |                                                                                                                                                              |                |                                                                                                                                                                                                                                                                                                                                                                                                                                                                                                                                                                                                                                                                                                                        |           |
| <b>9. Climate change</b> |      |                                                                                                                                                              |                |                                                                                                                                                                                                                                                                                                                                                                                                                                                                                                                                                                                                                                                                                                                        |           |
| 50                       | 9.01 | Under the predicted future climatic conditions, are the risks of entry into the RA area posed by the taxon likely to increase, decrease or not change?       | Not applicable | Already present.                                                                                                                                                                                                                                                                                                                                                                                                                                                                                                                                                                                                                                                                                                       | Very high |
| 51                       | 9.02 | Under the predicted future climatic conditions, are the risks of establishment posed by the taxon likely to increase, decrease or not change?                | Decrease       | Temperatures over 20 deg. Celsius are lethal (Very restricted distribution, no documented dispersion except when introduced by human (Žrnovnica) (Tomljanović, T. (2014). Endemska mekousna pastrva solinka (Salmo obtusirostris salonitana). Tuscolum, 7 (1), 215-224. Preuzeto s <a href="https://hrcak.srce.hr/128484">https://hrcak.srce.hr/128484</a> )). Predicted decrease in suitable habitats for freshwater species (COMTE, L., BUISSON, L., DAUFRESNE, M. and GRENOUILLET, G. (2013), Climate-induced changes in the distribution of freshwater fish: observed and predicted trends. Freshwater Biology, 58: 625-639. <a href="https://doi.org/10.1111/fwb.12081">https://doi.org/10.1111/fwb.12081</a> )). | High      |
| 52                       | 9.03 | Under the predicted future climatic conditions, are the risks of dispersal within the RA area posed by the taxon likely to increase, decrease or not change? | Decrease       | Temperatures over 20 deg. Celsius are lethal (Very restricted distribution, no documented dispersion except when introduced by human (Žrnovnica) (Tomljanović, T. (2014). Endemska mekousna pastrva solinka (Salmo obtusirostris salonitana). Tuscolum, 7 (1), 215-224. Preuzeto s <a href="https://hrcak.srce.hr/128484">https://hrcak.srce.hr/128484</a> )). Predicted decrease in suitable habitats for freshwater species (COMTE, L., BUISSON, L., DAUFRESNE, M. and GRENOUILLET, G. (2013), Climate-induced changes in the distribution of freshwater fish: observed and predicted trends. Freshwater Biology, 58: 625-639. <a href="https://doi.org/10.1111/fwb.12081">https://doi.org/10.1111/fwb.12081</a> )). | High      |
| 53                       | 9.04 | Under the predicted future climatic conditions, what is the likely magnitude of future potential impacts on biodiversity and/or ecological integrity/status? | No change      | No recognized impact so no possible change expected under less suitable climatic conditions.                                                                                                                                                                                                                                                                                                                                                                                                                                                                                                                                                                                                                           | High      |
| 54                       | 9.05 | Under the predicted future climatic conditions, what is the likely magnitude of future potential impacts on ecosystem structure and/or function?             | No change      | No recognized impact so no possible change expected under less suitable climatic conditions.                                                                                                                                                                                                                                                                                                                                                                                                                                                                                                                                                                                                                           | High      |
| 55                       | 9.06 | Under the predicted future climatic conditions, what is the likely magnitude of future potential impacts on ecosystem services/socio-economic factors?       | No change      | No recognized impact so no possible change expected under less suitable climatic conditions.                                                                                                                                                                                                                                                                                                                                                                                                                                                                                                                                                                                                                           | High      |

| Statistics                                     |             |
|------------------------------------------------|-------------|
| Scores                                         |             |
| <b>BRA</b>                                     | <b>2.0</b>  |
| <b>BRA Outcome</b>                             | <b>-</b>    |
| <b>BRA+CCA</b>                                 | <b>-2.0</b> |
| <b>BRA+CCA Outcome</b>                         | <b>-</b>    |
| Score partition                                |             |
| <b>A. Biogeography/Historical</b>              | <b>7.0</b>  |
| 1. Domestication/Cultivation                   | 4.0         |
| 2. Climate, distribution and introduction risk | 1.0         |
| 3. Invasive elsewhere                          | 2.0         |
| <b>B. Biology/Ecology</b>                      | <b>-5.0</b> |
| 4. Undesirable (or persistence) traits         | 2.0         |
| 5. Resource exploitation                       | 0.0         |
| 6. Reproduction                                | 1.0         |
| 7. Dispersal mechanisms                        | -4.0        |
| 8. Tolerance attributes                        | -4.0        |
| <b>C. Climate change</b>                       | <b>-4.0</b> |
| 9. Climate change                              | -4.0        |
| Answered Questions                             |             |
| <b>Total</b>                                   | <b>55</b>   |
| <b>A. Biogeography/Historical</b>              | <b>13</b>   |
| 1. Domestication/Cultivation                   | 3           |
| 2. Climate, distribution and introduction risk | 5           |
| 3. Invasive elsewhere                          | 5           |
| <b>B. Biology/Ecology</b>                      | <b>36</b>   |
| 4. Undesirable (or persistence) traits         | 12          |
| 5. Resource exploitation                       | 2           |
| 6. Reproduction                                | 7           |
| 7. Dispersal mechanisms                        | 9           |
| 8. Tolerance attributes                        | 6           |
| <b>C. Climate change</b>                       | <b>6</b>    |
| 9. Climate change                              | 6           |
| Sectors affected                               |             |
| <b>Commercial</b>                              | <b>5</b>    |
| <b>Environmental</b>                           | <b>0</b>    |

|                                       |    |
|---------------------------------------|----|
| Species or population nuisance traits | -5 |
|---------------------------------------|----|

| Thresholds |         |      |
|------------|---------|------|
|            | BRA     | -    |
|            | BRA+CCA | -    |
| Confidence |         |      |
|            | BRA+CCA | 0.78 |
|            | BRA     | 0.78 |
|            | CCA     | 0.79 |

| Date and Time       |  |
|---------------------|--|
| 21/05/2021 23:24:21 |  |

## AS-ISK v2

| Taxon and Assessor details         |                                         |
|------------------------------------|-----------------------------------------|
| Category                           | Fishes and Lampreys (freshwater)        |
| Taxon name                         | <i>Salmo obtusirostris</i>              |
| Common name                        | soft-muzzled trout                      |
| Assessor                           | Tamara Kanjuh                           |
| Risk screening context             |                                         |
| Reason and socio-economic benefits |                                         |
| Risk assessment area               | Danube & Adriatic basins BA, HR, ME, RS |
| Taxonomy                           |                                         |
| Native range                       |                                         |
| Introduced range                   |                                         |
| URL                                |                                         |

|                                                |      |                                                                                                                                                                         | Response | Justification (references and/or other information)                                                                                                                                                                                                                                                                                                                 | Confidence |
|------------------------------------------------|------|-------------------------------------------------------------------------------------------------------------------------------------------------------------------------|----------|---------------------------------------------------------------------------------------------------------------------------------------------------------------------------------------------------------------------------------------------------------------------------------------------------------------------------------------------------------------------|------------|
| A. Biogeography / Historical                   |      |                                                                                                                                                                         |          |                                                                                                                                                                                                                                                                                                                                                                     |            |
| 1. Domestication/Cultivation                   |      |                                                                                                                                                                         |          |                                                                                                                                                                                                                                                                                                                                                                     |            |
| 1                                              | 1.01 | Has the taxon been the subject of domestication (or cultivation) for at least 20 generations?                                                                           | Yes      | Fisheries: commercial; gamefish: yes (fishbase.in) This only gregarious trout in the Adriatic Sea drainage area of Montenegro is of the yet unknown potential for fish farming, which is necessary to investigate (Mrdak et al., 2012).                                                                                                                             | Medium     |
| 2                                              | 1.02 | Is the taxon harvested in the wild and likely to be sold or used in its live form?                                                                                      | Yes      | Fisheries: commercial; gamefish: yes (fishbase.in)                                                                                                                                                                                                                                                                                                                  | Medium     |
| 3                                              | 1.03 | Does the taxon have invasive races, varieties, sub-taxa or congeners?                                                                                                   | No       | No information found.                                                                                                                                                                                                                                                                                                                                               | Low        |
| 2. Climate, distribution and introduction risk |      |                                                                                                                                                                         |          |                                                                                                                                                                                                                                                                                                                                                                     |            |
| 4                                              | 2.01 | How similar are the climatic conditions of the Risk Assessment (RA) area and the taxon's native range?                                                                  | High     | Dfa, Dfb (Köppen-Geiger climate classification system)                                                                                                                                                                                                                                                                                                              | High       |
| 5                                              | 2.02 | What is the quality of the climate matching data?                                                                                                                       | High     | Köppen-Geiger climate classification system                                                                                                                                                                                                                                                                                                                         | High       |
| 6                                              | 2.03 | Is the taxon already present outside of captivity in the RA area?                                                                                                       | Yes      | River Žrnovnica (Kottelat&Freyhof, 2007)                                                                                                                                                                                                                                                                                                                            | Medium     |
| 7                                              | 2.04 | How many potential vectors could the taxon use to enter in the RA area?                                                                                                 | One      | Intentional introduction (Treer et al., 2005)                                                                                                                                                                                                                                                                                                                       | Medium     |
| 8                                              | 2.05 | Is the taxon currently found in close proximity to, and likely to enter into, the RA area in the near future (e.g. unintentional and intentional introductions)?        | Yes      | Introduced and established from Jardo to Žrnovnica drainages (Croatia) around 1960 (Kottelat&Freyhof, 2007; Treer et al., 2005).                                                                                                                                                                                                                                    | High       |
| 3. Invasive elsewhere                          |      |                                                                                                                                                                         |          |                                                                                                                                                                                                                                                                                                                                                                     |            |
| 9                                              | 3.01 | Has the taxon become naturalised (established viable populations) outside its                                                                                           | Yes      | Introduced and established from Jardo to Žrnovnica drainages (Croatia) around 1960 (Kottelat&Freyhof, 2007; Treer et al.,                                                                                                                                                                                                                                           | High       |
| 10                                             | 3.02 | In the taxon's introduced range, are there known adverse impacts to wild stocks or commercial taxa?                                                                     | No       | No information found.                                                                                                                                                                                                                                                                                                                                               | Low        |
| 11                                             | 3.03 | In the taxon's introduced range, are there known adverse impacts to aquaculture?                                                                                        | No       | No information found.                                                                                                                                                                                                                                                                                                                                               | Low        |
| 12                                             | 3.04 | In the taxon's introduced range, are there known adverse impacts to ecosystem                                                                                           | No       | No information found.                                                                                                                                                                                                                                                                                                                                               | Low        |
| 13                                             | 3.05 | In the taxon's introduced range, are there known adverse socio-economic impacts?                                                                                        | No       | No information found.                                                                                                                                                                                                                                                                                                                                               | Low        |
| B. Biology / Ecology                           |      |                                                                                                                                                                         |          |                                                                                                                                                                                                                                                                                                                                                                     |            |
| 4. Undesirable (or persistence) traits         |      |                                                                                                                                                                         |          |                                                                                                                                                                                                                                                                                                                                                                     |            |
| 14                                             | 4.01 | Is it likely that the taxon will be poisonous or pose other risks to human health?                                                                                      | No       | Harmless (fishbase.in)                                                                                                                                                                                                                                                                                                                                              | High       |
| 15                                             | 4.02 | Is it likely that the taxon will smother one or more native taxa (that are not threatened or protected)?                                                                | No       | No information found.                                                                                                                                                                                                                                                                                                                                               | Low        |
| 16                                             | 4.03 | Are there any threatened or protected taxa that the non-native taxon would parasitise in the RA area?                                                                   | No       | No information found.                                                                                                                                                                                                                                                                                                                                               | Low        |
| 17                                             | 4.04 | Is the taxon adaptable in terms of climatic and other environmental conditions, thus enhancing its potential persistence if it has invaded or could invade the RA area? | No       | As the result of the very limited distribution and endangerments in its native river Jadro (Povrž et al., 1990; Mrakovčić et al., 1995), which flows through the suburb of the biggest Dalmatian city, this subspecies was sometimes considered extinct (Crivelli, 1995). However, the remains of the population are still present in the upper part of the river . | Low        |
| 18                                             | 4.05 | Is the taxon likely to disrupt food-web structure/function in aquatic ecosystems if it has invaded or is likely to invade the RA                                        | No       | No information found.                                                                                                                                                                                                                                                                                                                                               | Low        |
| 19                                             | 4.06 | Is the taxon likely to exert adverse impacts on ecosystem services in the RA area?                                                                                      | No       | No information found.                                                                                                                                                                                                                                                                                                                                               | Low        |
| 20                                             | 4.07 | Is it likely that the taxon will host, and/or act as a vector for, recognised pests and infectious agents that are endemic in the RA                                    | No       | No information found.                                                                                                                                                                                                                                                                                                                                               | Low        |
| 21                                             | 4.08 | Is it likely that the taxon will host, and/or act as a vector for, recognised pests and infectious agents that are absent from (novel to) the RA area?                  | No       | No information found.                                                                                                                                                                                                                                                                                                                                               | Low        |
| 22                                             | 4.09 | Is it likely that the taxon will achieve a body size that will make it more likely to be released from captivity?                                                       | No       | No information found.                                                                                                                                                                                                                                                                                                                                               | Low        |
| 23                                             | 4.10 | Is the taxon capable of sustaining itself in a range of water velocity conditions (e.g. versatile in habitat use)?                                                      | Yes      | The River Žrnovnica has high flows and water quality so that it is used for drinking water (Bonacci et al., 1998).                                                                                                                                                                                                                                                  | Medium     |
| 24                                             | 4.11 | Is it likely that the taxon's mode of existence (e.g. excretion of by-products) or behaviours (e.g. feeding) will reduce habitat quality for native taxa?               | No       | No information found.                                                                                                                                                                                                                                                                                                                                               | Low        |

|                                 |      |                                                                                                                                                                              |           |                                                                                                                                                                                                                                                                                                              |        |
|---------------------------------|------|------------------------------------------------------------------------------------------------------------------------------------------------------------------------------|-----------|--------------------------------------------------------------------------------------------------------------------------------------------------------------------------------------------------------------------------------------------------------------------------------------------------------------|--------|
| 25                              | 4.12 | Is the taxon likely to maintain a viable population even when present in low densities (or persisting in adverse conditions by way of a dormant form)?                       | Yes       | However, following the rumors that there is still soft-muzzled trout in the Zeta River, we managed to find one population at the locality of the village of Tunjevo (N 42°37' 912"; E 019°01' 016") that was still the only one known and with the ultimately small number of specimens (Sušnik et al. 2007) | Medium |
| <b>5. Resource exploitation</b> |      |                                                                                                                                                                              |           |                                                                                                                                                                                                                                                                                                              |        |
| 26                              | 5.01 | Is the taxon likely to consume threatened or protected native taxa in the RA area?                                                                                           | No        | No information found.                                                                                                                                                                                                                                                                                        | Low    |
| 27                              | 5.02 | Is the taxon likely to sequester food resources (including nutrients) to the detriment of native taxa in the RA area?                                                        | No        | No information found.                                                                                                                                                                                                                                                                                        | Low    |
| <b>6. Reproduction</b>          |      |                                                                                                                                                                              |           |                                                                                                                                                                                                                                                                                                              |        |
| 28                              | 6.01 | Is the taxon likely to exhibit parental care and/or to reduce age-at-maturity in response to environmental conditions?                                                       | No        | No information found.                                                                                                                                                                                                                                                                                        | Low    |
| 29                              | 6.02 | Is the taxon likely to produce viable gametes or propagules (in the RA area)?                                                                                                | Yes       | Established in River Žrnovnica (Kottelat&Freyhof, 2007)                                                                                                                                                                                                                                                      | Medium |
| 30                              | 6.03 | Is the taxon likely to hybridise naturally with native taxa?                                                                                                                 | No        | Neighbour-Joining Tree of individuals showed strong soft-muzzled genotype grouping among all samples and no hybrids among soft-muzzled and other trout genotypes (Mrdak et al., 2012).                                                                                                                       | High   |
| 31                              | 6.04 | Is the taxon likely to be hermaphroditic or to display asexual reproduction?                                                                                                 | No        | No information found.                                                                                                                                                                                                                                                                                        | Low    |
| 32                              | 6.05 | Is the taxon dependent on the presence of another taxon (or specific habitat features) to complete its life cycle?                                                           | No        | No information found.                                                                                                                                                                                                                                                                                        | Medium |
| 33                              | 6.06 | Is the taxon known (or likely) to produce a large number of propagules or offspring within a short time span (e.g. < 1 year)?                                                | No        | No information found.                                                                                                                                                                                                                                                                                        | Low    |
| 34                              | 6.07 | How many time units (days, months, years) does the taxon require to reach the age-at-first-reproduction?                                                                     | 3         | Following the example of other species of the genus Salmo.                                                                                                                                                                                                                                                   | Medium |
| <b>7. Dispersal mechanisms</b>  |      |                                                                                                                                                                              |           |                                                                                                                                                                                                                                                                                                              |        |
| 35                              | 7.01 | How many potential internal vectors/pathways could the taxon use to disperse within the RA area (with suitable vectors/pathways)?                                            | One       | Intentional restocking (Treer et al., 2005)                                                                                                                                                                                                                                                                  | Low    |
| 36                              | 7.02 | Will any of these vectors/pathways bring the taxon in close proximity to one or more protected areas (e.g. MCZ, MPA, SSSI)?                                                  | No        | No information found.                                                                                                                                                                                                                                                                                        | Low    |
| 37                              | 7.03 | Does the taxon have a means of actively attaching itself to hard substrata (e.g. ship hulls, pilings, buoys) such that it enhances the likelihood of dispersal?              | No        | No information found.                                                                                                                                                                                                                                                                                        | Low    |
| 38                              | 7.04 | Is natural dispersal of the taxon likely to occur as eggs (for animals) or as propagules (for plants: seeds, spores) in the RA area?                                         | No        | Dispersion could occur in the juvenile stage.                                                                                                                                                                                                                                                                | Low    |
| 39                              | 7.05 | Is natural dispersal of the taxon likely to occur as larvae/juveniles (for animals) or as fragments/seedlings (for plants) in the RA area?                                   | Yes       | Dispersion could occur in the juvenile stage.                                                                                                                                                                                                                                                                | Low    |
| 40                              | 7.06 | Are older life stages of the taxon likely to migrate in the RA area for reproduction?                                                                                        | No        | Non-migratory (fishbase.in)                                                                                                                                                                                                                                                                                  | Low    |
| 41                              | 7.07 | Are propagules or eggs of the taxon likely to be dispersed in the RA area by other animals?                                                                                  | No        | No information found.                                                                                                                                                                                                                                                                                        | Low    |
| 42                              | 7.08 | Is dispersal of the taxon along any of the vectors/pathways mentioned in the previous seven questions (35–41; i.e. both unintentional or intentional) likely to be           | Yes       | Intentional restocking (Treer et al., 2005)                                                                                                                                                                                                                                                                  | Medium |
| 43                              | 7.09 | Is dispersal of the taxon density dependent?                                                                                                                                 | No        | No information found.                                                                                                                                                                                                                                                                                        | Low    |
| <b>8. Tolerance attributes</b>  |      |                                                                                                                                                                              |           |                                                                                                                                                                                                                                                                                                              |        |
| 44                              | 8.01 | Is the taxon able to withstand being out of water for extended periods (e.g. minimum of one or more hours) at some stage of its life cycle?                                  | No        | The taxon cannot live out of the water.                                                                                                                                                                                                                                                                      | Low    |
| 45                              | 8.02 | Is the taxon tolerant of a wide range of water quality conditions relevant to that taxon? [In the Justification field, indicate the relevant water quality variable(s) being | No        | The taxon is very sensitive to environmental changes.                                                                                                                                                                                                                                                        | Low    |
| 46                              | 8.03 | Can the taxon be controlled or eradicated in the wild with chemical, biological, or other agents/means?                                                                      | No        | No information found.                                                                                                                                                                                                                                                                                        | Low    |
| 47                              | 8.04 | Is the taxon likely to tolerate or benefit from environmental/human disturbance?                                                                                             | No        | The taxon is very sensitive to environmental changes.                                                                                                                                                                                                                                                        | Low    |
| 48                              | 8.05 | Is the taxon able to tolerate salinity levels that are higher or lower than those found in its usual environment?                                                            | No        | The taxon is very sensitive to environmental changes.                                                                                                                                                                                                                                                        | Low    |
| 49                              | 8.06 | Are there effective natural enemies (predators) of the taxon present in the RA                                                                                               | No        | No information found.                                                                                                                                                                                                                                                                                        | Low    |
| <b>C. Climate change</b>        |      |                                                                                                                                                                              |           |                                                                                                                                                                                                                                                                                                              |        |
| <b>9. Climate change</b>        |      |                                                                                                                                                                              |           |                                                                                                                                                                                                                                                                                                              |        |
| 50                              | 9.01 | Under the predicted future climatic conditions, are the risks of entry into the RA area posed by the taxon likely to increase, decrease or not change?                       | No change | The taxon is very sensitive to environmental changes.                                                                                                                                                                                                                                                        | Low    |
| 51                              | 9.02 | Under the predicted future climatic conditions, are the risks of establishment posed by the taxon likely to increase, decrease or not change?                                | No change | The taxon is very sensitive to environmental changes.                                                                                                                                                                                                                                                        | Low    |
| 52                              | 9.03 | Under the predicted future climatic conditions, are the risks of dispersal within the RA area posed by the taxon likely to increase, decrease or not change?                 | No change | The taxon is very sensitive to environmental changes.                                                                                                                                                                                                                                                        | Low    |

|    |      |                                                                                                                                                              |           |                                                       |     |
|----|------|--------------------------------------------------------------------------------------------------------------------------------------------------------------|-----------|-------------------------------------------------------|-----|
| 53 | 9.04 | Under the predicted future climatic conditions, what is the likely magnitude of future potential impacts on biodiversity and/or ecological integrity/status? | No change | The taxon is very sensitive to environmental changes. | Low |
| 54 | 9.05 | Under the predicted future climatic conditions, what is the likely magnitude of future potential impacts on ecosystem structure and/or function?             | No change | The taxon is very sensitive to environmental changes. | Low |
| 55 | 9.06 | Under the predicted future climatic conditions, what is the likely magnitude of future potential impacts on ecosystem services/socio-economic factors?       | No change | The taxon is very sensitive to environmental changes. | Low |

| Statistics                                     |             |
|------------------------------------------------|-------------|
| Scores                                         |             |
| <b>BRA</b>                                     | <b>2.0</b>  |
| <b>BRA Outcome</b>                             | <b>-</b>    |
| <b>BRA+CCA</b>                                 | <b>2.0</b>  |
| <b>BRA+CCA Outcome</b>                         | <b>-</b>    |
| Score partition                                |             |
| <b>A. Biogeography/Historical</b>              | <b>5.0</b>  |
| 1. Domestication/Cultivation                   | 2.0         |
| 2. Climate, distribution and introduction risk | 1.0         |
| 3. Invasive elsewhere                          | 2.0         |
| <b>B. Biology/Ecology</b>                      | <b>-3.0</b> |
| 4. Undesirable (or persistence) traits         | 1.0         |
| 5. Resource exploitation                       | 0.0         |
| 6. Reproduction                                | 0.0         |
| 7. Dispersal mechanisms                        | -2.0        |
| 8. Tolerance attributes                        | -2.0        |
| <b>C. Climate change</b>                       | <b>0.0</b>  |
| 9. Climate change                              | 0.0         |
| Answered Questions                             |             |
| <b>Total</b>                                   | <b>55</b>   |
| <b>A. Biogeography/Historical</b>              | <b>13</b>   |
| 1. Domestication/Cultivation                   | 3           |
| 2. Climate, distribution and introduction risk | 5           |
| 3. Invasive elsewhere                          | 5           |
| <b>B. Biology/Ecology</b>                      | <b>36</b>   |
| 4. Undesirable (or persistence) traits         | 12          |
| 5. Resource exploitation                       | 2           |
| 6. Reproduction                                | 7           |
| 7. Dispersal mechanisms                        | 9           |
| 8. Tolerance attributes                        | 6           |
| <b>C. Climate change</b>                       | <b>6</b>    |
| 9. Climate change                              | 6           |
| Sectors affected                               |             |
| <b>Commercial</b>                              | <b>5</b>    |
| <b>Environmental</b>                           | <b>0</b>    |
| <b>Species or population nuisance traits</b>   | <b>-1</b>   |

| Thresholds     |             |
|----------------|-------------|
| <b>BRA</b>     | <b>-</b>    |
| <b>BRA+CCA</b> | <b>-</b>    |
| Confidence     |             |
| <b>BRA+CCA</b> | <b>0.35</b> |
| <b>BRA</b>     | <b>0.36</b> |
| <b>CCA</b>     | <b>0.25</b> |

| Date and Time       |  |
|---------------------|--|
| 31/05/2021 00:13:04 |  |



## AS-ISK v2

| Taxon and Assessor details         |                                         |
|------------------------------------|-----------------------------------------|
| Category                           | Fishes and Lampreys (freshwater)        |
| Taxon name                         | <i>Salmo obtusirostris</i>              |
| Common name                        | soft-muzzled trout                      |
| Assessor                           | Tena Radocaj                            |
| Risk screening context             |                                         |
| Reason and socio-economic benefits |                                         |
| Risk assessment area               | Danube & Adriatic basins BA, HR, ME, RS |
| Taxonomy                           |                                         |
| Native range                       |                                         |
| Introduced range                   |                                         |
| URL                                |                                         |

|                                                |      | Response                                                                                                                                                                | Justification (references and/or other information) | Confidence                                                                                                                                               |           |
|------------------------------------------------|------|-------------------------------------------------------------------------------------------------------------------------------------------------------------------------|-----------------------------------------------------|----------------------------------------------------------------------------------------------------------------------------------------------------------|-----------|
| A. Biogeography/Historical                     |      |                                                                                                                                                                         |                                                     |                                                                                                                                                          |           |
| 1. Domestication/Cultivation                   |      |                                                                                                                                                                         |                                                     |                                                                                                                                                          |           |
| 1                                              | 1.01 | Has the taxon been the subject of domestication (or cultivation) for at least 20 generations?                                                                           | Yes                                                 | Fisheries: commercial; gamefish: yes (Fishbase)                                                                                                          | High      |
| 2                                              | 1.02 | Is the taxon harvested in the wild and likely to be sold or used in its live form?                                                                                      | Yes                                                 | Fishbase                                                                                                                                                 | Medium    |
| 3                                              | 1.03 | Does the taxon have invasive races, varieties, sub-taxa or congeners?                                                                                                   | Yes                                                 | Salmo trutta (Fishbase)                                                                                                                                  | Very high |
| 2. Climate, distribution and introduction risk |      |                                                                                                                                                                         |                                                     |                                                                                                                                                          |           |
| 4                                              | 2.01 | How similar are the climatic conditions of the Risk Assessment (RA) area and the taxon's native range?                                                                  | High                                                | The similarity between climatic conditions RA area and native range is high. I use climatch.                                                             | High      |
| 5                                              | 2.02 | What is the quality of the climate matching data?                                                                                                                       | Medium                                              | Climatch                                                                                                                                                 | Medium    |
| 6                                              | 2.03 | Is the taxon already present outside of captivity in the RA area?                                                                                                       | Yes                                                 | Tomljanović, T. (2014). Endemska mekousna pastrva solinka (Salmo obtusirostris salonitana). Tusculum, 7 (1), 215-224                                     | Very high |
| 7                                              | 2.04 | How many potential vectors could the taxon use to enter in the RA area?                                                                                                 | Not applicable                                      | S. obtusirostris is present in the RA area.                                                                                                              | Very high |
| 8                                              | 2.05 | Is the taxon currently found in close proximity to, and likely to enter into, the RA area in the near future (e.g. unintentional and intentional introductions)?        | Not applicable                                      | S. obtusirostris is present in the RA area.                                                                                                              | Very high |
| 3. Invasive elsewhere                          |      |                                                                                                                                                                         |                                                     |                                                                                                                                                          |           |
| 9                                              | 3.01 | Has the taxon become naturalised (established viable populations) outside its native range?                                                                             | Yes                                                 | River Žrnovnica in Croatia (Tomljanović, T. (2014). Endemska mekousna pastrva solinka (Salmo obtusirostris salonitana). Tusculum, 7 (1), 215-224.        | High      |
| 10                                             | 3.02 | In the taxon's introduced range, are there known adverse impacts to wild stocks or commercial taxa?                                                                     | No                                                  | No evidence                                                                                                                                              | Low       |
| 11                                             | 3.03 | In the taxon's introduced range, are there known adverse impacts to aquaculture?                                                                                        | No                                                  | No evidence                                                                                                                                              | Low       |
| 12                                             | 3.04 | In the taxon's introduced range, are there known adverse impacts to ecosystem                                                                                           | No                                                  | No evidence                                                                                                                                              | Low       |
| 13                                             | 3.05 | In the taxon's introduced range, are there known adverse socio-economic impacts?                                                                                        | No                                                  | No evidence                                                                                                                                              | Low       |
| B. Biology/Ecology                             |      |                                                                                                                                                                         |                                                     |                                                                                                                                                          |           |
| 4. Undesirable (or persistence) traits         |      |                                                                                                                                                                         |                                                     |                                                                                                                                                          |           |
| 14                                             | 4.01 | Is it likely that the taxon will be poisonous or pose other risks to human health?                                                                                      | No                                                  | Harmless                                                                                                                                                 | Low       |
| 15                                             | 4.02 | Is it likely that the taxon will smother one or more native taxa (that are not threatened or protected)?                                                                | No                                                  | No evidence                                                                                                                                              | Low       |
| 16                                             | 4.03 | Are there any threatened or protected taxa that the non-native taxon would parasitise in the RA area?                                                                   | No                                                  | No evidence                                                                                                                                              | Low       |
| 17                                             | 4.04 | Is the taxon adaptable in terms of climatic and other environmental conditions, thus enhancing its potential persistence if it has invaded or could invade the RA area? | No                                                  | Tomljanović, T. (2014). Endemska mekousna pastrva solinka (Salmo obtusirostris salonitana). Tusculum, 7 (1), 215-224.                                    | Low       |
| 18                                             | 4.05 | Is the taxon likely to disrupt food-web structure/function in aquatic ecosystems if it has invaded or is likely to invade the RA                                        | No                                                  | No evidence                                                                                                                                              | Low       |
| 19                                             | 4.06 | Is the taxon likely to exert adverse impacts on ecosystem services in the RA area?                                                                                      | No                                                  | No evidence                                                                                                                                              | Low       |
| 20                                             | 4.07 | Is it likely that the taxon will host, and/or act as a vector for, recognised pests and infectious agents that are endemic in the RA                                    | Yes                                                 | Yes, the taxon may be a host or vector of known pests and infectious agents endemic to RA area. Because in every area exist infectious agents and pests. | Low       |
| 21                                             | 4.08 | Is it likely that the taxon will host, and/or act as a vector for, recognised pests and infectious agents that are absent from (novel to) the RA area?                  | Yes                                                 | Yes, the taxon may be a host or vector of known pests and infectious agents endemic to RA area. Because in every area exist infectious agents and pests. | Low       |
| 22                                             | 4.09 | Is it likely that the taxon will achieve a body size that will make it more likely to be released from captivity?                                                       | Yes                                                 | 70.0 cm SL (Fishbase)                                                                                                                                    | Very high |
| 23                                             | 4.10 | Is the taxon capable of sustaining itself in a range of water velocity conditions (e.g. versatile in habitat use)?                                                      | No                                                  | Kottelat, M. and J. Freyhof, 2007. Handbook of European freshwater fishes. Publications Kottelat, Cornol and Freyhof, Berlin. 646 pp                     | Low       |
| 24                                             | 4.11 | Is it likely that the taxon's mode of existence (e.g. excretion of by-products) or behaviours (e.g. feeding) will reduce habitat quality for native taxa?               | No                                                  | Kottelat, M. and J. Freyhof, 2007. Handbook of European freshwater fishes. Publications Kottelat, Cornol and Freyhof, Berlin. 646 pp                     | Low       |

|                                 |      |                                                                                                                                                                              |                |                                                                                                                                                                                                     |           |
|---------------------------------|------|------------------------------------------------------------------------------------------------------------------------------------------------------------------------------|----------------|-----------------------------------------------------------------------------------------------------------------------------------------------------------------------------------------------------|-----------|
| 25                              | 4.12 | Is the taxon likely to maintain a viable population even when present in low densities (or persisting in adverse conditions by way of a dormant form)?                       | No             | Kottelat, M. and J. Freyhof, 2007. Handbook of European freshwater fishes. Publications Kottelat, Cornol and Freyhof, Berlin. 646 pp                                                                | Low       |
| <b>5. Resource exploitation</b> |      |                                                                                                                                                                              |                |                                                                                                                                                                                                     |           |
| 26                              | 5.01 | Is the taxon likely to consume threatened or protected native taxa in the RA area?                                                                                           | No             | Kottelat, M. and J. Freyhof, 2007. Handbook of European freshwater fishes. Publications Kottelat, Cornol and Freyhof,                                                                               | Low       |
| 27                              | 5.02 | Is the taxon likely to sequester food resources (including nutrients) to the detriment of native taxa in the RA area?                                                        | Not applicable | Not applicable                                                                                                                                                                                      | Very high |
| <b>6. Reproduction</b>          |      |                                                                                                                                                                              |                |                                                                                                                                                                                                     |           |
| 28                              | 6.01 | Is the taxon likely to exhibit parental care and/or to reduce age-at-maturity in response to environmental conditions?                                                       | No             | Kottelat, M. and J. Freyhof, 2007. Handbook of European freshwater fishes. Publications Kottelat, Cornol and Freyhof, Berlin. 646 pp                                                                | Medium    |
| 29                              | 6.02 | Is the taxon likely to produce viable gametes or propagules (in the RA area)?                                                                                                | Yes            | Kottelat, M. and J. Freyhof, 2007. Handbook of European freshwater fishes. Publications Kottelat, Cornol and Freyhof,                                                                               | High      |
| 30                              | 6.03 | Is the taxon likely to hybridise naturally with native taxa?                                                                                                                 | Yes            | Hybridizing with brown trout in Žrnovnica, (Tomljanović, T. (2014). Endemska mekousna pastrva solinka (Salmo obtusirostris salonitana). Tusculum, 7 (1), 215-224).                                  | Very high |
| 31                              | 6.04 | Is the taxon likely to be hermaphroditic or to display asexual reproduction?                                                                                                 | No             | No evidence                                                                                                                                                                                         | Low       |
| 32                              | 6.05 | Is the taxon dependent on the presence of another taxon (or specific habitat features) to complete its life cycle?                                                           | Yes            | Gravel substrate in highly oxygenated streams (Tomljanović, T. (2014). Endemska mekousna pastrva solinka (Salmo obtusirostris salonitana). Tusculum, 7 (1), 215-224.                                | Medium    |
| 33                              | 6.06 | Is the taxon known (or likely) to produce a large number of propagules or offspring within a short time span (e.g. < 1 year)?                                                | Yes            | Tomljanović, T. (2014). Endemska mekousna pastrva solinka (Salmo obtusirostris salonitana). Tusculum, 7 (1), 215-224.                                                                               | High      |
| 34                              | 6.07 | How many time units (days, months, years) does the taxon require to reach the age-at-first-reproduction?                                                                     | 3              | Tomljanović, T. (2014). Endemska mekousna pastrva solinka (Salmo obtusirostris salonitana). Tusculum, 7 (1), 215-224.                                                                               | High      |
| <b>7. Dispersal mechanisms</b>  |      |                                                                                                                                                                              |                |                                                                                                                                                                                                     |           |
| 35                              | 7.01 | How many potential internal vectors/pathways could the taxon use to disperse within the RA area (with suitable protected areas (e.g. MCZ, MPA, SSSI)?                        | One            | Human influence                                                                                                                                                                                     | Very high |
| 36                              | 7.02 | Will any of these vectors/pathways bring the taxon in close proximity to one or more protected areas (e.g. MCZ, MPA, SSSI)?                                                  | No             | No                                                                                                                                                                                                  | Low       |
| 37                              | 7.03 | Does the taxon have a means of actively attaching itself to hard substrata (e.g. ship hulls, pilings, buoys) such that it enhances the likelihood of dispersal?              | No             | No adaptations                                                                                                                                                                                      | High      |
| 38                              | 7.04 | Is natural dispersal of the taxon likely to occur as eggs (for animals) or as propagules (for plants: seeds, spores) in the RA area?                                         | No             | Tomljanović, T. (2014). Endemska mekousna pastrva solinka (Salmo obtusirostris salonitana). Tusculum, 7 (1), 215-224.                                                                               | Low       |
| 39                              | 7.05 | Is natural dispersal of the taxon likely to occur as larvae/juveniles (for animals) or as fragments/seedlings (for plants) in the RA area?                                   | No             | Tomljanović, T. (2014). Endemska mekousna pastrva solinka (Salmo obtusirostris salonitana). Tusculum, 7 (1), 215-224.                                                                               | Low       |
| 40                              | 7.06 | Are older life stages of the taxon likely to migrate in the RA area for reproduction?                                                                                        | No             | Tomljanović, T. (2014). Endemska mekousna pastrva solinka (Salmo obtusirostris salonitana). Tusculum, 7 (1), 215-224.                                                                               | Low       |
| 41                              | 7.07 | Are propagules or eggs of the taxon likely to be dispersed in the RA area by other animals?                                                                                  | No             | Tomljanović, T. (2014). Endemska mekousna pastrva solinka (Salmo obtusirostris salonitana). Tusculum, 7 (1), 215-224.                                                                               | Low       |
| 42                              | 7.08 | Is dispersal of the taxon along any of the vectors/pathways mentioned in the previous seven questions (35-41; i.e. both unintentional or intentional) likely to be           | Yes            | Tomljanović, T. (2014). Endemska mekousna pastrva solinka (Salmo obtusirostris salonitana). Tusculum, 7 (1), 215-224.                                                                               | Medium    |
| 43                              | 7.09 | Is dispersal of the taxon density dependent?                                                                                                                                 | No             | Tomljanović, T. (2014). Endemska mekousna pastrva solinka (Salmo obtusirostris salonitana). Tusculum, 7 (1), 215-224.                                                                               | Low       |
| <b>8. Tolerance attributes</b>  |      |                                                                                                                                                                              |                |                                                                                                                                                                                                     |           |
| 44                              | 8.01 | Is the taxon able to withstand being out of water for extended periods (e.g. minimum of one or more hours) at some stage of its life cycle?                                  | No             | Tomljanović, T. (2014). Endemska mekousna pastrva solinka (Salmo obtusirostris salonitana). Tusculum, 7 (1), 215-224.                                                                               | Low       |
| 45                              | 8.02 | Is the taxon tolerant of a wide range of water quality conditions relevant to that taxon? [In the Justification field, indicate the relevant water quality variable(s) being | No             | Tomljanović, T. (2014). Endemska mekousna pastrva solinka (Salmo obtusirostris salonitana). Tusculum, 7 (1), 215-224.                                                                               | Low       |
| 46                              | 8.03 | Can the taxon be controlled or eradicated in the wild with chemical, biological, or other agents/means?                                                                      | No             | Not applicable                                                                                                                                                                                      | Very high |
| 47                              | 8.04 | Is the taxon likely to tolerate or benefit from environmental/human disturbance?                                                                                             | No             | Tomljanović, T. (2014). Endemska mekousna pastrva solinka (Salmo obtusirostris salonitana). Tusculum, 7 (1), 215-224.                                                                               | Low       |
| 48                              | 8.05 | Is the taxon able to tolerate salinity levels that are higher or lower than those found in its usual environment?                                                            | No             | Tomljanović, T. (2014). Endemska mekousna pastrva solinka (Salmo obtusirostris salonitana). Tusculum, 7 (1), 215-224.                                                                               | Low       |
| 49                              | 8.06 | Are there effective natural enemies (predators) of the taxon present in the RA                                                                                               | Yes            | Catfish, Pike..                                                                                                                                                                                     | High      |
| <b>C. Climate change</b>        |      |                                                                                                                                                                              |                |                                                                                                                                                                                                     |           |
| <b>9. Climate change</b>        |      |                                                                                                                                                                              |                |                                                                                                                                                                                                     |           |
| 50                              | 9.01 | Under the predicted future climatic conditions, are the risks of entry into the RA area posed by the taxon likely to increase, decrease or not change?                       | Not applicable | It is present in the RA area                                                                                                                                                                        | Very high |
| 51                              | 9.02 | Under the predicted future climatic conditions, are the risks of establishment posed by the taxon likely to increase, decrease or not change?                                | Decrease       | Comte, L., Buisson, L., Daufresne, M., & Grenouillet, G. (2013). Climate-induced changes in the distribution of freshwater fish: observed and predicted trends. Freshwater Biology, 58(4), 625-639. | Low       |
| 52                              | 9.03 | Under the predicted future climatic conditions, are the risks of dispersal within the RA area posed by the taxon likely to increase, decrease or not change?                 | Decrease       | Comte, L., Buisson, L., Daufresne, M., & Grenouillet, G. (2013). Climate-induced changes in the distribution of freshwater fish: observed and predicted trends. Freshwater Biology, 58(4), 625-639. | Low       |

|    |      |                                                                                                                                                              |           |                                                                                                                                                                                                             |        |
|----|------|--------------------------------------------------------------------------------------------------------------------------------------------------------------|-----------|-------------------------------------------------------------------------------------------------------------------------------------------------------------------------------------------------------------|--------|
| 53 | 9.04 | Under the predicted future climatic conditions, what is the likely magnitude of future potential impacts on biodiversity and/or ecological integrity/status? | No change | Comte, L., Buisson, L., Daufresne, M., & Grenouillet, G. (2013). Climate-induced changes in the distribution of freshwater fish: observed and predicted trends. <i>Freshwater Biology</i> , 58(4), 625-639. | Medium |
| 54 | 9.05 | Under the predicted future climatic conditions, what is the likely magnitude of future potential impacts on ecosystem structure and/or function?             | No change | Comte, L., Buisson, L., Daufresne, M., & Grenouillet, G. (2013). Climate-induced changes in the distribution of freshwater fish: observed and predicted trends. <i>Freshwater Biology</i> , 58(4), 625-639. | Medium |
| 55 | 9.06 | Under the predicted future climatic conditions, what is the likely magnitude of future potential impacts on ecosystem services/socio-economic factors?       | No change | Comte, L., Buisson, L., Daufresne, M., & Grenouillet, G. (2013). Climate-induced changes in the distribution of freshwater fish: observed and predicted trends. <i>Freshwater Biology</i> , 58(4), 625-639. | Medium |

| Statistics                                     |             |
|------------------------------------------------|-------------|
| Scores                                         |             |
| <b>BRA</b>                                     | <b>2.0</b>  |
| <b>BRA Outcome</b>                             | <b>-</b>    |
| <b>BRA+CCA</b>                                 | <b>-2.0</b> |
| <b>BRA+CCA Outcome</b>                         | <b>-</b>    |
| Score partition                                |             |
| <b>A. Biogeography/Historical</b>              | <b>7.0</b>  |
| 1. Domestication/Cultivation                   | 4.0         |
| 2. Climate, distribution and introduction risk | 1.0         |
| 3. Invasive elsewhere                          | 2.0         |
| <b>B. Biology/Ecology</b>                      | <b>-5.0</b> |
| 4. Undesirable (or persistence) traits         | 2.0         |
| 5. Resource exploitation                       | 0.0         |
| 6. Reproduction                                | 1.0         |
| 7. Dispersal mechanisms                        | -4.0        |
| 8. Tolerance attributes                        | -4.0        |
| <b>C. Climate change</b>                       | <b>-4.0</b> |
| 9. Climate change                              | -4.0        |
| Answered Questions                             |             |
| <b>Total</b>                                   | <b>55</b>   |
| <b>A. Biogeography/Historical</b>              | <b>13</b>   |
| 1. Domestication/Cultivation                   | 3           |
| 2. Climate, distribution and introduction risk | 5           |
| 3. Invasive elsewhere                          | 5           |
| <b>B. Biology/Ecology</b>                      | <b>36</b>   |
| 4. Undesirable (or persistence) traits         | 12          |
| 5. Resource exploitation                       | 2           |
| 6. Reproduction                                | 7           |
| 7. Dispersal mechanisms                        | 9           |
| 8. Tolerance attributes                        | 6           |
| <b>C. Climate change</b>                       | <b>6</b>    |
| 9. Climate change                              | 6           |
| Sectors affected                               |             |
| <b>Commercial</b>                              | <b>5</b>    |
| <b>Environmental</b>                           | <b>0</b>    |
| <b>Species or population nuisance traits</b>   | <b>-5</b>   |

| Thresholds     |             |
|----------------|-------------|
| <b>BRA</b>     | <b>-</b>    |
| <b>BRA+CCA</b> | <b>-</b>    |
| Confidence     |             |
| <b>BRA+CCA</b> | <b>0.50</b> |
| <b>BRA</b>     | <b>0.49</b> |
| <b>CCA</b>     | <b>0.50</b> |

| Date and Time       |  |
|---------------------|--|
| 02/06/2021 07:39:34 |  |

AS-ISK v2

| Taxon and Assessor details         |                                         |
|------------------------------------|-----------------------------------------|
| Category                           | Fishes and Lampreys (freshwater)        |
| Taxon name                         | <i>Salmo salar</i>                      |
| Common name                        | Atlantic salmon                         |
| Assessor                           | Ana Marić                               |
| Risk screening context             |                                         |
| Reason and socio-economic benefits |                                         |
| Risk assessment area               | Danube & Adriatic basins BA, HR, ME, RS |
| Taxonomy                           |                                         |
| Native range                       |                                         |
| Introduced range                   |                                         |
| URL                                |                                         |

|                                                |      | Response                                                                                                                                                                | Justification (references and/or other information) | Confidence                                                                                                                                                                                                                                    |           |
|------------------------------------------------|------|-------------------------------------------------------------------------------------------------------------------------------------------------------------------------|-----------------------------------------------------|-----------------------------------------------------------------------------------------------------------------------------------------------------------------------------------------------------------------------------------------------|-----------|
| A. Biogeography/Historical                     |      |                                                                                                                                                                         |                                                     |                                                                                                                                                                                                                                               |           |
| 1. Domestication/Cultivation                   |      |                                                                                                                                                                         |                                                     |                                                                                                                                                                                                                                               |           |
| 1                                              | 1.01 | Has the taxon been the subject of domestication (or cultivation) for at least 20 generations?                                                                           | Yes                                                 | Kottelat, M. and J. Freyhof, 2007. Handbook of European freshwater fishes. Publications Kottelat, Cornol and Freyhof, Berlin. 646 pp.                                                                                                         | Very high |
| 2                                              | 1.02 | Is the taxon harvested in the wild and likely to be sold or used in its live form?                                                                                      | Yes                                                 | Kottelat, M. and J. Freyhof, 2007. Handbook of European freshwater fishes. Publications Kottelat, Cornol and Freyhof, Berlin. 646 pp.                                                                                                         | Very high |
| 3                                              | 1.03 | Does the taxon have invasive races, varieties, sub-taxa or congeners?                                                                                                   | Yes                                                 | A handbook of global freshwater invasive species. Francis. 2012. <i>Salmo trutta</i>                                                                                                                                                          | Very high |
| 2. Climate, distribution and introduction risk |      |                                                                                                                                                                         |                                                     |                                                                                                                                                                                                                                               |           |
| 4                                              | 2.01 | How similar are the climatic conditions of the Risk Assessment (RA) area and the taxon's native range?                                                                  | Medium                                              | There is a wide range of native dispersal of <i>S.salar</i> 35-70 lat but only small variations in water temperature. 11 in yellow no 5 in target region, 14 matcher, 5 of 23 with high compatibility                                         | Medium    |
| 5                                              | 2.02 | What is the quality of the climate matching data?                                                                                                                       | Medium                                              | Climach used, Worldclim sample available points - 23 target points selected.                                                                                                                                                                  | High      |
| 6                                              | 2.03 | Is the taxon already present outside of captivity in the RA area?                                                                                                       | No                                                  | Horizon species                                                                                                                                                                                                                               | Very high |
| 7                                              | 2.04 | How many potential vectors could the taxon use to enter in the RA area?                                                                                                 | One                                                 | Intentional - aquaculture                                                                                                                                                                                                                     | High      |
| 8                                              | 2.05 | Is the taxon currently found in close proximity to, and likely to enter into, the RA area in the near future (e.g. unintentional and intentional introductions)?        | No                                                  | In 1986 <i>S.salar</i> was experimentally aquacultured. not succesful.                                                                                                                                                                        | Very high |
| 3. Invasive elsewhere                          |      |                                                                                                                                                                         |                                                     |                                                                                                                                                                                                                                               |           |
| 9                                              | 3.01 | Has the taxon become naturalised (established viable populations) outside its native range?                                                                             | Yes                                                 | Kottelat, M. and J. Freyhof, 2007. Handbook of European freshwater fishes. Publications Kottelat, Cornol and Freyhof, Berlin. 646 pp.                                                                                                         | Very high |
| 10                                             | 3.02 | In the taxon's introduced range, are there known adverse impacts to wild stocks or commercial taxa?                                                                     | Yes                                                 | The contribution of Atlantic salmon ( <i>Salmo salar</i> L.) enhancement to a sustainable resource. 1997 J. A. Ritter                                                                                                                         | Very high |
| 11                                             | 3.03 | In the taxon's introduced range, are there known adverse impacts to aquaculture?                                                                                        | No                                                  | no, it is rather contra. One species with two biologies: Atlantic salmon ( <i>Salmo salar</i> ) in the wild and in aquaculture 1998 Mart R.                                                                                                   | High      |
| 12                                             | 3.04 | In the taxon's introduced range, are there known adverse impacts to ecosystem services?                                                                                 | Yes                                                 | Environmental issues in Chilean salmon farming: a reviewRenato A. Quiñones1,2, Marcelo Fuentes2, Rodrigo M. Montes1, Doris Soto1and Jorge León-Muñoz. 2019.                                                                                   | High      |
| 13                                             | 3.05 | In the taxon's introduced range, are there known adverse socio-economic impacts?                                                                                        | No                                                  | Environmental issues in Chilean salmon farming: a reviewRenato A. Quiñones1,2, Marcelo Fuentes2, Rodrigo M. Montes1, Doris Soto1and Jorge León-Muñoz. 2019                                                                                    | High      |
| B. Biology/Ecology                             |      |                                                                                                                                                                         |                                                     |                                                                                                                                                                                                                                               |           |
| 4. Undesirable (or persistence) traits         |      |                                                                                                                                                                         |                                                     |                                                                                                                                                                                                                                               |           |
| 14                                             | 4.01 | Is it likely that the taxon will be poisonous or pose other risks to human health?                                                                                      | No                                                  | Kottelat, M. and J. Freyhof, 2007. Handbook of European freshwater fishes. Publications Kottelat, Cornol and Freyhof, Berlin. 646 pp.                                                                                                         | Very high |
| 15                                             | 4.02 | Is it likely that the taxon will smother one or more native taxa (that are not threatened or protected)?                                                                | No                                                  | Incidence and impacts of escaped farmed Atlantic salmon <i>Salmo salar</i> in nature Eva B. Thorstad, Ian A. Fleming, Philip McGinnity, Doris Soto, Vidar Wennevik & Fred Whoriskey. 2008.                                                    | High      |
| 16                                             | 4.03 | Are there any threatened or protected taxa that the non-native taxon would parasitise in the RA area?                                                                   | No                                                  | Not a parasite.                                                                                                                                                                                                                               | Very high |
| 17                                             | 4.04 | Is the taxon adaptable in terms of climatic and other environmental conditions, thus enhancing its potential persistence if it has invaded or could invade the RA area? | No                                                  | Kottelat, M. and J. Freyhof, 2007. Handbook of European freshwater fishes. Publications Kottelat, Cornol and Freyhof, Berlin. 646 pp.                                                                                                         | High      |
| 18                                             | 4.05 | Is the taxon likely to disrupt food-web structure/function in aquatic ecosystems if it has invaded or is likely to invade the RA area?                                  | No                                                  | Incidence and impacts of escaped farmed Atlantic salmon <i>Salmo salar</i> in nature Eva B. Thorstad, Ian A. Fleming, Philip McGinnity, Doris Soto, Vidar Wennevik & Fred Whoriskey. 2008.                                                    | High      |
| 19                                             | 4.06 | Is the taxon likely to exert adverse impacts on ecosystem services in the RA area?                                                                                      | Yes                                                 | The contribution of Atlantic salmon ( <i>Salmo salar</i> L.) enhancement to a sustainable resource. 1997. J. A. Ritter                                                                                                                        | High      |
| 20                                             | 4.07 | Is it likely that the taxon will host, and/or act as a vector for, recognised pests and infectious agents that are endemic in the RA area?                              | Yes                                                 | Ecology of Atlantic Salmon and Brown Trout. jonsson and jonsson. 2011                                                                                                                                                                         | Medium    |
| 21                                             | 4.08 | Is it likely that the taxon will host, and/or act as a vector for, recognised pests and infectious agents that are absent from (novel to) the RA area?                  | Yes                                                 | Ecology of Atlantic Salmon and Brown Trout. jonsson and jonsson. 2011                                                                                                                                                                         | Very high |
| 22                                             | 4.09 | Is it likely that the taxon will achieve a body size that will make it more likely to be released from captivity?                                                       | Yes                                                 | Kottelat, M. and J. Freyhof, 2007. Handbook of European freshwater fishes. Publications Kottelat, Cornol and Freyhof, Berlin. 646 pp.                                                                                                         | High      |
| 23                                             | 4.10 | Is the taxon capable of sustaining itself in a range of water velocity conditions (e.g. versatile in habitat use)?                                                      | Yes                                                 | Stream channel experiments on downstream movement of recently emerged trout, <i>Salmo trutta</i> L. and salmon, <i>S. salar</i> L.—I. Effect of four different water velocity treatments upon dispersal rate. D. T. Crisp M. A. Hurley. 1991. | High      |
| 24                                             | 4.11 | Is it likely that the taxon's mode of existence (e.g. excretion of by-products) or behaviours (e.g. feeding) will reduce habitat quality for native taxa?               | No                                                  | Kottelat, M. and J. Freyhof, 2007. Handbook of European freshwater fishes. Publications Kottelat, Cornol and Freyhof, Berlin. 646 pp.                                                                                                         | High      |

|                                 |      |                                                                                                                                                                              |          |                                                                                                                                                                                                                                                                                                                                                                                     |           |
|---------------------------------|------|------------------------------------------------------------------------------------------------------------------------------------------------------------------------------|----------|-------------------------------------------------------------------------------------------------------------------------------------------------------------------------------------------------------------------------------------------------------------------------------------------------------------------------------------------------------------------------------------|-----------|
| 25                              | 4.12 | Is the taxon likely to maintain a viable population even when present in low densities (or persisting in adverse conditions by way of a dormant form)?                       | No       | Incidence and impacts of escaped farmed Atlantic salmon <i>Salmo salar</i> in nature Eva B. Thorstad, Ian A. Fleming, Philip McGinnity, Doris Soto, Vidar Wennevik & Fred Whoriskey. 2008.                                                                                                                                                                                          | Very high |
| <b>5. Resource exploitation</b> |      |                                                                                                                                                                              |          |                                                                                                                                                                                                                                                                                                                                                                                     |           |
| 26                              | 5.01 | Is the taxon likely to consume threatened or protected native taxa in the RA area?                                                                                           | Yes      | Kottelat, M. and J. Freyhof, 2007. Handbook of European freshwater fishes. Publications Kottelat, Cornol and Freyhof,                                                                                                                                                                                                                                                               | High      |
| 27                              | 5.02 | Is the taxon likely to sequester food resources (including nutrients) to the detriment of native taxa in the RA area?                                                        | Yes      | Incidence and impacts of escaped farmed Atlantic salmon <i>Salmo salar</i> in nature Eva B. Thorstad, Ian A. Fleming, Philip McGinnity, Doris Soto, Vidar Wennevik & Fred Whoriskey. 2008. at juvenile                                                                                                                                                                              | High      |
| <b>6. Reproduction</b>          |      |                                                                                                                                                                              |          |                                                                                                                                                                                                                                                                                                                                                                                     |           |
| 28                              | 6.01 | Is the taxon likely to exhibit parental care and/or to reduce age-at-maturity in response to environmental conditions?                                                       | Yes      | Life history variation and growth rate thresholds for maturity in Atlantic salmon, <i>Salmo salar</i> . Jeffrey A. Hutchings and Megan E.B. Jones. 1997. Ecology of Atlantic Salmon and Brown Trout. jonsson and jonsson. 2011                                                                                                                                                      | Very high |
| 29                              | 6.02 | Is the taxon likely to produce viable gametes or propagules (in the RA area)?                                                                                                | Yes      | There is climate overlap so probably yes.                                                                                                                                                                                                                                                                                                                                           | High      |
| 30                              | 6.03 | Is the taxon likely to hybridise naturally with native taxa?                                                                                                                 | Yes      | Kottelat, M. and J. Freyhof, 2007. Handbook of European freshwater fishes. Publications Kottelat, Cornol and Freyhof,                                                                                                                                                                                                                                                               | Very high |
| 31                              | 6.04 | Is the taxon likely to be hermaphroditic or to display asexual reproduction?                                                                                                 | No       | Kottelat, M. and J. Freyhof, 2007. Handbook of European freshwater fishes. Publications Kottelat, Cornol and Freyhof,                                                                                                                                                                                                                                                               | High      |
| 32                              | 6.05 | Is the taxon dependent on the presence of another taxon (or specific habitat features) to complete its life cycle?                                                           | No       | Kottelat, M. and J. Freyhof, 2007. Handbook of European freshwater fishes. Publications Kottelat, Cornol and Freyhof, Berlin. 646 pp.                                                                                                                                                                                                                                               | Very high |
| 33                              | 6.06 | Is the taxon known (or likely) to produce a large number of propagules or offspring within a short time span (e.g. < 1 year)?                                                | Yes      | Ecology of Atlantic Salmon and Brown Trout. jonsson and jonsson. 2011                                                                                                                                                                                                                                                                                                               | Very high |
| 34                              | 6.07 | How many time units (days, months, years) does the taxon require to reach the age-at-first-reproduction?                                                                     | 2        | Life history variation and growth rate thresholds for maturity in Atlantic salmon, <i>Salmo salar</i> . Jeffrey A. Hutchings and Megan E.B. Jones. 1998                                                                                                                                                                                                                             | High      |
| <b>7. Dispersal mechanisms</b>  |      |                                                                                                                                                                              |          |                                                                                                                                                                                                                                                                                                                                                                                     |           |
| 35                              | 7.01 | How many potential internal vectors/pathways could the taxon use to disperse within the RA area (with suitable)                                                              | >1       | Intentional stocking and unintentional escape from fish farms                                                                                                                                                                                                                                                                                                                       | High      |
| 36                              | 7.02 | Will any of these vectors/pathways bring the taxon in close proximity to one or more protected areas (e.g. MCZ, MPA, SSSI)?                                                  | Yes      | Probably, <i>S. salar</i> is anadromous fish.                                                                                                                                                                                                                                                                                                                                       | Medium    |
| 37                              | 7.03 | Does the taxon have a means of actively attaching itself to hard substrata (e.g. ship hulls, pilings, buoys) such that it enhances the likelihood of dispersal?              | No       | No such structures.                                                                                                                                                                                                                                                                                                                                                                 | Very high |
| 38                              | 7.04 | Is natural dispersal of the taxon likely to occur as eggs (for animals) or as propagules (for plants: seeds, spores) in the RA area?                                         | No       | Kottelat, M. and J. Freyhof, 2007. Handbook of European freshwater fishes. Publications Kottelat, Cornol and Freyhof, Berlin. 646 pp.                                                                                                                                                                                                                                               | High      |
| 39                              | 7.05 | Is natural dispersal of the taxon likely to occur as larvae/juveniles (for animals) or as fragments/seedlings (for plants) in the RA area?                                   | Yes      | Stream channel experiments on downstream movement of recently emerged trout, <i>Salmo trutta</i> L. and salmon, <i>S. salar</i> L.—I. Effect of four different water velocity treatments upon dispersal rate. D. T. Crisp M. A. Hurley. 1991.                                                                                                                                       | High      |
| 40                              | 7.06 | Are older life stages of the taxon likely to migrate in the RA area for reproduction?                                                                                        | Yes      | Stream channel experiments on downstream movement of recently emerged trout, <i>Salmo trutta</i> L. and salmon, <i>S. salar</i> L.—I. Effect of four different water velocity treatments upon dispersal rate. D. T. Crisp M. A. Hurley. 1991. Kottelat, M. and J. Freyhof, 2007. Handbook of European freshwater fishes. Publications Kottelat, Cornol and Freyhof, Berlin. 646 pp. | High      |
| 41                              | 7.07 | Are propagules or eggs of the taxon likely to be dispersed in the RA area by other animals?                                                                                  | No       | More likely to be eaten.                                                                                                                                                                                                                                                                                                                                                            | High      |
| 42                              | 7.08 | Is dispersal of the taxon along any of the vectors/pathways mentioned in the previous seven questions (35–41; i.e. both unintentional or intentional) likely to be           | Yes      | Intentional and unintentional.                                                                                                                                                                                                                                                                                                                                                      | High      |
| 43                              | 7.09 | Is dispersal of the taxon density dependent?                                                                                                                                 | Yes      | Ecology of Atlantic Salmon and Brown Trout. jonsson and jonsson. 2011                                                                                                                                                                                                                                                                                                               | High      |
| <b>8. Tolerance attributes</b>  |      |                                                                                                                                                                              |          |                                                                                                                                                                                                                                                                                                                                                                                     |           |
| 44                              | 8.01 | Is the taxon able to withstand being out of water for extended periods (e.g. minimum of one or more hours) at some stage of its life cycle?                                  | No       | Very sensitive to reduced oxygen levels. Kottelat, M. and J. Freyhof, 2007. Handbook of European freshwater fishes. Publications Kottelat, Cornol and Freyhof, Berlin. 646 pp.                                                                                                                                                                                                      | High      |
| 45                              | 8.02 | Is the taxon tolerant of a wide range of water quality conditions relevant to that taxon? [In the Justification field, indicate the relevant water quality variable(s) being | No       | Kottelat, M. and J. Freyhof, 2007. Handbook of European freshwater fishes. Publications Kottelat, Cornol and Freyhof, Berlin. 646 pp.                                                                                                                                                                                                                                               | Very high |
| 46                              | 8.03 | Can the taxon be controlled or eradicated in the wild with chemical, biological, or other agents/means?                                                                      | No       | There is no selective ichtiocid. Kottelat, M. and J. Freyhof, 2007. Handbook of European freshwater fishes. Publications Kottelat, Cornol and Freyhof, Berlin. 646 pp.                                                                                                                                                                                                              | Very high |
| 47                              | 8.04 | Is the taxon likely to tolerate or benefit from environmental/human disturbance?                                                                                             | No       | Kottelat, M. and J. Freyhof, 2007. Handbook of European freshwater fishes. Publications Kottelat, Cornol and Freyhof,                                                                                                                                                                                                                                                               | High      |
| 48                              | 8.05 | Is the taxon able to tolerate salinity levels that are higher or lower than those found in its usual environment?                                                            | Yes      | Anadromous species. Kottelat, M. and J. Freyhof, 2007. Handbook of European freshwater fishes. Publications Kottelat, Cornol and Freyhof, Berlin. 646 pp.                                                                                                                                                                                                                           | High      |
| 49                              | 8.06 | Are there effective natural enemies (predators) of the taxon present in the RA area?                                                                                         | Yes      | Probably egg eaters and some mammals. Kottelat, M. and J. Freyhof, 2007. Handbook of European freshwater fishes. Publications Kottelat, Cornol and Freyhof, Berlin. 646 pp.                                                                                                                                                                                                         | Very high |
| <b>C. Climate change</b>        |      |                                                                                                                                                                              |          |                                                                                                                                                                                                                                                                                                                                                                                     |           |
| <b>9. Climate change</b>        |      |                                                                                                                                                                              |          |                                                                                                                                                                                                                                                                                                                                                                                     |           |
| 50                              | 9.01 | Under the predicted future climatic conditions, are the risks of entry into the RA area posed by the taxon likely to increase, decrease or not change?                       | Decrease | Ecology of Atlantic Salmon and Brown Trout. jonsson and jonsson. 2011                                                                                                                                                                                                                                                                                                               | Medium    |

|    |      |                                                                                                                                                              |           |                                                                       |        |
|----|------|--------------------------------------------------------------------------------------------------------------------------------------------------------------|-----------|-----------------------------------------------------------------------|--------|
| 51 | 9.02 | Under the predicted future climatic conditions, are the risks of establishment posed by the taxon likely to increase, decrease or not change?                | No change | Ecology of Atlantic Salmon and Brown Trout. jonsson and jonsson. 2011 | High   |
| 52 | 9.03 | Under the predicted future climatic conditions, are the risks of dispersal within the RA area posed by the taxon likely to increase, decrease or not change? | No change | Ecology of Atlantic Salmon and Brown Trout. jonsson and jonsson. 2011 | Medium |
| 53 | 9.04 | Under the predicted future climatic conditions, what is the likely magnitude of future potential impacts on biodiversity and/or ecological integrity/status? | No change | Ecology of Atlantic Salmon and Brown Trout. jonsson and jonsson. 2011 | High   |
| 54 | 9.05 | Under the predicted future climatic conditions, what is the likely magnitude of future potential impacts on ecosystem structure and/or function?             | No change | Ecology of Atlantic Salmon and Brown Trout. jonsson and jonsson. 2011 | High   |
| 55 | 9.06 | Under the predicted future climatic conditions, what is the likely magnitude of future potential impacts on ecosystem services/socio-economic factors?       | No change | Ecology of Atlantic Salmon and Brown Trout. jonsson and jonsson. 2011 | High   |

| Statistics                                     |             |
|------------------------------------------------|-------------|
| Scores                                         |             |
| <b>BRA</b>                                     | <b>28.5</b> |
| <b>BRA Outcome</b>                             | <b>-</b>    |
| <b>BRA+CCA</b>                                 | <b>26.5</b> |
| <b>BRA+CCA Outcome</b>                         | <b>-</b>    |
| Score partition                                |             |
| <b>A. Biogeography/Historical</b>              | <b>11.5</b> |
| 1. Domestication/Cultivation                   | 4.0         |
| 2. Climate, distribution and introduction risk | 0.0         |
| 3. Invasive elsewhere                          | 7.5         |
| <b>B. Biology/Ecology</b>                      | <b>17.0</b> |
| 4. Undesirable (or persistence) traits         | 4.0         |
| 5. Resource exploitation                       | 7.0         |
| 6. Reproduction                                | 4.0         |
| 7. Dispersal mechanisms                        | 3.0         |
| 8. Tolerance attributes                        | -1.0        |
| <b>C. Climate change</b>                       | <b>-2.0</b> |
| 9. Climate change                              | -2.0        |
| Answered Questions                             |             |
| <b>Total</b>                                   | <b>55</b>   |
| <b>A. Biogeography/Historical</b>              | <b>13</b>   |
| 1. Domestication/Cultivation                   | 3           |
| 2. Climate, distribution and introduction risk | 5           |
| 3. Invasive elsewhere                          | 5           |
| <b>B. Biology/Ecology</b>                      | <b>36</b>   |
| 4. Undesirable (or persistence) traits         | 12          |
| 5. Resource exploitation                       | 2           |
| 6. Reproduction                                | 7           |
| 7. Dispersal mechanisms                        | 9           |
| 8. Tolerance attributes                        | 6           |
| <b>C. Climate change</b>                       | <b>6</b>    |
| 9. Climate change                              | 6           |
| Sectors affected                               |             |
| <b>Commercial</b>                              | <b>8</b>    |
| <b>Environmental</b>                           | <b>10</b>   |
| <b>Species or population nuisance traits</b>   | <b>12</b>   |

| Thresholds     |             |
|----------------|-------------|
| <b>BRA</b>     | <b>-</b>    |
| <b>BRA+CCA</b> | <b>-</b>    |
| Confidence     |             |
| <b>BRA+CCA</b> | <b>0.81</b> |
| <b>BRA</b>     | <b>0.83</b> |
| <b>CCA</b>     | <b>0.67</b> |

| Date and Time       |  |
|---------------------|--|
| 13/05/2021 15:00:53 |  |

AS-ISK v2

| Taxon and Assessor details         |                                         |
|------------------------------------|-----------------------------------------|
| Category                           | Fishes and Lampreys (freshwater)        |
| Taxon name                         | <i>Salmo salar</i>                      |
| Common name                        | Atlantic salmon                         |
| Assessor                           | Ivan Špelić                             |
| Risk screening context             |                                         |
| Reason and socio-economic benefits |                                         |
| Risk assessment area               | Danube & Adriatic basins BA, HR, ME, RS |
| Taxonomy                           |                                         |
| Native range                       |                                         |
| Introduced range                   |                                         |
| URL                                |                                         |

|                                                |      |                                                                                                                                                                  | Response       | Justification (references and/or other information)                                                                                                                                                                                                                                                                                                                                                                                                                                                    | Confidence |
|------------------------------------------------|------|------------------------------------------------------------------------------------------------------------------------------------------------------------------|----------------|--------------------------------------------------------------------------------------------------------------------------------------------------------------------------------------------------------------------------------------------------------------------------------------------------------------------------------------------------------------------------------------------------------------------------------------------------------------------------------------------------------|------------|
| A. Biogeography/Historical                     |      |                                                                                                                                                                  |                |                                                                                                                                                                                                                                                                                                                                                                                                                                                                                                        |            |
| 1. Domestication/Cultivation                   |      |                                                                                                                                                                  |                |                                                                                                                                                                                                                                                                                                                                                                                                                                                                                                        |            |
| 1                                              | 1.01 | Has the taxon been the subject of domestication (or cultivation) for at least 20 generations?                                                                    | Yes            | Cultured Aquatic Species Information Programme. <i>Salmo salar</i> . Cultured Aquatic Species Information Programme. Text by Jones, M. In: FAO Fisheries Division [online]. Rome. Updated . [Cited 19 May 2021].                                                                                                                                                                                                                                                                                       | Very high  |
| 2                                              | 1.02 | Is the taxon harvested in the wild and likely to be sold or used in its live form?                                                                               | No             | Wild salmon is harvested for consumption (Liu, Y., Olaf Olausen, J., & Skonhøft, A. (2011). Wild and farmed salmon in Norway—A review. <i>Marine Policy</i> , 35(3), 413–418. doi:10.1016/j.marpol.2010.11.007 ), broodstock in aquaculture are selected from already farmed stock (Cultured Aquatic Species Information Programme. <i>Salmo salar</i> . Cultured Aquatic Species Information Programme. Text by Jones, M. In: FAO Fisheries Division [online]. Rome. Updated . [Cited 19 May 2021].). | Medium     |
| 3                                              | 1.03 | Does the taxon have invasive races, varieties, sub-taxa or congeners?                                                                                            | Yes            | <i>Salmo trutta</i> (CABI).                                                                                                                                                                                                                                                                                                                                                                                                                                                                            | Very high  |
| 2. Climate, distribution and introduction risk |      |                                                                                                                                                                  |                |                                                                                                                                                                                                                                                                                                                                                                                                                                                                                                        |            |
| 4                                              | 2.01 | How similar are the climatic conditions of the Risk Assessment (RA) area and the taxon's native range?                                                           | Medium         | Climatch, using methodology in <a href="https://dpiwwe.tas.gov.au/Documents/Risk%20assessment%20methodology_wildlife%20imports%20August%202017.pdf">https://dpiwwe.tas.gov.au/Documents/Risk%20assessment%20methodology_wildlife%20imports%20August%202017.pdf</a>                                                                                                                                                                                                                                     | Medium     |
| 5                                              | 2.02 | What is the quality of the climate matching data?                                                                                                                | Medium         | Climatch                                                                                                                                                                                                                                                                                                                                                                                                                                                                                               | High       |
| 6                                              | 2.03 | Is the taxon already present outside of captivity in the RA area?                                                                                                | Yes            | Drava in Croatia (Piria, M., Simonović, P., Kalogianni, E., Vardakas, L., Koutsikos, N., Zanella, D., Ristovska, M., Apostolou, Apostolos, Adrović, Avdul, Mrdak, D. & Tarkan. Ali Serhan et al. (2018) Alien freshwater fish species in the Balkans— Vectors and pathways of introduction. <i>Fish and fisheries</i> , 19, 138-169.) but <u>unconfirmed in recent times</u> .                                                                                                                         | Low        |
| 7                                              | 2.04 | How many potential vectors could the taxon use to enter in the RA area?                                                                                          | Not applicable | Already listed as present in Croatia, but a while ago and not recently confirmed (Piria, M., Simonović, P., Kalogianni, E., Vardakas, L., Koutsikos, N., Zanella, D., Ristovska, M., Apostolou, Apostolos, Adrović, Avdul, Mrdak, D. & Tarkan. Ali Serhan et al. (2018) Alien freshwater fish species in the Balkans— Vectors and pathways of introduction. <i>Fish and fisheries</i> , 19, 138-169.).                                                                                                 | Low        |
| 8                                              | 2.05 | Is the taxon currently found in close proximity to, and likely to enter into, the RA area in the near future (e.g. unintentional and intentional introductions)? | Not applicable | Already listed as present in Croatia, but a while ago and not recently confirmed (Piria, M., Simonović, P., Kalogianni, E., Vardakas, L., Koutsikos, N., Zanella, D., Ristovska, M., Apostolou, Apostolos, Adrović, Avdul, Mrdak, D. & Tarkan. Ali Serhan et al. (2018) Alien freshwater fish species in the Balkans— Vectors and pathways of introduction. <i>Fish and fisheries</i> , 19, 138-169.).                                                                                                 | Low        |
| 3. Invasive elsewhere                          |      |                                                                                                                                                                  |                |                                                                                                                                                                                                                                                                                                                                                                                                                                                                                                        |            |
| 9                                              | 3.01 | Has the taxon become naturalised (established viable populations) outside its native range?                                                                      | Yes            | CABI, Fuller, P., M. Neilson, K. Dettloff, A. Fusaro, and R. Sturtevant, 2021, <i>Salmo salar</i> Linnaeus, 1758: U.S. Geological Survey, Nonindigenous Aquatic Species Database, Gainesville, FL, <a href="https://nas.er.usgs.gov/queries/factsheet.aspx?SpeciesID=926">https://nas.er.usgs.gov/queries/factsheet.aspx?SpeciesID=926</a> , Revision Date: 9/12/2019, Peer Review Date: 1/26/2016, Access Date: 5/19/2021                                                                             | High       |
| 10                                             | 3.02 | In the taxon's introduced range, are there known adverse impacts to wild stocks or commercial taxa?                                                              | Yes            | Fuller, P., M. Neilson, K. Dettloff, A. Fusaro, and R. Sturtevant, 2021, <i>Salmo salar</i> Linnaeus, 1758: U.S. Geological Survey, Nonindigenous Aquatic Species Database, Gainesville, FL, <a href="https://nas.er.usgs.gov/queries/factsheet.aspx?SpeciesID=926">https://nas.er.usgs.gov/queries/factsheet.aspx?SpeciesID=926</a> , Revision Date: 9/12/2019, Peer Review Date: 1/26/2016, Access Date: 5/19/2021                                                                                   | High       |
| 11                                             | 3.03 | In the taxon's introduced range, are there known adverse impacts to aquaculture?                                                                                 | Yes            | Fuller, P., M. Neilson, K. Dettloff, A. Fusaro, and R. Sturtevant, 2021, <i>Salmo salar</i> Linnaeus, 1758: U.S. Geological Survey, Nonindigenous Aquatic Species Database, Gainesville, FL, <a href="https://nas.er.usgs.gov/queries/factsheet.aspx?SpeciesID=926">https://nas.er.usgs.gov/queries/factsheet.aspx?SpeciesID=926</a> , Revision Date: 9/12/2019, Peer Review Date: 1/26/2016, Access Date: 5/19/2021                                                                                   | High       |
| 12                                             | 3.04 | In the taxon's introduced range, are there known adverse impacts to ecosystem services?                                                                          | No             | Positive economic/livelihood impact (CABI, 2021. <i>Salmo salar</i> [original text by Sunil Siriwardena]. In: <i>Invasive Species Compendium</i> . Wallingford, UK: CAB International.                                                                                                                                                                                                                                                                                                                 | Medium     |
| 13                                             | 3.05 | In the taxon's introduced range, are there known adverse socio-economic impacts?                                                                                 | No             | Positive economic/livelihood impact (CABI, 2021. <i>Salmo salar</i> [original text by Sunil Siriwardena]. In: <i>Invasive Species Compendium</i> . Wallingford, UK: CAB International.                                                                                                                                                                                                                                                                                                                 | Medium     |
| B. Biology/Ecology                             |      |                                                                                                                                                                  |                |                                                                                                                                                                                                                                                                                                                                                                                                                                                                                                        |            |
| 4. Undesirable (or persistence) traits         |      |                                                                                                                                                                  |                |                                                                                                                                                                                                                                                                                                                                                                                                                                                                                                        |            |
| 14                                             | 4.01 | Is it likely that the taxon will be poisonous or pose other risks to human health?                                                                               | No             | Harmless (Luna, Susan M. in Froese, R. and D. Pauly. Editors. 2021.FishBase. World Wide Web electronic publication. <a href="http://www.fishbase.org">www.fishbase.org</a> , ( 02/2021 )).                                                                                                                                                                                                                                                                                                             | Very high  |

|                                 |      |                                                                                                                                                                         |                |                                                                                                                                                                                                                                                                                                                                                                                                                                                                                                                                                               |           |
|---------------------------------|------|-------------------------------------------------------------------------------------------------------------------------------------------------------------------------|----------------|---------------------------------------------------------------------------------------------------------------------------------------------------------------------------------------------------------------------------------------------------------------------------------------------------------------------------------------------------------------------------------------------------------------------------------------------------------------------------------------------------------------------------------------------------------------|-----------|
| 15                              | 4.02 | Is it likely that the taxon will smother one or more native taxa (that are not threatened or protected)?                                                                | No             | There was documented competition between salmon and both steelhead trout and rainbow trout (Fuller, P., M. Neilson, K. Dettloff, A. Fusaro, and R. Sturtevant, 2021, <i>Salmo salar</i> Linnaeus, 1758: U.S. Geological Survey, Nonindigenous Aquatic Species Database, Gainesville, FL, <a href="https://nas.er.usgs.gov/queries/factsheet.aspx?SpeciesID=926">https://nas.er.usgs.gov/queries/factsheet.aspx?SpeciesID=926</a> , Revision Date: 9/12/2019, Peer Review Date: 1/26/2016, Access Date: 5/19/2021) but not with native species of the RA area. | Low       |
| 16                              | 4.03 | Are there any threatened or protected taxa that the non-native taxon would parasitise in the RA area?                                                                   | No             | No parasitic behaviour.                                                                                                                                                                                                                                                                                                                                                                                                                                                                                                                                       | Very high |
| 17                              | 4.04 | Is the taxon adaptable in terms of climatic and other environmental conditions, thus enhancing its potential persistence if it has invaded or could invade the RA area? | No             | Temperate; 2°C - 9°C; found in rivers where temperature rises above 10° C for about 3 months per year and does not exceed 20° C for more than a few weeks in summer (preferred temperatures 4-12°C) (Luna, Susan M. in Froese, R. and D. Pauly. Editors. 2021.FishBase. World Wide Web electronic publication. <a href="http://www.fishbase.org">www.fishbase.org</a> , ( 02/2021 )).                                                                                                                                                                         | Very high |
| 18                              | 4.05 | Is the taxon likely to disrupt food-web structure/function in aquatic ecosystems if it has invaded or is likely to invade the RA area?                                  | No             | No evidence for similar impacts.                                                                                                                                                                                                                                                                                                                                                                                                                                                                                                                              | Medium    |
| 19                              | 4.06 | Is the taxon likely to exert adverse impacts on ecosystem services in the RA area?                                                                                      | No             | No documented adverse impacts in any area ((CABI, 2021. <i>Salmo salar</i> [original text by Sunil Siriwardena]. In: Invasive Species Compendium. Wallingford, UK: CAB International. <a href="http://www.cabi.org/isc">www.cabi.org/isc</a> )).                                                                                                                                                                                                                                                                                                              | High      |
| 20                              | 4.07 | Is it likely that the taxon will host, and/or act as a vector for, recognised pests and infectious agents that are endemic in the RA area?                              | Yes            | Susceptible to pathogens and parasites (Global Invasive Species Database (2021) Species profile: <i>Salmo salar</i> . Downloaded from <a href="http://www.iucnqisd.org/qisd/species.php?sc=376">http://www.iucnqisd.org/qisd/species.php?sc=376</a> on 21-05-2021.; CABI, 2021. <i>Salmo salar</i> [original text by Sunil Siriwardena]. In: Invasive Species Compendium. Wallingford, UK: CAB International. <a href="http://www.cabi.org/isc">www.cabi.org/isc</a> )).                                                                                      | Very high |
| 21                              | 4.08 | Is it likely that the taxon will host, and/or act as a vector for, recognised pests and infectious agents that are absent from (novel to) the RA area?                  | Yes            | Susceptible to pathogens and parasites (Global Invasive Species Database (2021) Species profile: <i>Salmo salar</i> . Downloaded from <a href="http://www.iucnqisd.org/qisd/species.php?sc=376">http://www.iucnqisd.org/qisd/species.php?sc=376</a> on 21-05-2021.; CABI, 2021. <i>Salmo salar</i> [original text by Sunil Siriwardena]. In: Invasive Species Compendium. Wallingford, UK: CAB International. <a href="http://www.cabi.org/isc">www.cabi.org/isc</a> )).                                                                                      | Very high |
| 22                              | 4.09 | Is it likely that the taxon will achieve a body size that will make it more likely to be released from captivity?                                                       | Yes            | 150 cm, 46.8 kg (Luna, Susan M. in Froese, R. and D. Pauly. Editors. 2021.FishBase. World Wide Web electronic publication. <a href="http://www.fishbase.org">www.fishbase.org</a> , ( 02/2021 )).                                                                                                                                                                                                                                                                                                                                                             | Very high |
| 23                              | 4.10 | Is the taxon capable of sustaining itself in a range of water velocity conditions (e.g. versatile in habitat use)?                                                      | Yes            | Lacustrine (landlocked) and riverine populations (Luna, Susan M. in Froese, R. and D. Pauly. Editors. 2021.FishBase. World Wide Web electronic publication. <a href="http://www.fishbase.org">www.fishbase.org</a> , ( 02/2021 )).                                                                                                                                                                                                                                                                                                                            | Very high |
| 24                              | 4.11 | Is it likely that the taxon's mode of existence (e.g. excretion of by-products) or behaviours (e.g. feeding) will reduce habitat quality for native taxa?               | No             | Possible for this species in aquaculture but not documented for introductions in the wild (Global Invasive Species Database (2021) Species profile: <i>Salmo salar</i> . Downloaded from <a href="http://www.iucnqisd.org/qisd/species.php?sc=376">http://www.iucnqisd.org/qisd/species.php?sc=376</a> on 21-05-                                                                                                                                                                                                                                              | High      |
| 25                              | 4.12 | Is the taxon likely to maintain a viable population even when present in low densities (or persisting in adverse conditions by way of a dormant form)?                  | No             | Not documented.                                                                                                                                                                                                                                                                                                                                                                                                                                                                                                                                               | Low       |
| <b>5. Resource exploitation</b> |      |                                                                                                                                                                         |                |                                                                                                                                                                                                                                                                                                                                                                                                                                                                                                                                                               |           |
| 26                              | 5.01 | Is the taxon likely to consume threatened or protected native taxa in the RA area?                                                                                      | Yes            | Juveniles feed mainly on aquatic insects, mollusks, crustaceans and fish; adults at sea feed on squids, shrimps, and fish (Luna, Susan M. in Froese, R. and D. Pauly. Editors. 2021.FishBase. World Wide Web electronic publication. <a href="http://www.fishbase.org">www.fishbase.org</a> , ( 02/2021 )).                                                                                                                                                                                                                                                   | High      |
| 27                              | 5.02 | Is the taxon likely to sequester food resources (including nutrients) to the detriment of native taxa in the RA area?                                                   | Not applicable | No data.                                                                                                                                                                                                                                                                                                                                                                                                                                                                                                                                                      | Very high |
| <b>6. Reproduction</b>          |      |                                                                                                                                                                         |                |                                                                                                                                                                                                                                                                                                                                                                                                                                                                                                                                                               |           |
| 28                              | 6.01 | Is the taxon likely to exhibit parental care and/or to reduce age-at-maturity in response to environmental conditions?                                                  | No             | Renzi, V. 1999. " <i>Salmo salar</i> " (On-line), Animal Diversity Web. Accessed May 21, 2021 at <a href="https://animaldiversity.org/accounts/Salmo_salar/">https://animaldiversity.org/accounts/Salmo_salar/</a>                                                                                                                                                                                                                                                                                                                                            | High      |
| 29                              | 6.02 | Is the taxon likely to produce viable gametes or propagules (in the RA area)?                                                                                           | No             | The likelihood of <i>S. salar</i> establishing reproducing populations in introduced habitats is extremely low. Over 130 attempts to introduce Atlantic salmon across 32 states in the United States, over 60 attempts in British Columbia, Canada, several attempts in Tasmania, and numerous attempts in Chile have all failed (Global Invasive Species Database (2021) Species profile: <i>Salmo salar</i> . Downloaded from <a href="http://www.iucnqisd.org/qisd/species.php?sc=376">http://www.iucnqisd.org/qisd/species.php?sc=376</a> on 21-05-       | High      |
| 30                              | 6.03 | Is the taxon likely to hybridise naturally with native taxa?                                                                                                            | No             | Hybridizes with brown trouts but it is very unlikely for <i>S. salar</i> to establish a spawning population in the RA area (Global Invasive Species Database (2021) Species profile: <i>Salmo salar</i> . Downloaded from <a href="http://www.iucnqisd.org/qisd/species.php?sc=376">http://www.iucnqisd.org/qisd/species.php?sc=376</a> on 21-05-                                                                                                                                                                                                             | High      |
| 31                              | 6.04 | Is the taxon likely to be hermaphroditic or to display asexual reproduction?                                                                                            | No             | Not documented in literature.                                                                                                                                                                                                                                                                                                                                                                                                                                                                                                                                 | Very high |
| 32                              | 6.05 | Is the taxon dependent on the presence of another taxon (or specific habitat features) to complete its life cycle?                                                      | Yes            | Spawning migration into freshwater lasts from June to November. Spawns at 6-10°C in gravel river areas far upstream with moderate to fast-flowing, well-oxygenated waters and a succession of riffles and pools. The female selects a site where the gravel is of the right size and of sufficient depth (0.1 to 0.3 m) and water depth is around 0.5-3 m (Luna, Susan M. in Froese, R. and D. Pauly. Editors. 2021.FishBase. World Wide Web electronic publication. <a href="http://www.fishbase.org">www.fishbase.org</a> , ( 02/2021 )).                   | Very high |
| 33                              | 6.06 | Is the taxon known (or likely) to produce a large number of propagules or offspring within a short time span (e.g. < 1 year)?                                           | No             | Not expected to spawn in the RA area (Global Invasive Species Database (2021) Species profile: <i>Salmo salar</i> . Downloaded from <a href="http://www.iucnqisd.org/qisd/species.php?sc=376">http://www.iucnqisd.org/qisd/species.php?sc=376</a> on 21-05-                                                                                                                                                                                                                                                                                                   | High      |
| 34                              | 6.07 | How many time units (days, months, years) does the taxon require to reach the age-at-first-reproduction?                                                                | 3              | Luna, Susan M. in Froese, R. and D. Pauly. Editors. 2021.FishBase. World Wide Web electronic publication. <a href="http://www.fishbase.org">www.fishbase.org</a> , ( 02/2021 )                                                                                                                                                                                                                                                                                                                                                                                | High      |
| <b>7. Dispersal mechanisms</b>  |      |                                                                                                                                                                         |                |                                                                                                                                                                                                                                                                                                                                                                                                                                                                                                                                                               |           |



|                                |      |                                                                                                                                                                              |                |                                                                                                                                                                                                                                                                                                                                                                                                                                                                                                                                                                                                                                             |           |
|--------------------------------|------|------------------------------------------------------------------------------------------------------------------------------------------------------------------------------|----------------|---------------------------------------------------------------------------------------------------------------------------------------------------------------------------------------------------------------------------------------------------------------------------------------------------------------------------------------------------------------------------------------------------------------------------------------------------------------------------------------------------------------------------------------------------------------------------------------------------------------------------------------------|-----------|
| 35                             | 7.01 | How many potential internal vectors/pathways could the taxon use to disperse within the RA area (with suitable)                                                              | >1             | Escape from aquaculture (not yet allowed but in the process), introduction for angling (not likely).                                                                                                                                                                                                                                                                                                                                                                                                                                                                                                                                        | Low       |
| 36                             | 7.02 | Will any of these vectors/pathways bring the taxon in close proximity to one or more protected areas (e.g. MCZ, MPA, SSSI)?                                                  | Yes            | If situated near streams entering protected areas.                                                                                                                                                                                                                                                                                                                                                                                                                                                                                                                                                                                          | Low       |
| 37                             | 7.03 | Does the taxon have a means of actively attaching itself to hard substrata (e.g. ship hulls, pilings, buoys) such that it enhances the likelihood of dispersal?              | No             | No such adaptations.                                                                                                                                                                                                                                                                                                                                                                                                                                                                                                                                                                                                                        | Very high |
| 38                             | 7.04 | Is natural dispersal of the taxon likely to occur as eggs (for animals) or as propagules (for plants: seeds, spores) in the RA area?                                         | No             | Fertilized eggs sink into the redd and are covered with a layer of gravel (0.1-0.3 m) (Luna, Susan M. in Froese, R. and D. Pauly. Editors. 2021.FishBase. World Wide Web electronic publication. <a href="http://www.fishbase.org">www.fishbase.org</a> , (02/2021)).                                                                                                                                                                                                                                                                                                                                                                       | High      |
| 39                             | 7.05 | Is natural dispersal of the taxon likely to occur as larvae/juveniles (for animals) or as fragments/seedlings (for plants) in the RA area?                                   | Yes            | At the southern end of their range, many reach a length of 12-15 cm, transform into smolts and are ready for migration in spring of the first year after hatching (Luna, Susan M. in Froese, R. and D. Pauly. Editors. 2021.FishBase. World Wide Web electronic publication. <a href="http://www.fishbase.org">www.fishbase.org</a> , (02/2021)).                                                                                                                                                                                                                                                                                           | High      |
| 40                             | 7.06 | Are older life stages of the taxon likely to migrate in the RA area for reproduction?                                                                                        | Yes            | Anadromous (Luna, Susan M. in Froese, R. and D. Pauly. Editors. 2021.FishBase. World Wide Web electronic publication. <a href="http://www.fishbase.org">www.fishbase.org</a> , (02/2021)).                                                                                                                                                                                                                                                                                                                                                                                                                                                  | Very high |
| 41                             | 7.07 | Are propagules or eggs of the taxon likely to be dispersed in the RA area by other animals?                                                                                  | No             | Fertilized eggs sink into the redd and are covered with a layer of gravel (0.1-0.3 m) (Luna, Susan M. in Froese, R. and D. Pauly. Editors. 2021.FishBase. World Wide Web electronic publication. <a href="http://www.fishbase.org">www.fishbase.org</a> , (02/2021)).                                                                                                                                                                                                                                                                                                                                                                       | High      |
| 42                             | 7.08 | Is dispersal of the taxon along any of the vectors/pathways mentioned in the previous seven questions (35-41; i.e. both unintentional or intentional) likely to be           | Yes            | Introductions, escapes.                                                                                                                                                                                                                                                                                                                                                                                                                                                                                                                                                                                                                     | Low       |
| 43                             | 7.09 | Is dispersal of the taxon density dependent?                                                                                                                                 | No             | Not documented, migratory species.                                                                                                                                                                                                                                                                                                                                                                                                                                                                                                                                                                                                          | Medium    |
| <b>8. Tolerance attributes</b> |      |                                                                                                                                                                              |                |                                                                                                                                                                                                                                                                                                                                                                                                                                                                                                                                                                                                                                             |           |
| 44                             | 8.01 | Is the taxon able to withstand being out of water for extended periods (e.g. minimum of one or more hours) at some stage of its life cycle?                                  | No             | Not documented, sensitive species.                                                                                                                                                                                                                                                                                                                                                                                                                                                                                                                                                                                                          | Very high |
| 45                             | 8.02 | Is the taxon tolerant of a wide range of water quality conditions relevant to that taxon? [In the Justification field, indicate the relevant water quality variable(s) being | No             | Sensitive to pollution, coldwater species (Renzi, V. 1999. "Salmo salar" (On-line), Animal Diversity Web. Accessed May 21, 2021 at <a href="https://animaldiversity.org/accounts/Salmo_salar/">https://animaldiversity.org/accounts/Salmo_salar/</a> ).                                                                                                                                                                                                                                                                                                                                                                                     | Very high |
| 46                             | 8.03 | Can the taxon be controlled or eradicated in the wild with chemical, biological, or other agents/means?                                                                      | No             | Not allowed.                                                                                                                                                                                                                                                                                                                                                                                                                                                                                                                                                                                                                                | Very high |
| 47                             | 8.04 | Is the taxon likely to tolerate or benefit from environmental/human disturbance?                                                                                             | No             | Habitat destruction, denial of access to spawning grounds by dams and other obstructions are causing declining numbers (Renzi, V. 1999. "Salmo salar" (On-line), Animal Diversity Web. Accessed May 21, 2021 at                                                                                                                                                                                                                                                                                                                                                                                                                             | Very high |
| 48                             | 8.05 | Is the taxon able to tolerate salinity levels that are higher or lower than those found in its usual environment?                                                            | Yes            | Anadromous (Luna, Susan M. in Froese, R. and D. Pauly. Editors. 2021.FishBase. World Wide Web electronic publication. <a href="http://www.fishbase.org">www.fishbase.org</a> , (02/2021)).                                                                                                                                                                                                                                                                                                                                                                                                                                                  | Very high |
| 49                             | 8.06 | Are there effective natural enemies (predators) of the taxon present in the RA                                                                                               | Yes            | Piscivore fish and mammals (CABI).                                                                                                                                                                                                                                                                                                                                                                                                                                                                                                                                                                                                          | High      |
| <b>C. Climate change</b>       |      |                                                                                                                                                                              |                |                                                                                                                                                                                                                                                                                                                                                                                                                                                                                                                                                                                                                                             |           |
| <b>9. Climate change</b>       |      |                                                                                                                                                                              |                |                                                                                                                                                                                                                                                                                                                                                                                                                                                                                                                                                                                                                                             |           |
| 50                             | 9.01 | Under the predicted future climatic conditions, are the risks of entry into the RA area posed by the taxon likely to increase, decrease or not change?                       | Not applicable | Already present (?).                                                                                                                                                                                                                                                                                                                                                                                                                                                                                                                                                                                                                        | Low       |
| 51                             | 9.02 | Under the predicted future climatic conditions, are the risks of establishment posed by the taxon likely to increase, decrease or not change?                                | No change      | The likelihood of <i>S. salar</i> establishing reproducing populations in introduced habitats is extremely low. Over 130 attempts to introduce Atlantic salmon across 32 states in the United States, over 60 attempts in British Columbia, Canada, several attempts in Tasmania, and numerous attempts in Chile have all failed. Most likely not able to establish viable populations even under current conditions (Global Invasive Species Database (2021) Species profile: <i>Salmo salar</i> . Downloaded from <a href="http://www.iucnqisd.org/qisd/species.php?sc=376">http://www.iucnqisd.org/qisd/species.php?sc=376</a> on 21-05- | Medium    |
| 52                             | 9.03 | Under the predicted future climatic conditions, are the risks of dispersal within the RA area posed by the taxon likely to increase, decrease or not change?                 | No change      | Possible dispersal mediated by human, not under influence of climate change.                                                                                                                                                                                                                                                                                                                                                                                                                                                                                                                                                                | Low       |
| 53                             | 9.04 | Under the predicted future climatic conditions, what is the likely magnitude of future potential impacts on biodiversity and/or ecological integrity/status?                 | Lower          | Decreased activity and increased mortality in southern areas of native distribution (Jonsson, B., Jonsson, N., 2009. A review of the likely effects of climate change on anadromous Atlantic salmon <i>Salmo salar</i> and brown trout <i>Salmo trutta</i> , with particular reference to water temperature and flow. Journal of Fish Biology 75, 2381-2447.. doi:10.1111/j.1095-8649.2009.02380.x) so this effects could only be emphasized in RA area if introduced.                                                                                                                                                                      | Medium    |
| 54                             | 9.05 | Under the predicted future climatic conditions, what is the likely magnitude of future potential impacts on ecosystem structure and/or function?                             | Lower          | Decreased activity and increased mortality in southern areas of native distribution (Jonsson, B., Jonsson, N., 2009. A review of the likely effects of climate change on anadromous Atlantic salmon <i>Salmo salar</i> and brown trout <i>Salmo trutta</i> , with particular reference to water temperature and flow. Journal of Fish Biology 75, 2381-2447.. doi:10.1111/j.1095-8649.2009.02380.x) so this effects could only be emphasized in RA area if introduced.                                                                                                                                                                      | Medium    |
| 55                             | 9.06 | Under the predicted future climatic conditions, what is the likely magnitude of future potential impacts on ecosystem services/socio-economic factors?                       | No change      | No likely impacts under current conditions (CABI) so no change expected (personal opinion).                                                                                                                                                                                                                                                                                                                                                                                                                                                                                                                                                 | Medium    |

| Scores                                         |             |
|------------------------------------------------|-------------|
| <b>BRA</b>                                     | <b>16.5</b> |
| <b>BRA Outcome</b>                             | <b>-</b>    |
| <b>BRA+CCA</b>                                 | <b>12.5</b> |
| <b>BRA+CCA Outcome</b>                         | <b>-</b>    |
| Score partition                                |             |
| <b>A. Biogeography/Historical</b>              | <b>10.5</b> |
| 1. Domestication/Cultivation                   | 2.0         |
| 2. Climate, distribution and introduction risk | 1.0         |
| 3. Invasive elsewhere                          | 7.5         |
| <b>B. Biology/Ecology</b>                      | <b>6.0</b>  |
| 4. Undesirable (or persistence) traits         | 3.0         |
| 5. Resource exploitation                       | 5.0         |
| 6. Reproduction                                | -3.0        |
| 7. Dispersal mechanisms                        | 2.0         |
| 8. Tolerance attributes                        | -1.0        |
| <b>C. Climate change</b>                       | <b>-4.0</b> |
| 9. Climate change                              | -4.0        |
| Answered Questions                             |             |
| <b>Total</b>                                   | <b>55</b>   |
| <b>A. Biogeography/Historical</b>              | <b>13</b>   |
| 1. Domestication/Cultivation                   | 3           |
| 2. Climate, distribution and introduction risk | 5           |
| 3. Invasive elsewhere                          | 5           |
| <b>B. Biology/Ecology</b>                      | <b>36</b>   |
| 4. Undesirable (or persistence) traits         | 12          |
| 5. Resource exploitation                       | 2           |
| 6. Reproduction                                | 7           |
| 7. Dispersal mechanisms                        | 9           |
| 8. Tolerance attributes                        | 6           |
| <b>C. Climate change</b>                       | <b>6</b>    |
| 9. Climate change                              | 6           |
| Sectors affected                               |             |
| <b>Commercial</b>                              | <b>10</b>   |
| <b>Environmental</b>                           | <b>2</b>    |
| <b>Species or population nuisance traits</b>   | <b>5</b>    |

| Thresholds     |             |
|----------------|-------------|
| <b>BRA</b>     | <b>-</b>    |
| <b>BRA+CCA</b> | <b>-</b>    |
| Confidence     |             |
| <b>BRA+CCA</b> | <b>0.70</b> |
| <b>BRA</b>     | <b>0.73</b> |
| <b>CCA</b>     | <b>0.42</b> |

| Date and Time              |  |
|----------------------------|--|
| <b>21/05/2021 14:42:38</b> |  |

## AS-ISK v2

| Taxon and Assessor details         |                                         |
|------------------------------------|-----------------------------------------|
| Category                           | Fishes and Lampreys (freshwater)        |
| Taxon name                         | <i>Salmo salar</i>                      |
| Common name                        | Atlantic salmon                         |
| Assessor                           | Tamara Kanjuh                           |
| Risk screening context             |                                         |
| Reason and socio-economic benefits |                                         |
| Risk assessment area               | Danube & Adriatic basins BA, HR, ME, RS |
| Taxonomy                           |                                         |
| Native range                       |                                         |
| Introduced range                   |                                         |
| URL                                |                                         |

|                                                |      | Response                                                                                                                                                                | Justification (references and/or other information) | Confidence                                                                                                                                                                                                                                                                                                                                                                                                                                                                                                                          |           |
|------------------------------------------------|------|-------------------------------------------------------------------------------------------------------------------------------------------------------------------------|-----------------------------------------------------|-------------------------------------------------------------------------------------------------------------------------------------------------------------------------------------------------------------------------------------------------------------------------------------------------------------------------------------------------------------------------------------------------------------------------------------------------------------------------------------------------------------------------------------|-----------|
| A. Biogeography/ Historical                    |      |                                                                                                                                                                         |                                                     |                                                                                                                                                                                                                                                                                                                                                                                                                                                                                                                                     |           |
| 1. Domestication/Cultivation                   |      |                                                                                                                                                                         |                                                     |                                                                                                                                                                                                                                                                                                                                                                                                                                                                                                                                     |           |
| 1                                              | 1.01 | Has the taxon been the subject of domestication (or cultivation) for at least 20 generations?                                                                           | Yes                                                 | Since the early 1970s, and for more than 12 generations, Atlantic salmon have been subject to domestication and directional selection for economically important traits (Perry WB et al., 2019).                                                                                                                                                                                                                                                                                                                                    | Very high |
| 2                                              | 1.02 | Is the taxon harvested in the wild and likely to be sold or used in its live form?                                                                                      | Yes                                                 | Atlantic salmon is hunted in the wild for commercial and recreational purposes ( <a href="https://www.fisheries.noaa.gov/species/atlantic-salmon-">https://www.fisheries.noaa.gov/species/atlantic-salmon-</a>                                                                                                                                                                                                                                                                                                                      | Very high |
| 3                                              | 1.03 | Does the taxon have invasive races, varieties, sub-taxa or congeners?                                                                                                   | Yes                                                 | Commonly expressed concerns surrounding escaped Atlantic salmon include competition with native salmon, predation, disease transfer, hybridization, and colonization ( <a href="https://wdfw.wa.gov/species-habitats/invasive/salmo-">https://wdfw.wa.gov/species-habitats/invasive/salmo-</a>                                                                                                                                                                                                                                      | High      |
| 2. Climate, distribution and introduction risk |      |                                                                                                                                                                         |                                                     |                                                                                                                                                                                                                                                                                                                                                                                                                                                                                                                                     |           |
| 4                                              | 2.01 | How similar are the climatic conditions of the Risk Assessment (RA) area and the taxon's native range?                                                                  | Medium                                              | Dfa, Dfb (Köppen–Geiger climate classification system)                                                                                                                                                                                                                                                                                                                                                                                                                                                                              | Medium    |
| 5                                              | 2.02 | What is the quality of the climate matching data?                                                                                                                       | High                                                | Köppen–Geiger climate classification system                                                                                                                                                                                                                                                                                                                                                                                                                                                                                         | High      |
| 6                                              | 2.03 | Is the taxon already present outside of captivity in the RA area?                                                                                                       | Yes                                                 | Krka estuary, Drava and Sava River (Piria et al., 2016).                                                                                                                                                                                                                                                                                                                                                                                                                                                                            | Very high |
| 7                                              | 2.04 | How many potential vectors could the taxon use to enter in the RA area?                                                                                                 | One                                                 | Aquaculture (Piria et al., 2016).                                                                                                                                                                                                                                                                                                                                                                                                                                                                                                   | High      |
| 8                                              | 2.05 | Is the taxon currently found in close proximity to, and likely to enter into, the RA area in the near future (e.g. unintentional and intentional introductions)?        | Yes                                                 | Krka estuary, Drava and Sava River (Piria et al., 2016).                                                                                                                                                                                                                                                                                                                                                                                                                                                                            | High      |
| 3. Invasive elsewhere                          |      |                                                                                                                                                                         |                                                     |                                                                                                                                                                                                                                                                                                                                                                                                                                                                                                                                     |           |
| 9                                              | 3.01 | Has the taxon become naturalised (established viable populations) outside its native range?                                                                             | Yes                                                 | ...successful seed introduction and naturalization were reported in the upper parts of the River Krka in central Slovenia (Stanković et al., 2015).                                                                                                                                                                                                                                                                                                                                                                                 | High      |
| 10                                             | 3.02 | In the taxon's introduced range, are there known adverse impacts to wild stocks or commercial taxa?                                                                     | Yes                                                 | Concerns have been raised over the negative impacts of its farming on native fish populations and the surrounding environment. Transmission of disease and hybridization with wild populations are of particular concern (cabi.org). Jonsson and Jonsson (2006) concluded that as a result of ecological interaction and through density-dependent mechanisms, cultured fish may displace wild conspecifics to some extent, increase their mortality, and decrease their growth rate, adult size, reproductive output.              | Very high |
| 11                                             | 3.03 | In the taxon's introduced range, are there known adverse impacts to aquaculture?                                                                                        | Yes                                                 | Rapid increases in production have led to falling prices, which in turn have put increasing pressures on producers to limit costs. Significant future expansion of the industry may rely on the development of offshore sites, since most of the available suitable inshore sites are already in use, and because of increasing antagonism towards, and regulation over, further expansion in sheltered areas                                                                                                                       | Very high |
| 12                                             | 3.04 | In the taxon's introduced range, are there known adverse impacts to ecosystem                                                                                           | No                                                  | No information found.                                                                                                                                                                                                                                                                                                                                                                                                                                                                                                               | Low       |
| 13                                             | 3.05 | In the taxon's introduced range, are there known adverse socio-economic impacts?                                                                                        | No                                                  | No information found.                                                                                                                                                                                                                                                                                                                                                                                                                                                                                                               | Low       |
| B. Biology / Ecology                           |      |                                                                                                                                                                         |                                                     |                                                                                                                                                                                                                                                                                                                                                                                                                                                                                                                                     |           |
| 4. Undesirable (or persistence) traits         |      |                                                                                                                                                                         |                                                     |                                                                                                                                                                                                                                                                                                                                                                                                                                                                                                                                     |           |
| 14                                             | 4.01 | Is it likely that the taxon will be poisonous or pose other risks to human health?                                                                                      | No                                                  | No information found.                                                                                                                                                                                                                                                                                                                                                                                                                                                                                                               | Low       |
| 15                                             | 4.02 | Is it likely that the taxon will smother one or more native taxa (that are not threatened or protected)?                                                                | Yes                                                 | Effect on wild fish of escapees, through the spread of diseases, competition for food, space, and breeding partners, and genetic introgression. Transmission of ectoparasites (especially sea lice, which are species of copepod in the genera Lepeophtheirus and Caligus) from farmed fish to wild fish causing increased mortality in the latter, especially of migrating smolts ( <a href="https://www.cabi.org/isc/datasheet/65307#tosummaryOfInvasive">https://www.cabi.org/isc/datasheet/65307#tosummaryOfInvasive</a> ness). | Very high |
| 16                                             | 4.03 | Are there any threatened or protected taxa that the non-native taxon would parasitise in the RA area?                                                                   | No                                                  | No information found.                                                                                                                                                                                                                                                                                                                                                                                                                                                                                                               | Very high |
| 17                                             | 4.04 | Is the taxon adaptable in terms of climatic and other environmental conditions, thus enhancing its potential persistence if it has invaded or could invade the RA area? | No                                                  | Species with complex life cycles where habitat requirements change through ontogeny are particularly susceptible to climate change owing to the multiple climate-related drivers at each life stage (see Graham and Harrod 2009 and examples within). This is particularly relevant for anadromous salmonids, where the complexity of their life cycle means that the fish will be affected by multiple climate-related drivers at each life stage in both                                                                          | Medium    |

|                                 |      |                                                                                                                                                                    |     |                                                                                                                                                                                                                                                                                                                                                                                                              |           |
|---------------------------------|------|--------------------------------------------------------------------------------------------------------------------------------------------------------------------|-----|--------------------------------------------------------------------------------------------------------------------------------------------------------------------------------------------------------------------------------------------------------------------------------------------------------------------------------------------------------------------------------------------------------------|-----------|
| 18                              | 4.05 | Is the taxon likely to disrupt food-web structure/function in aquatic ecosystems if it has invaded or is likely to invade the RA area?                             | No  | Escaped farmed salmon occur on feeding grounds in the Atlantic Ocean and seem to consume similar food resources as wild salmon. It is unlikely that availability of food in the Atlantic Ocean limits Atlantic salmon production, and food competition from escaped farmed salmon is unlikely to be strong (Thorstad et al., 2008).                                                                          | High      |
| 19                              | 4.06 | Is the taxon likely to exert adverse impacts on ecosystem services in the RA area?                                                                                 | Yes | Local nutrient pollution into water systems from waste feed/faeces. Local chemical pollution through use of chemical treatments ( <a href="https://www.cabi.org/isc/datasheet/65307#tosummaryOfInvasive">https://www.cabi.org/isc/datasheet/65307#tosummaryOfInvasive</a> ).                                                                                                                                 | High      |
| 20                              | 4.07 | Is it likely that the taxon will host, and/or act as a vector for, recognised pests and infectious agents that are endemic in the RA area?                         | Yes | Transmission of disease wild populations are of particular concern ( <a href="https://www.cabi.org/isc/datasheet/65307#tosummaryOfInvasive">https://www.cabi.org/isc/datasheet/65307#tosummaryOfInvasive</a> ).                                                                                                                                                                                              | High      |
| 21                              | 4.08 | Is it likely that the taxon will host, and/or act as a vector for, recognised pests and infectious agents that are absent from (novel to) the RA area?             | Yes | Pancreas disease caused by toga-like virus affects farm-reared Atlantic salmon, <i>Salmo salar</i> L., smolts during their first year at sea. It has caused mortality rates of 10±50% of the yearly smolt input in Ireland (Wheatley, 1994; Menzies et al., 1996), with up to 10% of survivors failing to grow.                                                                                              | Medium    |
| 22                              | 4.09 | Is it likely that the taxon will achieve a body size that will make it more likely to be released from captivity?                                                  | No  | No information found.                                                                                                                                                                                                                                                                                                                                                                                        | Medium    |
| 23                              | 4.10 | Is the taxon capable of sustaining itself in a range of water velocity conditions (e.g. versatile in habitat use)?                                                 | Yes | The taxon has the ability to use different types of habitats (Jonsson&Jonsson, 2009; Solstorm et al., 2015).                                                                                                                                                                                                                                                                                                 | Medium    |
| 24                              | 4.11 | Is it likely that the taxon's mode of existence (e.g. excretion of by-products) or behaviours (e.g. feeding) will reduce habitat quality for native taxa?          | No  | Escaped farmed salmon occur on feeding grounds in the Atlantic Ocean and seem to consume similar food resources as wild salmon. It is unlikely that availability of food in the Atlantic Ocean limits Atlantic salmon production, and food competition from escaped farmed salmon is unlikely to be strong (Thorstad et al., 2008).                                                                          | High      |
| 25                              | 4.12 | Is the taxon likely to maintain a viable population even when present in low densities (or persisting in adverse conditions by way of a dormant form)?             | Yes | Growth rate of young-of-the-year (YOY) Atlantic salmon ( <i>Salmo salar</i> ) in low-density rivers was substantial better relative to YOY captured in normal density rivers (Vae, 2015).                                                                                                                                                                                                                    | High      |
| <b>5. Resource exploitation</b> |      |                                                                                                                                                                    |     |                                                                                                                                                                                                                                                                                                                                                                                                              |           |
| 26                              | 5.01 | Is the taxon likely to consume threatened or protected native taxa in the RA area?                                                                                 | No  | No information found.                                                                                                                                                                                                                                                                                                                                                                                        | Low       |
| 27                              | 5.02 | Is the taxon likely to sequester food resources (including nutrients) to the detriment of native taxa in the RA area?                                              | No  | Escaped farmed salmon occur on feeding grounds in the Atlantic Ocean and seem to consume similar food resources as wild salmon. It is unlikely that availability of food in the Atlantic Ocean limits Atlantic salmon production, and food competition from escaped farmed salmon is unlikely to be strong (Thorstad, 2008).                                                                                 | High      |
| <b>6. Reproduction</b>          |      |                                                                                                                                                                    |     |                                                                                                                                                                                                                                                                                                                                                                                                              |           |
| 28                              | 6.01 | Is the taxon likely to exhibit parental care and/or to reduce age-at-maturity in response to environmental conditions?                                             | No  | There is no parental investment beyond spawning ( <a href="https://animaldiversity.org/accounts/Salmo_salar/">https://animaldiversity.org/accounts/Salmo_salar/</a> ).                                                                                                                                                                                                                                       | High      |
| 29                              | 6.02 | Is the taxon likely to produce viable gametes or propagules (in the RA area)?                                                                                      | No  | No information found.                                                                                                                                                                                                                                                                                                                                                                                        | Low       |
| 30                              | 6.03 | Is the taxon likely to hybridise naturally with native taxa?                                                                                                       | Yes | Brown trout coexist with Atlantic salmon in many watersheds throughout their distribution range. Evidence from rivers in Norway and Scotland suggest that escaped farmed salmon hybridize with brown trout more frequently than their wild conspecifics (Youngson et al. 1993, Hindar & Balstad 1994).                                                                                                       | Very high |
| 31                              | 6.04 | Is the taxon likely to be hermaphroditic or to display asexual reproduction?                                                                                       | No  | No information found.                                                                                                                                                                                                                                                                                                                                                                                        | Medium    |
| 32                              | 6.05 | Is the taxon dependent on the presence of another taxon (or specific habitat features) to complete its life cycle?                                                 | No  | Atlantic salmon have similar environmental conditions as other salmonid species to maintain optimal health (Novak, 2014).                                                                                                                                                                                                                                                                                    | High      |
| 33                              | 6.06 | Is the taxon known (or likely) to produce a large number of propagules or offspring within a short time span (e.g. < 1 year)?                                      | Yes | <i>Salmo salar</i> is an iteroparous species. Female fecundity varies considerably both within and among salmon populations, as both egg number and size increase with body size (reviewed in Fleming [1996]). However, relative fecundity (i.e. eggs per kilogram body weight) varies much less (typically 1 200-2 000) and inversely with fish size (i.e. smaller fish have more eggs per kg than larger). | High      |
| 34                              | 6.07 | How many time units (days, months, years) does the taxon require to reach the age-at-first-reproduction?                                                           | 3   | Atlantic salmon show high diversity in age of maturity and may mature as parr, one- to five-sea-winter fish, and in rare instances, at older sea ages (Klemetsen et al., 2003).                                                                                                                                                                                                                              | Very high |
| <b>7. Dispersal mechanisms</b>  |      |                                                                                                                                                                    |     |                                                                                                                                                                                                                                                                                                                                                                                                              |           |
| 35                              | 7.01 | How many potential internal vectors/pathways could the taxon use to disperse within the RA area (with suitable vectors/pathways)?                                  | >1  | Agriculture and sport fishing.                                                                                                                                                                                                                                                                                                                                                                               | Medium    |
| 36                              | 7.02 | Will any of these vectors/pathways bring the taxon in close proximity to one or more protected areas (e.g. MCZ, MPA, SSSI)?                                        | Yes | Krka River (Piria et al., 2016).                                                                                                                                                                                                                                                                                                                                                                             | High      |
| 37                              | 7.03 | Does the taxon have a means of actively attaching itself to hard substrata (e.g. ship hulls, pilings, buoys) such that it enhances the likelihood of dispersal?    | No  | No information found.                                                                                                                                                                                                                                                                                                                                                                                        | Low       |
| 38                              | 7.04 | Is natural dispersal of the taxon likely to occur as eggs (for animals) or as propagules (for plants: seeds, spores) in the RA area?                               | No  | No information found.                                                                                                                                                                                                                                                                                                                                                                                        | Low       |
| 39                              | 7.05 | Is natural dispersal of the taxon likely to occur as larvae/juveniles (for animals) or as fragments/seedlings (for plants) in the RA area?                         | Yes | Natural dispersal of the taxon could occur in the juvenile stage (OESD, 2017).                                                                                                                                                                                                                                                                                                                               | Medium    |
| 40                              | 7.06 | Are older life stages of the taxon likely to migrate in the RA area for reproduction?                                                                              | No  | No information found.                                                                                                                                                                                                                                                                                                                                                                                        | Low       |
| 41                              | 7.07 | Are propagules or eggs of the taxon likely to be dispersed in the RA area by other animals?                                                                        | No  | No information found.                                                                                                                                                                                                                                                                                                                                                                                        | Low       |
| 42                              | 7.08 | Is dispersal of the taxon along any of the vectors/pathways mentioned in the previous seven questions (35–41; i.e. both unintentional or intentional) likely to be | Yes | Sport fishing.                                                                                                                                                                                                                                                                                                                                                                                               | Low       |

|                                |      |                                                                                                                                                                              |           |                                                                                                                                                                                                                            |        |
|--------------------------------|------|------------------------------------------------------------------------------------------------------------------------------------------------------------------------------|-----------|----------------------------------------------------------------------------------------------------------------------------------------------------------------------------------------------------------------------------|--------|
| 43                             | 7.09 | Is dispersal of the taxon density dependent?                                                                                                                                 | No        | No information found.                                                                                                                                                                                                      | Medium |
| <b>8. Tolerance attributes</b> |      |                                                                                                                                                                              |           |                                                                                                                                                                                                                            |        |
| 44                             | 8.01 | Is the taxon able to withstand being out of water for extended periods (e.g. minimum of one or more hours) at some stage of its life cycle?                                  | No        | No information found.                                                                                                                                                                                                      | Low    |
| 45                             | 8.02 | Is the taxon tolerant of a wide range of water quality conditions relevant to that taxon? [In the Justification field, indicate the relevant water quality variable(s) being | No        | Atlantic salmon require a minimum dissolved oxygen saturation level of 6mg/l. Dissolved oxygen below this threshold level result in depressed respiration (Novak, 2014).                                                   | High   |
| 46                             | 8.03 | Can the taxon be controlled or eradicated in the wild with chemical, biological, or other agents/means?                                                                      | No        | No information found.                                                                                                                                                                                                      | High   |
| 47                             | 8.04 | Is the taxon likely to tolerate or benefit from environmental/human disturbance?                                                                                             | No        | No information found.                                                                                                                                                                                                      | Low    |
| 48                             | 8.05 | Is the taxon able to tolerate salinity levels that are higher or lower than those found in its usual environment?                                                            | Yes       | Atlantic salmon is anadromus species ( <a href="https://www.cabi.org/isc/datasheet/65307">https://www.cabi.org/isc/datasheet/65307</a> ).                                                                                  | High   |
| 49                             | 8.06 | Are there effective natural enemies (predators) of the taxon present in the RA                                                                                               | Yes       | Birds, fish, mammals (OESD, 2017).                                                                                                                                                                                         | High   |
| <b>C. Climate change</b>       |      |                                                                                                                                                                              |           |                                                                                                                                                                                                                            |        |
| <b>9. Climate change</b>       |      |                                                                                                                                                                              |           |                                                                                                                                                                                                                            |        |
| 50                             | 9.01 | Under the predicted future climatic conditions, are the risks of entry into the RA area posed by the taxon likely to increase, decrease or not change?                       | Decrease  | The changes would not play a role in the introduction of taxa into RA.                                                                                                                                                     | Medium |
| 51                             | 9.02 | Under the predicted future climatic conditions, are the risks of establishment posed by the taxon likely to increase, decrease or not change?                                | Decrease  | Indirectly climate affects populations through, effects on their competitors, pathogens, predators and water quality, and has consequences for population viability and geographical distributions (Lehodey et al., 2006). | Medium |
| 52                             | 9.03 | Under the predicted future climatic conditions, are the risks of dispersal within the RA area posed by the taxon likely to increase, decrease or not change?                 | Decrease  | Indirectly climate affects populations through, effects on their competitors, pathogens, predators and water quality, and has consequences for population viability and geographical distributions (Lehodey et al., 2006). | Medium |
| 53                             | 9.04 | Under the predicted future climatic conditions, what is the likely magnitude of future potential impacts on biodiversity and/or ecological integrity/status?                 | No change | No impact on ecosystem function.                                                                                                                                                                                           | Medium |
| 54                             | 9.05 | Under the predicted future climatic conditions, what is the likely magnitude of future potential impacts on ecosystem structure and/or function?                             | No change | No impact on ecosystem services.                                                                                                                                                                                           | Medium |
| 55                             | 9.06 | Under the predicted future climatic conditions, what is the likely magnitude of future potential impacts on ecosystem services/socio-economic factors?                       | No change | No impact on ecosystem services.                                                                                                                                                                                           | Medium |

| Statistics                                     |             |
|------------------------------------------------|-------------|
| Scores                                         |             |
| <b>BRA</b>                                     | <b>16.0</b> |
| <b>BRA Outcome</b>                             | <b>-</b>    |
| <b>BRA+CCA</b>                                 | <b>10.0</b> |
| <b>BRA+CCA Outcome</b>                         | <b>-</b>    |
| Score partition                                |             |
| <b>A. Biogeography/Historical</b>              | <b>10.0</b> |
| 1. Domestication/Cultivation                   | 4.0         |
| 2. Climate, distribution and introduction risk | 1.0         |
| 3. Invasive elsewhere                          | 5.0         |
| <b>B. Biology/Ecology</b>                      | <b>6.0</b>  |
| 4. Undesirable (or persistence) traits         | 5.0         |
| 5. Resource exploitation                       | 0.0         |
| 6. Reproduction                                | 2.0         |
| 7. Dispersal mechanisms                        | 0.0         |
| 8. Tolerance attributes                        | -1.0        |
| <b>C. Climate change</b>                       | <b>-6.0</b> |
| 9. Climate change                              | -6.0        |
| Answered Questions                             |             |
| <b>Total</b>                                   | <b>55</b>   |
| <b>A. Biogeography/Historical</b>              | <b>13</b>   |
| 1. Domestication/Cultivation                   | 3           |
| 2. Climate, distribution and introduction risk | 5           |
| 3. Invasive elsewhere                          | 5           |
| <b>B. Biology/Ecology</b>                      | <b>36</b>   |
| 4. Undesirable (or persistence) traits         | 12          |
| 5. Resource exploitation                       | 2           |
| 6. Reproduction                                | 7           |
| 7. Dispersal mechanisms                        | 9           |
| 8. Tolerance attributes                        | 6           |
| <b>C. Climate change</b>                       | <b>6</b>    |
| 9. Climate change                              | 6           |
| Sectors affected                               |             |
| <b>Commercial</b>                              | <b>10</b>   |
| <b>Environmental</b>                           | <b>2</b>    |
| <b>Species or population nuisance traits</b>   | <b>2</b>    |

| Thresholds     |             |
|----------------|-------------|
| <b>BRA</b>     | <b>-</b>    |
| <b>BRA+CCA</b> | <b>-</b>    |
| Confidence     |             |
| <b>BRA+CCA</b> | <b>0.61</b> |
| <b>BRA</b>     | <b>0.63</b> |

|     |      |
|-----|------|
| CCA | 0.50 |
|-----|------|

|                     |
|---------------------|
| Date and Time       |
| 28/05/2021 16:45:47 |

AS-ISK v2

| Taxon and Assessor details         |                                         |
|------------------------------------|-----------------------------------------|
| Category                           | Fishes and Lampreys (freshwater)        |
| Taxon name                         | <i>Salmo salar</i>                      |
| Common name                        | Atlantic salmon                         |
| Assessor                           | Tena Radocaj                            |
| Risk screening context             |                                         |
| Reason and socio-economic benefits |                                         |
| Risk assessment area               | Danube & Adriatic basins BA, HR, ME, RS |
| Taxonomy                           |                                         |
| Native range                       |                                         |
| Introduced range                   |                                         |
| URL                                |                                         |

|                                                |      | Response                                                                                                                                                                | Justification (references and/or other information) | Confidence                                                                                                                                                                                                                                                                          |           |
|------------------------------------------------|------|-------------------------------------------------------------------------------------------------------------------------------------------------------------------------|-----------------------------------------------------|-------------------------------------------------------------------------------------------------------------------------------------------------------------------------------------------------------------------------------------------------------------------------------------|-----------|
| A. Biogeography/Historical                     |      |                                                                                                                                                                         |                                                     |                                                                                                                                                                                                                                                                                     |           |
| 1. Domestication/Cultivation                   |      |                                                                                                                                                                         |                                                     |                                                                                                                                                                                                                                                                                     |           |
| 1                                              | 1.01 | Has the taxon been the subject of domestication (or cultivation) for at least 20 generations?                                                                           | Yes                                                 | Fisheries: highly commercial; aquaculture: commercial; gamefish: yes (Fishbase)                                                                                                                                                                                                     | Very high |
| 2                                              | 1.02 | Is the taxon harvested in the wild and likely to be sold or used in its live form?                                                                                      | Yes                                                 | The Atlantic salmon is renowned among game fishermen and is a highly prized food fish. (Renzi, V. 1999. "Salmo salar" (On-line), Animal Diversity Web)                                                                                                                              | Very high |
| 3                                              | 1.03 | Does the taxon have invasive races, varieties, sub-taxa or congeners?                                                                                                   | No                                                  | No                                                                                                                                                                                                                                                                                  | Low       |
| 2. Climate, distribution and introduction risk |      |                                                                                                                                                                         |                                                     |                                                                                                                                                                                                                                                                                     |           |
| 4                                              | 2.01 | How similar are the climatic conditions of the Risk Assessment (RA) area and the taxon's native range?                                                                  | Medium                                              | The similarity between climatic conditions RA area and native range is medium. I use climatch.                                                                                                                                                                                      | Medium    |
| 5                                              | 2.02 | What is the quality of the climate matching data?                                                                                                                       | Medium                                              | Distribution Map and Climatch                                                                                                                                                                                                                                                       | Medium    |
| 6                                              | 2.03 | Is the taxon already present outside of captivity in the RA area?                                                                                                       | Yes                                                 | Piria, M., Simonović, P., Kalogianni, E., Vardakas, L., Koutsikos, N., Zanella, D., ... & Joy, M. K. (2018). Alien freshwater fish species in the Balkans—Vectors and pathways of introduction. Fish and fisheries, 19(1), 138-169.                                                 | Low       |
| 7                                              | 2.04 | How many potential vectors could the taxon use to enter in the RA area?                                                                                                 | Not applicable                                      | It is present                                                                                                                                                                                                                                                                       | Medium    |
| 8                                              | 2.05 | Is the taxon currently found in close proximity to, and likely to enter into, the RA area in the near future (e.g. unintentional and intentional introductions)?        | Not applicable                                      | It is present                                                                                                                                                                                                                                                                       | Low       |
| 3. Invasive elsewhere                          |      |                                                                                                                                                                         |                                                     |                                                                                                                                                                                                                                                                                     |           |
| 9                                              | 3.01 | Has the taxon become naturalised (established viable populations) outside its native range?                                                                             | Yes                                                 | Introductions for angling and escapes from culture have led to the establishment of wild populations in the north-east Pacific, Chile, Argentina and New Zealand (CABI, 2019)                                                                                                       | Very high |
| 10                                             | 3.02 | In the taxon's introduced range, are there known adverse impacts to wild stocks or commercial taxa?                                                                     | Yes                                                 | S. salar that escape can wreak havoc on wild populations by spreading disease and parasites to, competing with, and hybridizing with native salmon and other fish. (Global Invasive Species Database (2021) Species profile: Salmo salar)                                           | High      |
| 11                                             | 3.03 | In the taxon's introduced range, are there known adverse impacts to aquaculture?                                                                                        | No                                                  | No evidence                                                                                                                                                                                                                                                                         | Low       |
| 12                                             | 3.04 | In the taxon's introduced range, are there known adverse impacts to ecosystem services?                                                                                 | Yes                                                 | Competition with native species; S. salar compete with wild populations and other native fishes for resources. (Global Invasive Species Database (2021) Species profile: Salmo salar)                                                                                               | Very high |
| 13                                             | 3.05 | In the taxon's introduced range, are there known adverse socio-economic impacts?                                                                                        | No                                                  | It is also a highly desirable sport fish by anglers (FAO, 2009).                                                                                                                                                                                                                    | Low       |
| B. Biology/Ecology                             |      |                                                                                                                                                                         |                                                     |                                                                                                                                                                                                                                                                                     |           |
| 4. Undesirable (or persistence) traits         |      |                                                                                                                                                                         |                                                     |                                                                                                                                                                                                                                                                                     |           |
| 14                                             | 4.01 | Is it likely that the taxon will be poisonous or pose other risks to human health?                                                                                      | No                                                  | Harmless (Fishbase)                                                                                                                                                                                                                                                                 | Low       |
| 15                                             | 4.02 | Is it likely that the taxon will smother one or more native taxa (that are not threatened or protected)?                                                                | No                                                  | No evidence                                                                                                                                                                                                                                                                         | Low       |
| 16                                             | 4.03 | Are there any threatened or protected taxa that the non-native taxon would parasitise in the RA area?                                                                   | No                                                  | No evidence                                                                                                                                                                                                                                                                         | Low       |
| 17                                             | 4.04 | Is the taxon adaptable in terms of climatic and other environmental conditions, thus enhancing its potential persistence if it has invaded or could invade the RA area? | Yes                                                 | S. salar will be adaptable to climatic and other environmental conditions                                                                                                                                                                                                           | Medium    |
| 18                                             | 4.05 | Is the taxon likely to disrupt food-web structure/function in aquatic ecosystems if it has invaded or is likely to invade the RA area?                                  | Yes                                                 | No information for the RA area, generally S. salar that escape can wreak havoc on wild populations by spreading disease and parasites to, competing with, and hybridizing with native salmon and other fish. (Global Invasive Species Database (2021) Species profile: Salmo salar) | Medium    |
| 19                                             | 4.06 | Is the taxon likely to exert adverse impacts on ecosystem services in the RA area?                                                                                      | No                                                  | It will be a highly desirable sport fish for anglers (FAO, 2009).                                                                                                                                                                                                                   | Low       |
| 20                                             | 4.07 | Is it likely that the taxon will host, and/or act as a vector for, recognised pests and infectious agents that are endemic in the RA area?                              | Yes                                                 | Marcos-López, M., & Rodger, H. D. (2020). Amoebic gill disease and host response in Atlantic salmon (Salmo salar L.): A review. Parasite immunology, 42(8), e12766.                                                                                                                 | Medium    |
| 21                                             | 4.08 | Is it likely that the taxon will host, and/or act as a vector for, recognised pests and infectious agents that are absent from (novel to) the RA area?                  | Yes                                                 | Marcos-López, M., & Rodger, H. D. (2020). Amoebic gill disease and host response in Atlantic salmon (Salmo salar L.): A review. Parasite immunology, 42(8), e12766.                                                                                                                 | Medium    |
| 22                                             | 4.09 | Is it likely that the taxon will achieve a body size that will make it more likely to be released from captivity?                                                       | Yes                                                 | 150 cm TL (Fishbase)                                                                                                                                                                                                                                                                | Very high |
| 23                                             | 4.10 | Is the taxon capable of sustaining itself in a range of water velocity conditions (e.g. versatile in habitat use)?                                                      | Yes                                                 | Occurs in lakes and rocky runs and pools of small to large rivers (Fishbase)                                                                                                                                                                                                        | Low       |

|                                 |      |                                                                                                                                                                              |                |                                                                                                                                                                                                                                       |           |
|---------------------------------|------|------------------------------------------------------------------------------------------------------------------------------------------------------------------------------|----------------|---------------------------------------------------------------------------------------------------------------------------------------------------------------------------------------------------------------------------------------|-----------|
| 24                              | 4.11 | Is it likely that the taxon's mode of existence (e.g. excretion of by-products) or behaviours (e.g. feeding) will reduce habitat quality for native taxa?                    | No             | No evidence                                                                                                                                                                                                                           | Low       |
| 25                              | 4.12 | Is the taxon likely to maintain a viable population even when present in low densities (or persisting in adverse conditions by way of a dormant form)?                       | No             | No evidence                                                                                                                                                                                                                           | Low       |
| <b>5. Resource exploitation</b> |      |                                                                                                                                                                              |                |                                                                                                                                                                                                                                       |           |
| 26                              | 5.01 | Is the taxon likely to consume threatened or protected native taxa in the RA area?                                                                                           | Yes            | Juveniles feed mainly on aquatic insects, mollusks, crustaceans and fish; adults at sea feed on squids, shrimps, and fish (Fishbase)                                                                                                  | High      |
| 27                              | 5.02 | Is the taxon likely to sequester food resources (including nutrients) to the detriment of native taxa in the RA area?                                                        | Not applicable | Not applicable                                                                                                                                                                                                                        | Very high |
| <b>6. Reproduction</b>          |      |                                                                                                                                                                              |                |                                                                                                                                                                                                                                       |           |
| 28                              | 6.01 | Is the taxon likely to exhibit parental care and/or to reduce age-at-maturity in response to environmental conditions?                                                       | No             | There is no parental investment beyond spawning. (Renzi, V. 1999. "Salmo salar" (On-line), Animal Diversity Web)                                                                                                                      | Low       |
| 29                              | 6.02 | Is the taxon likely to produce viable gametes or propagules (in the RA area)?                                                                                                | Yes            | Spawning migration into freshwater lasts from June to November. Spawns at 6-10°C (Fishbase). Natural reproduction (Fishbase)                                                                                                          | Medium    |
| 30                              | 6.03 | Is the taxon likely to hybridise naturally with native taxa?                                                                                                                 | Yes            | Scribner, K. T., Page, K. S., & Bartron, M. L. (2000). Hybridization in freshwater fishes: a review of case studies and cytonuclear methods of biological inference. Reviews in Fish Biology and Fisheries, 10(3), 293-323.           | High      |
| 31                              | 6.04 | Is the taxon likely to be hermaphroditic or to display asexual reproduction?                                                                                                 | No             | No information                                                                                                                                                                                                                        | Low       |
| 32                              | 6.05 | Is the taxon dependent on the presence of another taxon (or specific habitat features) to complete its life cycle?                                                           | Yes            | Requires specific temp and substrate for spawning                                                                                                                                                                                     | Low       |
| 33                              | 6.06 | Is the taxon known (or likely) to produce a large number of propagules or offspring within a short time span (e.g. < 1 year)?                                                | No             | On average, a female deposits 700-800 eggs per pound of her body weight (Global Invasive Species Database (2021) Species profile: Salmo salar)                                                                                        | Low       |
| 34                              | 6.07 | How many time units (days, months, years) does the taxon require to reach the age-at-first-reproduction?                                                                     | 2              | Species needs at least 2-3 years before reproducing. Z 1.4 - 4.4 years www.fishbase.org                                                                                                                                               | Medium    |
| <b>7. Dispersal mechanisms</b>  |      |                                                                                                                                                                              |                |                                                                                                                                                                                                                                       |           |
| 35                              | 7.01 | How many potential internal vectors/pathways could the taxon use to disperse within the RA area (with suitable vectors)?                                                     | >1             | 1. Escape from fish farm 2. Intentional release                                                                                                                                                                                       | Medium    |
| 36                              | 7.02 | Will any of these vectors/pathways bring the taxon in close proximity to one or more protected areas (e.g. MCZ, MPA, SSSI)?                                                  | No             | No                                                                                                                                                                                                                                    | Low       |
| 37                              | 7.03 | Does the taxon have a means of actively attaching itself to hard substrata (e.g. ship hulls, pilings, buoys) such that it enhances the likelihood of dispersal?              | No             | No adaptations                                                                                                                                                                                                                        | Medium    |
| 38                              | 7.04 | Is natural dispersal of the taxon likely to occur as eggs (for animals) or as propagules (for plants: seeds, spores) in the RA area?                                         | No             | The female then covers the eggs with gravel, using the same method used to create the redd. The eggs are buried in gravel at a depth of about 12.7 to 25.4cm. (Global Invasive Species Database (2021) Species profile: Salmo salar.) | Medium    |
| 39                              | 7.05 | Is natural dispersal of the taxon likely to occur as larvae/juveniles (for animals) or as fragments/seedlings (for plants) in the RA area?                                   | Yes            | Renzi, V. 1999. "Salmo salar" (On-line), Animal Diversity Web)                                                                                                                                                                        | Medium    |
| 40                              | 7.06 | Are older life stages of the taxon likely to migrate in the RA area for reproduction?                                                                                        | Yes            | Migratory species (Fishbase)                                                                                                                                                                                                          | Medium    |
| 41                              | 7.07 | Are propagules or eggs of the taxon likely to be dispersed in the RA area by other animals?                                                                                  | No             | Fishbase                                                                                                                                                                                                                              | Low       |
| 42                              | 7.08 | Is dispersal of the taxon along any of the vectors/pathways mentioned in the previous seven questions (35-41; i.e. both unintentional or intentional) likely to be           | Yes            | Stocking, escape from fish farm                                                                                                                                                                                                       | Medium    |
| 43                              | 7.09 | Is dispersal of the taxon density dependent?                                                                                                                                 | No             | No evidence                                                                                                                                                                                                                           | Low       |
| <b>8. Tolerance attributes</b>  |      |                                                                                                                                                                              |                |                                                                                                                                                                                                                                       |           |
| 44                              | 8.01 | Is the taxon able to withstand being out of water for extended periods (e.g. minimum of one or more hours) at some stage of its life cycle?                                  | No             | Global Invasive Species Database (2021) Species profile: Salmo salar                                                                                                                                                                  | Low       |
| 45                              | 8.02 | Is the taxon tolerant of a wide range of water quality conditions relevant to that taxon? [In the Justification field, indicate the relevant water quality variable(s) being | No             | Sensitive species (Global Invasive Species Database (2021) Species profile: Salmo salar)                                                                                                                                              | Medium    |
| 46                              | 8.03 | Can the taxon be controlled or eradicated in the wild with chemical, biological, or other agents/means?                                                                      | No             | No                                                                                                                                                                                                                                    | Low       |
| 47                              | 8.04 | Is the taxon likely to tolerate or benefit from environmental/human disturbance?                                                                                             | No             | Global Invasive Species Database (2021) Species profile: Salmo salar                                                                                                                                                                  | Low       |
| 48                              | 8.05 | Is the taxon able to tolerate salinity levels that are higher or lower than those found in its usual environment?                                                            | Yes            | Global Invasive Species Database (2021) Species profile: Salmo salar                                                                                                                                                                  | High      |
| 49                              | 8.06 | Are there effective natural enemies (predators) of the taxon present in the RA                                                                                               | Yes            | Catfish, pike..                                                                                                                                                                                                                       | Medium    |
| <b>C. Climate change</b>        |      |                                                                                                                                                                              |                |                                                                                                                                                                                                                                       |           |
| <b>9. Climate change</b>        |      |                                                                                                                                                                              |                |                                                                                                                                                                                                                                       |           |
| 50                              | 9.01 | Under the predicted future climatic conditions, are the risks of entry into the RA area posed by the taxon likely to increase, decrease or not change?                       | Increase       | Human influence                                                                                                                                                                                                                       | Low       |



|    |      |                                                                                                                                                              |          |                                                                                                                                                                                                                                                                                                                                                                                                                                                                                                                   |     |
|----|------|--------------------------------------------------------------------------------------------------------------------------------------------------------------|----------|-------------------------------------------------------------------------------------------------------------------------------------------------------------------------------------------------------------------------------------------------------------------------------------------------------------------------------------------------------------------------------------------------------------------------------------------------------------------------------------------------------------------|-----|
| 51 | 9.02 | Under the predicted future climatic conditions, are the risks of establishment posed by the taxon likely to increase, decrease or not change?                | Decrease | In contrast to rainbow trout, the thermal acclimation response of Atlantic salmon is more limited. The long-term consequence is that climate change will continue to decimate wild populations of this species. (Hittle, K. A., Kwon, E. S., & Coughlin, D. J. (2021). Climate change and anadromous fish: How does thermal acclimation affect the mechanics of the myotomal muscle of the Atlantic salmon, <i>Salmo salar</i> ?. Journal of Experimental Zoology Part A: Ecological and Integrative Physiology). | Low |
| 52 | 9.03 | Under the predicted future climatic conditions, are the risks of dispersal within the RA area posed by the taxon likely to increase, decrease or not change? | Decrease | In contrast to rainbow trout, the thermal acclimation response of Atlantic salmon is more limited. The long-term consequence is that climate change will continue to decimate wild populations of this species. (Hittle, K. A., Kwon, E. S., & Coughlin, D. J. (2021). Climate change and anadromous fish: How does thermal acclimation affect the mechanics of the myotomal muscle of the Atlantic salmon, <i>Salmo salar</i> ?. Journal of Experimental Zoology Part A: Ecological and Integrative Physiology). | Low |
| 53 | 9.04 | Under the predicted future climatic conditions, what is the likely magnitude of future potential impacts on biodiversity and/or ecological integrity/status? | Lower    | In contrast to rainbow trout, the thermal acclimation response of Atlantic salmon is more limited. The long-term consequence is that climate change will continue to decimate wild populations of this species. (Hittle, K. A., Kwon, E. S., & Coughlin, D. J. (2021). Climate change and anadromous fish: How does thermal acclimation affect the mechanics of the myotomal muscle of the Atlantic salmon, <i>Salmo salar</i> ?. Journal of Experimental Zoology Part A: Ecological and Integrative Physiology). | Low |
| 54 | 9.05 | Under the predicted future climatic conditions, what is the likely magnitude of future potential impacts on ecosystem structure and/or function?             | Lower    | In contrast to rainbow trout, the thermal acclimation response of Atlantic salmon is more limited. The long-term consequence is that climate change will continue to decimate wild populations of this species. (Hittle, K. A., Kwon, E. S., & Coughlin, D. J. (2021). Climate change and anadromous fish: How does thermal acclimation affect the mechanics of the myotomal muscle of the Atlantic salmon, <i>Salmo salar</i> ?. Journal of Experimental Zoology Part A: Ecological and Integrative Physiology). | Low |
| 55 | 9.06 | Under the predicted future climatic conditions, what is the likely magnitude of future potential impacts on ecosystem services/socio-economic factors?       | Lower    | In contrast to rainbow trout, the thermal acclimation response of Atlantic salmon is more limited. The long-term consequence is that climate change will continue to decimate wild populations of this species. (Hittle, K. A., Kwon, E. S., & Coughlin, D. J. (2021). Climate change and anadromous fish: How does thermal acclimation affect the mechanics of the myotomal muscle of the Atlantic salmon, <i>Salmo salar</i> ?. Journal of Experimental Zoology Part A: Ecological and Integrative Physiology). | Low |

| Statistics                                     |      |
|------------------------------------------------|------|
| Scores                                         |      |
| BRA                                            | 21.5 |
| BRA Outcome                                    | -    |
| BRA+CCA                                        | 13.5 |
| BRA+CCA Outcome                                | -    |
| Score partition                                |      |
| A. Biogeography/Historical                     | 10.5 |
| 1. Domestication/Cultivation                   | 2.0  |
| 2. Climate, distribution and introduction risk | 1.0  |
| 3. Invasive elsewhere                          | 7.5  |
| B. Biology/Ecology                             | 11.0 |
| 4. Undesirable (or persistence) traits         | 6.0  |
| 5. Resource exploitation                       | 5.0  |
| 6. Reproduction                                | 0.0  |
| 7. Dispersal mechanisms                        | 1.0  |
| 8. Tolerance attributes                        | -1.0 |
| C. Climate change                              | -8.0 |
| 9. Climate change                              | -8.0 |
| Answered Questions                             |      |
| Total                                          | 55   |
| A. Biogeography/Historical                     | 13   |
| 1. Domestication/Cultivation                   | 3    |
| 2. Climate, distribution and introduction risk | 5    |
| 3. Invasive elsewhere                          | 5    |
| B. Biology/Ecology                             | 36   |
| 4. Undesirable (or persistence) traits         | 12   |
| 5. Resource exploitation                       | 2    |
| 6. Reproduction                                | 7    |
| 7. Dispersal mechanisms                        | 9    |
| 8. Tolerance attributes                        | 6    |
| C. Climate change                              | 6    |
| 9. Climate change                              | 6    |
| Sectors affected                               |      |
| Commercial                                     | 7    |
| Environmental                                  | 5    |
| Species or population nuisance traits          | 5    |

| Thresholds |      |
|------------|------|
| BRA        | -    |
| BRA+CCA    | -    |
| Confidence |      |
| BRA+CCA    | 0.45 |
| BRA        | 0.47 |
| CCA        | 0.25 |

| Date and Time       |
|---------------------|
| 01/06/2021 18:19:51 |

## AS-ISK v2

| Taxon and Assessor details         |                                         |
|------------------------------------|-----------------------------------------|
| Category                           | Fishes and Lampreys (freshwater)        |
| Taxon name                         | <i>Salmo trutta</i>                     |
| Common name                        | brown trout                             |
| Assessor                           | Ana Marić                               |
| Risk screening context             |                                         |
| Reason and socio-economic benefits |                                         |
| Risk assessment area               | Danube & Adriatic basins BA, HR, ME, RS |
| Taxonomy                           |                                         |
| Native range                       |                                         |
| Introduced range                   |                                         |
| URL                                |                                         |

|                                                |      | Response                                                                                                                                                                | Justification (references and/or other information) | Confidence                                                                                                                                                                                                                                                                                                                                                                                                                                                      |           |
|------------------------------------------------|------|-------------------------------------------------------------------------------------------------------------------------------------------------------------------------|-----------------------------------------------------|-----------------------------------------------------------------------------------------------------------------------------------------------------------------------------------------------------------------------------------------------------------------------------------------------------------------------------------------------------------------------------------------------------------------------------------------------------------------|-----------|
| A. Biogeography/ Historical                    |      |                                                                                                                                                                         |                                                     |                                                                                                                                                                                                                                                                                                                                                                                                                                                                 |           |
| 1. Domestication/Cultivation                   |      |                                                                                                                                                                         |                                                     |                                                                                                                                                                                                                                                                                                                                                                                                                                                                 |           |
| 1                                              | 1.01 | Has the taxon been the subject of domestication (or cultivation) for at least 20 generations?                                                                           | Yes                                                 | <a href="https://www.researchgate.net/publication/319344554_Diversity_of_brown_trout_Salmo_cf_trutta_in_the_River_Danube_basin_of_Western_Balkans_as_assessed_from_the_structure_of_their_mitochondrial_Control_Region_haplotypes">https://www.researchgate.net/publication/319344554_Diversity_of_brown_trout_Salmo_cf_trutta_in_the_River_Danube_basin_of_Western_Balkans_as_assessed_from_the_structure_of_their_mitochondrial_Control_Region_haplotypes</a> | Very high |
| 2                                              | 1.02 | Is the taxon harvested in the wild and likely to be sold or used in its live form?                                                                                      | Yes                                                 | Effects of stocking on the genetic structure of Effects of stocking on the genetic structure of brown trout, <i>Salmo trutta</i> , in Central Europe Effects of stocking on the genetic structure of brown trout, <i>Salmo trutta</i> , in Central Europeinferred from mitochondrial and nuclear DNA markers 2012. Kohout et al.                                                                                                                                | Very high |
| 3                                              | 1.03 | Does the taxon have invasive races, varieties, sub-taxa or congeners?                                                                                                   | No                                                  | Its invasive itself, other taxons are introduced no invasive*                                                                                                                                                                                                                                                                                                                                                                                                   | Low       |
| 2. Climate, distribution and introduction risk |      |                                                                                                                                                                         |                                                     |                                                                                                                                                                                                                                                                                                                                                                                                                                                                 |           |
| 4                                              | 2.01 | How similar are the climatic conditions of the Risk Assessment (RA) area and the taxon's native range?                                                                  | Medium                                              | Near Bratislava 8, and France 6, 11 points in orange (Climatch)                                                                                                                                                                                                                                                                                                                                                                                                 | Medium    |
| 5                                              | 2.02 | What is the quality of the climate matching data?                                                                                                                       | Medium                                              | Climatch +personal assesment                                                                                                                                                                                                                                                                                                                                                                                                                                    | Medium    |
| 6                                              | 2.03 | Is the taxon already present outside of captivity in the RA area?                                                                                                       | Yes                                                 | Risks to Stocks of Native Trout of the Genus <i>Salmo</i> (Actinîpterygii: Salmoniformes: Salmonidae) of Serbia and Management for their Recovery                                                                                                                                                                                                                                                                                                               | Very high |
| 7                                              | 2.04 | How many potential vectors could the taxon use to enter in the RA area?                                                                                                 | >1                                                  | Stocking and escape fom fish ponds.                                                                                                                                                                                                                                                                                                                                                                                                                             | Medium    |
| 8                                              | 2.05 | Is the taxon currently found in close proximity to, and likely to enter into, the RA area in the near future (e.g. unintentional and intentional introductions)?        | Yes                                                 | <a href="https://www.researchgate.net/publication/344114601_Diversity_of_brown_trout_Salmo_trutta_Actinopterygii_Salmoniformes_Salmonidae_in_the_Danube_River_basin_of_Croatia_revealed_by_mitochondrial_DNA">https://www.researchgate.net/publication/344114601_Diversity_of_brown_trout_Salmo_trutta_Actinopterygii_Salmoniformes_Salmonidae_in_the_Danube_River_basin_of_Croatia_revealed_by_mitochondrial_DNA</a>                                           | High      |
| 3. Invasive elsewhere                          |      |                                                                                                                                                                         |                                                     |                                                                                                                                                                                                                                                                                                                                                                                                                                                                 |           |
| 9                                              | 3.01 | Has the taxon become naturalised (established viable populations) outside its native range?                                                                             | Yes                                                 | INVASION BIOLOGY AND ECOLOGICAL IMPACTS OF INVASION BIOLOGY AND ECOLOGICAL IMPACTS OF BROWN TROUT <i>Salmo trutta</i> IN NEW ZEALAND Colin R. Townsend                                                                                                                                                                                                                                                                                                          | Medium    |
| 10                                             | 3.02 | In the taxon's introduced range, are there known adverse impacts to wild stocks or commercial taxa?                                                                     | Yes                                                 | INVASION BIOLOGY AND ECOLOGICAL IMPACTS OF INVASION BIOLOGY AND ECOLOGICAL IMPACTS OF BROWN TROUT <i>Salmo trutta</i> IN NEW ZEALAND Colin R. Townsend                                                                                                                                                                                                                                                                                                          | Very high |
| 11                                             | 3.03 | In the taxon's introduced range, are there known adverse impacts to aquaculture?                                                                                        | No                                                  | A handbook of global freshwater invasive species. Francis. 2012                                                                                                                                                                                                                                                                                                                                                                                                 | Medium    |
| 12                                             | 3.04 | In the taxon's introduced range, are there known adverse impacts to ecosystem                                                                                           | Yes                                                 | A handbook of global freshwater invasive species. Francis. 2012                                                                                                                                                                                                                                                                                                                                                                                                 | Medium    |
| 13                                             | 3.05 | In the taxon's introduced range, are there known adverse socio-economic impacts?                                                                                        | Yes                                                 | A handbook of global freshwater invasive species. Francis. 2012                                                                                                                                                                                                                                                                                                                                                                                                 | Medium    |
| B. Biology/ Ecology                            |      |                                                                                                                                                                         |                                                     |                                                                                                                                                                                                                                                                                                                                                                                                                                                                 |           |
| 4. Undesirable (or persistence) traits         |      |                                                                                                                                                                         |                                                     |                                                                                                                                                                                                                                                                                                                                                                                                                                                                 |           |
| 14                                             | 4.01 | Is it likely that the taxon will be poisonous or pose other risks to human health?                                                                                      | No                                                  | Not toxic.                                                                                                                                                                                                                                                                                                                                                                                                                                                      | Very high |
| 15                                             | 4.02 | Is it likely that the taxon will smother one or more native taxa (that are not threatened or protected)?                                                                | Yes                                                 | A handbook of global freshwater invasive species. Francis. 2012                                                                                                                                                                                                                                                                                                                                                                                                 | Very high |
| 16                                             | 4.03 | Are there any threatened or protected taxa that the non-native taxon would parasitise in the RA area?                                                                   | No                                                  | Not a parasite.                                                                                                                                                                                                                                                                                                                                                                                                                                                 | Very high |
| 17                                             | 4.04 | Is the taxon adaptable in terms of climatic and other environmental conditions, thus enhancing its potential persistence if it has invaded or could invade the RA area? | Yes                                                 | A review of the likely effects of climate change on anadromous Atlantic salmon <i>Salmo salar</i> and brown trout A review of the likely effects of climate change on anadromous Atlantic salmon <i>Salmo salar</i> and brown trout <i>Salmo trutta</i> , with particular reference to water temperature and flow. Jonsson and Jonsson 2009                                                                                                                     | Very high |
| 18                                             | 4.05 | Is the taxon likely to disrupt food-web structure/function in aquatic ecosystems if it has invaded or is likely to invade the RA                                        | Yes                                                 | A handbook of global freshwater invasive species. Francis. 2012                                                                                                                                                                                                                                                                                                                                                                                                 | High      |
| 19                                             | 4.06 | Is the taxon likely to exert adverse impacts on ecosystem services in the RA area?                                                                                      | Yes                                                 | A handbook of global freshwater invasive species. Francis. 2012                                                                                                                                                                                                                                                                                                                                                                                                 | High      |
| 20                                             | 4.07 | Is it likely that the taxon will host, and/or act as a vector for, recognised pests and infectious agents that are endemic in the RA                                    | Yes                                                 | INVASION BIOLOGY AND ECOLOGICAL IMPACTS OF BROWN TROUT <i>Salmo trutta</i> IN NEW ZEALAND. Colin R. Townsend 1996.                                                                                                                                                                                                                                                                                                                                              | Very high |
| 21                                             | 4.08 | Is it likely that the taxon will host, and/or act as a vector for, recognised pests and infectious agents that are absent from (novel to) the RA area?                  | Yes                                                 | INVASION BIOLOGY AND ECOLOGICAL IMPACTS OF BROWN TROUT <i>Salmo trutta</i> IN NEW ZEALAND. Colin R. Townsend 1996.                                                                                                                                                                                                                                                                                                                                              | Very high |
| 22                                             | 4.09 | Is it likely that the taxon will achieve a body size that will make it more likely to be released from captivity?                                                       | Yes                                                 | INVASION BIOLOGY AND ECOLOGICAL IMPACTS OF BROWN TROUT <i>Salmo trutta</i> IN NEW ZEALAND. Colin R. Townsend 1996.                                                                                                                                                                                                                                                                                                                                              | Very high |
| 23                                             | 4.10 | Is the taxon capable of sustaining itself in a range of water velocity conditions (e.g. versatile in habitat use)?                                                      | Yes                                                 | Ecology of brown trout and atlantic salmon. Jonsson and Jonsson 2011.                                                                                                                                                                                                                                                                                                                                                                                           | Very high |

|                                 |      |                                                                                                                                                                                           |     |                                                                                                                                                                                                                                                                                                                                               |           |
|---------------------------------|------|-------------------------------------------------------------------------------------------------------------------------------------------------------------------------------------------|-----|-----------------------------------------------------------------------------------------------------------------------------------------------------------------------------------------------------------------------------------------------------------------------------------------------------------------------------------------------|-----------|
| 24                              | 4.11 | Is it likely that the taxon's mode of existence (e.g. excretion of by-products) or behaviours (e.g. feeding) will reduce habitat quality for native taxa?                                 | Yes | A handbook of global freshwater invasive species. Francis. 2012                                                                                                                                                                                                                                                                               | High      |
| 25                              | 4.12 | Is the taxon likely to maintain a viable population even when present in low densities (or persisting in adverse conditions by way of a dormant form)?                                    | Yes | Haplotype diversity of brown trout <i>Salmo trutta</i> (L.) in the broader Iron Gate area. 2016. Ana TOŠIĆ1,*, Dubravka ŠKRABA1, Vera NIKOLIĆ1, Jelena ČANAK ATLAGIĆ2, Danilo MRDAK3, Predrag SIMONOVIĆ1                                                                                                                                      | Very high |
| <b>5. Resource exploitation</b> |      |                                                                                                                                                                                           |     |                                                                                                                                                                                                                                                                                                                                               |           |
| 26                              | 5.01 | Is the taxon likely to consume threatened or protected native taxa in the RA area?                                                                                                        | Yes | A handbook of global freshwater invasive species. Francis. 2012                                                                                                                                                                                                                                                                               | Very high |
| 27                              | 5.02 | Is the taxon likely to sequester food resources (including nutrients) to the detriment of native taxa in the RA area?                                                                     | Yes | A handbook of global freshwater invasive species. Francis. 2012,                                                                                                                                                                                                                                                                              | High      |
| <b>6. Reproduction</b>          |      |                                                                                                                                                                                           |     |                                                                                                                                                                                                                                                                                                                                               |           |
| 28                              | 6.01 | Is the taxon likely to exhibit parental care and/or to reduce age-at-maturity in response to environmental conditions?                                                                    | Yes | A review of the likely effects of climate change on anadromous Atlantic salmon <i>Salmo salar</i> and brown trout A review of the likely effects of climate change on anadromous Atlantic salmon <i>Salmo salar</i> and brown trout <i>Salmo trutta</i> , with particular reference to water temperature and flow. 2009. Jonsson and Jonsson. | High      |
| 29                              | 6.02 | Is the taxon likely to produce viable gametes or propagules (in the RA area)?                                                                                                             | Yes | INVASION BIOLOGY AND ECOLOGICAL IMPACTS OF BROWN TROUT <i>Salmo trutta</i> IN NEW ZEALAND. 1996. Colin R. Townsend                                                                                                                                                                                                                            | Very high |
| 30                              | 6.03 | Is the taxon likely to hybridise naturally with native taxa?                                                                                                                              | Yes | A handbook of global freshwater invasive species. Francis. 2012 Ecology of brown trout and atlantic salmon. Jonsson and Jonsson 2011. IUCN: <i>Salmo trutta</i> , Brown Trout Assessment by: Freyhof, J.                                                                                                                                      | High      |
| 31                              | 6.04 | Is the taxon likely to be hermaphroditic or to display asexual reproduction?                                                                                                              | No  | Personal assesment                                                                                                                                                                                                                                                                                                                            | High      |
| 32                              | 6.05 | Is the taxon dependent on the presence of another taxon (or specific habitat features) to complete its life cycle?                                                                        | No  | Vertebrate. Non dependent of another taxon.                                                                                                                                                                                                                                                                                                   | Very high |
| 33                              | 6.06 | Is the taxon known (or likely) to produce a large number of propagules or offspring within a short time span (e.g. < 1 year)?                                                             | Yes | INVASION BIOLOGY AND ECOLOGICAL IMPACTS OF BROWN TROUT <i>Salmo trutta</i> IN NEW ZEALAND. 1996. Colin R. Townsend                                                                                                                                                                                                                            | Very high |
| 34                              | 6.07 | How many time units (days, months, years) does the taxon require to reach the age-at-first-reproduction?                                                                                  | 2   | The IUCN Red List of Threatened Species™ ISSN 2307-8235 (online) IUCN 2008: T19861A9050312, <i>Salmo trutta</i> , Brown Trout Assessment by: Freyhof, J.                                                                                                                                                                                      | Very high |
| <b>7. Dispersal mechanisms</b>  |      |                                                                                                                                                                                           |     |                                                                                                                                                                                                                                                                                                                                               |           |
| 35                              | 7.01 | How many potential internal vectors/pathways could the taxon use to disperse within the RA area (with suitable)                                                                           | >1  | Stocking and aquaculture                                                                                                                                                                                                                                                                                                                      | High      |
| 36                              | 7.02 | Will any of these vectors/pathways bring the taxon in close proximity to one or more protected areas (e.g. MCZ, MPA, SSSI)?                                                               | Yes | Maybe in Croatia for MPA In Serbia: Haplotype diversity of brown trout <i>Salmo trutta</i> (L.) in the broader Iron Gate area Ana TOŠIĆ1,*, Dubravka ŠKRABA1, Vera NIKOLIĆ1, Jelena ČANAK ATLAGIĆ2, Danilo MRDAK3, Predrag SIMONOVIĆ1                                                                                                         | Medium    |
| 37                              | 7.03 | Does the taxon have a means of actively attaching itself to hard substrata (e.g. ship hulls, pilings, buoys) such that it enhances the likelihood of dispersal?                           | No  | No such adaptation.                                                                                                                                                                                                                                                                                                                           | Very high |
| 38                              | 7.04 | Is natural dispersal of the taxon likely to occur as eggs (for animals) or as propagules (for plants: seeds, spores) in the RA area?                                                      | No  | no evidence for no.                                                                                                                                                                                                                                                                                                                           | Medium    |
| 39                              | 7.05 | Is natural dispersal of the taxon likely to occur as larvae/juveniles (for animals) or as fragments/seedlings (for plants) in the RA area?                                                | Yes | INVASION BIOLOGY AND ECOLOGICAL IMPACTS OF BROWN TROUT <i>Salmo trutta</i> IN NEW ZEALAND. 1996. Colin R. Townsend                                                                                                                                                                                                                            | High      |
| 40                              | 7.06 | Are older life stages of the taxon likely to migrate in the RA area for reproduction?                                                                                                     | Yes | Brown Trout ( <i>Salmo trutta</i> ): A Technical Conservation Assessment. Laura Belica1 with life cycle model by David                                                                                                                                                                                                                        | Very high |
| 41                              | 7.07 | Are propagules or eggs of the taxon likely to be dispersed in the RA area by other animals?                                                                                               | No  | They will probably eat them.                                                                                                                                                                                                                                                                                                                  | High      |
| 42                              | 7.08 | Is dispersal of the taxon along any of the vectors/pathways mentioned in the previous seven questions (35–41; i.e. both unintentional or intentional) likely to be                        | Yes | INVASION BIOLOGY AND ECOLOGICAL IMPACTS OF BROWN TROUT <i>Salmo trutta</i> IN NEW ZEALAND. 1996. Colin R. Townsend                                                                                                                                                                                                                            | High      |
| 43                              | 7.09 | Is dispersal of the taxon density dependent?                                                                                                                                              | Yes | Somewhat, partial migratority. Ecology of brown trout and atlantic salmon. Jonsson and Jonsson 2011.                                                                                                                                                                                                                                          | High      |
| <b>8. Tolerance attributes</b>  |      |                                                                                                                                                                                           |     |                                                                                                                                                                                                                                                                                                                                               |           |
| 44                              | 8.01 | Is the taxon able to withstand being out of water for extended periods (e.g. minimum of one or more hours) at some stage of its life cycle?                                               | No  | Brown trout can stand only few minutes out of the water.                                                                                                                                                                                                                                                                                      | High      |
| 45                              | 8.02 | Is the taxon tolerant of a wide range of water quality conditions relevant to that taxon? [In the Justification field, indicate the relevant water quality variable(s) being considered.] | No  | Ecology of brown trout and atlantic salmon. Jonsson and Jonsson 2011. But can tolerate some chemicals Arsenic accumulation in a freshwater fish living in a contaminated river of Corsica, France. 2009. Julia-Laurence Culioli a, , Serge Calendini b, Christophe Mori a, Antoine Orsini a                                                   | Medium    |
| 46                              | 8.03 | Can the taxon be controlled or eradicated in the wild with chemical, biological, or other agents/means?                                                                                   | No  | A handbook of global freshwater invasive species. Francis. 2012 Cant be eradicated but less numbered                                                                                                                                                                                                                                          | High      |
| 47                              | 8.04 | Is the taxon likely to tolerate or benefit from environmental/human disturbance?                                                                                                          | No  | Personal assesment. MAYbe tolerate (Arsenic). IUCN red list                                                                                                                                                                                                                                                                                   | High      |
| 48                              | 8.05 | Is the taxon able to tolerate salinity levels that are higher or lower than those found in its usual environment?                                                                         | Yes | yes, some individuals are anadromous. Ecology of brown trout and atlantic salmon. Jonsson and Jonsson 2011.                                                                                                                                                                                                                                   | Very high |
| 49                              | 8.06 | Are there effective natural enemies (predators) of the taxon present in the RA area?                                                                                                      | Yes | Other fishes eat trout eggs. Lutra and Mustela. <a href="https://deepblue.lib.umich.edu/bitstream/handle/2027.42/141891/tafs0239.pdf?sequence=1">https://deepblue.lib.umich.edu/bitstream/handle/2027.42/141891/tafs0239.pdf?sequence=1</a>                                                                                                   | Medium    |
| <b>C. Climate change</b>        |      |                                                                                                                                                                                           |     |                                                                                                                                                                                                                                                                                                                                               |           |
| <b>9. Climate change</b>        |      |                                                                                                                                                                                           |     |                                                                                                                                                                                                                                                                                                                                               |           |

|    |      |                                                                                                                                                              |           |                                                                        |        |
|----|------|--------------------------------------------------------------------------------------------------------------------------------------------------------------|-----------|------------------------------------------------------------------------|--------|
| 50 | 9.01 | Under the predicted future climatic conditions, are the risks of entry into the RA area posed by the taxon likely to increase, decrease or not change?       | No change | Personal assesment                                                     | Medium |
| 51 | 9.02 | Under the predicted future climatic conditions, are the risks of establishment posed by the taxon likely to increase, decrease or not change?                | No change | Professional judgement                                                 | Medium |
| 52 | 9.03 | Under the predicted future climatic conditions, are the risks of dispersal within the RA area posed by the taxon likely to increase, decrease or not change? | No change | Prof. judgement                                                        | Medium |
| 53 | 9.04 | Under the predicted future climatic conditions, what is the likely magnitude of future potential impacts on biodiversity and/or ecological integrity/status? | Lower     | Prof. judgement                                                        | Medium |
| 54 | 9.05 | Under the predicted future climatic conditions, what is the likely magnitude of future potential impacts on ecosystem structure and/or function?             | Lower     | Prof judgement                                                         | Medium |
| 55 | 9.06 | Under the predicted future climatic conditions, what is the likely magnitude of future potential impacts on ecosystem services/socio-economic factors?       | No change | RA and their water habitats are not under big climaic change pressure. | Medium |

| Statistics                                     |             |
|------------------------------------------------|-------------|
| Scores                                         |             |
| <b>BRA</b>                                     | <b>37.5</b> |
| <b>BRA Outcome</b>                             | <b>-</b>    |
| <b>BRA+CCA</b>                                 | <b>33.5</b> |
| <b>BRA+CCA Outcome</b>                         | <b>-</b>    |
| Score partition                                |             |
| <b>A. Biogeography/Historical</b>              | <b>14.5</b> |
| 1. Domestication/Cultivation                   | 2.0         |
| 2. Climate, distribution and introduction risk | 2.0         |
| 3. Invasive elsewhere                          | 10.5        |
| <b>B. Biology/Ecology</b>                      | <b>23.0</b> |
| 4. Undesirable (or persistence) traits         | 10.0        |
| 5. Resource exploitation                       | 7.0         |
| 6. Reproduction                                | 4.0         |
| 7. Dispersal mechanisms                        | 3.0         |
| 8. Tolerance attributes                        | -1.0        |
| <b>C. Climate change</b>                       | <b>-4.0</b> |
| 9. Climate change                              | -4.0        |
| Answered Questions                             |             |
| <b>Total</b>                                   | <b>55</b>   |
| <b>A. Biogeography/Historical</b>              | <b>13</b>   |
| 1. Domestication/Cultivation                   | 3           |
| 2. Climate, distribution and introduction risk | 5           |
| 3. Invasive elsewhere                          | 5           |
| <b>B. Biology/Ecology</b>                      | <b>36</b>   |
| 4. Undesirable (or persistence) traits         | 12          |
| 5. Resource exploitation                       | 2           |
| 6. Reproduction                                | 7           |
| 7. Dispersal mechanisms                        | 9           |
| 8. Tolerance attributes                        | 6           |
| <b>C. Climate change</b>                       | <b>6</b>    |
| 9. Climate change                              | 6           |
| Sectors affected                               |             |
| <b>Commercial</b>                              | <b>13</b>   |
| <b>Environmental</b>                           | <b>8</b>    |
| <b>Species or population nuisance traits</b>   | <b>18</b>   |

| Thresholds     |             |
|----------------|-------------|
| <b>BRA</b>     | <b>-</b>    |
| <b>BRA+CCA</b> | <b>-</b>    |
| Confidence     |             |
| <b>BRA+CCA</b> | <b>0.76</b> |
| <b>BRA</b>     | <b>0.79</b> |
| <b>CCA</b>     | <b>0.50</b> |

| Date and Time       |  |
|---------------------|--|
| 10/05/2021 13:24:48 |  |

## AS-ISK v2

| Taxon and Assessor details         |                                         |
|------------------------------------|-----------------------------------------|
| Category                           | Fishes and Lampreys (freshwater)        |
| Taxon name                         | <i>Salmo trutta</i>                     |
| Common name                        | brown trout                             |
| Assessor                           | Ivan Špelić                             |
| Risk screening context             |                                         |
| Reason and socio-economic benefits |                                         |
| Risk assessment area               | Danube & Adriatic basins BA, HR, ME, RS |
| Taxonomy                           |                                         |
| Native range                       |                                         |
| Introduced range                   |                                         |
| URL                                |                                         |

|                                                |      | Response                                                                                                                                                                | Justification (references and/or other information) | Confidence                                                                                                                                                                                                                                                                                                                                                                                                                                                       |           |
|------------------------------------------------|------|-------------------------------------------------------------------------------------------------------------------------------------------------------------------------|-----------------------------------------------------|------------------------------------------------------------------------------------------------------------------------------------------------------------------------------------------------------------------------------------------------------------------------------------------------------------------------------------------------------------------------------------------------------------------------------------------------------------------|-----------|
| A. Biogeography/ Historical                    |      |                                                                                                                                                                         |                                                     |                                                                                                                                                                                                                                                                                                                                                                                                                                                                  |           |
| 1. Domestication/ Cultivation                  |      |                                                                                                                                                                         |                                                     |                                                                                                                                                                                                                                                                                                                                                                                                                                                                  |           |
| 1                                              | 1.01 | Has the taxon been the subject of domestication (or cultivation) for at least 20 generations?                                                                           | Yes                                                 | For restocking of natural waters (angling) (Cultured Aquatic Species Information Programme. <i>Salmo trutta</i> . Cultured Aquatic Species Information Programme. Text by Vandeputte, M. & Labbé, L. In: FAO Fisheries and Aquaculture Department [online]. Rome. Updated 1 January 2012. [Cited 25 February 2020].)                                                                                                                                             | Very high |
| 2                                              | 1.02 | Is the taxon harvested in the wild and likely to be sold or used in its live form?                                                                                      | Yes                                                 | Restocking purposes (personal opinion).                                                                                                                                                                                                                                                                                                                                                                                                                          | Low       |
| 3                                              | 1.03 | Does the taxon have invasive races, varieties, sub-taxa or congeners?                                                                                                   | No                                                  | No such information.                                                                                                                                                                                                                                                                                                                                                                                                                                             | High      |
| 2. Climate, distribution and introduction risk |      |                                                                                                                                                                         |                                                     |                                                                                                                                                                                                                                                                                                                                                                                                                                                                  |           |
| 4                                              | 2.01 | How similar are the climatic conditions of the Risk Assessment (RA) area and the taxon's native range?                                                                  | High                                                | Climatch 2020.                                                                                                                                                                                                                                                                                                                                                                                                                                                   | Medium    |
| 5                                              | 2.02 | What is the quality of the climate matching data?                                                                                                                       | Medium                                              | Climatch 2020.                                                                                                                                                                                                                                                                                                                                                                                                                                                   | High      |
| 6                                              | 2.03 | Is the taxon already present outside of captivity in the RA area?                                                                                                       | Yes                                                 | Freyhof, J. 2011. <i>Salmo trutta</i> . The IUCN Red List of Threatened Species 2011: e.T19861A9050312. <a href="https://dx.doi.org/10.2305/IUCN.UK.2008.RLTS.T19861A9050312.en">https://dx.doi.org/10.2305/IUCN.UK.2008.RLTS.T19861A9050312.en</a> . Downloaded on 25 February 2020., Froese, R. and D. Pauly. Editors. 2019.FishBase. World Wide Web electronic publication. <a href="http://www.fishbase.org">www.fishbase.org</a> , ( 12/2019 )              | Very high |
| 7                                              | 2.04 | How many potential vectors could the taxon use to enter in the RA area?                                                                                                 | Not applicable                                      | Already present (IUCN 2011).                                                                                                                                                                                                                                                                                                                                                                                                                                     | Very high |
| 8                                              | 2.05 | Is the taxon currently found in close proximity to, and likely to enter into, the RA area in the near future (e.g. unintentional and intentional introductions)?        | Not applicable                                      | Already present (IUCN 2011).                                                                                                                                                                                                                                                                                                                                                                                                                                     | Very high |
| 3. Invasive elsewhere                          |      |                                                                                                                                                                         |                                                     |                                                                                                                                                                                                                                                                                                                                                                                                                                                                  |           |
| 9                                              | 3.01 | Has the taxon become naturalised (established viable populations) outside its native range?                                                                             | Yes                                                 | IUCN 2011, Global Invasive Species Database (2020) Species profile: <i>Salmo trutta</i> . Downloaded from <a href="http://www.iucngisd.org/gisd/speciesname/Salmo+trutta">http://www.iucngisd.org/gisd/speciesname/Salmo+trutta</a> on 25-02-2020.                                                                                                                                                                                                               | Very high |
| 10                                             | 3.02 | In the taxon's introduced range, are there known adverse impacts to wild stocks or commercial taxa?                                                                     | Yes                                                 | Brown trout have been implicated in reducing native fish populations (especially other salmonids) through predation, displacement, food competition and hybridization (Global Invasive Species Database (2020) Species profile: <i>Salmo trutta</i> . Downloaded from <a href="http://www.iucngisd.org/gisd/speciesname/Salmo+trutta">http://www.iucngisd.org/gisd/speciesname/Salmo+trutta</a> on 25-                                                           | Very high |
| 11                                             | 3.03 | In the taxon's introduced range, are there known adverse impacts to aquaculture?                                                                                        | No                                                  | Farmed, no adverse impact (FAO rome 2005).                                                                                                                                                                                                                                                                                                                                                                                                                       | Very high |
| 12                                             | 3.04 | In the taxon's introduced range, are there known adverse impacts to ecosystem services?                                                                                 | Yes                                                 | Brown trout have been implicated in reducing native fish populations (especially other salmonids) through predation, displacement, food competition and hybridization (Global Invasive Species Database (2020) Species profile: <i>Salmo trutta</i> . Downloaded from <a href="http://www.iucngisd.org/gisd/speciesname/Salmo+trutta">http://www.iucngisd.org/gisd/speciesname/Salmo+trutta</a> on 25-                                                           | Medium    |
| 13                                             | 3.05 | In the taxon's introduced range, are there known adverse socio-economic impacts?                                                                                        | Yes                                                 | Brown trout have been implicated in reducing native fish populations (especially other salmonids) through predation, displacement, food competition and hybridization (Global Invasive Species Database (2020) Species profile: <i>Salmo trutta</i> . Downloaded from <a href="http://www.iucngisd.org/gisd/speciesname/Salmo+trutta">http://www.iucngisd.org/gisd/speciesname/Salmo+trutta</a> on 25-02-2020). Reducing numbers of maybe more attractive native | Low       |
| B. Biology/ Ecology                            |      |                                                                                                                                                                         |                                                     |                                                                                                                                                                                                                                                                                                                                                                                                                                                                  |           |
| 4. Undesirable (or persistence) traits         |      |                                                                                                                                                                         |                                                     |                                                                                                                                                                                                                                                                                                                                                                                                                                                                  |           |
| 14                                             | 4.01 | Is it likely that the taxon will be poisonous or pose other risks to human health?                                                                                      | No                                                  | No risk for human health, listed as potential pest (Froese, R. and D. Pauly. Editors. 2019.FishBase. World Wide Web electronic publication. <a href="http://www.fishbase.org">www.fishbase.org</a> , ( 12/2019 ).                                                                                                                                                                                                                                                | Very high |
| 15                                             | 4.02 | Is it likely that the taxon will smother one or more native taxa (that are not threatened or protected)?                                                                | Yes                                                 | Brown trout have been implicated in reducing native fish populations (especially other salmonids) through predation, displacement, food competition and hybridization (Global Invasive Species Database (2020) Species profile: <i>Salmo trutta</i> . Downloaded from <a href="http://www.iucngisd.org/gisd/speciesname/Salmo+trutta">http://www.iucngisd.org/gisd/speciesname/Salmo+trutta</a> on 25-                                                           | Very high |
| 16                                             | 4.03 | Are there any threatened or protected taxa that the non-native taxon would parasitise in the RA area?                                                                   | No                                                  | No such information                                                                                                                                                                                                                                                                                                                                                                                                                                              | Very high |
| 17                                             | 4.04 | Is the taxon adaptable in terms of climatic and other environmental conditions, thus enhancing its potential persistence if it has invaded or could invade the RA area? | No                                                  | They prefer cold, well-oxygenated upland waters although their tolerance limits are lower than those of rainbow trout and favors large streams in the mountainous areas with adequate cover in the form of submerged rocks, undercut banks, and overhanging vegetation (Froese, R. and D. Pauly. Editors. 2019.FishBase. World Wide Web electronic publication. <a href="http://www.fishbase.org">www.fishbase.org</a> , (                                       | Very high |

|                                 |      |                                                                                                                                                                    |                |                                                                                                                                                                                                                                                                                                                                                                                                                                                                                                                                                                                                                                                                                                                                                           |           |
|---------------------------------|------|--------------------------------------------------------------------------------------------------------------------------------------------------------------------|----------------|-----------------------------------------------------------------------------------------------------------------------------------------------------------------------------------------------------------------------------------------------------------------------------------------------------------------------------------------------------------------------------------------------------------------------------------------------------------------------------------------------------------------------------------------------------------------------------------------------------------------------------------------------------------------------------------------------------------------------------------------------------------|-----------|
| 18                              | 4.05 | Is the taxon likely to disrupt food-web structure/function in aquatic ecosystems if it has invaded or is likely to invade the RA                                   | Yes            | Nystrom, P.; McIntosh, A. R. (2003): Are impacts of an exotic predator on a stream food web influenced by disturbance history? <i>Oecologia</i> (2003) 136:279–288. DOI 10.1007/s00442-003-1250-3                                                                                                                                                                                                                                                                                                                                                                                                                                                                                                                                                         | High      |
| 19                              | 4.06 | Is the taxon likely to exert adverse impacts on ecosystem services in the RA area?                                                                                 | Yes            | Brown trout have been implicated in reducing native fish populations (especially other salmonids) through predation, displacement, food competition and hybridization (Global Invasive Species Database (2020) Species profile: <i>Salmo trutta</i> . Downloaded from <a href="http://www.iucngisd.org/gisd/speciesname/Salmo+trutta">http://www.iucngisd.org/gisd/speciesname/Salmo+trutta</a> on 25-02-2020). Hybridization with maybe more attractive native species <i>Salmo marmoratus</i> (A. Razpet , S. Marić , T. Parapot , V. Nikolić & P. Simonović (2007) Re-evaluation of <i>Salmo</i> data by Gridelli ()—description of stocking, hybridization and repopulation in the River Soča basin. <i>Italian Journal of Zoology</i> . 74:1. 63-70. | High      |
| 20                              | 4.07 | Is it likely that the taxon will host, and/or act as a vector for, recognised pests and infectious agents that are endemic in the RA area?                         | Yes            | Taxon is affected by several bacterial diseases. They are highly sensitive to furunculosis and BKD and may also moderately suffer from yersiniosis, rainbow trout fry syndrome and vibriosis. They also suffer from fungal and parasitic infections (FAO Rome 2005).                                                                                                                                                                                                                                                                                                                                                                                                                                                                                      | High      |
| 21                              | 4.08 | Is it likely that the taxon will host, and/or act as a vector for, recognised pests and infectious agents that are absent from (novel to) the RA area?             | Yes            | Taxon is affected by several bacterial diseases. They are highly sensitive to furunculosis and BKD and may also moderately suffer from yersiniosis, rainbow trout fry syndrome and vibriosis. They also suffer from fungal and parasitic infections (FAO Rome 2005).                                                                                                                                                                                                                                                                                                                                                                                                                                                                                      | High      |
| 22                              | 4.09 | Is it likely that the taxon will achieve a body size that will make it more likely to be released from captivity?                                                  | Yes            | Common length to 72 cm (Froese & Pauly 2019).                                                                                                                                                                                                                                                                                                                                                                                                                                                                                                                                                                                                                                                                                                             | Very high |
| 23                              | 4.10 | Is the taxon capable of sustaining itself in a range of water velocity conditions (e.g. versatile in habitat use)?                                                 | Yes            | Found in streams, ponds, rivers and lakes (Froese & Pauly 2019).                                                                                                                                                                                                                                                                                                                                                                                                                                                                                                                                                                                                                                                                                          | Very high |
| 24                              | 4.11 | Is it likely that the taxon's mode of existence (e.g. excretion of by-products) or behaviours (e.g. feeding) will reduce habitat quality for native taxa?          | No             | Lives in habitats with mostly hard substrate (rock, gravel), prefers clear water (Froese & Pauly 2019).                                                                                                                                                                                                                                                                                                                                                                                                                                                                                                                                                                                                                                                   | High      |
| 25                              | 4.12 | Is the taxon likely to maintain a viable population even when present in low densities (or persisting in adverse conditions by way of a dormant form)?             | No             | No evidence                                                                                                                                                                                                                                                                                                                                                                                                                                                                                                                                                                                                                                                                                                                                               | Low       |
| <b>5. Resource exploitation</b> |      |                                                                                                                                                                    |                |                                                                                                                                                                                                                                                                                                                                                                                                                                                                                                                                                                                                                                                                                                                                                           |           |
| 26                              | 5.01 | Is the taxon likely to consume threatened or protected native taxa in the RA area?                                                                                 | Yes            | Juveniles feed mainly on aquatic and terrestrial insects; adults on mollusks, crustaceans and small fish (Froese & Pauly 2019) which may include threatened or protected taxa.                                                                                                                                                                                                                                                                                                                                                                                                                                                                                                                                                                            | High      |
| 27                              | 5.02 | Is the taxon likely to sequester food resources (including nutrients) to the detriment of native taxa in the RA area?                                              | Not applicable | No sufficient data for calculation.                                                                                                                                                                                                                                                                                                                                                                                                                                                                                                                                                                                                                                                                                                                       | Very high |
| <b>6. Reproduction</b>          |      |                                                                                                                                                                    |                |                                                                                                                                                                                                                                                                                                                                                                                                                                                                                                                                                                                                                                                                                                                                                           |           |
| 28                              | 6.01 | Is the taxon likely to exhibit parental care and/or to reduce age-at-maturity in response to environmental conditions?                                             | No             | Spawning behaviour and life history well known, no such adaptations.                                                                                                                                                                                                                                                                                                                                                                                                                                                                                                                                                                                                                                                                                      | Very high |
| 29                              | 6.02 | Is the taxon likely to produce viable gametes or propagules (in the RA area)?                                                                                      | Yes            | IUCN 2011                                                                                                                                                                                                                                                                                                                                                                                                                                                                                                                                                                                                                                                                                                                                                 | Very high |
| 30                              | 6.03 | Is the taxon likely to hybridise naturally with native taxa?                                                                                                       | Yes            | A. Razpet , S. Marić , T. Parapot , V. Nikolić & P. Simonović (2007) Re-evaluation of <i>Salmo</i> data by Gridelli ()—description of stocking, hybridization and repopulation in the River Soča basin, <i>Italian Journal of Zoology</i> , 74:1, 63-70, DOI:                                                                                                                                                                                                                                                                                                                                                                                                                                                                                             | Very high |
| 31                              | 6.04 | Is the taxon likely to be hermaphroditic or to display asexual reproduction?                                                                                       | No             | Well known                                                                                                                                                                                                                                                                                                                                                                                                                                                                                                                                                                                                                                                                                                                                                | Very high |
| 32                              | 6.05 | Is the taxon dependent on the presence of another taxon (or specific habitat features) to complete its life cycle?                                                 | Yes            | Spawns in rivers and streams with swift current, usually characterized by downward movement of water into gravel (Froese & Pauly 2019).                                                                                                                                                                                                                                                                                                                                                                                                                                                                                                                                                                                                                   | Very high |
| 33                              | 6.06 | Is the taxon known (or likely) to produce a large number of propagules or offspring within a short time span (e.g. < 1 year)?                                      | Yes            | Each female produces about 10.000 eggs (Froese & Pauly 2019).                                                                                                                                                                                                                                                                                                                                                                                                                                                                                                                                                                                                                                                                                             | Very high |
| 34                              | 6.07 | How many time units (days, months, years) does the taxon require to reach the age-at-first-reproduction?                                                           | 1              | FAO Rome 2005                                                                                                                                                                                                                                                                                                                                                                                                                                                                                                                                                                                                                                                                                                                                             | Very high |
| <b>7. Dispersal mechanisms</b>  |      |                                                                                                                                                                    |                |                                                                                                                                                                                                                                                                                                                                                                                                                                                                                                                                                                                                                                                                                                                                                           |           |
| 35                              | 7.01 | How many potential internal vectors/pathways could the taxon use to disperse within the RA area (with suitable vectors/pathways)?                                  | >1             | Restocking - angling purposes Escape from aquaculture                                                                                                                                                                                                                                                                                                                                                                                                                                                                                                                                                                                                                                                                                                     | Medium    |
| 36                              | 7.02 | Will any of these vectors/pathways bring the taxon in close proximity to one or more protected areas (e.g. MCZ, MPA, SSSI)?                                        | Yes            | May happen with restocking, although native stock is used more and more.                                                                                                                                                                                                                                                                                                                                                                                                                                                                                                                                                                                                                                                                                  | Low       |
| 37                              | 7.03 | Does the taxon have a means of actively attaching itself to hard substrata (e.g. ship hulls, pilings, buoys) such that it enhances the likelihood of dispersal?    | No             | No such adaptations.                                                                                                                                                                                                                                                                                                                                                                                                                                                                                                                                                                                                                                                                                                                                      | Very high |
| 38                              | 7.04 | Is natural dispersal of the taxon likely to occur as eggs (for animals) or as propagules (for plants: seeds, spores) in the RA area?                               | Yes            | Eggs covered with sand and gravel (Froese & Pauly 2019) but drift is recorded (Elliott, J.M. 1976: The downstream drifting of eggs of brown trout, <i>Salmo trutta</i> L. <i>Journal of Fish Biology</i> 45-50)                                                                                                                                                                                                                                                                                                                                                                                                                                                                                                                                           | Medium    |
| 39                              | 7.05 | Is natural dispersal of the taxon likely to occur as larvae/juveniles (for animals) or as fragments/seedlings (for plants) in the RA area?                         | Yes            | Downstream drift (Lechner, A., Keckeis, H. & Humphries, P. Patterns and processes in the drift of early developmental stages of fish in rivers: a review. <i>Rev Fish Biol Fisheries</i> 26, 471–489 (2016). <a href="https://doi.org/10.1007/s11160-016-9437-y">https://doi.org/10.1007/s11160-016-9437-y</a> )                                                                                                                                                                                                                                                                                                                                                                                                                                          | High      |
| 40                              | 7.06 | Are older life stages of the taxon likely to migrate in the RA area for reproduction?                                                                              | Yes            | Spawning migrations are common (Froese & Pauly 2019, Kottelat & Freyhof 2007).                                                                                                                                                                                                                                                                                                                                                                                                                                                                                                                                                                                                                                                                            | High      |
| 41                              | 7.07 | Are propagules or eggs of the taxon likely to be dispersed in the RA area by other animals?                                                                        | No             | Eggs in redd covered with sand or gravel (Kottelat & Freyhof 2007).                                                                                                                                                                                                                                                                                                                                                                                                                                                                                                                                                                                                                                                                                       | Very high |
| 42                              | 7.08 | Is dispersal of the taxon along any of the vectors/pathways mentioned in the previous seven questions (35–41; i.e. both unintentional or intentional) likely to be | Yes            | Stocking, escape from aquaculture (personal opinion).                                                                                                                                                                                                                                                                                                                                                                                                                                                                                                                                                                                                                                                                                                     | High      |

|                                |      |                                                                                                                                                                                           |                |                                                                                                                                                                                                                                                                                                                                                                                                                                                       |           |
|--------------------------------|------|-------------------------------------------------------------------------------------------------------------------------------------------------------------------------------------------|----------------|-------------------------------------------------------------------------------------------------------------------------------------------------------------------------------------------------------------------------------------------------------------------------------------------------------------------------------------------------------------------------------------------------------------------------------------------------------|-----------|
| 43                             | 7.09 | Is dispersal of the taxon density dependent?                                                                                                                                              | No             | Migrations occur even without increase in density (Shry Samuel J., McCallum Erin S., Alanärä Anders, Persson Lo, Hellström Gustav (2019): Energetic Status Modulates Facultative Migration in Brown Trout ( <i>Salmo trutta</i> ) Differentially by Age and Spatial Scale. <i>Frontiers in Ecology and Evolution</i> . 7, 411.                                                                                                                        | Low       |
| <b>8. Tolerance attributes</b> |      |                                                                                                                                                                                           |                |                                                                                                                                                                                                                                                                                                                                                                                                                                                       |           |
| 44                             | 8.01 | Is the taxon able to withstand being out of water for extended periods (e.g. minimum of one or more hours) at some stage of its life cycle?                                               | No             | Personal opinion, communication with anglers.                                                                                                                                                                                                                                                                                                                                                                                                         | Very high |
| 45                             | 8.02 | Is the taxon tolerant of a wide range of water quality conditions relevant to that taxon? [In the Justification field, indicate the relevant water quality variable(s) being considered.] | No             | Vulnerable to low oxygen levels and pollution (Freyhof, J. 2011. <i>Salmo trutta</i> . The IUCN Red List of Threatened Species 2011: e.T19861A9050312. <a href="https://dx.doi.org/10.2305/IUCN.UK.2008.RLTS.T19861A9050312.en">https://dx.doi.org/10.2305/IUCN.UK.2008.RLTS.T19861A9050312.en</a> . Downloaded on 25 February 2020).                                                                                                                 | Very high |
| 46                             | 8.03 | Can the taxon be controlled or eradicated in the wild with chemical, biological, or other agents/means?                                                                                   | No             | Not allowed                                                                                                                                                                                                                                                                                                                                                                                                                                           | High      |
| 47                             | 8.04 | Is the taxon likely to tolerate or benefit from environmental/human disturbance?                                                                                                          | No             | Personal opinion                                                                                                                                                                                                                                                                                                                                                                                                                                      | Very high |
| 48                             | 8.05 | Is the taxon able to tolerate salinity levels that are higher or lower than those found in its usual environment?                                                                         | Yes            | Some populations are anadromous (Kottelat & Freyhof 2007, Froese & Pauly 2019).                                                                                                                                                                                                                                                                                                                                                                       | Very high |
| 49                             | 8.06 | Are there effective natural enemies (predators) of the taxon present in the RA                                                                                                            | Yes            | Otters, piscivorous birds (personal communication).                                                                                                                                                                                                                                                                                                                                                                                                   | High      |
| <b>C. Climate change</b>       |      |                                                                                                                                                                                           |                |                                                                                                                                                                                                                                                                                                                                                                                                                                                       |           |
| <b>9. Climate change</b>       |      |                                                                                                                                                                                           |                |                                                                                                                                                                                                                                                                                                                                                                                                                                                       |           |
| 50                             | 9.01 | Under the predicted future climatic conditions, are the risks of entry into the RA area posed by the taxon likely to increase, decrease or not change?                                    | Not applicable | Already present (IUCN 2011)                                                                                                                                                                                                                                                                                                                                                                                                                           | Very high |
| 51                             | 9.02 | Under the predicted future climatic conditions, are the risks of establishment posed by the taxon likely to increase, decrease or not change?                                             | Decrease       | Predicted climatic effects are depletion of populations, increased threats of parasites, increased probability of droughts which has negative effects on populations (Jonsson, B.; Jonsson, N. (2009): A review of the likely effects of climate change on anadromous Atlantic salmon <i>Salmo salar</i> and brown trout <i>Salmo trutta</i> , with particular reference to water temperature and flow. <i>Journal of Fish Biology</i> 75, 2381–2447) | High      |
| 52                             | 9.03 | Under the predicted future climatic conditions, are the risks of dispersal within the RA area posed by the taxon likely to increase, decrease or not change?                              | Decrease       | Predicted climatic effects are depletion of populations, increased threats of parasites, increased probability of droughts which has negative effects on populations (Jonsson, B.; Jonsson, N. (2009): A review of the likely effects of climate change on anadromous Atlantic salmon <i>Salmo salar</i> and brown trout <i>Salmo trutta</i> , with particular reference to water temperature and flow. <i>Journal of Fish Biology</i> 75, 2381–2447) | High      |
| 53                             | 9.04 | Under the predicted future climatic conditions, what is the likely magnitude of future potential impacts on biodiversity and/or ecological integrity/status?                              | Lower          | Predicted climatic effects are depletion of populations, increased threats of parasites, increased probability of droughts which has negative effects on populations (Jonsson, B.; Jonsson, N. (2009): A review of the likely effects of climate change on anadromous Atlantic salmon <i>Salmo salar</i> and brown trout <i>Salmo trutta</i> , with particular reference to water temperature and flow. <i>Journal of Fish Biology</i> 75, 2381–2447) | High      |
| 54                             | 9.05 | Under the predicted future climatic conditions, what is the likely magnitude of future potential impacts on ecosystem structure and/or function?                                          | Lower          | Predicted climatic effects are depletion of populations, increased threats of parasites, increased probability of droughts which has negative effects on populations (Jonsson, B.; Jonsson, N. (2009): A review of the likely effects of climate change on anadromous Atlantic salmon <i>Salmo salar</i> and brown trout <i>Salmo trutta</i> , with particular reference to water temperature and flow. <i>Journal of Fish Biology</i> 75, 2381–2447) | High      |
| 55                             | 9.06 | Under the predicted future climatic conditions, what is the likely magnitude of future potential impacts on ecosystem services/socio-economic factors?                                    | No change      | Both populations of native salmonids and brown trout will decrease equally, so no magnified adverse impact is expected (personal opinion).                                                                                                                                                                                                                                                                                                            | Low       |

| Statistics                                     |             |
|------------------------------------------------|-------------|
| Scores                                         |             |
| <b>BRA</b>                                     | <b>33.0</b> |
| <b>BRA Outcome</b>                             | <b>-</b>    |
| <b>BRA+CCA</b>                                 | <b>25.0</b> |
| <b>BRA+CCA Outcome</b>                         | <b>-</b>    |
| Score partition                                |             |
| <b>A. Biogeography/Historical</b>              | <b>17.0</b> |
| 1. Domestication/Cultivation                   | 2.0         |
| 2. Climate, distribution and introduction risk | 1.0         |
| 3. Invasive elsewhere                          | 14.0        |
| <b>B. Biology/Ecology</b>                      | <b>16.0</b> |
| 4. Undesirable (or persistence) traits         | 6.0         |
| 5. Resource exploitation                       | 5.0         |
| 6. Reproduction                                | 2.0         |
| 7. Dispersal mechanisms                        | 4.0         |
| 8. Tolerance attributes                        | -1.0        |
| <b>C. Climate change</b>                       | <b>-8.0</b> |
| 9. Climate change                              | -8.0        |
| Answered Questions                             |             |
| <b>Total</b>                                   | <b>55</b>   |
| <b>A. Biogeography/Historical</b>              | <b>13</b>   |
| 1. Domestication/Cultivation                   | 3           |
| 2. Climate, distribution and introduction risk | 5           |
| 3. Invasive elsewhere                          | 5           |
| <b>B. Biology/Ecology</b>                      | <b>36</b>   |
| 4. Undesirable (or persistence) traits         | 12          |

|                                              |           |
|----------------------------------------------|-----------|
| 5. Resource exploitation                     | 2         |
| 6. Reproduction                              | 7         |
| 7. Dispersal mechanisms                      | 9         |
| 8. Tolerance attributes                      | 6         |
| <b>C. Climate change</b>                     | <b>6</b>  |
| 9. Climate change                            | 6         |
| <b>Sectors affected</b>                      |           |
| <b>Commercial</b>                            | <b>14</b> |
| <b>Environmental</b>                         | <b>8</b>  |
| <b>Species or population nuisance traits</b> | <b>7</b>  |

|                   |             |
|-------------------|-------------|
| <b>Thresholds</b> |             |
| <b>BRA</b>        | -           |
| <b>BRA+CCA</b>    | -           |
| <b>Confidence</b> |             |
| <b>BRA+CCA</b>    | <b>0.80</b> |
| <b>BRA</b>        | <b>0.82</b> |
| <b>CCA</b>        | <b>0.71</b> |

|                            |  |
|----------------------------|--|
| <b>Date and Time</b>       |  |
| <b>13/05/2021 20:50:43</b> |  |



## AS-ISK v2

| Taxon and Assessor details         |                                         |
|------------------------------------|-----------------------------------------|
| Category                           | Fishes and Lampreys (freshwater)        |
| Taxon name                         | <i>Salmo trutta</i>                     |
| Common name                        | brown trout                             |
| Assessor                           | Tamara Kanjuh                           |
| Risk screening context             |                                         |
| Reason and socio-economic benefits |                                         |
| Risk assessment area               | Danube & Adriatic basins BA, HR, ME, RS |
| Taxonomy                           |                                         |
| Native range                       |                                         |
| Introduced range                   |                                         |
| URL                                |                                         |

|                                                |      | Response                                                                                                                                                                | Justification (references and/or other information) | Confidence                                                                                                                                                                                                                                                                                                                                                                                                                                       |           |
|------------------------------------------------|------|-------------------------------------------------------------------------------------------------------------------------------------------------------------------------|-----------------------------------------------------|--------------------------------------------------------------------------------------------------------------------------------------------------------------------------------------------------------------------------------------------------------------------------------------------------------------------------------------------------------------------------------------------------------------------------------------------------|-----------|
| A. Biogeography/Historical                     |      |                                                                                                                                                                         |                                                     |                                                                                                                                                                                                                                                                                                                                                                                                                                                  |           |
| 1. Domestication/Cultivation                   |      |                                                                                                                                                                         |                                                     |                                                                                                                                                                                                                                                                                                                                                                                                                                                  |           |
| 1                                              | 1.01 | Has the taxon been the subject of domestication (or cultivation) for at least 20 generations?                                                                           | Yes                                                 | The stocking of nonindigenous brown trout has been very extensive in Central Europe. It was initiated during the Austrian-Hungarian Empire in the 19th Century. For example, in 1862, eggs of brown trout were transported from Salzburg (Danube basin) to Nedošin (North Sea basin), where the stock was set up ( <a href="http://www.vackuvchovpstruhu.estranky.cz">http://www.vackuvchovpstruhu.estranky.cz</a> ) (Kohout et al., 2017).      | Very high |
| 2                                              | 1.02 | Is the taxon harvested in the wild and likely to be sold or used in its live form?                                                                                      | Yes                                                 | Brown trout is important for commercial fisheries and the species is a very popular target for angling. In several European countries it is one of the most important species for sport fisheries (Laikre et al., 2017).                                                                                                                                                                                                                         | Very high |
| 3                                              | 1.03 | Does the taxon have invasive races, varieties, sub-taxa or congeners?                                                                                                   | Yes                                                 | Brown trout (which includes almost all of its morphs and phylogenetic lineages) have been introduced into streams, rivers, reservoirs, and lakes and have been able to form self-sustaining populations in all of these environments (Belica, 2007).                                                                                                                                                                                             | Very high |
| 2. Climate, distribution and introduction risk |      |                                                                                                                                                                         |                                                     |                                                                                                                                                                                                                                                                                                                                                                                                                                                  |           |
| 4                                              | 2.01 | How similar are the climatic conditions of the Risk Assessment (RA) area and the taxon's native range?                                                                  | Low                                                 | Dfa, Dfb (Köppen–Geiger climate classification system)                                                                                                                                                                                                                                                                                                                                                                                           | Medium    |
| 5                                              | 2.02 | What is the quality of the climate matching data?                                                                                                                       | High                                                | Köppen–Geiger climate classification system                                                                                                                                                                                                                                                                                                                                                                                                      | High      |
| 6                                              | 2.03 | Is the taxon already present outside of captivity in the RA area?                                                                                                       | Yes                                                 | Una River (Škraba et al., 2017), Kupčina River (Kanjuh et al., 2020)                                                                                                                                                                                                                                                                                                                                                                             | High      |
| 7                                              | 2.04 | How many potential vectors could the taxon use to enter in the RA area?                                                                                                 | >1                                                  | Taxon has been traditionally introduced via stocking programs. Fishfarm brown trout that are often formed from allochthonous or hybrid fish stocks are often deliberately released into natural waters and mixed with indigenous populations (Allendorf et al., 2001). Random restocking with farmed trout of non-native origin (Taggart&Ferguson, 1986). Bucket biologists have also been known to further propagate invasions (Burrill, 2014). | High      |
| 8                                              | 2.05 | Is the taxon currently found in close proximity to, and likely to enter into, the RA area in the near future (e.g. unintentional and intentional introductions)?        | Yes                                                 | The presence of taxa has already been detected in the RA area (Simonović et al., 2017).                                                                                                                                                                                                                                                                                                                                                          | High      |
| 3. Invasive elsewhere                          |      |                                                                                                                                                                         |                                                     |                                                                                                                                                                                                                                                                                                                                                                                                                                                  |           |
| 9                                              | 3.01 | Has the taxon become naturalised (established viable populations) outside its native range?                                                                             | Yes                                                 | The rapid naturalization of brown trout and their success in forming selfsustaining populations throughout North America have been attributed in part to the increased genetic diversity of the mixed forms that were introduced (Behnke 2002).                                                                                                                                                                                                  | High      |
| 10                                             | 3.02 | In the taxon's introduced range, are there known adverse impacts to wild stocks or commercial taxa?                                                                     | Yes                                                 | The taxon hybridizes with native Danube trout, leading to the loss of intraspecific variability, following the introduction of alien strains and a change in genetic composition of native brown trout stock of Danube lineage (Simonović et al., 2014).                                                                                                                                                                                         | Very high |
| 11                                             | 3.03 | In the taxon's introduced range, are there known adverse impacts to aquaculture?                                                                                        | No                                                  | No information found.                                                                                                                                                                                                                                                                                                                                                                                                                            | Low       |
| 12                                             | 3.04 | In the taxon's introduced range, are there known adverse impacts to ecosystem                                                                                           | No                                                  | No information found.                                                                                                                                                                                                                                                                                                                                                                                                                            | Low       |
| 13                                             | 3.05 | In the taxon's introduced range, are there known adverse socio-economic impacts?                                                                                        | No                                                  | No information found.                                                                                                                                                                                                                                                                                                                                                                                                                            | Low       |
| B. Biology/Ecology                             |      |                                                                                                                                                                         |                                                     |                                                                                                                                                                                                                                                                                                                                                                                                                                                  |           |
| 4. Undesirable (or persistence) traits         |      |                                                                                                                                                                         |                                                     |                                                                                                                                                                                                                                                                                                                                                                                                                                                  |           |
| 14                                             | 4.01 | Is it likely that the taxon will be poisonous or pose other risks to human health?                                                                                      | Yes                                                 | Potential pests ( <a href="https://www.fishbase.se/summary/Salmo-trutta.html">https://www.fishbase.se/summary/Salmo-trutta.html</a> )                                                                                                                                                                                                                                                                                                            | High      |
| 15                                             | 4.02 | Is it likely that the taxon will smother one or more native taxa (that are not threatened or protected)?                                                                | Yes                                                 | The taxon can suppress the native phylogenetic lineage (Apostolidis et al., 1997; Piria et al., 2019).                                                                                                                                                                                                                                                                                                                                           | Very high |
| 16                                             | 4.03 | Are there any threatened or protected taxa that the non-native taxon would parasitise in the RA area?                                                                   | No                                                  | No information found.                                                                                                                                                                                                                                                                                                                                                                                                                            | Low       |
| 17                                             | 4.04 | Is the taxon adaptable in terms of climatic and other environmental conditions, thus enhancing its potential persistence if it has invaded or could invade the RA area? | No                                                  | The taxon is sensitive to changes in habitat conditions, so in the first place the water temperature must be optimal (Burrill, 2014).                                                                                                                                                                                                                                                                                                            | High      |
| 18                                             | 4.05 | Is the taxon likely to disrupt food-web structure/function in aquatic ecosystems if it has invaded or is likely to invade the RA                                        | No                                                  | No information found.                                                                                                                                                                                                                                                                                                                                                                                                                            | Low       |
| 19                                             | 4.06 | Is the taxon likely to exert adverse impacts on ecosystem services in the RA area?                                                                                      | Yes                                                 | Such difference in feeding strategy between brown trout of different lineages implies that brown trout of the AT lineage could be more attractive for fly fishing (Piria et al., 2019).                                                                                                                                                                                                                                                          | High      |
| 20                                             | 4.07 | Is it likely that the taxon will host, and/or act as a vector for, recognised pests and infectious agents that are endemic in the RA                                    | No                                                  | No information found.                                                                                                                                                                                                                                                                                                                                                                                                                            | Low       |

|                                 |      |                                                                                                                                                                              |     |                                                                                                                                                                                                                                                                                                                                                                   |           |
|---------------------------------|------|------------------------------------------------------------------------------------------------------------------------------------------------------------------------------|-----|-------------------------------------------------------------------------------------------------------------------------------------------------------------------------------------------------------------------------------------------------------------------------------------------------------------------------------------------------------------------|-----------|
| 21                              | 4.08 | Is it likely that the taxon will host, and/or act as a vector for, recognised pests and infectious agents that are absent from (novel to) the RA area?                       | Yes | No information found.                                                                                                                                                                                                                                                                                                                                             | Low       |
| 22                              | 4.09 | Is it likely that the taxon will achieve a body size that will make it more likely to be released from captivity?                                                            | No  | No information found.                                                                                                                                                                                                                                                                                                                                             | Low       |
| 23                              | 4.10 | Is the taxon capable of sustaining itself in a range of water velocity conditions (e.g. versatile in habitat use)?                                                           | No  | The taxon is sensitive to changes in habitat conditions (Burrell, 2014).                                                                                                                                                                                                                                                                                          | High      |
| 24                              | 4.11 | Is it likely that the taxon's mode of existence (e.g. excretion of by-products) or behaviours (e.g. feeding) will reduce habitat quality for native taxa?                    | Yes | The diet of the taxon may affect food availability (Piria et al., 2019).                                                                                                                                                                                                                                                                                          | Medium    |
| 25                              | 4.12 | Is the taxon likely to maintain a viable population even when present in low densities (or persisting in adverse conditions by way of a dormant form)?                       | No  | No information found.                                                                                                                                                                                                                                                                                                                                             | Low       |
| <b>5. Resource exploitation</b> |      |                                                                                                                                                                              |     |                                                                                                                                                                                                                                                                                                                                                                   |           |
| 26                              | 5.01 | Is the taxon likely to consume threatened or protected native taxa in the RA area?                                                                                           | No  | No information found.                                                                                                                                                                                                                                                                                                                                             | Low       |
| 27                              | 5.02 | Is the taxon likely to sequester food resources (including nutrients) to the detriment of native taxa in the RA area?                                                        | Yes | Due to their diet, they can affect the availability of prey (Piria et al., 2019).                                                                                                                                                                                                                                                                                 | High      |
| <b>6. Reproduction</b>          |      |                                                                                                                                                                              |     |                                                                                                                                                                                                                                                                                                                                                                   |           |
| 28                              | 6.01 | Is the taxon likely to exhibit parental care and/or to reduce age-at-maturity in response to environmental conditions?                                                       | Yes | Parental care is certainly part of the taxon's life cycle ( <a href="https://animaldiversity.org/accounts/Salmo_trutta/">https://animaldiversity.org/accounts/Salmo_trutta/</a> ).                                                                                                                                                                                | High      |
| 29                              | 6.02 | Is the taxon likely to produce viable gametes or propagules (in the RA area)?                                                                                                | Yes | Reproduction is uninterrupted, as well as hybridization with native taxa (Marić et al., 2006; Simonović et al., 2017; Kanjuh et al., 2016; Škraba et al., 2017). Reproduction is uninterrupted, as well as hybridization with native taxa (Marić et al., 2006; Simonović et al., 2017; Kanjuh et al., 2020)                                                       | Very high |
| 30                              | 6.03 | Is the taxon likely to hybridise naturally with native taxa?                                                                                                                 | Yes | Restriction fragment length polymorphism, RFLP analysis showed that hybridization with the native Da lineage occurs (Tošić et al. 2016; Škraba et al., 2017). Reproduction is uninterrupted, as well as hybridization with native taxa (Marić et al., 2006; Simonović et al., 2017; Kanjuh et al., 2020)                                                          | Very high |
| 31                              | 6.04 | Is the taxon likely to be hermaphroditic or to display asexual reproduction?                                                                                                 | No  | No information found.                                                                                                                                                                                                                                                                                                                                             | Low       |
| 32                              | 6.05 | Is the taxon dependent on the presence of another taxon (or specific habitat features) to complete its life cycle?                                                           | Yes | The taxon requires a gravelly spawning ground most often in fast waters (Simonović, 2001; Klemetsen, 1967; Sneider, 2000).                                                                                                                                                                                                                                        | High      |
| 33                              | 6.06 | Is the taxon known (or likely) to produce a large number of propagules or offspring within a short time span (e.g. < 1 year)?                                                | Yes | The female lays from 500 to 30,000 eggs (Simonović, 2001).                                                                                                                                                                                                                                                                                                        | High      |
| 34                              | 6.07 | How many time units (days, months, years) does the taxon require to reach the age-at-first-reproduction?                                                                     | 2   | The taxon becomes fully mature after 2-3 years (Somme 1941).                                                                                                                                                                                                                                                                                                      | High      |
| <b>7. Dispersal mechanisms</b>  |      |                                                                                                                                                                              |     |                                                                                                                                                                                                                                                                                                                                                                   |           |
| 35                              | 7.01 | How many potential internal vectors/pathways could the taxon use to disperse within the RA area (with suitable habitats nearby)?                                             | >1  | Fishfarm specimens that are often formed from allochthonous or hybrid fish stocks are often deliberately released into natural waters and mixed with indigenous populations. Another pathway is random restocking in order to increase the number of fishery exploited populations (Allendorf et al., 2001). Introduction for sport fishing (Piria et al., 2017). | High      |
| 36                              | 7.02 | Will any of these vectors/pathways bring the taxon in close proximity to one or more protected areas (e.g. MCZ, MPA, SSSI)?                                                  | Yes | Đerdap National Park (Tošić et al., 2016).                                                                                                                                                                                                                                                                                                                        | High      |
| 37                              | 7.03 | Does the taxon have a means of actively attaching itself to hard substrata (e.g. ship hulls, pilings, buoys) such that it enhances the likelihood of dispersal?              | No  | No information found.                                                                                                                                                                                                                                                                                                                                             | Low       |
| 38                              | 7.04 | Is natural dispersal of the taxon likely to occur as eggs (for animals) or as propagules (for plants: seeds, spores) in the RA area?                                         | No  | Natural spread of taxa by watercourse as juvenile.                                                                                                                                                                                                                                                                                                                | Medium    |
| 39                              | 7.05 | Is natural dispersal of the taxon likely to occur as larvae/juveniles (for animals) or as fragments/seedlings (for plants) in the RA area?                                   | No  | Natural spread of taxa by watercourse as juvenile.                                                                                                                                                                                                                                                                                                                | Medium    |
| 40                              | 7.06 | Are older life stages of the taxon likely to migrate in the RA area for reproduction?                                                                                        | Yes | During the pre-spawning period, in early summer, brown trout were found to travel an average of 348 meters a day. During spawning they moved an average of 160 meters (Burrill, 2014).                                                                                                                                                                            | High      |
| 41                              | 7.07 | Are propagules or eggs of the taxon likely to be dispersed in the RA area by other animals?                                                                                  | No  | No information found.                                                                                                                                                                                                                                                                                                                                             | Low       |
| 42                              | 7.08 | Is dispersal of the taxon along any of the vectors/pathways mentioned in the previous seven questions (35–41; i.e. both unintentional or intentional) likely to be           | Yes | Escape from fish farm, introduction for sport fishing.                                                                                                                                                                                                                                                                                                            | Low       |
| 43                              | 7.09 | Is dispersal of the taxon density dependent?                                                                                                                                 | No  | No information found.                                                                                                                                                                                                                                                                                                                                             | Low       |
| <b>8. Tolerance attributes</b>  |      |                                                                                                                                                                              |     |                                                                                                                                                                                                                                                                                                                                                                   |           |
| 44                              | 8.01 | Is the taxon able to withstand being out of water for extended periods (e.g. minimum of one or more hours) at some stage of its life cycle?                                  | No  | The taxon cannot survive for a long period of time out of the water.                                                                                                                                                                                                                                                                                              | Low       |
| 45                              | 8.02 | Is the taxon tolerant of a wide range of water quality conditions relevant to that taxon? [In the Justification field, indicate the relevant water quality variable(s) being | No  | The taxon is very sensitive to changes in habitat conditions, especially temperature and oxygen saturation.                                                                                                                                                                                                                                                       | Low       |
| 46                              | 8.03 | Can the taxon be controlled or eradicated in the wild with chemical, biological, or other agents/means?                                                                      | No  | Management proposals are still under development.                                                                                                                                                                                                                                                                                                                 | Medium    |

|                          |      |                                                                                                                                                              |           |                                                                                                                                                                                                                                                                                               |        |
|--------------------------|------|--------------------------------------------------------------------------------------------------------------------------------------------------------------|-----------|-----------------------------------------------------------------------------------------------------------------------------------------------------------------------------------------------------------------------------------------------------------------------------------------------|--------|
| 47                       | 8.04 | Is the taxon likely to tolerate or benefit from environmental/human disturbance?                                                                             | Yes       | Anthropogenic impact is the most important factor endangering the taxon, both directly under the influence of fishing and restocking, and indirectly through the destruction of habitats that it inhabits (Crisp, 2000).                                                                      | High   |
| 48                       | 8.05 | Is the taxon able to tolerate salinity levels that are higher or lower than those found in its usual environment?                                            | Yes       | The brown trout is well-known for its highly flexible life-cycle (Hansen, 2002).                                                                                                                                                                                                              | Medium |
| 49                       | 8.06 | Are there effective natural enemies (predators) of the taxon present in the RA                                                                               | Yes       | Humans, otters ( <a href="https://animaldiversity.org/accounts/Salmo_trutta/">https://animaldiversity.org/accounts/Salmo_trutta/</a> ).                                                                                                                                                       | Medium |
| <b>C. Climate change</b> |      |                                                                                                                                                              |           |                                                                                                                                                                                                                                                                                               |        |
| <b>9. Climate change</b> |      |                                                                                                                                                              |           |                                                                                                                                                                                                                                                                                               |        |
| 50                       | 9.01 | Under the predicted future climatic conditions, are the risks of entry into the RA area posed by the taxon likely to increase, decrease or not change?       | Decrease  | The egg stage would be clearly the most vulnerable life stage to any increase in temperature as a result of climate change. In a longterm study of a juvenile anadromous S. trutta population, summer drought led to increased mortality, especially for 1+ year fish (Elliott et al., 1997). | Medium |
| 51                       | 9.02 | Under the predicted future climatic conditions, are the risks of establishment posed by the taxon likely to increase, decrease or not change?                | Decrease  | The egg stage would be clearly the most vulnerable life stage to any increase in temperature as a result of climate change. In a longterm study of a juvenile anadromous S. trutta population, summer drought led to increased mortality, especially for 1+ year fish (Elliott et al., 1997). | Medium |
| 52                       | 9.03 | Under the predicted future climatic conditions, are the risks of dispersal within the RA area posed by the taxon likely to increase, decrease or not change? | Decrease  | The egg stage would be clearly the most vulnerable life stage to any increase in temperature as a result of climate change. In a longterm study of a juvenile anadromous S. trutta population, summer drought led to increased mortality, especially for 1+ year fish (Elliott et al., 1997). | Medium |
| 53                       | 9.04 | Under the predicted future climatic conditions, what is the likely magnitude of future potential impacts on biodiversity and/or ecological integrity/status? | No change | The egg stage would be clearly the most vulnerable life stage to any increase in temperature as a result of climate change. In a longterm study of a juvenile anadromous S. trutta population, summer drought led to increased mortality, especially for 1+ year fish (Elliott et al., 1997). | Medium |
| 54                       | 9.05 | Under the predicted future climatic conditions, what is the likely magnitude of future potential impacts on ecosystem structure and/or function?             | No change | The egg stage would be clearly the most vulnerable life stage to any increase in temperature as a result of climate change. In a longterm study of a juvenile anadromous S. trutta population, summer drought led to increased mortality, especially for 1+ year fish (Elliott et al., 1997). | Medium |
| 55                       | 9.06 | Under the predicted future climatic conditions, what is the likely magnitude of future potential impacts on ecosystem services/socio-economic factors?       | No change | The egg stage would be clearly the most vulnerable life stage to any increase in temperature as a result of climate change. In a longterm study of a juvenile anadromous S. trutta population, summer drought led to increased mortality, especially for 1+ year fish (Elliott et al., 1997). | Medium |

| Statistics                                     |             |
|------------------------------------------------|-------------|
| Scores                                         |             |
| <b>BRA</b>                                     | <b>18.5</b> |
| <b>BRA Outcome</b>                             | <b>-</b>    |
| <b>BRA+CCA</b>                                 | <b>12.5</b> |
| <b>BRA+CCA Outcome</b>                         | <b>-</b>    |
| Score partition                                |             |
| <b>A. Biogeography/Historical</b>              | <b>7.5</b>  |
| 1. Domestication/Cultivation                   | 4.0         |
| 2. Climate, distribution and introduction risk | 2.0         |
| 3. Invasive elsewhere                          | 1.5         |
| <b>B. Biology/Ecology</b>                      | <b>11.0</b> |
| 4. Undesirable (or persistence) traits         | 4.0         |
| 5. Resource exploitation                       | 2.0         |
| 6. Reproduction                                | 2.0         |
| 7. Dispersal mechanisms                        | 0.0         |
| 8. Tolerance attributes                        | 3.0         |
| <b>C. Climate change</b>                       | <b>-6.0</b> |
| 9. Climate change                              | -6.0        |
| Answered Questions                             |             |
| <b>Total</b>                                   | <b>55</b>   |
| <b>A. Biogeography/Historical</b>              | <b>13</b>   |
| 1. Domestication/Cultivation                   | 3           |
| 2. Climate, distribution and introduction risk | 5           |
| 3. Invasive elsewhere                          | 5           |
| <b>B. Biology/Ecology</b>                      | <b>36</b>   |
| 4. Undesirable (or persistence) traits         | 12          |
| 5. Resource exploitation                       | 2           |
| 6. Reproduction                                | 7           |
| 7. Dispersal mechanisms                        | 9           |
| 8. Tolerance attributes                        | 6           |
| <b>C. Climate change</b>                       | <b>6</b>    |
| 9. Climate change                              | 6           |
| Sectors affected                               |             |
| <b>Commercial</b>                              | <b>8</b>    |
| <b>Environmental</b>                           | <b>3</b>    |
| <b>Species or population nuisance traits</b>   | <b>7</b>    |

| Thresholds     |             |
|----------------|-------------|
| <b>BRA</b>     | <b>-</b>    |
| <b>BRA+CCA</b> | <b>-</b>    |
| Confidence     |             |
| <b>BRA+CCA</b> | <b>0.57</b> |
| <b>BRA</b>     | <b>0.58</b> |
| <b>CCA</b>     | <b>0.50</b> |

| Date and Time       |  |
|---------------------|--|
| 28/05/2021 09:06:41 |  |

## AS-ISK v2

| Taxon and Assessor details         |                                         |
|------------------------------------|-----------------------------------------|
| Category                           | Fishes and Lampreys (freshwater)        |
| Taxon name                         | <i>Salmo trutta</i>                     |
| Common name                        | brown trout                             |
| Assessor                           | Tena Radocaj                            |
| Risk screening context             |                                         |
| Reason and socio-economic benefits |                                         |
| Risk assessment area               | Danube & Adriatic basins BA, HR, ME, RS |
| Taxonomy                           |                                         |
| Native range                       |                                         |
| Introduced range                   |                                         |
| URL                                |                                         |

|                                                       |      |                                                                                                                                                                         | Response       | Justification (references and/or other information)                                                                                                                                                                                                                                                                                                                                                                                                                                                                                                                                                                                                                                                                                           | Confidence |
|-------------------------------------------------------|------|-------------------------------------------------------------------------------------------------------------------------------------------------------------------------|----------------|-----------------------------------------------------------------------------------------------------------------------------------------------------------------------------------------------------------------------------------------------------------------------------------------------------------------------------------------------------------------------------------------------------------------------------------------------------------------------------------------------------------------------------------------------------------------------------------------------------------------------------------------------------------------------------------------------------------------------------------------------|------------|
| <b>A. Biogeography / Historical</b>                   |      |                                                                                                                                                                         |                |                                                                                                                                                                                                                                                                                                                                                                                                                                                                                                                                                                                                                                                                                                                                               |            |
| <b>1. Domestication/Cultivation</b>                   |      |                                                                                                                                                                         |                |                                                                                                                                                                                                                                                                                                                                                                                                                                                                                                                                                                                                                                                                                                                                               |            |
| 1                                                     | 1.01 | Has the taxon been the subject of domestication (or cultivation) for at least 20 generations?                                                                           | Yes            | For angling purpose in almost all karstic rivers in mediteranean area. Together with atlantic form                                                                                                                                                                                                                                                                                                                                                                                                                                                                                                                                                                                                                                            | Very high  |
| 2                                                     | 1.02 | Is the taxon harvested in the wild and likely to be sold or used in its live form?                                                                                      | Yes            | primarily bred and stocked for recreational fishing (Global Invasive Species Database (2020) Species profile: <i>Salmo trutta</i> . Downloaded from <a href="http://www.iucnqisd.org/qisd/species.php?sc=78">http://www.iucnqisd.org/qisd/species.php?sc=78</a> on 06-03-2020.)                                                                                                                                                                                                                                                                                                                                                                                                                                                               | Medium     |
| 3                                                     | 1.03 | Does the taxon have invasive races, varieties, sub-taxa or congeners?                                                                                                   | Yes            | atlantic haplotip                                                                                                                                                                                                                                                                                                                                                                                                                                                                                                                                                                                                                                                                                                                             | Very high  |
| <b>2. Climate, distribution and introduction risk</b> |      |                                                                                                                                                                         |                |                                                                                                                                                                                                                                                                                                                                                                                                                                                                                                                                                                                                                                                                                                                                               |            |
| 4                                                     | 2.01 | How similar are the climatic conditions of the Risk Assessment (RA) area and the taxon's native range?                                                                  | High           | The similarity between climatic conditions RA area and native range is high. I use climatch.                                                                                                                                                                                                                                                                                                                                                                                                                                                                                                                                                                                                                                                  | Very high  |
| 5                                                     | 2.02 | What is the quality of the climate matching data?                                                                                                                       | High           | The quality of the climate matching data is high.                                                                                                                                                                                                                                                                                                                                                                                                                                                                                                                                                                                                                                                                                             | Very high  |
| 6                                                     | 2.03 | Is the taxon already present outside of captivity in the RA area?                                                                                                       | Yes            | <i>Salmo trutta</i> is present outside in captivity in the RA area.                                                                                                                                                                                                                                                                                                                                                                                                                                                                                                                                                                                                                                                                           | Very high  |
| 7                                                     | 2.04 | How many potential vectors could the taxon use to enter in the RA area?                                                                                                 | None           | <i>S. trutta</i> is present in RA area                                                                                                                                                                                                                                                                                                                                                                                                                                                                                                                                                                                                                                                                                                        | Medium     |
| 8                                                     | 2.05 | Is the taxon currently found in close proximity to, and likely to enter into, the RA area in the near future (e.g. unintentional and intentional introductions)?        | Not applicable | <i>S. trutta</i> is present in RA area                                                                                                                                                                                                                                                                                                                                                                                                                                                                                                                                                                                                                                                                                                        | Very high  |
| <b>3. Invasive elsewhere</b>                          |      |                                                                                                                                                                         |                |                                                                                                                                                                                                                                                                                                                                                                                                                                                                                                                                                                                                                                                                                                                                               |            |
| 9                                                     | 3.01 | Has the taxon become naturalised (established viable populations) outside its native range?                                                                             | Yes            | The species is found in Iceland and on the northwest coast of Europe, along the Mediterranean and south to India. <i>S. trutta</i> has been introduced to appropriate streams all over the world (Animal Diversity Web, 2004) and today is found in rivers, lakes and coastal areas (Nova Scotia, 2004). (CABI)                                                                                                                                                                                                                                                                                                                                                                                                                               | Very high  |
| 10                                                    | 3.02 | In the taxon's introduced range, are there known adverse impacts to wild stocks or commercial taxa?                                                                     | Yes            | They compete with native trout and other fish species, but they are not known to have been the cause of any species' extinction (Animal Diversity Web, 2004). (CABI)                                                                                                                                                                                                                                                                                                                                                                                                                                                                                                                                                                          | Medium     |
| 11                                                    | 3.03 | In the taxon's introduced range, are there known adverse impacts to aquaculture?                                                                                        | No             | no data                                                                                                                                                                                                                                                                                                                                                                                                                                                                                                                                                                                                                                                                                                                                       | Low        |
| 12                                                    | 3.04 | In the taxon's introduced range, are there known adverse impacts to ecosystem services?                                                                                 | Yes            | <i>Salmo trutta</i> has been implicated in reducing native fish populations (especially other salmonids) through predation, displacement, and food competition (Taylor et al., 1984). Another negative effect is their contribution to the lamprey population in many rivers. The increased lamprey populations since <i>S. trutta</i> were introduced have been considered as a negative impact on biodiversity (Animal Diversity Web, 2004). (CABI)                                                                                                                                                                                                                                                                                         | Medium     |
| 13                                                    | 3.05 | In the taxon's introduced range, are there known adverse socio-economic impacts?                                                                                        | No             | No data, personal opinion                                                                                                                                                                                                                                                                                                                                                                                                                                                                                                                                                                                                                                                                                                                     | Low        |
| <b>B. Biology / Ecology</b>                           |      |                                                                                                                                                                         |                |                                                                                                                                                                                                                                                                                                                                                                                                                                                                                                                                                                                                                                                                                                                                               |            |
| <b>4. Undesirable (or persistence) traits</b>         |      |                                                                                                                                                                         |                |                                                                                                                                                                                                                                                                                                                                                                                                                                                                                                                                                                                                                                                                                                                                               |            |
| 14                                                    | 4.01 | Is it likely that the taxon will be poisonous or pose other risks to human health?                                                                                      | No             | no                                                                                                                                                                                                                                                                                                                                                                                                                                                                                                                                                                                                                                                                                                                                            | Very high  |
| 15                                                    | 4.02 | Is it likely that the taxon will smother one or more native taxa (that are not threatened or protected)?                                                                | Yes            | Where brown trout have been introduced, they have had detrimental impacts on native fauna, and in many systems in North America, they have displaced or completely replaced native salmonids (Behnke 2002) Where brown trout have been introduced, they have had detrimental impacts on native fauna, and in many systems in North America, they have displaced or completely replaced native salmonids (Behnke 2002). 8Belica, L. (2007, April 26). Brown Trout ( <i>Salmo trutta</i> ): a technical conservation assessment. [Online]. USDA Forest Service, Rocky Mountain Region. Available: <a href="http://www.fs.fed.us/r2/projects/scn/assessments/browntrout.pdf">http://www.fs.fed.us/r2/projects/scn/assessments/browntrout.pdf</a> | High       |
| 16                                                    | 4.03 | Are there any threatened or protected taxa that the non-native taxon would parasitise in the RA area?                                                                   | No             | no                                                                                                                                                                                                                                                                                                                                                                                                                                                                                                                                                                                                                                                                                                                                            | Very high  |
| 17                                                    | 4.04 | Is the taxon adaptable in terms of climatic and other environmental conditions, thus enhancing its potential persistence if it has invaded or could invade the RA area? | Yes            | Brown trout are well adapted for many environments, as has been demonstrated by their successful introduction to suitable cold-water systems worldwide. (Belica, L. (2007, April 26). Brown Trout ( <i>Salmo trutta</i> ): a technical conservation assessment. [Online]. USDA Forest Service, Rocky Mountain Region. Available: <a href="http://www.fs.fed.us/r2/projects/scp/assessments/browntrout.pdf">http://www.fs.fed.us/r2/projects/scp/assessments/browntrout.pdf</a> [date of access]. )                                                                                                                                                                                                                                            | High       |
| 18                                                    | 4.05 | Is the taxon likely to disrupt food-web structure/function in aquatic ecosystems if it has invaded or is likely to invade the RA area?                                  | Yes            | It may have a similar impact in the RA area (no data- personal opinion), as this species is found in many locations, encountering other native and introduced trout. In some places, brown trout populations have outgrown indigenous fish populations so rapidly that native fish have been forced out (Behnke 2002).                                                                                                                                                                                                                                                                                                                                                                                                                        | Low        |

|                                 |      |                                                                                                                                                                 |                |                                                                                                                                                                                                                                                                                                                                                                                                                                                                                                                                                                                                                                                                                                                                                                                       |           |
|---------------------------------|------|-----------------------------------------------------------------------------------------------------------------------------------------------------------------|----------------|---------------------------------------------------------------------------------------------------------------------------------------------------------------------------------------------------------------------------------------------------------------------------------------------------------------------------------------------------------------------------------------------------------------------------------------------------------------------------------------------------------------------------------------------------------------------------------------------------------------------------------------------------------------------------------------------------------------------------------------------------------------------------------------|-----------|
| 19                              | 4.06 | Is the taxon likely to exert adverse impacts on ecosystem services in the RA area?                                                                              | No             | No impact on ecosystem services in RA area.                                                                                                                                                                                                                                                                                                                                                                                                                                                                                                                                                                                                                                                                                                                                           | Low       |
| 20                              | 4.07 | Is it likely that the taxon will host, and/or act as a vector for, recognised pests and infectious agents that are endemic in the RA area?                      | Yes            | Yes, the taxon may be a host or vector of known pests and infectious agents endemic to RA area. Because in every area exist infectious agents and pests.                                                                                                                                                                                                                                                                                                                                                                                                                                                                                                                                                                                                                              | Low       |
| 21                              | 4.08 | Is it likely that the taxon will host, and/or act as a vector for, recognised pests and infectious agents that are absent from (novel to) the RA area?          | Yes            | Some diseases that affect brown trout include a range of gill ectoparasites (documented by Schisler et al. 1999), pleistophora and epitheliocytis parasites (as reported by Kershner 1995 and cited by Schrank 2004), and bacterial diseases such as furunculosis (caused by <i>Aeromonas salmonicida</i> ), enteric redmouth (caused by <i>Yersinia ruckeri</i> ), and bacterial kidney disease (caused by <i>Renibacterium salmoninarum</i> ) (Mitchum 1982). Belica, L. (2007, April 26). Brown Trout ( <i>Salmo trutta</i> ): a technical conservation assessment. [Online]. USDA Forest Service, Rocky Mountain Region. Available: <a href="http://www.fs.fed.us/r2/projects/scp/assessments/browntrout.pdf">http://www.fs.fed.us/r2/projects/scp/assessments/browntrout.pdf</a> | Medium    |
| 22                              | 4.09 | Is it likely that the taxon will achieve a body size that will make it more likely to be released from captivity?                                               | Yes            | It can grow to a standard length of 140 cm (Muus and Dahlström, 1967) (CABI)                                                                                                                                                                                                                                                                                                                                                                                                                                                                                                                                                                                                                                                                                                          | Very high |
| 23                              | 4.10 | Is the taxon capable of sustaining itself in a range of water velocity conditions (e.g. versatile in habitat use)?                                              | Yes            | approximately 8 cm per s [0.26 ft. per s] and (up to 60 to 70 cm per s [2.0 to 2.3 ft. per s])                                                                                                                                                                                                                                                                                                                                                                                                                                                                                                                                                                                                                                                                                        | Medium    |
| 24                              | 4.11 | Is it likely that the taxon's mode of existence (e.g. excretion of by-products) or behaviours (e.g. feeding) will reduce habitat quality for native taxa?       | Yes            | Belica, L. (2007, April 26). Brown Trout ( <i>Salmo trutta</i> ): a technical conservation assessment. [Online]. USDA Forest Service, Rocky Mountain Region. Available: <a href="http://www.fs.fed.us/r2/projects/scp/assessments/browntrout.pdf">http://www.fs.fed.us/r2/projects/scp/assessments/browntrout.pdf</a> [date of access].)                                                                                                                                                                                                                                                                                                                                                                                                                                              | Low       |
| 25                              | 4.12 | Is the taxon likely to maintain a viable population even when present in low densities (or persisting in adverse conditions by way of a dormant form)?          | No             | no                                                                                                                                                                                                                                                                                                                                                                                                                                                                                                                                                                                                                                                                                                                                                                                    | Very high |
| <b>5. Resource exploitation</b> |      |                                                                                                                                                                 |                |                                                                                                                                                                                                                                                                                                                                                                                                                                                                                                                                                                                                                                                                                                                                                                                       |           |
| 26                              | 5.01 | Is the taxon likely to consume threatened or protected native taxa in the RA area?                                                                              | Yes            | It is possible that it consume endangered and protected native taxa in the RA area. If there are protected taxa in the RA area will consume them, whether or not the taxon is endangered.                                                                                                                                                                                                                                                                                                                                                                                                                                                                                                                                                                                             | Low       |
| 27                              | 5.02 | Is the taxon likely to sequester food resources (including nutrients) to the detriment of native taxa in the RA area?                                           | Not applicable | NOT APPLICABLE                                                                                                                                                                                                                                                                                                                                                                                                                                                                                                                                                                                                                                                                                                                                                                        | Very high |
| <b>6. Reproduction</b>          |      |                                                                                                                                                                 |                |                                                                                                                                                                                                                                                                                                                                                                                                                                                                                                                                                                                                                                                                                                                                                                                       |           |
| 28                              | 6.01 | Is the taxon likely to exhibit parental care and/or to reduce age-at-maturity in response to environmental conditions?                                          | No             | Belica, L. (2007, April 26). Brown Trout ( <i>Salmo trutta</i> ): a technical conservation assessment. [Online]. USDA Forest Service, Rocky Mountain Region. Available: <a href="http://www.fs.fed.us/r2/projects/scp/assessments/browntrout.pdf">http://www.fs.fed.us/r2/projects/scp/assessments/browntrout.pdf</a> [date of access].)                                                                                                                                                                                                                                                                                                                                                                                                                                              | Very high |
| 29                              | 6.02 | Is the taxon likely to produce viable gametes or propagules (in the RA area)?                                                                                   | Yes            | Yes                                                                                                                                                                                                                                                                                                                                                                                                                                                                                                                                                                                                                                                                                                                                                                                   | High      |
| 30                              | 6.03 | Is the taxon likely to hybridise naturally with native taxa?                                                                                                    | Yes            | Hybridization with eg. <i>Salmo marmoratus</i> , <i>Salmo obtusirostris</i> in Jadro river (Snoj, A., Razpet, A., Tomljanović, T., Treer, T., & Sušnik, S. (2007). Genetic composition of the Jadro softmouth trout following translocation into a new habitat. Conservation                                                                                                                                                                                                                                                                                                                                                                                                                                                                                                          | Very high |
| 31                              | 6.04 | Is the taxon likely to be hermaphroditic or to display asexual reproduction?                                                                                    | No             | (Belica, L. (2007, April 26). Brown Trout ( <i>Salmo trutta</i> ): a technical conservation assessment. [Online]. USDA Forest Service, Rocky Mountain Region. Available: <a href="http://www.fs.fed.us/r2/projects/scp/assessments/browntrout.pdf">http://www.fs.fed.us/r2/projects/scp/assessments/browntrout.pdf</a> [date of access].)                                                                                                                                                                                                                                                                                                                                                                                                                                             | Very high |
| 32                              | 6.05 | Is the taxon dependent on the presence of another taxon (or specific habitat features) to complete its life cycle?                                              | No             | no (Belica, L. (2007, April 26). Brown Trout ( <i>Salmo trutta</i> ): a technical conservation assessment. [Online]. USDA Forest Service, Rocky Mountain Region. Available: <a href="http://www.fs.fed.us/r2/projects/scp/assessments/browntrout.pdf">http://www.fs.fed.us/r2/projects/scp/assessments/browntrout.pdf</a> [date of access].)                                                                                                                                                                                                                                                                                                                                                                                                                                          | Very high |
| 33                              | 6.06 | Is the taxon known (or likely) to produce a large number of propagules or offspring within a short time span (e.g. < 1 year)?                                   | No             | No (Freyhof, J. 2011. <i>Salmo trutta</i> . The IUCN Red List of Threatened Species 2011)                                                                                                                                                                                                                                                                                                                                                                                                                                                                                                                                                                                                                                                                                             | Very high |
| 34                              | 6.07 | How many time units (days, months, years) does the taxon require to reach the age-at-first-reproduction?                                                        | 2              | Resident trouts usually spawn for the first time at 2-3 years. (Freyhof, J. 2011. <i>Salmo trutta</i> . The IUCN Red List of Threatened Species 2011.)                                                                                                                                                                                                                                                                                                                                                                                                                                                                                                                                                                                                                                | Very high |
| <b>7. Dispersal mechanisms</b>  |      |                                                                                                                                                                 |                |                                                                                                                                                                                                                                                                                                                                                                                                                                                                                                                                                                                                                                                                                                                                                                                       |           |
| 35                              | 7.01 | How many potential internal vectors/pathways could the taxon use to disperse within the RA area (with suitable protected areas (e.g. MCZ, MPA, SSSI)?           | >1             | 1. human impact 2. flooding 3. natural spread via natural and manmade watercourses                                                                                                                                                                                                                                                                                                                                                                                                                                                                                                                                                                                                                                                                                                    | Medium    |
| 36                              | 7.02 | Will any of these vectors/pathways bring the taxon in close proximity to one or more protected areas (e.g. MCZ, MPA, SSSI)?                                     | Yes            | Some of the vectors may introduce a taxon into the protected area.                                                                                                                                                                                                                                                                                                                                                                                                                                                                                                                                                                                                                                                                                                                    | Low       |
| 37                              | 7.03 | Does the taxon have a means of actively attaching itself to hard substrata (e.g. ship hulls, pilings, buoys) such that it enhances the likelihood of dispersal? | No             | Freyhof, J. 2011. <i>Salmo trutta</i> . The IUCN Red List of Threatened Species 2011                                                                                                                                                                                                                                                                                                                                                                                                                                                                                                                                                                                                                                                                                                  | Medium    |
| 38                              | 7.04 | Is natural dispersal of the taxon likely to occur as eggs (for animals) or as propagules (for plants: seeds, spores) in the RA area?                            | No             | Freyhof, J. 2011. <i>Salmo trutta</i> . The IUCN Red List of Threatened Species 2011                                                                                                                                                                                                                                                                                                                                                                                                                                                                                                                                                                                                                                                                                                  | Very high |
| 39                              | 7.05 | Is natural dispersal of the taxon likely to occur as larvae/juveniles (for animals) or as fragments/seedlings (for plants) in the RA area?                      | Yes            | (Freyhof, J. 2013. <i>Salmo trutta</i> . The IUCN Red List of Threatened Species 2013: e.T19861A9050312. <a href="http://dx.doi.org/10.2305/IUCN.UK.2008.RLTS.T19861A9050312.en">http://dx.doi.org/10.2305/IUCN.UK.2008.RLTS.T19861A9050312.en</a> )                                                                                                                                                                                                                                                                                                                                                                                                                                                                                                                                  | High      |
| 40                              | 7.06 | Are older life stages of the taxon likely to migrate in the RA area for reproduction?                                                                           | Yes            | yes, (Freyhof, J. 2013. <i>Salmo trutta</i> . The IUCN Red List of Threatened Species 2013: e.T19861A9050312. <a href="http://dx.doi.org/10.2305/IUCN.UK.2008.RLTS.T19861A9050312.en">http://dx.doi.org/10.2305/IUCN.UK.2008.RLTS.T19861A9050312.en</a> )                                                                                                                                                                                                                                                                                                                                                                                                                                                                                                                             | High      |
| 41                              | 7.07 | Are propagules or eggs of the taxon likely to be dispersed in the RA area by other animals?                                                                     | No             | The taxon no to be dispersed with propagules or eggs in the RA area by other animals.                                                                                                                                                                                                                                                                                                                                                                                                                                                                                                                                                                                                                                                                                                 | Very high |

|                                |      |                                                                                                                                                                              |                |                                                                                                                                                                                                                                                                                                                                                                                                                                                                                                                                                       |           |
|--------------------------------|------|------------------------------------------------------------------------------------------------------------------------------------------------------------------------------|----------------|-------------------------------------------------------------------------------------------------------------------------------------------------------------------------------------------------------------------------------------------------------------------------------------------------------------------------------------------------------------------------------------------------------------------------------------------------------------------------------------------------------------------------------------------------------|-----------|
| 42                             | 7.08 | Is dispersal of the taxon along any of the vectors/pathways mentioned in the previous seven questions (35–41; i.e. both unintentional or intentional) likely to be           | Yes            | There is a possibility of a high rate of spread of taxa. Eg. if a fertilized individual enters a new area by any means of expansion.                                                                                                                                                                                                                                                                                                                                                                                                                  | Low       |
| 43                             | 7.09 | Is dispersal of the taxon density dependent?                                                                                                                                 | Yes            | yes                                                                                                                                                                                                                                                                                                                                                                                                                                                                                                                                                   | High      |
| <b>8. Tolerance attributes</b> |      |                                                                                                                                                                              |                |                                                                                                                                                                                                                                                                                                                                                                                                                                                                                                                                                       |           |
| 44                             | 8.01 | Is the taxon able to withstand being out of water for extended periods (e.g. minimum of one or more hours) at some stage of its life cycle?                                  | No             | no                                                                                                                                                                                                                                                                                                                                                                                                                                                                                                                                                    | Very high |
| 45                             | 8.02 | Is the taxon tolerant of a wide range of water quality conditions relevant to that taxon? [In the Justification field, indicate the relevant water quality variable(s) being | No             | The taxon no tolerant of a wide range of water quality.                                                                                                                                                                                                                                                                                                                                                                                                                                                                                               | Medium    |
| 46                             | 8.03 | Can the taxon be controlled or eradicated in the wild with chemical, biological, or other agents/means?                                                                      | Not applicable | It is not regulated in Croatia                                                                                                                                                                                                                                                                                                                                                                                                                                                                                                                        | High      |
| 47                             | 8.04 | Is the taxon likely to tolerate or benefit from environmental/human disturbance?                                                                                             | No             | Freyhof, J. 2011. <i>Salmo trutta</i> . The IUCN Red List of Threatened Species 2011                                                                                                                                                                                                                                                                                                                                                                                                                                                                  | Very high |
| 48                             | 8.05 | Is the taxon able to tolerate salinity levels that are higher or lower than those found in its usual environment?                                                            | No             | Freyhof, J. 2011. <i>Salmo trutta</i> . The IUCN Red List of Threatened Species 2011                                                                                                                                                                                                                                                                                                                                                                                                                                                                  | Very high |
| 49                             | 8.06 | Are there effective natural enemies (predators) of the taxon present in the RA                                                                                               | Yes            | <i>Esox lucius</i> (CABI)                                                                                                                                                                                                                                                                                                                                                                                                                                                                                                                             | Medium    |
| <b>C. Climate change</b>       |      |                                                                                                                                                                              |                |                                                                                                                                                                                                                                                                                                                                                                                                                                                                                                                                                       |           |
| <b>9. Climate change</b>       |      |                                                                                                                                                                              |                |                                                                                                                                                                                                                                                                                                                                                                                                                                                                                                                                                       |           |
| 50                             | 9.01 | Under the predicted future climatic conditions, are the risks of entry into the RA area posed by the taxon likely to increase, decrease or not change?                       | Not applicable | not applicable                                                                                                                                                                                                                                                                                                                                                                                                                                                                                                                                        | Very high |
| 51                             | 9.02 | Under the predicted future climatic conditions, are the risks of establishment posed by the taxon likely to increase, decrease or not change?                                | Decrease       | The risks of establishment <i>S. trutta</i> is decreased. Reason for that is increased temperatures because its catch has dramatically declined in several parts of Europe. (Réalis-Doyelle, E., Pasquet, A., De Charleroy, D., Fontaine, P., & Teletchea, F. (2016). Strong Effects of Temperature on the Early Life Stages of a Cold Stenothermal Fish Species, Brown Trout ( <i>Salmo trutta</i> L.). <i>PLoS one</i> , 11(5). e0155487. <a href="https://doi.org/10.1371/journal.pone.0155487">https://doi.org/10.1371/journal.pone.0155487</a> ) | Medium    |
| 52                             | 9.03 | Under the predicted future climatic conditions, are the risks of dispersal within the RA area posed by the taxon likely to increase, decrease or not change?                 | Decrease       | The risk of spread in the RA area is reduced. Temperatures are a major problem therefore. (Réalis-Doyelle, E., Pasquet, A., De Charleroy, D., Fontaine, P., & Teletchea, F. (2016). Strong Effects of Temperature on the Early Life Stages of a Cold Stenothermal Fish Species, Brown Trout ( <i>Salmo trutta</i> L.). <i>PLoS one</i> , 11(5), e0155487. <a href="https://doi.org/10.1371/journal.pone.0155487">https://doi.org/10.1371/journal.pone.0155487</a> )                                                                                   | Medium    |
| 53                             | 9.04 | Under the predicted future climatic conditions, what is the likely magnitude of future potential impacts on biodiversity and/or ecological integrity/status?                 | Lower          | Lower (Réalis-Doyelle, E., Pasquet, A., De Charleroy, D., Fontaine, P., & Teletchea, F. (2016). Strong Effects of Temperature on the Early Life Stages of a Cold Stenothermal Fish Species, Brown Trout ( <i>Salmo trutta</i> L.). <i>PLoS one</i> , 11(5), e0155487. <a href="https://doi.org/10.1371/journal.pone.0155487">https://doi.org/10.1371/journal.pone.0155487</a> )                                                                                                                                                                       | Low       |
| 54                             | 9.05 | Under the predicted future climatic conditions, what is the likely magnitude of future potential impacts on ecosystem structure and/or function?                             | No change      | It is likely to have a negative impact on the ecosystem and system functioning, regardless of the assumed population decline.                                                                                                                                                                                                                                                                                                                                                                                                                         | Medium    |
| 55                             | 9.06 | Under the predicted future climatic conditions, what is the likely magnitude of future potential impacts on ecosystem services/socio-economic factors?                       | No change      | No change, the same situation                                                                                                                                                                                                                                                                                                                                                                                                                                                                                                                         | Medium    |

| Statistics                                     |             |
|------------------------------------------------|-------------|
| Scores                                         |             |
| <b>BRA</b>                                     | <b>28.0</b> |
| <b>BRA Outcome</b>                             | <b>-</b>    |
| <b>BRA+CCA</b>                                 | <b>22.0</b> |
| <b>BRA+CCA Outcome</b>                         | <b>-</b>    |
| Score partition                                |             |
| <b>A. Biogeography/Historical</b>              | <b>14.0</b> |
| 1. Domestication/Cultivation                   | 4.0         |
| 2. Climate, distribution and introduction risk | 0.0         |
| 3. Invasive elsewhere                          | 10.0        |
| <b>B. Biology/Ecology</b>                      | <b>14.0</b> |
| 4. Undesirable (or persistence) traits         | 8.0         |
| 5. Resource exploitation                       | 5.0         |
| 6. Reproduction                                | 2.0         |
| 7. Dispersal mechanisms                        | 3.0         |
| 8. Tolerance attributes                        | -4.0        |
| <b>C. Climate change</b>                       | <b>-6.0</b> |
| 9. Climate change                              | -6.0        |
| Answered Questions                             |             |
| <b>Total</b>                                   | <b>55</b>   |
| <b>A. Biogeography/Historical</b>              | <b>13</b>   |
| 1. Domestication/Cultivation                   | 3           |
| 2. Climate, distribution and introduction risk | 5           |
| 3. Invasive elsewhere                          | 5           |
| <b>B. Biology/Ecology</b>                      | <b>36</b>   |
| 4. Undesirable (or persistence) traits         | 12          |
| 5. Resource exploitation                       | 2           |
| 6. Reproduction                                | 7           |
| 7. Dispersal mechanisms                        | 9           |
| 8. Tolerance attributes                        | 6           |
| <b>C. Climate change</b>                       | <b>6</b>    |
| 9. Climate change                              | 6           |
| Sectors affected                               |             |

|                                       |    |
|---------------------------------------|----|
| Commercial                            | 9  |
| Environmental                         | 10 |
| Species or population nuisance traits | 6  |

| Thresholds |      |
|------------|------|
| BRA        | -    |
| BRA+CCA    | -    |
| Confidence |      |
| BRA+CCA    | 0.70 |
| BRA        | 0.72 |
| CCA        | 0.54 |

| Date and Time       |  |
|---------------------|--|
| 02/06/2020 09:13:47 |  |

## AS-ISK v2

| Taxon and Assessor details         |                                         |
|------------------------------------|-----------------------------------------|
| Category                           | Fishes and Lampreys (freshwater)        |
| Taxon name                         | <i>Salvelinus alpinus</i>               |
| Common name                        | Arctic charr                            |
| Assessor                           | Ana Marić                               |
| Risk screening context             |                                         |
| Reason and socio-economic benefits |                                         |
| Risk assessment area               | Danube & Adriatic basins BA, HR, ME, RS |
| Taxonomy                           |                                         |
| Native range                       |                                         |
| Introduced range                   |                                         |
| URL                                |                                         |

|                                                |      | Response                                                                                                                                                         | Justification (references and/or other information) | Confidence                                                                                                                                                                                                                                                                                                                                   |           |
|------------------------------------------------|------|------------------------------------------------------------------------------------------------------------------------------------------------------------------|-----------------------------------------------------|----------------------------------------------------------------------------------------------------------------------------------------------------------------------------------------------------------------------------------------------------------------------------------------------------------------------------------------------|-----------|
| A. Biogeography/Historical                     |      |                                                                                                                                                                  |                                                     |                                                                                                                                                                                                                                                                                                                                              |           |
| 1. Domestication/Cultivation                   |      |                                                                                                                                                                  |                                                     |                                                                                                                                                                                                                                                                                                                                              |           |
| 1                                              | 1.01 | Has the taxon been the subject of domestication (or cultivation) for at least 20 generations?                                                                    | Yes                                                 | Environmental conditions required for intensive farming of Arctic charr ( <i>Salvelinus alpinus</i> (L.)) Bjørn-Steinar Sæther, Sten Ivar Siikavuopio & Malcolm Jobling. 2016 Status of arctic charr ( <i>Salvelinus alpinus</i> ) farming in Norway, Sweden and Iceland B. -S. Sæther, S. I. Siikavuopio, H. Thorarensen & E. Brännäs. 2013 | Very high |
| 2                                              | 1.02 | Is the taxon harvested in the wild and likely to be sold or used in its live form?                                                                               | Yes                                                 | Status of arctic charr ( <i>Salvelinus alpinus</i> ) farming in Norway, Sweden and Iceland B. -S. Sæther, S. I. Siikavuopio, H. Thorarensen & E. Brännäs                                                                                                                                                                                     | High      |
| 3                                              | 1.03 | Does the taxon have invasive races, varieties, sub-taxa or congeners?                                                                                            | Yes                                                 | <i>S. fontinalis</i>                                                                                                                                                                                                                                                                                                                         | Very high |
| 2. Climate, distribution and introduction risk |      |                                                                                                                                                                  |                                                     |                                                                                                                                                                                                                                                                                                                                              |           |
| 4                                              | 2.01 | How similar are the climatic conditions of the Risk Assessment (RA) area and the taxon's native range?                                                           | Medium                                              | FRESHWATER ALIEN FISH SPECIES INTRODUCED INTO CROATIA FOR AQUACULTURE AND CONSEQUENCES OF THEIR ESCAPES AND RELEASES IN INLAND WATERS Marina Piria1*, Divna Lukić1, Tatjana Boroša-Pecigoš2. 2016                                                                                                                                            | High      |
| 5                                              | 2.02 | What is the quality of the climate matching data?                                                                                                                | Medium                                              | FRESHWATER ALIEN FISH SPECIES INTRODUCED INTO CROATIA FOR AQUACULTURE AND CONSEQUENCES OF THEIR ESCAPES AND RELEASES IN INLAND WATERS Marina Piria1*, Divna Lukić1, Tatjana Boroša-Pecigoš2                                                                                                                                                  | Medium    |
| 6                                              | 2.03 | Is the taxon already present outside of captivity in the RA area?                                                                                                | Yes                                                 | RISKS TO STOCKS OF NATIVE TROUT OF THE GENUS SALMO (ACTINOPTERYGII: SALMONIFORMES: SALMONIDAE) OF SERBIA AND MANAGEMENT FOR THEIR RECOVERY Predrag SIMONOVIĆ1*, Zoran VIDOVIĆ2, Ana TOŠIĆ1, Dubravka ŠKRABA1, Jelena ČANAK-ATLAGIĆ1, and Vera NIKOLIĆ. 2015                                                                                  | Very high |
| 7                                              | 2.04 | How many potential vectors could the taxon use to enter in the RA area?                                                                                          | One                                                 | RISKS TO STOCKS OF NATIVE TROUT OF THE GENUS SALMO (ACTINOPTERYGII: SALMONIFORMES: SALMONIDAE) OF SERBIA AND MANAGEMENT FOR THEIR RECOVERY Predrag SIMONOVIĆ1*, Zoran VIDOVIĆ2, Ana TOŠIĆ1, Dubravka ŠKRABA1, Jelena ČANAK-ATLAGIĆ1, and Vera NIKOLIĆ. 2015 stocking                                                                         | Very high |
| 8                                              | 2.05 | Is the taxon currently found in close proximity to, and likely to enter into, the RA area in the near future (e.g. unintentional and intentional introductions)? | Yes                                                 | FRESHWATER ALIEN FISH SPECIES INTRODUCED INTO CROATIA FOR AQUACULTURE AND CONSEQUENCES OF THEIR ESCAPES AND RELEASES IN INLAND WATERS Marina Piria1*, Divna Lukić1, Tatjana Boroša-Pecigoš. 2016                                                                                                                                             | High      |
| 3. Invasive elsewhere                          |      |                                                                                                                                                                  |                                                     |                                                                                                                                                                                                                                                                                                                                              |           |
| 9                                              | 3.01 | Has the taxon become naturalised (established viable populations) outside its native range?                                                                      | Yes                                                 | FRESHWATER ALIEN FISH SPECIES INTRODUCED INTO CROATIA FOR AQUACULTURE AND CONSEQUENCES OF THEIR ESCAPES AND RELEASES IN INLAND WATERS Marina Piria1*, Divna Lukić1, Tatjana Boroša-Pecigoš. 2016                                                                                                                                             | Very high |
| 10                                             | 3.02 | In the taxon's introduced range, are there known adverse impacts to wild stocks or commercial taxa?                                                              | No                                                  | RISKS TO STOCKS OF NATIVE TROUT OF THE GENUS SALMO (ACTINOPTERYGII: SALMONIFORMES: SALMONIDAE) OF SERBIA AND MANAGEMENT FOR THEIR RECOVERY Predrag SIMONOVIĆ1*, Zoran VIDOVIĆ2, Ana TOŠIĆ1, Dubravka ŠKRABA1, Jelena ČANAK-ATLAGIĆ1, and Vera NIKOLIĆ. 2015 stocking                                                                         | High      |
| 11                                             | 3.03 | In the taxon's introduced range, are there known adverse impacts to aquaculture?                                                                                 | No                                                  | RISKS TO STOCKS OF NATIVE TROUT OF THE GENUS SALMO (ACTINOPTERYGII: SALMONIFORMES: SALMONIDAE) OF SERBIA AND MANAGEMENT FOR THEIR RECOVERY Predrag SIMONOVIĆ1*, Zoran VIDOVIĆ2, Ana TOŠIĆ1, Dubravka ŠKRABA1, Jelena ČANAK-ATLAGIĆ1, and Vera NIKOLIĆ. 2015 stocking                                                                         | High      |
| 12                                             | 3.04 | In the taxon's introduced range, are there known adverse impacts to ecosystem services?                                                                          | No                                                  | RISKS TO STOCKS OF NATIVE TROUT OF THE GENUS SALMO (ACTINOPTERYGII: SALMONIFORMES: SALMONIDAE) OF SERBIA AND MANAGEMENT FOR THEIR RECOVERY Predrag SIMONOVIĆ1*, Zoran VIDOVIĆ2, Ana TOŠIĆ1, Dubravka ŠKRABA1, Jelena ČANAK-ATLAGIĆ1, and Vera NIKOLIĆ. 2015 stocking                                                                         | High      |
| 13                                             | 3.05 | In the taxon's introduced range, are there known adverse socio-economic impacts?                                                                                 | No                                                  | RISKS TO STOCKS OF NATIVE TROUT OF THE GENUS SALMO (ACTINOPTERYGII: SALMONIFORMES: SALMONIDAE) OF SERBIA AND MANAGEMENT FOR THEIR RECOVERY Predrag SIMONOVIĆ1*, Zoran VIDOVIĆ2, Ana TOŠIĆ1, Dubravka ŠKRABA1, Jelena ČANAK-ATLAGIĆ1, and Vera NIKOLIĆ. 2015 stocking                                                                         | High      |
| B. Biology/Ecology                             |      |                                                                                                                                                                  |                                                     |                                                                                                                                                                                                                                                                                                                                              |           |
| 4. Undesirable (or persistence) traits         |      |                                                                                                                                                                  |                                                     |                                                                                                                                                                                                                                                                                                                                              |           |
| 14                                             | 4.01 | Is it likely that the taxon will be poisonous or pose other risks to human health?                                                                               | No                                                  | RISKS TO STOCKS OF NATIVE TROUT OF THE GENUS SALMO (ACTINOPTERYGII: SALMONIFORMES: SALMONIDAE) OF SERBIA AND MANAGEMENT FOR THEIR RECOVERY Predrag SIMONOVIĆ1*, Zoran VIDOVIĆ2, Ana TOŠIĆ1, Dubravka ŠKRABA1, Jelena ČANAK-ATLAGIĆ1, and Vera NIKOLIĆ. 2015 stocking                                                                         | High      |
| 15                                             | 4.02 | Is it likely that the taxon will smother one or more native taxa (that are not threatened or protected)?                                                         | No                                                  | <a href="https://www.luontoportti.com/suomi/en/kalat/arctic-char">https://www.luontoportti.com/suomi/en/kalat/arctic-char</a>                                                                                                                                                                                                                | High      |
| 16                                             | 4.03 | Are there any threatened or protected taxa that the non-native taxon would parasitise in the RA area?                                                            | No                                                  | <a href="https://www.luontoportti.com/suomi/en/kalat/arctic-char">https://www.luontoportti.com/suomi/en/kalat/arctic-char</a>                                                                                                                                                                                                                | High      |



|                                 |      |                                                                                                                                                                         |     |                                                                                                                                                                                                                                                                      |           |
|---------------------------------|------|-------------------------------------------------------------------------------------------------------------------------------------------------------------------------|-----|----------------------------------------------------------------------------------------------------------------------------------------------------------------------------------------------------------------------------------------------------------------------|-----------|
| 17                              | 4.04 | Is the taxon adaptable in terms of climatic and other environmental conditions, thus enhancing its potential persistence if it has invaded or could invade the RA area? | No  | Environmental conditions required for intensive farming of Arctic charr ( <i>Salvelinus alpinus</i> (L.)) Bjørn-Steinar Sæther, Sten Ivar Siikavuopio & Malcolm Jobling . 2016                                                                                       | Medium    |
| 18                              | 4.05 | Is the taxon likely to disrupt food-web structure/function in aquatic ecosystems if it has invaded or is likely to invade the RA area?                                  | No  | RISKS TO STOCKS OF NATIVE TROUT OF THE GENUS SALMO (ACTINOPTERYGII: SALMONIFORMES: SALMONIDAE) OF SERBIA AND MANAGEMENT FOR THEIR RECOVERY Predrag SIMONOVIĆ1*, Zoran VIDOVIĆ2, Ana TOŠIĆ1, Dubravka ŠKRABA1, Jelena ČANAK-ATLAGIĆ1, and Vera NIKOLIĆ. 2015          | Medium    |
| 19                              | 4.06 | Is the taxon likely to exert adverse impacts on ecosystem services in the RA area?                                                                                      | No  | RISKS TO STOCKS OF NATIVE TROUT OF THE GENUS SALMO (ACTINOPTERYGII: SALMONIFORMES: SALMONIDAE) OF SERBIA AND MANAGEMENT FOR THEIR RECOVERY Predrag SIMONOVIĆ1*, Zoran VIDOVIĆ2, Ana TOŠIĆ1, Dubravka ŠKRABA1, Jelena ČANAK-ATLAGIĆ1, and Vera NIKOLIĆ. 2015 stocking | High      |
| 20                              | 4.07 | Is it likely that the taxon will host, and/or act as a vector for, recognised pests and infectious agents that are endemic in the RA                                    | No  | AS S. fontinalis                                                                                                                                                                                                                                                     | Medium    |
| 21                              | 4.08 | Is it likely that the taxon will host, and/or act as a vector for, recognised pests and infectious agents that are absent from (novel to) the RA area?                  | Yes | Parasites as indicators of individual feeding specialization in Arctic charr during winter in northern Norway R Knudsen et al. 2016                                                                                                                                  | High      |
| 22                              | 4.09 | Is it likely that the taxon will achieve a body size that will make it more likely to be released from captivity?                                                       | No  | Kottelat, M. and J. Freyhof, 2007. Handbook of European freshwater fishes. Publications Kottelat, Cornol and Freyhof, Berlin. 646 pp.                                                                                                                                | High      |
| 23                              | 4.10 | Is the taxon capable of sustaining itself in a range of water velocity conditions (e.g. versatile in habitat use)?                                                      | No  | Kottelat, M. and J. Freyhof, 2007. Handbook of European freshwater fishes. Publications Kottelat, Cornol and Freyhof, Berlin. 646 pp.                                                                                                                                | High      |
| 24                              | 4.11 | Is it likely that the taxon's mode of existence (e.g. excretion of by-products) or behaviours (e.g. feeding) will reduce habitat quality for native taxa?               | No  | Kottelat, M. and J. Freyhof, 2007. Handbook of European freshwater fishes. Publications Kottelat, Cornol and Freyhof, Berlin. 646 pp.                                                                                                                                | High      |
| 25                              | 4.12 | Is the taxon likely to maintain a viable population even when present in low densities (or persisting in adverse conditions by way of a dormant form)?                  | No  | FRESHWATER ALIEN FISH SPECIES INTRODUCED INTO CROATIA FOR AQUACULTURE AND CONSEQUENCES OF THEIR ESCAPES AND RELEASES IN INLAND WATERS Marina Piria1*, Divna Lukić1, Tatjana Boroša-Pecigoš 2016                                                                      | Medium    |
| <b>5. Resource exploitation</b> |      |                                                                                                                                                                         |     |                                                                                                                                                                                                                                                                      |           |
| 26                              | 5.01 | Is the taxon likely to consume threatened or protected native taxa in the RA area?                                                                                      | Yes | Kottelat, M. and J. Freyhof, 2007. Handbook of European freshwater fishes. Publications Kottelat, Cornol and Freyhof, Berlin. 646 pp.                                                                                                                                | High      |
| 27                              | 5.02 | Is the taxon likely to sequester food resources (including nutrients) to the detriment of native taxa in the RA area?                                                   | Yes | Kottelat, M. and J. Freyhof, 2007. Handbook of European freshwater fishes. Publications Kottelat, Cornol and Freyhof, Berlin. 646 pp.                                                                                                                                | High      |
| <b>6. Reproduction</b>          |      |                                                                                                                                                                         |     |                                                                                                                                                                                                                                                                      |           |
| 28                              | 6.01 | Is the taxon likely to exhibit parental care and/or to reduce age-at-maturity in response to environmental conditions?                                                  | Yes | Kottelat, M. and J. Freyhof, 2007. Handbook of European freshwater fishes. Publications Kottelat, Cornol and Freyhof, Berlin. 646 pp.                                                                                                                                | High      |
| 29                              | 6.02 | Is the taxon likely to produce viable gametes or propagules (in the RA area)?                                                                                           | Yes | Simonovic. Risks to stocks. 2015                                                                                                                                                                                                                                     | Very high |
| 30                              | 6.03 | Is the taxon likely to hybridise naturally with native taxa?                                                                                                            | No  | Kottelat, M. and J. Freyhof, 2007. Handbook of European freshwater fishes. Publications Kottelat, Cornol and Freyhof, Berlin. 646 pp.                                                                                                                                | Medium    |
| 31                              | 6.04 | Is the taxon likely to be hermaphroditic or to display asexual reproduction?                                                                                            | No  | Kottelat, M. and J. Freyhof, 2007. Handbook of European freshwater fishes. Publications Kottelat, Cornol and Freyhof, Berlin. 646 pp.                                                                                                                                | High      |
| 32                              | 6.05 | Is the taxon dependent on the presence of another taxon (or specific habitat features) to complete its life cycle?                                                      | No  | Kottelat, M. and J. Freyhof, 2007. Handbook of European freshwater fishes. Publications Kottelat, Cornol and Freyhof, Berlin. 646 pp.                                                                                                                                | Very high |
| 33                              | 6.06 | Is the taxon known (or likely) to produce a large number of propagules or offspring within a short time span (e.g. < 1 year)?                                           | Yes | Kottelat, M. and J. Freyhof, 2007. Handbook of European freshwater fishes. Publications Kottelat, Cornol and Freyhof, Berlin. 646 pp.                                                                                                                                | High      |
| 34                              | 6.07 | How many time units (days, months, years) does the taxon require to reach the age-at-first-reproduction?                                                                | 2   | Kottelat, M. and J. Freyhof, 2007. Handbook of European freshwater fishes. Publications Kottelat, Cornol and Freyhof, Berlin. 646 pp.                                                                                                                                | High      |
| <b>7. Dispersal mechanisms</b>  |      |                                                                                                                                                                         |     |                                                                                                                                                                                                                                                                      |           |
| 35                              | 7.01 | How many potential internal vectors/pathways could the taxon use to disperse within the RA area (with suitable protected areas (e.g. MCZ, MPA, SSSI)?                   | One | Stocking Simonovic et al. Risks to stocks. 2015                                                                                                                                                                                                                      | High      |
| 36                              | 7.02 | Will any of these vectors/pathways bring the taxon in close proximity to one or more protected areas (e.g. MCZ, MPA, SSSI)?                                             | Yes | FRESHWATER ALIEN FISH SPECIES INTRODUCED INTO CROATIA FOR AQUACULTURE AND CONSEQUENCES OF THEIR ESCAPES AND RELEASES IN INLAND WATERS Marina Piria1*, Divna Lukić1, Tatjana Boroša-Pecigoš 2016                                                                      | High      |
| 37                              | 7.03 | Does the taxon have a means of actively attaching itself to hard substrata (e.g. ship hulls, pilings, buoys) such that it enhances the likelihood of dispersal?         | No  | Kottelat, M. and J. Freyhof, 2007. Handbook of European freshwater fishes. Publications Kottelat, Cornol and Freyhof, Berlin. 646 pp.                                                                                                                                | High      |
| 38                              | 7.04 | Is natural dispersal of the taxon likely to occur as eggs (for animals) or as propagules (for plants: seeds, spores) in the RA area?                                    | No  | Kottelat, M. and J. Freyhof, 2007. Handbook of European freshwater fishes. Publications Kottelat, Cornol and Freyhof, Berlin. 646 pp.                                                                                                                                | High      |
| 39                              | 7.05 | Is natural dispersal of the taxon likely to occur as larvae/juveniles (for animals) or as fragments/seedlings (for plants) in the RA area?                              | Yes | Kottelat, M. and J. Freyhof, 2007. Handbook of European freshwater fishes. Publications Kottelat, Cornol and Freyhof, Berlin. 646 pp.                                                                                                                                | High      |
| 40                              | 7.06 | Are older life stages of the taxon likely to migrate in the RA area for reproduction?                                                                                   | Yes | Kottelat, M. and J. Freyhof, 2007. Handbook of European freshwater fishes. Publications Kottelat, Cornol and Freyhof, Berlin. 646 pp.                                                                                                                                | Very high |
| 41                              | 7.07 | Are propagules or eggs of the taxon likely to be dispersed in the RA area by other animals?                                                                             | No  | <a href="https://www.luontoportti.com/suomi/en/kalat/arctic-char">https://www.luontoportti.com/suomi/en/kalat/arctic-char</a>                                                                                                                                        | Very high |
| 42                              | 7.08 | Is dispersal of the taxon along any of the vectors/pathways mentioned in the previous seven questions (35–41; i.e. both unintentional or intentional) likely to be      | No  | <a href="https://www.luontoportti.com/suomi/en/kalat/arctic-char">https://www.luontoportti.com/suomi/en/kalat/arctic-char</a>                                                                                                                                        | Medium    |
| 43                              | 7.09 | Is dispersal of the taxon density dependent?                                                                                                                            | Yes | Density-dependent diel activity in stream-dwelling Arctic charr <i>Salvelinus alpinus</i> A Fingerle, N Larranaga et al. 2016                                                                                                                                        | High      |
| <b>8. Tolerance attributes</b>  |      |                                                                                                                                                                         |     |                                                                                                                                                                                                                                                                      |           |

|                          |      |                                                                                                                                                                              |           |                                                                                                                                                                    |           |
|--------------------------|------|------------------------------------------------------------------------------------------------------------------------------------------------------------------------------|-----------|--------------------------------------------------------------------------------------------------------------------------------------------------------------------|-----------|
| 44                       | 8.01 | Is the taxon able to withstand being out of water for extended periods (e.g. minimum of one or more hours) at some stage of its life cycle?                                  | No        | Kottelat, M. and J. Freyhof, 2007. Handbook of European freshwater fishes. Publications Kottelat, Cornol and Freyhof, Berlin. 646 pp.                              | High      |
| 45                       | 8.02 | Is the taxon tolerant of a wide range of water quality conditions relevant to that taxon? [In the Justification field, indicate the relevant water quality variable(s) being | No        | Kottelat, M. and J. Freyhof, 2007. Handbook of European freshwater fishes. Publications Kottelat, Cornol and Freyhof, Berlin. 646 pp.                              | Very high |
| 46                       | 8.03 | Can the taxon be controlled or eradicated in the wild with chemical, biological, or other agents/means?                                                                      | No        | <a href="https://www.luontoportti.com/suomi/en/kalat/arctic-char">https://www.luontoportti.com/suomi/en/kalat/arctic-char</a>                                      | Very high |
| 47                       | 8.04 | Is the taxon likely to tolerate or benefit from environmental/human disturbance?                                                                                             | No        | <a href="https://www.luontoportti.com/suomi/en/kalat/arctic-char">https://www.luontoportti.com/suomi/en/kalat/arctic-char</a>                                      | Very high |
| 48                       | 8.05 | Is the taxon able to tolerate salinity levels that are higher or lower than those found in its usual environment?                                                            | Yes       | Kottelat, M. and J. Freyhof, 2007. Handbook of European freshwater fishes. Publications Kottelat, Cornol and Freyhof, Berlin. 646 pp.                              | Very high |
| 49                       | 8.06 | Are there effective natural enemies (predators) of the taxon present in the RA area?                                                                                         | Yes       | Kottelat, M. and J. Freyhof, 2007. Handbook of European freshwater fishes. Publications Kottelat, Cornol and Freyhof, Berlin. 646 pp. salmonid egg eaters, mammals | Very high |
| <b>C. Climate change</b> |      |                                                                                                                                                                              |           |                                                                                                                                                                    |           |
| <b>9. Climate change</b> |      |                                                                                                                                                                              |           |                                                                                                                                                                    |           |
| 50                       | 9.01 | Under the predicted future climatic conditions, are the risks of entry into the RA area posed by the taxon likely to increase, decrease or not change?                       | No change | Kottelat, M. and J. Freyhof, 2007. Handbook of European freshwater fishes. Publications Kottelat, Cornol and Freyhof, Berlin. 646 pp.                              | High      |
| 51                       | 9.02 | Under the predicted future climatic conditions, are the risks of establishment posed by the taxon likely to increase, decrease or not change?                                | Decrease  | Kottelat, M. and J. Freyhof, 2007. Handbook of European freshwater fishes. Publications Kottelat, Cornol and Freyhof, Berlin. 646 pp.                              | High      |
| 52                       | 9.03 | Under the predicted future climatic conditions, are the risks of dispersal within the RA area posed by the taxon likely to increase, decrease or not change?                 | No change | Kottelat, M. and J. Freyhof, 2007. Handbook of European freshwater fishes. Publications Kottelat, Cornol and Freyhof, Berlin. 646 pp.                              | High      |
| 53                       | 9.04 | Under the predicted future climatic conditions, what is the likely magnitude of future potential impacts on biodiversity and/or ecological integrity/status?                 | Lower     | Kottelat, M. and J. Freyhof, 2007. Handbook of European freshwater fishes. Publications Kottelat, Cornol and Freyhof, Berlin. 646 pp.                              | High      |
| 54                       | 9.05 | Under the predicted future climatic conditions, what is the likely magnitude of future potential impacts on ecosystem structure and/or function?                             | No change | Kottelat, M. and J. Freyhof, 2007. Handbook of European freshwater fishes. Publications Kottelat, Cornol and Freyhof, Berlin. 646 pp.                              | Medium    |
| 55                       | 9.06 | Under the predicted future climatic conditions, what is the likely magnitude of future potential impacts on ecosystem services/socio-economic factors?                       | No change | Kottelat, M. and J. Freyhof, 2007. Handbook of European freshwater fishes. Publications Kottelat, Cornol and Freyhof, Berlin. 646 pp.                              | High      |

| Statistics                                     |             |
|------------------------------------------------|-------------|
| Scores                                         |             |
| <b>BRA</b>                                     | <b>15.5</b> |
| <b>BRA Outcome</b>                             | <b>-</b>    |
| <b>BRA+CCA</b>                                 | <b>11.5</b> |
| <b>BRA+CCA Outcome</b>                         | <b>-</b>    |
| Score partition                                |             |
| <b>A. Biogeography/Historical</b>              | <b>6.5</b>  |
| 1. Domestication/Cultivation                   | 4.0         |
| 2. Climate, distribution and introduction risk | 1.0         |
| 3. Invasive elsewhere                          | 1.5         |
| <b>B. Biology/Ecology</b>                      | <b>9.0</b>  |
| 4. Undesirable (or persistence) traits         | 0.0         |
| 5. Resource exploitation                       | 7.0         |
| 6. Reproduction                                | 2.0         |
| 7. Dispersal mechanisms                        | 1.0         |
| 8. Tolerance attributes                        | -1.0        |
| <b>C. Climate change</b>                       | <b>-4.0</b> |
| 9. Climate change                              | -4.0        |
| Answered Questions                             |             |
| <b>Total</b>                                   | <b>55</b>   |
| <b>A. Biogeography/Historical</b>              | <b>13</b>   |
| 1. Domestication/Cultivation                   | 3           |
| 2. Climate, distribution and introduction risk | 5           |
| 3. Invasive elsewhere                          | 5           |
| <b>B. Biology/Ecology</b>                      | <b>36</b>   |
| 4. Undesirable (or persistence) traits         | 12          |
| 5. Resource exploitation                       | 2           |
| 6. Reproduction                                | 7           |
| 7. Dispersal mechanisms                        | 9           |
| 8. Tolerance attributes                        | 6           |
| <b>C. Climate change</b>                       | <b>6</b>    |
| 9. Climate change                              | 6           |
| Sectors affected                               |             |
| <b>Commercial</b>                              | <b>4</b>    |
| <b>Environmental</b>                           | <b>4</b>    |
| <b>Species or population nuisance traits</b>   | <b>6</b>    |

| Thresholds     |             |
|----------------|-------------|
| <b>BRA</b>     | <b>-</b>    |
| <b>BRA+CCA</b> | <b>-</b>    |
| Confidence     |             |
| <b>BRA+CCA</b> | <b>0.78</b> |
| <b>BRA</b>     | <b>0.79</b> |
| <b>CCA</b>     | <b>0.71</b> |

| Date and Time       |
|---------------------|
| 26/05/2021 16:49:41 |

## AS-ISK v2

| Taxon and Assessor details         |                                         |
|------------------------------------|-----------------------------------------|
| Category                           | Fishes and Lampreys (freshwater)        |
| Taxon name                         | <i>Salvelinus alpinus</i>               |
| Common name                        | Arctic charr                            |
| Assessor                           | Ivan Špelić                             |
| Risk screening context             |                                         |
| Reason and socio-economic benefits |                                         |
| Risk assessment area               | Danube & Adriatic basins BA, HR, ME, RS |
| Taxonomy                           |                                         |
| Native range                       |                                         |
| Introduced range                   |                                         |
| URL                                |                                         |

|                                                |      | Response                                                                                                                                                                | Justification (references and/or other information) | Confidence                                                                                                                                                                                                                                                                                                                                                                                                                                                                                                                                                                                                                                                                                      |           |
|------------------------------------------------|------|-------------------------------------------------------------------------------------------------------------------------------------------------------------------------|-----------------------------------------------------|-------------------------------------------------------------------------------------------------------------------------------------------------------------------------------------------------------------------------------------------------------------------------------------------------------------------------------------------------------------------------------------------------------------------------------------------------------------------------------------------------------------------------------------------------------------------------------------------------------------------------------------------------------------------------------------------------|-----------|
| A. Biogeography/Historical                     |      |                                                                                                                                                                         |                                                     |                                                                                                                                                                                                                                                                                                                                                                                                                                                                                                                                                                                                                                                                                                 |           |
| 1. Domestication/Cultivation                   |      |                                                                                                                                                                         |                                                     |                                                                                                                                                                                                                                                                                                                                                                                                                                                                                                                                                                                                                                                                                                 |           |
| 1                                              | 1.01 | Has the taxon been the subject of domestication (or cultivation) for at least 20 generations?                                                                           | Yes                                                 | S. alpinus has been commercially farmed since the early 90ths and today, the total production is 3000, 2300 and 700 tonnes/year in Iceland, Sweden and Norway, respectively. (4) (PDF) Arctic charr farming. Available from: <a href="https://www.researchgate.net/publication/277835864_Arctic_charr_farming">https://www.researchgate.net/publication/277835864_Arctic_charr_farming</a> [accessed Mar 04 2020].                                                                                                                                                                                                                                                                              | Very high |
| 2                                              | 1.02 | Is the taxon harvested in the wild and likely to be sold or used in its live form?                                                                                      | No                                                  | Restocking is done with farmed fish (Savari et al. 2017).                                                                                                                                                                                                                                                                                                                                                                                                                                                                                                                                                                                                                                       | Low       |
| 3                                              | 1.03 | Does the taxon have invasive races, varieties, sub-taxa or congeners?                                                                                                   | Yes                                                 | Salvelinus fontinalis (CABI 2019).                                                                                                                                                                                                                                                                                                                                                                                                                                                                                                                                                                                                                                                              | High      |
| 2. Climate, distribution and introduction risk |      |                                                                                                                                                                         |                                                     |                                                                                                                                                                                                                                                                                                                                                                                                                                                                                                                                                                                                                                                                                                 |           |
| 4                                              | 2.01 | How similar are the climatic conditions of the Risk Assessment (RA) area and the taxon's native range?                                                                  | High                                                | Climatch 2020                                                                                                                                                                                                                                                                                                                                                                                                                                                                                                                                                                                                                                                                                   | Medium    |
| 5                                              | 2.02 | What is the quality of the climate matching data?                                                                                                                       | Medium                                              | Climatch 2020                                                                                                                                                                                                                                                                                                                                                                                                                                                                                                                                                                                                                                                                                   | High      |
| 6                                              | 2.03 | Is the taxon already present outside of captivity in the RA area?                                                                                                       | Yes                                                 | Lenhardt, M., Markovic, G., Hegedis, A. et al. Non-native and translocated fish species in Serbia and their impact on the native ichthyofauna. Rev Fish Biol Fisheries 21, 407–421 (2011).                                                                                                                                                                                                                                                                                                                                                                                                                                                                                                      | Very high |
| 7                                              | 2.04 | How many potential vectors could the taxon use to enter in the RA area?                                                                                                 | Not applicable                                      | Already present.                                                                                                                                                                                                                                                                                                                                                                                                                                                                                                                                                                                                                                                                                | Very high |
| 8                                              | 2.05 | Is the taxon currently found in close proximity to, and likely to enter into, the RA area in the near future (e.g. unintentional and intentional introductions)?        | Not applicable                                      | Already present.                                                                                                                                                                                                                                                                                                                                                                                                                                                                                                                                                                                                                                                                                | Very high |
| 3. Invasive elsewhere                          |      |                                                                                                                                                                         |                                                     |                                                                                                                                                                                                                                                                                                                                                                                                                                                                                                                                                                                                                                                                                                 |           |
| 9                                              | 3.01 | Has the taxon become naturalised (established viable populations) outside its introduced range?                                                                         | Yes                                                 | Welcomme, R.L., 1988. International introductions of inland aquatic species. FAO Fish. Tech. Pap. No. 294. 318: 115–119.                                                                                                                                                                                                                                                                                                                                                                                                                                                                                                                                                                        | Very high |
| 10                                             | 3.02 | In the taxon's introduced range, are there known adverse impacts to wild stocks or commercial taxa?                                                                     | Yes                                                 | U.S. Fish & Wildlife Service, Web Version, 1/31/2019: Arctic Char (Salvelinus alpinus). Ecological Risk Screening Summary                                                                                                                                                                                                                                                                                                                                                                                                                                                                                                                                                                       | Low       |
| 11                                             | 3.03 | In the taxon's introduced range, are there known adverse impacts to aquaculture?                                                                                        | No                                                  | Farmed in aquaculture (Froese & Pauly 2020), no adverse impact.                                                                                                                                                                                                                                                                                                                                                                                                                                                                                                                                                                                                                                 | High      |
| 12                                             | 3.04 | In the taxon's introduced range, are there known adverse impacts to ecosystem services?                                                                                 | No                                                  | There are no known negative impacts of arctic char on humans (Flack, M. 2019. "Salvelinus alpinus" (On-line), Animal Diversity Web. Accessed May 04, 2020 at <a href="https://animaldiversity.org/accounts/Salvelinus_alpinus/">https://animaldiversity.org/accounts/Salvelinus_alpinus/</a> ).                                                                                                                                                                                                                                                                                                                                                                                                 | Medium    |
| 13                                             | 3.05 | In the taxon's introduced range, are there known adverse socio-economic impacts?                                                                                        | No                                                  | There are no known negative impacts of arctic char on humans (Flack, M. 2019. "Salvelinus alpinus" (On-line), Animal Diversity Web. Accessed May 04, 2020 at <a href="https://animaldiversity.org/accounts/Salvelinus_alpinus/">https://animaldiversity.org/accounts/Salvelinus_alpinus/</a> ).                                                                                                                                                                                                                                                                                                                                                                                                 | Medium    |
| B. Biology/Ecology                             |      |                                                                                                                                                                         |                                                     |                                                                                                                                                                                                                                                                                                                                                                                                                                                                                                                                                                                                                                                                                                 |           |
| 4. Undesirable (or persistence) traits         |      |                                                                                                                                                                         |                                                     |                                                                                                                                                                                                                                                                                                                                                                                                                                                                                                                                                                                                                                                                                                 |           |
| 14                                             | 4.01 | Is it likely that the taxon will be poisonous or pose other risks to human health?                                                                                      | No                                                  | Harmless (Froese & Pauly 2020).                                                                                                                                                                                                                                                                                                                                                                                                                                                                                                                                                                                                                                                                 | Very high |
| 15                                             | 4.02 | Is it likely that the taxon will smother one or more native taxa (that are not threatened or protected)?                                                                | No                                                  | It is typically found in cool or cold lakes with depauperate fish communities. In alpine or northern lakes, it is often the only fish species (U.S. Fish & Wildlife Service, Web Version, 1/31/2019: Arctic Char (Salvelinus alpinus). Ecological Risk Screening Summary). The impacts of this species are currently unknown (Pam Fuller, and Matt Neilson, 2020, Salvelinus alpinus (Linnaeus, 1758): U.S. Geological Survey, Nonindigenous Aquatic Species Database, Gainesville, FL, <a href="https://nas.er.usgs.gov/queries/FactSheet.aspx?SpeciesID=935">https://nas.er.usgs.gov/queries/FactSheet.aspx?SpeciesID=935</a> , Revision Date: 4/30/2012. Peer Review Date: 4/30/2012. Access | Low       |
| 16                                             | 4.03 | Are there any threatened or protected taxa that the non-native taxon would parasitise in the RA area?                                                                   | No                                                  | No parasitic behaviour.                                                                                                                                                                                                                                                                                                                                                                                                                                                                                                                                                                                                                                                                         | Very high |
| 17                                             | 4.04 | Is the taxon adaptable in terms of climatic and other environmental conditions, thus enhancing its potential persistence if it has invaded or could invade the RA area? | No                                                  | Occurs in the sea along coasts, estuaries, rivers, and lakes with cold, clear water (Froese & Pauly 2020).                                                                                                                                                                                                                                                                                                                                                                                                                                                                                                                                                                                      | Very high |
| 18                                             | 4.05 | Is the taxon likely to disrupt food-web structure/function in aquatic ecosystems if it has invaded or is likely to invade the RA area?                                  | Yes                                                 | U.S. Fish & Wildlife Service, Web Version, 1/31/2019: Arctic Char (Salvelinus alpinus). Ecological Risk Screening Summary                                                                                                                                                                                                                                                                                                                                                                                                                                                                                                                                                                       | Low       |
| 19                                             | 4.06 | Is the taxon likely to exert adverse impacts on ecosystem services in the RA area?                                                                                      | No                                                  | There are no known negative impacts of arctic char on humans (Flack, M. 2019. "Salvelinus alpinus" (On-line), Animal Diversity Web. Accessed May 04, 2020 at <a href="https://animaldiversity.org/accounts/Salvelinus_alpinus/">https://animaldiversity.org/accounts/Salvelinus_alpinus/</a> ).                                                                                                                                                                                                                                                                                                                                                                                                 | Medium    |
| 20                                             | 4.07 | Is it likely that the taxon will host, and/or act as a vector for, recognised pests and infectious agents that are endemic in the RA area?                              | Yes                                                 | U.S. Fish & Wildlife Service, Web Version, 1/31/2019: Arctic Char (Salvelinus alpinus). Ecological Risk Screening Summary                                                                                                                                                                                                                                                                                                                                                                                                                                                                                                                                                                       | High      |

|                                 |      |                                                                                                                                                                              |                |                                                                                                                                                                                                                                                                                                                                                            |           |
|---------------------------------|------|------------------------------------------------------------------------------------------------------------------------------------------------------------------------------|----------------|------------------------------------------------------------------------------------------------------------------------------------------------------------------------------------------------------------------------------------------------------------------------------------------------------------------------------------------------------------|-----------|
| 21                              | 4.08 | Is it likely that the taxon will host, and/or act as a vector for, recognised pests and infectious agents that are absent from (novel to) the RA area?                       | Yes            | U.S. Fish & Wildlife Service, Web Version, 1/31/2019: Arctic Char ( <i>Salvelinus alpinus</i> ). Ecological Risk Screening Summary                                                                                                                                                                                                                         | High      |
| 22                              | 4.09 | Is it likely that the taxon will achieve a body size that will make it more likely to be released from captivity?                                                            | Yes            | Maximum size 107 cm and 15 KG (Froese & Pauly 2020).                                                                                                                                                                                                                                                                                                       | Very high |
| 23                              | 4.10 | Is the taxon capable of sustaining itself in a range of water velocity conditions (e.g. versatile in habitat use)?                                                           | Yes            | Occurs in the sea along coasts, estuaries, rivers, and lakes with cold, clear water (Froese & Pauly 2020).                                                                                                                                                                                                                                                 | Very high |
| 24                              | 4.11 | Is it likely that the taxon's mode of existence (e.g. excretion of by-products) or behaviours (e.g. feeding) will reduce habitat quality for native taxa?                    | No             | Typical environment of the charr is oligotrophic and ultraoligotrophic lakes (U.S. Fish & Wildlife Service, Web Version, 1/31/2019: Arctic Char ( <i>Salvelinus alpinus</i> ). Ecological Risk Screening Summary).                                                                                                                                         | Low       |
| 25                              | 4.12 | Is the taxon likely to maintain a viable population even when present in low densities (or persisting in adverse conditions by way of a dormant form)?                       | No             | No, minimum population doubling time 4.5 - 14 years (Froese & Pauly 2020).                                                                                                                                                                                                                                                                                 | Low       |
| <b>5. Resource exploitation</b> |      |                                                                                                                                                                              |                |                                                                                                                                                                                                                                                                                                                                                            |           |
| 26                              | 5.01 | Is the taxon likely to consume threatened or protected native taxa in the RA area?                                                                                           | Yes            | Flack, M. 2019. "Salvelinus alpinus" (On-line), Animal Diversity Web. Accessed May 04, 2020 at <a href="https://animaldiversity.org/accounts/Salvelinus_alpinus/">https://animaldiversity.org/accounts/Salvelinus_alpinus/</a>                                                                                                                             | High      |
| 27                              | 5.02 | Is the taxon likely to sequester food resources (including nutrients) to the detriment of native taxa in the RA area?                                                        | Not applicable | No data for calculation.                                                                                                                                                                                                                                                                                                                                   | Very high |
| <b>6. Reproduction</b>          |      |                                                                                                                                                                              |                |                                                                                                                                                                                                                                                                                                                                                            |           |
| 28                              | 6.01 | Is the taxon likely to exhibit parental care and/or to reduce age-at-maturity in response to environmental conditions?                                                       | No             | Froese & Pauly 2020.                                                                                                                                                                                                                                                                                                                                       | Very high |
| 29                              | 6.02 | Is the taxon likely to produce viable gametes or propagules (in the RA area)?                                                                                                | Yes            | Lenhardt, M., Markovic, G., Hegedis, A. et al. Non-native and translocated fish species in Serbia and their impact on the native ichthyofauna. <i>Rev Fish Biol Fisheries</i> 21, 407–421 (2011).                                                                                                                                                          | Very high |
| 30                              | 6.03 | Is the taxon likely to hybridise naturally with native taxa?                                                                                                                 | No             | Hybridization with <i>Salmo trutta</i> is possible in hatcheries but survival is low. No hybridization reported in nature (Hisar SA, Yanik T, Hisar O (2003). Hatchery and growth performance of trout pure breeds, <i>Salvelinus alpinus</i> and <i>Salmo trutta fario</i> , and their hybrid. <i>The Israeli J. Aquaculture – Bamidqeh</i> , 55(3): 154- | Low       |
| 31                              | 6.04 | Is the taxon likely to be hermaphroditic or to display asexual reproduction?                                                                                                 | No             | Froese & Pauly 2020                                                                                                                                                                                                                                                                                                                                        | Very high |
| 32                              | 6.05 | Is the taxon dependent on the presence of another taxon (or specific habitat features) to complete its life cycle?                                                           | No             | Froese & Pauly 2020.                                                                                                                                                                                                                                                                                                                                       | High      |
| 33                              | 6.06 | Is the taxon known (or likely) to produce a large number of propagules or offspring within a short time span (e.g. < 1 year)?                                                | Yes            | Max 8065 eggs per female (Froese & Pauly 2020).                                                                                                                                                                                                                                                                                                            | High      |
| 34                              | 6.07 | How many time units (days, months, years) does the taxon require to reach the age-at-first-reproduction?                                                                     | 3              | Minimum 3 years (Froese & Pauly 2020).                                                                                                                                                                                                                                                                                                                     | Medium    |
| <b>7. Dispersal mechanisms</b>  |      |                                                                                                                                                                              |                |                                                                                                                                                                                                                                                                                                                                                            |           |
| 35                              | 7.01 | How many potential internal vectors/pathways could the taxon use to disperse within the RA area (with suitable protected areas (e.g. MCZ, MPA, SSSI)?                        | One            | Stocking for angling (U.S. Fish & Wildlife Service, Web Version, 1/31/2019: Arctic Char ( <i>Salvelinus alpinus</i> ). Ecological Risk Screening Summary).                                                                                                                                                                                                 | Medium    |
| 36                              | 7.02 | Will any of these vectors/pathways bring the taxon in close proximity to one or more protected areas (e.g. MCZ, MPA, SSSI)?                                                  | No             | Personal opinion.                                                                                                                                                                                                                                                                                                                                          | Low       |
| 37                              | 7.03 | Does the taxon have a means of actively attaching itself to hard substrata (e.g. ship hulls, pilings, buoys) such that it enhances the likelihood of dispersal?              | No             | No adaptations.                                                                                                                                                                                                                                                                                                                                            | Very high |
| 38                              | 7.04 | Is natural dispersal of the taxon likely to occur as eggs (for animals) or as propagules (for plants: seeds, spores) in the RA area?                                         | No             | Could probably be established only in lakes (no current to disperse eggs), eggs covered in gravel (Froese & Pauly 2020, Flack, M. 2019. "Salvelinus alpinus" (On-line), Animal Diversity Web. Accessed May 04, 2020 at                                                                                                                                     | Medium    |
| 39                              | 7.05 | Is natural dispersal of the taxon likely to occur as larvae/juveniles (for animals) or as fragments/seedlings (for plants) in the RA area?                                   | No             | Could probably be established only in lakes (no current to disperse juveniles).                                                                                                                                                                                                                                                                            | Medium    |
| 40                              | 7.06 | Are older life stages of the taxon likely to migrate in the RA area for reproduction?                                                                                        | No             | Migration in anadromous populations (Froese & Pauly 2020), highly unlikely in RA area.                                                                                                                                                                                                                                                                     | High      |
| 41                              | 7.07 | Are propagules or eggs of the taxon likely to be dispersed in the RA area by other animals?                                                                                  | No             | Eggs covered in redd (Froese & Pauly 2020).                                                                                                                                                                                                                                                                                                                | High      |
| 42                              | 7.08 | Is dispersal of the taxon along any of the vectors/pathways mentioned in the previous seven questions (35–41; i.e. both unintentional or intentional) likely to be           | Yes            | Stocking.                                                                                                                                                                                                                                                                                                                                                  | High      |
| 43                              | 7.09 | Is dispersal of the taxon density dependent?                                                                                                                                 | No             | Not documented.                                                                                                                                                                                                                                                                                                                                            | Medium    |
| <b>8. Tolerance attributes</b>  |      |                                                                                                                                                                              |                |                                                                                                                                                                                                                                                                                                                                                            |           |
| 44                              | 8.01 | Is the taxon able to withstand being out of water for extended periods (e.g. minimum of one or more hours) at some stage of its life cycle?                                  | No             | Sensitive species (temperature and oxygen) (Froese & Pauly 2020).                                                                                                                                                                                                                                                                                          | Very high |
| 45                              | 8.02 | Is the taxon tolerant of a wide range of water quality conditions relevant to that taxon? [In the Justification field, indicate the relevant water quality variable(s) being | No             | Extremely sensitive to water pollution (Froese & Pauly 2020).                                                                                                                                                                                                                                                                                              | Very high |
| 46                              | 8.03 | Can the taxon be controlled or eradicated in the wild with chemical, biological, or other agents/means?                                                                      | No             | Not allowed.                                                                                                                                                                                                                                                                                                                                               | Very high |

|                          |      |                                                                                                                                                              |                |                                                                                                                                                                                                                                                                                                             |           |
|--------------------------|------|--------------------------------------------------------------------------------------------------------------------------------------------------------------|----------------|-------------------------------------------------------------------------------------------------------------------------------------------------------------------------------------------------------------------------------------------------------------------------------------------------------------|-----------|
| 47                       | 8.04 | Is the taxon likely to tolerate or benefit from environmental/human disturbance?                                                                             | No             | Typical environment of the charr is oligotrophic and ultraoligotrophic lakes (U.S. Fish & Wildlife Service, Web Version, 1/31/2019: Arctic Char ( <i>Salvelinus alpinus</i> ). Ecological Risk Screening Summary). Any type of human disturbance usually results in eutrophication (reservoirs, pollution). | Medium    |
| 48                       | 8.05 | Is the taxon able to tolerate salinity levels that are higher or lower than those found in its usual environment?                                            | Yes            | Anadromous species (Froese & Pauly 2020).                                                                                                                                                                                                                                                                   | Very high |
| 49                       | 8.06 | Are there effective natural enemies (predators) of the taxon present in the RA                                                                               | Yes            | Piscivorous birds, otters (personal opinion).                                                                                                                                                                                                                                                               | Medium    |
| <b>C. Climate change</b> |      |                                                                                                                                                              |                |                                                                                                                                                                                                                                                                                                             |           |
| <b>9. Climate change</b> |      |                                                                                                                                                              |                |                                                                                                                                                                                                                                                                                                             |           |
| 50                       | 9.01 | Under the predicted future climatic conditions, are the risks of entry into the RA area posed by the taxon likely to increase, decrease or not change?       | Not applicable | Already present.                                                                                                                                                                                                                                                                                            | High      |
| 51                       | 9.02 | Under the predicted future climatic conditions, are the risks of establishment posed by the taxon likely to increase, decrease or not change?                | Decrease       | James D. Reist , Michael Power & J. Brian Dempson (2013): Arctic charr ( <i>Salvelinus alpinus</i> ): a case study of the importance of understanding biodiversity and taxonomic issues in northern fishes, <i>Biodiversity</i> , 14:1, 45-56                                                               | High      |
| 52                       | 9.03 | Under the predicted future climatic conditions, are the risks of dispersal within the RA area posed by the taxon likely to increase, decrease or not change? | Decrease       | James D. Reist , Michael Power & J. Brian Dempson (2013): Arctic charr ( <i>Salvelinus alpinus</i> ): a case study of the importance of understanding biodiversity and taxonomic issues in northern fishes, <i>Biodiversity</i> , 14:1, 45-56                                                               | High      |
| 53                       | 9.04 | Under the predicted future climatic conditions, what is the likely magnitude of future potential impacts on biodiversity and/or ecological integrity/status? | Lower          | James D. Reist , Michael Power & J. Brian Dempson (2013): Arctic charr ( <i>Salvelinus alpinus</i> ): a case study of the importance of understanding biodiversity and taxonomic issues in northern fishes, <i>Biodiversity</i> , 14:1, 45-56                                                               | High      |
| 54                       | 9.05 | Under the predicted future climatic conditions, what is the likely magnitude of future potential impacts on ecosystem structure and/or function?             | Lower          | James D. Reist , Michael Power & J. Brian Dempson (2013): Arctic charr ( <i>Salvelinus alpinus</i> ): a case study of the importance of understanding biodiversity and taxonomic issues in northern fishes, <i>Biodiversity</i> , 14:1, 45-56                                                               | High      |
| 55                       | 9.06 | Under the predicted future climatic conditions, what is the likely magnitude of future potential impacts on ecosystem services/socio-economic factors?       | No change      | No predicted impact in current conditions, no change under future conditions.                                                                                                                                                                                                                               | High      |

| Statistics                                     |             |
|------------------------------------------------|-------------|
| Scores                                         |             |
| <b>BRA</b>                                     | <b>14.0</b> |
| <b>BRA Outcome</b>                             | <b>-</b>    |
| <b>BRA+CCA</b>                                 | <b>6.0</b>  |
| <b>BRA+CCA Outcome</b>                         | <b>-</b>    |
| Score partition                                |             |
| <b>A. Biogeography/Historical</b>              | <b>9.0</b>  |
| 1. Domestication/Cultivation                   | 2.0         |
| 2. Climate, distribution and introduction risk | 1.0         |
| 3. Invasive elsewhere                          | 6.0         |
| <b>B. Biology/Ecology</b>                      | <b>5.0</b>  |
| 4. Undesirable (or persistence) traits         | 4.0         |
| 5. Resource exploitation                       | 5.0         |
| 6. Reproduction                                | 1.0         |
| 7. Dispersal mechanisms                        | -4.0        |
| 8. Tolerance attributes                        | -1.0        |
| <b>C. Climate change</b>                       | <b>-8.0</b> |
| 9. Climate change                              | -8.0        |
| Answered Questions                             |             |
| <b>Total</b>                                   | <b>55</b>   |
| <b>A. Biogeography/Historical</b>              | <b>13</b>   |
| 1. Domestication/Cultivation                   | 3           |
| 2. Climate, distribution and introduction risk | 5           |
| 3. Invasive elsewhere                          | 5           |
| <b>B. Biology/Ecology</b>                      | <b>36</b>   |
| 4. Undesirable (or persistence) traits         | 12          |
| 5. Resource exploitation                       | 2           |
| 6. Reproduction                                | 7           |
| 7. Dispersal mechanisms                        | 9           |
| 8. Tolerance attributes                        | 6           |
| <b>C. Climate change</b>                       | <b>6</b>    |
| 9. Climate change                              | 6           |
| Sectors affected                               |             |
| <b>Commercial</b>                              | <b>7</b>    |
| <b>Environmental</b>                           | <b>2</b>    |
| <b>Species or population nuisance traits</b>   | <b>-1</b>   |

| Thresholds     |             |
|----------------|-------------|
| <b>BRA</b>     | <b>-</b>    |
| <b>BRA+CCA</b> | <b>-</b>    |
| Confidence     |             |
| <b>BRA+CCA</b> | <b>0.71</b> |
| <b>BRA</b>     | <b>0.71</b> |
| <b>CCA</b>     | <b>0.75</b> |

| Date and Time       |  |
|---------------------|--|
| 13/05/2021 20:51:02 |  |

## AS-ISK v2

| Taxon and Assessor details         |                                         |
|------------------------------------|-----------------------------------------|
| Category                           | Fishes and Lampreys (freshwater)        |
| Taxon name                         | <i>Salvelinus alpinus</i>               |
| Common name                        | Arctic charr                            |
| Assessor                           | Tamara Kanjuh                           |
| Risk screening context             |                                         |
| Reason and socio-economic benefits |                                         |
| Risk assessment area               | Danube & Adriatic basins BA, HR, ME, RS |
| Taxonomy                           |                                         |
| Native range                       |                                         |
| Introduced range                   |                                         |
| URL                                |                                         |

|                                                |      | Response                                                                                                                                                                | Justification (references and/or other information) | Confidence                                                                                                                                                                                                                                                                                                                                                                                                                                                                                                                                                                                   |           |
|------------------------------------------------|------|-------------------------------------------------------------------------------------------------------------------------------------------------------------------------|-----------------------------------------------------|----------------------------------------------------------------------------------------------------------------------------------------------------------------------------------------------------------------------------------------------------------------------------------------------------------------------------------------------------------------------------------------------------------------------------------------------------------------------------------------------------------------------------------------------------------------------------------------------|-----------|
| A. Biogeography/Historical                     |      |                                                                                                                                                                         |                                                     |                                                                                                                                                                                                                                                                                                                                                                                                                                                                                                                                                                                              |           |
| 1. Domestication/Cultivation                   |      |                                                                                                                                                                         |                                                     |                                                                                                                                                                                                                                                                                                                                                                                                                                                                                                                                                                                              |           |
| 1                                              | 1.01 | Has the taxon been the subject of domestication (or cultivation) for at least 20 generations?                                                                           | Yes                                                 | The first known introduction of charr in the Balkans likely dates back to 1928, when <i>Salvelinus</i> sp. from Italy was introduced to Krnsko Lake in Slovenia. The second introduction to Slovenia from Austria occurred in 1943 in Bohinj Lake for sport fishing purposes (Povž&Ocvirk, 1990).                                                                                                                                                                                                                                                                                            | Very high |
| 2                                              | 1.02 | Is the taxon harvested in the wild and likely to be sold or used in its live form?                                                                                      | Yes                                                 | <i>Salvelinus alpinus</i> is used for commercial purposes ( <a href="https://www.fishbase.de/summary/Salvelinus-alpinus.html">https://www.fishbase.de/summary/Salvelinus-alpinus.html</a> )                                                                                                                                                                                                                                                                                                                                                                                                  | Very high |
| 3                                              | 1.03 | Does the taxon have invasive races, varieties, sub-taxa or congeners?                                                                                                   | No                                                  | No information found.                                                                                                                                                                                                                                                                                                                                                                                                                                                                                                                                                                        | Low       |
| 2. Climate, distribution and introduction risk |      |                                                                                                                                                                         |                                                     |                                                                                                                                                                                                                                                                                                                                                                                                                                                                                                                                                                                              |           |
| 4                                              | 2.01 | How similar are the climatic conditions of the Risk Assessment (RA) area and the taxon's native range?                                                                  | Low                                                 | Dfa, Dfb (Köppen–Geiger climate classification system)                                                                                                                                                                                                                                                                                                                                                                                                                                                                                                                                       | Medium    |
| 5                                              | 2.02 | What is the quality of the climate matching data?                                                                                                                       | High                                                | Köppen–Geiger climate classification system                                                                                                                                                                                                                                                                                                                                                                                                                                                                                                                                                  | High      |
| 6                                              | 2.03 | Is the taxon already present outside of captivity in the RA area?                                                                                                       | Yes                                                 | The Serbian literature refers to <i>S. alpinus</i> as an introduced species, first in Kokin Brod reservoir in 1943, then later in Vlasina Lake (Simonović, 2006).                                                                                                                                                                                                                                                                                                                                                                                                                            | Very high |
| 7                                              | 2.04 | How many potential vectors could the taxon use to enter in the RA area?                                                                                                 | One                                                 | Aquaculture (Piria et al., 2017)                                                                                                                                                                                                                                                                                                                                                                                                                                                                                                                                                             | Very high |
| 8                                              | 2.05 | Is the taxon currently found in close proximity to, and likely to enter into, the RA area in the near future (e.g. unintentional and intentional introductions)?        | Yes                                                 | The taxon is found in the RA region (Piria et al., 2017)                                                                                                                                                                                                                                                                                                                                                                                                                                                                                                                                     | Very high |
| 3. Invasive elsewhere                          |      |                                                                                                                                                                         |                                                     |                                                                                                                                                                                                                                                                                                                                                                                                                                                                                                                                                                                              |           |
| 9                                              | 3.01 | Has the taxon become naturalised (established viable populations) outside its                                                                                           | Yes                                                 | There are allegations that charr is very well adapted to environmental conditions in RA (Vuković&Kosorić)                                                                                                                                                                                                                                                                                                                                                                                                                                                                                    | Medium    |
| 10                                             | 3.02 | In the taxon's introduced range, are there known adverse impacts to wild stocks or commercial taxa?                                                                     | Yes                                                 | Due to the diet, they can affect the availability of prey (Klementsen et al., 2003).                                                                                                                                                                                                                                                                                                                                                                                                                                                                                                         | Low       |
| 11                                             | 3.03 | In the taxon's introduced range, are there known adverse impacts to aquaculture?                                                                                        | No                                                  | No information found.                                                                                                                                                                                                                                                                                                                                                                                                                                                                                                                                                                        | Low       |
| 12                                             | 3.04 | In the taxon's introduced range, are there known adverse impacts to ecosystem                                                                                           | No                                                  | No information found.                                                                                                                                                                                                                                                                                                                                                                                                                                                                                                                                                                        | Low       |
| 13                                             | 3.05 | In the taxon's introduced range, are there known adverse socio-economic impacts?                                                                                        | No                                                  | No information found.                                                                                                                                                                                                                                                                                                                                                                                                                                                                                                                                                                        | Low       |
| B. Biology/Ecology                             |      |                                                                                                                                                                         |                                                     |                                                                                                                                                                                                                                                                                                                                                                                                                                                                                                                                                                                              |           |
| 4. Undesirable (or persistence) traits         |      |                                                                                                                                                                         |                                                     |                                                                                                                                                                                                                                                                                                                                                                                                                                                                                                                                                                                              |           |
| 14                                             | 4.01 | Is it likely that the taxon will be poisonous or pose other risks to human health?                                                                                      | No                                                  | There are no known negative impacts of arctic char on humans (Freyhof&Kottelat, 2008).                                                                                                                                                                                                                                                                                                                                                                                                                                                                                                       | Very high |
| 15                                             | 4.02 | Is it likely that the taxon will smother one or more native taxa (that are not threatened or protected)?                                                                | No                                                  | Food competition.                                                                                                                                                                                                                                                                                                                                                                                                                                                                                                                                                                            | Low       |
| 16                                             | 4.03 | Are there any threatened or protected taxa that the non-native taxon would parasitise in the RA area?                                                                   | No                                                  | Arctic char are motile and natatorial ( <a href="https://animaldiversity.org/accounts/Salvelinus_alpinus/#09E5637A-B5CA-11E8-A12E-005056AB59D3">https://animaldiversity.org/accounts/Salvelinus_alpinus/#09E5637A-B5CA-11E8-A12E-005056AB59D3</a> ).                                                                                                                                                                                                                                                                                                                                         | Very high |
| 17                                             | 4.04 | Is the taxon adaptable in terms of climatic and other environmental conditions, thus enhancing its potential persistence if it has invaded or could invade the RA area? | No                                                  | Although there is some evidence for thermal adaptation to very low temperatures in cold rivers (mean annual temperature <6.5°C), there is no corresponding adaptation to increasing temperature, even in a hot geothermal river. When water temperatures exceed 22–28°C for <i>S. salar</i> , 22–25°C for <i>S. trutta</i> and 22–23°C for <i>S. alpinus</i> , the fishes will soon die unless they can move to cooler water. Deep pools with cooler water near the bottom serve as refugia in streams and rivers and should be maintained or even created when scarce (Elliot et al., 2010) | High      |
| 18                                             | 4.05 | Is the taxon likely to disrupt food-web structure/function in aquatic ecosystems if it has invaded or is likely to invade the RA area?                                  | Yes                                                 | In 10 Norwegian charr lakes, Langeland (1978) found that charr selected cladocerans above copepods and that increasing predation had negative effects on large cladocerans and also affected the size of two important prey species.                                                                                                                                                                                                                                                                                                                                                         | Very high |
| 19                                             | 4.06 | Is the taxon likely to exert adverse impacts on ecosystem services in the RA area?                                                                                      | No                                                  | No information found.                                                                                                                                                                                                                                                                                                                                                                                                                                                                                                                                                                        | Low       |
| 20                                             | 4.07 | Is it likely that the taxon will host, and/or act as a vector for, recognised pests and infectious agents that are endemic in the RA                                    | No                                                  | No information found.                                                                                                                                                                                                                                                                                                                                                                                                                                                                                                                                                                        | Low       |
| 21                                             | 4.08 | Is it likely that the taxon will host, and/or act as a vector for, recognised pests and infectious agents that are absent from (novel to) the RA area?                  | No                                                  | No information found.                                                                                                                                                                                                                                                                                                                                                                                                                                                                                                                                                                        | Low       |
| 22                                             | 4.09 | Is it likely that the taxon will achieve a body size that will make it more likely to be released from captivity?                                                       | No                                                  | No information found.                                                                                                                                                                                                                                                                                                                                                                                                                                                                                                                                                                        | Low       |

|                                 |      |                                                                                                                                                                                           |     |                                                                                                                                                                                                                                                                                                                                       |           |
|---------------------------------|------|-------------------------------------------------------------------------------------------------------------------------------------------------------------------------------------------|-----|---------------------------------------------------------------------------------------------------------------------------------------------------------------------------------------------------------------------------------------------------------------------------------------------------------------------------------------|-----------|
| 23                              | 4.10 | Is the taxon capable of sustaining itself in a range of water velocity conditions (e.g. versatile in habitat use)?                                                                        | Yes | The study of Grnbaum et al. (2008) showed that the use of a higher water velocity immediately after hatching is associated with a significant increase in growth.                                                                                                                                                                     | Very high |
| 24                              | 4.11 | Is it likely that the taxon's mode of existence (e.g. excretion of by-products) or behaviours (e.g. feeding) will reduce habitat quality for native taxa?                                 | Yes | In a 6-year experimental study in one lake, Langeland (1982) found that predation from charr changed the zooplankton community from large- to small-sized species. The predation also affected body size and the production of resting eggs in cladocerans negatively (Klementsen et al., 2003).                                      | Very high |
| 25                              | 4.12 | Is the taxon likely to maintain a viable population even when present in low densities (or persisting in adverse conditions by way of a dormant form)?                                    | No  | No information found.                                                                                                                                                                                                                                                                                                                 | Low       |
| <b>5. Resource exploitation</b> |      |                                                                                                                                                                                           |     |                                                                                                                                                                                                                                                                                                                                       |           |
| 26                              | 5.01 | Is the taxon likely to consume threatened or protected native taxa in the RA area?                                                                                                        | No  | No information found.                                                                                                                                                                                                                                                                                                                 | Low       |
| 27                              | 5.02 | Is the taxon likely to sequester food resources (including nutrients) to the detriment of native taxa in the RA area?                                                                     | Yes | In addition to the diet, there is a possibility that the taxon will use the available resources to the detriment of native species (Klementsen et al., 2003)                                                                                                                                                                          | Medium    |
| <b>6. Reproduction</b>          |      |                                                                                                                                                                                           |     |                                                                                                                                                                                                                                                                                                                                       |           |
| 28                              | 6.01 | Is the taxon likely to exhibit parental care and/or to reduce age-at-maturity in response to environmental conditions?                                                                    | No  | No parental involvement ( <a href="https://animaldiversity.org/accounts/Salvelinus_alpinus/">https://animaldiversity.org/accounts/Salvelinus_alpinus/</a> ).                                                                                                                                                                          | Medium    |
| 29                              | 6.02 | Is the taxon likely to produce viable gametes or propagules (in the RA area)?                                                                                                             | Yes | The literature points out that the taxon is adapted to the conditions in RA (Vuković&Kosorić)                                                                                                                                                                                                                                         | Low       |
| 30                              | 6.03 | Is the taxon likely to hybridise naturally with native taxa?                                                                                                                              | Yes | Salvelinus alpinus x Salmo trutta (Chevassus, 1979).                                                                                                                                                                                                                                                                                  | Medium    |
| 31                              | 6.04 | Is the taxon likely to be hermaphroditic or to display asexual reproduction?                                                                                                              | No  | No information found.                                                                                                                                                                                                                                                                                                                 | Medium    |
| 32                              | 6.05 | Is the taxon dependent on the presence of another taxon (or specific habitat features) to complete its life cycle?                                                                        | No  | No information found.                                                                                                                                                                                                                                                                                                                 | Low       |
| 33                              | 6.06 | Is the taxon known (or likely) to produce a large number of propagules or offspring within a short time span (e.g. < 1 year)?                                                             | Yes | Range number of offspring: 2,500 to 8,500 ( <a href="https://animaldiversity.org/accounts/Salvelinus_alpinus/">https://animaldiversity.org/accounts/Salvelinus_alpinus/</a> )                                                                                                                                                         | High      |
| 34                              | 6.07 | How many time units (days, months, years) does the taxon require to reach the age-at-first-reproduction?                                                                                  | 4   | Sexual maturity in arctic char ranges from 4 years to 10 years old, usually when they reach around 500-600 mm in length ( <a href="https://animaldiversity.org/accounts/Salvelinus_alpinus/#4D908FB0-CA64-11E8-AE5C-005056AB59D3">https://animaldiversity.org/accounts/Salvelinus_alpinus/#4D908FB0-CA64-11E8-AE5C-005056AB59D3</a> ) | Very high |
| <b>7. Dispersal mechanisms</b>  |      |                                                                                                                                                                                           |     |                                                                                                                                                                                                                                                                                                                                       |           |
| 35                              | 7.01 | How many potential internal vectors/pathways could the taxon use to disperse within the RA area (with suitable vectors)?                                                                  | >1  | Aquaculture, sport fishing (Piria et al., 2017)                                                                                                                                                                                                                                                                                       | High      |
| 36                              | 7.02 | Will any of these vectors/pathways bring the taxon in close proximity to one or more protected areas (e.g. MCZ, MPA, SSSI)?                                                               | Yes | One of the first places where the taxon was introduced in Serbia is Kokin Brod, which belongs to the Uvac Special Nature Reserve (Piria et al., 2017)                                                                                                                                                                                 | High      |
| 37                              | 7.03 | Does the taxon have a means of actively attaching itself to hard substrata (e.g. ship hulls, pilings, buoys) such that it enhances the likelihood of dispersal?                           | No  | No information found.                                                                                                                                                                                                                                                                                                                 | Medium    |
| 38                              | 7.04 | Is natural dispersal of the taxon likely to occur as eggs (for animals) or as propagules (for plants: seeds, spores) in the RA area?                                                      | No  | No information found.                                                                                                                                                                                                                                                                                                                 | Low       |
| 39                              | 7.05 | Is natural dispersal of the taxon likely to occur as larvae/juveniles (for animals) or as fragments/seedlings (for plants) in the RA area?                                                | Yes | The dispersal could occur in the juvenile stages (Janjua et al., 2010).                                                                                                                                                                                                                                                               | Medium    |
| 40                              | 7.06 | Are older life stages of the taxon likely to migrate in the RA area for reproduction?                                                                                                     | Yes | Anadromus and semi-anadromus, fluvial-lacustrine and dwarf stocks are known (Kottelat&Freyhof, 2007)                                                                                                                                                                                                                                  | High      |
| 41                              | 7.07 | Are propagules or eggs of the taxon likely to be dispersed in the RA area by other animals?                                                                                               | No  | No information found.                                                                                                                                                                                                                                                                                                                 | Low       |
| 42                              | 7.08 | Is dispersal of the taxon along any of the vectors/pathways mentioned in the previous seven questions (35-41; i.e. both unintentional or intentional) likely to be?                       | Yes | Literary references indicate the release of the taxon into the water by anglers or his escape from the farm (Piria et al., 2017 - D.Jelić, personal communication)                                                                                                                                                                    | Very high |
| 43                              | 7.09 | Is dispersal of the taxon density dependent?                                                                                                                                              | No  | Characteristics that make these species suitable for commercial farming in cold-water recirculating aquaculture systems include tolerance of <i>S. alpinus</i> to high density culture (Prokešova et al., 2017)                                                                                                                       | Very high |
| <b>8. Tolerance attributes</b>  |      |                                                                                                                                                                                           |     |                                                                                                                                                                                                                                                                                                                                       |           |
| 44                              | 8.01 | Is the taxon able to withstand being out of water for extended periods (e.g. minimum of one or more hours) at some stage of its life cycle?                                               | No  | No information found.                                                                                                                                                                                                                                                                                                                 | Medium    |
| 45                              | 8.02 | Is the taxon tolerant of a wide range of water quality conditions relevant to that taxon? [In the Justification field, indicate the relevant water quality variable(s) being tolerant of] | Yes | Dong et al. (2011) reviewed that hyperoxia may enhance food intake, feed conversion efficiency, growth performance, survival, and tolerance to ammonia.                                                                                                                                                                               | Medium    |
| 46                              | 8.03 | Can the taxon be controlled or eradicated in the wild with chemical, biological, or other agents/means?                                                                                   | No  | No information found.                                                                                                                                                                                                                                                                                                                 | Low       |
| 47                              | 8.04 | Is the taxon likely to tolerate or benefit from environmental/human disturbance?                                                                                                          | No  | No information found.                                                                                                                                                                                                                                                                                                                 | Low       |
| 48                              | 8.05 | Is the taxon able to tolerate salinity levels that are higher or lower than those found in its usual environment?                                                                         | Yes | The taxon includes anadromus and semi-anadromus species (Kottelat&Freyhof, 2007)                                                                                                                                                                                                                                                      | Medium    |
| 49                              | 8.06 | Are there effective natural enemies (predators) of the taxon present in the RA area?                                                                                                      | Yes | Humans ( <a href="https://animaldiversity.org/accounts/Salvelinus_alpinus/#4D908FB0-CA64-11E8-AE5C-005056AB59D3">https://animaldiversity.org/accounts/Salvelinus_alpinus/#4D908FB0-CA64-11E8-AE5C-005056AB59D3</a> )                                                                                                                  | Medium    |
| <b>C. Climate change</b>        |      |                                                                                                                                                                                           |     |                                                                                                                                                                                                                                                                                                                                       |           |
| <b>9. Climate change</b>        |      |                                                                                                                                                                                           |     |                                                                                                                                                                                                                                                                                                                                       |           |



|    |      |                                                                                                                                                              |           |                                                             |        |
|----|------|--------------------------------------------------------------------------------------------------------------------------------------------------------------|-----------|-------------------------------------------------------------|--------|
| 50 | 9.01 | Under the predicted future climatic conditions, are the risks of entry into the RA area posed by the taxon likely to increase, decrease or not change?       | No change | There are no significant differences Elliot et al., 2010).  | Medium |
| 51 | 9.02 | Under the predicted future climatic conditions, are the risks of establishment posed by the taxon likely to increase, decrease or not change?                | No change | There are no significant differences Elliot et al., 2010).  | Medium |
| 52 | 9.03 | Under the predicted future climatic conditions, are the risks of dispersal within the RA area posed by the taxon likely to increase, decrease or not change? | No change | There are no significant differences Elliot et al., 2010).  | Medium |
| 53 | 9.04 | Under the predicted future climatic conditions, what is the likely magnitude of future potential impacts on biodiversity and/or ecological integrity/status? | No change | There are no significant differences Elliot et al., 2010).  | Medium |
| 54 | 9.05 | Under the predicted future climatic conditions, what is the likely magnitude of future potential impacts on ecosystem structure and/or function?             | No change | There are no significant differences Elliot et al., 2010).  | Medium |
| 55 | 9.06 | Under the predicted future climatic conditions, what is the likely magnitude of future potential impacts on ecosystem services/socio-economic factors?       | Lower     | There are no significant differences (Elliot et al., 2010). | Medium |

| Statistics                                     |             |
|------------------------------------------------|-------------|
| Scores                                         |             |
| <b>BRA</b>                                     | <b>13.5</b> |
| <b>BRA Outcome</b>                             | <b>-</b>    |
| <b>BRA+CCA</b>                                 | <b>11.5</b> |
| <b>BRA+CCA Outcome</b>                         | <b>-</b>    |
| Score partition                                |             |
| <b>A. Biogeography/Historical</b>              | <b>4.5</b>  |
| 1. Domestication/Cultivation                   | 2.0         |
| 2. Climate, distribution and introduction risk | 1.0         |
| 3. Invasive elsewhere                          | 1.5         |
| <b>B. Biology/Ecology</b>                      | <b>9.0</b>  |
| 4. Undesirable (or persistence) traits         | 2.0         |
| 5. Resource exploitation                       | 2.0         |
| 6. Reproduction                                | 2.0         |
| 7. Dispersal mechanisms                        | 2.0         |
| 8. Tolerance attributes                        | 1.0         |
| <b>C. Climate change</b>                       | <b>-2.0</b> |
| 9. Climate change                              | -2.0        |
| Answered Questions                             |             |
| <b>Total</b>                                   | <b>55</b>   |
| <b>A. Biogeography/Historical</b>              | <b>13</b>   |
| 1. Domestication/Cultivation                   | 3           |
| 2. Climate, distribution and introduction risk | 5           |
| 3. Invasive elsewhere                          | 5           |
| <b>B. Biology/Ecology</b>                      | <b>36</b>   |
| 4. Undesirable (or persistence) traits         | 12          |
| 5. Resource exploitation                       | 2           |
| 6. Reproduction                                | 7           |
| 7. Dispersal mechanisms                        | 9           |
| 8. Tolerance attributes                        | 6           |
| <b>C. Climate change</b>                       | <b>6</b>    |
| 9. Climate change                              | 6           |
| Sectors affected                               |             |
| <b>Commercial</b>                              | <b>5</b>    |
| <b>Environmental</b>                           | <b>3</b>    |
| <b>Species or population nuisance traits</b>   | <b>8</b>    |

| Thresholds     |             |
|----------------|-------------|
| <b>BRA</b>     | <b>-</b>    |
| <b>BRA+CCA</b> | <b>-</b>    |
| Confidence     |             |
| <b>BRA+CCA</b> | <b>0.56</b> |
| <b>BRA</b>     | <b>0.57</b> |
| <b>CCA</b>     | <b>0.50</b> |

| Date and Time       |  |
|---------------------|--|
| 28/05/2021 09:06:26 |  |

## AS-ISK v2

| Taxon and Assessor details         |                                         |
|------------------------------------|-----------------------------------------|
| Category                           | Fishes and Lampreys (freshwater)        |
| Taxon name                         | <i>Salvelinus alpinus</i>               |
| Common name                        | Arctic charr                            |
| Assessor                           | Tena Radocaj                            |
| Risk screening context             |                                         |
| Reason and socio-economic benefits |                                         |
| Risk assessment area               | Danube & Adriatic basins BA, HR, ME, RS |
| Taxonomy                           |                                         |
| Native range                       |                                         |
| Introduced range                   |                                         |
| URL                                |                                         |

|                                                |      | Response                                                                                                                                                                | Justification (references and/or other information) | Confidence                                                                                                                                                                                                                                                                                                                                                                                                                                                                                                                                                                                                                                 |           |
|------------------------------------------------|------|-------------------------------------------------------------------------------------------------------------------------------------------------------------------------|-----------------------------------------------------|--------------------------------------------------------------------------------------------------------------------------------------------------------------------------------------------------------------------------------------------------------------------------------------------------------------------------------------------------------------------------------------------------------------------------------------------------------------------------------------------------------------------------------------------------------------------------------------------------------------------------------------------|-----------|
| A. Biogeography/Historical                     |      |                                                                                                                                                                         |                                                     |                                                                                                                                                                                                                                                                                                                                                                                                                                                                                                                                                                                                                                            |           |
| 1. Domestication/Cultivation                   |      |                                                                                                                                                                         |                                                     |                                                                                                                                                                                                                                                                                                                                                                                                                                                                                                                                                                                                                                            |           |
| 1                                              | 1.01 | Has the taxon been the subject of domestication (or cultivation) for at least 20 generations?                                                                           | Yes                                                 | Kottelat, M. and J. Freyhof 2007 Handbook of European freshwater fishes. Publications Kottelat, Cornol, Switzerland. This species introduced only in Croatia; Knin fish farm                                                                                                                                                                                                                                                                                                                                                                                                                                                               | Very high |
| 2                                              | 1.02 | Is the taxon harvested in the wild and likely to be sold or used in its live form?                                                                                      | Yes                                                 | S.alpinus used for human consumption. (Kapetanović, D., Vardić, I., Valić, D., & Teskeredz´ić, E. (2010). Furunculosis in cultured Arctic charr (Salvelinus alpinus) in Croatia. Aquaculture research, 41(10), e719-e721.)                                                                                                                                                                                                                                                                                                                                                                                                                 | Low       |
| 3                                              | 1.03 | Does the taxon have invasive races, varieties, sub-taxa or congeners?                                                                                                   | No                                                  | Kottelat, M. and J. Freyhof 2007 Handbook of European freshwater fishes. Publications Kottelat, Cornol, Switzerland.                                                                                                                                                                                                                                                                                                                                                                                                                                                                                                                       | Very high |
| 2. Climate, distribution and introduction risk |      |                                                                                                                                                                         |                                                     |                                                                                                                                                                                                                                                                                                                                                                                                                                                                                                                                                                                                                                            |           |
| 4                                              | 2.01 | How similar are the climatic conditions of the Risk Assessment (RA) area and the taxon's native range?                                                                  | High                                                | Kottelat, M. and J. Freyhof 2007 Handbook of European freshwater fishes. Publications Kottelat, Cornol, Switzerland. I use climatch. The similarity between climatic conditions RA area and native                                                                                                                                                                                                                                                                                                                                                                                                                                         | High      |
| 5                                              | 2.02 | What is the quality of the climate matching data?                                                                                                                       | High                                                | Kottelat, M. and J. Freyhof 2007 Handbook of European freshwater fishes. Publications Kottelat, Cornol, Switzerland. The quality of the climate matching data is high.                                                                                                                                                                                                                                                                                                                                                                                                                                                                     | High      |
| 6                                              | 2.03 | Is the taxon already present outside of captivity in the RA area?                                                                                                       | Yes                                                 | In Croatia, arctic charr Salvelinus alpinus (Linnaeus, 1758) was introduced from Bohinj Lake to Kozjak Lake (one of the Plitvice Lakes) in 1963 (Pažur 1970). Later, anglers released arctic charr in several inland waters, including the Ruda River in the 1980s (Josip Budinski, pers. comm.), or specimens escaped from farms, though the distribution of this species has not yet been revised (D. Jelić, pers. comm.). 8Pofuk, M., Zanella, D., & Piria, M. (2017). An overview of the translocated native and non-native fish species in Croatia: pathways, impacts and management. Management of biological invasions. 8(3). 425.) | High      |
| 7                                              | 2.04 | How many potential vectors could the taxon use to enter in the RA area?                                                                                                 | None                                                | This species is present in Croatia                                                                                                                                                                                                                                                                                                                                                                                                                                                                                                                                                                                                         | Very high |
| 8                                              | 2.05 | Is the taxon currently found in close proximity to, and likely to enter into, the RA area in the near future (e.g. unintentional and intentional introductions)?        | Not applicable                                      | This species is present in Croatia                                                                                                                                                                                                                                                                                                                                                                                                                                                                                                                                                                                                         | Very high |
| 3. Invasive elsewhere                          |      |                                                                                                                                                                         |                                                     |                                                                                                                                                                                                                                                                                                                                                                                                                                                                                                                                                                                                                                            |           |
| 9                                              | 3.01 | Has the taxon become naturalised (established viable populations) outside its                                                                                           | Yes                                                 | Kottelat, M. and J. Freyhof 2007 Handbook of European freshwater fishes. Publications Kottelat, Cornol, Switzerland.                                                                                                                                                                                                                                                                                                                                                                                                                                                                                                                       | Very high |
| 10                                             | 3.02 | In the taxon's introduced range, are there known adverse impacts to wild stocks or commercial taxa?                                                                     | Yes                                                 | Kottelat, M. and J. Freyhof 2007 Handbook of European freshwater fishes. Publications Kottelat, Cornol, Switzerland.                                                                                                                                                                                                                                                                                                                                                                                                                                                                                                                       | High      |
| 11                                             | 3.03 | In the taxon's introduced range, are there known adverse impacts to aquaculture?                                                                                        | Yes                                                 | Kottelat, M. and J. Freyhof 2007 Handbook of European freshwater fishes. Publications Kottelat, Cornol, Switzerland.                                                                                                                                                                                                                                                                                                                                                                                                                                                                                                                       | Medium    |
| 12                                             | 3.04 | In the taxon's introduced range, are there known adverse impacts to ecosystem                                                                                           | Yes                                                 | Kottelat, M. and J. Freyhof 2007 Handbook of European freshwater fishes. Publications Kottelat, Cornol, Switzerland.                                                                                                                                                                                                                                                                                                                                                                                                                                                                                                                       | Low       |
| 13                                             | 3.05 | In the taxon's introduced range, are there known adverse socio-economic impacts?                                                                                        | No                                                  | no data                                                                                                                                                                                                                                                                                                                                                                                                                                                                                                                                                                                                                                    | Low       |
| B. Biology/Ecology                             |      |                                                                                                                                                                         |                                                     |                                                                                                                                                                                                                                                                                                                                                                                                                                                                                                                                                                                                                                            |           |
| 4. Undesirable (or persistence) traits         |      |                                                                                                                                                                         |                                                     |                                                                                                                                                                                                                                                                                                                                                                                                                                                                                                                                                                                                                                            |           |
| 14                                             | 4.01 | Is it likely that the taxon will be poisonous or pose other risks to human health?                                                                                      | No                                                  | Kottelat, M. and J. Freyhof 2007 Handbook of European freshwater fishes. Publications Kottelat, Cornol, Switzerland.                                                                                                                                                                                                                                                                                                                                                                                                                                                                                                                       | Very high |
| 15                                             | 4.02 | Is it likely that the taxon will smother one or more native taxa (that are not threatened or protected)?                                                                | Yes                                                 | Kottelat, M. and J. Freyhof 2007 Handbook of European freshwater fishes. Publications Kottelat, Cornol, Switzerland.                                                                                                                                                                                                                                                                                                                                                                                                                                                                                                                       | Medium    |
| 16                                             | 4.03 | Are there any threatened or protected taxa that the non-native taxon would parasitise in the RA area?                                                                   | No                                                  | Kottelat, M. and J. Freyhof 2007 Handbook of European freshwater fishes. Publications Kottelat, Cornol, Switzerland.                                                                                                                                                                                                                                                                                                                                                                                                                                                                                                                       | Very high |
| 17                                             | 4.04 | Is the taxon adaptable in terms of climatic and other environmental conditions, thus enhancing its potential persistence if it has invaded or could invade the RA area? | Yes                                                 | This species adaptable in terms of climatic and other environmental conditions.                                                                                                                                                                                                                                                                                                                                                                                                                                                                                                                                                            | Medium    |
| 18                                             | 4.05 | Is the taxon likely to disrupt food-web structure/function in aquatic ecosystems if it has invaded or is likely to invade the RA                                        | No                                                  | No data                                                                                                                                                                                                                                                                                                                                                                                                                                                                                                                                                                                                                                    | Low       |
| 19                                             | 4.06 | Is the taxon likely to exert adverse impacts on ecosystem services in the RA area?                                                                                      | No                                                  | no data                                                                                                                                                                                                                                                                                                                                                                                                                                                                                                                                                                                                                                    | Low       |
| 20                                             | 4.07 | Is it likely that the taxon will host, and/or act as a vector for, recognised pests and infectious agents that are endemic in the RA                                    | Yes                                                 | Yes, the taxon may be a host or vector of known pests and infectious agents endemic to RA area. Because in every area exist infectious agents and pests.                                                                                                                                                                                                                                                                                                                                                                                                                                                                                   | Low       |

|                                 |      |                                                                                                                                                                              |                |                                                                                                                                                                                                                                                                                                                                                                                                                                                                                                                                                                                                                                                                                                           |           |
|---------------------------------|------|------------------------------------------------------------------------------------------------------------------------------------------------------------------------------|----------------|-----------------------------------------------------------------------------------------------------------------------------------------------------------------------------------------------------------------------------------------------------------------------------------------------------------------------------------------------------------------------------------------------------------------------------------------------------------------------------------------------------------------------------------------------------------------------------------------------------------------------------------------------------------------------------------------------------------|-----------|
| 21                              | 4.08 | Is it likely that the taxon will host, and/or act as a vector for, recognised pests and infectious agents that are absent from (novel to) the RA area?                       | Yes            | Furunculosis, caused by <i>Aeromonas salmonicida</i> , is probably the most abundant disease in European aquaculture. Crane and Hyatt (2011) report that <i>Salvelinus alpinus</i> can be infected with infectious salmon anemia virus. According to Froese and Pauly (2018b), <i>Salvelinus alpinus</i> is a host for <i>Abothrium crissum</i> , <i>Caligus elongatus</i> , <i>Diphyllobothrium dendriticum</i> , <i>D. ditremum</i> , <i>D. salvelini</i> . 8Froese, R., and D. Pauly, editors. 2018a. <i>Salvelinus alpinus</i> (Linnaeus, 1758). FishBase. Available: <a href="https://www.fishbase.de/summary/Salvelinus-alpinus.html">https://www.fishbase.de/summary/Salvelinus-alpinus.html</a> . | Medium    |
| 22                              | 4.09 | Is it likely that the taxon will achieve a body size that will make it more likely to be released from captivity?                                                            | Yes            | Kottelat, M. and J. Freyhof 2007 Handbook of European freshwater fishes. Publications Kottelat, Cornol, Switzerland.                                                                                                                                                                                                                                                                                                                                                                                                                                                                                                                                                                                      | Very high |
| 23                              | 4.10 | Is the taxon capable of sustaining itself in a range of water velocity conditions (e.g. versatile in habitat use)?                                                           | Yes            | Kottelat, M. and J. Freyhof 2007 Handbook of European freshwater fishes. Publications Kottelat, Cornol, Switzerland.                                                                                                                                                                                                                                                                                                                                                                                                                                                                                                                                                                                      | Very high |
| 24                              | 4.11 | Is it likely that the taxon's mode of existence (e.g. excretion of by-products) or behaviours (e.g. feeding) will reduce habitat quality for native taxa?                    | No             | Kottelat, M. and J. Freyhof 2007 Handbook of European freshwater fishes. Publications Kottelat, Cornol, Switzerland.                                                                                                                                                                                                                                                                                                                                                                                                                                                                                                                                                                                      | High      |
| 25                              | 4.12 | Is the taxon likely to maintain a viable population even when present in low densities (or persisting in adverse conditions by way of a dormant form)?                       | Yes            | Kottelat, M. and J. Freyhof 2007 Handbook of European freshwater fishes. Publications Kottelat, Cornol, Switzerland.                                                                                                                                                                                                                                                                                                                                                                                                                                                                                                                                                                                      | Medium    |
| <b>5. Resource exploitation</b> |      |                                                                                                                                                                              |                |                                                                                                                                                                                                                                                                                                                                                                                                                                                                                                                                                                                                                                                                                                           |           |
| 26                              | 5.01 | Is the taxon likely to consume threatened or protected native taxa in the RA area?                                                                                           | Yes            | It is possible that it consume endangered and protected native taxa in the RA area. If there are protected taxa in the RA area will consume them, whether or not the taxon is endangered.                                                                                                                                                                                                                                                                                                                                                                                                                                                                                                                 | Low       |
| 27                              | 5.02 | Is the taxon likely to sequester food resources (including nutrients) to the detriment of native taxa in the RA area?                                                        | Not applicable | not applicable                                                                                                                                                                                                                                                                                                                                                                                                                                                                                                                                                                                                                                                                                            | Very high |
| <b>6. Reproduction</b>          |      |                                                                                                                                                                              |                |                                                                                                                                                                                                                                                                                                                                                                                                                                                                                                                                                                                                                                                                                                           |           |
| 28                              | 6.01 | Is the taxon likely to exhibit parental care and/or to reduce age-at-maturity in response to environmental conditions?                                                       | No             | Kottelat, M. and J. Freyhof 2007 Handbook of European freshwater fishes. Publications Kottelat, Cornol, Switzerland.                                                                                                                                                                                                                                                                                                                                                                                                                                                                                                                                                                                      | High      |
| 29                              | 6.02 | Is the taxon likely to produce viable gametes or propagules (in the RA area)?                                                                                                | Yes            | Kottelat, M. and J. Freyhof 2007 Handbook of European freshwater fishes. Publications Kottelat, Cornol, Switzerland.                                                                                                                                                                                                                                                                                                                                                                                                                                                                                                                                                                                      | Low       |
| 30                              | 6.03 | Is the taxon likely to hybridise naturally with native taxa?                                                                                                                 | No             | Kottelat, M. and J. Freyhof 2007 Handbook of European freshwater fishes. Publications Kottelat, Cornol, Switzerland.                                                                                                                                                                                                                                                                                                                                                                                                                                                                                                                                                                                      | Low       |
| 31                              | 6.04 | Is the taxon likely to be hermaphroditic or to display asexual reproduction?                                                                                                 | No             | Kottelat, M. and J. Freyhof 2007 Handbook of European freshwater fishes. Publications Kottelat, Cornol, Switzerland.                                                                                                                                                                                                                                                                                                                                                                                                                                                                                                                                                                                      | Very high |
| 32                              | 6.05 | Is the taxon dependent on the presence of another taxon (or specific habitat features) to complete its life cycle?                                                           | No             | Kottelat, M. and J. Freyhof 2007 Handbook of European freshwater fishes. Publications Kottelat, Cornol, Switzerland.                                                                                                                                                                                                                                                                                                                                                                                                                                                                                                                                                                                      | Very high |
| 33                              | 6.06 | Is the taxon known (or likely) to produce a large number of propagules or offspring within a short time span (e.g. < 1 year)?                                                | No             | Kottelat, M. and J. Freyhof 2007 Handbook of European freshwater fishes. Publications Kottelat, Cornol, Switzerland.                                                                                                                                                                                                                                                                                                                                                                                                                                                                                                                                                                                      | High      |
| 34                              | 6.07 | How many time units (days, months, years) does the taxon require to reach the age-at-first-reproduction?                                                                     | 2              | Kottelat, M. and J. Freyhof 2007 Handbook of European freshwater fishes. Publications Kottelat, Cornol, Switzerland.                                                                                                                                                                                                                                                                                                                                                                                                                                                                                                                                                                                      | High      |
| <b>7. Dispersal mechanisms</b>  |      |                                                                                                                                                                              |                |                                                                                                                                                                                                                                                                                                                                                                                                                                                                                                                                                                                                                                                                                                           |           |
| 35                              | 7.01 | How many potential internal vectors/pathways could the taxon use to disperse within the RA area (with suitable vectors/pathways)?                                            | >1             | 1. human impact 2. flooding 3. natural spread via natural and manmade watercourses                                                                                                                                                                                                                                                                                                                                                                                                                                                                                                                                                                                                                        | Medium    |
| 36                              | 7.02 | Will any of these vectors/pathways bring the taxon in close proximity to one or more protected areas (e.g. MCZ, MPA, SSSI)?                                                  | No             | No any of this vectors/pathways bring the taxon in close proximity in the protected areas.                                                                                                                                                                                                                                                                                                                                                                                                                                                                                                                                                                                                                | Low       |
| 37                              | 7.03 | Does the taxon have a means of actively attaching itself to hard substrata (e.g. ship hulls, pilings, buoys) such that it enhances the likelihood of dispersal?              | No             | no                                                                                                                                                                                                                                                                                                                                                                                                                                                                                                                                                                                                                                                                                                        | Medium    |
| 38                              | 7.04 | Is natural dispersal of the taxon likely to occur as eggs (for animals) or as propagules (for plants: seeds, spores) in the RA area?                                         | No             | Kottelat, M. and J. Freyhof 2007 Handbook of European freshwater fishes. Publications Kottelat, Cornol, Switzerland.                                                                                                                                                                                                                                                                                                                                                                                                                                                                                                                                                                                      | High      |
| 39                              | 7.05 | Is natural dispersal of the taxon likely to occur as larvae/juveniles (for animals) or as fragments/seedlings (for plants) in the RA area?                                   | No             | Kottelat, M. and J. Freyhof 2007 Handbook of European freshwater fishes. Publications Kottelat, Cornol, Switzerland.                                                                                                                                                                                                                                                                                                                                                                                                                                                                                                                                                                                      | High      |
| 40                              | 7.06 | Are older life stages of the taxon likely to migrate in the RA area for reproduction?                                                                                        | Yes            | Kottelat, M. and J. Freyhof 2007 Handbook of European freshwater fishes. Publications Kottelat, Cornol, Switzerland.                                                                                                                                                                                                                                                                                                                                                                                                                                                                                                                                                                                      | Very high |
| 41                              | 7.07 | Are propagules or eggs of the taxon likely to be dispersed in the RA area by other animals?                                                                                  | No             | Kottelat, M. and J. Freyhof 2007 Handbook of European freshwater fishes. Publications Kottelat, Cornol, Switzerland.                                                                                                                                                                                                                                                                                                                                                                                                                                                                                                                                                                                      | Very high |
| 42                              | 7.08 | Is dispersal of the taxon along any of the vectors/pathways mentioned in the previous seven questions (35-41; i.e. both unintentional or intentional) likely to be           | Yes            | There is a possibility of a high rate of spread of taxa. Eg. if a fertilized individual enters a new area by any means of expansion.                                                                                                                                                                                                                                                                                                                                                                                                                                                                                                                                                                      | Low       |
| 43                              | 7.09 | Is dispersal of the taxon density dependent?                                                                                                                                 | No             | Kottelat, M. and J. Freyhof 2007 Handbook of European freshwater fishes. Publications Kottelat, Cornol, Switzerland.                                                                                                                                                                                                                                                                                                                                                                                                                                                                                                                                                                                      | High      |
| <b>8. Tolerance attributes</b>  |      |                                                                                                                                                                              |                |                                                                                                                                                                                                                                                                                                                                                                                                                                                                                                                                                                                                                                                                                                           |           |
| 44                              | 8.01 | Is the taxon able to withstand being out of water for extended periods (e.g. minimum of one or more hours) at some stage of its life cycle?                                  | No             | Kottelat, M. and J. Freyhof 2007 Handbook of European freshwater fishes. Publications Kottelat, Cornol, Switzerland.                                                                                                                                                                                                                                                                                                                                                                                                                                                                                                                                                                                      | Very high |
| 45                              | 8.02 | Is the taxon tolerant of a wide range of water quality conditions relevant to that taxon? [In the Justification field, indicate the relevant water quality variable(s) being | No             | Kottelat, M. and J. Freyhof 2007 Handbook of European freshwater fishes. Publications Kottelat, Cornol, Switzerland.                                                                                                                                                                                                                                                                                                                                                                                                                                                                                                                                                                                      | Very high |
| 46                              | 8.03 | Can the taxon be controlled or eradicated in the wild with chemical, biological, or other agents/means?                                                                      | Not applicable | No regulation in Croatia                                                                                                                                                                                                                                                                                                                                                                                                                                                                                                                                                                                                                                                                                  | Very high |
| 47                              | 8.04 | Is the taxon likely to tolerate or benefit from environmental/human disturbance?                                                                                             | No             | Kottelat, M. and J. Freyhof 2007 Handbook of European freshwater fishes. Publications Kottelat, Cornol, Switzerland.                                                                                                                                                                                                                                                                                                                                                                                                                                                                                                                                                                                      | High      |

|                          |      |                                                                                                                                                              |                |                                                                                                                                                                                                                                                                                                                                                                                                                                                         |           |
|--------------------------|------|--------------------------------------------------------------------------------------------------------------------------------------------------------------|----------------|---------------------------------------------------------------------------------------------------------------------------------------------------------------------------------------------------------------------------------------------------------------------------------------------------------------------------------------------------------------------------------------------------------------------------------------------------------|-----------|
| 48                       | 8.05 | Is the taxon able to tolerate salinity levels that are higher or lower than those found in its usual environment?                                            | Yes            | Kottelat, M. and J. Freyhof 2007 Handbook of European freshwater fishes. Publications Kottelat, Cornol, Switzerland.                                                                                                                                                                                                                                                                                                                                    | Very high |
| 49                       | 8.06 | Are there effective natural enemies (predators) of the taxon present in the RA area?                                                                         | No             | Brown trout and Pikeperch (Vilhunen, S., & Hirvonen, H. (2003). Innate antipredator responses of Arctic charr ( <i>Salvelinus alpinus</i> ) depend on predator species and their diet. Behavioral Ecology and Sociobiology, 55(1), 1-10.)                                                                                                                                                                                                               | Medium    |
| <b>C. Climate change</b> |      |                                                                                                                                                              |                |                                                                                                                                                                                                                                                                                                                                                                                                                                                         |           |
| <b>9. Climate change</b> |      |                                                                                                                                                              |                |                                                                                                                                                                                                                                                                                                                                                                                                                                                         |           |
| 50                       | 9.01 | Under the predicted future climatic conditions, are the risks of entry into the RA area posed by the taxon likely to increase, decrease or not change?       | Not applicable | not applicable                                                                                                                                                                                                                                                                                                                                                                                                                                          | Very high |
| 51                       | 9.02 | Under the predicted future climatic conditions, are the risks of establishment posed by the taxon likely to increase, decrease or not change?                | Decrease       | The risks of establishment <i>S. alpinus</i> is decreased. Reason for that is increased temperatures because its catch has dramatically declined in several parts of Europe. (Elliott, J., & Elliott, J. A. (2010). Temperature requirements of Atlantic salmon <i>Salmo salar</i> , brown trout <i>Salmo trutta</i> and Arctic charr <i>Salvelinus alpinus</i> : predicting the effects of climate change. Journal of fish biology, 77(8), 1793-1817.) | Low       |
| 52                       | 9.03 | Under the predicted future climatic conditions, are the risks of dispersal within the RA area posed by the taxon likely to increase, decrease or not change? | Decrease       | The risk of spread in the RA area is reduced. Temperatures are a major problem therefore. (Elliott, J., & Elliott, J. A. (2010). Temperature requirements of Atlantic salmon <i>Salmo salar</i> , brown trout <i>Salmo trutta</i> and Arctic charr <i>Salvelinus alpinus</i> : predicting the effects of climate change. Journal of fish biology, 77(8), 1793-1817.)                                                                                    | Low       |
| 53                       | 9.04 | Under the predicted future climatic conditions, what is the likely magnitude of future potential impacts on biodiversity and/or ecological integrity/status? | Lower          | Decrease (Elliott, J., & Elliott, J. A. (2010). Temperature requirements of Atlantic salmon <i>Salmo salar</i> , brown trout <i>Salmo trutta</i> and Arctic charr <i>Salvelinus alpinus</i> : predicting the effects of climate change. Journal of fish biology, 77(8), 1793-1817.)                                                                                                                                                                     | Low       |
| 54                       | 9.05 | Under the predicted future climatic conditions, what is the likely magnitude of future potential impacts on ecosystem structure and/or function?             | No change      | It is likely to no have impact on the ecosystem and system functioning. (Elliott, J., & Elliott, J. A. (2010). Temperature requirements of Atlantic salmon <i>Salmo salar</i> , brown trout <i>Salmo trutta</i> and Arctic charr <i>Salvelinus alpinus</i> : predicting the effects of climate change. Journal of fish biology, 77(8), 1793-1817.)                                                                                                      | Low       |
| 55                       | 9.06 | Under the predicted future climatic conditions, what is the likely magnitude of future potential impacts on ecosystem services/socio-economic factors?       | No change      | Elliott, J., & Elliott, J. A. (2010). Temperature requirements of Atlantic salmon <i>Salmo salar</i> , brown trout <i>Salmo trutta</i> and Arctic charr <i>Salvelinus alpinus</i> : predicting the effects of climate change. Journal of fish biology, 77(8), 1793-1817.                                                                                                                                                                                | Low       |

| Statistics                                     |      |
|------------------------------------------------|------|
| Scores                                         |      |
| BRA                                            | 28.0 |
| BRA Outcome                                    | -    |
| BRA+CCA                                        | 22.0 |
| BRA+CCA Outcome                                | -    |
| Score partition                                |      |
| A. Biogeography/Historical                     | 16.0 |
| 1. Domestication/Cultivation                   | 2.0  |
| 2. Climate, distribution and introduction risk | 0.0  |
| 3. Invasive elsewhere                          | 14.0 |
| B. Biology/Ecology                             | 12.0 |
| 4. Undesirable (or persistence) traits         | 7.0  |
| 5. Resource exploitation                       | 5.0  |
| 6. Reproduction                                | 0.0  |
| 7. Dispersal mechanisms                        | -1.0 |
| 8. Tolerance attributes                        | 1.0  |
| C. Climate change                              | -6.0 |
| 9. Climate change                              | -6.0 |
| Answered Questions                             |      |
| Total                                          | 55   |
| A. Biogeography/Historical                     | 13   |
| 1. Domestication/Cultivation                   | 3    |
| 2. Climate, distribution and introduction risk | 5    |
| 3. Invasive elsewhere                          | 5    |
| B. Biology/Ecology                             | 36   |
| 4. Undesirable (or persistence) traits         | 12   |
| 5. Resource exploitation                       | 2    |
| 6. Reproduction                                | 7    |
| 7. Dispersal mechanisms                        | 9    |
| 8. Tolerance attributes                        | 6    |
| C. Climate change                              | 6    |
| 9. Climate change                              | 6    |
| Sectors affected                               |      |
| Commercial                                     | 13   |
| Environmental                                  | 7    |
| Species or population nuisance traits          | 4    |

| Thresholds |      |
|------------|------|
| BRA        | -    |
| BRA+CCA    | -    |
| Confidence |      |
| BRA+CCA    | 0.65 |
| BRA        | 0.69 |
| CCA        | 0.38 |

| Date and Time       |
|---------------------|
| 02/06/2020 09:09:48 |

AS-ISK v2

| Taxon and Assessor details         |                                         |
|------------------------------------|-----------------------------------------|
| Category                           | Fishes and Lampreys (freshwater)        |
| Taxon name                         | <i>Salvelinus fontinalis</i>            |
| Common name                        | brook trout                             |
| Assessor                           | Ana Marić                               |
| Risk screening context             |                                         |
| Reason and socio-economic benefits |                                         |
| Risk assessment area               | Danube & Adriatic basins BA, HR, ME, RS |
| Taxonomy                           |                                         |
| Native range                       |                                         |
| Introduced range                   |                                         |
| URL                                |                                         |

|                                                |      | Response                                                                                                                                                                | Justification (references and/or other information) | Confidence                                                                                                                                                                                                                                                               |           |
|------------------------------------------------|------|-------------------------------------------------------------------------------------------------------------------------------------------------------------------------|-----------------------------------------------------|--------------------------------------------------------------------------------------------------------------------------------------------------------------------------------------------------------------------------------------------------------------------------|-----------|
| A. Biogeography/Historical                     |      |                                                                                                                                                                         |                                                     |                                                                                                                                                                                                                                                                          |           |
| 1. Domestication/Cultivation                   |      |                                                                                                                                                                         |                                                     |                                                                                                                                                                                                                                                                          |           |
| 1                                              | 1.01 | Has the taxon been the subject of domestication (or cultivation) for at least 20 generations?                                                                           | Yes                                                 | World Distribution of Brook Trout, Salaelinus fontinalis Hucu R. MecCnIMMoN and J. Scorr Campbell 1969                                                                                                                                                                   | Very high |
| 2                                              | 1.02 | Is the taxon harvested in the wild and likely to be sold or used in its live form?                                                                                      | Yes                                                 | https://www.cabi.org/isc/datasheet/65325#tosummaryOfInvasiveness                                                                                                                                                                                                         | Very high |
| 3                                              | 1.03 | Does the taxon have invasive races, varieties, sub-taxa or congeners?                                                                                                   | Yes                                                 | https://www.cabi.org/isc/datasheet/65325#tosummaryOfInvasiveness                                                                                                                                                                                                         | Very high |
| 2. Climate, distribution and introduction risk |      |                                                                                                                                                                         |                                                     |                                                                                                                                                                                                                                                                          |           |
| 4                                              | 2.01 | How similar are the climatic conditions of the Risk Assessment (RA) area and the taxon's native range?                                                                  | Medium                                              | Proffesional estimation                                                                                                                                                                                                                                                  | High      |
| 5                                              | 2.02 | What is the quality of the climate matching data?                                                                                                                       | Medium                                              | https://www.cabi.org/isc/datasheet/65325#tosummaryOfInvasiveness                                                                                                                                                                                                         | High      |
| 6                                              | 2.03 | Is the taxon already present outside of captivity in the RA area?                                                                                                       | Yes                                                 | FRESHWATER ALIEN FISH SPECIES INTRODUCED INTO CROATIA FOR AQUACULTURE AND CONSEQUENCES OF THEIR ESCAPES AND RELEASES IN INLAND WATERS Marina Piria1*, Divna Lukić1, Tatjana Boroša-Pecigoš2. 2016                                                                        | High      |
| 7                                              | 2.04 | How many potential vectors could the taxon use to enter in the RA area?                                                                                                 | One                                                 | Stocking                                                                                                                                                                                                                                                                 | High      |
| 8                                              | 2.05 | Is the taxon currently found in close proximity to, and likely to enter into, the RA area in the near future (e.g. unintentional and intentional introductions)?        | Yes                                                 | FRESHWATER ALIEN FISH SPECIES INTRODUCED INTO CROATIA FOR AQUACULTURE AND CONSEQUENCES OF THEIR ESCAPES AND RELEASES IN INLAND WATERS Marina Piria1*, Divna Lukić1, Tatjana Boroša-Pecigoš. 2016<br>https://www.cabi.org/isc/datasheet/65325#todistributionDatabaseTable | Very high |
| 3. Invasive elsewhere                          |      |                                                                                                                                                                         |                                                     |                                                                                                                                                                                                                                                                          |           |
| 9                                              | 3.01 | Has the taxon become naturalised (established viable populations) outside its                                                                                           | Yes                                                 | https://www.cabi.org/isc/datasheet/65325#todistributionDatabaseTable                                                                                                                                                                                                     | Very high |
| 10                                             | 3.02 | In the taxon's introduced range, are there known adverse impacts to wild stocks or commercial taxa?                                                                     | Yes                                                 | https://www.cabi.org/isc/datasheet/65325#toriskAndImpactFactors                                                                                                                                                                                                          | High      |
| 11                                             | 3.03 | In the taxon's introduced range, are there known adverse impacts to aquaculture?                                                                                        | No                                                  | https://www.cabi.org/isc/datasheet/65325#toriskAndImpactFactors                                                                                                                                                                                                          | High      |
| 12                                             | 3.04 | In the taxon's introduced range, are there known adverse impacts to ecosystem                                                                                           | Yes                                                 | https://www.cabi.org/isc/datasheet/65325#toriskAndImpactFactors                                                                                                                                                                                                          | High      |
| 13                                             | 3.05 | In the taxon's introduced range, are there known adverse socio-economic impacts?                                                                                        | No                                                  | https://www.cabi.org/isc/datasheet/65325#toriskAndImpactFactors                                                                                                                                                                                                          | High      |
| B. Biology/ Ecology                            |      |                                                                                                                                                                         |                                                     |                                                                                                                                                                                                                                                                          |           |
| 4. Undesirable (or persistence) traits         |      |                                                                                                                                                                         |                                                     |                                                                                                                                                                                                                                                                          |           |
| 14                                             | 4.01 | Is it likely that the taxon will be poisonous or pose other risks to human health?                                                                                      | No                                                  | https://www.fishbase.se/summary/Salvelinus-fontinalis.html                                                                                                                                                                                                               | High      |
| 15                                             | 4.02 | Is it likely that the taxon will smother one or more native taxa (that are not threatened or protected)?                                                                | Yes                                                 | https://www.cabi.org/isc/datasheet/65325#toriskAndImpactFactors                                                                                                                                                                                                          | High      |
| 16                                             | 4.03 | Are there any threatened or protected taxa that the non-native taxon would parasitise in the RA area?                                                                   | No                                                  | https://www.fishbase.se/summary/Salvelinus-fontinalis.html                                                                                                                                                                                                               | High      |
| 17                                             | 4.04 | Is the taxon adaptable in terms of climatic and other environmental conditions, thus enhancing its potential persistence if it has invaded or could invade the RA area? | Yes                                                 | https://www.cabi.org/isc/datasheet/65325#toriskAndImpactFactors                                                                                                                                                                                                          | High      |
| 18                                             | 4.05 | Is the taxon likely to disrupt food-web structure/function in aquatic ecosystems if it has invaded or is likely to invade the RA                                        | Yes                                                 | https://www.cabi.org/isc/datasheet/65325#toriskAndImpactFactors                                                                                                                                                                                                          | High      |
| 19                                             | 4.06 | Is the taxon likely to exert adverse impacts on ecosystem services in the RA area?                                                                                      | Yes                                                 | Fechney LR, 1988. The summer diet of brook trout (Salvelinus fontinalis) in a South Island high-country stream. New Zealand Journal of Marine and Freshwater Research, 22(2):163-168                                                                                     | Medium    |
| 20                                             | 4.07 | Is it likely that the taxon will host, and/or act as a vector for, recognised pests and infectious agents that are endemic in the RA                                    | No                                                  | https://www.cabi.org/isc/datasheet/65325#tosummaryOfInvasiveness                                                                                                                                                                                                         | High      |
| 21                                             | 4.08 | Is it likely that the taxon will host, and/or act as a vector for, recognised pests and infectious agents that are absent from (novel to) the RA area?                  | Yes                                                 | https://www.cabi.org/isc/datasheet/65325#tosummaryOfInvasiveness                                                                                                                                                                                                         | High      |
| 22                                             | 4.09 | Is it likely that the taxon will achieve a body size that will make it more likely to be released from captivity?                                                       | Yes                                                 | https://www.fishbase.se/summary/Salvelinus-fontinalis.html                                                                                                                                                                                                               | Very high |
| 23                                             | 4.10 | Is the taxon capable of sustaining itself in a range of water velocity conditions (e.g. versatile in habitat use)?                                                      | Yes                                                 | The Behavior of Juvenile Atlantic Salmon (Salmo salar) and Brook Trout (Salvelinus fontinalis) with Regard to Temperature and to Water Velocity R. John Gibson . 2011                                                                                                    | Medium    |

|                                 |      |                                                                                                                                                                              |     |                                                                                                                                                                                                                                                                 |           |
|---------------------------------|------|------------------------------------------------------------------------------------------------------------------------------------------------------------------------------|-----|-----------------------------------------------------------------------------------------------------------------------------------------------------------------------------------------------------------------------------------------------------------------|-----------|
| 24                              | 4.11 | Is it likely that the taxon's mode of existence (e.g. excretion of by-products) or behaviours (e.g. feeding) will reduce habitat quality for native taxa?                    | Yes | <a href="https://www.cabi.org/isc/datasheet/65325#touses">https://www.cabi.org/isc/datasheet/65325#touses</a>                                                                                                                                                   | High      |
| 25                              | 4.12 | Is the taxon likely to maintain a viable population even when present in low densities (or persisting in adverse conditions by way of a dormant form)?                       | Yes | Hierarchical analysis of relationships between brook trout ( <i>Salvelinus fontinalis</i> ) density and stream habitat features. Rodriguez. 2007                                                                                                                | Medium    |
| <b>5. Resource exploitation</b> |      |                                                                                                                                                                              |     |                                                                                                                                                                                                                                                                 |           |
| 26                              | 5.01 | Is the taxon likely to consume threatened or protected native taxa in the RA area?                                                                                           | Yes | <a href="https://www.cabi.org/isc/datasheet/65325#tobiologyAndEcology">https://www.cabi.org/isc/datasheet/65325#tobiologyAndEcology</a>                                                                                                                         | High      |
| 27                              | 5.02 | Is the taxon likely to sequester food resources (including nutrients) to the detriment of native taxa in the RA area?                                                        | Yes | <a href="https://www.cabi.org/isc/datasheet/65325#toriskAndImpactFactors">https://www.cabi.org/isc/datasheet/65325#toriskAndImpactFactors</a>                                                                                                                   | High      |
| <b>6. Reproduction</b>          |      |                                                                                                                                                                              |     |                                                                                                                                                                                                                                                                 |           |
| 28                              | 6.01 | Is the taxon likely to exhibit parental care and/or to reduce age-at-maturity in response to environmental conditions?                                                       | Yes | Kottelat. 2007                                                                                                                                                                                                                                                  | Very high |
| 29                              | 6.02 | Is the taxon likely to produce viable gametes or propagules (in the RA area)?                                                                                                | Yes | FRESHWATER ALIEN FISH SPECIES INTRODUCED INTO CROATIA FOR AQUACULTURE AND CONSEQUENCES OF THEIR ESCAPES AND RELEASES IN INLAND WATERS Marina Piria1*, Divna Lukić1, Tatjana Boroša-Pecigoš. 2016                                                                | Very high |
| 30                              | 6.03 | Is the taxon likely to hybridise naturally with native taxa?                                                                                                                 | Yes | Cucherousset, Julien and Aymes, J. C. and Poulet, Nicolas and Santoul, Frédéric and Céréghino, Régis. Do native brown trout and non-native brook trout interact reproductively? (2008) <i>Naturwissenschaften</i> , vol. 95 (n° 7). pp. 647-654. ISSN 1432-1904 | Medium    |
| 31                              | 6.04 | Is the taxon likely to be hermaphroditic or to display asexual reproduction?                                                                                                 | No  | Cucherousset, Julien and Aymes, J. C. and Poulet, Nicolas and Santoul, Frédéric and Céréghino, Régis. Do native brown trout and non-native brook trout interact reproductively? (2008) <i>Naturwissenschaften</i> , vol. 95 (n° 7). pp. 647-654. ISSN 1432-1904 | High      |
| 32                              | 6.05 | Is the taxon dependent on the presence of another taxon (or specific habitat features) to complete its life cycle?                                                           | No  | <a href="https://www.cabi.org/isc/datasheet/65325#tobiologyAndEcology">https://www.cabi.org/isc/datasheet/65325#tobiologyAndEcology</a>                                                                                                                         | Very high |
| 33                              | 6.06 | Is the taxon known (or likely) to produce a large number of propagules or offspring within a short time span (e.g. < 1 year)?                                                | Yes | <a href="https://www.cabi.org/isc/datasheet/65325#tobiologyAndEcology">https://www.cabi.org/isc/datasheet/65325#tobiologyAndEcology</a>                                                                                                                         | Very high |
| 34                              | 6.07 | How many time units (days, months, years) does the taxon require to reach the age-at-first-reproduction?                                                                     | 1   | Kottelat. 2007                                                                                                                                                                                                                                                  | High      |
| <b>7. Dispersal mechanisms</b>  |      |                                                                                                                                                                              |     |                                                                                                                                                                                                                                                                 |           |
| 35                              | 7.01 | How many potential internal vectors/pathways could the taxon use to disperse within the RA area (with suitable protected areas (e.g. MCZ, MPA, SSSI)?                        | >1  | <a href="https://www.cabi.org/isc/datasheet/65325#toriskAndImpactFactors">https://www.cabi.org/isc/datasheet/65325#toriskAndImpactFactors</a>                                                                                                                   | Medium    |
| 36                              | 7.02 | Will any of these vectors/pathways bring the taxon in close proximity to one or more protected areas (e.g. MCZ, MPA, SSSI)?                                                  | Yes | FRESHWATER ALIEN FISH SPECIES INTRODUCED INTO CROATIA FOR AQUACULTURE AND CONSEQUENCES OF THEIR ESCAPES AND RELEASES IN INLAND WATERS Marina Piria1*, Divna Lukić1, Tatjana Boroša-Pecigoš2. 2016                                                               | Very high |
| 37                              | 7.03 | Does the taxon have a means of actively attaching itself to hard substrata (e.g. ship hulls, pilings, buoys) such that it enhances the likelihood of dispersal?              | No  | Kottelat. 2007                                                                                                                                                                                                                                                  | Very high |
| 38                              | 7.04 | Is natural dispersal of the taxon likely to occur as eggs (for animals) or as propagules (for plants: seeds, spores) in the RA area?                                         | No  | Kottelat. 2007                                                                                                                                                                                                                                                  | High      |
| 39                              | 7.05 | Is natural dispersal of the taxon likely to occur as larvae/juveniles (for animals) or as fragments/seedlings (for plants) in the RA area?                                   | Yes | Kottelat. 2007                                                                                                                                                                                                                                                  | High      |
| 40                              | 7.06 | Are older life stages of the taxon likely to migrate in the RA area for reproduction?                                                                                        | Yes | Kottelat. 2007                                                                                                                                                                                                                                                  | High      |
| 41                              | 7.07 | Are propagules or eggs of the taxon likely to be dispersed in the RA area by other animals?                                                                                  | No  | Kottelat. 2007                                                                                                                                                                                                                                                  | High      |
| 42                              | 7.08 | Is dispersal of the taxon along any of the vectors/pathways mentioned in the previous seven questions (35-41; i.e. both unintentional or intentional) likely to be           | Yes | <a href="https://www.cabi.org/isc/datasheet/65325#toriskAndImpactFactors">https://www.cabi.org/isc/datasheet/65325#toriskAndImpactFactors</a>                                                                                                                   | High      |
| 43                              | 7.09 | Is dispersal of the taxon density dependent?                                                                                                                                 | Yes | Density-dependent individual growth and size dynamics of central Appalachian brook trout ( <i>Salvelinus fontinalis</i> ) RM Utz, KJ Hartman. 2009                                                                                                              | High      |
| <b>8. Tolerance attributes</b>  |      |                                                                                                                                                                              |     |                                                                                                                                                                                                                                                                 |           |
| 44                              | 8.01 | Is the taxon able to withstand being out of water for extended periods (e.g. minimum of one or more hours) at some stage of its life cycle?                                  | No  | Kottelat. 2007                                                                                                                                                                                                                                                  | Very high |
| 45                              | 8.02 | Is the taxon tolerant of a wide range of water quality conditions relevant to that taxon? [In the Justification field, indicate the relevant water quality variable(s) being | No  | <a href="https://www.cabi.org/isc/datasheet/65325#tewaterTolerances">https://www.cabi.org/isc/datasheet/65325#tewaterTolerances</a>                                                                                                                             | High      |
| 46                              | 8.03 | Can the taxon be controlled or eradicated in the wild with chemical, biological, or other agents/means?                                                                      | No  | <a href="https://www.cabi.org/isc/datasheet/65325#topreventionAndControl">https://www.cabi.org/isc/datasheet/65325#topreventionAndControl</a>                                                                                                                   | High      |
| 47                              | 8.04 | Is the taxon likely to tolerate or benefit from environmental/human disturbance?                                                                                             | No  | <a href="https://www.cabi.org/isc/datasheet/65325#topreventionAndControl">https://www.cabi.org/isc/datasheet/65325#topreventionAndControl</a>                                                                                                                   | High      |
| 48                              | 8.05 | Is the taxon able to tolerate salinity levels that are higher or lower than those found in its usual environment?                                                            | Yes | <a href="https://www.cabi.org/isc/datasheet/65325#tewaterTolerances">https://www.cabi.org/isc/datasheet/65325#tewaterTolerances</a>                                                                                                                             | Very high |
| 49                              | 8.06 | Are there effective natural enemies (predators) of the taxon present in the RA                                                                                               | Yes | <a href="https://www.cabi.org/isc/datasheet/65325#tonaturalEnemies">https://www.cabi.org/isc/datasheet/65325#tonaturalEnemies</a>                                                                                                                               | Very high |
| <b>C. Climate change</b>        |      |                                                                                                                                                                              |     |                                                                                                                                                                                                                                                                 |           |
| <b>9. Climate change</b>        |      |                                                                                                                                                                              |     |                                                                                                                                                                                                                                                                 |           |

|    |      |                                                                                                                                                              |           |                                                                                                                                   |        |
|----|------|--------------------------------------------------------------------------------------------------------------------------------------------------------------|-----------|-----------------------------------------------------------------------------------------------------------------------------------|--------|
| 50 | 9.01 | Under the predicted future climatic conditions, are the risks of entry into the RA area posed by the taxon likely to increase, decrease or not change?       | No change | <a href="https://www.cabi.org/isc/datasheet/65325#tonaturalEnemies">https://www.cabi.org/isc/datasheet/65325#tonaturalEnemies</a> | High   |
| 51 | 9.02 | Under the predicted future climatic conditions, are the risks of establishment posed by the taxon likely to increase, decrease or not change?                | No change | <a href="https://www.cabi.org/isc/datasheet/65325#toclimate">https://www.cabi.org/isc/datasheet/65325#toclimate</a>               | Medium |
| 52 | 9.03 | Under the predicted future climatic conditions, are the risks of dispersal within the RA area posed by the taxon likely to increase, decrease or not change? | No change | <a href="https://www.cabi.org/isc/datasheet/65325#toclimate">https://www.cabi.org/isc/datasheet/65325#toclimate</a>               | Medium |
| 53 | 9.04 | Under the predicted future climatic conditions, what is the likely magnitude of future potential impacts on biodiversity and/or ecological integrity/status? | No change | <a href="https://www.cabi.org/isc/datasheet/65325#toclimate">https://www.cabi.org/isc/datasheet/65325#toclimate</a>               | High   |
| 54 | 9.05 | Under the predicted future climatic conditions, what is the likely magnitude of future potential impacts on ecosystem structure and/or function?             | No change | <a href="https://www.cabi.org/isc/datasheet/65325#toclimate">https://www.cabi.org/isc/datasheet/65325#toclimate</a>               | High   |
| 55 | 9.06 | Under the predicted future climatic conditions, what is the likely magnitude of future potential impacts on ecosystem services/socio-economic factors?       | No change | <a href="https://www.cabi.org/isc/datasheet/65325#toclimate">https://www.cabi.org/isc/datasheet/65325#toclimate</a>               | High   |

| Statistics                                     |             |
|------------------------------------------------|-------------|
| Scores                                         |             |
| <b>BRA</b>                                     | <b>35.5</b> |
| <b>BRA Outcome</b>                             | <b>-</b>    |
| <b>BRA+CCA</b>                                 | <b>35.5</b> |
| <b>BRA+CCA Outcome</b>                         | <b>-</b>    |
| Score partition                                |             |
| <b>A. Biogeography/Historical</b>              | <b>12.5</b> |
| 1. Domestication/Cultivation                   | 4.0         |
| 2. Climate, distribution and introduction risk | 1.0         |
| 3. Invasive elsewhere                          | 7.5         |
| <b>B. Biology/Ecology</b>                      | <b>23.0</b> |
| 4. Undesirable (or persistence) traits         | 9.0         |
| 5. Resource exploitation                       | 7.0         |
| 6. Reproduction                                | 5.0         |
| 7. Dispersal mechanisms                        | 3.0         |
| 8. Tolerance attributes                        | -1.0        |
| <b>C. Climate change</b>                       | <b>0.0</b>  |
| 9. Climate change                              | 0.0         |
| Answered Questions                             |             |
| <b>Total</b>                                   | <b>55</b>   |
| <b>A. Biogeography/Historical</b>              | <b>13</b>   |
| 1. Domestication/Cultivation                   | 3           |
| 2. Climate, distribution and introduction risk | 5           |
| 3. Invasive elsewhere                          | 5           |
| <b>B. Biology/Ecology</b>                      | <b>36</b>   |
| 4. Undesirable (or persistence) traits         | 12          |
| 5. Resource exploitation                       | 2           |
| 6. Reproduction                                | 7           |
| 7. Dispersal mechanisms                        | 9           |
| 8. Tolerance attributes                        | 6           |
| <b>C. Climate change</b>                       | <b>6</b>    |
| 9. Climate change                              | 6           |
| Sectors affected                               |             |
| <b>Commercial</b>                              | <b>9</b>    |
| <b>Environmental</b>                           | <b>12</b>   |
| <b>Species or population nuisance traits</b>   | <b>19</b>   |

| Thresholds     |             |
|----------------|-------------|
| <b>BRA</b>     | <b>-</b>    |
| <b>BRA+CCA</b> | <b>-</b>    |
| Confidence     |             |
| <b>BRA+CCA</b> | <b>0.79</b> |
| <b>BRA</b>     | <b>0.80</b> |
| <b>CCA</b>     | <b>0.67</b> |

| Date and Time       |  |
|---------------------|--|
| 26/05/2021 16:08:00 |  |

## AS-ISK v2

| Taxon and Assessor details         |                                         |
|------------------------------------|-----------------------------------------|
| Category                           | Fishes and Lampreys (freshwater)        |
| Taxon name                         | <i>Salvelinus fontinalis</i>            |
| Common name                        | brook trout                             |
| Assessor                           | Ivan Špelić                             |
| Risk screening context             |                                         |
| Reason and socio-economic benefits |                                         |
| Risk assessment area               | Danube & Adriatic basins BA, HR, ME, RS |
| Taxonomy                           |                                         |
| Native range                       |                                         |
| Introduced range                   |                                         |
| URL                                |                                         |

|                                                |      | Response                                                                                                                                                                | Justification (references and/or other information) | Confidence                                                                                                                                                                                                                                                                                                                                                                                                                                                                              |           |
|------------------------------------------------|------|-------------------------------------------------------------------------------------------------------------------------------------------------------------------------|-----------------------------------------------------|-----------------------------------------------------------------------------------------------------------------------------------------------------------------------------------------------------------------------------------------------------------------------------------------------------------------------------------------------------------------------------------------------------------------------------------------------------------------------------------------|-----------|
| A. Biogeography/Historical                     |      |                                                                                                                                                                         |                                                     |                                                                                                                                                                                                                                                                                                                                                                                                                                                                                         |           |
| 1. Domestication/Cultivation                   |      |                                                                                                                                                                         |                                                     |                                                                                                                                                                                                                                                                                                                                                                                                                                                                                         |           |
| 1                                              | 1.01 | Has the taxon been the subject of domestication (or cultivation) for at least 20 generations?                                                                           | Yes                                                 | Froese & Pauly 2020                                                                                                                                                                                                                                                                                                                                                                                                                                                                     | Very high |
| 2                                              | 1.02 | Is the taxon harvested in the wild and likely to be sold or used in its live form?                                                                                      | No                                                  | Restocking of open waters with farmed fish (Povž et al. 2015)                                                                                                                                                                                                                                                                                                                                                                                                                           | High      |
| 3                                              | 1.03 | Does the taxon have invasive races, varieties, sub-taxa or congeners?                                                                                                   | No                                                  | Kottelat, M. & Freyhof, J. 2007. Handbook of European Freshwater Fishes. Kottelat, Cornol and Freyhof, Berlin, xiv + 646 pp.                                                                                                                                                                                                                                                                                                                                                            | Very high |
| 2. Climate, distribution and introduction risk |      |                                                                                                                                                                         |                                                     |                                                                                                                                                                                                                                                                                                                                                                                                                                                                                         |           |
| 4                                              | 2.01 | How similar are the climatic conditions of the Risk Assessment (RA) area and the taxon's native range?                                                                  | High                                                | Climatch 2020                                                                                                                                                                                                                                                                                                                                                                                                                                                                           | Medium    |
| 5                                              | 2.02 | What is the quality of the climate matching data?                                                                                                                       | Medium                                              | Climatch 2020                                                                                                                                                                                                                                                                                                                                                                                                                                                                           | High      |
| 6                                              | 2.03 | Is the taxon already present outside of captivity in the RA area?                                                                                                       | Yes                                                 | Lenhardt, M., Markovic, G., Hegedis, A., Maletin, S., Cirkovic, M., Markovic, Z., 2011. Non-native and translocated fish species in Serbia and their impact on the native ichthyofauna. Reviews in Fish Biology and Fisheries 21, 407–421.. doi:10.1007/s11160-010-                                                                                                                                                                                                                     | Very high |
| 7                                              | 2.04 | How many potential vectors could the taxon use to enter in the RA area?                                                                                                 | Not applicable                                      | Already present (Lenhardt, M., Markovic, G., Hegedis, A., Maletin, S., Cirkovic, M., Markovic, Z., 2011. Non-native and translocated fish species in Serbia and their impact on the native ichthyofauna. Reviews in Fish Biology and Fisheries 21, 407–421.. doi:10.1007/s11160-010-9180-8).                                                                                                                                                                                            | Very high |
| 8                                              | 2.05 | Is the taxon currently found in close proximity to, and likely to enter into, the RA area in the near future (e.g. unintentional and intentional introductions)?        | Not applicable                                      | Already present (Lenhardt, M., Markovic, G., Hegedis, A., Maletin, S., Cirkovic, M., Markovic, Z., 2011. Non-native and translocated fish species in Serbia and their impact on the native ichthyofauna. Reviews in Fish Biology and Fisheries 21, 407–421.. doi:10.1007/s11160-010-9180-8).                                                                                                                                                                                            | Very high |
| 3. Invasive elsewhere                          |      |                                                                                                                                                                         |                                                     |                                                                                                                                                                                                                                                                                                                                                                                                                                                                                         |           |
| 9                                              | 3.01 | Has the taxon become naturalised (established viable populations) outside its                                                                                           | Yes                                                 | Kottelat, M. & Freyhof, J. 2007. Handbook of European Freshwater Fishes. Kottelat, Cornol and Freyhof, Berlin, xiv + 646 pp                                                                                                                                                                                                                                                                                                                                                             | Very high |
| 10                                             | 3.02 | In the taxon's introduced range, are there known adverse impacts to wild stocks or commercial taxa?                                                                     | Yes                                                 | Global Invasive Species Database (2020) Species profile: <i>Salvelinus fontinalis</i> . Downloaded from <a href="http://www.iucnqisd.org/qisd/species.php?sc=1226">http://www.iucnqisd.org/qisd/species.php?sc=1226</a> on 04-03-                                                                                                                                                                                                                                                       | Very high |
| 11                                             | 3.03 | In the taxon's introduced range, are there known adverse impacts to aquaculture?                                                                                        | No                                                  | Global Invasive Species Database (2020) Species profile: <i>Salvelinus fontinalis</i> . Downloaded from <a href="http://www.iucnqisd.org/qisd/species.php?sc=1226">http://www.iucnqisd.org/qisd/species.php?sc=1226</a> on 04-03-                                                                                                                                                                                                                                                       | High      |
| 12                                             | 3.04 | In the taxon's introduced range, are there known adverse impacts to ecosystem services?                                                                                 | Yes                                                 | <i>S. fontinalis</i> is said to modify nutrient cycling in lakes through its grazing of zooplankton, which in cases of drinking-water reservoirs could have adverse implications for environmental                                                                                                                                                                                                                                                                                      | High      |
| 13                                             | 3.05 | In the taxon's introduced range, are there known adverse socio-economic impacts?                                                                                        | No                                                  | Brook trout are extremely popular in aquaculture and angling. Most of their introductions have been because of this. They are an important food source and socio-economic resource. Also, they are commonly used as experimentation test individuals (Global Invasive Species Database (2020) Species profile: <i>Salvelinus fontinalis</i> . Downloaded from <a href="http://www.iucnqisd.org/qisd/species.php?sc=1226">http://www.iucnqisd.org/qisd/species.php?sc=1226</a> on 04-03- | High      |
| B. Biology/Ecology                             |      |                                                                                                                                                                         |                                                     |                                                                                                                                                                                                                                                                                                                                                                                                                                                                                         |           |
| 4. Undesirable (or persistence) traits         |      |                                                                                                                                                                         |                                                     |                                                                                                                                                                                                                                                                                                                                                                                                                                                                                         |           |
| 14                                             | 4.01 | Is it likely that the taxon will be poisonous or pose other risks to human health?                                                                                      | No                                                  | Kottelat, M. & Freyhof, J. 2007. Handbook of European Freshwater Fishes. Kottelat, Cornol and Freyhof, Berlin, xiv + 646 pp                                                                                                                                                                                                                                                                                                                                                             | Very high |
| 15                                             | 4.02 | Is it likely that the taxon will smother one or more native taxa (that are not threatened or protected)?                                                                | Yes                                                 | Brook trout have been found to compete with, displace, or replace many fish species throughout the world (Global Invasive Species Database (2020) Species profile: <i>Salvelinus fontinalis</i> . Downloaded from <a href="http://www.iucnqisd.org/qisd/species.php?sc=1226">http://www.iucnqisd.org/qisd/species.php?sc=1226</a> on 04-03-                                                                                                                                             | High      |
| 16                                             | 4.03 | Are there any threatened or protected taxa that the non-native taxon would parasitise in the RA area?                                                                   | No                                                  | Kottelat, M. and J. Freyhof 2007 Handbook of European freshwater fishes. Publications Kottelat, Cornol, Switzerland.                                                                                                                                                                                                                                                                                                                                                                    | Very high |
| 17                                             | 4.04 | Is the taxon adaptable in terms of climatic and other environmental conditions, thus enhancing its potential persistence if it has invaded or could invade the RA area? | No                                                  | Occurs in clear, cool, well-oxygenated creeks, small to medium rivers, and lakes (Froese & Pauly 2020).                                                                                                                                                                                                                                                                                                                                                                                 | Very high |
| 18                                             | 4.05 | Is the taxon likely to disrupt food-web structure/function in aquatic ecosystems if it has invaded or is likely to invade the RA area?                                  | Yes                                                 | Impacts include top down cascading trophic interactions resulting in modifications of benthic zooplankton, macroinvertebrates, and algal communities. Global Invasive Species Database (2020) Species profile: <i>Salvelinus fontinalis</i> . Downloaded from <a href="http://www.iucnqisd.org/qisd/species.php?sc=1226">http://www.iucnqisd.org/qisd/species.php?sc=1226</a> on 04-03-                                                                                                 | High      |



|                                 |      |                                                                                                                                                                    |                |                                                                                                                                                                                                                                                                                                                                                                                                                                                                            |           |
|---------------------------------|------|--------------------------------------------------------------------------------------------------------------------------------------------------------------------|----------------|----------------------------------------------------------------------------------------------------------------------------------------------------------------------------------------------------------------------------------------------------------------------------------------------------------------------------------------------------------------------------------------------------------------------------------------------------------------------------|-----------|
| 19                              | 4.06 | Is the taxon likely to exert adverse impacts on ecosystem services in the RA area?                                                                                 | Yes            | Impacts include predation and population reduction of amphibians to the point of endangerment; and top down cascading trophic interactions resulting in modifications of benthic zooplankton, macroinvertebrates, and algal communities. Global Invasive Species Database (2020) Species profile: <i>Salvelinus fontinalis</i> . Downloaded from <a href="http://www.iucnqisd.org/qisd/species.php?sc=1226">http://www.iucnqisd.org/qisd/species.php?sc=1226</a> on 04-03- | High      |
| 20                              | 4.07 | Is it likely that the taxon will host, and/or act as a vector for, recognised pests and infectious agents that are endemic in the RA                               | Yes            | CABI 2010                                                                                                                                                                                                                                                                                                                                                                                                                                                                  | High      |
| 21                              | 4.08 | Is it likely that the taxon will host, and/or act as a vector for, recognised pests and infectious agents that are absent from (novel to) the RA area?             | Yes            | CABI 2010                                                                                                                                                                                                                                                                                                                                                                                                                                                                  | High      |
| 22                              | 4.09 | Is it likely that the taxon will achieve a body size that will make it more likely to be released from captivity?                                                  | Yes            | Kottelat, M. and J. Freyhof 2007 Handbook of European freshwater fishes. Publications Kottelat, Cornol, Switzerland.                                                                                                                                                                                                                                                                                                                                                       | Very high |
| 23                              | 4.10 | Is the taxon capable of sustaining itself in a range of water velocity conditions (e.g. versatile in habitat use)?                                                 | Yes            | Inhabits streams and lakes. Kottelat, M. and J. Freyhof 2007 Handbook of European freshwater fishes. Publications Kottelat, Cornol, Switzerland.                                                                                                                                                                                                                                                                                                                           | Very high |
| 24                              | 4.11 | Is it likely that the taxon's mode of existence (e.g. excretion of by-products) or behaviours (e.g. feeding) will reduce habitat quality for native taxa?          | No             | Kottelat, M. and J. Freyhof 2007 Handbook of European freshwater fishes. Publications Kottelat, Cornol, Switzerland. CABI 2010.                                                                                                                                                                                                                                                                                                                                            | High      |
| 25                              | 4.12 | Is the taxon likely to maintain a viable population even when present in low densities (or persisting in adverse conditions by way of a dormant form)?             | No             | No information                                                                                                                                                                                                                                                                                                                                                                                                                                                             | Low       |
| <b>5. Resource exploitation</b> |      |                                                                                                                                                                    |                |                                                                                                                                                                                                                                                                                                                                                                                                                                                                            |           |
| 26                              | 5.01 | Is the taxon likely to consume threatened or protected native taxa in the RA area?                                                                                 | Yes            | Predates on amphibians an fish. Global Invasive Species Database (2020) Species profile: <i>Salvelinus fontinalis</i> . Downloaded from <a href="http://www.iucnqisd.org/qisd/species.php?sc=1226">http://www.iucnqisd.org/qisd/species.php?sc=1226</a> on 04-03-                                                                                                                                                                                                          | High      |
| 27                              | 5.02 | Is the taxon likely to sequester food resources (including nutrients) to the detriment of native taxa in the RA area?                                              | Not applicable | No sufficient data for calculations.                                                                                                                                                                                                                                                                                                                                                                                                                                       | Very high |
| <b>6. Reproduction</b>          |      |                                                                                                                                                                    |                |                                                                                                                                                                                                                                                                                                                                                                                                                                                                            |           |
| 28                              | 6.01 | Is the taxon likely to exhibit parental care and/or to reduce age-at-maturity in response to environmental conditions?                                             | No             | Kottelat, M. and J. Freyhof 2007 Handbook of European freshwater fishes. Publications Kottelat, Cornol, Switzerland.                                                                                                                                                                                                                                                                                                                                                       | Very high |
| 29                              | 6.02 | Is the taxon likely to produce viable gametes or propagules (in the RA area)?                                                                                      | Yes            | Lenhardt, M., Markovic, G., Hegedis, A., Maletin, S., Cirkovic, M., Markovic, Z., 2011. Non-native and translocated fish species in Serbia and their impact on the native ichthyofauna. Reviews in Fish Biology and Fisheries 21, 407–421.. doi:10.1007/s11160-010-                                                                                                                                                                                                        | Very high |
| 30                              | 6.03 | Is the taxon likely to hybridise naturally with native taxa?                                                                                                       | Yes            | Kottelat, M. and J. Freyhof 2007 Handbook of European freshwater fishes. Publications Kottelat, Cornol, Switzerland. (with S. trutta)                                                                                                                                                                                                                                                                                                                                      | Very high |
| 31                              | 6.04 | Is the taxon likely to be hermaphroditic or to display asexual reproduction?                                                                                       | No             | Kottelat, M. and J. Freyhof 2007 Handbook of European freshwater fishes. Publications Kottelat, Cornol, Switzerland.                                                                                                                                                                                                                                                                                                                                                       | Very high |
| 32                              | 6.05 | Is the taxon dependent on the presence of another taxon (or specific habitat features) to complete its life cycle?                                                 | No             | Kottelat, M. and J. Freyhof 2007 Handbook of European freshwater fishes. Publications Kottelat, Cornol, Switzerland.                                                                                                                                                                                                                                                                                                                                                       | Very high |
| 33                              | 6.06 | Is the taxon known (or likely) to produce a large number of propagules or offspring within a short time span (e.g. < 1 year)?                                      | Yes            | Up to 5000 eggs per female (Froese & Pauly 2020).                                                                                                                                                                                                                                                                                                                                                                                                                          | Very high |
| 34                              | 6.07 | How many time units (days, months, years) does the taxon require to reach the age-at-first-reproduction?                                                           | 2              | Kottelat, M. and J. Freyhof 2007 Handbook of European freshwater fishes. Publications Kottelat, Cornol, Switzerland.                                                                                                                                                                                                                                                                                                                                                       | Very high |
| <b>7. Dispersal mechanisms</b>  |      |                                                                                                                                                                    |                |                                                                                                                                                                                                                                                                                                                                                                                                                                                                            |           |
| 35                              | 7.01 | How many potential internal vectors/pathways could the taxon use to disperse within the RA area (with suitable)                                                    | >1             | Restocking, escape from aquaculture (CABI 2010)                                                                                                                                                                                                                                                                                                                                                                                                                            | Medium    |
| 36                              | 7.02 | Will any of these vectors/pathways bring the taxon in close proximity to one or more protected areas (e.g. MCZ, MPA, SSSI)?                                        | Yes            | Personal opinion                                                                                                                                                                                                                                                                                                                                                                                                                                                           | Low       |
| 37                              | 7.03 | Does the taxon have a means of actively attaching itself to hard substrata (e.g. ship hulls, pilings, buoys) such that it enhances the likelihood of dispersal?    | No             | No adaptations                                                                                                                                                                                                                                                                                                                                                                                                                                                             | Very high |
| 38                              | 7.04 | Is natural dispersal of the taxon likely to occur as eggs (for animals) or as propagules (for plants: seeds, spores) in the RA area?                               | No             | Kottelat, M. and J. Freyhof 2007 Handbook of European freshwater fishes. Publications Kottelat, Cornol, Switzerland.                                                                                                                                                                                                                                                                                                                                                       | Very high |
| 39                              | 7.05 | Is natural dispersal of the taxon likely to occur as larvae/juveniles (for animals) or as fragments/seedlings (for plants) in the RA area?                         | Yes            | Drift (personal opinion)                                                                                                                                                                                                                                                                                                                                                                                                                                                   | Low       |
| 40                              | 7.06 | Are older life stages of the taxon likely to migrate in the RA area for reproduction?                                                                              | Yes            | Kottelat, M. and J. Freyhof 2007 Handbook of European freshwater fishes. Publications Kottelat, Cornol, Switzerland.                                                                                                                                                                                                                                                                                                                                                       | High      |
| 41                              | 7.07 | Are propagules or eggs of the taxon likely to be dispersed in the RA area by other animals?                                                                        | No             | Personal opinion                                                                                                                                                                                                                                                                                                                                                                                                                                                           | Low       |
| 42                              | 7.08 | Is dispersal of the taxon along any of the vectors/pathways mentioned in the previous seven questions (35–41; i.e. both unintentional or intentional) likely to be | Yes            | Restocking, escape from aquaculture                                                                                                                                                                                                                                                                                                                                                                                                                                        | High      |
| 43                              | 7.09 | Is dispersal of the taxon density dependent?                                                                                                                       | No             | Personal opinion                                                                                                                                                                                                                                                                                                                                                                                                                                                           | Low       |
| <b>8. Tolerance attributes</b>  |      |                                                                                                                                                                    |                |                                                                                                                                                                                                                                                                                                                                                                                                                                                                            |           |
| 44                              | 8.01 | Is the taxon able to withstand being out of water for extended periods (e.g. minimum of one or more hours) at some stage of its life cycle?                        | No             | Sensitive as other salmonids                                                                                                                                                                                                                                                                                                                                                                                                                                               | Very high |

|                          |      |                                                                                                                                                                              |                |                                                                                                                                                                                                                                                                                                                                                                                                                                                                                                      |           |
|--------------------------|------|------------------------------------------------------------------------------------------------------------------------------------------------------------------------------|----------------|------------------------------------------------------------------------------------------------------------------------------------------------------------------------------------------------------------------------------------------------------------------------------------------------------------------------------------------------------------------------------------------------------------------------------------------------------------------------------------------------------|-----------|
| 45                       | 8.02 | Is the taxon tolerant of a wide range of water quality conditions relevant to that taxon? [In the Justification field, indicate the relevant water quality variable(s) being | No             | Occurs in clear, cool, well-oxygenated habitats (Froese & Pauly 2020).                                                                                                                                                                                                                                                                                                                                                                                                                               | Very high |
| 46                       | 8.03 | Can the taxon be controlled or eradicated in the wild with chemical, biological, or other agents/means?                                                                      | No             | Not allowed.                                                                                                                                                                                                                                                                                                                                                                                                                                                                                         | Very high |
| 47                       | 8.04 | Is the taxon likely to tolerate or benefit from environmental/human disturbance?                                                                                             | No             | Occurs in clear, cool, well-oxygenated habitats                                                                                                                                                                                                                                                                                                                                                                                                                                                      | High      |
| 48                       | 8.05 | Is the taxon able to tolerate salinity levels that are higher or lower than those found in its usual environment?                                                            | Yes            | Kottelat, M. and J. Freyhof 2007 Handbook of European freshwater fishes. Publications Kottelat, Cornol, Switzerland.                                                                                                                                                                                                                                                                                                                                                                                 | High      |
| 49                       | 8.06 | Are there effective natural enemies (predators) of the taxon present in the RA area?                                                                                         | Yes            | Natural enemies of <i>S. fontinalis</i> include larger fish, piscivorous birds (including mergansers and kingfishers), and mammals such as otters and bears. CABI 2010.                                                                                                                                                                                                                                                                                                                              | Very high |
| <b>C. Climate change</b> |      |                                                                                                                                                                              |                |                                                                                                                                                                                                                                                                                                                                                                                                                                                                                                      |           |
| <b>9. Climate change</b> |      |                                                                                                                                                                              |                |                                                                                                                                                                                                                                                                                                                                                                                                                                                                                                      |           |
| 50                       | 9.01 | Under the predicted future climatic conditions, are the risks of entry into the RA area posed by the taxon likely to increase, decrease or not change?                       | Not applicable | Already present (Lenhardt, M., Markovic, G., Hegedis, A., Maletin, S., Cirkovic, M., Markovic, Z., 2011. Non-native and translocated fish species in Serbia and their impact on the native ichthyofauna. Reviews in Fish Biology and Fisheries 21, 407–421.. doi:10.1007/s11160-010-9180-8).                                                                                                                                                                                                         | Very high |
| 51                       | 9.02 | Under the predicted future climatic conditions, are the risks of establishment posed by the taxon likely to increase, decrease or not change?                                | Decrease       | The subject of thermal tolerance among coldwater fishes has been widely documented and is often cited as the single most important abiotic factor limiting the distribution, growth and survival of species like brook trout (Argent et al. 2013). Cold-water habitats and associated obligate species are particularly vulnerable to potential impacts of climate change (Merriam et al. 2017). Authors agree that climate change will not affect native populations as negative as thought before. | High      |
| 52                       | 9.03 | Under the predicted future climatic conditions, are the risks of dispersal within the RA area posed by the taxon likely to increase, decrease or not change?                 | Decrease       | The subject of thermal tolerance among coldwater fishes has been widely documented and is often cited as the single most important abiotic factor limiting the distribution, growth and survival of species like brook trout (Argent et al. 2013). Cold-water habitats and associated obligate species are particularly vulnerable to potential impacts of climate change (Merriam et al. 2017). Authors agree that climate change will not affect native populations as negative as thought before. | High      |
| 53                       | 9.04 | Under the predicted future climatic conditions, what is the likely magnitude of future potential impacts on biodiversity and/or ecological integrity/status?                 | No change      | All populations of cold water species will probably decline (Lower impact i unfavourable conditions for cold-water species (COMTE, L., BUISSON, L., DAUFRESNE, M. and GRENOUILLET, G. (2013), Climate-induced changes in the distribution of freshwater fish: observed and predicted trends. Freshwater Biology, 58: 625-639. https://doi.org/10.1111/fwb.12081).) so relative impact would presumably be the same on those species.                                                                 | Low       |
| 54                       | 9.05 | Under the predicted future climatic conditions, what is the likely magnitude of future potential impacts on ecosystem structure and/or function?                             | Lower          | Less impact on zooplankton communities under predicted less favourable conditions for coldwater species (Lower impact i unfavourable conditions for cold-water species (COMTE, L., BUISSON, L., DAUFRESNE, M. and GRENOUILLET, G. (2013), Climate-induced changes in the distribution of freshwater fish: observed and predicted trends. Freshwater Biology, 58: 625-639. https://doi.org/10.1111/fwb.12081).)                                                                                       | Low       |
| 55                       | 9.06 | Under the predicted future climatic conditions, what is the likely magnitude of future potential impacts on ecosystem services/socio-economic factors?                       | Lower          | Less impact on zooplankton communities under predicted less favourable conditions for coldwater species (Lower impact i unfavourable conditions for cold-water species (COMTE, L., BUISSON, L., DAUFRESNE, M. and GRENOUILLET, G. (2013), Climate-induced changes in the distribution of freshwater fish: observed and predicted trends. Freshwater Biology, 58: 625-639. https://doi.org/10.1111/fwb.12081).)                                                                                       | Low       |

| Statistics                                     |      |
|------------------------------------------------|------|
| Scores                                         |      |
| BRA                                            | 26.0 |
| BRA Outcome                                    | -    |
| BRA+CCA                                        | 18.0 |
| BRA+CCA Outcome                                | -    |
| Score partition                                |      |
| A. Biogeography/Historical                     | 11.0 |
| 1. Domestication/Cultivation                   | 0.0  |
| 2. Climate, distribution and introduction risk | 1.0  |
| 3. Invasive elsewhere                          | 10.0 |
| B. Biology/Ecology                             | 15.0 |
| 4. Undesirable (or persistence) traits         | 6.0  |
| 5. Resource exploitation                       | 5.0  |
| 6. Reproduction                                | 3.0  |
| 7. Dispersal mechanisms                        | 2.0  |
| 8. Tolerance attributes                        | -1.0 |
| C. Climate change                              | -8.0 |
| 9. Climate change                              | -8.0 |
| Answered Questions                             |      |
| Total                                          | 55   |
| A. Biogeography/Historical                     | 13   |
| 1. Domestication/Cultivation                   | 3    |
| 2. Climate, distribution and introduction risk | 5    |
| 3. Invasive elsewhere                          | 5    |
| B. Biology/Ecology                             | 36   |
| 4. Undesirable (or persistence) traits         | 12   |
| 5. Resource exploitation                       | 2    |
| 6. Reproduction                                | 7    |
| 7. Dispersal mechanisms                        | 9    |
| 8. Tolerance attributes                        | 6    |

|                                              |           |
|----------------------------------------------|-----------|
| <b>C. Climate change</b>                     | <b>6</b>  |
| <i>9. Climate change</i>                     | <i>6</i>  |
| <b>Sectors affected</b>                      |           |
| <b>Commercial</b>                            | <b>6</b>  |
| <b>Environmental</b>                         | <b>10</b> |
| <b>Species or population nuisance traits</b> | <b>6</b>  |

|                   |             |
|-------------------|-------------|
| <b>Thresholds</b> |             |
| <b>BRA</b>        | <b>-</b>    |
| <b>BRA+CCA</b>    | <b>-</b>    |
| <b>Confidence</b> |             |
| <b>BRA+CCA</b>    | <b>0.79</b> |
| <b>BRA</b>        | <b>0.82</b> |
| <b>CCA</b>        | <b>0.54</b> |

|                            |  |
|----------------------------|--|
| <b>Date and Time</b>       |  |
| <b>19/05/2021 11:37:31</b> |  |

## AS-ISK v2

| Taxon and Assessor details         |                                         |
|------------------------------------|-----------------------------------------|
| Category                           | Fishes and Lampreys (freshwater)        |
| Taxon name                         | <i>Salvelinus fontinalis</i>            |
| Common name                        | brook trout                             |
| Assessor                           | Tamara Kanjuh                           |
| Risk screening context             |                                         |
| Reason and socio-economic benefits |                                         |
| Risk assessment area               | Danube & Adriatic basins BA, HR, ME, RS |
| Taxonomy                           |                                         |
| Native range                       |                                         |
| Introduced range                   |                                         |
| URL                                |                                         |

|                                                |      |                                                                                                                                                                         | Response | Justification (references and/or other information)                                                                                                                                                                                                                                                                                                                                                                                                                                                                               | Confidence |
|------------------------------------------------|------|-------------------------------------------------------------------------------------------------------------------------------------------------------------------------|----------|-----------------------------------------------------------------------------------------------------------------------------------------------------------------------------------------------------------------------------------------------------------------------------------------------------------------------------------------------------------------------------------------------------------------------------------------------------------------------------------------------------------------------------------|------------|
| A. Biogeography / Historical                   |      |                                                                                                                                                                         |          |                                                                                                                                                                                                                                                                                                                                                                                                                                                                                                                                   |            |
| 1. Domestication/Cultivation                   |      |                                                                                                                                                                         |          |                                                                                                                                                                                                                                                                                                                                                                                                                                                                                                                                   |            |
| 1                                              | 1.01 | Has the taxon been the subject of domestication (or cultivation) for at least 20 generations?                                                                           | Yes      | Culture and transport of brook trout began in the 1850s and was initially done to enhance populations in its native range (Karas, 1997).                                                                                                                                                                                                                                                                                                                                                                                          | Very high  |
| 2                                              | 1.02 | Is the taxon harvested in the wild and likely to be sold or used in its live form?                                                                                      | Yes      | Brook trout are also raised commercially and sold to angling organisations or groups to stock their own lakes or ponds. There are businesses that hold a "U-fish license", where the public can come fish at their lake or pond and buy the fish that they catch ( <a href="https://en.wikipedia.org/wiki/Brook_trout#cite_note-34">https://en.wikipedia.org/wiki/Brook_trout#cite_note-34</a> )                                                                                                                                  | High       |
| 3                                              | 1.03 | Does the taxon have invasive races, varieties, sub-taxa or congeners?                                                                                                   | Yes      | <i>Salvelinus fontinalis</i> is an invasive species that threatens native amphibians and fish, as well as the ecology of lakes and streams (Dunham et al., 2002)                                                                                                                                                                                                                                                                                                                                                                  | Very high  |
| 2. Climate, distribution and introduction risk |      |                                                                                                                                                                         |          |                                                                                                                                                                                                                                                                                                                                                                                                                                                                                                                                   |            |
| 4                                              | 2.01 | How similar are the climatic conditions of the Risk Assessment (RA) area and the taxon's native range?                                                                  | Low      | Dfa, Dfb (Köppen–Geiger climate classification system)                                                                                                                                                                                                                                                                                                                                                                                                                                                                            | Medium     |
| 5                                              | 2.02 | What is the quality of the climate matching data?                                                                                                                       | High     | Köppen–Geiger climate classification system                                                                                                                                                                                                                                                                                                                                                                                                                                                                                       | High       |
| 6                                              | 2.03 | Is the taxon already present outside of captivity in the RA area?                                                                                                       | Yes      | Brook trout regularly escape from fish farm into streams (Simonović et al., 2015).                                                                                                                                                                                                                                                                                                                                                                                                                                                | Very high  |
| 7                                              | 2.04 | How many potential vectors could the taxon use to enter in the RA area?                                                                                                 | >1       | Aquaculture (Piria et al., 2017), sport fishing (Lenhardt et al., 2011)                                                                                                                                                                                                                                                                                                                                                                                                                                                           | Medium     |
| 8                                              | 2.05 | Is the taxon currently found in close proximity to, and likely to enter into, the RA area in the near future (e.g. unintentional and intentional introductions)?        | Yes      | The taxon is successfully reared in the Vrla fishpond - Surdulica (Simonovic2001).                                                                                                                                                                                                                                                                                                                                                                                                                                                | Very high  |
| 3. Invasive elsewhere                          |      |                                                                                                                                                                         |          |                                                                                                                                                                                                                                                                                                                                                                                                                                                                                                                                   |            |
| 9                                              | 3.01 | Has the taxon become naturalised (established viable populations) outside its                                                                                           | No       | Alien salmonids do not reproduce naturally in most of the Balkan waters (Piria et al., 2017)                                                                                                                                                                                                                                                                                                                                                                                                                                      | Low        |
| 10                                             | 3.02 | In the taxon's introduced range, are there known adverse impacts to wild stocks or commercial taxa?                                                                     | Yes      | Brook trout exert similar competitive pressures that result in reductions and displacements of fishes around the globe, such as; golden trout ( <i>Oncorhynchus aguabonita</i> ), brown trout ( <i>Salmo trutta</i> ), and dolly vardon ( <i>Salvelinus malma</i> ), the last two have also been known to hybridize (ISSG). Brook trout have also been theorized to have prevented the establishment of populations of stocked grayling ( <i>Thymallus thymallus</i> ) due to their aggressive nature (Fuller and Neilson, 2014). | Very high  |
| 11                                             | 3.03 | In the taxon's introduced range, are there known adverse impacts to aquaculture?                                                                                        | No       | No information found.                                                                                                                                                                                                                                                                                                                                                                                                                                                                                                             | Low        |
| 12                                             | 3.04 | In the taxon's introduced range, are there known adverse impacts to ecosystem                                                                                           | No       | No information found.                                                                                                                                                                                                                                                                                                                                                                                                                                                                                                             | Low        |
| 13                                             | 3.05 | In the taxon's introduced range, are there known adverse socio-economic impacts?                                                                                        | Yes      | Negative economic effects may be incurred through the brook trout's detrimental effects on native fish populations. If the non-native brook trout is causing a decline in a more valuable native species the economic benefits they bring may be offset by the economic losses suffered from the loss of the more valuable                                                                                                                                                                                                        | Very high  |
| B. Biology / Ecology                           |      |                                                                                                                                                                         |          |                                                                                                                                                                                                                                                                                                                                                                                                                                                                                                                                   |            |
| 4. Undesirable (or persistence) traits         |      |                                                                                                                                                                         |          |                                                                                                                                                                                                                                                                                                                                                                                                                                                                                                                                   |            |
| 14                                             | 4.01 | Is it likely that the taxon will be poisonous or pose other risks to human health?                                                                                      | No       | No information found.                                                                                                                                                                                                                                                                                                                                                                                                                                                                                                             | Low        |
| 15                                             | 4.02 | Is it likely that the taxon will smother one or more native taxa (that are not threatened or protected)?                                                                | Yes      | Introductions may lead to replacement of native salmonids (e.g. brown trout, <i>Salmo trutta</i> ) (cabi.org)                                                                                                                                                                                                                                                                                                                                                                                                                     | High       |
| 16                                             | 4.03 | Are there any threatened or protected taxa that the non-native taxon would parasitise in the RA area?                                                                   | No       | No information found.                                                                                                                                                                                                                                                                                                                                                                                                                                                                                                             | Low        |
| 17                                             | 4.04 | Is the taxon adaptable in terms of climatic and other environmental conditions, thus enhancing its potential persistence if it has invaded or could invade the RA area? | Yes      | Compared to other members of the salmonidae family brook trout are the least specialized in their habitat demands and as such can tolerate a wide variety of environmental conditions. Brook trout are equally at home in small streams, larger rivers, beaver ponds, large lakes, estuaries, and coastal marine environments (Karas, 1997).                                                                                                                                                                                      | High       |
| 18                                             | 4.05 | Is the taxon likely to disrupt food-web structure/function in aquatic ecosystems if it has invaded or is likely to invade the RA area?                                  | Yes      | Recent evidence from France provides information on both dietary overlap (Cucherousset et al., 2007) and reproductive interference (Cucherousset et al., 2008) of introduced <i>S. fontinalis</i> with native <i>Salmo trutta</i> . This indicates that the diet of the two species overlaps to an extent greater than expected, based on stable isotope signatures (Cucherousset et al., 2007).                                                                                                                                  | High       |
| 19                                             | 4.06 | Is the taxon likely to exert adverse impacts on ecosystem services in the RA area?                                                                                      | No       | No information found.                                                                                                                                                                                                                                                                                                                                                                                                                                                                                                             | Low        |
| 20                                             | 4.07 | Is it likely that the taxon will host, and/or act as a vector for, recognised pests and infectious agents that are endemic in the RA                                    | No       | No information found.                                                                                                                                                                                                                                                                                                                                                                                                                                                                                                             | Low        |

|                                 |      |                                                                                                                                                                                           |     |                                                                                                                                                                                                                                                                                                                                                                                                            |           |
|---------------------------------|------|-------------------------------------------------------------------------------------------------------------------------------------------------------------------------------------------|-----|------------------------------------------------------------------------------------------------------------------------------------------------------------------------------------------------------------------------------------------------------------------------------------------------------------------------------------------------------------------------------------------------------------|-----------|
| 21                              | 4.08 | Is it likely that the taxon will host, and/or act as a vector for, recognised pests and infectious agents that are absent from (novel to) the RA area?                                    | No  | No information found.                                                                                                                                                                                                                                                                                                                                                                                      | Low       |
| 22                              | 4.09 | Is it likely that the taxon will achieve a body size that will make it more likely to be released from captivity?                                                                         | No  | No information found.                                                                                                                                                                                                                                                                                                                                                                                      | Low       |
| 23                              | 4.10 | Is the taxon capable of sustaining itself in a range of water velocity conditions (e.g. versatile in habitat use)?                                                                        | Yes | When living in rivers and streams, brook trout like to stay in areas of moderate flow, such as just above or below a set of rapids (Karas, 1997).                                                                                                                                                                                                                                                          | Medium    |
| 24                              | 4.11 | Is it likely that the taxon's mode of existence (e.g. excretion of by-products) or behaviours (e.g. feeding) will reduce habitat quality for native taxa?                                 | No  | No information found.                                                                                                                                                                                                                                                                                                                                                                                      | Low       |
| 25                              | 4.12 | Is the taxon likely to maintain a viable population even when present in low densities (or persisting in adverse conditions by way of a dormant form)?                                    | No  | No information found.                                                                                                                                                                                                                                                                                                                                                                                      | Low       |
| <b>5. Resource exploitation</b> |      |                                                                                                                                                                                           |     |                                                                                                                                                                                                                                                                                                                                                                                                            |           |
| 26                              | 5.01 | Is the taxon likely to consume threatened or protected native taxa in the RA area?                                                                                                        | No  | No information found.                                                                                                                                                                                                                                                                                                                                                                                      | Low       |
| 27                              | 5.02 | Is the taxon likely to sequester food resources (including nutrients) to the detriment of native taxa in the RA area?                                                                     | No  | No information found.                                                                                                                                                                                                                                                                                                                                                                                      | Low       |
| <b>6. Reproduction</b>          |      |                                                                                                                                                                                           |     |                                                                                                                                                                                                                                                                                                                                                                                                            |           |
| 28                              | 6.01 | Is the taxon likely to exhibit parental care and/or to reduce age-at-maturity in response to environmental conditions?                                                                    | No  | No information found.                                                                                                                                                                                                                                                                                                                                                                                      | Low       |
| 29                              | 6.02 | Is the taxon likely to produce viable gametes or propagules (in the RA area)?                                                                                                             | Yes | The alien salmonids do not reproduce naturally in most of the Balkan waters (Piria et al., 2017).                                                                                                                                                                                                                                                                                                          | High      |
| 30                              | 6.03 | Is the taxon likely to hybridise naturally with native taxa?                                                                                                                              | Yes | Introduced <i>S. fontinalis</i> may be having detrimental effects on native <i>Salmo trutta</i> reproduction through subtle hybridization behaviour, which was manifested by consistent spatial and temporal overlap in redd sites and spawning periods, mixed-species spawning groups, inter-specific subordinate males, and the occurrence of natural (tiger trout) hybrids (Cucherousset et al., 2017). | Very high |
| 31                              | 6.04 | Is the taxon likely to be hermaphroditic or to display asexual reproduction?                                                                                                              | No  | No information found.                                                                                                                                                                                                                                                                                                                                                                                      | Low       |
| 32                              | 6.05 | Is the taxon dependent on the presence of another taxon (or specific habitat features) to complete its life cycle?                                                                        | Yes | Primarily, brook trout require cool, clear, and clean waters to survive (Karas, 1997).                                                                                                                                                                                                                                                                                                                     | High      |
| 33                              | 6.06 | Is the taxon known (or likely) to produce a large number of propagules or offspring within a short time span (e.g. < 1 year)?                                                             | Yes | The eggs are large, 3.5–5.0 mm in diameter, with the number deposited depending on the size of the female, varying from 100 for a 144 mm TL female to 5000 eggs for a 565 mm TL female                                                                                                                                                                                                                     | High      |
| 34                              | 6.07 | How many time units (days, months, years) does the taxon require to reach the age-at-first-reproduction?                                                                                  | 2   | <i>S. fontinalis</i> reach sexual maturity after two to four years (cabi.org).                                                                                                                                                                                                                                                                                                                             | High      |
| <b>7. Dispersal mechanisms</b>  |      |                                                                                                                                                                                           |     |                                                                                                                                                                                                                                                                                                                                                                                                            |           |
| 35                              | 7.01 | How many potential internal vectors/pathways could the taxon use to disperse within the RA area (with suitable vectors/pathways)?                                                         | >1  | The primary pathway of introduction for the brook trout is intentional stocking for the enhancement of sport fishing opportunities, than escapes from hatcheries (Jansson, 2013);                                                                                                                                                                                                                          | High      |
| 36                              | 7.02 | Will any of these vectors/pathways bring the taxon in close proximity to one or more protected areas (e.g. MCZ, MPA, SSSI)?                                                               | No  | As <i>Salvelinus fontinalis</i> was introduced into the river Vlasina, it is very close to spreading in the Landscape Of Outstanding Features "Vlasina".                                                                                                                                                                                                                                                   | Low       |
| 37                              | 7.03 | Does the taxon have a means of actively attaching itself to hard substrata (e.g. ship hulls, pilings, buoys) such that it enhances the likelihood of dispersal?                           | No  | No information found.                                                                                                                                                                                                                                                                                                                                                                                      | Low       |
| 38                              | 7.04 | Is natural dispersal of the taxon likely to occur as eggs (for animals) or as propagules (for plants: seeds, spores) in the RA area?                                                      | No  | No information found.                                                                                                                                                                                                                                                                                                                                                                                      | Low       |
| 39                              | 7.05 | Is natural dispersal of the taxon likely to occur as larvae/juveniles (for animals) or as fragments/seedlings (for plants) in the RA area?                                                | Yes | Young of the year washed downstream by water, adults naturally dispersed through migration (cabi.org)                                                                                                                                                                                                                                                                                                      | Low       |
| 40                              | 7.06 | Are older life stages of the taxon likely to migrate in the RA area for reproduction?                                                                                                     | Yes | Some populations of brook trout also display a life history similar to that of anadromy, but instead of migrating out to sea they migrate from their natal streams to large bodies of freshwater such as the Great Lakes (Karas, 1997).                                                                                                                                                                    | Medium    |
| 41                              | 7.07 | Are propagules or eggs of the taxon likely to be dispersed in the RA area by other animals?                                                                                               | No  | No information found.                                                                                                                                                                                                                                                                                                                                                                                      | Low       |
| 42                              | 7.08 | Is dispersal of the taxon along any of the vectors/pathways mentioned in the previous seven questions (35–41; i.e. both unintentional or intentional) likely to be?                       | Yes | Intentional dispersal due to water enrichment due to sport fishing.                                                                                                                                                                                                                                                                                                                                        | Medium    |
| 43                              | 7.09 | Is dispersal of the taxon density dependent?                                                                                                                                              | Yes | Brook trout will migrate when space and resources become limited (Karas, 1997)                                                                                                                                                                                                                                                                                                                             | Very high |
| <b>8. Tolerance attributes</b>  |      |                                                                                                                                                                                           |     |                                                                                                                                                                                                                                                                                                                                                                                                            |           |
| 44                              | 8.01 | Is the taxon able to withstand being out of water for extended periods (e.g. minimum of one or more hours) at some stage of its life cycle?                                               | No  | No information found.                                                                                                                                                                                                                                                                                                                                                                                      | Low       |
| 45                              | 8.02 | Is the taxon tolerant of a wide range of water quality conditions relevant to that taxon? [In the Justification field, indicate the relevant water quality variable(s) being considered.] | No  | The most important factor influencing the establishment of brook trout populations is temperature (Karas, 1997). If the introduced waters have temperatures outside of their optimum range, establishment of a self-sustaining population will be extremely difficult if not impossible (Seitz, 2014).                                                                                                     | Medium    |

|                          |      |                                                                                                                                                              |           |                                                                                                                                                                                                                                                                                                                                                                                                                                                                                                                                                                                                   |           |
|--------------------------|------|--------------------------------------------------------------------------------------------------------------------------------------------------------------|-----------|---------------------------------------------------------------------------------------------------------------------------------------------------------------------------------------------------------------------------------------------------------------------------------------------------------------------------------------------------------------------------------------------------------------------------------------------------------------------------------------------------------------------------------------------------------------------------------------------------|-----------|
| 46                       | 8.03 | Can the taxon be controlled or eradicated in the wild with chemical, biological, or other agents/means?                                                      | Yes       | This is typically done by physical means such as, trapping, netting, and electrofishing and most likely has to be performed at regular intervals to keep abundances down (Britton et al., 2011). There has also been recent attempts at controlling populations using "daughterless technology" which involves the release of genetically engineered fish that produce a biased sex ratio towards males when they mate (Britton et al., 2011; Idaho F&G). This will hopefully reduce the population's ability to reproduce and result in negative population growth rates (Britton et al., 2011). | Very high |
| 47                       | 8.04 | Is the taxon likely to tolerate or benefit from environmental/human disturbance?                                                                             | No        | No information found.                                                                                                                                                                                                                                                                                                                                                                                                                                                                                                                                                                             | Low       |
| 48                       | 8.05 | Is the taxon able to tolerate salinity levels that are higher or lower than those found in its usual environment?                                            | No        | No information found.                                                                                                                                                                                                                                                                                                                                                                                                                                                                                                                                                                             | Low       |
| 49                       | 8.06 | Are there effective natural enemies (predators) of the taxon present in the RA area?                                                                         | Yes       | Natural enemies of <i>S. fontinalis</i> include larger fish, piscivorous birds (including mergansers and kingfishers), and mammals such as otters and bears (cabi.org).                                                                                                                                                                                                                                                                                                                                                                                                                           | Medium    |
| <b>C. Climate change</b> |      |                                                                                                                                                              |           |                                                                                                                                                                                                                                                                                                                                                                                                                                                                                                                                                                                                   |           |
| <b>9. Climate change</b> |      |                                                                                                                                                              |           |                                                                                                                                                                                                                                                                                                                                                                                                                                                                                                                                                                                                   |           |
| 50                       | 9.01 | Under the predicted future climatic conditions, are the risks of entry into the RA area posed by the taxon likely to increase, decrease or not change?       | No change | Studies have shown that an increase in temperature leads to an increase in <i>S. fontinalis</i> mortality of all age stages. In contrast, extreme low summer flows reduced survival of large fish, but only in small tributaries, and had no significant effects on fish in smaller size classes in any location (CL Xu et al., 2010).                                                                                                                                                                                                                                                            | Medium    |
| 51                       | 9.02 | Under the predicted future climatic conditions, are the risks of establishment posed by the taxon likely to increase, decrease or not change?                | Decrease  | Studies have shown that an increase in temperature leads to an increase in <i>S. fontinalis</i> mortality of all age stages. In contrast, extreme low summer flows reduced survival of large fish, but only in small tributaries, and had no significant effects on fish in smaller size classes in any location (CL Xu et al., 2010).                                                                                                                                                                                                                                                            | Medium    |
| 52                       | 9.03 | Under the predicted future climatic conditions, are the risks of dispersal within the RA area posed by the taxon likely to increase, decrease or not change? | Decrease  | Studies have shown that an increase in temperature leads to an increase in <i>S. fontinalis</i> mortality of all age stages. In contrast, extreme low summer flows reduced survival of large fish, but only in small tributaries, and had no significant effects on fish in smaller size classes in any location (CL Xu et al., 2010).                                                                                                                                                                                                                                                            | Medium    |
| 53                       | 9.04 | Under the predicted future climatic conditions, what is the likely magnitude of future potential impacts on biodiversity and/or ecological integrity/status? | Lower     | Studies have shown that an increase in temperature leads to an increase in <i>S. fontinalis</i> mortality of all age stages. In contrast, extreme low summer flows reduced survival of large fish, but only in small tributaries, and had no significant effects on fish in smaller size classes in any location (CL Xu et al., 2010).                                                                                                                                                                                                                                                            | Medium    |
| 54                       | 9.05 | Under the predicted future climatic conditions, what is the likely magnitude of future potential impacts on ecosystem structure and/or function?             | Lower     | Studies have shown that an increase in temperature leads to an increase in <i>S. fontinalis</i> mortality of all age stages. In contrast, extreme low summer flows reduced survival of large fish, but only in small tributaries, and had no significant effects on fish in smaller size classes in any location (CL Xu et al., 2010).                                                                                                                                                                                                                                                            | Medium    |
| 55                       | 9.06 | Under the predicted future climatic conditions, what is the likely magnitude of future potential impacts on ecosystem services/socio-economic factors?       | Lower     | Studies have shown that an increase in temperature leads to an increase in <i>S. fontinalis</i> mortality of all age stages. In contrast, extreme low summer flows reduced survival of large fish, but only in small tributaries, and had no significant effects on fish in smaller size classes in any location (CL Xu et al., 2010).                                                                                                                                                                                                                                                            | Medium    |

| Statistics                                     |              |
|------------------------------------------------|--------------|
| Scores                                         |              |
| <b>BRA</b>                                     | <b>7.0</b>   |
| <b>BRA Outcome</b>                             | <b>-</b>     |
| <b>BRA+CCA</b>                                 | <b>-3.0</b>  |
| <b>BRA+CCA Outcome</b>                         | <b>-</b>     |
| Score partition                                |              |
| <b>A. Biogeography/Historical</b>              | <b>6.0</b>   |
| 1. Domestication/Cultivation                   | 4.0          |
| 2. Climate, distribution and introduction risk | 2.0          |
| 3. Invasive elsewhere                          | 0.0          |
| <b>B. Biology/Ecology</b>                      | <b>1.0</b>   |
| 4. Undesirable (or persistence) traits         | 4.0          |
| 5. Resource exploitation                       | 0.0          |
| 6. Reproduction                                | 1.0          |
| 7. Dispersal mechanisms                        | 2.0          |
| 8. Tolerance attributes                        | -6.0         |
| <b>C. Climate change</b>                       | <b>-10.0</b> |
| 9. Climate change                              | -10.0        |
| Answered Questions                             |              |
| <b>Total</b>                                   | <b>55</b>    |
| <b>A. Biogeography/Historical</b>              | <b>13</b>    |
| 1. Domestication/Cultivation                   | 3            |
| 2. Climate, distribution and introduction risk | 5            |
| 3. Invasive elsewhere                          | 5            |
| <b>B. Biology/Ecology</b>                      | <b>36</b>    |
| 4. Undesirable (or persistence) traits         | 12           |
| 5. Resource exploitation                       | 2            |
| 6. Reproduction                                | 7            |
| 7. Dispersal mechanisms                        | 9            |
| 8. Tolerance attributes                        | 6            |
| <b>C. Climate change</b>                       | <b>6</b>     |
| 9. Climate change                              | 6            |
| Sectors affected                               |              |
| <b>Commercial</b>                              | <b>7</b>     |
| <b>Environmental</b>                           | <b>-3</b>    |
| <b>Species or population nuisance traits</b>   | <b>-3</b>    |

| Thresholds     |          |
|----------------|----------|
| <b>BRA</b>     | <b>-</b> |
| <b>BRA+CCA</b> | <b>-</b> |

| Confidence |         |      |
|------------|---------|------|
|            | BRA+CCA | 0.52 |
|            | BRA     | 0.53 |
|            | CCA     | 0.50 |

| Date and Time       |  |
|---------------------|--|
| 28/05/2021 09:08:57 |  |

AS-ISK v2

| Taxon and Assessor details         |                                         |
|------------------------------------|-----------------------------------------|
| Category                           | Fishes and Lampreys (freshwater)        |
| Taxon name                         | <i>Salvelinus fontinalis</i>            |
| Common name                        | brook trout                             |
| Assessor                           | Tena Radocaj                            |
| Risk screening context             |                                         |
| Reason and socio-economic benefits |                                         |
| Risk assessment area               | Danube & Adriatic basins BA, HR, ME, RS |
| Taxonomy                           |                                         |
| Native range                       |                                         |
| Introduced range                   |                                         |
| URL                                |                                         |

|                                                |      | Response                                                                                                                                                                | Justification (references and/or other information) | Confidence                                                                                                                                                                                                                                                                                                                                                                                                                                                                                                                                 |           |
|------------------------------------------------|------|-------------------------------------------------------------------------------------------------------------------------------------------------------------------------|-----------------------------------------------------|--------------------------------------------------------------------------------------------------------------------------------------------------------------------------------------------------------------------------------------------------------------------------------------------------------------------------------------------------------------------------------------------------------------------------------------------------------------------------------------------------------------------------------------------|-----------|
| A. Biogeography/Historical                     |      |                                                                                                                                                                         |                                                     |                                                                                                                                                                                                                                                                                                                                                                                                                                                                                                                                            |           |
| 1. Domestication/Cultivation                   |      |                                                                                                                                                                         |                                                     |                                                                                                                                                                                                                                                                                                                                                                                                                                                                                                                                            |           |
| 1                                              | 1.01 | Has the taxon been the subject of domestication (or cultivation) for at least 20 generations?                                                                           | Yes                                                 | Kottelat, M. & Freyhof, J. 2007. Handbook of European Freshwater Fishes. Kottelat, Cornol and Freyhof, Berlin, xiv + 646 pp.                                                                                                                                                                                                                                                                                                                                                                                                               | Very high |
| 2                                              | 1.02 | Is the taxon harvested in the wild and likely to be sold or used in its live form?                                                                                      | Yes                                                 | In aquaculture, but not in Croatia                                                                                                                                                                                                                                                                                                                                                                                                                                                                                                         | Low       |
| 3                                              | 1.03 | Does the taxon have invasive races, varieties, sub-taxa or congeners?                                                                                                   | No                                                  | Kottelat, M. & Freyhof, J. 2007. Handbook of European Freshwater Fishes. Kottelat, Cornol and Freyhof, Berlin, xiv + 646 pp.                                                                                                                                                                                                                                                                                                                                                                                                               | Very high |
| 2. Climate, distribution and introduction risk |      |                                                                                                                                                                         |                                                     |                                                                                                                                                                                                                                                                                                                                                                                                                                                                                                                                            |           |
| 4                                              | 2.01 | How similar are the climatic conditions of the Risk Assessment (RA) area and the taxon's native range?                                                                  | High                                                | Kottelat, M. & Freyhof, J. 2007. Handbook of European Freshwater Fishes. Kottelat, Cornol and Freyhof, Berlin, xiv + 646 pp. The similarity between climatic conditions RA area and native range is high. I use climatch                                                                                                                                                                                                                                                                                                                   | Very high |
| 5                                              | 2.02 | What is the quality of the climate matching data?                                                                                                                       | High                                                | Kottelat, M. & Freyhof, J. 2007. Handbook of European Freshwater Fishes. Kottelat, Cornol and Freyhof, Berlin, xiv + 646 pp. The quality of the climate matching data is high.                                                                                                                                                                                                                                                                                                                                                             | High      |
| 6                                              | 2.03 | Is the taxon already present outside of captivity in the RA area?                                                                                                       | Yes                                                 | S. fontinalis is present outside of captivity in the RA area                                                                                                                                                                                                                                                                                                                                                                                                                                                                               | High      |
| 7                                              | 2.04 | How many potential vectors could the taxon use to enter in the RA area?                                                                                                 | None                                                | S. fontinalis is present in the RA area                                                                                                                                                                                                                                                                                                                                                                                                                                                                                                    | High      |
| 8                                              | 2.05 | Is the taxon currently found in close proximity to, and likely to enter into, the RA area in the near future (e.g. unintentional and intentional introductions)?        | Not applicable                                      | S. fontinalis is present in the RA area                                                                                                                                                                                                                                                                                                                                                                                                                                                                                                    | High      |
| 3. Invasive elsewhere                          |      |                                                                                                                                                                         |                                                     |                                                                                                                                                                                                                                                                                                                                                                                                                                                                                                                                            |           |
| 9                                              | 3.01 | Has the taxon become naturalised (established viable populations) outside its                                                                                           | Yes                                                 | Kottelat, M. & Freyhof, J. 2007. Handbook of European Freshwater Fishes. Kottelat, Cornol and Freyhof, Berlin, xiv + 646 pp                                                                                                                                                                                                                                                                                                                                                                                                                | Very high |
| 10                                             | 3.02 | In the taxon's introduced range, are there known adverse impacts to wild stocks or commercial taxa?                                                                     | Yes                                                 | Kottelat, M. & Freyhof, J. 2007. Handbook of European Freshwater Fishes. Kottelat, Cornol and Freyhof, Berlin, xiv + 646 pp                                                                                                                                                                                                                                                                                                                                                                                                                | Very high |
| 11                                             | 3.03 | In the taxon's introduced range, are there known adverse impacts to aquaculture?                                                                                        | Yes                                                 | Kottelat, M. & Freyhof, J. 2007. Handbook of European Freshwater Fishes. Kottelat, Cornol and Freyhof, Berlin, xiv + 646 pp                                                                                                                                                                                                                                                                                                                                                                                                                | High      |
| 12                                             | 3.04 | In the taxon's introduced range, are there known adverse impacts to ecosystem                                                                                           | Yes                                                 | Kottelat, M. & Freyhof, J. 2007. Handbook of European Freshwater Fishes. Kottelat, Cornol and Freyhof, Berlin, xiv + 646 pp                                                                                                                                                                                                                                                                                                                                                                                                                | Medium    |
| 13                                             | 3.05 | In the taxon's introduced range, are there known adverse socio-economic impacts?                                                                                        | No                                                  | S. fontinalis is mainly used for sports fisheries, so there is an economic benefit for individual fishermen as well as the creation of jobs in the aquaculture industry. In addition to the value of S. fontinalis for individual fishermen, recreational fishing and tourism may create a demand not only for food, accommodation and transportation, but also for related recreational activities such as camping, boating, canoeing, etc. (CABI)                                                                                        | Low       |
| B. Biology/Ecology                             |      |                                                                                                                                                                         |                                                     |                                                                                                                                                                                                                                                                                                                                                                                                                                                                                                                                            |           |
| 4. Undesirable (or persistence) traits         |      |                                                                                                                                                                         |                                                     |                                                                                                                                                                                                                                                                                                                                                                                                                                                                                                                                            |           |
| 14                                             | 4.01 | Is it likely that the taxon will be poisonous or pose other risks to human health?                                                                                      | No                                                  | Kottelat, M. & Freyhof, J. 2007. Handbook of European Freshwater Fishes. Kottelat, Cornol and Freyhof, Berlin, xiv + 646 pp                                                                                                                                                                                                                                                                                                                                                                                                                | Very high |
| 15                                             | 4.02 | Is it likely that the taxon will smother one or more native taxa (that are not threatened or protected)?                                                                | Yes                                                 | Kottelat, M. and J. Freyhof 2007 Handbook of European freshwater fishes. Publications Kottelat, Cornol, Switzerland.                                                                                                                                                                                                                                                                                                                                                                                                                       | High      |
| 16                                             | 4.03 | Are there any threatened or protected taxa that the non-native taxon would parasitise in the RA area?                                                                   | No                                                  | Kottelat, M. and J. Freyhof 2007 Handbook of European freshwater fishes. Publications Kottelat, Cornol, Switzerland.                                                                                                                                                                                                                                                                                                                                                                                                                       | Very high |
| 17                                             | 4.04 | Is the taxon adaptable in terms of climatic and other environmental conditions, thus enhancing its potential persistence if it has invaded or could invade the RA area? | Yes                                                 | This species adaptable in terms of climatic and other environmental conditions.                                                                                                                                                                                                                                                                                                                                                                                                                                                            | Medium    |
| 18                                             | 4.05 | Is the taxon likely to disrupt food-web structure/function in aquatic ecosystems if it has invaded or is likely to invade the RA                                        | No                                                  | Maybe, they can influence on food-web structure/function in aquatic ecosystem.                                                                                                                                                                                                                                                                                                                                                                                                                                                             | Low       |
| 19                                             | 4.06 | Is the taxon likely to exert adverse impacts on ecosystem services in the RA area?                                                                                      | No                                                  | no data for Croatia                                                                                                                                                                                                                                                                                                                                                                                                                                                                                                                        | Low       |
| 20                                             | 4.07 | Is it likely that the taxon will host, and/or act as a vector for, recognised pests and infectious agents that are endemic in the RA                                    | Yes                                                 | Yes, the taxon may be a host or vector of known pests and infectious agents endemic to RA area. Because in every area exist infectious agents and pests.                                                                                                                                                                                                                                                                                                                                                                                   | Low       |
| 21                                             | 4.08 | Is it likely that the taxon will host, and/or act as a vector for, recognised pests and infectious agents that are absent from (novel to) the RA area?                  | Yes                                                 | Pathogenic bacterium Renibacterium salmoninarum causes kidney disease with high mortality rate and considerable economic losses in salmonid farming. Infections caused by Flavobacterium columnare are much-feared bacterioses, which have economically significant mortality. (Vardić, I., Kapetanović, D., Vailić, D., Kurtović, B., Teskeredžić, Z., & Teskeredžić, E. (2007). DETECTION OF RENIBACTERIUM SALMONINARUM IN TISSUE OF BROOK TROUT (SALVELINUS FONTINALIS) BY NESTED RT-PCR. Croatian Journal of Fisheries. 65(1). 15-24.) | Low       |



|                                 |      |                                                                                                                                                                              |                |                                                                                                                                                                                           |           |
|---------------------------------|------|------------------------------------------------------------------------------------------------------------------------------------------------------------------------------|----------------|-------------------------------------------------------------------------------------------------------------------------------------------------------------------------------------------|-----------|
| 22                              | 4.09 | Is it likely that the taxon will achieve a body size that will make it more likely to be released from captivity?                                                            | Yes            | Kottelat, M. and J. Freyhof 2007 Handbook of European freshwater fishes. Publications Kottelat, Cornol, Switzerland.                                                                      | Very high |
| 23                              | 4.10 | Is the taxon capable of sustaining itself in a range of water velocity conditions (e.g. versatile in habitat use)?                                                           | Yes            | Kottelat, M. and J. Freyhof 2007 Handbook of European freshwater fishes. Publications Kottelat, Cornol, Switzerland.                                                                      | Very high |
| 24                              | 4.11 | Is it likely that the taxon's mode of existence (e.g. excretion of by-products) or behaviours (e.g. feeding) will reduce habitat quality for native taxa?                    | No             | Kottelat, M. and J. Freyhof 2007 Handbook of European freshwater fishes. Publications Kottelat, Cornol, Switzerland.                                                                      | High      |
| 25                              | 4.12 | Is the taxon likely to maintain a viable population even when present in low densities (or persisting in adverse conditions by way of a dormant form)?                       | Yes            | Kottelat, M. and J. Freyhof 2007 Handbook of European freshwater fishes. Publications Kottelat, Cornol, Switzerland.                                                                      | Very high |
| <b>5. Resource exploitation</b> |      |                                                                                                                                                                              |                |                                                                                                                                                                                           |           |
| 26                              | 5.01 | Is the taxon likely to consume threatened or protected native taxa in the RA area?                                                                                           | Yes            | It is possible that it consume endangered and protected native taxa in the RA area. If there are protected taxa in the RA area will consume them, whether or not the taxon is endangered. | Low       |
| 27                              | 5.02 | Is the taxon likely to sequester food resources (including nutrients) to the detriment of native taxa in the RA area?                                                        | Not applicable | not applicable                                                                                                                                                                            | Very high |
| <b>6. Reproduction</b>          |      |                                                                                                                                                                              |                |                                                                                                                                                                                           |           |
| 28                              | 6.01 | Is the taxon likely to exhibit parental care and/or to reduce age-at-maturity in response to environmental conditions?                                                       | No             | Kottelat, M. and J. Freyhof 2007 Handbook of European freshwater fishes. Publications Kottelat, Cornol, Switzerland.                                                                      | Very high |
| 29                              | 6.02 | Is the taxon likely to produce viable gametes or propagules (in the RA area)?                                                                                                | Yes            | Kottelat, M. and J. Freyhof 2007 Handbook of European freshwater fishes. Publications Kottelat, Cornol, Switzerland.                                                                      | Very high |
| 30                              | 6.03 | Is the taxon likely to hybridise naturally with native taxa?                                                                                                                 | Yes            | Kottelat, M. and J. Freyhof 2007 Handbook of European freshwater fishes. Publications Kottelat, Cornol, Switzerland. (with <i>S. trutta</i> )                                             | Very high |
| 31                              | 6.04 | Is the taxon likely to be hermaphroditic or to display asexual reproduction?                                                                                                 | No             | Kottelat, M. and J. Freyhof 2007 Handbook of European freshwater fishes. Publications Kottelat, Cornol, Switzerland.                                                                      | Very high |
| 32                              | 6.05 | Is the taxon dependent on the presence of another taxon (or specific habitat features) to complete its life cycle?                                                           | No             | Kottelat, M. and J. Freyhof 2007 Handbook of European freshwater fishes. Publications Kottelat, Cornol, Switzerland.                                                                      | Very high |
| 33                              | 6.06 | Is the taxon known (or likely) to produce a large number of propagules or offspring within a short time span (e.g. < 1 year)?                                                | No             | Kottelat, M. and J. Freyhof 2007 Handbook of European freshwater fishes. Publications Kottelat, Cornol, Switzerland.                                                                      | Very high |
| 34                              | 6.07 | How many time units (days, months, years) does the taxon require to reach the age-at-first-reproduction?                                                                     | 2              | Kottelat, M. and J. Freyhof 2007 Handbook of European freshwater fishes. Publications Kottelat, Cornol, Switzerland.                                                                      | Very high |
| <b>7. Dispersal mechanisms</b>  |      |                                                                                                                                                                              |                |                                                                                                                                                                                           |           |
| 35                              | 7.01 | How many potential internal vectors/pathways could the taxon use to disperse within the RA area (with suitable vectors/pathways)?                                            | >1             | 1. Young of the year wash downstream by water, adults naturally disperse through migration. 2. Introduced for angling 3. flooding                                                         | High      |
| 36                              | 7.02 | Will any of these vectors/pathways bring the taxon in close proximity to one or more protected areas (e.g. MCZ, MPA, SSSI)?                                                  | No             | No any of this vectors/pathways bring the taxon in close proximity in the protected areas.                                                                                                | Low       |
| 37                              | 7.03 | Does the taxon have a means of actively attaching itself to hard substrata (e.g. ship hulls, pilings, buoys) such that it enhances the likelihood of dispersal?              | No             | no                                                                                                                                                                                        | High      |
| 38                              | 7.04 | Is natural dispersal of the taxon likely to occur as eggs (for animals) or as propagules (for plants: seeds, spores) in the RA area?                                         | No             | Kottelat, M. and J. Freyhof 2007 Handbook of European freshwater fishes. Publications Kottelat, Cornol, Switzerland.                                                                      | Very high |
| 39                              | 7.05 | Is natural dispersal of the taxon likely to occur as larvae/juveniles (for animals) or as fragments/seedlings (for plants) in the RA area?                                   | No             | Kottelat, M. and J. Freyhof 2007 Handbook of European freshwater fishes. Publications Kottelat, Cornol, Switzerland.                                                                      | Medium    |
| 40                              | 7.06 | Are older life stages of the taxon likely to migrate in the RA area for reproduction?                                                                                        | Yes            | Kottelat, M. and J. Freyhof 2007 Handbook of European freshwater fishes. Publications Kottelat, Cornol, Switzerland.                                                                      | High      |
| 41                              | 7.07 | Are propagules or eggs of the taxon likely to be dispersed in the RA area by other animals?                                                                                  | No             | Kottelat, M. and J. Freyhof 2007 Handbook of European freshwater fishes. Publications Kottelat, Cornol, Switzerland.                                                                      | Very high |
| 42                              | 7.08 | Is dispersal of the taxon along any of the vectors/pathways mentioned in the previous seven questions (35–41; i.e. both unintentional or intentional) likely to be           | Yes            | There is a possibility of a high rate of spread of taxa. Eg. if a fertilized individual enters a new area by any means of expansion.                                                      | Low       |
| 43                              | 7.09 | Is dispersal of the taxon density dependent?                                                                                                                                 | No             | Kottelat, M. and J. Freyhof 2007 Handbook of European freshwater fishes. Publications Kottelat, Cornol, Switzerland.                                                                      | Very high |
| <b>8. Tolerance attributes</b>  |      |                                                                                                                                                                              |                |                                                                                                                                                                                           |           |
| 44                              | 8.01 | Is the taxon able to withstand being out of water for extended periods (e.g. minimum of one or more hours) at some stage of its life cycle?                                  | No             | Kottelat, M. and J. Freyhof 2007 Handbook of European freshwater fishes. Publications Kottelat, Cornol, Switzerland.                                                                      | Very high |
| 45                              | 8.02 | Is the taxon tolerant of a wide range of water quality conditions relevant to that taxon? [In the Justification field, indicate the relevant water quality variable(s) being | No             | Kottelat, M. and J. Freyhof 2007 Handbook of European freshwater fishes. Publications Kottelat, Cornol, Switzerland.                                                                      | Very high |
| 46                              | 8.03 | Can the taxon be controlled or eradicated in the wild with chemical, biological, or other agents/means?                                                                      | Not applicable | Kottelat, M. and J. Freyhof 2007 Handbook of European freshwater fishes. Publications Kottelat, Cornol, Switzerland.                                                                      | Very high |
| 47                              | 8.04 | Is the taxon likely to tolerate or benefit from environmental/human disturbance?                                                                                             | No             | Kottelat, M. and J. Freyhof 2007 Handbook of European freshwater fishes. Publications Kottelat, Cornol, Switzerland.                                                                      | High      |
| 48                              | 8.05 | Is the taxon able to tolerate salinity levels that are higher or lower than those found in its usual environment?                                                            | Yes            | Kottelat, M. and J. Freyhof 2007 Handbook of European freshwater fishes. Publications Kottelat, Cornol, Switzerland.                                                                      | Low       |
| 49                              | 8.06 | Are there effective natural enemies (predators) of the taxon present in the RA                                                                                               | Yes            | Natural enemies of <i>S. fontinalis</i> include larger fish, piscivorous birds (including mergansers and kingfishers) (CABI)                                                              | Medium    |
| <b>C. Climate change</b>        |      |                                                                                                                                                                              |                |                                                                                                                                                                                           |           |
| <b>9. Climate change</b>        |      |                                                                                                                                                                              |                |                                                                                                                                                                                           |           |

|    |      |                                                                                                                                                              |                |                                                                                                                                                                                                                                                                                                                                                                                                                                                                                                                                                                      |           |
|----|------|--------------------------------------------------------------------------------------------------------------------------------------------------------------|----------------|----------------------------------------------------------------------------------------------------------------------------------------------------------------------------------------------------------------------------------------------------------------------------------------------------------------------------------------------------------------------------------------------------------------------------------------------------------------------------------------------------------------------------------------------------------------------|-----------|
| 50 | 9.01 | Under the predicted future climatic conditions, are the risks of entry into the RA area posed by the taxon likely to increase, decrease or not change?       | Not applicable | not applicable                                                                                                                                                                                                                                                                                                                                                                                                                                                                                                                                                       | Very high |
| 51 | 9.02 | Under the predicted future climatic conditions, are the risks of establishment posed by the taxon likely to increase, decrease or not change?                | Decrease       | The risks of establishment S.trutta is decreased. Reason for that is increased temperatures because its catch has dramatically declined in several parts of Europe. (Trumbo, B., Hudy, M., Smith, E. P., Kim, D. Y., Wiggins, B. A., Nislow, K. H., & Dolloff, C. A. (2010, September). Sensitivity and vulnerability of brook trout populations to climate change. In Wild trout X: conserving wild trout. Wild Trout Symposium, West Yellowstone, Montana (pp. 62-68)                                                                                              | Low       |
| 52 | 9.03 | Under the predicted future climatic conditions, are the risks of dispersal within the RA area posed by the taxon likely to increase, decrease or not change? | Decrease       | Effects of climate change could be particularly profound for wild trout and aquatic ecosystems. The biology of salmonids is largely dependent on temperature and flow. The risk of spread in the RA area is reduced. Temperatures are a major problem therefore. (Trumbo, B., Hudy, M., Smith, E. P., Kim, D. Y., Wiggins, B. A., Nislow, K. H., & Dolloff, C. A. (2010, September). Sensitivity and vulnerability of brook trout populations to climate change. In Wild trout X: conserving wild trout. Wild Trout Symposium, West Yellowstone, Montana (pp. 62-68) | Low       |
| 53 | 9.04 | Under the predicted future climatic conditions, what is the likely magnitude of future potential impacts on biodiversity and/or ecological integrity/status? | Lower          | Lower (Trumbo, B., Hudy, M., Smith, E. P., Kim, D. Y., Wiggins, B. A., Nislow, K. H., & Dolloff, C. A. (2010, September). Sensitivity and vulnerability of brook trout populations to climate change. In Wild trout X: conserving wild trout. Wild Trout Symposium, West Yellowstone, Montana (pp. 62-68)                                                                                                                                                                                                                                                            | Low       |
| 54 | 9.05 | Under the predicted future climatic conditions, what is the likely magnitude of future potential impacts on ecosystem structure and/or function?             | Lower          | It is likely to no have impact on the ecosystem and system functioning. (Trumbo, B., Hudy, M., Smith, E. P., Kim, D. Y., Wiggins, B. A., Nislow, K. H., & Dolloff, C. A. (2010, September). Sensitivity and vulnerability of brook trout populations to climate change. In Wild trout X: conserving wild trout. Wild Trout Symposium, West Yellowstone, Montana (pp. 62-68)                                                                                                                                                                                          | Low       |
| 55 | 9.06 | Under the predicted future climatic conditions, what is the likely magnitude of future potential impacts on ecosystem services/socio-economic factors?       | No change      | Trumbo, B., Hudy, M., Smith, E. P., Kim, D. Y., Wiggins, B. A., Nislow, K. H., & Dolloff, C. A. (2010, September). Sensitivity and vulnerability of brook trout populations to climate change. In Wild trout X: conserving wild trout. Wild Trout Symposium, West Yellowstone, Montana (pp. 62-68)                                                                                                                                                                                                                                                                   | Low       |

| Statistics                                     |             |
|------------------------------------------------|-------------|
| Scores                                         |             |
| <b>BRA</b>                                     | <b>28.0</b> |
| <b>BRA Outcome</b>                             | <b>-</b>    |
| <b>BRA+CCA</b>                                 | <b>20.0</b> |
| <b>BRA+CCA Outcome</b>                         | <b>-</b>    |
| Score partition                                |             |
| <b>A. Biogeography/Historical</b>              | <b>16.0</b> |
| 1. Domestication/Cultivation                   | 2.0         |
| 2. Climate, distribution and introduction risk | 0.0         |
| 3. Invasive elsewhere                          | 14.0        |
| <b>B. Biology/Ecology</b>                      | <b>12.0</b> |
| 4. Undesirable (or persistence) traits         | 7.0         |
| 5. Resource exploitation                       | 5.0         |
| 6. Reproduction                                | 2.0         |
| 7. Dispersal mechanisms                        | -1.0        |
| 8. Tolerance attributes                        | -1.0        |
| <b>C. Climate change</b>                       | <b>-8.0</b> |
| 9. Climate change                              | -8.0        |
| Answered Questions                             |             |
| <b>Total</b>                                   | <b>55</b>   |
| <b>A. Biogeography/Historical</b>              | <b>13</b>   |
| 1. Domestication/Cultivation                   | 3           |
| 2. Climate, distribution and introduction risk | 5           |
| 3. Invasive elsewhere                          | 5           |
| <b>B. Biology/Ecology</b>                      | <b>36</b>   |
| 4. Undesirable (or persistence) traits         | 12          |
| 5. Resource exploitation                       | 2           |
| 6. Reproduction                                | 7           |
| 7. Dispersal mechanisms                        | 9           |
| 8. Tolerance attributes                        | 6           |
| <b>C. Climate change</b>                       | <b>6</b>    |
| 9. Climate change                              | 6           |
| Sectors affected                               |             |
| <b>Commercial</b>                              | <b>13</b>   |
| <b>Environmental</b>                           | <b>5</b>    |
| <b>Species or population nuisance traits</b>   | <b>4</b>    |

| Thresholds     |             |
|----------------|-------------|
| <b>BRA</b>     | <b>-</b>    |
| <b>BRA+CCA</b> | <b>-</b>    |
| Confidence     |             |
| <b>BRA+CCA</b> | <b>0.71</b> |
| <b>BRA</b>     | <b>0.75</b> |
| <b>CCA</b>     | <b>0.38</b> |

| Date and Time       |  |
|---------------------|--|
| 02/06/2020 09:06:41 |  |

## AS-ISK v2

| Taxon and Assessor details         |                                         |
|------------------------------------|-----------------------------------------|
| Category                           | Fishes and Lampreys (freshwater)        |
| Taxon name                         | <i>Salvelinus namaycush</i>             |
| Common name                        | lake charr                              |
| Assessor                           | Ana Marić                               |
| Risk screening context             |                                         |
| Reason and socio-economic benefits |                                         |
| Risk assessment area               | Danube & Adriatic basins BA, HR, ME, RS |
| Taxonomy                           |                                         |
| Native range                       |                                         |
| Introduced range                   |                                         |
| URL                                |                                         |

|                                                |      | Response                                                                                                                                                                | Justification (references and/or other information) | Confidence                                                                                                                                                                                           |           |
|------------------------------------------------|------|-------------------------------------------------------------------------------------------------------------------------------------------------------------------------|-----------------------------------------------------|------------------------------------------------------------------------------------------------------------------------------------------------------------------------------------------------------|-----------|
| A. Biogeography/Historical                     |      |                                                                                                                                                                         |                                                     |                                                                                                                                                                                                      |           |
| 1. Domestication/Cultivation                   |      |                                                                                                                                                                         |                                                     |                                                                                                                                                                                                      |           |
| 1                                              | 1.01 | Has the taxon been the subject of domestication (or cultivation) for at least 20 generations?                                                                           | Yes                                                 | RESULTS OF LAKE TROUT STOCKINGS IN FINLAND 1957–81 A. Mutenia.1984                                                                                                                                   | Very high |
| 2                                              | 1.02 | Is the taxon harvested in the wild and likely to be sold or used in its live form?                                                                                      | Yes                                                 | RESULTS OF LAKE TROUT STOCKINGS IN FINLAND 1957–81 A. Mutenia.1984                                                                                                                                   | Very high |
| 3                                              | 1.03 | Does the taxon have invasive races, varieties, sub-taxa or congeners?                                                                                                   | Yes                                                 | S. fontinalis                                                                                                                                                                                        | Very high |
| 2. Climate, distribution and introduction risk |      |                                                                                                                                                                         |                                                     |                                                                                                                                                                                                      |           |
| 4                                              | 2.01 | How similar are the climatic conditions of the Risk Assessment (RA) area and the taxon's native range?                                                                  | Medium                                              | Cf tolerate                                                                                                                                                                                          | High      |
| 5                                              | 2.02 | What is the quality of the climate matching data?                                                                                                                       | Medium                                              | No comment                                                                                                                                                                                           | High      |
| 6                                              | 2.03 | Is the taxon already present outside of captivity in the RA area?                                                                                                       | No                                                  | Horzont species                                                                                                                                                                                      | Very high |
| 7                                              | 2.04 | How many potential vectors could the taxon use to enter in the RA area?                                                                                                 | One                                                 | Stocking.<br><a href="https://www.cabi.org/isc/datasheet/65327#tosummaryOfInvasiven">https://www.cabi.org/isc/datasheet/65327#tosummaryOfInvasiven</a>                                               | Very high |
| 8                                              | 2.05 | Is the taxon currently found in close proximity to, and likely to enter into, the RA area in the near future (e.g. unintentional and intentional introductions)?        | No                                                  | <a href="https://www.cabi.org/isc/datasheet/65327#tointroductions">https://www.cabi.org/isc/datasheet/65327#tointroductions</a>                                                                      | Very high |
| 3. Invasive elsewhere                          |      |                                                                                                                                                                         |                                                     |                                                                                                                                                                                                      |           |
| 9                                              | 3.01 | Has the taxon become naturalised (established viable populations) outside its                                                                                           | Yes                                                 | <a href="https://www.cabi.org/isc/datasheet/65327#tointroductions">https://www.cabi.org/isc/datasheet/65327#tointroductions</a>                                                                      | Very high |
| 10                                             | 3.02 | In the taxon's introduced range, are there known adverse impacts to wild stocks or commercial taxa?                                                                     | Yes                                                 | <a href="https://www.cabi.org/isc/datasheet/65327#toriskAndImpactFactor">https://www.cabi.org/isc/datasheet/65327#toriskAndImpactFactor</a> s                                                        | Very high |
| 11                                             | 3.03 | In the taxon's introduced range, are there known adverse impacts to aquaculture?                                                                                        | Yes                                                 | <a href="https://www.cabi.org/isc/datasheet/65327#toriskAndImpactFactor">https://www.cabi.org/isc/datasheet/65327#toriskAndImpactFactor</a> s                                                        | High      |
| 12                                             | 3.04 | In the taxon's introduced range, are there known adverse impacts to ecosystem                                                                                           | Yes                                                 | <a href="https://www.cabi.org/isc/datasheet/65327#toriskAndImpactFactor">https://www.cabi.org/isc/datasheet/65327#toriskAndImpactFactor</a> s                                                        | High      |
| 13                                             | 3.05 | In the taxon's introduced range, are there known adverse socio-economic impacts?                                                                                        | No                                                  | <a href="https://www.cabi.org/isc/datasheet/65327#toriskAndImpactFactor">https://www.cabi.org/isc/datasheet/65327#toriskAndImpactFactor</a> s                                                        | Very high |
| B. Biology / Ecology                           |      |                                                                                                                                                                         |                                                     |                                                                                                                                                                                                      |           |
| 4. Undesirable (or persistence) traits         |      |                                                                                                                                                                         |                                                     |                                                                                                                                                                                                      |           |
| 14                                             | 4.01 | Is it likely that the taxon will be poisonous or pose other risks to human health?                                                                                      | No                                                  | Kottelat, M. and J. Freyhof, 2007. Handbook of European freshwater fishes. Publications Kottelat, Cornol and Freyhof,                                                                                | Very high |
| 15                                             | 4.02 | Is it likely that the taxon will smother one or more native taxa (that are not threatened or protected)?                                                                | Yes                                                 | <a href="https://www.cabi.org/isc/datasheet/65327#toriskAndImpactFactor">https://www.cabi.org/isc/datasheet/65327#toriskAndImpactFactor</a> s                                                        | High      |
| 16                                             | 4.03 | Are there any threatened or protected taxa that the non-native taxon would parasitise in the RA area?                                                                   | No                                                  | Kottelat, M. and J. Freyhof, 2007. Handbook of European freshwater fishes. Publications Kottelat, Cornol and Freyhof, Berlin. 646 pp                                                                 | Very high |
| 17                                             | 4.04 | Is the taxon adaptable in terms of climatic and other environmental conditions, thus enhancing its potential persistence if it has invaded or could invade the RA area? | Yes                                                 | <a href="https://www.cabi.org/isc/datasheet/65327#toclimate">https://www.cabi.org/isc/datasheet/65327#toclimate</a>                                                                                  | Medium    |
| 18                                             | 4.05 | Is the taxon likely to disrupt food-web structure/function in aquatic ecosystems if it has invaded or is likely to invade the RA                                        | Yes                                                 | <a href="https://www.cabi.org/isc/datasheet/65327#toriskAndImpactFactor">https://www.cabi.org/isc/datasheet/65327#toriskAndImpactFactor</a> s                                                        | High      |
| 19                                             | 4.06 | Is the taxon likely to exert adverse impacts on ecosystem services in the RA area?                                                                                      | Yes                                                 | <a href="https://www.cabi.org/isc/datasheet/65327#tointroductions">https://www.cabi.org/isc/datasheet/65327#tointroductions</a>                                                                      | Medium    |
| 20                                             | 4.07 | Is it likely that the taxon will host, and/or act as a vector for, recognised pests and infectious agents that are endemic in the RA                                    | No                                                  | <a href="https://www.cabi.org/isc/datasheet/65327#toimpactSocial">https://www.cabi.org/isc/datasheet/65327#toimpactSocial</a>                                                                        | High      |
| 21                                             | 4.08 | Is it likely that the taxon will host, and/or act as a vector for, recognised pests and infectious agents that are absent from (novel to) the RA area?                  | Yes                                                 | <a href="https://www.cabi.org/isc/datasheet/65327#toimpactSocial">https://www.cabi.org/isc/datasheet/65327#toimpactSocial</a>                                                                        | High      |
| 22                                             | 4.09 | Is it likely that the taxon will achieve a body size that will make it more likely to be released from captivity?                                                       | Yes                                                 | <a href="https://www.cabi.org/isc/datasheet/65327#todescription">https://www.cabi.org/isc/datasheet/65327#todescription</a>                                                                          | Very high |
| 23                                             | 4.10 | Is the taxon capable of sustaining itself in a range of water velocity conditions (e.g. versatile in habitat use)?                                                      | Yes                                                 | Importance of rearing-unit design and stocking density to the behavior, growth and metabolism of lake trout (Salvelinus namaycush) Author links open overlay panelRobert MRossaBarnaby JWatten. 1998 | Very high |
| 24                                             | 4.11 | Is it likely that the taxon's mode of existence (e.g. excretion of by-products) or behaviours (e.g. feeding) will reduce habitat quality for native taxa?               | No                                                  | <a href="https://www.cabi.org/isc/datasheet/65327#towaterTolerances">https://www.cabi.org/isc/datasheet/65327#towaterTolerances</a>                                                                  | Medium    |

|                                 |      |                                                                                                                                                                              |           |                                                                                                                                                                                                                                                                                                                                         |           |
|---------------------------------|------|------------------------------------------------------------------------------------------------------------------------------------------------------------------------------|-----------|-----------------------------------------------------------------------------------------------------------------------------------------------------------------------------------------------------------------------------------------------------------------------------------------------------------------------------------------|-----------|
| 25                              | 4.12 | Is the taxon likely to maintain a viable population even when present in low densities (or persisting in adverse conditions by way of a dormant form)?                       | No        | <a href="https://www.cabi.org/isc/datasheet/65327#todistributionDatabase">https://www.cabi.org/isc/datasheet/65327#todistributionDatabase</a>                                                                                                                                                                                           | Medium    |
| <b>5. Resource exploitation</b> |      |                                                                                                                                                                              |           |                                                                                                                                                                                                                                                                                                                                         |           |
| 26                              | 5.01 | Is the taxon likely to consume threatened or protected native taxa in the RA area?                                                                                           | Yes       | <a href="https://www.cabi.org/isc/datasheet/65327#todistributionDatabase">https://www.cabi.org/isc/datasheet/65327#todistributionDatabase</a>                                                                                                                                                                                           | High      |
| 27                              | 5.02 | Is the taxon likely to sequester food resources (including nutrients) to the detriment of native taxa in the RA area?                                                        | Yes       | <a href="https://www.cabi.org/isc/datasheet/65327#todistributionDatabase">https://www.cabi.org/isc/datasheet/65327#todistributionDatabase</a>                                                                                                                                                                                           | High      |
| <b>6. Reproduction</b>          |      |                                                                                                                                                                              |           |                                                                                                                                                                                                                                                                                                                                         |           |
| 28                              | 6.01 | Is the taxon likely to exhibit parental care and/or to reduce age-at-maturity in response to environmental conditions?                                                       | Yes       | Life history differences parallel environmental differences among North American lake trout ( <i>Salvelinus namaycush</i> ) populations Jenni L. McDermid, Brian J. Shuter, and Nigel P. Lester. 2009                                                                                                                                   | High      |
| 29                              | 6.02 | Is the taxon likely to produce viable gametes or propagules (in the RA area)?                                                                                                | Yes       | <a href="https://www.cabi.org/isc/datasheet/65325#tohistoryOfIntroduction">https://www.cabi.org/isc/datasheet/65325#tohistoryOfIntroduction</a>                                                                                                                                                                                         | Medium    |
| 30                              | 6.03 | Is the taxon likely to hybridise naturally with native taxa?                                                                                                                 | Yes       | Survival, growth and sexual maturation of the tiger trout hybrid ( <i>Salmo trutta</i> ♀ × <i>Salvelinus fontinalis</i> ♂) Author links open overlay panelJean MarieBlanc1BernardChevassus2 1986.                                                                                                                                       | High      |
| 31                              | 6.04 | Is the taxon likely to be hermaphroditic or to display asexual reproduction?                                                                                                 | No        | <a href="https://www.cabi.org/isc/datasheet/65327#todistributionDatabase">https://www.cabi.org/isc/datasheet/65327#todistributionDatabase</a>                                                                                                                                                                                           | Very high |
| 32                              | 6.05 | Is the taxon dependent on the presence of another taxon (or specific habitat features) to complete its life cycle?                                                           | No        | <a href="https://www.fishbase.se/summary/Salvelinus-namaycush.html">https://www.fishbase.se/summary/Salvelinus-namaycush.html</a>                                                                                                                                                                                                       | Very high |
| 33                              | 6.06 | Is the taxon known (or likely) to produce a large number of propagules or offspring within a short time span (e.g. < 1 year)?                                                | Yes       | Kottelat, M. and J. Freyhof, 2007. Handbook of European freshwater fishes. Publications Kottelat, Cornol and Freyhof, Berlin. 646 pp                                                                                                                                                                                                    | Very high |
| 34                              | 6.07 | How many time units (days, months, years) does the taxon require to reach the age-at-first-reproduction?                                                                     | 6         | Kottelat, M. and J. Freyhof, 2007. Handbook of European freshwater fishes. Publications Kottelat, Cornol and Freyhof, Berlin. 646 pp                                                                                                                                                                                                    | Very high |
| <b>7. Dispersal mechanisms</b>  |      |                                                                                                                                                                              |           |                                                                                                                                                                                                                                                                                                                                         |           |
| 35                              | 7.01 | How many potential internal vectors/pathways could the taxon use to disperse within the RA area (with suitable protected areas (e.g. MCZ, MPA, SSSI)?                        | One       | <a href="https://www.cabi.org/isc/datasheet/65327#toriskOfIntroduction">https://www.cabi.org/isc/datasheet/65327#toriskOfIntroduction</a>                                                                                                                                                                                               | High      |
| 36                              | 7.02 | Will any of these vectors/pathways bring the taxon in close proximity to one or more protected areas (e.g. MCZ, MPA, SSSI)?                                                  | Yes       | Depends on stocking activities                                                                                                                                                                                                                                                                                                          | Very high |
| 37                              | 7.03 | Does the taxon have a means of actively attaching itself to hard substrata (e.g. ship hulls, pilings, buoys) such that it enhances the likelihood of dispersal?              | No        | Kottelat, M. and J. Freyhof, 2007. Handbook of European freshwater fishes. Publications Kottelat, Cornol and Freyhof, Berlin. 646 pp                                                                                                                                                                                                    | Very high |
| 38                              | 7.04 | Is natural dispersal of the taxon likely to occur as eggs (for animals) or as propagules (for plants: seeds, spores) in the RA area?                                         | No        | Kottelat, M. and J. Freyhof, 2007. Handbook of European freshwater fishes. Publications Kottelat, Cornol and Freyhof, Berlin. 646 pp                                                                                                                                                                                                    | Very high |
| 39                              | 7.05 | Is natural dispersal of the taxon likely to occur as larvae/juveniles (for animals) or as fragments/seedlings (for plants) in the RA area?                                   | Yes       | Kottelat, M. and J. Freyhof, 2007. Handbook of European freshwater fishes. Publications Kottelat, Cornol and Freyhof, Berlin. 646 pp                                                                                                                                                                                                    | Medium    |
| 40                              | 7.06 | Are older life stages of the taxon likely to migrate in the RA area for reproduction?                                                                                        | Yes       | Kottelat, M. and J. Freyhof, 2007. Handbook of European freshwater fishes. Publications Kottelat, Cornol and Freyhof, Berlin. 646 pp                                                                                                                                                                                                    | High      |
| 41                              | 7.07 | Are propagules or eggs of the taxon likely to be dispersed in the RA area by other animals?                                                                                  | No        | <a href="https://www.cabi.org/isc/datasheet/65327#toriskOfIntroduction">https://www.cabi.org/isc/datasheet/65327#toriskOfIntroduction</a>                                                                                                                                                                                               | Very high |
| 42                              | 7.08 | Is dispersal of the taxon along any of the vectors/pathways mentioned in the previous seven questions (35–41; i.e. both unintentional or intentional) likely to be           | No        | <a href="https://www.cabi.org/isc/datasheet/65325#tohistoryOfIntroduction">https://www.cabi.org/isc/datasheet/65325#tohistoryOfIntroduction</a>                                                                                                                                                                                         | Very high |
| 43                              | 7.09 | Is dispersal of the taxon density dependent?                                                                                                                                 | No        | Effectiveness of lake trout ( <i>Salvelinus namaycush</i> ) suppression in Lake Pend Oreille, Idaho: 2006–2016 Andrew M. Dux, Michael J. Hansen, Matthew P. Corsi, Nicholas C. Wahl, James P. Fredericks, Charles E. Corsi, Daniel J. Schill & Ned J. Horner. 2019                                                                      | Very high |
| <b>8. Tolerance attributes</b>  |      |                                                                                                                                                                              |           |                                                                                                                                                                                                                                                                                                                                         |           |
| 44                              | 8.01 | Is the taxon able to withstand being out of water for extended periods (e.g. minimum of one or more hours) at some stage of its life cycle?                                  | No        | Importance of rearing-unit design and stocking density to the behavior, growth and metabolism of lake trout ( <i>Salvelinus namaycush</i> ) Author links open overlay panelRobert MRossaBarnaby JWatten. 1998                                                                                                                           | Very high |
| 45                              | 8.02 | Is the taxon tolerant of a wide range of water quality conditions relevant to that taxon? [In the Justification field, indicate the relevant water quality variable(s) being | No        | Acute and chronic toxicity of nitrate to early life stages of lake trout ( <i>Salvelinus namaycush</i> ) and lake whitefish ( <i>Coregonus clupeaformis</i> ) Michael D. McGurk, François Landry, Armando Tang, Chris C. Hanks Nitrate                                                                                                  | Very high |
| 46                              | 8.03 | Can the taxon be controlled or eradicated in the wild with chemical, biological, or other agents/means?                                                                      | No        | <a href="https://www.cabi.org/isc/datasheet/65327#topreventionAndControl">https://www.cabi.org/isc/datasheet/65327#topreventionAndControl</a>                                                                                                                                                                                           | Very high |
| 47                              | 8.04 | Is the taxon likely to tolerate or benefit from environmental/human disturbance?                                                                                             | No        | <a href="https://www.cabi.org/isc/datasheet/65327#toriskAndImpactFactors">https://www.cabi.org/isc/datasheet/65327#toriskAndImpactFactors</a>                                                                                                                                                                                           | Very high |
| 48                              | 8.05 | Is the taxon able to tolerate salinity levels that are higher or lower than those found in its usual environment?                                                            | Yes       | Variation in salinity tolerance, gill Na <sup>+</sup> /K <sup>+</sup> -ATPase, Na <sup>+</sup> /K <sup>+</sup> /2Cl <sup>-</sup> cotransporter and mitochondria-rich cell distribution in three salmonids <i>Salvelinus namaycush</i> , <i>Salvelinus fontinalis</i> and <i>Salmo salar</i> Junya Hiroi* and Stephen D. McCormick. 2007 | High      |
| 49                              | 8.06 | Are there effective natural enemies (predators) of the taxon present in the RA                                                                                               | Yes       | <a href="https://www.cabi.org/isc/datasheet/65327#tonaturalEnemies">https://www.cabi.org/isc/datasheet/65327#tonaturalEnemies</a>                                                                                                                                                                                                       | High      |
| <b>C. Climate change</b>        |      |                                                                                                                                                                              |           |                                                                                                                                                                                                                                                                                                                                         |           |
| <b>9. Climate change</b>        |      |                                                                                                                                                                              |           |                                                                                                                                                                                                                                                                                                                                         |           |
| 50                              | 9.01 | Under the predicted future climatic conditions, are the risks of entry into the RA area posed by the taxon likely to increase, decrease or not change?                       | No change | <a href="https://www.cabi.org/isc/datasheet/65327#toriskAndImpactFactors">https://www.cabi.org/isc/datasheet/65327#toriskAndImpactFactors</a>                                                                                                                                                                                           | Very high |
| 51                              | 9.02 | Under the predicted future climatic conditions, are the risks of establishment posed by the taxon likely to increase, decrease or not change?                                | Decrease  | Non-native fishes and climate change: predicting species responses to warming temperatures in a temperate region J. R. BRITTON*, J. CUCHEROUSSET*, G. D. DAVIES*, †, M. J. GODARD‡ AND G. H. COPP* 2010                                                                                                                                 | Very high |

|    |      |                                                                                                                                                              |           |                                                                                                                                                                                                         |        |
|----|------|--------------------------------------------------------------------------------------------------------------------------------------------------------------|-----------|---------------------------------------------------------------------------------------------------------------------------------------------------------------------------------------------------------|--------|
| 52 | 9.03 | Under the predicted future climatic conditions, are the risks of dispersal within the RA area posed by the taxon likely to increase, decrease or not change? | Decrease  | Non-native fishes and climate change: predicting species responses to warming temperatures in a temperate region J. R. BRITTON*, J. CUCHEROUSSET*, G. D. DAVIES*, †, M. J. GODARD‡ AND G. H. COPP* 2010 | High   |
| 53 | 9.04 | Under the predicted future climatic conditions, what is the likely magnitude of future potential impacts on biodiversity and/or ecological integrity/status? | No change | Non-native fishes and climate change: predicting species responses to warming temperatures in a temperate region J. R. BRITTON*, J. CUCHEROUSSET*, G. D. DAVIES*, †, M. J. GODARD‡ AND G. H. COPP* 2010 | Medium |
| 54 | 9.05 | Under the predicted future climatic conditions, what is the likely magnitude of future potential impacts on ecosystem structure and/or function?             | Lower     | Non-native fishes and climate change: predicting species responses to warming temperatures in a temperate region J. R. BRITTON*, J. CUCHEROUSSET*, G. D. DAVIES*, †, M. J. GODARD‡ AND G. H. COPP* 2010 | High   |
| 55 | 9.06 | Under the predicted future climatic conditions, what is the likely magnitude of future potential impacts on ecosystem services/socio-economic factors?       | No change | Non-native fishes and climate change: predicting species responses to warming temperatures in a temperate region J. R. BRITTON*, J. CUCHEROUSSET*, G. D. DAVIES*, †, M. J. GODARD‡ AND G. H. COPP* 2010 | High   |

| Statistics                                     |      |
|------------------------------------------------|------|
| Scores                                         |      |
| BRA                                            | 30.5 |
| BRA Outcome                                    | -    |
| BRA+CCA                                        | 24.5 |
| BRA+CCA Outcome                                | -    |
| Score partition                                |      |
| A. Biogeography/Historical                     | 14.5 |
| 1. Domestication/Cultivation                   | 4.0  |
| 2. Climate, distribution and introduction risk | 0.0  |
| 3. Invasive elsewhere                          | 10.5 |
| B. Biology/Ecology                             | 16.0 |
| 4. Undesirable (or persistence) traits         | 7.0  |
| 5. Resource exploitation                       | 7.0  |
| 6. Reproduction                                | 3.0  |
| 7. Dispersal mechanisms                        | 0.0  |
| 8. Tolerance attributes                        | -1.0 |
| C. Climate change                              | -6.0 |
| 9. Climate change                              | -6.0 |
| Answered Questions                             |      |
| Total                                          | 55   |
| A. Biogeography/Historical                     | 13   |
| 1. Domestication/Cultivation                   | 3    |
| 2. Climate, distribution and introduction risk | 5    |
| 3. Invasive elsewhere                          | 5    |
| B. Biology/Ecology                             | 36   |
| 4. Undesirable (or persistence) traits         | 12   |
| 5. Resource exploitation                       | 2    |
| 6. Reproduction                                | 7    |
| 7. Dispersal mechanisms                        | 9    |
| 8. Tolerance attributes                        | 6    |
| C. Climate change                              | 6    |
| 9. Climate change                              | 6    |
| Sectors affected                               |      |
| Commercial                                     | 9    |
| Environmental                                  | 9    |
| Species or population nuisance traits          | 8    |

| Thresholds |      |
|------------|------|
| BRA        | -    |
| BRA+CCA    | -    |
| Confidence |      |
| BRA+CCA    | 0.85 |
| BRA        | 0.86 |
| CCA        | 0.79 |

| Date and Time       |
|---------------------|
| 24/05/2021 11:11:40 |

## AS-ISK v2

| Taxon and Assessor details         |                                         |
|------------------------------------|-----------------------------------------|
| Category                           | Fishes and Lampreys (freshwater)        |
| Taxon name                         | <i>Salvelinus namaycush</i>             |
| Common name                        | lake charr                              |
| Assessor                           | Ivan Špelić                             |
| Risk screening context             |                                         |
| Reason and socio-economic benefits |                                         |
| Risk assessment area               | Danube & Adriatic basins BA, HR, ME, RS |
| Taxonomy                           |                                         |
| Native range                       |                                         |
| Introduced range                   |                                         |
| URL                                |                                         |

|                                                |      | Response                                                                                                                                                                | Justification (references and/or other information) | Confidence                                                                                                                                                                                                                                                                                                                                                                                                                                                                                                                                                                                                              |           |
|------------------------------------------------|------|-------------------------------------------------------------------------------------------------------------------------------------------------------------------------|-----------------------------------------------------|-------------------------------------------------------------------------------------------------------------------------------------------------------------------------------------------------------------------------------------------------------------------------------------------------------------------------------------------------------------------------------------------------------------------------------------------------------------------------------------------------------------------------------------------------------------------------------------------------------------------------|-----------|
| A. Biogeography/Historical                     |      |                                                                                                                                                                         |                                                     |                                                                                                                                                                                                                                                                                                                                                                                                                                                                                                                                                                                                                         |           |
| 1. Domestication/Cultivation                   |      |                                                                                                                                                                         |                                                     |                                                                                                                                                                                                                                                                                                                                                                                                                                                                                                                                                                                                                         |           |
| 1                                              | 1.01 | Has the taxon been the subject of domestication (or cultivation) for at least 20 generations?                                                                           | Yes                                                 | Ackefors, H. (1982). Aquaculture: A New Industry in Sweden. <i>Ambio</i> , 11(6), 362-365. Retrieved April 22, 2020, from <a href="http://www.jstor.org/stable/4312841">www.jstor.org/stable/4312841</a>                                                                                                                                                                                                                                                                                                                                                                                                                | High      |
| 2                                              | 1.02 | Is the taxon harvested in the wild and likely to be sold or used in its live form?                                                                                      | Yes                                                 | Morissette, O. , Sirois, P. , Lester, N. P. , Wilson, C. C. , & Bernatchez, L. (2018). Supplementation stocking of Lake Trout ( <i>Salvelinus namaycush</i> ) in small boreal lakes: Ecotypes influence on growth and condition. <i>PLoS ONE</i> , 13, e0200599                                                                                                                                                                                                                                                                                                                                                         | High      |
| 3                                              | 1.03 | Does the taxon have invasive races, varieties, sub-taxa or congeners?                                                                                                   | Yes                                                 | <i>Salvelinus fontinalis</i>                                                                                                                                                                                                                                                                                                                                                                                                                                                                                                                                                                                            | High      |
| 2. Climate, distribution and introduction risk |      |                                                                                                                                                                         |                                                     |                                                                                                                                                                                                                                                                                                                                                                                                                                                                                                                                                                                                                         |           |
| 4                                              | 2.01 | How similar are the climatic conditions of the Risk Assessment (RA) area and the taxon's native range?                                                                  | High                                                | Climatch 2020                                                                                                                                                                                                                                                                                                                                                                                                                                                                                                                                                                                                           | Medium    |
| 5                                              | 2.02 | What is the quality of the climate matching data?                                                                                                                       | Medium                                              | Climatch 2020                                                                                                                                                                                                                                                                                                                                                                                                                                                                                                                                                                                                           | High      |
| 6                                              | 2.03 | Is the taxon already present outside of captivity in the RA area?                                                                                                       | No                                                  | Povž et al. 2018                                                                                                                                                                                                                                                                                                                                                                                                                                                                                                                                                                                                        | High      |
| 7                                              | 2.04 | How many potential vectors could the taxon use to enter in the RA area?                                                                                                 | One                                                 | Introduction for angling (CABI 2019).                                                                                                                                                                                                                                                                                                                                                                                                                                                                                                                                                                                   | Medium    |
| 8                                              | 2.05 | Is the taxon currently found in close proximity to, and likely to enter into, the RA area in the near future (e.g. unintentional and intentional introductions)?        | Yes                                                 | Austria, Italy (Froese & Pauly 2020).                                                                                                                                                                                                                                                                                                                                                                                                                                                                                                                                                                                   | Medium    |
| 3. Invasive elsewhere                          |      |                                                                                                                                                                         |                                                     |                                                                                                                                                                                                                                                                                                                                                                                                                                                                                                                                                                                                                         |           |
| 9                                              | 3.01 | Has the taxon become naturalised (established viable populations) outside its                                                                                           | Yes                                                 | CABI 2019, Froese & Pauly 2020                                                                                                                                                                                                                                                                                                                                                                                                                                                                                                                                                                                          | Very high |
| 10                                             | 3.02 | In the taxon's introduced range, are there known adverse impacts to wild stocks or commercial taxa?                                                                     | Yes                                                 | Global Invasive Species Database (2020) Species profile: <i>Salvelinus namaycush</i> . Downloaded from <a href="http://www.iucnqisd.org/qisd/species.php?sc=1363">http://www.iucnqisd.org/qisd/species.php?sc=1363</a> on 22-04-                                                                                                                                                                                                                                                                                                                                                                                        | High      |
| 11                                             | 3.03 | In the taxon's introduced range, are there known adverse impacts to aquaculture?                                                                                        | No                                                  | Rarely used in aquaculture (Fisheries and Aquaculture Department. Introduced Species Fact Sheets. In: FAO Fisheries and Aquaculture Department [online]. Rome. Updated 17 March 2017. [Cited 22 April 2020]), no documented impacts.                                                                                                                                                                                                                                                                                                                                                                                    | Medium    |
| 12                                             | 3.04 | In the taxon's introduced range, are there known adverse impacts to ecosystem services?                                                                                 | Yes                                                 | Pam Fuller, and Matt Neilson, 2020, <i>Salvelinus namaycush</i> (Walbaum in Artedi, 1792): U.S. Geological Survey, Nonindigenous Aquatic Species Database, Gainesville, FL, <a href="https://nas.er.usgs.gov/queries/FactSheet.aspx?SpeciesID=942">https://nas.er.usgs.gov/queries/FactSheet.aspx?SpeciesID=942</a> , Revision Date: 11/12/2019, Peer Review Date: 2/2/2016, Access Date: 4/22/2020                                                                                                                                                                                                                     | High      |
| 13                                             | 3.05 | In the taxon's introduced range, are there known adverse socio-economic impacts?                                                                                        | Yes                                                 | Pam Fuller, and Matt Neilson, 2020, <i>Salvelinus namaycush</i> (Walbaum in Artedi, 1792): U.S. Geological Survey, Nonindigenous Aquatic Species Database, Gainesville, FL, <a href="https://nas.er.usgs.gov/queries/FactSheet.aspx?SpeciesID=942">https://nas.er.usgs.gov/queries/FactSheet.aspx?SpeciesID=942</a> , Revision Date: 11/12/2019, Peer Review Date: 2/2/2016, Access Date: 4/22/2020                                                                                                                                                                                                                     | Medium    |
| B. Biology/Ecology                             |      |                                                                                                                                                                         |                                                     |                                                                                                                                                                                                                                                                                                                                                                                                                                                                                                                                                                                                                         |           |
| 4. Undesirable (or persistence) traits         |      |                                                                                                                                                                         |                                                     |                                                                                                                                                                                                                                                                                                                                                                                                                                                                                                                                                                                                                         |           |
| 14                                             | 4.01 | Is it likely that the taxon will be poisonous or pose other risks to human health?                                                                                      | No                                                  | Harmless (Froese & Pauly 2020).                                                                                                                                                                                                                                                                                                                                                                                                                                                                                                                                                                                         | Very high |
| 15                                             | 4.02 | Is it likely that the taxon will smother one or more native taxa (that are not threatened or protected)?                                                                | Yes                                                 | Pam Fuller, and Matt Neilson, 2020, <i>Salvelinus namaycush</i> (Walbaum in Artedi, 1792): U.S. Geological Survey, Nonindigenous Aquatic Species Database, Gainesville, FL, <a href="https://nas.er.usgs.gov/queries/FactSheet.aspx?SpeciesID=942">https://nas.er.usgs.gov/queries/FactSheet.aspx?SpeciesID=942</a> , Revision Date: 11/12/2019, Peer Review Date: 2/2/2016, Access Date: 4/22/2020                                                                                                                                                                                                                     | High      |
| 16                                             | 4.03 | Are there any threatened or protected taxa that the non-native taxon would parasitise in the RA area?                                                                   | No                                                  | No parasitic behaviour.                                                                                                                                                                                                                                                                                                                                                                                                                                                                                                                                                                                                 | Very high |
| 17                                             | 4.04 | Is the taxon adaptable in terms of climatic and other environmental conditions, thus enhancing its potential persistence if it has invaded or could invade the RA area? | No                                                  | Lake trout are a cold-water species requiring relatively high concentrations of dissolved oxygen for survival. Lake trout are the only major native sport fish adapted to the deep, cold water of oligotrophic (low-nutrient) lakes. At the southern range of the species, lake trout require deep water refugia, where preferred temperature ranges and oxygen levels exist (Lenart, S. 2001. "Salvelinus namaycush" (On-line), Animal Diversity Web. Accessed April 22, 2020 at <a href="https://animaldiversity.org/accounts/Salvelinus_namaycush/">https://animaldiversity.org/accounts/Salvelinus_namaycush/</a> ) | Very high |

|                                 |      |                                                                                                                                                                 |                |                                                                                                                                                                                                                                                                                                                                                                                                                                                                                                                                                                                                                                                                              |           |
|---------------------------------|------|-----------------------------------------------------------------------------------------------------------------------------------------------------------------|----------------|------------------------------------------------------------------------------------------------------------------------------------------------------------------------------------------------------------------------------------------------------------------------------------------------------------------------------------------------------------------------------------------------------------------------------------------------------------------------------------------------------------------------------------------------------------------------------------------------------------------------------------------------------------------------------|-----------|
| 18                              | 4.05 | Is the taxon likely to disrupt food-web structure/function in aquatic ecosystems if it has invaded or is likely to invade the RA area?                          | No             | Only established in few lakes in Europe (some Alpine and Scandinavian lakes); adverse impact of this type only documented in North America, not in Europe. Crossman, E. J. (1995). Introduction of the Lake Trout ( <i>Salvelinus namaycush</i> ) in Areas Outside its Native Distribution: A Review. <i>Journal of Great Lakes Research</i> , 21, 17–29. doi:10.1016/s0380-1330(95)71081-4. Eloranta, A. P., Nieminen, P., & Kahilainen, K. K. (2014). Trophic interactions between introduced lake trout ( <i>Salvelinus namaycush</i> ) and native Arctic charr ( <i>S. alpinus</i> ) in a large Fennoscandian subarctic lake. <i>Ecology of Freshwater Fish</i> , 24(2). | Medium    |
| 19                              | 4.06 | Is the taxon likely to exert adverse impacts on ecosystem services in the RA area?                                                                              | No             | Only established in few lakes in Europe (some Alpine and Scandinavian lakes); adverse impact of this type only documented in North America, not in Europe. Crossman, E. J. (1995). Introduction of the Lake Trout ( <i>Salvelinus namaycush</i> ) in Areas Outside its Native Distribution: A Review. <i>Journal of Great Lakes Research</i> , 21, 17–29. doi:10.1016/s0380-1330(95)71081-4. Eloranta, A. P., Nieminen, P., & Kahilainen, K. K. (2014). Trophic interactions between introduced lake trout ( <i>Salvelinus namaycush</i> ) and native Arctic charr ( <i>S. alpinus</i> ) in a large Fennoscandian subarctic lake. <i>Ecology of Freshwater Fish</i> , 24(2). | Medium    |
| 20                              | 4.07 | Is it likely that the taxon will host, and/or act as a vector for, recognised pests and infectious agents that are endemic in the RA                            | Yes            | Froese & Pauly 2020                                                                                                                                                                                                                                                                                                                                                                                                                                                                                                                                                                                                                                                          | High      |
| 21                              | 4.08 | Is it likely that the taxon will host, and/or act as a vector for, recognised pests and infectious agents that are absent from (novel to) the RA area?          | Yes            | Froese & Pauly 2020                                                                                                                                                                                                                                                                                                                                                                                                                                                                                                                                                                                                                                                          | High      |
| 22                              | 4.09 | Is it likely that the taxon will achieve a body size that will make it more likely to be released from captivity?                                               | Yes            | 150 cm, 32 kg (Froese & Pauly 2020).                                                                                                                                                                                                                                                                                                                                                                                                                                                                                                                                                                                                                                         | Very high |
| 23                              | 4.10 | Is the taxon capable of sustaining itself in a range of water velocity conditions (e.g. versatile in habitat use)?                                              | Yes            | Occurs in shallow and deep waters of northern lakes and streams (Froese & Pauly 2020).                                                                                                                                                                                                                                                                                                                                                                                                                                                                                                                                                                                       | High      |
| 24                              | 4.11 | Is it likely that the taxon's mode of existence (e.g. excretion of by-products) or behaviours (e.g. feeding) will reduce habitat quality for native taxa?       | No             | Not documented in literature.                                                                                                                                                                                                                                                                                                                                                                                                                                                                                                                                                                                                                                                | High      |
| 25                              | 4.12 | Is the taxon likely to maintain a viable population even when present in low densities (or persisting in adverse conditions by way of a dormant form)?          | No             | Not documented.                                                                                                                                                                                                                                                                                                                                                                                                                                                                                                                                                                                                                                                              | Medium    |
| <b>5. Resource exploitation</b> |      |                                                                                                                                                                 |                |                                                                                                                                                                                                                                                                                                                                                                                                                                                                                                                                                                                                                                                                              |           |
| 26                              | 5.01 | Is the taxon likely to consume threatened or protected native taxa in the RA area?                                                                              | Yes            | Feeds on plankton, insects and fishes (Kottelat & Freyhof 2008).                                                                                                                                                                                                                                                                                                                                                                                                                                                                                                                                                                                                             | Very high |
| 27                              | 5.02 | Is the taxon likely to sequester food resources (including nutrients) to the detriment of native taxa in the RA area?                                           | Not applicable | No data for calculation.                                                                                                                                                                                                                                                                                                                                                                                                                                                                                                                                                                                                                                                     | Very high |
| <b>6. Reproduction</b>          |      |                                                                                                                                                                 |                |                                                                                                                                                                                                                                                                                                                                                                                                                                                                                                                                                                                                                                                                              |           |
| 28                              | 6.01 | Is the taxon likely to exhibit parental care and/or to reduce age-at-maturity in response to environmental conditions?                                          | Yes            | Research has indicated that environmental factors, such as lake size and dissolved solid concentrations, may play a role in the age of first maturity and overall reproductive success of the lake trout (Lenart, S. 2001. "Salvelinus namaycush" (On-line), Animal Diversity Web. Accessed April 22, 2020 at <a href="https://animaldiversity.org/accounts/Salvelinus_namaycush/">https://animaldiversity.org/accounts/Salvelinus_namaycush/</a> ).                                                                                                                                                                                                                         | High      |
| 29                              | 6.02 | Is the taxon likely to produce viable gametes or propagules (in the RA area)?                                                                                   | No             | Established in some high altitude lakes in Pyrenees, north Italy and Scandinavia. In lakes of Alps (France, Switzerland) apparently survives only by stocking (Kottelat & Freyhof 2008).                                                                                                                                                                                                                                                                                                                                                                                                                                                                                     | Medium    |
| 30                              | 6.03 | Is the taxon likely to hybridise naturally with native taxa?                                                                                                    | No             | No related species in RA area (Kottelat & Freyhof 2008).                                                                                                                                                                                                                                                                                                                                                                                                                                                                                                                                                                                                                     | Very high |
| 31                              | 6.04 | Is the taxon likely to be hermaphroditic or to display asexual reproduction?                                                                                    | No             | Froese & Pauly 2020                                                                                                                                                                                                                                                                                                                                                                                                                                                                                                                                                                                                                                                          | Very high |
| 32                              | 6.05 | Is the taxon dependent on the presence of another taxon (or specific habitat features) to complete its life cycle?                                              | Yes            | David T. Callaghan, Paul J. Blanchfield, Peter A. Cott (2016): Lake trout ( <i>Salvelinus namaycush</i> ) spawning habitat in a northern lake: The role of wind and physical characteristics on habitat quality. <i>Journal of Great Lakes Research</i> , Volume 42, Issue 2, 2016, Pages                                                                                                                                                                                                                                                                                                                                                                                    | High      |
| 33                              | 6.06 | Is the taxon known (or likely) to produce a large number of propagules or offspring within a short time span (e.g. < 1 year)?                                   | Yes            | 18000 eggs per female (Froese & Pauly 2020). Sometimes they don't spawn every year to conserve energy (David T. Callaghan, Paul J. Blanchfield, Peter A. Cott, Lake trout ( <i>Salvelinus namaycush</i> ) spawning habitat in a northern lake: The role of wind and physical characteristics on habitat quality. <i>Journal of Great Lakes Research</i> , Volume 42, Issue 2, 2016, Pages 299-307).                                                                                                                                                                                                                                                                          | Medium    |
| 34                              | 6.07 | How many time units (days, months, years) does the taxon require to reach the age-at-first-reproduction?                                                        | 3              | 3 years is minimum, mostly between 5 and 7 (Froese & Pauly 2020).                                                                                                                                                                                                                                                                                                                                                                                                                                                                                                                                                                                                            | Low       |
| <b>7. Dispersal mechanisms</b>  |      |                                                                                                                                                                 |                |                                                                                                                                                                                                                                                                                                                                                                                                                                                                                                                                                                                                                                                                              |           |
| 35                              | 7.01 | How many potential internal vectors/pathways could the taxon use to disperse within the RA area (with suitable                                                  | One            | Introductions for angling, no spawning in wild is expected (personal opinion).                                                                                                                                                                                                                                                                                                                                                                                                                                                                                                                                                                                               | Medium    |
| 36                              | 7.02 | Will any of these vectors/pathways bring the taxon in close proximity to one or more protected areas (e.g. MCZ, MPA, SSSI)?                                     | No             | Personal opinion.                                                                                                                                                                                                                                                                                                                                                                                                                                                                                                                                                                                                                                                            | Low       |
| 37                              | 7.03 | Does the taxon have a means of actively attaching itself to hard substrata (e.g. ship hulls, pilings, buoys) such that it enhances the likelihood of dispersal? | No             | No adaptations.                                                                                                                                                                                                                                                                                                                                                                                                                                                                                                                                                                                                                                                              | Very high |
| 38                              | 7.04 | Is natural dispersal of the taxon likely to occur as eggs (for animals) or as propagules (for plants: seeds, spores) in the RA area?                            | No             | Probably no possible reproduction in RA area, even if introduced to adequate habitats similar to Alpine lakes in Switzerland and France (Kottelat & Freyhof 2008).                                                                                                                                                                                                                                                                                                                                                                                                                                                                                                           | Medium    |

|                                |      |                                                                                                                                                                                           |                |                                                                                                                                                                                                                                                                                                                                                                                                                                                                                                                                                               |           |
|--------------------------------|------|-------------------------------------------------------------------------------------------------------------------------------------------------------------------------------------------|----------------|---------------------------------------------------------------------------------------------------------------------------------------------------------------------------------------------------------------------------------------------------------------------------------------------------------------------------------------------------------------------------------------------------------------------------------------------------------------------------------------------------------------------------------------------------------------|-----------|
| 39                             | 7.05 | Is natural dispersal of the taxon likely to occur as larvae/juveniles (for animals) or as fragments/seedlings (for plants) in the RA area?                                                | No             | Probably no possible reproduction in RA area, even if introduced to adequate habitats similar to Alpine lakes in Switzerland and France (Kottelat & Freyhof 2008).                                                                                                                                                                                                                                                                                                                                                                                            | Medium    |
| 40                             | 7.06 | Are older life stages of the taxon likely to migrate in the RA area for reproduction?                                                                                                     | No             | Probably no possible reproduction in RA area, even if introduced to adequate habitats similar to Alpine lakes in Switzerland and France (Kottelat & Freyhof 2008).                                                                                                                                                                                                                                                                                                                                                                                            | Medium    |
| 41                             | 7.07 | Are propagules or eggs of the taxon likely to be dispersed in the RA area by other animals?                                                                                               | No             | Probably no possible reproduction in RA area, even if introduced to adequate habitats similar to Alpine lakes in Switzerland and France (Kottelat & Freyhof 2008).                                                                                                                                                                                                                                                                                                                                                                                            | High      |
| 42                             | 7.08 | Is dispersal of the taxon along any of the vectors/pathways mentioned in the previous seven questions (35–41; i.e. both unintentional or intentional) likely to be                        | Yes            | Introduction for angling.                                                                                                                                                                                                                                                                                                                                                                                                                                                                                                                                     | Very high |
| 43                             | 7.09 | Is dispersal of the taxon density dependent?                                                                                                                                              | No             | Not documented in literature.                                                                                                                                                                                                                                                                                                                                                                                                                                                                                                                                 | Medium    |
| <b>8. Tolerance attributes</b> |      |                                                                                                                                                                                           |                |                                                                                                                                                                                                                                                                                                                                                                                                                                                                                                                                                               |           |
| 44                             | 8.01 | Is the taxon able to withstand being out of water for extended periods (e.g. minimum of one or more hours) at some stage of its life cycle?                                               | No             | Sensitive species, not tolerant to low oxygen levels (Lenart, S. 2001. "Salvelinus namaycush" (On-line), Animal Diversity Web. Accessed April 22, 2020 at <a href="https://animaldiversity.org/accounts/Salvelinus_namaycush/">https://animaldiversity.org/accounts/Salvelinus_namaycush/</a> ).                                                                                                                                                                                                                                                              | Very high |
| 45                             | 8.02 | Is the taxon tolerant of a wide range of water quality conditions relevant to that taxon? [In the Justification field, indicate the relevant water quality variable(s) being considered.] | No             | Needs cold water (below 13 deg Celsius) and high concentration of dissolved oxygen (Global Invasive Species Database (2020) Species profile: Salvelinus namaycush. Downloaded from <a href="http://www.iucngisd.org/gisd/species.php?sc=1363">http://www.iucngisd.org/gisd/species.php?sc=1363</a> on 22-04-2020.; Lenart, S. 2001. "Salvelinus namaycush" (On-line), Animal Diversity Web. Accessed April 22, 2020 at <a href="https://animaldiversity.org/accounts/Salvelinus_namaycush/">https://animaldiversity.org/accounts/Salvelinus_namaycush/</a> ). | Very high |
| 46                             | 8.03 | Can the taxon be controlled or eradicated in the wild with chemical, biological, or other agents/means?                                                                                   | Not applicable | Not allowed in Slovenia.                                                                                                                                                                                                                                                                                                                                                                                                                                                                                                                                      | Very high |
| 47                             | 8.04 | Is the taxon likely to tolerate or benefit from environmental/human disturbance?                                                                                                          | Yes            | Can survive in reservoirs if conditions are met (Pam Fuller, and Matt Neilson, 2020, Salvelinus namaycush (Walbaum in Artdi, 1792): U.S. Geological Survey, Nonindigenous Aquatic Species Database, Gainesville, FL, <a href="https://nas.er.usgs.gov/queries/FactSheet.aspx?SpeciesID=942">https://nas.er.usgs.gov/queries/FactSheet.aspx?SpeciesID=942</a> , Revision Date: 11/12/2019, Peer Review Date: 2/2/2016, Access Date: 4/22/2020).                                                                                                                | High      |
| 48                             | 8.05 | Is the taxon able to tolerate salinity levels that are higher or lower than those found in its usual environment?                                                                         | No             | Muir, A.M., Hansen, M.J., Bronte, C.R. and Krueger, C.C. (2016), If Arctic charr Salvelinus alpinus is 'the most diverse vertebrate', what is the lake charr Salvelinus namaycush?. Fish Fish, 17: 1194-1207. doi:10.1111/faf.12114                                                                                                                                                                                                                                                                                                                           | High      |
| 49                             | 8.06 | Are there effective natural enemies (predators) of the taxon present in the RA                                                                                                            | Yes            | Otters, piscivorous birds, maybe piscivorous fish if present in the habitat (personal opinion).                                                                                                                                                                                                                                                                                                                                                                                                                                                               | Medium    |
| <b>C. Climate change</b>       |      |                                                                                                                                                                                           |                |                                                                                                                                                                                                                                                                                                                                                                                                                                                                                                                                                               |           |
| <b>9. Climate change</b>       |      |                                                                                                                                                                                           |                |                                                                                                                                                                                                                                                                                                                                                                                                                                                                                                                                                               |           |
| 50                             | 9.01 | Under the predicted future climatic conditions, are the risks of entry into the RA area posed by the taxon likely to increase, decrease or not change?                                    | No change      | Only path is introduction my man so no change expected.                                                                                                                                                                                                                                                                                                                                                                                                                                                                                                       | High      |
| 51                             | 9.02 | Under the predicted future climatic conditions, are the risks of establishment posed by the taxon likely to increase, decrease or not change?                                             | Decrease       | Needs temperatures under 13 degrees Celsius and high oxygen levels, those habitats will decrease (COMTE, L., BUISSON, L., DAUFRESNE, M. and GRENOUILLET, G. (2013), Climate-induced changes in the distribution of freshwater fish: observed and predicted trends. Freshwater Biology, 58: 625-639.                                                                                                                                                                                                                                                           | Medium    |
| 52                             | 9.03 | Under the predicted future climatic conditions, are the risks of dispersal within the RA area posed by the taxon likely to increase, decrease or not change?                              | Decrease       | Needs temperatures under 13 degrees Celsius and high oxygen levels, those habitats will decrease (COMTE, L., BUISSON, L., DAUFRESNE, M. and GRENOUILLET, G. (2013), Climate-induced changes in the distribution of freshwater fish: observed and predicted trends. Freshwater Biology, 58: 625-639.                                                                                                                                                                                                                                                           | Medium    |
| 53                             | 9.04 | Under the predicted future climatic conditions, what is the likely magnitude of future potential impacts on biodiversity and/or ecological integrity/status?                              | Lower          | Lower impact i unfavourable conditions for cold-water species (COMTE, L., BUISSON, L., DAUFRESNE, M. and GRENOUILLET, G. (2013), Climate-induced changes in the distribution of freshwater fish: observed and predicted trends. Freshwater Biology, 58: 625-639. <a href="https://doi.org/10.1111/fwb.12081">https://doi.org/10.1111/fwb.12081</a> ).                                                                                                                                                                                                         | Low       |
| 54                             | 9.05 | Under the predicted future climatic conditions, what is the likely magnitude of future potential impacts on ecosystem structure and/or function?                                          | Lower          | Lower impact i unfavourable conditions for cold-water species (COMTE, L., BUISSON, L., DAUFRESNE, M. and GRENOUILLET, G. (2013), Climate-induced changes in the distribution of freshwater fish: observed and predicted trends. Freshwater Biology, 58: 625-639. <a href="https://doi.org/10.1111/fwb.12081">https://doi.org/10.1111/fwb.12081</a> ).                                                                                                                                                                                                         | Low       |
| 55                             | 9.06 | Under the predicted future climatic conditions, what is the likely magnitude of future potential impacts on ecosystem services/socio-economic factors?                                    | Lower          | Lower impact i unfavourable conditions for cold-water species (COMTE, L., BUISSON, L., DAUFRESNE, M. and GRENOUILLET, G. (2013), Climate-induced changes in the distribution of freshwater fish: observed and predicted trends. Freshwater Biology, 58: 625-639. <a href="https://doi.org/10.1111/fwb.12081">https://doi.org/10.1111/fwb.12081</a> ).                                                                                                                                                                                                         | Low       |

| Statistics                                     |      |
|------------------------------------------------|------|
| Scores                                         |      |
| BRA                                            | 22.0 |
| BRA Outcome                                    | -    |
| BRA+CCA                                        | 12.0 |
| BRA+CCA Outcome                                | -    |
| Score partition                                |      |
| A. Biogeography/ Historical                    | 18.0 |
| 1. Domestication/Cultivation                   | 4.0  |
| 2. Climate, distribution and introduction risk | 0.0  |
| 3. Invasive elsewhere                          | 14.0 |
| B. Biology/ Ecology                            | 4.0  |
| 4. Undesirable (or persistence) traits         | 4.0  |
| 5. Resource exploitation                       | 5.0  |
| 6. Reproduction                                | -1.0 |
| 7. Dispersal mechanisms                        | -4.0 |



|                                                |              |
|------------------------------------------------|--------------|
| 8. Tolerance attributes                        | 0.0          |
| <b>C. Climate change</b>                       | <b>-10.0</b> |
| 9. Climate change                              | -10.0        |
| <b>Answered Questions</b>                      |              |
| <b>Total</b>                                   | <b>55</b>    |
| <b>A. Biogeography/Historical</b>              | <b>13</b>    |
| 1. Domestication/Cultivation                   | 3            |
| 2. Climate, distribution and introduction risk | 5            |
| 3. Invasive elsewhere                          | 5            |
| <b>B. Biology/Ecology</b>                      | <b>36</b>    |
| 4. Undesirable (or persistence) traits         | 12           |
| 5. Resource exploitation                       | 2            |
| 6. Reproduction                                | 7            |
| 7. Dispersal mechanisms                        | 9            |
| 8. Tolerance attributes                        | 6            |
| <b>C. Climate change</b>                       | <b>6</b>     |
| 9. Climate change                              | 6            |
| <b>Sectors affected</b>                        |              |
| <b>Commercial</b>                              | <b>10</b>    |
| <b>Environmental</b>                           | <b>5</b>     |
| <b>Species or population nuisance traits</b>   | <b>-2</b>    |

|                   |             |
|-------------------|-------------|
| <b>Thresholds</b> |             |
| <b>BRA</b>        | <b>-</b>    |
| <b>BRA+CCA</b>    | <b>-</b>    |
| <b>Confidence</b> |             |
| <b>BRA+CCA</b>    | <b>0.69</b> |
| <b>BRA</b>        | <b>0.72</b> |
| <b>CCA</b>        | <b>0.42</b> |

|                            |  |
|----------------------------|--|
| <b>Date and Time</b>       |  |
| <b>19/05/2021 11:38:25</b> |  |

AS-ISK v2

| Taxon and Assessor details         |                                         |
|------------------------------------|-----------------------------------------|
| Category                           | Fishes and Lampreys (freshwater)        |
| Taxon name                         | <i>Salvelinus namaycush</i>             |
| Common name                        | lake charr                              |
| Assessor                           | Tamara Kanjuh                           |
| Risk screening context             |                                         |
| Reason and socio-economic benefits |                                         |
| Risk assessment area               | Danube & Adriatic basins BA, HR, ME, RS |
| Taxonomy                           |                                         |
| Native range                       |                                         |
| Introduced range                   |                                         |
| URL                                |                                         |

|                                                |      | Response                                                                                                                                                                | Justification (references and/or other information) | Confidence                                                                                                                                                                                            |           |
|------------------------------------------------|------|-------------------------------------------------------------------------------------------------------------------------------------------------------------------------|-----------------------------------------------------|-------------------------------------------------------------------------------------------------------------------------------------------------------------------------------------------------------|-----------|
| A. Biogeography/Historical                     |      |                                                                                                                                                                         |                                                     |                                                                                                                                                                                                       |           |
| 1. Domestication/Cultivation                   |      |                                                                                                                                                                         |                                                     |                                                                                                                                                                                                       |           |
| 1                                              | 1.01 | Has the taxon been the subject of domestication (or cultivation) for at least 20 generations?                                                                           | Yes                                                 | Success of the stocked fish has varied depending on the area ( <a href="https://animaldiversity.org/accounts/Salvelinus_namaycush/">https://animaldiversity.org/accounts/Salvelinus_namaycush/</a> ). | Very high |
| 2                                              | 1.02 | Is the taxon harvested in the wild and likely to be sold or used in its live form?                                                                                      | Yes                                                 | Often caught by fishers (Billard, 1997).                                                                                                                                                              | High      |
| 3                                              | 1.03 | Does the taxon have invasive races, varieties, sub-taxa or congeners?                                                                                                   | No                                                  | Did not find information about invasive ones.                                                                                                                                                         | Low       |
| 2. Climate, distribution and introduction risk |      |                                                                                                                                                                         |                                                     |                                                                                                                                                                                                       |           |
| 4                                              | 2.01 | How similar are the climatic conditions of the Risk Assessment (RA) area and the taxon's native range?                                                                  | Medium                                              | Dfa, Dfb (Köppen–Geiger climate classification system)                                                                                                                                                | High      |
| 5                                              | 2.02 | What is the quality of the climate matching data?                                                                                                                       | High                                                | Köppen–Geiger climate classification system                                                                                                                                                           | High      |
| 6                                              | 2.03 | Is the taxon already present outside of captivity in the RA area?                                                                                                       | Yes                                                 | Radočaj et al. (2021)                                                                                                                                                                                 | Medium    |
| 7                                              | 2.04 | How many potential vectors could the taxon use to enter in the RA area?                                                                                                 | One                                                 | Stocking: <i>Salvelinus namaycush</i> is primarily bred and stocked for recreational fisheries worldwide (Fuller, 2007).                                                                              | Very high |
| 8                                              | 2.05 | Is the taxon currently found in close proximity to, and likely to enter into, the RA area in the near future (e.g. unintentional and intentional introductions)?        | Yes                                                 | Radočaj et al. (2021)                                                                                                                                                                                 | High      |
| 3. Invasive elsewhere                          |      |                                                                                                                                                                         |                                                     |                                                                                                                                                                                                       |           |
| 9                                              | 3.01 | Has the taxon become naturalised (established viable populations) outside its native range?                                                                             | No                                                  | No information found.                                                                                                                                                                                 | Medium    |
| 10                                             | 3.02 | In the taxon's introduced range, are there known adverse impacts to wild stocks or commercial taxa?                                                                     | Yes                                                 | Radočaj et al. (2021)                                                                                                                                                                                 | High      |
| 11                                             | 3.03 | In the taxon's introduced range, are there known adverse impacts to aquaculture?                                                                                        | Yes                                                 | Radočaj et al. (2021)                                                                                                                                                                                 | Medium    |
| 12                                             | 3.04 | In the taxon's introduced range, are there known adverse impacts to ecosystem services?                                                                                 | Yes                                                 | Radočaj et al. (2021)                                                                                                                                                                                 | Medium    |
| 13                                             | 3.05 | In the taxon's introduced range, are there known adverse socio-economic impacts?                                                                                        | Yes                                                 | Radočaj et al. (2021)                                                                                                                                                                                 | Medium    |
| B. Biology/Ecology                             |      |                                                                                                                                                                         |                                                     |                                                                                                                                                                                                       |           |
| 4. Undesirable (or persistence) traits         |      |                                                                                                                                                                         |                                                     |                                                                                                                                                                                                       |           |
| 14                                             | 4.01 | Is it likely that the taxon will be poisonous or pose other risks to human health?                                                                                      | No                                                  | Harmless (FishBase)                                                                                                                                                                                   | High      |
| 15                                             | 4.02 | Is it likely that the taxon will smother one or more native taxa (that are not threatened or protected)?                                                                | Yes                                                 | It can happen due to food competition, space occupation, hybridization.                                                                                                                               | Medium    |
| 16                                             | 4.03 | Are there any threatened or protected taxa that the non-native taxon would parasitise in the RA area?                                                                   | No                                                  | The taxon is not a parasite.                                                                                                                                                                          | High      |
| 17                                             | 4.04 | Is the taxon adaptable in terms of climatic and other environmental conditions, thus enhancing its potential persistence if it has invaded or could invade the RA area? | No                                                  | Sensitive to environmental conditions.                                                                                                                                                                | Medium    |
| 18                                             | 4.05 | Is the taxon likely to disrupt food-web structure/function in aquatic ecosystems if it has invaded or is likely to invade the RA area?                                  | Yes                                                 | Radočaj et al. (2021)                                                                                                                                                                                 | Medium    |
| 19                                             | 4.06 | Is the taxon likely to exert adverse impacts on ecosystem services in the RA area?                                                                                      | No                                                  | No information found.                                                                                                                                                                                 | Low       |
| 20                                             | 4.07 | Is it likely that the taxon will host, and/or act as a vector for, recognised pests and infectious agents that are endemic in the RA area?                              | No                                                  | No information found.                                                                                                                                                                                 | Low       |
| 21                                             | 4.08 | Is it likely that the taxon will host, and/or act as a vector for, recognised pests and infectious agents that are absent from (novel to) the RA area?                  | No                                                  | No information found.                                                                                                                                                                                 | Low       |
| 22                                             | 4.09 | Is it likely that the taxon will achieve a body size that will make it more likely to be released from captivity?                                                       | No                                                  | Not in captivity.                                                                                                                                                                                     | Medium    |
| 23                                             | 4.10 | Is the taxon capable of sustaining itself in a range of water velocity conditions (e.g. versatile in habitat use)?                                                      | Yes                                                 | Radočaj et al. (2021)                                                                                                                                                                                 | High      |
| 24                                             | 4.11 | Is it likely that the taxon's mode of existence (e.g. excretion of by-products) or behaviours (e.g. feeding) will reduce habitat quality for native taxa?               | Yes                                                 | Radočaj et al. (2021)                                                                                                                                                                                 | High      |
| 25                                             | 4.12 | Is the taxon likely to maintain a viable population even when present in low densities (or persisting in adverse conditions by way of a dormant form)?                  | No                                                  | No information found.                                                                                                                                                                                 | Low       |

| 5. Resource exploitation |      |                                                                                                                                                                              |          |                                                                                                                                                                  |           |
|--------------------------|------|------------------------------------------------------------------------------------------------------------------------------------------------------------------------------|----------|------------------------------------------------------------------------------------------------------------------------------------------------------------------|-----------|
| 26                       | 5.01 | Is the taxon likely to consume threatened or protected native taxa in the RA area?                                                                                           | Yes      | Radočaj et al. (2021)                                                                                                                                            | High      |
| 27                       | 5.02 | Is the taxon likely to sequester food resources (including nutrients) to the detriment of native taxa in the RA area?                                                        | No       | No information found.                                                                                                                                            | Low       |
| 6. Reproduction          |      |                                                                                                                                                                              |          |                                                                                                                                                                  |           |
| 28                       | 6.01 | Is the taxon likely to exhibit parental care and/or to reduce age-at-maturity in response to environmental conditions?                                                       | No       | No information found.                                                                                                                                            | Medium    |
| 29                       | 6.02 | Is the taxon likely to produce viable gametes or propagules (in the RA area)?                                                                                                | Yes      | Radočaj et al. (2021)                                                                                                                                            | High      |
| 30                       | 6.03 | Is the taxon likely to hybridise naturally with native taxa?                                                                                                                 | No       | Not native, but yes with <i>Salvelinus fontinalis</i> (Nova Scotia Fisheries and Aquaculture, Inland Fisheries Division, 2007).                                  | High      |
| 31                       | 6.04 | Is the taxon likely to be hermaphroditic or to display asexual reproduction?                                                                                                 | No       | Kottelat&Freyhof (2007)                                                                                                                                          | High      |
| 32                       | 6.05 | Is the taxon dependent on the presence of another taxon (or specific habitat features) to complete its life cycle?                                                           | No       | Kottelat&Freyhof (2007)                                                                                                                                          | High      |
| 33                       | 6.06 | Is the taxon known (or likely) to produce a large number of propagules or offspring within a short time span (e.g. < 1 year)?                                                | Yes      | Kottelat&Freyhof (2007)                                                                                                                                          | High      |
| 34                       | 6.07 | How many time units (days, months, years) does the taxon require to reach the age-at-first-reproduction?                                                                     | 5        | Age at maturity varies widely from around 5 years in southern areas of its native range to more than 20 years in northern areas (cabi.org).                      | Very high |
| 7. Dispersal mechanisms  |      |                                                                                                                                                                              |          |                                                                                                                                                                  |           |
| 35                       | 7.01 | How many potential internal vectors/pathways could the taxon use to disperse within the RA area (with suitable vectors)?                                                     | One      | Intentional stockong.                                                                                                                                            | Very high |
| 36                       | 7.02 | Will any of these vectors/pathways bring the taxon in close proximity to one or more protected areas (e.g. MCZ, MPA, SSSI)?                                                  | Yes      | Intentional stocking.                                                                                                                                            | High      |
| 37                       | 7.03 | Does the taxon have a means of actively attaching itself to hard substrata (e.g. ship hulls, pilings, buoys) such that it enhances the likelihood of dispersal?              | No       | Kottelat&Feryhof (2007)                                                                                                                                          | High      |
| 38                       | 7.04 | Is natural dispersal of the taxon likely to occur as eggs (for animals) or as propagules (for plants: seeds, spores) in the RA area?                                         | No       | The dispersal of <i>Salvelinus namaycush</i> downstream and into new tributaries through regular stocking upstream is bound to occur (Hesthagen&Sandlund, 2007). | High      |
| 39                       | 7.05 | Is natural dispersal of the taxon likely to occur as larvae/juveniles (for animals) or as fragments/seedlings (for plants) in the RA area?                                   | Yes      | The dispersal of <i>Salvelinus namaycush</i> downstream and into new tributaries through regular stocking upstream is bound to occur (Hesthagen&Sandlund, 2007). | High      |
| 40                       | 7.06 | Are older life stages of the taxon likely to migrate in the RA area for reproduction?                                                                                        | Yes      | In large water bodies such as the Great Lakes, <i>S. namaycush</i> may migrate up to 300 km (186 mi) to their spawning grounds.                                  | Medium    |
| 41                       | 7.07 | Are propagules or eggs of the taxon likely to be dispersed in the RA area by other animals?                                                                                  | No       | Kottelat&Freyhof, 2007                                                                                                                                           | Medium    |
| 42                       | 7.08 | Is dispersal of the taxon along any of the vectors/pathways mentioned in the previous seven questions (35–41; i.e. both unintentional or intentional) likely to be           | Yes      | Intentional stocking.                                                                                                                                            | High      |
| 43                       | 7.09 | Is dispersal of the taxon density dependent?                                                                                                                                 | No       | No information found.                                                                                                                                            | Medium    |
| 8. Tolerance attributes  |      |                                                                                                                                                                              |          |                                                                                                                                                                  |           |
| 44                       | 8.01 | Is the taxon able to withstand being out of water for extended periods (e.g. minimum of one or more hours) at some stage of its life cycle?                                  | No       | Can not survive out of water.                                                                                                                                    | High      |
| 45                       | 8.02 | Is the taxon tolerant of a wide range of water quality conditions relevant to that taxon? [In the Justification field, indicate the relevant water quality variable(s) being | No       | Sensitive to environmental conditions.                                                                                                                           | Medium    |
| 46                       | 8.03 | Can the taxon be controlled or eradicated in the wild with chemical, biological, or other agents/means?                                                                      | Yes      | Preventative measures: Hewitt et al. (2006); Copp et al. (2005) and physical measures: Kaeding et al. (1996)                                                     | High      |
| 47                       | 8.04 | Is the taxon likely to tolerate or benefit from environmental/human disturbance?                                                                                             | No       | <i>Salvelinus namaycush</i> are particularly susceptible to pollution, including but not limited to insecticides (FishBase, 2008).                               | High      |
| 48                       | 8.05 | Is the taxon able to tolerate salinity levels that are higher or lower than those found in its usual environment?                                                            | No       | Sensitive to environmental conditions.                                                                                                                           | Medium    |
| 49                       | 8.06 | Are there effective natural enemies (predators) of the taxon present in the RA                                                                                               | Yes      | Like other salmonids.                                                                                                                                            | Medium    |
| C. Climate change        |      |                                                                                                                                                                              |          |                                                                                                                                                                  |           |
| 9. Climate change        |      |                                                                                                                                                                              |          |                                                                                                                                                                  |           |
| 50                       | 9.01 | Under the predicted future climatic conditions, are the risks of entry into the RA area posed by the taxon likely to increase, decrease or not change?                       | Decrease | Sensitive to environmental conditions.                                                                                                                           | Medium    |
| 51                       | 9.02 | Under the predicted future climatic conditions, are the risks of establishment posed by the taxon likely to increase, decrease or not change?                                | Decrease | Sensitive to environmental conditions.                                                                                                                           | Medium    |
| 52                       | 9.03 | Under the predicted future climatic conditions, are the risks of dispersal within the RA area posed by the taxon likely to increase, decrease or not change?                 | Decrease | Sensitive to environmental conditions.                                                                                                                           | Medium    |
| 53                       | 9.04 | Under the predicted future climatic conditions, what is the likely magnitude of future potential impacts on biodiversity and/or ecological integrity/status?                 | Lower    | Sensitive to environmental conditions.                                                                                                                           | Medium    |

|    |      |                                                                                                                                                        |       |                                        |        |
|----|------|--------------------------------------------------------------------------------------------------------------------------------------------------------|-------|----------------------------------------|--------|
| 54 | 9.05 | Under the predicted future climatic conditions, what is the likely magnitude of future potential impacts on ecosystem structure and/or function?       | Lower | Sensitive to environmental conditions. | Medium |
| 55 | 9.06 | Under the predicted future climatic conditions, what is the likely magnitude of future potential impacts on ecosystem services/socio-economic factors? | Lower | Sensitive to environmental conditions. | Medium |

| Statistics                                     |              |
|------------------------------------------------|--------------|
| Scores                                         |              |
| <b>BRA</b>                                     | <b>12.0</b>  |
| <b>BRA Outcome</b>                             | <b>-</b>     |
| <b>BRA+CCA</b>                                 | <b>0.0</b>   |
| <b>BRA+CCA Outcome</b>                         | <b>-</b>     |
| Score partition                                |              |
| <b>A. Biogeography/Historical</b>              | <b>9.0</b>   |
| 1. Domestication/Cultivation                   | 2.0          |
| 2. Climate, distribution and introduction risk | 1.0          |
| 3. Invasive elsewhere                          | 6.0          |
| <b>B. Biology/Ecology</b>                      | <b>3.0</b>   |
| 4. Undesirable (or persistence) traits         | 3.0          |
| 5. Resource exploitation                       | 5.0          |
| 6. Reproduction                                | 0.0          |
| 7. Dispersal mechanisms                        | 1.0          |
| 8. Tolerance attributes                        | -6.0         |
| <b>C. Climate change</b>                       | <b>-12.0</b> |
| 9. Climate change                              | -12.0        |
| Answered Questions                             |              |
| <b>Total</b>                                   | <b>55</b>    |
| <b>A. Biogeography/Historical</b>              | <b>13</b>    |
| 1. Domestication/Cultivation                   | 3            |
| 2. Climate, distribution and introduction risk | 5            |
| 3. Invasive elsewhere                          | 5            |
| <b>B. Biology/Ecology</b>                      | <b>36</b>    |
| 4. Undesirable (or persistence) traits         | 12           |
| 5. Resource exploitation                       | 2            |
| 6. Reproduction                                | 7            |
| 7. Dispersal mechanisms                        | 9            |
| 8. Tolerance attributes                        | 6            |
| <b>C. Climate change</b>                       | <b>6</b>     |
| 9. Climate change                              | 6            |
| Sectors affected                               |              |
| <b>Commercial</b>                              | <b>9</b>     |
| <b>Environmental</b>                           | <b>6</b>     |
| <b>Species or population nuisance traits</b>   | <b>-12</b>   |

| Thresholds     |             |
|----------------|-------------|
| <b>BRA</b>     | <b>-</b>    |
| <b>BRA+CCA</b> | <b>-</b>    |
| Confidence     |             |
| <b>BRA+CCA</b> | <b>0.61</b> |
| <b>BRA</b>     | <b>0.63</b> |
| <b>CCA</b>     | <b>0.50</b> |

| Date and Time       |  |
|---------------------|--|
| 02/06/2021 21:42:47 |  |

## AS-ISK v2

| Taxon and Assessor details         |                                         |
|------------------------------------|-----------------------------------------|
| Category                           | Fishes and Lampreys (freshwater)        |
| Taxon name                         | <i>Salvelinus namaycush</i>             |
| Common name                        | lake charr                              |
| Assessor                           | Tena Radocaj                            |
| Risk screening context             |                                         |
| Reason and socio-economic benefits |                                         |
| Risk assessment area               | Danube & Adriatic basins BA, HR, ME, RS |
| Taxonomy                           |                                         |
| Native range                       |                                         |
| Introduced range                   |                                         |
| URL                                |                                         |

|                                                |      | Response                                                                                                                                                                | Justification (references and/or other information) | Confidence                                                                                                                                                                                                                                                                                                                                                                                                                              |        |
|------------------------------------------------|------|-------------------------------------------------------------------------------------------------------------------------------------------------------------------------|-----------------------------------------------------|-----------------------------------------------------------------------------------------------------------------------------------------------------------------------------------------------------------------------------------------------------------------------------------------------------------------------------------------------------------------------------------------------------------------------------------------|--------|
| A. Biogeography/Historical                     |      |                                                                                                                                                                         |                                                     |                                                                                                                                                                                                                                                                                                                                                                                                                                         |        |
| 1. Domestication/Cultivation                   |      |                                                                                                                                                                         |                                                     |                                                                                                                                                                                                                                                                                                                                                                                                                                         |        |
| 1                                              | 1.01 | Has the taxon been the subject of domestication (or cultivation) for at least 20 generations?                                                                           | Yes                                                 | Ackefors, H. (1982). Aquaculture: A New Industry in Sweden. Ambio, 11(6), 362-365.                                                                                                                                                                                                                                                                                                                                                      | High   |
| 2                                              | 1.02 | Is the taxon harvested in the wild and likely to be sold or used in its live form?                                                                                      | Yes                                                 | Morissette, O. , Sirois, P. , Lester, N. P. , Wilson, C. C. , & Bernatchez, L. (2018). Supplementation stocking of Lake Trout ( <i>Salvelinus namaycush</i> ) in small boreal lakes: Ecotypes influence on growth and condition. PLoS ONE, 13, e0200599                                                                                                                                                                                 | High   |
| 3                                              | 1.03 | Does the taxon have invasive races, varieties, sub-taxa or congeners?                                                                                                   | Yes                                                 | <i>Salvelinus fontinalis</i>                                                                                                                                                                                                                                                                                                                                                                                                            | Medium |
| 2. Climate, distribution and introduction risk |      |                                                                                                                                                                         |                                                     |                                                                                                                                                                                                                                                                                                                                                                                                                                         |        |
| 4                                              | 2.01 | How similar are the climatic conditions of the Risk Assessment (RA) area and the taxon's native range?                                                                  | High                                                | The similarity between climatic conditions RA area and native range is high. I use climatch.                                                                                                                                                                                                                                                                                                                                            | Medium |
| 5                                              | 2.02 | What is the quality of the climate matching data?                                                                                                                       | Medium                                              | The quality of the climate matching data is medium.                                                                                                                                                                                                                                                                                                                                                                                     | Medium |
| 6                                              | 2.03 | Is the taxon already present outside of captivity in the RA area?                                                                                                       | No                                                  | Lake trout is not present outside of captivity in the RA area.                                                                                                                                                                                                                                                                                                                                                                          | High   |
| 7                                              | 2.04 | How many potential vectors could the taxon use to enter in the RA area?                                                                                                 | One                                                 | One potential vectors: recreational fisheries. (CABI, 2019)                                                                                                                                                                                                                                                                                                                                                                             | Medium |
| 8                                              | 2.05 | Is the taxon currently found in close proximity to, and likely to enter into, the RA area in the near future (e.g. unintentional and intentional introductions)?        | Yes                                                 | Lake trout established populations on the Northern Italy (several localities). (Bianco, P. G., & Ketmaier, V. (2001). Anthropogenic changes in the freshwater fish fauna of Italy, with reference to the central region and <i>Barbus graellsii</i> , a newly established alien species of Iberian origin. Journal of Fish Biology, 59, 190-208.)                                                                                       | Medium |
| 3. Invasive elsewhere                          |      |                                                                                                                                                                         |                                                     |                                                                                                                                                                                                                                                                                                                                                                                                                                         |        |
| 9                                              | 3.01 | Has the taxon become naturalised (established viable populations) outside its native range?                                                                             | Yes                                                 | Lake trout have self-sustaining populations in Norwegian freshwaters and Northern Italy. Lake trout were released in 1971 into two small lakes. (Hesthagen, T., & Sandlund, O. T. (2007). Non-native freshwater fishes in Norway: history, consequences and perspectives. Journal of Fish Biology, 71, 173-183.) (Kottelat, M. and J. Freyhof 2007 Handbook of European freshwater fishes. Publications Kottelat. Cornol. Switzerland.) | Medium |
| 10                                             | 3.02 | In the taxon's introduced range, are there known adverse impacts to wild stocks or commercial taxa?                                                                     | Yes                                                 | Lake Trout stocking is associated with declines of toads in the Alps and of salamanders <i>Euproctis</i> sp. in the Pyrenees. (Lobón-Cerviá, J., Esteve, M., Berrebi, P., Duchi, A., Lorenzoni, M., & Young, K. A. (2019). Trout and char of central and Southern Europe and Northern Africa. Trout and char of the world. Bethesda, Maryland: American Fisheries Society.)                                                             | Medium |
| 11                                             | 3.03 | In the taxon's introduced range, are there known adverse impacts to aquaculture?                                                                                        | No                                                  | Rarely used in aquaculture (Fisheries and Aquaculture Department. Introduced Species Fact Sheets. In: FAO Fisheries and Aquaculture Department [online]. Rome. Updated 17 March 2017. [Cited 22 April 2020]), no documented impacts.                                                                                                                                                                                                    | Low    |
| 12                                             | 3.04 | In the taxon's introduced range, are there known adverse impacts to ecosystem services?                                                                                 | Yes                                                 | The introduction of the invasive trout species <i>Salvelinus namaycush</i> has had detrimental effects on native biodiversity worldwide. Many various species of fish are affected not only by competition but by predation as well (Fuller, 2007). (GISD, 2009)                                                                                                                                                                        | Medium |
| 13                                             | 3.05 | In the taxon's introduced range, are there known adverse socio-economic impacts?                                                                                        | Yes                                                 | Pam Fuller, and Matt Neilson, 2020, <i>Salvelinus namaycush</i> (Walbaum in Artedi, 1792): U.S. Geological Survey, Nonindigenous Aquatic Species Database, Gainesville, FL, <a href="https://nas.er.usgs.gov/queries/FactSheet.aspx?SpeciesID=942">https://nas.er.usgs.gov/queries/FactSheet.aspx?SpeciesID=942</a> , Revision Date: 11/12/2019, Peer Review Date                                                                       | Low    |
| B. Biology/Ecology                             |      |                                                                                                                                                                         |                                                     |                                                                                                                                                                                                                                                                                                                                                                                                                                         |        |
| 4. Undesirable (or persistence) traits         |      |                                                                                                                                                                         |                                                     |                                                                                                                                                                                                                                                                                                                                                                                                                                         |        |
| 14                                             | 4.01 | Is it likely that the taxon will be poisonous or pose other risks to human health?                                                                                      | No                                                  | Lake trout is harmless for human health (Fishbase)                                                                                                                                                                                                                                                                                                                                                                                      | Low    |
| 15                                             | 4.02 | Is it likely that the taxon will smother one or more native taxa (that are not threatened or protected)?                                                                | Yes                                                 | Pam Fuller, and Matt Neilson, 2020, <i>Salvelinus namaycush</i> (Walbaum in Artedi, 1792): U.S. Geological Survey, Nonindigenous Aquatic Species Database, Gainesville, FL, <a href="https://nas.er.usgs.gov/queries/FactSheet.aspx?SpeciesID=942">https://nas.er.usgs.gov/queries/FactSheet.aspx?SpeciesID=942</a> , Revision Date: 11/12/2019, Peer Review Date                                                                       | Medium |
| 16                                             | 4.03 | Are there any threatened or protected taxa that the non-native taxon would parasitise in the RA area?                                                                   | No                                                  | No                                                                                                                                                                                                                                                                                                                                                                                                                                      | Medium |
| 17                                             | 4.04 | Is the taxon adaptable in terms of climatic and other environmental conditions, thus enhancing its potential persistence if it has invaded or could invade the RA area? | No                                                  | Lake trout use habitat: temperate; 4°C - 13°C, it is not enough to survive in Croatia. (Fishbase- Michigan Department of Natural Resources, 2019. Lake trout. <a href="https://www.michigan.gov/dnr/0,8817,7-350-">https://www.michigan.gov/dnr/0,8817,7-350-</a>                                                                                                                                                                       | Low    |
| 18                                             | 4.05 | Is the taxon likely to disrupt food-web structure/function in aquatic ecosystems if it has invaded or is likely to invade the RA                                        | No                                                  | Because, it not survive in RA area                                                                                                                                                                                                                                                                                                                                                                                                      | Low    |
| 19                                             | 4.06 | Is the taxon likely to exert adverse impacts on ecosystem services in the RA area?                                                                                      | No                                                  | The taxon will not have an adverse impact on ecosystem services in the RA area.                                                                                                                                                                                                                                                                                                                                                         | Low    |

|                                 |      |                                                                                                                                                                              |                |                                                                                                                                                                                                                                                                                                                                                                                                           |           |
|---------------------------------|------|------------------------------------------------------------------------------------------------------------------------------------------------------------------------------|----------------|-----------------------------------------------------------------------------------------------------------------------------------------------------------------------------------------------------------------------------------------------------------------------------------------------------------------------------------------------------------------------------------------------------------|-----------|
| 20                              | 4.07 | Is it likely that the taxon will host, and/or act as a vector for, recognised pests and infectious agents that are endemic in the RA                                         | Yes            | Yes, the taxon may be a host or vector of known pests and infectious agents endemic to RA area. Because in every area exist infectious agents and pests.                                                                                                                                                                                                                                                  | Low       |
| 21                              | 4.08 | Is it likely that the taxon will host, and/or act as a vector for, recognised pests and infectious agents that are absent from (novel to) the RA area?                       | Yes            | Salmonid Herpesvirus-3, commonly known as the Epizootic Epitheliotropic Disease virus (EEDV), causes a disease of lake trout ( <i>Salvelinus namaycush</i> ) that has killed millions of fish over the past several decades. (Faisal, M., Purbayu, M., Shavali, M. A., Marsh, T. L., & Loch, T. P. (2019). Shedding of the Salmonid Herpesvirus-3 by Infected Lake Trout ( <i>Salvelinus namaycush</i> ). | Medium    |
| 22                              | 4.09 | Is it likely that the taxon will achieve a body size that will make it more likely to be released from captivity?                                                            | Yes            | Size up to 10 about 1000 mm SL. usually 350-450 mm SL. (Kottelat, M. and J. Freyhof 2007 Handbook of European freshwater fishes. Publications Kottelat, Cornol, Switzerland.)                                                                                                                                                                                                                             | Medium    |
| 23                              | 4.10 | Is the taxon capable of sustaining itself in a range of water velocity conditions (e.g. versatile in habitat use)?                                                           | No             | Occurs in shallow and deep waters of northern lakes and streams (Froese & Pauly 2020).                                                                                                                                                                                                                                                                                                                    | Low       |
| 24                              | 4.11 | Is it likely that the taxon's mode of existence (e.g. excretion of by-products) or behaviours (e.g. feeding) will reduce habitat quality for native taxa?                    | No             | no data available                                                                                                                                                                                                                                                                                                                                                                                         | Low       |
| 25                              | 4.12 | Is the taxon likely to maintain a viable population even when present in low densities (or persisting in adverse conditions by way of a dormant form)?                       | No             | no data available                                                                                                                                                                                                                                                                                                                                                                                         | Medium    |
| <b>5. Resource exploitation</b> |      |                                                                                                                                                                              |                |                                                                                                                                                                                                                                                                                                                                                                                                           |           |
| 26                              | 5.01 | Is the taxon likely to consume threatened or protected native taxa in the RA area?                                                                                           | Yes            | It is possible that it consume endangered and protected native taxa in the RA area. If there are protected taxa in the RA area will consume them, whether or not the taxon is endangered.                                                                                                                                                                                                                 | Low       |
| 27                              | 5.02 | Is the taxon likely to sequester food resources (including nutrients) to the detriment of native taxa in the RA area?                                                        | Not applicable | not applicable                                                                                                                                                                                                                                                                                                                                                                                            | Very high |
| <b>6. Reproduction</b>          |      |                                                                                                                                                                              |                |                                                                                                                                                                                                                                                                                                                                                                                                           |           |
| 28                              | 6.01 | Is the taxon likely to exhibit parental care and/or to reduce age-at-maturity in response to environmental conditions?                                                       | Yes            | Lenart, S. 2001. " <i>Salvelinus namaycush</i> " (On-line), Animal Diversity Web. Accessed May 15, 2020 at <a href="https://animaldiversity.org/accounts/Salvelinus_namaycush/">https://animaldiversity.org/accounts/Salvelinus_namaycush/</a>                                                                                                                                                            | Medium    |
| 29                              | 6.02 | Is the taxon likely to produce viable gametes or propagules (in the RA area)?                                                                                                | No             | Established in some high altitude lakes in Pyrenees, north Italy and Scandinavia. In lakes of Alps (France, Switzerland) apparently survives only by stocking (Kottelat & Freyhof 2008).                                                                                                                                                                                                                  | Low       |
| 30                              | 6.03 | Is the taxon likely to hybridise naturally with native taxa?                                                                                                                 | No             | No                                                                                                                                                                                                                                                                                                                                                                                                        | Low       |
| 31                              | 6.04 | Is the taxon likely to be hermaphroditic or to display asexual reproduction?                                                                                                 | No             | No                                                                                                                                                                                                                                                                                                                                                                                                        | Low       |
| 32                              | 6.05 | Is the taxon dependent on the presence of another taxon (or specific habitat features) to complete its life cycle?                                                           | Yes            | David T. Callaghan, Paul J. Blanchfield, Peter A. Cott (2016): Lake trout ( <i>Salvelinus namaycush</i> ) spawning habitat in a northern lake: The role of wind and physical characteristics on habitat quality. <i>Journal of Great Lakes Research</i> , Volume 42, Issue 2, 2016, Pages 299-309.                                                                                                        | Low       |
| 33                              | 6.06 | Is the taxon known (or likely) to produce a large number of propagules or offspring within a short time span (e.g. < 1 year)?                                                | Yes            | David T. Callaghan, Paul J. Blanchfield, Peter A. Cott, Lake trout ( <i>Salvelinus namaycush</i> ) spawning habitat in a northern lake: The role of wind and physical characteristics on habitat quality. <i>Journal of Great Lakes Research</i> , Volume 42, Issue 2, 2016, Pages 299-309.                                                                                                               | Medium    |
| 34                              | 6.07 | How many time units (days, months, years) does the taxon require to reach the age-at-first-reproduction?                                                                     | 6              | Spawns for the first time at 6-7 years. (Kottelat, M. and J. Freyhof 2007 Handbook of European freshwater fishes. Publications Kottelat, Cornol, Switzerland.)                                                                                                                                                                                                                                            | Very high |
| <b>7. Dispersal mechanisms</b>  |      |                                                                                                                                                                              |                |                                                                                                                                                                                                                                                                                                                                                                                                           |           |
| 35                              | 7.01 | How many potential internal vectors/pathways could the taxon use to disperse within the RA area (with suitable vectors)?                                                     | >1             | Two potential vectors: natural dispersal and recreational fisheries.                                                                                                                                                                                                                                                                                                                                      | Medium    |
| 36                              | 7.02 | Will any of these vectors/pathways bring the taxon in close proximity to one or more protected areas (e.g. MCZ, MPA, SSSI)?                                                  | No             | That vector/pathway can't bring taxon in protected area.                                                                                                                                                                                                                                                                                                                                                  | Low       |
| 37                              | 7.03 | Does the taxon have a means of actively attaching itself to hard substrata (e.g. ship hulls, pilings, buoys) such that it enhances the likelihood of dispersal?              | No             | No adaptations.                                                                                                                                                                                                                                                                                                                                                                                           | Low       |
| 38                              | 7.04 | Is natural dispersal of the taxon likely to occur as eggs (for animals) or as propagules (for plants: seeds, spores) in the RA area?                                         | No             | Probably no possible reproduction in RA area, even if introduced to adequate habitats similar to Alpine lakes in Switzerland and France (Kottelat & Freyhof 2008).                                                                                                                                                                                                                                        | Low       |
| 39                              | 7.05 | Is natural dispersal of the taxon likely to occur as larvae/juveniles (for animals) or as fragments/seedlings (for plants) in the RA area?                                   | No             | Probably no possible reproduction in RA area, even if introduced to adequate habitats similar to Alpine lakes in Switzerland and France (Kottelat & Freyhof 2008).                                                                                                                                                                                                                                        | Low       |
| 40                              | 7.06 | Are older life stages of the taxon likely to migrate in the RA area for reproduction?                                                                                        | No             | Probably no possible reproduction in RA area, even if introduced to adequate habitats similar to Alpine lakes in Switzerland and France (Kottelat & Freyhof 2008).                                                                                                                                                                                                                                        | Low       |
| 41                              | 7.07 | Are propagules or eggs of the taxon likely to be dispersed in the RA area by other animals?                                                                                  | No             | Probably no possible reproduction in RA area, even if introduced to adequate habitats similar to Alpine lakes in Switzerland and France (Kottelat & Freyhof 2008).                                                                                                                                                                                                                                        | Medium    |
| 42                              | 7.08 | Is dispersal of the taxon along any of the vectors/pathways mentioned in the previous seven questions (35-41; i.e. both unintentional or intentional) likely to be?          | Yes            | There is a possibility of a high rate of spread of taxa. Eg. if a fertilized individual enters a new area by any means of expansion.                                                                                                                                                                                                                                                                      | Low       |
| 43                              | 7.09 | Is dispersal of the taxon density dependent?                                                                                                                                 | No             | no data available                                                                                                                                                                                                                                                                                                                                                                                         | Low       |
| <b>8. Tolerance attributes</b>  |      |                                                                                                                                                                              |                |                                                                                                                                                                                                                                                                                                                                                                                                           |           |
| 44                              | 8.01 | Is the taxon able to withstand being out of water for extended periods (e.g. minimum of one or more hours) at some stage of its life cycle?                                  | No             | Sensitive species, not tolerant to low oxygen levels                                                                                                                                                                                                                                                                                                                                                      | Low       |
| 45                              | 8.02 | Is the taxon tolerant of a wide range of water quality conditions relevant to that taxon? [In the Justification field, indicate the relevant water quality variable(s) being | No             | <i>S. namaycush</i> prefers temperatures below 13°C and is rarely found in lakes with pH less than 5.2 (Global Invasive Species Database (2020) Species profile: <i>Salvelinus namaycush</i> . Downloaded from                                                                                                                                                                                            | Low       |

|                          |      |                                                                                                                                                              |                |                                                                                                                                                                                                                                                                                                                                                                                                       |           |
|--------------------------|------|--------------------------------------------------------------------------------------------------------------------------------------------------------------|----------------|-------------------------------------------------------------------------------------------------------------------------------------------------------------------------------------------------------------------------------------------------------------------------------------------------------------------------------------------------------------------------------------------------------|-----------|
| 46                       | 8.03 | Can the taxon be controlled or eradicated in the wild with chemical, biological, or other agents/means?                                                      | Not applicable | It is not regulated in Croatia                                                                                                                                                                                                                                                                                                                                                                        | Very high |
| 47                       | 8.04 | Is the taxon likely to tolerate or benefit from environmental/human disturbance?                                                                             | Yes            | Pam Fuller, and Matt Neilson, 2020, <i>Salvelinus namaycush</i> (Walbaum in Artedi, 1792): U.S. Geological Survey, Nonindigenous Aquatic Species Database, Gainesville, FL, <a href="https://nas.er.usgs.gov/queries/FactSheet.aspx?SpeciesID=942">https://nas.er.usgs.gov/queries/FactSheet.aspx?SpeciesID=942</a> , Revision Date: 11/12/2019, Peer Review Date: 2/2/2016, Access Date: 4/22/2020). | Medium    |
| 48                       | 8.05 | Is the taxon able to tolerate salinity levels that are higher or lower than those found in its usual environment?                                            | No             | Muir, A.M., Hansen, M.J., Bronte, C.R. and Krueger, C.C. (2016), If Arctic charr <i>Salvelinus alpinus</i> is 'the most diverse vertebrate', what is the lake charr <i>Salvelinus namaycush</i> ?. Fish Fish, 17: 1194-1207. doi:10.1111/faf.12114                                                                                                                                                    | Medium    |
| 49                       | 8.06 | Are there effective natural enemies (predators) of the taxon present in the RA                                                                               | Yes            | Otters, piscivorous birds..                                                                                                                                                                                                                                                                                                                                                                           | Medium    |
| <b>C. Climate change</b> |      |                                                                                                                                                              |                |                                                                                                                                                                                                                                                                                                                                                                                                       |           |
| <b>9. Climate change</b> |      |                                                                                                                                                              |                |                                                                                                                                                                                                                                                                                                                                                                                                       |           |
| 50                       | 9.01 | Under the predicted future climatic conditions, are the risks of entry into the RA area posed by the taxon likely to increase, decrease or not change?       | No change      | The risk of entering the RA area does not change. The risk may be increased due to recreational fishing (human impact), but not due to climate change.                                                                                                                                                                                                                                                | Medium    |
| 51                       | 9.02 | Under the predicted future climatic conditions, are the risks of establishment posed by the taxon likely to increase, decrease or not change?                | Decrease       | Cold water species, tolerates water up to about 13 degrees Celsius (Fishbase)                                                                                                                                                                                                                                                                                                                         | Medium    |
| 52                       | 9.03 | Under the predicted future climatic conditions, are the risks of dispersal within the RA area posed by the taxon likely to increase, decrease or not change? | Decrease       | Cold water species, tolerates water up to about 13 degrees Celsius (Fishbase)                                                                                                                                                                                                                                                                                                                         | Medium    |
| 53                       | 9.04 | Under the predicted future climatic conditions, what is the likely magnitude of future potential impacts on biodiversity and/or ecological integrity/status? | Lower          | Future potential impacts on biodiversity and ecological status will lower.                                                                                                                                                                                                                                                                                                                            | Medium    |
| 54                       | 9.05 | Under the predicted future climatic conditions, what is the likely magnitude of future potential impacts on ecosystem structure and/or function?             | Lower          | The future potential impacts on ecosystem structure and function will lower.                                                                                                                                                                                                                                                                                                                          | Medium    |
| 55                       | 9.06 | Under the predicted future climatic conditions, what is the likely magnitude of future potential impacts on ecosystem services/socio-economic factors?       | Lower          | The future potential impacts on ecosystem services and socio-economic factors will lower.                                                                                                                                                                                                                                                                                                             | Medium    |

| Statistics                                     |              |
|------------------------------------------------|--------------|
| Scores                                         |              |
| <b>BRA</b>                                     | <b>21.0</b>  |
| <b>BRA Outcome</b>                             | <b>-</b>     |
| <b>BRA+CCA</b>                                 | <b>11.0</b>  |
| <b>BRA+CCA Outcome</b>                         | <b>-</b>     |
| Score partition                                |              |
| <b>A. Biogeography/Historical</b>              | <b>18.0</b>  |
| 1. Domestication/Cultivation                   | 4.0          |
| 2. Climate, distribution and introduction risk | 0.0          |
| 3. Invasive elsewhere                          | 14.0         |
| <b>B. Biology/Ecology</b>                      | <b>3.0</b>   |
| 4. Undesirable (or persistence) traits         | 3.0          |
| 5. Resource exploitation                       | 5.0          |
| 6. Reproduction                                | -2.0         |
| 7. Dispersal mechanisms                        | -3.0         |
| 8. Tolerance attributes                        | 0.0          |
| <b>C. Climate change</b>                       | <b>-10.0</b> |
| 9. Climate change                              | -10.0        |
| Answered Questions                             |              |
| <b>Total</b>                                   | <b>55</b>    |
| <b>A. Biogeography/Historical</b>              | <b>13</b>    |
| 1. Domestication/Cultivation                   | 3            |
| 2. Climate, distribution and introduction risk | 5            |
| 3. Invasive elsewhere                          | 5            |
| <b>B. Biology/Ecology</b>                      | <b>36</b>    |
| 4. Undesirable (or persistence) traits         | 12           |
| 5. Resource exploitation                       | 2            |
| 6. Reproduction                                | 7            |
| 7. Dispersal mechanisms                        | 9            |
| 8. Tolerance attributes                        | 6            |
| <b>C. Climate change</b>                       | <b>6</b>     |
| 9. Climate change                              | 6            |
| Sectors affected                               |              |
| <b>Commercial</b>                              | <b>11</b>    |
| <b>Environmental</b>                           | <b>5</b>     |
| <b>Species or population nuisance traits</b>   | <b>-3</b>    |

| Thresholds     |             |
|----------------|-------------|
| <b>BRA</b>     | <b>-</b>    |
| <b>BRA+CCA</b> | <b>-</b>    |
| Confidence     |             |
| <b>BRA+CCA</b> | <b>0.44</b> |
| <b>BRA</b>     | <b>0.43</b> |
| <b>CCA</b>     | <b>0.50</b> |

| Date and Time       |  |
|---------------------|--|
| 15/05/2020 14:02:35 |  |

## AS-ISK v2

| Taxon and Assessor details         |                                         |
|------------------------------------|-----------------------------------------|
| Category                           | Fishes and Lampreys (freshwater)        |
| Taxon name                         | <i>Salvelinus umbla</i>                 |
| Common name                        | Alpine charr                            |
| Assessor                           | Ana Marić                               |
| Risk screening context             |                                         |
| Reason and socio-economic benefits |                                         |
| Risk assessment area               | Danube & Adriatic basins BA, HR, ME, RS |
| Taxonomy                           |                                         |
| Native range                       |                                         |
| Introduced range                   |                                         |
| URL                                |                                         |

|                                                |      | Response                                                                                                                                                                | Justification (references and/or other information) | Confidence                                                                                                                                                                                                                                              |           |
|------------------------------------------------|------|-------------------------------------------------------------------------------------------------------------------------------------------------------------------------|-----------------------------------------------------|---------------------------------------------------------------------------------------------------------------------------------------------------------------------------------------------------------------------------------------------------------|-----------|
| A. Biogeography/Historical                     |      |                                                                                                                                                                         |                                                     |                                                                                                                                                                                                                                                         |           |
| 1. Domestication/Cultivation                   |      |                                                                                                                                                                         |                                                     |                                                                                                                                                                                                                                                         |           |
| 1                                              | 1.01 | Has the taxon been the subject of domestication (or cultivation) for at least 20 generations?                                                                           | No                                                  | Differences in immune components of blood, spleen and head kidney between diploid and auto- and allotriploid Salmonidae<br>Author links open overlay panelFranzLahnsteiner. 2020                                                                        | High      |
| 2                                              | 1.02 | Is the taxon harvested in the wild and likely to be sold or used in its live form?                                                                                      | Yes                                                 | Trout and Char of Central and Southern Europe and Northern Africa Javier Lobón-Cerviá, Manu Esteve, Patrick Berrebi, Antonino Duchi, Massimo Lorenzoni, Kyle A. Young. 2018                                                                             | Very high |
| 3                                              | 1.03 | Does the taxon have invasive races, varieties, sub-taxa or congeners?                                                                                                   | Yes                                                 | Salvelinus fontinalis Identifying threats from introduced and translocated non-native freshwater fishes in neighbouring countries under current and future climatic conditions Tena Radočaj a, Ivan Špelić a, Lorenzo Vilizzi b, *, Meta Povž c, Marina | Very high |
| 2. Climate, distribution and introduction risk |      |                                                                                                                                                                         |                                                     |                                                                                                                                                                                                                                                         |           |
| 4                                              | 2.01 | How similar are the climatic conditions of the Risk Assessment (RA) area and the taxon's native range?                                                                  | Medium                                              | Only few high altitude lakes in target area                                                                                                                                                                                                             | High      |
| 5                                              | 2.02 | What is the quality of the climate matching data?                                                                                                                       | Medium                                              | Climatch                                                                                                                                                                                                                                                | High      |
| 6                                              | 2.03 | Is the taxon already present outside of captivity in the RA area?                                                                                                       | No                                                  | Identifying threats from introduced and translocated non-native freshwater fishes in neighbouring countries under current and future climatic conditions Tena Radočaj a, Ivan Špelić a, Lorenzo Vilizzi b, *, Meta Povž c, Marina Piria. 2021           | Very high |
| 7                                              | 2.04 | How many potential vectors could the taxon use to enter in the RA area?                                                                                                 | One                                                 | Stocking                                                                                                                                                                                                                                                | Very high |
| 8                                              | 2.05 | Is the taxon currently found in close proximity to, and likely to enter into, the RA area in the near future (e.g. unintentional and intentional introductions)?        | Yes                                                 | Trout and Char of Central and Southern Europe and Northern Africa Javier Lobón-Cerviá, Manu Esteve, Patrick Berrebi, Antonino Duchi, Massimo Lorenzoni, Kyle A. Young. 2018 Is it likely to enter? Horizont species                                     | High      |
| 3. Invasive elsewhere                          |      |                                                                                                                                                                         |                                                     |                                                                                                                                                                                                                                                         |           |
| 9                                              | 3.01 | Has the taxon become naturalised (established viable populations) outside its native range?                                                                             | Yes                                                 | Trout and Char of Central and Southern Europe and Northern Africa Javier Lobón-Cerviá, Manu Esteve, Patrick Berrebi, Antonino Duchi, Massimo Lorenzoni, Kyle A. Young. 2018                                                                             | Very high |
| 10                                             | 3.02 | In the taxon's introduced range, are there known adverse impacts to wild stocks or commercial taxa?                                                                     | No                                                  | Trout and Char of Central and Southern Europe and Northern Africa Javier Lobón-Cerviá, Manu Esteve, Patrick Berrebi, Antonino Duchi, Massimo Lorenzoni, Kyle A. Young. 2018                                                                             | Very high |
| 11                                             | 3.03 | In the taxon's introduced range, are there known adverse impacts to aquaculture?                                                                                        | No                                                  | Trout and Char of Central and Southern Europe and Northern Africa Javier Lobón-Cerviá, Manu Esteve, Patrick Berrebi, Antonino Duchi, Massimo Lorenzoni, Kyle A. Young. 2018                                                                             | Very high |
| 12                                             | 3.04 | In the taxon's introduced range, are there known adverse impacts to ecosystem services?                                                                                 | No                                                  | Trout and Char of Central and Southern Europe and Northern Africa Javier Lobón-Cerviá, Manu Esteve, Patrick Berrebi, Antonino Duchi, Massimo Lorenzoni, Kyle A. Young. 2018                                                                             | Very high |
| 13                                             | 3.05 | In the taxon's introduced range, are there known adverse socio-economic impacts?                                                                                        | No                                                  | Trout and Char of Central and Southern Europe and Northern Africa Javier Lobón-Cerviá, Manu Esteve, Patrick Berrebi, Antonino Duchi, Massimo Lorenzoni, Kyle A. Young. 2018                                                                             | High      |
| B. Biology/Ecology                             |      |                                                                                                                                                                         |                                                     |                                                                                                                                                                                                                                                         |           |
| 4. Undesirable (or persistence) traits         |      |                                                                                                                                                                         |                                                     |                                                                                                                                                                                                                                                         |           |
| 14                                             | 4.01 | Is it likely that the taxon will be poisonous or pose other risks to human health?                                                                                      | No                                                  | Trout and Char of Central and Southern Europe and Northern Africa Javier Lobón-Cerviá, Manu Esteve, Patrick Berrebi, Antonino Duchi, Massimo Lorenzoni, Kyle A. Young. 2018                                                                             | Very high |
| 15                                             | 4.02 | Is it likely that the taxon will smother one or more native taxa (that are not threatened or protected)?                                                                | No                                                  | Trout and Char of Central and Southern Europe and Northern Africa Javier Lobón-Cerviá, Manu Esteve, Patrick Berrebi, Antonino Duchi, Massimo Lorenzoni, Kyle A. Young. 2018                                                                             | High      |
| 16                                             | 4.03 | Are there any threatened or protected taxa that the non-native taxon would parasitise in the RA area?                                                                   | No                                                  | Trout and Char of Central and Southern Europe and Northern Africa Javier Lobón-Cerviá, Manu Esteve, Patrick Berrebi, Antonino Duchi, Massimo Lorenzoni, Kyle A. Young. 2018                                                                             | High      |
| 17                                             | 4.04 | Is the taxon adaptable in terms of climatic and other environmental conditions, thus enhancing its potential persistence if it has invaded or could invade the RA area? | No                                                  | Trout and Char of Central and Southern Europe and Northern Africa Javier Lobón-Cerviá, Manu Esteve, Patrick Berrebi, Antonino Duchi, Massimo Lorenzoni, Kyle A. Young. 2018                                                                             | High      |
| 18                                             | 4.05 | Is the taxon likely to disrupt food-web structure/function in aquatic ecosystems if it has invaded or is likely to invade the RA area?                                  | No                                                  | Trout and Char of Central and Southern Europe and Northern Africa Javier Lobón-Cerviá, Manu Esteve, Patrick Berrebi, Antonino Duchi, Massimo Lorenzoni, Kyle A. Young. 2018                                                                             | High      |
| 19                                             | 4.06 | Is the taxon likely to exert adverse impacts on ecosystem services in the RA area?                                                                                      | No                                                  | Trout and Char of Central and Southern Europe and Northern Africa Javier Lobón-Cerviá, Manu Esteve, Patrick Berrebi, Antonino Duchi, Massimo Lorenzoni, Kyle A. Young. 2018                                                                             | High      |
| 20                                             | 4.07 | Is it likely that the taxon will host, and/or act as a vector for, recognised pests and infectious agents that are endemic in the RA area?                              | No                                                  | Trout and Char of Central and Southern Europe and Northern Africa Javier Lobón-Cerviá, Manu Esteve, Patrick Berrebi, Antonino Duchi, Massimo Lorenzoni, Kyle A. Young. 2018                                                                             | Medium    |
| 21                                             | 4.08 | Is it likely that the taxon will host, and/or act as a vector for, recognised pests and infectious agents that are absent from (novel to) the RA area?                  | Yes                                                 | Trout and Char of Central and Southern Europe and Northern Africa Javier Lobón-Cerviá, Manu Esteve, Patrick Berrebi, Antonino Duchi, Massimo Lorenzoni, Kyle A. Young. 2018                                                                             | High      |
| 22                                             | 4.09 | Is it likely that the taxon will achieve a body size that will make it more likely to be released from captivity?                                                       | Yes                                                 | https://www.fishbase.se/summary/Salvelinus-umbla.html                                                                                                                                                                                                   | High      |



|                                 |      |                                                                                                                                                                              |                |                                                                                                                                                                                                                                                      |           |
|---------------------------------|------|------------------------------------------------------------------------------------------------------------------------------------------------------------------------------|----------------|------------------------------------------------------------------------------------------------------------------------------------------------------------------------------------------------------------------------------------------------------|-----------|
| 23                              | 4.10 | Is the taxon capable of sustaining itself in a range of water velocity conditions (e.g. versatile in habitat use)?                                                           | Yes            | Key factors explaining critical swimming speed in freshwater fish: a review and statistical analysis for Iberian species Carlos Cano-Barbacid, Johannes Radinger, María Argudo, Francesc Rubio-Gracia, Anna Vila-Gispert & Emili García-Berthou 2020 | Medium    |
| 24                              | 4.11 | Is it likely that the taxon's mode of existence (e.g. excretion of by-products) or behaviours (e.g. feeding) will reduce habitat quality for native taxa?                    | No             | Trout and Char of Central and Southern Europe and Northern Africa Javier Lobón-Cerviá, Manu Esteve, Patrick Berrebi, Antonino Duchi, Massimo Lorenzoni, Kyle A. Young. 2018                                                                          | Very high |
| 25                              | 4.12 | Is the taxon likely to maintain a viable population even when present in low densities (or persisting in adverse conditions by way of a dormant form)?                       | No             | Trout and Char of Central and Southern Europe and Northern Africa Javier Lobón-Cerviá, Manu Esteve, Patrick Berrebi, Antonino Duchi, Massimo Lorenzoni, Kyle A. Young. 2018                                                                          | High      |
| <b>5. Resource exploitation</b> |      |                                                                                                                                                                              |                |                                                                                                                                                                                                                                                      |           |
| 26                              | 5.01 | Is the taxon likely to consume threatened or protected native taxa in the RA area?                                                                                           | Yes            | Trout and Char of Central and Southern Europe and Northern Africa Javier Lobón-Cerviá, Manu Esteve, Patrick Berrebi, Antonino Duchi, Massimo Lorenzoni, Kyle A. Young. 2018 fishbase                                                                 | Very high |
| 27                              | 5.02 | Is the taxon likely to sequester food resources (including nutrients) to the detriment of native taxa in the RA area?                                                        | Yes            | Trout and Char of Central and Southern Europe and Northern Africa Javier Lobón-Cerviá, Manu Esteve, Patrick Berrebi, Antonino Duchi, Massimo Lorenzoni, Kyle A. Young. 2018                                                                          | High      |
| <b>6. Reproduction</b>          |      |                                                                                                                                                                              |                |                                                                                                                                                                                                                                                      |           |
| 28                              | 6.01 | Is the taxon likely to exhibit parental care and/or to reduce age-at-maturity in response to environmental conditions?                                                       | No             | Trout and Char of Central and Southern Europe and Northern Africa Javier Lobón-Cerviá, Manu Esteve, Patrick Berrebi, Antonino Duchi, Massimo Lorenzoni, Kyle A. Young. 2018                                                                          | Medium    |
| 29                              | 6.02 | Is the taxon likely to produce viable gametes or propagules (in the RA area)?                                                                                                | Yes            | Non-native Freshwater Fishes in Slovenia Meta Povž. 2017                                                                                                                                                                                             | Very high |
| 30                              | 6.03 | Is the taxon likely to hybridise naturally with native taxa?                                                                                                                 | Yes            | Salmo x Salvelinus                                                                                                                                                                                                                                   | Medium    |
| 31                              | 6.04 | Is the taxon likely to be hermaphroditic or to display asexual reproduction?                                                                                                 | No             | <a href="https://www.fishbase.se/summary/Salvelinus-umbla.html">https://www.fishbase.se/summary/Salvelinus-umbla.html</a>                                                                                                                            | Very high |
| 32                              | 6.05 | Is the taxon dependent on the presence of another taxon (or specific habitat features) to complete its life cycle?                                                           | No             | <a href="https://www.fishbase.se/summary/Salvelinus-umbla.html">https://www.fishbase.se/summary/Salvelinus-umbla.html</a>                                                                                                                            | Very high |
| 33                              | 6.06 | Is the taxon known (or likely) to produce a large number of propagules or offspring within a short time span (e.g. < 1 year)?                                                | Yes            | <a href="https://www.fishbase.se/summary/Salvelinus-umbla.html">https://www.fishbase.se/summary/Salvelinus-umbla.html</a>                                                                                                                            | High      |
| 34                              | 6.07 | How many time units (days, months, years) does the taxon require to reach the age-at-first-reproduction?                                                                     | 2              | Kottelat. 2007                                                                                                                                                                                                                                       | Very high |
| <b>7. Dispersal mechanisms</b>  |      |                                                                                                                                                                              |                |                                                                                                                                                                                                                                                      |           |
| 35                              | 7.01 | How many potential internal vectors/pathways could the taxon use to disperse within the RA area (with suitable vectors)?                                                     | One            | Stocking                                                                                                                                                                                                                                             | Very high |
| 36                              | 7.02 | Will any of these vectors/pathways bring the taxon in close proximity to one or more protected areas (e.g. MCZ, MPA, SSSI)?                                                  | Yes            | Stocking                                                                                                                                                                                                                                             | Very high |
| 37                              | 7.03 | Does the taxon have a means of actively attaching itself to hard substrata (e.g. ship hulls, pilings, buoys) such that it enhances the likelihood of dispersal?              | No             | <a href="https://www.fishbase.se/summary/Salvelinus-umbla.html">https://www.fishbase.se/summary/Salvelinus-umbla.html</a>                                                                                                                            | Very high |
| 38                              | 7.04 | Is natural dispersal of the taxon likely to occur as eggs (for animals) or as propagules (for plants: seeds, spores) in the RA area?                                         | No             | <a href="https://www.fishbase.se/summary/Salvelinus-umbla.html">https://www.fishbase.se/summary/Salvelinus-umbla.html</a>                                                                                                                            | Very high |
| 39                              | 7.05 | Is natural dispersal of the taxon likely to occur as larvae/juveniles (for animals) or as fragments/seedlings (for plants) in the RA area?                                   | Yes            | <a href="https://www.fishbase.se/summary/Salvelinus-umbla.html">https://www.fishbase.se/summary/Salvelinus-umbla.html</a> by stocking yes                                                                                                            | High      |
| 40                              | 7.06 | Are older life stages of the taxon likely to migrate in the RA area for reproduction?                                                                                        | Yes            | <a href="https://www.fishbase.se/summary/Salvelinus-umbla.html">https://www.fishbase.se/summary/Salvelinus-umbla.html</a> yes by stocking                                                                                                            | High      |
| 41                              | 7.07 | Are propagules or eggs of the taxon likely to be dispersed in the RA area by other animals?                                                                                  | No             | <a href="https://www.fishbase.se/summary/Salvelinus-umbla.html">https://www.fishbase.se/summary/Salvelinus-umbla.html</a>                                                                                                                            | High      |
| 42                              | 7.08 | Is dispersal of the taxon along any of the vectors/pathways mentioned in the previous seven questions (35-41; i.e. both unintentional or intentional) likely to be           | No             | Trout and Char of Central and Southern Europe and Northern Africa Javier Lobón-Cerviá, Manu Esteve, Patrick Berrebi, Antonino Duchi, Massimo Lorenzoni, Kyle A. Young. 2018                                                                          | High      |
| 43                              | 7.09 | Is dispersal of the taxon density dependent?                                                                                                                                 | No             | Trout and Char of Central and Southern Europe and Northern Africa Javier Lobón-Cerviá, Manu Esteve, Patrick Berrebi, Antonino Duchi, Massimo Lorenzoni, Kyle A. Young. 2018                                                                          | Medium    |
| <b>8. Tolerance attributes</b>  |      |                                                                                                                                                                              |                |                                                                                                                                                                                                                                                      |           |
| 44                              | 8.01 | Is the taxon able to withstand being out of water for extended periods (e.g. minimum of one or more hours) at some stage of its life cycle?                                  | No             | Trout and Char of Central and Southern Europe and Northern Africa Javier Lobón-Cerviá, Manu Esteve, Patrick Berrebi, Antonino Duchi, Massimo Lorenzoni, Kyle A. Young. 2018                                                                          | Very high |
| 45                              | 8.02 | Is the taxon tolerant of a wide range of water quality conditions relevant to that taxon? [In the Justification field, indicate the relevant water quality variable(s) being | No             | Trout and Char of Central and Southern Europe and Northern Africa Javier Lobón-Cerviá, Manu Esteve, Patrick Berrebi, Antonino Duchi, Massimo Lorenzoni, Kyle A. Young. 2018                                                                          | Very high |
| 46                              | 8.03 | Can the taxon be controlled or eradicated in the wild with chemical, biological, or other agents/means?                                                                      | Not applicable | Trout and Char of Central and Southern Europe and Northern Africa Javier Lobón-Cerviá, Manu Esteve, Patrick Berrebi, Antonino Duchi, Massimo Lorenzoni, Kyle A. Young. 2018                                                                          | High      |
| 47                              | 8.04 | Is the taxon likely to tolerate or benefit from environmental/human disturbance?                                                                                             | No             | Trout and Char of Central and Southern Europe and Northern Africa Javier Lobón-Cerviá, Manu Esteve, Patrick Berrebi, Antonino Duchi, Massimo Lorenzoni, Kyle A. Young. 2018                                                                          | Very high |
| 48                              | 8.05 | Is the taxon able to tolerate salinity levels that are higher or lower than those found in its usual environment?                                                            | Yes            | Salvelinus fontinalis is                                                                                                                                                                                                                             | Medium    |
| 49                              | 8.06 | Are there effective natural enemies (predators) of the taxon present in the RA area?                                                                                         | Yes            | Trout and Char of Central and Southern Europe and Northern Africa Javier Lobón-Cerviá, Manu Esteve, Patrick Berrebi, Antonino Duchi, Massimo Lorenzoni, Kyle A. Young. 2018                                                                          | Very high |
| <b>C. Climate change</b>        |      |                                                                                                                                                                              |                |                                                                                                                                                                                                                                                      |           |
| <b>9. Climate change</b>        |      |                                                                                                                                                                              |                |                                                                                                                                                                                                                                                      |           |

|    |      |                                                                                                                                                              |           |                                                                                                                                                                             |           |
|----|------|--------------------------------------------------------------------------------------------------------------------------------------------------------------|-----------|-----------------------------------------------------------------------------------------------------------------------------------------------------------------------------|-----------|
| 50 | 9.01 | Under the predicted future climatic conditions, are the risks of entry into the RA area posed by the taxon likely to increase, decrease or not change?       | No change | Trout and Char of Central and Southern Europe and Northern Africa Javier Lobón-Cerviá, Manu Esteve, Patrick Berrebi, Antonino Duchi, Massimo Lorenzoni, Kyle A. Young. 2018 | Very high |
| 51 | 9.02 | Under the predicted future climatic conditions, are the risks of establishment posed by the taxon likely to increase, decrease or not change?                | Decrease  | Trout and Char of Central and Southern Europe and Northern Africa Javier Lobón-Cerviá, Manu Esteve, Patrick Berrebi, Antonino Duchi, Massimo Lorenzoni, Kyle A. Young. 2018 | Very high |
| 52 | 9.03 | Under the predicted future climatic conditions, are the risks of dispersal within the RA area posed by the taxon likely to increase, decrease or not change? | No change | Trout and Char of Central and Southern Europe and Northern Africa Javier Lobón-Cerviá, Manu Esteve, Patrick Berrebi, Antonino Duchi, Massimo Lorenzoni, Kyle A. Young. 2018 | Very high |
| 53 | 9.04 | Under the predicted future climatic conditions, what is the likely magnitude of future potential impacts on biodiversity and/or ecological integrity/status? | No change | Trout and Char of Central and Southern Europe and Northern Africa Javier Lobón-Cerviá, Manu Esteve, Patrick Berrebi, Antonino Duchi, Massimo Lorenzoni, Kyle A. Young. 2018 | Very high |
| 54 | 9.05 | Under the predicted future climatic conditions, what is the likely magnitude of future potential impacts on ecosystem structure and/or function?             | Lower     | Trout and Char of Central and Southern Europe and Northern Africa Javier Lobón-Cerviá, Manu Esteve, Patrick Berrebi, Antonino Duchi, Massimo Lorenzoni, Kyle A. Young. 2018 | High      |
| 55 | 9.06 | Under the predicted future climatic conditions, what is the likely magnitude of future potential impacts on ecosystem services/socio-economic factors?       | Lower     | Trout and Char of Central and Southern Europe and Northern Africa Javier Lobón-Cerviá, Manu Esteve, Patrick Berrebi, Antonino Duchi, Massimo Lorenzoni, Kyle A. Young. 2018 | High      |

| Statistics                                     |             |
|------------------------------------------------|-------------|
| Scores                                         |             |
| <b>BRA</b>                                     | <b>14.5</b> |
| <b>BRA Outcome</b>                             | <b>-</b>    |
| <b>BRA+CCA</b>                                 | <b>8.5</b>  |
| <b>BRA+CCA Outcome</b>                         | <b>-</b>    |
| Score partition                                |             |
| <b>A. Biogeography/Historical</b>              | <b>3.5</b>  |
| 1. Domestication/Cultivation                   | 2.0         |
| 2. Climate, distribution and introduction risk | 0.0         |
| 3. Invasive elsewhere                          | 1.5         |
| <b>B. Biology/Ecology</b>                      | <b>11.0</b> |
| 4. Undesirable (or persistence) traits         | 2.0         |
| 5. Resource exploitation                       | 7.0         |
| 6. Reproduction                                | 3.0         |
| 7. Dispersal mechanisms                        | 0.0         |
| 8. Tolerance attributes                        | -1.0        |
| <b>C. Climate change</b>                       | <b>-6.0</b> |
| 9. Climate change                              | -6.0        |
| Answered Questions                             |             |
| <b>Total</b>                                   | <b>55</b>   |
| <b>A. Biogeography/Historical</b>              | <b>13</b>   |
| 1. Domestication/Cultivation                   | 3           |
| 2. Climate, distribution and introduction risk | 5           |
| 3. Invasive elsewhere                          | 5           |
| <b>B. Biology/Ecology</b>                      | <b>36</b>   |
| 4. Undesirable (or persistence) traits         | 12          |
| 5. Resource exploitation                       | 2           |
| 6. Reproduction                                | 7           |
| 7. Dispersal mechanisms                        | 9           |
| 8. Tolerance attributes                        | 6           |
| <b>C. Climate change</b>                       | <b>6</b>    |
| 9. Climate change                              | 6           |
| Sectors affected                               |             |
| <b>Commercial</b>                              | <b>-1</b>   |
| <b>Environmental</b>                           | <b>4</b>    |
| <b>Species or population nuisance traits</b>   | <b>7</b>    |

| Thresholds     |             |
|----------------|-------------|
| <b>BRA</b>     | <b>-</b>    |
| <b>BRA+CCA</b> | <b>-</b>    |
| Confidence     |             |
| <b>BRA+CCA</b> | <b>0.85</b> |
| <b>BRA</b>     | <b>0.84</b> |
| <b>CCA</b>     | <b>0.92</b> |

| Date and Time       |  |
|---------------------|--|
| 24/05/2021 15:36:09 |  |

## AS-ISK v2

| Taxon and Assessor details         |                                         |
|------------------------------------|-----------------------------------------|
| Category                           | Fishes and Lampreys (freshwater)        |
| Taxon name                         | <i>Salvelinus umbla</i>                 |
| Common name                        | Alpine charr                            |
| Assessor                           | Ivan Špelić                             |
| Risk screening context             |                                         |
| Reason and socio-economic benefits |                                         |
| Risk assessment area               | Danube & Adriatic basins BA, HR, ME, RS |
| Taxonomy                           |                                         |
| Native range                       |                                         |
| Introduced range                   |                                         |
| URL                                |                                         |

|                                                |      |                                                                                                                                                                         | Response | Justification (references and/or other information)                                                                                                                                                                                                                                                       | Confidence |
|------------------------------------------------|------|-------------------------------------------------------------------------------------------------------------------------------------------------------------------------|----------|-----------------------------------------------------------------------------------------------------------------------------------------------------------------------------------------------------------------------------------------------------------------------------------------------------------|------------|
| A. Biogeography / Historical                   |      |                                                                                                                                                                         |          |                                                                                                                                                                                                                                                                                                           |            |
| 1. Domestication/Cultivation                   |      |                                                                                                                                                                         |          |                                                                                                                                                                                                                                                                                                           |            |
| 1                                              | 1.01 | Has the taxon been the subject of domestication (or cultivation) for at least 20 generations?                                                                           | Yes      | For stocking programs (Kottelat & Freyhof 2007).                                                                                                                                                                                                                                                          | Medium     |
| 2                                              | 1.02 | Is the taxon harvested in the wild and likely to be sold or used in its live form?                                                                                      | Yes      | Restocking of lakes (Kottelat & Freyhof 2007).                                                                                                                                                                                                                                                            | High       |
| 3                                              | 1.03 | Does the taxon have invasive races, varieties, sub-taxa or congeners?                                                                                                   | Yes      | <i>S. fontinalis</i> (CABI 2019)                                                                                                                                                                                                                                                                          | High       |
| 2. Climate, distribution and introduction risk |      |                                                                                                                                                                         |          |                                                                                                                                                                                                                                                                                                           |            |
| 4                                              | 2.01 | How similar are the climatic conditions of the Risk Assessment (RA) area and the taxon's native range?                                                                  | Low      | Climatch 2020                                                                                                                                                                                                                                                                                             | Medium     |
| 5                                              | 2.02 | What is the quality of the climate matching data?                                                                                                                       | Medium   | Climatch 2020                                                                                                                                                                                                                                                                                             | High       |
| 6                                              | 2.03 | Is the taxon already present outside of captivity in the RA area?                                                                                                       | No       | Lenhardt, M., Markovic, G., Hegedis, A., Maletin, S., Cirkovic, M., Markovic, Z., 2011. Non-native and translocated fish species in Serbia and their impact on the native ichthyofauna. Reviews in Fish Biology and Fisheries 21, 407–421.. doi:10.1007/s11160-010-                                       | High       |
| 7                                              | 2.04 | How many potential vectors could the taxon use to enter in the RA area?                                                                                                 | One      | Introduction for angling.                                                                                                                                                                                                                                                                                 | Low        |
| 8                                              | 2.05 | Is the taxon currently found in close proximity to, and likely to enter into, the RA area in the near future (e.g. unintentional and intentional introductions)?        | Yes      | Slovenia (Povž 2018).                                                                                                                                                                                                                                                                                     | High       |
| 3. Invasive elsewhere                          |      |                                                                                                                                                                         |          |                                                                                                                                                                                                                                                                                                           |            |
| 9                                              | 3.01 | Has the taxon become naturalised (established viable populations) outside its                                                                                           | Yes      | Povž et al. 2018                                                                                                                                                                                                                                                                                          | Very high  |
| 10                                             | 3.02 | In the taxon's introduced range, are there known adverse impacts to wild stocks or commercial taxa?                                                                     | No       | Usually introduced to lakes without any fish species (Schabetsberger, R., Luger, M.S., Drozdowski, G., Jagsch, A., 2009. Only the small survive: monitoring long-term changes in the zooplankton community of an Alpine lake after fish introduction. Biological Invasions.. doi:10.1007/s10530-008-9341- | Medium     |
| 11                                             | 3.03 | In the taxon's introduced range, are there known adverse impacts to aquaculture?                                                                                        | No       | Usually introduced to lakes without any fish species (Schabetsberger, R., Luger, M.S., Drozdowski, G., Jagsch, A., 2009. Only the small survive: monitoring long-term changes in the zooplankton community of an Alpine lake after fish introduction. Biological Invasions.. doi:10.1007/s10530-008-9341- | Medium     |
| 12                                             | 3.04 | In the taxon's introduced range, are there known adverse impacts to ecosystem services?                                                                                 | No       | Usually introduced to lakes without any fish species (Schabetsberger, R., Luger, M.S., Drozdowski, G., Jagsch, A., 2009. Only the small survive: monitoring long-term changes in the zooplankton community of an Alpine lake after fish introduction. Biological Invasions.. doi:10.1007/s10530-008-9341- | High       |
| 13                                             | 3.05 | In the taxon's introduced range, are there known adverse socio-economic impacts?                                                                                        | No       | Usually introduced to lakes without any fish species (Schabetsberger, R., Luger, M.S., Drozdowski, G., Jagsch, A., 2009. Only the small survive: monitoring long-term changes in the zooplankton community of an Alpine lake after fish introduction. Biological Invasions.. doi:10.1007/s10530-008-9341- | High       |
| B. Biology / Ecology                           |      |                                                                                                                                                                         |          |                                                                                                                                                                                                                                                                                                           |            |
| 4. Undesirable (or persistence) traits         |      |                                                                                                                                                                         |          |                                                                                                                                                                                                                                                                                                           |            |
| 14                                             | 4.01 | Is it likely that the taxon will be poisonous or pose other risks to human health?                                                                                      | No       | Harmless (Froese & Pauly).                                                                                                                                                                                                                                                                                | Very high  |
| 15                                             | 4.02 | Is it likely that the taxon will smother one or more native taxa (that are not threatened or protected)?                                                                | Yes      | Adverse impact on large zooplankton (Schabetsberger, R., Luger, M.S., Drozdowski, G., Jagsch, A., 2009. Only the small survive: monitoring long-term changes in the zooplankton community of an Alpine lake after fish introduction. Biological Invasions.. doi:10.1007/s10530-008-9341-z).               | Medium     |
| 16                                             | 4.03 | Are there any threatened or protected taxa that the non-native taxon would parasitise in the RA area?                                                                   | No       | No parasitic behaviour.                                                                                                                                                                                                                                                                                   | Very high  |
| 17                                             | 4.04 | Is the taxon adaptable in terms of climatic and other environmental conditions, thus enhancing its potential persistence if it has invaded or could invade the RA area? | No       | Limited to deep, cold lakes (Povž et al. 2015).                                                                                                                                                                                                                                                           | High       |
| 18                                             | 4.05 | Is the taxon likely to disrupt food-web structure/function in aquatic ecosystems if it has invaded or is likely to invade the RA area?                                  | Yes      | Depletes large zooplankton (Schabetsberger, R., Luger, M.S., Drozdowski, G., Jagsch, A., 2009. Only the small survive: monitoring long-term changes in the zooplankton community of an Alpine lake after fish introduction. Biological Invasions.. doi:10.1007/s10530-008-9341-z).                        | Medium     |
| 19                                             | 4.06 | Is the taxon likely to exert adverse impacts on ecosystem services in the RA area?                                                                                      | No       | Usually introduced to lakes without other fish species to improve fishing (Aparicio, E., 2015. First record of a self-sustaining population of Alpine charr <i>Salvelinus umbla</i> (Linnaeus, 1758) (Actinopterygii, Salmonidae) in Spain. Graellsia..                                                   | Medium     |

|                                 |      |                                                                                                                                                                                           |                |                                                                                                                                                                                                                                                                                                |           |
|---------------------------------|------|-------------------------------------------------------------------------------------------------------------------------------------------------------------------------------------------|----------------|------------------------------------------------------------------------------------------------------------------------------------------------------------------------------------------------------------------------------------------------------------------------------------------------|-----------|
| 20                              | 4.07 | Is it likely that the taxon will host, and/or act as a vector for, recognised pests and infectious agents that are endemic in the RA area?                                                | Yes            | Achleitner, D., Gassner, H., & Schabetsberger, R. (2009). "Global worming": first record of an epidemic of <i>Trienophorus crassus</i> in a population of Arctic charr <i>Salvelinus umbla</i> . <i>Journal of Fish Biology</i> , 74(4), 961–966. doi:10.1111/j.1095-8649.2008.02166.x         | High      |
| 21                              | 4.08 | Is it likely that the taxon will host, and/or act as a vector for, recognised pests and infectious agents that are absent from (novel to) the RA area?                                    | Yes            | Achleitner, D., Gassner, H., & Schabetsberger, R. (2009). "Global worming": first record of an epidemic of <i>Trienophorus crassus</i> in a population of Arctic charr <i>Salvelinus umbla</i> . <i>Journal of Fish Biology</i> , 74(4), 961–966. doi:10.1111/j.1095-8649.2008.02166.x         | High      |
| 22                              | 4.09 | Is it likely that the taxon will achieve a body size that will make it more likely to be released from captivity?                                                                         | Yes            | Maximum length 110 cm (Povž et al. 2015).                                                                                                                                                                                                                                                      | Very high |
| 23                              | 4.10 | Is the taxon capable of sustaining itself in a range of water velocity conditions (e.g. versatile in habitat use)?                                                                        | No             | This species rarely thrives in running waters (Aparicio, E., 2015. First record of a self-sustaining population of Alpine charr <i>Salvelinus umbla</i> (Linnaeus, 1758) (Actinopterygii, Salmonidae) in Spain. <i>Graellsia</i> . doi:10.3989/graelisia.2015.v71.147).                        | High      |
| 24                              | 4.11 | Is it likely that the taxon's mode of existence (e.g. excretion of by-products) or behaviours (e.g. feeding) will reduce habitat quality for native taxa?                                 | No             | Lives in oligotrophic lakes, no behaviour to reduce habitat quality (Freyhof, J. & Kottelat, M. 2008. <i>Salvelinus umbla</i> . The IUCN Red List of Threatened Species 2008: e.T135426A4127943. https://dx.doi.org/10.2305/IUCN.UK.2008.RLTS.T135426A4127943.en. Downloaded on 07 May 2020.). | Very high |
| 25                              | 4.12 | Is the taxon likely to maintain a viable population even when present in low densities (or persisting in adverse conditions by way of a dormant form)?                                    | No             | Resilience low, minimum population doubling time 4.5 - 14 years (Froese & Pauly 2020). Usually maintained by stocking.                                                                                                                                                                         | High      |
| <b>5. Resource exploitation</b> |      |                                                                                                                                                                                           |                |                                                                                                                                                                                                                                                                                                |           |
| 26                              | 5.01 | Is the taxon likely to consume threatened or protected native taxa in the RA area?                                                                                                        | Yes            | Preys on crustaceans, insects and benthic fauna; a few individuals develop as large piscivores (Kottelat & Freyhof 2007).                                                                                                                                                                      | Low       |
| 27                              | 5.02 | Is the taxon likely to sequester food resources (including nutrients) to the detriment of native taxa in the RA area?                                                                     | Not applicable | No data for calculation.                                                                                                                                                                                                                                                                       | Very high |
| <b>6. Reproduction</b>          |      |                                                                                                                                                                                           |                |                                                                                                                                                                                                                                                                                                |           |
| 28                              | 6.01 | Is the taxon likely to exhibit parental care and/or to reduce age-at-maturity in response to environmental conditions?                                                                    | No             | Kottelat & Freyhof 2007.                                                                                                                                                                                                                                                                       | High      |
| 29                              | 6.02 | Is the taxon likely to produce viable gametes or propagules (in the RA area)?                                                                                                             | No             | Needs deep lakes to spawn. Spawns on pebble to stone bottom on steep slopes, at depths of 30–120 m (Kottelat & Freyhof 2007). Reproduction in Alpine lakes.                                                                                                                                    | Low       |
| 30                              | 6.03 | Is the taxon likely to hybridise naturally with native taxa?                                                                                                                              | No             | No documented hybrids in the wild with native species of RA area                                                                                                                                                                                                                               | Medium    |
| 31                              | 6.04 | Is the taxon likely to be hermaphroditic or to display asexual reproduction?                                                                                                              | No             | Kottelat & Freyhof 2007                                                                                                                                                                                                                                                                        | High      |
| 32                              | 6.05 | Is the taxon dependent on the presence of another taxon (or specific habitat features) to complete its life cycle?                                                                        | Yes            | Needs deep lakes to spawn. Spawns on pebble to stone bottom on steep slopes, at depths of 30–120 m (Kottelat & Freyhof 2007).                                                                                                                                                                  | Medium    |
| 33                              | 6.06 | Is the taxon known (or likely) to produce a large number of propagules or offspring within a short time span (e.g. < 1 year)?                                                             | Yes            | Up to 7300 eggs per female (Povž et al. 2015).                                                                                                                                                                                                                                                 | High      |
| 34                              | 6.07 | How many time units (days, months, years) does the taxon require to reach the age-at-first-reproduction?                                                                                  | 2              | 2–3 years (Kottelat & Freyhof 2007).                                                                                                                                                                                                                                                           | High      |
| <b>7. Dispersal mechanisms</b>  |      |                                                                                                                                                                                           |                |                                                                                                                                                                                                                                                                                                |           |
| 35                              | 7.01 | How many potential internal vectors/pathways could the taxon use to disperse within the RA area (with suitable)                                                                           | >1             | Stocking for angling (Povž et al. 2018).                                                                                                                                                                                                                                                       | Medium    |
| 36                              | 7.02 | Will any of these vectors/pathways bring the taxon in close proximity to one or more protected areas (e.g. MCZ, MPA, SSSI)?                                                               | Yes            | Personal opinion (some protected areas with lakes, e.g. Plitvice lakes).                                                                                                                                                                                                                       | Low       |
| 37                              | 7.03 | Does the taxon have a means of actively attaching itself to hard substrata (e.g. ship hulls, pilings, buoys) such that it enhances the likelihood of dispersal?                           | No             | No adaptations.                                                                                                                                                                                                                                                                                | Very high |
| 38                              | 7.04 | Is natural dispersal of the taxon likely to occur as eggs (for animals) or as propagules (for plants: seeds, spores) in the RA area?                                                      | No             | Even if spawning, eggs are deposited in deep part of lakes (Kottelat & Freyhof 2007).                                                                                                                                                                                                          | High      |
| 39                              | 7.05 | Is natural dispersal of the taxon likely to occur as larvae/juveniles (for animals) or as fragments/seedlings (for plants) in the RA area?                                                | No             | No spawning expected.                                                                                                                                                                                                                                                                          | Low       |
| 40                              | 7.06 | Are older life stages of the taxon likely to migrate in the RA area for reproduction?                                                                                                     | No             | No spawning expected.                                                                                                                                                                                                                                                                          | Low       |
| 41                              | 7.07 | Are propagules or eggs of the taxon likely to be dispersed in the RA area by other animals?                                                                                               | No             | Even if spawning, eggs are deposited in deep part of lakes (Kottelat & Freyhof 2007).                                                                                                                                                                                                          | High      |
| 42                              | 7.08 | Is dispersal of the taxon along any of the vectors/pathways mentioned in the previous seven questions (35–41; i.e. both unintentional or intentional) likely to be                        | Yes            | Introductions, escapes.                                                                                                                                                                                                                                                                        | High      |
| 43                              | 7.09 | Is dispersal of the taxon density dependent?                                                                                                                                              | No             | Not documented.                                                                                                                                                                                                                                                                                | Low       |
| <b>8. Tolerance attributes</b>  |      |                                                                                                                                                                                           |                |                                                                                                                                                                                                                                                                                                |           |
| 44                              | 8.01 | Is the taxon able to withstand being out of water for extended periods (e.g. minimum of one or more hours) at some stage of its life cycle?                                               | No             | Not likely for any Salmonidae species.                                                                                                                                                                                                                                                         | High      |
| 45                              | 8.02 | Is the taxon tolerant of a wide range of water quality conditions relevant to that taxon? [In the Justification field, indicate the relevant water quality variable(s) being considered.] | No             | Inhabits pristine Alpine lakes, very sensitive to eutrophication (Freyhof, J. & Kottelat, M. 2008. <i>Salvelinus umbla</i> . The IUCN Red List of Threatened Species 2008: e.T135426A4127943. https://dx.doi.org/10.2305/IUCN.UK.2008.RLTS.T135426A4127943.en. Downloaded on 07 May 2020.).    | Very high |
| 46                              | 8.03 | Can the taxon be controlled or eradicated in the wild with chemical, biological, or other agents/means?                                                                                   | No             | Not allowed                                                                                                                                                                                                                                                                                    | Very high |

|                          |      |                                                                                                                                                              |           |                                                                                                                                                                                                                                                                                                                                                                                                                                                                                                                                                                                                                                                                                                                                                                                                                                                                                                                                             |           |
|--------------------------|------|--------------------------------------------------------------------------------------------------------------------------------------------------------------|-----------|---------------------------------------------------------------------------------------------------------------------------------------------------------------------------------------------------------------------------------------------------------------------------------------------------------------------------------------------------------------------------------------------------------------------------------------------------------------------------------------------------------------------------------------------------------------------------------------------------------------------------------------------------------------------------------------------------------------------------------------------------------------------------------------------------------------------------------------------------------------------------------------------------------------------------------------------|-----------|
| 47                       | 8.04 | Is the taxon likely to tolerate or benefit from environmental/human disturbance?                                                                             | No        | Freyhof, J. & Kottelat, M. 2008. <i>Salvelinus umbla</i> . The IUCN Red List of Threatened Species 2008: e.T135426A4127943. <a href="https://dx.doi.org/10.2305/IUCN.UK.2008.RLTS.T135426A4127943.en">https://dx.doi.org/10.2305/IUCN.UK.2008.RLTS.T135426A4127943.en</a> . Downloaded on 07 May 2020.                                                                                                                                                                                                                                                                                                                                                                                                                                                                                                                                                                                                                                      | Very high |
| 48                       | 8.05 | Is the taxon able to tolerate salinity levels that are higher or lower than those found in its usual environment?                                            | No        | Only landlocked populations in lakes (Freyhof, J. & Kottelat, M. 2008. <i>Salvelinus umbla</i> . The IUCN Red List of Threatened Species 2008: e.T135426A4127943. <a href="https://dx.doi.org/10.2305/IUCN.UK.2008.RLTS.T135426A4127943.en">https://dx.doi.org/10.2305/IUCN.UK.2008.RLTS.T135426A4127943.en</a> . Downloaded on 07 May 2020.).                                                                                                                                                                                                                                                                                                                                                                                                                                                                                                                                                                                              | Medium    |
| 49                       | 8.06 | Are there effective natural enemies (predators) of the taxon present in the RA                                                                               | Yes       | Probably otters and piscivorous birds (personal opinion).                                                                                                                                                                                                                                                                                                                                                                                                                                                                                                                                                                                                                                                                                                                                                                                                                                                                                   | Medium    |
| <b>C. Climate change</b> |      |                                                                                                                                                              |           |                                                                                                                                                                                                                                                                                                                                                                                                                                                                                                                                                                                                                                                                                                                                                                                                                                                                                                                                             |           |
| <b>9. Climate change</b> |      |                                                                                                                                                              |           |                                                                                                                                                                                                                                                                                                                                                                                                                                                                                                                                                                                                                                                                                                                                                                                                                                                                                                                                             |           |
| 50                       | 9.01 | Under the predicted future climatic conditions, are the risks of entry into the RA area posed by the taxon likely to increase, decrease or not change?       | No change | Only pathway is human introduction, not influenced by climate.                                                                                                                                                                                                                                                                                                                                                                                                                                                                                                                                                                                                                                                                                                                                                                                                                                                                              | Low       |
| 51                       | 9.02 | Under the predicted future climatic conditions, are the risks of establishment posed by the taxon likely to increase, decrease or not change?                | Decrease  | Restricted to cold water habitats (Aparicio, E., 2015. First record of a self-sustaining population of Alpine charr <i>Salvelinus umbla</i> (Linnaeus, 1758) (Actinopterygii, Salmonidae) in Spain. <i>Graellsia</i> . doi:10.3989/graelisia.2015.v71.147). Jonsson, T., Setzer, M., 2015. A freshwater predator hit twice by the effects of warming across trophic levels. <i>Nature Communications</i> . doi:10.1038/ncomms6992. Suitable habitats will decrease (Less impact on zooplankton communities under predicted less favourable conditions for coldwater species (Lower impact i unfavourable conditions for cold-water species (COMTE, L., BUISSON, L., DAUFRESNE, M. and GRENOUILLET, G. (2013), Climate-induced changes in the distribution of freshwater fish: observed and predicted trends. <i>Freshwater Biology</i> , 58: 625-639. <a href="https://doi.org/10.1111/fwb.12081">https://doi.org/10.1111/fwb.12081</a> )). | High      |
| 52                       | 9.03 | Under the predicted future climatic conditions, are the risks of dispersal within the RA area posed by the taxon likely to increase, decrease or not change? | Decrease  | Restricted to cold water habitats (Aparicio, E., 2015. First record of a self-sustaining population of Alpine charr <i>Salvelinus umbla</i> (Linnaeus, 1758) (Actinopterygii, Salmonidae) in Spain. <i>Graellsia</i> . doi:10.3989/graelisia.2015.v71.147). Jonsson, T., Setzer, M., 2015. A freshwater predator hit twice by the effects of warming across trophic levels. <i>Nature Communications</i> . doi:10.1038/ncomms6992. Suitable habitats will decrease (Less impact on zooplankton communities under predicted less favourable conditions for coldwater species (Lower impact i unfavourable conditions for cold-water species (COMTE, L., BUISSON, L., DAUFRESNE, M. and GRENOUILLET, G. (2013), Climate-induced changes in the distribution of freshwater fish: observed and predicted trends. <i>Freshwater Biology</i> , 58: 625-639. <a href="https://doi.org/10.1111/fwb.12081">https://doi.org/10.1111/fwb.12081</a> )). | High      |
| 53                       | 9.04 | Under the predicted future climatic conditions, what is the likely magnitude of future potential impacts on biodiversity and/or ecological integrity/status? | Lower     | Restricted to cold water habitats (Aparicio, E., 2015. First record of a self-sustaining population of Alpine charr <i>Salvelinus umbla</i> (Linnaeus, 1758) (Actinopterygii, Salmonidae) in Spain. <i>Graellsia</i> . doi:10.3989/graelisia.2015.v71.147). Jonsson, T., Setzer, M., 2015. A freshwater predator hit twice by the effects of warming across trophic levels. <i>Nature Communications</i> . doi:10.1038/ncomms6992. <del>Decreased possible impact on plankton</del>                                                                                                                                                                                                                                                                                                                                                                                                                                                         | Low       |
| 54                       | 9.05 | Under the predicted future climatic conditions, what is the likely magnitude of future potential impacts on ecosystem structure and/or function?             | Lower     | Restricted to cold water habitats (Aparicio, E., 2015. First record of a self-sustaining population of Alpine charr <i>Salvelinus umbla</i> (Linnaeus, 1758) (Actinopterygii, Salmonidae) in Spain. <i>Graellsia</i> . doi:10.3989/graelisia.2015.v71.147). Jonsson, T., Setzer, M., 2015. A freshwater predator hit twice by the effects of warming across trophic levels. <i>Nature Communications</i> . doi:10.1038/ncomms6992. <del>Decreased possible impact on plankton</del>                                                                                                                                                                                                                                                                                                                                                                                                                                                         | Low       |
| 55                       | 9.06 | Under the predicted future climatic conditions, what is the likely magnitude of future potential impacts on ecosystem services/socio-economic factors?       | No change | So far no adverse impact, no change expected.                                                                                                                                                                                                                                                                                                                                                                                                                                                                                                                                                                                                                                                                                                                                                                                                                                                                                               | Medium    |

| Statistics                                     |             |
|------------------------------------------------|-------------|
| Scores                                         |             |
| <b>BRA</b>                                     | <b>6.0</b>  |
| <b>BRA Outcome</b>                             | <b>-</b>    |
| <b>BRA+CCA</b>                                 | <b>-2.0</b> |
| <b>BRA+CCA Outcome</b>                         | <b>-</b>    |
| Score partition                                |             |
| <b>A. Biogeography/Historical</b>              | <b>5.0</b>  |
| 1. Domestication/Cultivation                   | 4.0         |
| 2. Climate, distribution and introduction risk | 0.0         |
| 3. Invasive elsewhere                          | 1.0         |
| <b>B. Biology/Ecology</b>                      | <b>1.0</b>  |
| 4. Undesirable (or persistence) traits         | 4.0         |
| 5. Resource exploitation                       | 5.0         |
| 6. Reproduction                                | -2.0        |
| 7. Dispersal mechanisms                        | -2.0        |
| 8. Tolerance attributes                        | -4.0        |
| <b>C. Climate change</b>                       | <b>-8.0</b> |
| 9. Climate change                              | -8.0        |
| Answered Questions                             |             |
| <b>Total</b>                                   | <b>55</b>   |
| <b>A. Biogeography/Historical</b>              | <b>13</b>   |
| 1. Domestication/Cultivation                   | 3           |
| 2. Climate, distribution and introduction risk | 5           |
| 3. Invasive elsewhere                          | 5           |
| <b>B. Biology/Ecology</b>                      | <b>36</b>   |
| 4. Undesirable (or persistence) traits         | 12          |

|                                              |           |
|----------------------------------------------|-----------|
| 5. Resource exploitation                     | 2         |
| 6. Reproduction                              | 7         |
| 7. Dispersal mechanisms                      | 9         |
| 8. Tolerance attributes                      | 6         |
| <b>C. Climate change</b>                     | <b>6</b>  |
| 9. Climate change                            | 6         |
| <b>Sectors affected</b>                      |           |
| <b>Commercial</b>                            | <b>5</b>  |
| <b>Environmental</b>                         | <b>3</b>  |
| <b>Species or population nuisance traits</b> | <b>-7</b> |

|                   |                |             |
|-------------------|----------------|-------------|
| <b>Thresholds</b> |                |             |
|                   | <b>BRA</b>     | -           |
|                   | <b>BRA+CCA</b> | -           |
| <b>Confidence</b> |                |             |
|                   | <b>BRA+CCA</b> | <b>0.65</b> |
|                   | <b>BRA</b>     | <b>0.67</b> |
|                   | <b>CCA</b>     | <b>0.46</b> |

|                            |  |
|----------------------------|--|
| <b>Date and Time</b>       |  |
| <b>19/05/2021 11:39:58</b> |  |

## AS-ISK v2

| Taxon and Assessor details         |                                         |
|------------------------------------|-----------------------------------------|
| Category                           | Fishes and Lampreys (freshwater)        |
| Taxon name                         | <i>Salvelinus umbla</i>                 |
| Common name                        | Alpine charr                            |
| Assessor                           | Tamara Kanjuh                           |
| Risk screening context             |                                         |
| Reason and socio-economic benefits |                                         |
| Risk assessment area               | Danube & Adriatic basins BA, HR, ME, RS |
| Taxonomy                           |                                         |
| Native range                       |                                         |
| Introduced range                   |                                         |
| URL                                |                                         |

|                                                |      | Response                                                                                                                                                                | Justification (references and/or other information) | Confidence                                                |        |
|------------------------------------------------|------|-------------------------------------------------------------------------------------------------------------------------------------------------------------------------|-----------------------------------------------------|-----------------------------------------------------------|--------|
| A. Biogeography/Historical                     |      |                                                                                                                                                                         |                                                     |                                                           |        |
| 1. Domestication/Cultivation                   |      |                                                                                                                                                                         |                                                     |                                                           |        |
| 1                                              | 1.01 | Has the taxon been the subject of domestication (or cultivation) for at least 20 generations?                                                                           | Yes                                                 | cabi.org                                                  | High   |
| 2                                              | 1.02 | Is the taxon harvested in the wild and likely to be sold or used in its live form?                                                                                      | Yes                                                 | cabi.org                                                  | High   |
| 3                                              | 1.03 | Does the taxon have invasive races, varieties, sub-taxa or congeners?                                                                                                   | No                                                  | No information found.                                     | Low    |
| 2. Climate, distribution and introduction risk |      |                                                                                                                                                                         |                                                     |                                                           |        |
| 4                                              | 2.01 | How similar are the climatic conditions of the Risk Assessment (RA) area and the taxon's native range?                                                                  | Medium                                              | Dfa, Dfb (Köppen–Geiger climate classification system)    | High   |
| 5                                              | 2.02 | What is the quality of the climate matching data?                                                                                                                       | High                                                | Köppen–Geiger climate classification system               | High   |
| 6                                              | 2.03 | Is the taxon already present outside of captivity in the RA area?                                                                                                       | Yes                                                 | Radočaj et al. (2021)                                     | High   |
| 7                                              | 2.04 | How many potential vectors could the taxon use to enter in the RA area?                                                                                                 | One                                                 | Intentional stocking.                                     | Medium |
| 8                                              | 2.05 | Is the taxon currently found in close proximity to, and likely to enter into, the RA area in the near future (e.g. unintentional and intentional introductions)?        | Yes                                                 | Radočaj et al. (2021)                                     | High   |
| 3. Invasive elsewhere                          |      |                                                                                                                                                                         |                                                     |                                                           |        |
| 9                                              | 3.01 | Has the taxon become naturalised (established viable populations) outside its native range?                                                                             | Yes                                                 | Established populations (Simonović, 2001; Aparicio, 2015) | High   |
| 10                                             | 3.02 | In the taxon's introduced range, are there known adverse impacts to wild stocks or commercial taxa?                                                                     | Yes                                                 | Established populations (Simonović, 2001)                 | High   |
| 11                                             | 3.03 | In the taxon's introduced range, are there known adverse impacts to aquaculture?                                                                                        | No                                                  | Not known.                                                | Medium |
| 12                                             | 3.04 | In the taxon's introduced range, are there known adverse impacts to ecosystem?                                                                                          | No                                                  | Not known.                                                | Medium |
| 13                                             | 3.05 | In the taxon's introduced range, are there known adverse socio-economic impacts?                                                                                        | No                                                  | Not known.                                                | Medium |
| B. Biology/Ecology                             |      |                                                                                                                                                                         |                                                     |                                                           |        |
| 4. Undesirable (or persistence) traits         |      |                                                                                                                                                                         |                                                     |                                                           |        |
| 14                                             | 4.01 | Is it likely that the taxon will be poisonous or pose other risks to human health?                                                                                      | No                                                  | Harmless (FishBase)                                       | High   |
| 15                                             | 4.02 | Is it likely that the taxon will smother one or more native taxa (that are not threatened or protected)?                                                                | Yes                                                 | Established populations (Simonović, 2001)                 | High   |
| 16                                             | 4.03 | Are there any threatened or protected taxa that the non-native taxon would parasitise in the RA area?                                                                   | No                                                  | The taxon is not a parasite.                              | High   |
| 17                                             | 4.04 | Is the taxon adaptable in terms of climatic and other environmental conditions, thus enhancing its potential persistence if it has invaded or could invade the RA area? | Yes                                                 | Established populations (Simonović, 2001)                 | Medium |
| 18                                             | 4.05 | Is the taxon likely to disrupt food-web structure/function in aquatic ecosystems if it has invaded or is likely to invade the RA area?                                  | Yes                                                 | Established populations (Simonović, 2001)                 | High   |
| 19                                             | 4.06 | Is the taxon likely to exert adverse impacts on ecosystem services in the RA area?                                                                                      | No                                                  | No information found.                                     | Medium |
| 20                                             | 4.07 | Is it likely that the taxon will host, and/or act as a vector for, recognised pests and infectious agents that are endemic in the RA area?                              | No                                                  | No information found.                                     | Medium |
| 21                                             | 4.08 | Is it likely that the taxon will host, and/or act as a vector for, recognised pests and infectious agents that are absent from (novel to) the RA area?                  | No                                                  | No information found.                                     | Medium |
| 22                                             | 4.09 | Is it likely that the taxon will achieve a body size that will make it more likely to be released from captivity?                                                       | No                                                  | No information found.                                     | Medium |
| 23                                             | 4.10 | Is the taxon capable of sustaining itself in a range of water velocity conditions (e.g. versatile in habitat use)?                                                      | Yes                                                 | Established populations (Simonović, 2001)                 | High   |
| 24                                             | 4.11 | Is it likely that the taxon's mode of existence (e.g. excretion of by-products) or behaviours (e.g. feeding) will reduce habitat quality for native taxa?               | Yes                                                 | Established populations (Simonović, 2001)                 | High   |
| 25                                             | 4.12 | Is the taxon likely to maintain a viable population even when present in low densities (or persisting in adverse conditions by way of a dormant form)?                  | Yes                                                 | Established populations (Simonović, 2001)                 | High   |

|                          |      |                                                                                                                                                                              |          |                                                    |        |
|--------------------------|------|------------------------------------------------------------------------------------------------------------------------------------------------------------------------------|----------|----------------------------------------------------|--------|
| 5. Resource exploitation |      |                                                                                                                                                                              |          |                                                    |        |
| 26                       | 5.01 | Is the taxon likely to consume threatened or protected native taxa in the RA area?                                                                                           | Yes      | Established populations (Simonović, 2001)          | High   |
| 27                       | 5.02 | Is the taxon likely to sequester food resources (including nutrients) to the detriment of native taxa in the RA area?                                                        | No       | No information found.                              | Medium |
| 6. Reproduction          |      |                                                                                                                                                                              |          |                                                    |        |
| 28                       | 6.01 | Is the taxon likely to exhibit parental care and/or to reduce age-at-maturity in response to environmental conditions?                                                       | No       | Kottelat&Freyhof (2007)                            | High   |
| 29                       | 6.02 | Is the taxon likely to produce viable gametes or propagules (in the RA area)?                                                                                                | Yes      | Established populations (Simonović, 2001)          | High   |
| 30                       | 6.03 | Is the taxon likely to hybridise naturally with native taxa?                                                                                                                 | No       | Kottelat&Freyhof (2007)                            | High   |
| 31                       | 6.04 | Is the taxon likely to be hermaphroditic or to display asexual reproduction?                                                                                                 | No       | Kottelat&Freyhof (2007)                            | High   |
| 32                       | 6.05 | Is the taxon dependent on the presence of another taxon (or specific habitat features) to complete its life cycle?                                                           | No       | Kottelat&Freyhof (2007)                            | High   |
| 33                       | 6.06 | Is the taxon known (or likely) to produce a large number of propagules or offspring within a short time span (e.g. < 1 year)?                                                | Yes      | Kottelat&Freyhof (2007)                            | High   |
| 34                       | 6.07 | How many time units (days, months, years) does the taxon require to reach the age-at-first-reproduction?                                                                     | 5        | Similar to other salmonids.                        | Medium |
| 7. Dispersal mechanisms  |      |                                                                                                                                                                              |          |                                                    |        |
| 35                       | 7.01 | How many potential internal vectors/pathways could the taxon use to disperse within the RA area (with suitable vectors)?                                                     | One      | Intentional stocking.                              | High   |
| 36                       | 7.02 | Will any of these vectors/pathways bring the taxon in close proximity to one or more protected areas (e.g. MCZ, MPA, SSSI)?                                                  | Yes      | Intentional stocking.                              | High   |
| 37                       | 7.03 | Does the taxon have a means of actively attaching itself to hard substrata (e.g. ship hulls, pilings, buoys) such that it enhances the likelihood of dispersal?              | No       | Kottelat&Freyhof (2007)                            | High   |
| 38                       | 7.04 | Is natural dispersal of the taxon likely to occur as eggs (for animals) or as propagules (for plants: seeds, spores) in the RA area?                                         | No       | Not known.                                         | High   |
| 39                       | 7.05 | Is natural dispersal of the taxon likely to occur as larvae/juveniles (for animals) or as fragments/seedlings (for plants) in the RA area?                                   | Yes      | Could disperse as juveniles.                       | Medium |
| 40                       | 7.06 | Are older life stages of the taxon likely to migrate in the RA area for reproduction?                                                                                        | No       | Kottelat&Freyhof (2007)                            | High   |
| 41                       | 7.07 | Are propagules or eggs of the taxon likely to be dispersed in the RA area by other animals?                                                                                  | No       | Kottelat&Feeyhof (2007)                            | High   |
| 42                       | 7.08 | Is dispersal of the taxon along any of the vectors/pathways mentioned in the previous seven questions (35–41; i.e. both unintentional or intentional) likely to be           | Yes      | Intentional stocking.                              | High   |
| 43                       | 7.09 | Is dispersal of the taxon density dependent?                                                                                                                                 | No       | No information found.                              | Medium |
| 8. Tolerance attributes  |      |                                                                                                                                                                              |          |                                                    |        |
| 44                       | 8.01 | Is the taxon able to withstand being out of water for extended periods (e.g. minimum of one or more hours) at some stage of its life cycle?                                  | No       | Kottelat&Freyhof (2007)                            | High   |
| 45                       | 8.02 | Is the taxon tolerant of a wide range of water quality conditions relevant to that taxon? [In the Justification field, indicate the relevant water quality variable(s) being | No       | The taxon is sensitive to enviromental conditions. | Medium |
| 46                       | 8.03 | Can the taxon be controlled or eradicated in the wild with chemical, biological, or other agents/means?                                                                      | No       | No information found.                              | Medium |
| 47                       | 8.04 | Is the taxon likely to tolerate or benefit from environmental/human disturbance?                                                                                             | No       | The taxon is sensitive to enviromental conditions. | Medium |
| 48                       | 8.05 | Is the taxon able to tolerate salinity levels that are higher or lower than those found in its usual environment?                                                            | No       | The taxon is sensitive to enviromental conditions. | Medium |
| 49                       | 8.06 | Are there effective natural enemies (predators) of the taxon present in the RA                                                                                               | Yes      | As other salmonids.                                | High   |
| C. Climate change        |      |                                                                                                                                                                              |          |                                                    |        |
| 9. Climate change        |      |                                                                                                                                                                              |          |                                                    |        |
| 50                       | 9.01 | Under the predicted future climatic conditions, are the risks of entry into the RA area posed by the taxon likely to increase, decrease or not change?                       | Decrease | The taxon is sensitive to enviromental conditions. | Medium |
| 51                       | 9.02 | Under the predicted future climatic conditions, are the risks of establishment posed by the taxon likely to increase, decrease or not change?                                | Decrease | The taxon is sensitive to enviromental conditions. | Medium |
| 52                       | 9.03 | Under the predicted future climatic conditions, are the risks of dispersal within the RA area posed by the taxon likely to increase, decrease or not change?                 | Decrease | The taxon is sensitive to enviromental conditions. | Medium |
| 53                       | 9.04 | Under the predicted future climatic conditions, what is the likely magnitude of future potential impacts on biodiversity and/or ecological integrity/status?                 | Lower    | The taxon is sensitive to enviromental conditions. | Medium |



|    |      |                                                                                                                                                        |       |                                                     |        |
|----|------|--------------------------------------------------------------------------------------------------------------------------------------------------------|-------|-----------------------------------------------------|--------|
| 54 | 9.05 | Under the predicted future climatic conditions, what is the likely magnitude of future potential impacts on ecosystem structure and/or function?       | Lower | The taxon is sensitive to environmental conditions. | Medium |
| 55 | 9.06 | Under the predicted future climatic conditions, what is the likely magnitude of future potential impacts on ecosystem services/socio-economic factors? | Lower | The taxon is sensitive to environmental conditions. | Medium |

| Statistics                                     |              |
|------------------------------------------------|--------------|
| Scores                                         |              |
| <b>BRA</b>                                     | <b>12.0</b>  |
| <b>BRA Outcome</b>                             | <b>-</b>     |
| <b>BRA+CCA</b>                                 | <b>0.0</b>   |
| <b>BRA+CCA Outcome</b>                         | <b>-</b>     |
| Score partition                                |              |
| <b>A. Biogeography/Historical</b>              | <b>6.0</b>   |
| 1. Domestication/Cultivation                   | 2.0          |
| 2. Climate, distribution and introduction risk | 1.0          |
| 3. Invasive elsewhere                          | 3.0          |
| <b>B. Biology/Ecology</b>                      | <b>6.0</b>   |
| 4. Undesirable (or persistence) traits         | 6.0          |
| 5. Resource exploitation                       | 5.0          |
| 6. Reproduction                                | 0.0          |
| 7. Dispersal mechanisms                        | -1.0         |
| 8. Tolerance attributes                        | -4.0         |
| <b>C. Climate change</b>                       | <b>-12.0</b> |
| 9. Climate change                              | -12.0        |
| Answered Questions                             |              |
| <b>Total</b>                                   | <b>55</b>    |
| <b>A. Biogeography/Historical</b>              | <b>13</b>    |
| 1. Domestication/Cultivation                   | 3            |
| 2. Climate, distribution and introduction risk | 5            |
| 3. Invasive elsewhere                          | 5            |
| <b>B. Biology/Ecology</b>                      | <b>36</b>    |
| 4. Undesirable (or persistence) traits         | 12           |
| 5. Resource exploitation                       | 2            |
| 6. Reproduction                                | 7            |
| 7. Dispersal mechanisms                        | 9            |
| 8. Tolerance attributes                        | 6            |
| <b>C. Climate change</b>                       | <b>6</b>     |
| 9. Climate change                              | 6            |
| Sectors affected                               |              |
| <b>Commercial</b>                              | <b>5</b>     |
| <b>Environmental</b>                           | <b>4</b>     |
| <b>Species or population nuisance traits</b>   | <b>-6</b>    |

| Thresholds     |             |
|----------------|-------------|
| <b>BRA</b>     | <b>-</b>    |
| <b>BRA+CCA</b> | <b>-</b>    |
| Confidence     |             |
| <b>BRA+CCA</b> | <b>0.64</b> |
| <b>BRA</b>     | <b>0.65</b> |
| <b>CCA</b>     | <b>0.50</b> |

| Date and Time       |  |
|---------------------|--|
| 03/06/2021 11:46:49 |  |

## AS-ISK v2

| Taxon and Assessor details         |                                         |
|------------------------------------|-----------------------------------------|
| Category                           | Fishes and Lampreys (freshwater)        |
| Taxon name                         | <i>Salvelinus umbla</i>                 |
| Common name                        | Alpine charr                            |
| Assessor                           | Tena Radocaj                            |
| Risk screening context             |                                         |
| Reason and socio-economic benefits |                                         |
| Risk assessment area               | Danube & Adriatic basins BA, HR, ME, RS |
| Taxonomy                           |                                         |
| Native range                       |                                         |
| Introduced range                   |                                         |
| URL                                |                                         |

|                                                |      | Response                                                                                                                                                                | Justification (references and/or other information) | Confidence                                                                                                                                                                                                                                                                                                                                                                                                            |           |
|------------------------------------------------|------|-------------------------------------------------------------------------------------------------------------------------------------------------------------------------|-----------------------------------------------------|-----------------------------------------------------------------------------------------------------------------------------------------------------------------------------------------------------------------------------------------------------------------------------------------------------------------------------------------------------------------------------------------------------------------------|-----------|
| A. Biogeography/ Historical                    |      |                                                                                                                                                                         |                                                     |                                                                                                                                                                                                                                                                                                                                                                                                                       |           |
| 1. Domestication/Cultivation                   |      |                                                                                                                                                                         |                                                     |                                                                                                                                                                                                                                                                                                                                                                                                                       |           |
| 1                                              | 1.01 | Has the taxon been the subject of domestication (or cultivation) for at least 20 generations?                                                                           | Yes                                                 | In Switzerland, Alpine Char supports important recreational and commercial fisheries and char are economically and culturally important in mountainous areas of France. (Lobón-Cerviá, J., Esteve, M., Berrebi, P., Duchi, A., Lorenzoni, M., & Young, K. A. (2019). Trout and char of central and Southern Europe and Northern Africa. Trout and char of the world. Bethesda, Maryland: American Fisheries Society.) | Medium    |
| 2                                              | 1.02 | Is the taxon harvested in the wild and likely to be sold or used in its live form?                                                                                      | Yes                                                 | In Switzerland, Alpine Char supports important recreational and commercial fisheries and it is a popular food in homes and restaurants. (Lobón-Cerviá, J., Esteve, M., Berrebi, P., Duchi, A., Lorenzoni, M., & Young, K. A. (2019). Trout and char of central and Southern Europe and Northern Africa. Trout and char of the world. Bethesda, Maryland: American Fisheries Society.)                                 | High      |
| 3                                              | 1.03 | Does the taxon have invasive races, varieties, sub-taxa or congeners?                                                                                                   | No                                                  | No                                                                                                                                                                                                                                                                                                                                                                                                                    | Low       |
| 2. Climate, distribution and introduction risk |      |                                                                                                                                                                         |                                                     |                                                                                                                                                                                                                                                                                                                                                                                                                       |           |
| 4                                              | 2.01 | How similar are the climatic conditions of the Risk Assessment (RA) area and the taxon's native range?                                                                  | High                                                | The similarity between climatic conditions RA area and native range is high. I use climatch.                                                                                                                                                                                                                                                                                                                          | Medium    |
| 5                                              | 2.02 | What is the quality of the climate matching data?                                                                                                                       | Medium                                              | The quality of the climate matching data is medium.                                                                                                                                                                                                                                                                                                                                                                   | Medium    |
| 6                                              | 2.03 | Is the taxon already present outside of captivity in the RA area?                                                                                                       | No                                                  | Salvelinus umbla is not present outside of captivity in the RA area.                                                                                                                                                                                                                                                                                                                                                  | Very high |
| 7                                              | 2.04 | How many potential vectors could the taxon use to enter in the RA area?                                                                                                 | One                                                 | Sport fishing (Povž, M. (2017). Non-native freshwater fishes in Slovenia. Acta Zoologica Bulgarica, 9, 105-110.)                                                                                                                                                                                                                                                                                                      | Medium    |
| 8                                              | 2.05 | Is the taxon currently found in close proximity to, and likely to enter into, the RA area in the near future (e.g. unintentional and intentional introductions)?        | Yes                                                 | It established in Slovenia (Povž, M. (2017). Non-native freshwater fishes in Slovenia. Acta Zoologica Bulgarica, 9, 105-110.)                                                                                                                                                                                                                                                                                         | Medium    |
| 3. Invasive elsewhere                          |      |                                                                                                                                                                         |                                                     |                                                                                                                                                                                                                                                                                                                                                                                                                       |           |
| 9                                              | 3.01 | Has the taxon become naturalised (established viable populations) outside its native range?                                                                             | Yes                                                 | Spain (Aparicio, E. (2015). First record of a self-sustaining population of Alpine charr Salvelinus umbla (Linnaeus, 1758)(Actinopterygii, Salmonidae) in Spain. Graellsia, 71(2), 1758-1760.)                                                                                                                                                                                                                        | Low       |
| 10                                             | 3.02 | In the taxon's introduced range, are there known adverse impacts to wild stocks or commercial taxa?                                                                     | Yes                                                 | Schabetsberger, R., Luger, M. S., Drozdowski, G., & Jagsch, A. (2009). Only the small survive: monitoring long-term changes in the zooplankton community of an Alpine lake after fish introduction. Biological Invasions, 11(6), 1335-1345.)                                                                                                                                                                          | Low       |
| 11                                             | 3.03 | In the taxon's introduced range, are there known adverse impacts to aquaculture?                                                                                        | No                                                  | no data available                                                                                                                                                                                                                                                                                                                                                                                                     | Low       |
| 12                                             | 3.04 | In the taxon's introduced range, are there known adverse impacts to ecosystem                                                                                           | No                                                  | no data available                                                                                                                                                                                                                                                                                                                                                                                                     | Low       |
| 13                                             | 3.05 | In the taxon's introduced range, are there known adverse socio-economic impacts?                                                                                        | No                                                  | no data available                                                                                                                                                                                                                                                                                                                                                                                                     | Low       |
| B. Biology/ Ecology                            |      |                                                                                                                                                                         |                                                     |                                                                                                                                                                                                                                                                                                                                                                                                                       |           |
| 4. Undesirable (or persistence) traits         |      |                                                                                                                                                                         |                                                     |                                                                                                                                                                                                                                                                                                                                                                                                                       |           |
| 14                                             | 4.01 | Is it likely that the taxon will be poisonous or pose other risks to human health?                                                                                      | No                                                  | Salvelinus umbla is harmless (Fishbase)                                                                                                                                                                                                                                                                                                                                                                               | Medium    |
| 15                                             | 4.02 | Is it likely that the taxon will smother one or more native taxa (that are not threatened or protected)?                                                                | Yes                                                 | Nine years after stocking of fertile charr, the two calanoids had virtually disappeared, and Daphnia rosea had notably declined in abundance. (Schabetsberger, R., Luger, M. S., Drozdowski, G., & Jagsch, A. (2009). Only the small survive: monitoring long-term changes in the zooplankton community of an Alpine lake after fish introduction. Biological Invasions, 11(6), 1335-1345.)                           | Low       |
| 16                                             | 4.03 | Are there any threatened or protected taxa that the non-native taxon would parasitise in the RA area?                                                                   | No                                                  | No                                                                                                                                                                                                                                                                                                                                                                                                                    | Low       |
| 17                                             | 4.04 | Is the taxon adaptable in terms of climatic and other environmental conditions, thus enhancing its potential persistence if it has invaded or could invade the RA area? | No                                                  | Although is similarity climatic conditions natural range and RA area is high, this species won't survive in RA area because of high temperatures in RA area. S. umbla lives in high altitude lakes and deep lakes in glacial valleys.                                                                                                                                                                                 | Medium    |
| 18                                             | 4.05 | Is the taxon likely to disrupt food-web structure/function in aquatic ecosystems if it has invaded or is likely to invade the RA area?                                  | No                                                  | S. umbla does not disrupt food-web structure or function in the aquatic ecosystem in the RA area.                                                                                                                                                                                                                                                                                                                     | Low       |
| 19                                             | 4.06 | Is the taxon likely to exert adverse impacts on ecosystem services in the RA area?                                                                                      | No                                                  | The taxon does not have an adverse impact on ecosystem services in the RA area.                                                                                                                                                                                                                                                                                                                                       | Low       |
| 20                                             | 4.07 | Is it likely that the taxon will host, and/or act as a vector for, recognised pests and infectious agents that are endemic in the RA area?                              | Yes                                                 | Yes, the taxon may be a host or vector of known pests and infectious agents endemic to RA area. Because in every area exist infectious agents and pests.                                                                                                                                                                                                                                                              | Low       |
| 21                                             | 4.08 | Is it likely that the taxon will host, and/or act as a vector for, recognised pests and infectious agents that are absent from (novel to) the RA area?                  | Yes                                                 | Achleitner, D., Gassner, H., & Schabetsberger, R. (2009). 'Global worming': first record of an epidemic of Triaenophorus crassus in a population of Arctic charr Salvelinus umbla. Journal of Fish Biology, 74(4), 961-966.                                                                                                                                                                                           | Medium    |

|                                 |      |                                                                                                                                                                              |                |                                                                                                                                                                                                                                                                                                                                                                                                                                 |           |
|---------------------------------|------|------------------------------------------------------------------------------------------------------------------------------------------------------------------------------|----------------|---------------------------------------------------------------------------------------------------------------------------------------------------------------------------------------------------------------------------------------------------------------------------------------------------------------------------------------------------------------------------------------------------------------------------------|-----------|
| 22                              | 4.09 | Is it likely that the taxon will achieve a body size that will make it more likely to be released from captivity?                                                            | Yes            | Max length : 75.0 cm SL (Fishbase)                                                                                                                                                                                                                                                                                                                                                                                              | Medium    |
| 23                              | 4.10 | Is the taxon capable of sustaining itself in a range of water velocity conditions (e.g. versatile in habitat use)?                                                           | No             | S. umbla inhabit of northern lakes (Freyhof, J. & Kottelat, M. 2008. Salvelinus umbla. The IUCN Red List of Threatened Species 2008: e.T135426A4127943)                                                                                                                                                                                                                                                                         | Low       |
| 24                              | 4.11 | Is it likely that the taxon's mode of existence (e.g. excretion of by-products) or behaviours (e.g. feeding) will reduce habitat quality for native taxa?                    | No             | no data available                                                                                                                                                                                                                                                                                                                                                                                                               | Low       |
| 25                              | 4.12 | Is the taxon likely to maintain a viable population even when present in low densities (or persisting in adverse conditions by way of a dormant form)?                       | No             | no data available                                                                                                                                                                                                                                                                                                                                                                                                               | Low       |
| <b>5. Resource exploitation</b> |      |                                                                                                                                                                              |                |                                                                                                                                                                                                                                                                                                                                                                                                                                 |           |
| 26                              | 5.01 | Is the taxon likely to consume threatened or protected native taxa in the RA area?                                                                                           | Yes            | It is possible that it consume endangered and protected native taxa in the RA area. If there are protected taxa in the RA area will consume them, whether or not the taxon is endangered. Preys on crustaceans, insects and benthic fauna; a few individuals develop as large piscivores (Kottelat, M. and J. Freyhof, 2007. Handbook of European freshwater fishes. Publications Kottelat, Cornol and Freyhof, Berlin. 646 pp) | Low       |
| 27                              | 5.02 | Is the taxon likely to sequester food resources (including nutrients) to the detriment of native taxa in the RA area?                                                        | Not applicable | Not applicable                                                                                                                                                                                                                                                                                                                                                                                                                  | Very high |
| <b>6. Reproduction</b>          |      |                                                                                                                                                                              |                |                                                                                                                                                                                                                                                                                                                                                                                                                                 |           |
| 28                              | 6.01 | Is the taxon likely to exhibit parental care and/or to reduce age-at-maturity in response to environmental conditions?                                                       | No             | Personal opinion                                                                                                                                                                                                                                                                                                                                                                                                                | Low       |
| 29                              | 6.02 | Is the taxon likely to produce viable gametes or propagules (in the RA area)?                                                                                                | No             | The species is found in many Alpine and sub-Alpine lakes in France, Switzerland, Germany, Italy and Austria. (Freyhof, J. & Kottelat, M. 2008. Salvelinus umbla. The IUCN Red List of Threatened Species 2008: e.T135426A4127943)                                                                                                                                                                                               | Low       |
| 30                              | 6.03 | Is the taxon likely to hybridise naturally with native taxa?                                                                                                                 | No             | Kottelat, M. and J. Freyhof 2007 Handbook of European freshwater fishes. Publications Kottelat, Cornol, Switzerland.                                                                                                                                                                                                                                                                                                            | Low       |
| 31                              | 6.04 | Is the taxon likely to be hermaphroditic or to display asexual reproduction?                                                                                                 | No             | No                                                                                                                                                                                                                                                                                                                                                                                                                              | Low       |
| 32                              | 6.05 | Is the taxon dependent on the presence of another taxon (or specific habitat features) to complete its life cycle?                                                           | No             | Personal opinion                                                                                                                                                                                                                                                                                                                                                                                                                | Low       |
| 33                              | 6.06 | Is the taxon known (or likely) to produce a large number of propagules or offspring within a short time span (e.g. < 1 year)?                                                | Yes            | Personal opinion                                                                                                                                                                                                                                                                                                                                                                                                                | Low       |
| 34                              | 6.07 | How many time units (days, months, years) does the taxon require to reach the age-at-first-reproduction?                                                                     | 2              | Spawns for the first time at 2-3 years. (Kottelat, M. and J. Freyhof, 2007. Handbook of European freshwater fishes. Publications Kottelat, Cornol and Freyhof, Berlin. 646 pp.)                                                                                                                                                                                                                                                 | High      |
| <b>7. Dispersal mechanisms</b>  |      |                                                                                                                                                                              |                |                                                                                                                                                                                                                                                                                                                                                                                                                                 |           |
| 35                              | 7.01 | How many potential internal vectors/pathways could the taxon use to disperse within the RA area (with suitable vectors)?                                                     | >1             | Release for sport fishing, self-reproduction (Povž, M. (2017). Non-native freshwater fishes in Slovenia. Acta Zoologica Bulgarica, 9, 105-110.)                                                                                                                                                                                                                                                                                 | Medium    |
| 36                              | 7.02 | Will any of these vectors/pathways bring the taxon in close proximity to one or more protected areas (e.g. MCZ, MPA, SSSI)?                                                  | No             | No                                                                                                                                                                                                                                                                                                                                                                                                                              | Low       |
| 37                              | 7.03 | Does the taxon have a means of actively attaching itself to hard substrata (e.g. ship hulls, pilings, buoys) such that it enhances the likelihood of dispersal?              | No             | No adaptations.                                                                                                                                                                                                                                                                                                                                                                                                                 | Medium    |
| 38                              | 7.04 | Is natural dispersal of the taxon likely to occur as eggs (for animals) or as propagules (for plants: seeds, spores) in the RA area?                                         | No             | Freyhof, J. & Kottelat, M. 2008. Salvelinus umbla. The IUCN Red List of Threatened Species 2008: e.T135426A4127943                                                                                                                                                                                                                                                                                                              | Low       |
| 39                              | 7.05 | Is natural dispersal of the taxon likely to occur as larvae/juveniles (for animals) or as fragments/seedlings (for plants) in the RA area?                                   | No             | Freyhof, J. & Kottelat, M. 2008. Salvelinus umbla. The IUCN Red List of Threatened Species 2008: e.T135426A4127943)                                                                                                                                                                                                                                                                                                             | Low       |
| 40                              | 7.06 | Are older life stages of the taxon likely to migrate in the RA area for reproduction?                                                                                        | No             | Freyhof, J. & Kottelat, M. 2008. Salvelinus umbla. The IUCN Red List of Threatened Species 2008: e.T135426A4127943                                                                                                                                                                                                                                                                                                              | Low       |
| 41                              | 7.07 | Are propagules or eggs of the taxon likely to be dispersed in the RA area by other animals?                                                                                  | No             | Freyhof, J. & Kottelat, M. 2008. Salvelinus umbla. The IUCN Red List of Threatened Species 2008: e.T135426A4127943)                                                                                                                                                                                                                                                                                                             | Low       |
| 42                              | 7.08 | Is dispersal of the taxon along any of the vectors/pathways mentioned in the previous seven questions (35-41; i.e. both unintentional or intentional) likely to be           | Yes            | There is a possibility of a high rate of spread of taxa. Eg. if a fertilized individual enters a new area by any means of expansion.                                                                                                                                                                                                                                                                                            | Low       |
| 43                              | 7.09 | Is dispersal of the taxon density dependent?                                                                                                                                 | No             | Personal opinion                                                                                                                                                                                                                                                                                                                                                                                                                | Low       |
| <b>8. Tolerance attributes</b>  |      |                                                                                                                                                                              |                |                                                                                                                                                                                                                                                                                                                                                                                                                                 |           |
| 44                              | 8.01 | Is the taxon able to withstand being out of water for extended periods (e.g. minimum of one or more hours) at some stage of its life cycle?                                  | No             | Personal opinion                                                                                                                                                                                                                                                                                                                                                                                                                | Low       |
| 45                              | 8.02 | Is the taxon tolerant of a wide range of water quality conditions relevant to that taxon? [In the Justification field, indicate the relevant water quality variable(s) being | No             | Sensitive species (personal opinion)                                                                                                                                                                                                                                                                                                                                                                                            | Low       |
| 46                              | 8.03 | Can the taxon be controlled or eradicated in the wild with chemical, biological, or other agents/means?                                                                      | Not applicable | It is not regulated in Croatia                                                                                                                                                                                                                                                                                                                                                                                                  | Very high |
| 47                              | 8.04 | Is the taxon likely to tolerate or benefit from environmental/human disturbance?                                                                                             | No             | (Freyhof, J. & Kottelat, M. 2008. Salvelinus umbla. The IUCN Red List of Threatened Species 2008: e.T135426A4127943)                                                                                                                                                                                                                                                                                                            | Medium    |

|                          |      |                                                                                                                                                              |           |                                                                                                                                                                                                                                                                                                                                                                                                                                        |        |
|--------------------------|------|--------------------------------------------------------------------------------------------------------------------------------------------------------------|-----------|----------------------------------------------------------------------------------------------------------------------------------------------------------------------------------------------------------------------------------------------------------------------------------------------------------------------------------------------------------------------------------------------------------------------------------------|--------|
| 48                       | 8.05 | Is the taxon able to tolerate salinity levels that are higher or lower than those found in its usual environment?                                            | No        | Freshwater fish (Zavod za ribištvo Slovenije. BiosWeb. [online], Ljubljana, Zavod za ribištvo Slovenije, 2014, [Posodobljeno 21.05.2020], [Citirano 21.05.2020], Salvelinus umbla, <a href="http://www.biosweb.org/index.php?task=taxonsheet&amp;tid=2773">http://www.biosweb.org/index.php?task=taxonsheet&amp;tid=2773</a> , Dostopno na spletnem naslovu: < <a href="http://www.biosweb.org">www.biosweb.org</a> >, ISSN 2350-4757) | Medium |
| 49                       | 8.06 | Are there effective natural enemies (predators) of the taxon present in the RA                                                                               | Yes       | Otters, piscivorous birds..                                                                                                                                                                                                                                                                                                                                                                                                            | Medium |
| <b>C. Climate change</b> |      |                                                                                                                                                              |           |                                                                                                                                                                                                                                                                                                                                                                                                                                        |        |
| <b>9. Climate change</b> |      |                                                                                                                                                              |           |                                                                                                                                                                                                                                                                                                                                                                                                                                        |        |
| 50                       | 9.01 | Under the predicted future climatic conditions, are the risks of entry into the RA area posed by the taxon likely to increase, decrease or not change?       | No change | The risk of entering the RA area does not change. The risk may be increased due to recreational fishing (human impact), but not due to climate change.                                                                                                                                                                                                                                                                                 | Medium |
| 51                       | 9.02 | Under the predicted future climatic conditions, are the risks of establishment posed by the taxon likely to increase, decrease or not change?                | Decrease  | Jonsson, T., & Setzer, M. (2015). A freshwater predator hit twice by the effects of warming across trophic levels. Nature Communications, 6(1), 1-9.                                                                                                                                                                                                                                                                                   | Medium |
| 52                       | 9.03 | Under the predicted future climatic conditions, are the risks of dispersal within the RA area posed by the taxon likely to increase, decrease or not change? | Decrease  | Jonsson, T., & Setzer, M. (2015). A freshwater predator hit twice by the effects of warming across trophic levels. Nature Communications, 6(1), 1-9.                                                                                                                                                                                                                                                                                   | Medium |
| 53                       | 9.04 | Under the predicted future climatic conditions, what is the likely magnitude of future potential impacts on biodiversity and/or ecological integrity/status? | No change | Future potential impacts on biodiversity and ecological status will not change.                                                                                                                                                                                                                                                                                                                                                        | Medium |
| 54                       | 9.05 | Under the predicted future climatic conditions, what is the likely magnitude of future potential impacts on ecosystem structure and/or function?             | No change | The future potential impacts on ecosystem structure and function will not change.                                                                                                                                                                                                                                                                                                                                                      | Medium |
| 55                       | 9.06 | Under the predicted future climatic conditions, what is the likely magnitude of future potential impacts on ecosystem services/socio-economic factors?       | No change | The future potential impacts on ecosystem services and socio-economic factors will not change.                                                                                                                                                                                                                                                                                                                                         | Medium |

| Statistics                                     |      |
|------------------------------------------------|------|
| Scores                                         |      |
| BRA                                            | 9.0  |
| BRA Outcome                                    | -    |
| BRA+CCA                                        | 5.0  |
| BRA+CCA Outcome                                | -    |
| Score partition                                |      |
| A. Biogeography/Historical                     | 8.0  |
| 1. Domestication/Cultivation                   | 2.0  |
| 2. Climate, distribution and introduction risk | 0.0  |
| 3. Invasive elsewhere                          | 6.0  |
| B. Biology/Ecology                             | 1.0  |
| 4. Undesirable (or persistence) traits         | 3.0  |
| 5. Resource exploitation                       | 5.0  |
| 6. Reproduction                                | 0.0  |
| 7. Dispersal mechanisms                        | -3.0 |
| 8. Tolerance attributes                        | -4.0 |
| C. Climate change                              | -4.0 |
| 9. Climate change                              | -4.0 |
| Answered Questions                             |      |
| Total                                          | 55   |
| A. Biogeography/Historical                     | 13   |
| 1. Domestication/Cultivation                   | 3    |
| 2. Climate, distribution and introduction risk | 5    |
| 3. Invasive elsewhere                          | 5    |
| B. Biology/Ecology                             | 36   |
| 4. Undesirable (or persistence) traits         | 12   |
| 5. Resource exploitation                       | 2    |
| 6. Reproduction                                | 7    |
| 7. Dispersal mechanisms                        | 9    |
| 8. Tolerance attributes                        | 6    |
| C. Climate change                              | 6    |
| 9. Climate change                              | 6    |
| Sectors affected                               |      |
| Commercial                                     | 9    |
| Environmental                                  | 5    |
| Species or population nuisance traits          | -7   |

| Thresholds |      |
|------------|------|
| BRA        | -    |
| BRA+CCA    | -    |
| Confidence |      |
| BRA+CCA    | 0.40 |
| BRA        | 0.39 |
| CCA        | 0.50 |

| Date and Time       |
|---------------------|
| 21/05/2020 09:56:08 |

## AS-ISK v2

| Taxon and Assessor details         |                                         |
|------------------------------------|-----------------------------------------|
| Category                           | Fishes and Lampreys (freshwater)        |
| Taxon name                         | <i>Thymallus thymallus</i>              |
| Common name                        | grayling                                |
| Assessor                           | Ana Marić                               |
| Risk screening context             |                                         |
| Reason and socio-economic benefits |                                         |
| Risk assessment area               | Danube & Adriatic basins BA, HR, ME, RS |
| Taxonomy                           |                                         |
| Native range                       |                                         |
| Introduced range                   |                                         |
| URL                                |                                         |

|                                                |      | Response                                                                                                                                                                | Justification (references and/or other information) | Confidence                                                                                                                                                                                                                                                                                                                                                                                                                                                                                                           |           |
|------------------------------------------------|------|-------------------------------------------------------------------------------------------------------------------------------------------------------------------------|-----------------------------------------------------|----------------------------------------------------------------------------------------------------------------------------------------------------------------------------------------------------------------------------------------------------------------------------------------------------------------------------------------------------------------------------------------------------------------------------------------------------------------------------------------------------------------------|-----------|
| A. Biogeography/Historical                     |      |                                                                                                                                                                         |                                                     |                                                                                                                                                                                                                                                                                                                                                                                                                                                                                                                      |           |
| 1. Domestication/Cultivation                   |      |                                                                                                                                                                         |                                                     |                                                                                                                                                                                                                                                                                                                                                                                                                                                                                                                      |           |
| 1                                              | 1.01 | Has the taxon been the subject of domestication (or cultivation) for at least 20 generations?                                                                           | Yes                                                 | Distribution of <i>Pseudomonas fluorescens</i> and <i>Aeromonas hydrophila</i> Bacteria in a Recirculating Aquaculture System during Farming of European Grayling ( <i>Thymallus thymallus</i> L.) Broodstock Iwona Gołaś 1,* , Mariusz Szmyt , Jacek Potorski 1, Michał Łopata 3 Anna Gotkowska-Plachta 1 and Katarzyna Glińska-Lewczuk 2019. Yes for broodstock not easily Genetic characterisation of European grayling populations ( <i>Thymallus thymallus</i> ): Implications for conservation and management. | High      |
| 2                                              | 1.02 | Is the taxon harvested in the wild and likely to be sold or used in its live form?                                                                                      | Yes                                                 | Naredba o merama za očuvanje i zaštitu ribljeg fonda "Službeni glasnik RS", br. 104/2009 Na osnovu člana 21. stav 2. Zakona o zaštiti i održivom korišćenju ribljeg fonda                                                                                                                                                                                                                                                                                                                                            | Very high |
| 3                                              | 1.03 | Does the taxon have invasive races, varieties, sub-taxa or congeners?                                                                                                   | No                                                  | Genetic characterisation of European grayling populations ( <i>Thymallus thymallus</i> ): Implications for conservation and management. Bernhard Gum. 2006.                                                                                                                                                                                                                                                                                                                                                          | High      |
| 2. Climate, distribution and introduction risk |      |                                                                                                                                                                         |                                                     |                                                                                                                                                                                                                                                                                                                                                                                                                                                                                                                      |           |
| 4                                              | 2.01 | How similar are the climatic conditions of the Risk Assessment (RA) area and the taxon's native range?                                                                  | Medium                                              | <a href="https://climatch.cp1.agriculture.gov.au/climatch.jsp">https://climatch.cp1.agriculture.gov.au/climatch.jsp</a>                                                                                                                                                                                                                                                                                                                                                                                              | High      |
| 5                                              | 2.02 | What is the quality of the climate matching data?                                                                                                                       | Medium                                              | <a href="https://climatch.cp1.agriculture.gov.au/climatch.jsp">https://climatch.cp1.agriculture.gov.au/climatch.jsp</a>                                                                                                                                                                                                                                                                                                                                                                                              | High      |
| 6                                              | 2.03 | Is the taxon already present outside of captivity in the RA area?                                                                                                       | Yes                                                 | Genetic differentiation of European grayling ( <i>Thymallus thymallus</i> ) populations in Serbia, based on mitochondrial and nuclear DNA analyses Saša Marić1*, Andrej Razpet2, Vera Nikolić1, Predrag Simonović1 2011                                                                                                                                                                                                                                                                                              | High      |
| 7                                              | 2.04 | How many potential vectors could the taxon use to enter in the RA area?                                                                                                 | One                                                 | Intentional, stocking                                                                                                                                                                                                                                                                                                                                                                                                                                                                                                | High      |
| 8                                              | 2.05 | Is the taxon currently found in close proximity to, and likely to enter into, the RA area in the near future (e.g. unintentional and intentional introductions)?        | Yes                                                 | National Aquaculture Sector Overview Slovenia.2005. Food and Agriculture Organization of the United Nations for a world without hunger                                                                                                                                                                                                                                                                                                                                                                               | High      |
| 3. Invasive elsewhere                          |      |                                                                                                                                                                         |                                                     |                                                                                                                                                                                                                                                                                                                                                                                                                                                                                                                      |           |
| 9                                              | 3.01 | Has the taxon become naturalised (established viable populations) outside its native range?                                                                             | Yes                                                 | Genetic characterisation of European grayling populations ( <i>Thymallus thymallus</i> ): Implications for conservation and management. Bernhard Gum. 2006.                                                                                                                                                                                                                                                                                                                                                          | Very high |
| 10                                             | 3.02 | In the taxon's introduced range, are there known adverse impacts to wild stocks or commercial taxa?                                                                     | No                                                  | Genetic characterisation of European grayling populations ( <i>Thymallus thymallus</i> ): Implications for conservation and management. Bernhard Gum. 2006.                                                                                                                                                                                                                                                                                                                                                          | High      |
| 11                                             | 3.03 | In the taxon's introduced range, are there known adverse impacts to aquaculture?                                                                                        | No                                                  | Genetic characterisation of European grayling populations ( <i>Thymallus thymallus</i> ): Implications for conservation and management. Bernhard Gum. 2006.                                                                                                                                                                                                                                                                                                                                                          | Very high |
| 12                                             | 3.04 | In the taxon's introduced range, are there known adverse impacts to ecosystem services?                                                                                 | No                                                  | Genetic characterisation of European grayling populations ( <i>Thymallus thymallus</i> ): Implications for conservation and management. Bernhard Gum. 2006.                                                                                                                                                                                                                                                                                                                                                          | Very high |
| 13                                             | 3.05 | In the taxon's introduced range, are there known adverse socio-economic impacts?                                                                                        | No                                                  | Genetic characterisation of European grayling populations ( <i>Thymallus thymallus</i> ): Implications for conservation and management. Bernhard Gum. 2006.                                                                                                                                                                                                                                                                                                                                                          | High      |
| B. Biology/Ecology                             |      |                                                                                                                                                                         |                                                     |                                                                                                                                                                                                                                                                                                                                                                                                                                                                                                                      |           |
| 4. Undesirable (or persistence) traits         |      |                                                                                                                                                                         |                                                     |                                                                                                                                                                                                                                                                                                                                                                                                                                                                                                                      |           |
| 14                                             | 4.01 | Is it likely that the taxon will be poisonous or pose other risks to human health?                                                                                      | No                                                  | Genetic characterisation of European grayling populations ( <i>Thymallus thymallus</i> ): Implications for conservation and management. Bernhard Gum. 2006.                                                                                                                                                                                                                                                                                                                                                          | Very high |
| 15                                             | 4.02 | Is it likely that the taxon will smother one or more native taxa (that are not threatened or protected)?                                                                | No                                                  | Genetic characterisation of European grayling populations ( <i>Thymallus thymallus</i> ): Implications for conservation and management. Bernhard Gum. 2006.                                                                                                                                                                                                                                                                                                                                                          | High      |
| 16                                             | 4.03 | Are there any threatened or protected taxa that the non-native taxon would parasitise in the RA area?                                                                   | No                                                  | Genetic characterisation of European grayling populations ( <i>Thymallus thymallus</i> ): Implications for conservation and management. Bernhard Gum. 2006.                                                                                                                                                                                                                                                                                                                                                          | Very high |
| 17                                             | 4.04 | Is the taxon adaptable in terms of climatic and other environmental conditions, thus enhancing its potential persistence if it has invaded or could invade the RA area? | No                                                  | Genetic characterisation of European grayling populations ( <i>Thymallus thymallus</i> ): Implications for conservation and management. Bernhard Gum. 2006.                                                                                                                                                                                                                                                                                                                                                          | High      |
| 18                                             | 4.05 | Is the taxon likely to disrupt food-web structure/function in aquatic ecosystems if it has invaded or is likely to invade the RA area?                                  | No                                                  | Genetic characterisation of European grayling populations ( <i>Thymallus thymallus</i> ): Implications for conservation and management. Bernhard Gum. 2006.                                                                                                                                                                                                                                                                                                                                                          | High      |
| 19                                             | 4.06 | Is the taxon likely to exert adverse impacts on ecosystem services in the RA area?                                                                                      | No                                                  | Genetic characterisation of European grayling populations ( <i>Thymallus thymallus</i> ): Implications for conservation and management. Bernhard Gum. 2006.                                                                                                                                                                                                                                                                                                                                                          | High      |

|                                 |      |                                                                                                                                                                    |     |                                                                                                                                                                                                                                                                                                                                                                                                                                                                                                                                                                           |           |
|---------------------------------|------|--------------------------------------------------------------------------------------------------------------------------------------------------------------------|-----|---------------------------------------------------------------------------------------------------------------------------------------------------------------------------------------------------------------------------------------------------------------------------------------------------------------------------------------------------------------------------------------------------------------------------------------------------------------------------------------------------------------------------------------------------------------------------|-----------|
| 20                              | 4.07 | Is it likely that the taxon will host, and/or act as a vector for, recognised pests and infectious agents that are endemic in the RA area?                         | Yes | Reservoir hosts for Gyrodactylus salaris may play a more significant role in epidemics than previously thought Giuseppe Paladini1*, Haakon Hansen2, Chris F Williams3, Nick GH Taylor4, Olga L Rubio-Mejía1, Scott J Denholm5, Sigurd Hytterød1, James E Bron1 and Andrew P Shinn 2014 Distribution of Pseudomonas fluorescens and Aeromonas hydrophila Bacteria in a Recirculating Aquaculture System during Farming of European Grayling (Thymallus thymallus L.) Broodstock Iwona Gołaś 1,* , Mariusz Szmyt , Jacek Potorski 1. Michał Łopata 3 Anna Gotkowska-Plachta | High      |
| 21                              | 4.08 | Is it likely that the taxon will host, and/or act as a vector for, recognised pests and infectious agents that are absent from (novel to) the RA area?             | Yes | Distribution of Pseudomonas fluorescens and Aeromonas hydrophila Bacteria in a Recirculating Aquaculture System during Farming of European Grayling (Thymallus thymallus L.) Broodstock Iwona Gołaś 1,* , Mariusz Szmyt , Jacek Potorski 1, Michał Łopata 3 Anna Gotkowska-Plachta 1 and Katarzyna Gli                                                                                                                                                                                                                                                                    | High      |
| 22                              | 4.09 | Is it likely that the taxon will achieve a body size that will make it more likely to be released from captivity?                                                  | Yes | Genetic characterisation of European grayling populations (Thymallus thymallus): Implications for conservation and management. Bernhard Gum. 2006.                                                                                                                                                                                                                                                                                                                                                                                                                        | High      |
| 23                              | 4.10 | Is the taxon capable of sustaining itself in a range of water velocity conditions (e.g. versatile in habitat use)?                                                 | Yes | Genetic characterisation of European grayling populations (Thymallus thymallus): Implications for conservation and management. Bernhard Gum. 2006.                                                                                                                                                                                                                                                                                                                                                                                                                        | Very high |
| 24                              | 4.11 | Is it likely that the taxon's mode of existence (e.g. excretion of by-products) or behaviours (e.g. feeding) will reduce habitat quality for native taxa?          | No  | Kottelat, M. and J. Freyhof, 2007. Handbook of European freshwater fishes. Publications Kottelat, Cornol and Freyhof, Berlin. 646 pp.                                                                                                                                                                                                                                                                                                                                                                                                                                     | Very high |
| 25                              | 4.12 | Is the taxon likely to maintain a viable population even when present in low densities (or persisting in adverse conditions by way of a dormant form)?             | No  | Genetic characterisation of European grayling populations (Thymallus thymallus): Implications for conservation and management. Bernhard Gum. 2006.                                                                                                                                                                                                                                                                                                                                                                                                                        | High      |
| <b>5. Resource exploitation</b> |      |                                                                                                                                                                    |     |                                                                                                                                                                                                                                                                                                                                                                                                                                                                                                                                                                           |           |
| 26                              | 5.01 | Is the taxon likely to consume threatened or protected native taxa in the RA area?                                                                                 | Yes | Kottelat, M. and J. Freyhof, 2007. Handbook of European freshwater fishes. Publications Kottelat, Cornol and Freyhof, Berlin. 646 pp.                                                                                                                                                                                                                                                                                                                                                                                                                                     | High      |
| 27                              | 5.02 | Is the taxon likely to sequester food resources (including nutrients) to the detriment of native taxa in the RA area?                                              | No  | Kottelat, M. and J. Freyhof, 2007. Handbook of European freshwater fishes. Publications Kottelat, Cornol and Freyhof, Berlin. 646 pp.                                                                                                                                                                                                                                                                                                                                                                                                                                     | High      |
| <b>6. Reproduction</b>          |      |                                                                                                                                                                    |     |                                                                                                                                                                                                                                                                                                                                                                                                                                                                                                                                                                           |           |
| 28                              | 6.01 | Is the taxon likely to exhibit parental care and/or to reduce age-at-maturity in response to environmental conditions?                                             | Yes | Kottelat, M. and J. Freyhof, 2007. Handbook of European freshwater fishes. Publications Kottelat, Cornol and Freyhof, Berlin. 646 pp. Genetic characterisation of European grayling populations (Thymallus thymallus): Implications for conservation and management. Bernhard Gum. 2006.                                                                                                                                                                                                                                                                                  | High      |
| 29                              | 6.02 | Is the taxon likely to produce viable gametes or propagules (in the RA area)?                                                                                      | Yes | Genetic characterisation of European grayling populations (Thymallus thymallus): Implications for conservation and management. Bernhard Gum. 2006.                                                                                                                                                                                                                                                                                                                                                                                                                        | High      |
| 30                              | 6.03 | Is the taxon likely to hybridise naturally with native taxa?                                                                                                       | No  | Kottelat, M. and J. Freyhof, 2007. Handbook of European freshwater fishes. Publications Kottelat, Cornol and Freyhof, Berlin. 646 pp.                                                                                                                                                                                                                                                                                                                                                                                                                                     | High      |
| 31                              | 6.04 | Is the taxon likely to be hermaphroditic or to display asexual reproduction?                                                                                       | No  | Kottelat, M. and J. Freyhof, 2007. Handbook of European freshwater fishes. Publications Kottelat, Cornol and Freyhof, Berlin. 646 pp.                                                                                                                                                                                                                                                                                                                                                                                                                                     | Very high |
| 32                              | 6.05 | Is the taxon dependent on the presence of another taxon (or specific habitat features) to complete its life cycle?                                                 | No  | Genetic characterisation of European grayling populations (Thymallus thymallus): Implications for conservation and management. Bernhard Gum. 2006.                                                                                                                                                                                                                                                                                                                                                                                                                        | High      |
| 33                              | 6.06 | Is the taxon known (or likely) to produce a large number of propagules or offspring within a short time span (e.g. < 1 year)?                                      | Yes | Genetic characterisation of European grayling populations (Thymallus thymallus): Implications for conservation and management. Bernhard Gum. 2006.                                                                                                                                                                                                                                                                                                                                                                                                                        | Very high |
| 34                              | 6.07 | How many time units (days, months, years) does the taxon require to reach the age-at-first-reproduction?                                                           | 3   | Genetic characterisation of European grayling populations (Thymallus thymallus): Implications for conservation and management. Bernhard Gum. 2006.                                                                                                                                                                                                                                                                                                                                                                                                                        | Very high |
| <b>7. Dispersal mechanisms</b>  |      |                                                                                                                                                                    |     |                                                                                                                                                                                                                                                                                                                                                                                                                                                                                                                                                                           |           |
| 35                              | 7.01 | How many potential internal vectors/pathways could the taxon use to disperse within the RA area (with suitable vectors/pathways)?                                  | One | Stocking. Hatcheries escape?                                                                                                                                                                                                                                                                                                                                                                                                                                                                                                                                              | Medium    |
| 36                              | 7.02 | Will any of these vectors/pathways bring the taxon in close proximity to one or more protected areas (e.g. MCZ, MPA, SSSI)?                                        | Yes | Genetic differentiation of European grayling (Thymallus thymallus) populations in Serbia, based on mitochondrial and nuclear DNA analyses Saša Marić1*, Andrej Razpet2, Vera Nikolić1, Predrag Simonović1 2011                                                                                                                                                                                                                                                                                                                                                            | High      |
| 37                              | 7.03 | Does the taxon have a means of actively attaching itself to hard substrata (e.g. ship hulls, pilings, buoys) such that it enhances the likelihood of dispersal?    | No  | Kottelat, M. and J. Freyhof, 2007. Handbook of European freshwater fishes. Publications Kottelat, Cornol and Freyhof, Berlin. 646 pp.                                                                                                                                                                                                                                                                                                                                                                                                                                     | Very high |
| 38                              | 7.04 | Is natural dispersal of the taxon likely to occur as eggs (for animals) or as propagules (for plants: seeds, spores) in the RA area?                               | No  | Kottelat, M. and J. Freyhof, 2007. Handbook of European freshwater fishes. Publications Kottelat, Cornol and Freyhof, Berlin. 646 pp.                                                                                                                                                                                                                                                                                                                                                                                                                                     | High      |
| 39                              | 7.05 | Is natural dispersal of the taxon likely to occur as larvae/juveniles (for animals) or as fragments/seedlings (for plants) in the RA area?                         | No  | Genetic characterisation of European grayling populations (Thymallus thymallus): Implications for conservation and management. Bernhard Gum. 2006.                                                                                                                                                                                                                                                                                                                                                                                                                        | High      |
| 40                              | 7.06 | Are older life stages of the taxon likely to migrate in the RA area for reproduction?                                                                              | Yes | Genetic characterisation of European grayling populations (Thymallus thymallus): Implications for conservation and management. Bernhard Gum. 2006.                                                                                                                                                                                                                                                                                                                                                                                                                        | Very high |
| 41                              | 7.07 | Are propagules or eggs of the taxon likely to be dispersed in the RA area by other animals?                                                                        | No  | Genetic characterisation of European grayling populations (Thymallus thymallus): Implications for conservation and management. Bernhard Gum. 2006.                                                                                                                                                                                                                                                                                                                                                                                                                        | Very high |
| 42                              | 7.08 | Is dispersal of the taxon along any of the vectors/pathways mentioned in the previous seven questions (35–41; i.e. both unintentional or intentional) likely to be | No  | Genetic characterisation of European grayling populations (Thymallus thymallus): Implications for conservation and management. Bernhard Gum. 2006.                                                                                                                                                                                                                                                                                                                                                                                                                        | High      |
| 43                              | 7.09 | Is dispersal of the taxon density dependent?                                                                                                                       | Yes | REF                                                                                                                                                                                                                                                                                                                                                                                                                                                                                                                                                                       | Medium    |
| <b>8. Tolerance attributes</b>  |      |                                                                                                                                                                    |     |                                                                                                                                                                                                                                                                                                                                                                                                                                                                                                                                                                           |           |
| 44                              | 8.01 | Is the taxon able to withstand being out of water for extended periods (e.g. minimum of one or more hours) at some stage of its life cycle?                        | No  | Genetic characterisation of European grayling populations (Thymallus thymallus): Implications for conservation and management. Bernhard Gum. 2006.                                                                                                                                                                                                                                                                                                                                                                                                                        | Very high |

|                          |      |                                                                                                                                                                              |                |                                                                                                                                                    |           |
|--------------------------|------|------------------------------------------------------------------------------------------------------------------------------------------------------------------------------|----------------|----------------------------------------------------------------------------------------------------------------------------------------------------|-----------|
| 45                       | 8.02 | Is the taxon tolerant of a wide range of water quality conditions relevant to that taxon? [In the Justification field, indicate the relevant water quality variable(s) being | No             | Genetic characterisation of European grayling populations (Thymallus thymallus): Implications for conservation and management. Bernhard Gum. 2006. | Very high |
| 46                       | 8.03 | Can the taxon be controlled or eradicated in the wild with chemical, biological, or other agents/means?                                                                      | Not applicable | Genetic characterisation of European grayling populations (Thymallus thymallus): Implications for conservation and management. Bernhard Gum. 2006. | Very high |
| 47                       | 8.04 | Is the taxon likely to tolerate or benefit from environmental/human disturbance?                                                                                             | No             | Genetic characterisation of European grayling populations (Thymallus thymallus): Implications for conservation and management. Bernhard Gum. 2006. | High      |
| 48                       | 8.05 | Is the taxon able to tolerate salinity levels that are higher or lower than those found in its usual environment?                                                            | Yes            | Genetic characterisation of European grayling populations (Thymallus thymallus): Implications for conservation and management. Bernhard Gum. 2006. | High      |
| 49                       | 8.06 | Are there effective natural enemies (predators) of the taxon present in the RA                                                                                               | Yes            | Kottelat, M. and J. Freyhof, 2007. Handbook of European freshwater fishes. Publications Kottelat, Cornol and Freyhof,                              | Very high |
| <b>C. Climate change</b> |      |                                                                                                                                                                              |                |                                                                                                                                                    |           |
| <b>9. Climate change</b> |      |                                                                                                                                                                              |                |                                                                                                                                                    |           |
| 50                       | 9.01 | Under the predicted future climatic conditions, are the risks of entry into the RA area posed by the taxon likely to increase, decrease or not change?                       | No change      | Genetic characterisation of European grayling populations (Thymallus thymallus): Implications for conservation and management. Bernhard Gum. 2006. | Very high |
| 51                       | 9.02 | Under the predicted future climatic conditions, are the risks of establishment posed by the taxon likely to increase, decrease or not change?                                | Decrease       | Genetic characterisation of European grayling populations (Thymallus thymallus): Implications for conservation and management. Bernhard Gum. 2006. | Medium    |
| 52                       | 9.03 | Under the predicted future climatic conditions, are the risks of dispersal within the RA area posed by the taxon likely to increase, decrease or not change?                 | Decrease       | Genetic characterisation of European grayling populations (Thymallus thymallus): Implications for conservation and management. Bernhard Gum. 2006. | High      |
| 53                       | 9.04 | Under the predicted future climatic conditions, what is the likely magnitude of future potential impacts on biodiversity and/or ecological integrity/status?                 | No change      | Genetic characterisation of European grayling populations (Thymallus thymallus): Implications for conservation and management. Bernhard Gum. 2006. | Medium    |
| 54                       | 9.05 | Under the predicted future climatic conditions, what is the likely magnitude of future potential impacts on ecosystem structure and/or function?                             | No change      | Genetic characterisation of European grayling populations (Thymallus thymallus): Implications for conservation and management. Bernhard Gum. 2006. | High      |
| 55                       | 9.06 | Under the predicted future climatic conditions, what is the likely magnitude of future potential impacts on ecosystem services/socio-economic factors?                       | No change      | Genetic characterisation of European grayling populations (Thymallus thymallus): Implications for conservation and management. Bernhard Gum. 2006. | High      |

| Statistics                                     |             |
|------------------------------------------------|-------------|
| Scores                                         |             |
| <b>BRA</b>                                     | <b>12.5</b> |
| <b>BRA Outcome</b>                             | <b>-</b>    |
| <b>BRA+CCA</b>                                 | <b>8.5</b>  |
| <b>BRA+CCA Outcome</b>                         | <b>-</b>    |
| Score partition                                |             |
| <b>A. Biogeography/Historical</b>              | <b>4.5</b>  |
| 1. Domestication/Cultivation                   | 2.0         |
| 2. Climate, distribution and introduction risk | 1.0         |
| 3. Invasive elsewhere                          | 1.5         |
| <b>B. Biology/Ecology</b>                      | <b>8.0</b>  |
| 4. Undesirable (or persistence) traits         | 3.0         |
| 5. Resource exploitation                       | 5.0         |
| 6. Reproduction                                | 2.0         |
| 7. Dispersal mechanisms                        | -1.0        |
| 8. Tolerance attributes                        | -1.0        |
| <b>C. Climate change</b>                       | <b>-4.0</b> |
| 9. Climate change                              | -4.0        |
| Answered Questions                             |             |
| <b>Total</b>                                   | <b>55</b>   |
| <b>A. Biogeography/Historical</b>              | <b>13</b>   |
| 1. Domestication/Cultivation                   | 3           |
| 2. Climate, distribution and introduction risk | 5           |
| 3. Invasive elsewhere                          | 5           |
| <b>B. Biology/Ecology</b>                      | <b>36</b>   |
| 4. Undesirable (or persistence) traits         | 12          |
| 5. Resource exploitation                       | 2           |
| 6. Reproduction                                | 7           |
| 7. Dispersal mechanisms                        | 9           |
| 8. Tolerance attributes                        | 6           |
| <b>C. Climate change</b>                       | <b>6</b>    |
| 9. Climate change                              | 6           |
| Sectors affected                               |             |
| <b>Commercial</b>                              | <b>4</b>    |
| <b>Environmental</b>                           | <b>6</b>    |
| <b>Species or population nuisance traits</b>   | <b>1</b>    |

| Thresholds     |             |
|----------------|-------------|
| <b>BRA</b>     | <b>-</b>    |
| <b>BRA+CCA</b> | <b>-</b>    |
| Confidence     |             |
| <b>BRA+CCA</b> | <b>0.82</b> |
| <b>BRA</b>     | <b>0.83</b> |
| <b>CCA</b>     | <b>0.71</b> |

| Date and Time       |  |
|---------------------|--|
| 17/05/2021 00:14:57 |  |

## AS-ISK v2

| Taxon and Assessor details         |                                         |
|------------------------------------|-----------------------------------------|
| Category                           | Fishes and Lampreys (freshwater)        |
| Taxon name                         | <i>Thymallus thymallus</i>              |
| Common name                        | grayling                                |
| Assessor                           | Ivan Špelić                             |
| Risk screening context             |                                         |
| Reason and socio-economic benefits |                                         |
| Risk assessment area               | Danube & Adriatic basins BA, HR, ME, RS |
| Taxonomy                           |                                         |
| Native range                       |                                         |
| Introduced range                   |                                         |
| URL                                |                                         |

|                                                |      |                                                                                                                                                                         | Response       | Justification (references and/or other information)                                                                                                                                             | Confidence |
|------------------------------------------------|------|-------------------------------------------------------------------------------------------------------------------------------------------------------------------------|----------------|-------------------------------------------------------------------------------------------------------------------------------------------------------------------------------------------------|------------|
| A. Biogeography / Historical                   |      |                                                                                                                                                                         |                |                                                                                                                                                                                                 |            |
| 1. Domestication/Cultivation                   |      |                                                                                                                                                                         |                |                                                                                                                                                                                                 |            |
| 1                                              | 1.01 | Has the taxon been the subject of domestication (or cultivation) for at least 20 generations?                                                                           | Yes            | Farming for restocking (FAO)                                                                                                                                                                    | Very high  |
| 2                                              | 1.02 | Is the taxon harvested in the wild and likely to be sold or used in its live form?                                                                                      | Yes            | Farmed and sold live for restocking of open waters (FAO)                                                                                                                                        | Very high  |
| 3                                              | 1.03 | Does the taxon have invasive races, varieties, sub-taxa or congeners?                                                                                                   | No             | Personal opinion                                                                                                                                                                                | Very high  |
| 2. Climate, distribution and introduction risk |      |                                                                                                                                                                         |                |                                                                                                                                                                                                 |            |
| 4                                              | 2.01 | How similar are the climatic conditions of the Risk Assessment (RA) area and the taxon's native range?                                                                  | Medium         | Climatch 2020                                                                                                                                                                                   | Low        |
| 5                                              | 2.02 | What is the quality of the climate matching data?                                                                                                                       | Low            | Climatch 2020                                                                                                                                                                                   | High       |
| 6                                              | 2.03 | Is the taxon already present outside of captivity in the RA area?                                                                                                       | Yes            | Cetina with tributaries (personal observation).                                                                                                                                                 | Very high  |
| 7                                              | 2.04 | How many potential vectors could the taxon use to enter in the RA area?                                                                                                 | Not applicable | Already present                                                                                                                                                                                 | Very high  |
| 8                                              | 2.05 | Is the taxon currently found in close proximity to, and likely to enter into, the RA area in the near future (e.g. unintentional and intentional introductions)?        | Not applicable | Already present                                                                                                                                                                                 | Very high  |
| 3. Invasive elsewhere                          |      |                                                                                                                                                                         |                |                                                                                                                                                                                                 |            |
| 9                                              | 3.01 | Has the taxon become naturalised (established viable populations) outside its native range?                                                                             | Yes            | easily reproduce in new areas (personal data)                                                                                                                                                   | Very high  |
| 10                                             | 3.02 | In the taxon's introduced range, are there known adverse impacts to wild stocks or commercial taxa?                                                                     | Yes            | Hybridizing with native endemic subspecies (Horvath et al. 2014)                                                                                                                                | Very high  |
| 11                                             | 3.03 | In the taxon's introduced range, are there known adverse impacts to aquaculture?                                                                                        | No             | in this areas there is no such activities                                                                                                                                                       | Very high  |
| 12                                             | 3.04 | In the taxon's introduced range, are there known adverse impacts to ecosystem                                                                                           | Yes            | Reducing population of endemic subspecies (Horvath et al 2014)                                                                                                                                  | High       |
| 13                                             | 3.05 | In the taxon's introduced range, are there known adverse socio-economic impacts?                                                                                        | No             | Similar angling suitability as native lineage.                                                                                                                                                  | Medium     |
| B. Biology / Ecology                           |      |                                                                                                                                                                         |                |                                                                                                                                                                                                 |            |
| 4. Undesirable (or persistence) traits         |      |                                                                                                                                                                         |                |                                                                                                                                                                                                 |            |
| 14                                             | 4.01 | Is it likely that the taxon will be poisonous or pose other risks to human health?                                                                                      | No             | Harmless (Froese & Pauly 2019)                                                                                                                                                                  | Very high  |
| 15                                             | 4.02 | Is it likely that the taxon will smother one or more native taxa (that are not threatened or protected)?                                                                | Yes            | Native lineage of grayling (Horvath et al 2014)                                                                                                                                                 | High       |
| 16                                             | 4.03 | Are there any threatened or protected taxa that the non-native taxon would parasitise in the RA area?                                                                   | No             | No examples                                                                                                                                                                                     | Very high  |
| 17                                             | 4.04 | Is the taxon adaptable in terms of climatic and other environmental conditions, thus enhancing its potential persistence if it has invaded or could invade the RA area? | No             | Very sensitive to pollution (Froese & Pauly 2019), cool water species and needs high oxygen levels.                                                                                             | Very high  |
| 18                                             | 4.05 | Is the taxon likely to disrupt food-web structure/function in aquatic ecosystems if it has invaded or is likely to invade the RA area?                                  | No             | No such examples,                                                                                                                                                                               | High       |
| 19                                             | 4.06 | Is the taxon likely to exert adverse impacts on ecosystem services in the RA area?                                                                                      | No             | Suitable for angling, no known adverse impacts.                                                                                                                                                 | Medium     |
| 20                                             | 4.07 | Is it likely that the taxon will host, and/or act as a vector for, recognised pests and infectious agents that are endemic in the RA area?                              | Yes            | Susceptible to pathogens (Grayling ( <i>Thymallus thymallus</i> ) Ecological Risk Screening Summary. U.S. Fish & Wildlife Service, February 2015. Revised, March 2017, April 2017. Web Version, | Medium     |
| 21                                             | 4.08 | Is it likely that the taxon will host, and/or act as a vector for, recognised pests and infectious agents that are absent from (novel to) the RA area?                  | Yes            | Could bring some pathogens when stocked from fish farms (personal opinion), proved to be a vector of <i>Gyrodactylus salaris</i> parasite (Paladini et al. 2014).                               | Medium     |
| 22                                             | 4.09 | Is it likely that the taxon will achieve a body size that will make it more likely to be released from captivity?                                                       | Yes            | Grows to 60 cm and 6,7 kg (Froese & Pauly 2019).                                                                                                                                                | Very high  |
| 23                                             | 4.10 | Is the taxon capable of sustaining itself in a range of water velocity conditions (e.g. versatile in habitat use)?                                                      | Yes            | Inhabits fast flowing rivers, in Scandinavia it occurs in clear lakes (Froese & Pauly 2019).                                                                                                    | Very high  |
| 24                                             | 4.11 | Is it likely that the taxon's mode of existence (e.g. excretion of by-products) or behaviours (e.g. feeding) will reduce habitat quality for native taxa?               | No             | No data available but sensitive to pollution and inhabits localities with stone or hard sand bottom (Froese & Pauly 2019).                                                                      | High       |
| 25                                             | 4.12 | Is the taxon likely to maintain a viable population even when present in low densities (or persisting in adverse conditions by way of a dormant form)?                  | No             | No data, forms schools, gregarious (Froese & Pauly 2019).                                                                                                                                       | Very high  |



|                          |      |                                                                                                                                                                              |                |                                                                                                                                                                                                      |           |
|--------------------------|------|------------------------------------------------------------------------------------------------------------------------------------------------------------------------------|----------------|------------------------------------------------------------------------------------------------------------------------------------------------------------------------------------------------------|-----------|
| 5. Resource exploitation |      |                                                                                                                                                                              |                |                                                                                                                                                                                                      |           |
| 26                       | 5.01 | Is the taxon likely to consume threatened or protected native taxa in the RA area?                                                                                           | Yes            | No records on possible or actual impacts of introductions (Ecological Risk Screening Summary. U.S. Fish & Wildlife Service, February 2015. Revised, March 2017, April 2017. Web Version, 6/25/2018). | Medium    |
| 27                       | 5.02 | Is the taxon likely to sequester food resources (including nutrients) to the detriment of native taxa in the RA area?                                                        | Not applicable | No data for calculation.                                                                                                                                                                             | Very high |
| 6. Reproduction          |      |                                                                                                                                                                              |                |                                                                                                                                                                                                      |           |
| 28                       | 6.01 | Is the taxon likely to exhibit parental care and/or to reduce age-at-maturity in response to environmental conditions?                                                       | No             | Males defending territories at spawning site but leave after spawning and do not guard the eggs (Ingram et al. 2000).                                                                                | Very high |
| 29                       | 6.02 | Is the taxon likely to produce viable gametes or propagules (in the RA area)?                                                                                                | Yes            | Personal observation.                                                                                                                                                                                | Very high |
| 30                       | 6.03 | Is the taxon likely to hybridise naturally with native taxa?                                                                                                                 | No             | No native species to hybridise with (Kottelat & Freyhof 2007).                                                                                                                                       | Very high |
| 31                       | 6.04 | Is the taxon likely to be hermaphroditic or to display asexual reproduction?                                                                                                 | No             | No such data                                                                                                                                                                                         | Very high |
| 32                       | 6.05 | Is the taxon dependent on the presence of another taxon (or specific habitat features) to complete its life cycle?                                                           | Yes            | Breeds in shallow stretches, usually 20-40 cm deep, or riffles, with moderate current of about 0.5 m/s and clean gravel bottom (Froese & Pauly 2019).                                                | Very high |
| 33                       | 6.06 | Is the taxon known (or likely) to produce a large number of propagules or offspring within a short time span (e.g. < 1 year)?                                                | Yes            | Female grayling can lay between 421 – 36,000 eggs per breeding season (Peter Jørgen Tønnessen Haddeland, 2012 MSc thesis)                                                                            | Very high |
| 34                       | 6.07 | How many time units (days, months, years) does the taxon require to reach the age-at-first-reproduction?                                                                     | 2              | kottelat and Freyhof                                                                                                                                                                                 | Very high |
| 7. Dispersal mechanisms  |      |                                                                                                                                                                              |                |                                                                                                                                                                                                      |           |
| 35                       | 7.01 | How many potential internal vectors/pathways could the taxon use to disperse within the RA area (with suitable protected areas (e.g. MCZ, MPA, SSSI)?                        | >1             | Stocking (Horvath et al. 2014), floods (personal opinion).                                                                                                                                           | Medium    |
| 36                       | 7.02 | Will any of these vectors/pathways bring the taxon in close proximity to one or more protected areas (e.g. MCZ, MPA, SSSI)?                                                  | Yes            | Krka National park                                                                                                                                                                                   | Medium    |
| 37                       | 7.03 | Does the taxon have a means of actively attaching itself to hard substrata (e.g. ship hulls, pilings, buoys) such that it enhances the likelihood of dispersal?              | No             | No adaptations.                                                                                                                                                                                      | Very high |
| 38                       | 7.04 | Is natural dispersal of the taxon likely to occur as eggs (for animals) or as propagules (for plants: seeds, spores) in the RA area?                                         | No             | They dig redds and have sticky eggs (Everard & Knight 2013).                                                                                                                                         | High      |
| 39                       | 7.05 | Is natural dispersal of the taxon likely to occur as larvae/juveniles (for animals) or as fragments/seedlings (for plants) in the RA area?                                   | Yes            | Dokk 2015                                                                                                                                                                                            | Very high |
| 40                       | 7.06 | Are older life stages of the taxon likely to migrate in the RA area for reproduction?                                                                                        | Yes            | Ovidio et al. 2004                                                                                                                                                                                   | Very high |
| 41                       | 7.07 | Are propagules or eggs of the taxon likely to be dispersed in the RA area by other animals?                                                                                  | No             | No data                                                                                                                                                                                              | Very high |
| 42                       | 7.08 | Is dispersal of the taxon along any of the vectors/pathways mentioned in the previous seven questions (35–41; i.e. both unintentional or intentional) likely to be           | Yes            | Stocking, drift                                                                                                                                                                                      | Very high |
| 43                       | 7.09 | Is dispersal of the taxon density dependent?                                                                                                                                 | No             | No data to support this                                                                                                                                                                              | Very high |
| 8. Tolerance attributes  |      |                                                                                                                                                                              |                |                                                                                                                                                                                                      |           |
| 44                       | 8.01 | Is the taxon able to withstand being out of water for extended periods (e.g. minimum of one or more hours) at some stage of its life cycle?                                  | No             | Very sensitive species (personal data).                                                                                                                                                              | Very high |
| 45                       | 8.02 | Is the taxon tolerant of a wide range of water quality conditions relevant to that taxon? [In the Justification field, indicate the relevant water quality variable(s) being | No             | Sensitive to pollution (Froese & Pauly 2019).                                                                                                                                                        | Very high |
| 46                       | 8.03 | Can the taxon be controlled or eradicated in the wild with chemical, biological, or other agents/means?                                                                      | No             | Not allowed                                                                                                                                                                                          | Very high |
| 47                       | 8.04 | Is the taxon likely to tolerate or benefit from environmental/human disturbance?                                                                                             | No             | Population reduction caused by anthropogenic damage to biotopes (Ovidio et al. 2004).                                                                                                                | Very high |
| 48                       | 8.05 | Is the taxon able to tolerate salinity levels that are higher or lower than those found in its usual environment?                                                            | No             | Unable to tolerate higher saline waters (Blair et al. 2016).                                                                                                                                         | Very high |
| 49                       | 8.06 | Are there effective natural enemies (predators) of the taxon present in the RA                                                                                               | Yes            | Piscivorous birds, predatory fish (pike), otters.                                                                                                                                                    | High      |
| C. Climate change        |      |                                                                                                                                                                              |                |                                                                                                                                                                                                      |           |
| 9. Climate change        |      |                                                                                                                                                                              |                |                                                                                                                                                                                                      |           |
| 50                       | 9.01 | Under the predicted future climatic conditions, are the risks of entry into the RA area posed by the taxon likely to increase, decrease or not change?                       | Not applicable | Already present.                                                                                                                                                                                     | Very high |
| 51                       | 9.02 | Under the predicted future climatic conditions, are the risks of establishment posed by the taxon likely to increase, decrease or not change?                                | Decrease       | Significant reductions in suitable range for grayling under future climate predictions were demonstrated for UK (Huml et al. 2019). Similar can be expected for the RA area.                         | Medium    |
| 52                       | 9.03 | Under the predicted future climatic conditions, are the risks of dispersal within the RA area posed by the taxon likely to increase, decrease or not change?                 | Decrease       | Significant reductions in suitable range for grayling under future climate predictions were demonstrated for UK (Huml et al. 2019). Similar can be expected for the RA area.                         | Medium    |
| 53                       | 9.04 | Under the predicted future climatic conditions, what is the likely magnitude of future potential impacts on biodiversity and/or ecological integrity/status?                 | No change      | Impact already virtually non-existent (after hybridization with native lineage) - personal opinion.                                                                                                  | Medium    |

|    |      |                                                                                                                                                        |           |                                                                                                                                                                                                      |        |
|----|------|--------------------------------------------------------------------------------------------------------------------------------------------------------|-----------|------------------------------------------------------------------------------------------------------------------------------------------------------------------------------------------------------|--------|
| 54 | 9.05 | Under the predicted future climatic conditions, what is the likely magnitude of future potential impacts on ecosystem structure and/or function?       | No change | No records on possible or actual impacts of introductions (Ecological Risk Screening Summary. U.S. Fish & Wildlife Service, February 2015. Revised, March 2017, April 2017. Web Version, 6/25/2018). | Medium |
| 55 | 9.06 | Under the predicted future climatic conditions, what is the likely magnitude of future potential impacts on ecosystem services/socio-economic factors? | No change | No records on possible or actual impacts of introductions (Ecological Risk Screening Summary. U.S. Fish & Wildlife Service, February 2015. Revised, March 2017, April 2017. Web Version, 6/25/2018). | Medium |

| Statistics                                     |             |
|------------------------------------------------|-------------|
| Scores                                         |             |
| <b>BRA</b>                                     | <b>19.0</b> |
| <b>BRA Outcome</b>                             | <b>-</b>    |
| <b>BRA+CCA</b>                                 | <b>15.0</b> |
| <b>BRA+CCA Outcome</b>                         | <b>-</b>    |
| Score partition                                |             |
| <b>A. Biogeography/Historical</b>              | <b>13.0</b> |
| 1. Domestication/Cultivation                   | 2.0         |
| 2. Climate, distribution and introduction risk | 1.0         |
| 3. Invasive elsewhere                          | 10.0        |
| <b>B. Biology/Ecology</b>                      | <b>6.0</b>  |
| 4. Undesirable (or persistence) traits         | 4.0         |
| 5. Resource exploitation                       | 5.0         |
| 6. Reproduction                                | -1.0        |
| 7. Dispersal mechanisms                        | 2.0         |
| 8. Tolerance attributes                        | -4.0        |
| <b>C. Climate change</b>                       | <b>-4.0</b> |
| 9. Climate change                              | -4.0        |
| Answered Questions                             |             |
| <b>Total</b>                                   | <b>55</b>   |
| <b>A. Biogeography/Historical</b>              | <b>13</b>   |
| 1. Domestication/Cultivation                   | 3           |
| 2. Climate, distribution and introduction risk | 5           |
| 3. Invasive elsewhere                          | 5           |
| <b>B. Biology/Ecology</b>                      | <b>36</b>   |
| 4. Undesirable (or persistence) traits         | 12          |
| 5. Resource exploitation                       | 2           |
| 6. Reproduction                                | 7           |
| 7. Dispersal mechanisms                        | 9           |
| 8. Tolerance attributes                        | 6           |
| <b>C. Climate change</b>                       | <b>6</b>    |
| 9. Climate change                              | 6           |
| Sectors affected                               |             |
| <b>Commercial</b>                              | <b>10</b>   |
| <b>Environmental</b>                           | <b>10</b>   |
| <b>Species or population nuisance traits</b>   | <b>-1</b>   |

| Thresholds     |             |
|----------------|-------------|
| <b>BRA</b>     | <b>-</b>    |
| <b>BRA+CCA</b> | <b>-</b>    |
| Confidence     |             |
| <b>BRA+CCA</b> | <b>0.85</b> |
| <b>BRA</b>     | <b>0.88</b> |
| <b>CCA</b>     | <b>0.58</b> |

| Date and Time       |  |
|---------------------|--|
| 25/05/2021 23:50:10 |  |

## AS-ISK v2

| Taxon and Assessor details         |                                         |
|------------------------------------|-----------------------------------------|
| Category                           | Fishes and Lampreys (freshwater)        |
| Taxon name                         | <i>Thymallus thymallus</i>              |
| Common name                        | grayling                                |
| Assessor                           | Tamara Kanjuh                           |
| Risk screening context             |                                         |
| Reason and socio-economic benefits |                                         |
| Risk assessment area               | Danube & Adriatic basins BA, HR, ME, RS |
| Taxonomy                           |                                         |
| Native range                       |                                         |
| Introduced range                   |                                         |
| URL                                |                                         |

|                                                |      | Response                                                                                                                                                                | Justification (references and/or other information) | Confidence                                                                                                                                                                                                                                                                                                                                                 |        |
|------------------------------------------------|------|-------------------------------------------------------------------------------------------------------------------------------------------------------------------------|-----------------------------------------------------|------------------------------------------------------------------------------------------------------------------------------------------------------------------------------------------------------------------------------------------------------------------------------------------------------------------------------------------------------------|--------|
| A. Biogeography/Historical                     |      |                                                                                                                                                                         |                                                     |                                                                                                                                                                                                                                                                                                                                                            |        |
| 1. Domestication/Cultivation                   |      |                                                                                                                                                                         |                                                     |                                                                                                                                                                                                                                                                                                                                                            |        |
| 1                                              | 1.01 | Has the taxon been the subject of domestication (or cultivation) for at least 20 generations?                                                                           | Yes                                                 | Thymallus thymallus is reared for re-stocking and for feeding purposes. It is a highly appreciated species for sports fishing in northern Europe, where several initiatives have been undertaken for conservation of endangered populations. Its breeding in aquaculture relies mostly on wild parents, and many aspects of its rearing remain undisclosed | High   |
| 2                                              | 1.02 | Is the taxon harvested in the wild and likely to be sold or used in its live form?                                                                                      | Yes                                                 | Due to their agreeable taste and attractive form, the grayling species are valued as food and game fishes, and they are occasionally seen in public aquaria                                                                                                                                                                                                | High   |
| 3                                              | 1.03 | Does the taxon have invasive races, varieties, sub-taxa or congeners?                                                                                                   | No                                                  | In recent years, an increasing number of studies report severe declines in population sizes (Uiblein et al., 2005).                                                                                                                                                                                                                                        | High   |
| 2. Climate, distribution and introduction risk |      |                                                                                                                                                                         |                                                     |                                                                                                                                                                                                                                                                                                                                                            |        |
| 4                                              | 2.01 | How similar are the climatic conditions of the Risk Assessment (RA) area and the taxon's native range?                                                                  | Medium                                              | Dfa, Dfb (Köppen–Geiger climate classification system)                                                                                                                                                                                                                                                                                                     | Medium |
| 5                                              | 2.02 | What is the quality of the climate matching data?                                                                                                                       | High                                                | Köppen–Geiger climate classification system                                                                                                                                                                                                                                                                                                                | High   |
| 6                                              | 2.03 | Is the taxon already present outside of captivity in the RA area?                                                                                                       | Yes                                                 | European grayling was introduced to the Skadar Lake drainage area in the 1960s (Drecun, 1962; Knežević, 1981) and is present in the inland waters of Montenegro (Morača River) and may also be present in Skadar Lake (Talevski et al., 2009).                                                                                                             | High   |
| 7                                              | 2.04 | How many potential vectors could the taxon use to enter in the RA area?                                                                                                 | One                                                 | Sport fishing.                                                                                                                                                                                                                                                                                                                                             | Medium |
| 8                                              | 2.05 | Is the taxon currently found in close proximity to, and likely to enter into, the RA area in the near future (e.g. unintentional and intentional introductions)?        | Yes                                                 | European grayling was introduced to the Skadar Lake drainage area in the 1960s (Drecun, 1962; Knežević, 1981) and is present in the inland waters of Montenegro (Morača River) and may also be present in Skadar Lake (Talevski et al., 2009).                                                                                                             | High   |
| 3. Invasive elsewhere                          |      |                                                                                                                                                                         |                                                     |                                                                                                                                                                                                                                                                                                                                                            |        |
| 9                                              | 3.01 | Has the taxon become naturalised (established viable populations) outside its                                                                                           | No                                                  | No information found.                                                                                                                                                                                                                                                                                                                                      | Low    |
| 10                                             | 3.02 | In the taxon's introduced range, are there known adverse impacts to wild stocks or commercial taxa?                                                                     | No                                                  | No information found.                                                                                                                                                                                                                                                                                                                                      | Low    |
| 11                                             | 3.03 | In the taxon's introduced range, are there known adverse impacts to aquaculture?                                                                                        | No                                                  | No information found.                                                                                                                                                                                                                                                                                                                                      | Low    |
| 12                                             | 3.04 | In the taxon's introduced range, are there known adverse impacts to ecosystem                                                                                           | No                                                  | No information found.                                                                                                                                                                                                                                                                                                                                      | Low    |
| 13                                             | 3.05 | In the taxon's introduced range, are there known adverse socio-economic impacts?                                                                                        | No                                                  | No information found.                                                                                                                                                                                                                                                                                                                                      | Low    |
| B. Biology/Ecology                             |      |                                                                                                                                                                         |                                                     |                                                                                                                                                                                                                                                                                                                                                            |        |
| 4. Undesirable (or persistence) traits         |      |                                                                                                                                                                         |                                                     |                                                                                                                                                                                                                                                                                                                                                            |        |
| 14                                             | 4.01 | Is it likely that the taxon will be poisonous or pose other risks to human health?                                                                                      | No                                                  | Harmless to human (fishbase.se)                                                                                                                                                                                                                                                                                                                            | High   |
| 15                                             | 4.02 | Is it likely that the taxon will smother one or more native taxa (that are not threatened or protected)?                                                                | No                                                  | No information found.                                                                                                                                                                                                                                                                                                                                      | Low    |
| 16                                             | 4.03 | Are there any threatened or protected taxa that the non-native taxon would parasitise in the RA area?                                                                   | No                                                  | No information found.                                                                                                                                                                                                                                                                                                                                      | Low    |
| 17                                             | 4.04 | Is the taxon adaptable in terms of climatic and other environmental conditions, thus enhancing its potential persistence if it has invaded or could invade the RA area? | No                                                  | Grayling make an ideal indicator species of habitat quality and climate change and, even in comparison with other salmonids, shows high sensitivity to high temperature (Ibbotson et al., 2001; Jonsson&Jonsson, 2009).                                                                                                                                    | Medium |
| 18                                             | 4.05 | Is the taxon likely to disrupt food-web structure/function in aquatic ecosystems if it has invaded or is likely to invade the RA                                        | No                                                  | No information found.                                                                                                                                                                                                                                                                                                                                      | Low    |
| 19                                             | 4.06 | Is the taxon likely to exert adverse impacts on ecosystem services in the RA area?                                                                                      | No                                                  | No information found.                                                                                                                                                                                                                                                                                                                                      | Low    |
| 20                                             | 4.07 | Is it likely that the taxon will host, and/or act as a vector for, recognised pests and infectious agents that are endemic in the RA                                    | No                                                  | No information found.                                                                                                                                                                                                                                                                                                                                      | Low    |
| 21                                             | 4.08 | Is it likely that the taxon will host, and/or act as a vector for, recognised pests and infectious agents that are absent from (novel to) the RA area?                  | No                                                  | No information found.                                                                                                                                                                                                                                                                                                                                      | Low    |
| 22                                             | 4.09 | Is it likely that the taxon will achieve a body size that will make it more likely to be released from captivity?                                                       | No                                                  | No information found.                                                                                                                                                                                                                                                                                                                                      | Low    |
| 23                                             | 4.10 | Is the taxon capable of sustaining itself in a range of water velocity conditions (e.g. versatile in habitat use)?                                                      | Yes                                                 | In general, a moderate velocity is required at spawning sites, ranging from 20-90cm/s (Gonczi, 1989; Sempeski&Gaudin, 1995a).                                                                                                                                                                                                                              | High   |

|                                 |      |                                                                                                                                                                              |     |                                                                                                                                                                                                                                                                                                                                                                                                                                          |        |
|---------------------------------|------|------------------------------------------------------------------------------------------------------------------------------------------------------------------------------|-----|------------------------------------------------------------------------------------------------------------------------------------------------------------------------------------------------------------------------------------------------------------------------------------------------------------------------------------------------------------------------------------------------------------------------------------------|--------|
| 24                              | 4.11 | Is it likely that the taxon's mode of existence (e.g. excretion of by-products) or behaviours (e.g. feeding) will reduce habitat quality for native taxa?                    | No  | No information found.                                                                                                                                                                                                                                                                                                                                                                                                                    | Low    |
| 25                              | 4.12 | Is the taxon likely to maintain a viable population even when present in low densities (or persisting in adverse conditions by way of a dormant form)?                       | Yes | It has been found that density dependent mortality occurred at the highest levels of parent stock (Clark, 1992) High stocking density has also been found to increase downstream dispersion from a site (Cowx, 1994).                                                                                                                                                                                                                    | High   |
| <b>5. Resource exploitation</b> |      |                                                                                                                                                                              |     |                                                                                                                                                                                                                                                                                                                                                                                                                                          |        |
| 26                              | 5.01 | Is the taxon likely to consume threatened or protected native taxa in the RA area?                                                                                           | No  | No information found.                                                                                                                                                                                                                                                                                                                                                                                                                    | Low    |
| 27                              | 5.02 | Is the taxon likely to sequester food resources (including nutrients) to the detriment of native taxa in the RA area?                                                        | No  | No information found.                                                                                                                                                                                                                                                                                                                                                                                                                    | Low    |
| <b>6. Reproduction</b>          |      |                                                                                                                                                                              |     |                                                                                                                                                                                                                                                                                                                                                                                                                                          |        |
| 28                              | 6.01 | Is the taxon likely to exhibit parental care and/or to reduce age-at-maturity in response to environmental conditions?                                                       | No  | Grayling belong to a group of lithophils which hide their brood under gravel and do not guard the deposited eggs (Balon, 1975).                                                                                                                                                                                                                                                                                                          | Medium |
| 29                              | 6.02 | Is the taxon likely to produce viable gametes or propagules (in the RA area)?                                                                                                | Yes | No information found.                                                                                                                                                                                                                                                                                                                                                                                                                    | Medium |
| 30                              | 6.03 | Is the taxon likely to hybridise naturally with native taxa?                                                                                                                 | Yes | Marić et al. (2012) point out that their results (STRUCTURE and DAS) support observation of wide spread introgression of grayling in the Soča River basin (Sušnik et al., 2004) and are also congruent with the results of wild male genotyping being annually performed in a frame of Adriatic grayling action plan (Jesenšek&Šumer, 2004), which have revealed only hybrid individuals with varying proportion of parental alleles (D. | High   |
| 31                              | 6.04 | Is the taxon likely to be hermaphroditic or to display asexual reproduction?                                                                                                 | No  | No information found.                                                                                                                                                                                                                                                                                                                                                                                                                    | Low    |
| 32                              | 6.05 | Is the taxon dependent on the presence of another taxon (or specific habitat features) to complete its life cycle?                                                           | Yes | Very sensitive to water quality, requires clean cold water (Kottelat&Freyhof, 2007).                                                                                                                                                                                                                                                                                                                                                     | High   |
| 33                              | 6.06 | Is the taxon known (or likely) to produce a large number of propagules or offspring within a short time span (e.g. < 1 year)?                                                | Yes | Depending on the size of the female, she may lay between 1,500 and 30,000 eggs (animaldiversity.org)                                                                                                                                                                                                                                                                                                                                     | Medium |
| 34                              | 6.07 | How many time units (days, months, years) does the taxon require to reach the age-at-first-reproduction?                                                                     | 3   | Spawns for the first time 2-3 years (Kottelat&Freyhof, 2007).                                                                                                                                                                                                                                                                                                                                                                            | High   |
| <b>7. Dispersal mechanisms</b>  |      |                                                                                                                                                                              |     |                                                                                                                                                                                                                                                                                                                                                                                                                                          |        |
| 35                              | 7.01 | How many potential internal vectors/pathways could the taxon use to disperse within the RA area (with suitable vectors)?                                                     | >1  | Stocking, sport fishing, angling (Piria et al., 2017).                                                                                                                                                                                                                                                                                                                                                                                   | High   |
| 36                              | 7.02 | Will any of these vectors/pathways bring the taxon in close proximity to one or more protected areas (e.g. MCZ, MPA, SSSI)?                                                  | Yes | European grayling was introduced to the Skadar Lake drainage area in the 1960s (Drecun, 1962; Knežević, 1981) and is present in the inland waters of Montenegro (Morača River) and may also be present in Skadar Lake (Talevski et al., 2009).                                                                                                                                                                                           | High   |
| 37                              | 7.03 | Does the taxon have a means of actively attaching itself to hard substrata (e.g. ship hulls, pilings, buoys) such that it enhances the likelihood of dispersal?              | No  | No information found.                                                                                                                                                                                                                                                                                                                                                                                                                    | Low    |
| 38                              | 7.04 | Is natural dispersal of the taxon likely to occur as eggs (for animals) or as propagules (for plants: seeds, spores) in the RA area?                                         | No  | No information found.                                                                                                                                                                                                                                                                                                                                                                                                                    | Low    |
| 39                              | 7.05 | Is natural dispersal of the taxon likely to occur as larvae/juveniles (for animals) or as fragments/seedlings (for plants) in the RA area?                                   | Yes | Proportions of stocked grayling juveniles recaptured by electric fishing in the fast-flowing section of the experimental stream (the rapids) were 9.9%, 46.7% and 16.6% after the first, second and third stocking, respectively (Carlstein&Eriksson, 1995).                                                                                                                                                                             | High   |
| 40                              | 7.06 | Are older life stages of the taxon likely to migrate in the RA area for reproduction?                                                                                        | Yes | Adults make short spawning migrations (Kottelat&Freyhof, 2007).                                                                                                                                                                                                                                                                                                                                                                          | High   |
| 41                              | 7.07 | Are propagules or eggs of the taxon likely to be dispersed in the RA area by other animals?                                                                                  | No  | No information found.                                                                                                                                                                                                                                                                                                                                                                                                                    | Low    |
| 42                              | 7.08 | Is dispersal of the taxon along any of the vectors/pathways mentioned in the previous seven questions (35-41; i.e. both unintentional or intentional) likely to be?          | No  | No information found.                                                                                                                                                                                                                                                                                                                                                                                                                    | Low    |
| 43                              | 7.09 | Is dispersal of the taxon density dependent?                                                                                                                                 | Yes | It has been found that density dependent mortality occurred at the highest levels of parent stock (Clark, 1992) High stocking density has also been found to increase downstream dispersion from a site (Cowx, 1994).                                                                                                                                                                                                                    | High   |
| <b>8. Tolerance attributes</b>  |      |                                                                                                                                                                              |     |                                                                                                                                                                                                                                                                                                                                                                                                                                          |        |
| 44                              | 8.01 | Is the taxon able to withstand being out of water for extended periods (e.g. minimum of one or more hours) at some stage of its life cycle?                                  | No  | No information found.                                                                                                                                                                                                                                                                                                                                                                                                                    | Low    |
| 45                              | 8.02 | Is the taxon tolerant of a wide range of water quality conditions relevant to that taxon? [In the Justification field, indicate the relevant water quality variable(s) being | Yes | They are in addition able to tolerate low oxygen tension of between 1.4 mg/L at 8°C to 1.8 mg/L at 20°C (Feldmuth&Erlksen, 1978).                                                                                                                                                                                                                                                                                                        | Medium |
| 46                              | 8.03 | Can the taxon be controlled or eradicated in the wild with chemical, biological, or other agents/means?                                                                      | No  | No information found.                                                                                                                                                                                                                                                                                                                                                                                                                    | Low    |
| 47                              | 8.04 | Is the taxon likely to tolerate or benefit from environmental/human disturbance?                                                                                             | No  | During the second half of the 20th century, a decline in the number of its populations has been observed, primarily because of the construction of hydroenergetic objects, intensified fishing and inadequate protection (Janković, 2010).                                                                                                                                                                                               | High   |
| 48                              | 8.05 | Is the taxon able to tolerate salinity levels that are higher or lower than those found in its usual environment?                                                            | No  | No information found.                                                                                                                                                                                                                                                                                                                                                                                                                    | Low    |
| 49                              | 8.06 | Are there effective natural enemies (predators) of the taxon present in the RA                                                                                               | No  | No information found.                                                                                                                                                                                                                                                                                                                                                                                                                    | Low    |
| <b>C. Climate change</b>        |      |                                                                                                                                                                              |     |                                                                                                                                                                                                                                                                                                                                                                                                                                          |        |

| 9. Climate change |      |                                                                                                                                                              |           |                                                                                                                                                                                                                                                      |        |
|-------------------|------|--------------------------------------------------------------------------------------------------------------------------------------------------------------|-----------|------------------------------------------------------------------------------------------------------------------------------------------------------------------------------------------------------------------------------------------------------|--------|
| 50                | 9.01 | Under the predicted future climatic conditions, are the risks of entry into the RA area posed by the taxon likely to increase, decrease or not change?       | No change | European grayling, even in comparison with other salmonids, shows high sensitivity to high temperature (Ibbotson et al., 2001; Jonsson&Jonsson, 2009) and exhibits narrow water quality requirements (Oberdorff et al., 2002; Uiblein et al., 2001). | Medium |
| 51                | 9.02 | Under the predicted future climatic conditions, are the risks of establishment posed by the taxon likely to increase, decrease or not change?                | No change | European grayling, even in comparison with other salmonids, shows high sensitivity to high temperature (Ibbotson et al., 2001; Jonsson&Jonsson, 2009) and exhibits narrow water quality requirements (Oberdorff et al., 2002; Uiblein et al., 2001). | Medium |
| 52                | 9.03 | Under the predicted future climatic conditions, are the risks of dispersal within the RA area posed by the taxon likely to increase, decrease or not change? | Increase  | European grayling, even in comparison with other salmonids, shows high sensitivity to high temperature (Ibbotson et al., 2001; Jonsson&Jonsson, 2009) and exhibits narrow water quality requirements (Oberdorff et al., 2002; Uiblein et al., 2001). | Medium |
| 53                | 9.04 | Under the predicted future climatic conditions, what is the likely magnitude of future potential impacts on biodiversity and/or ecological integrity/status? | No change | European grayling, even in comparison with other salmonids, shows high sensitivity to high temperature (Ibbotson et al., 2001; Jonsson&Jonsson, 2009) and exhibits narrow water quality requirements (Oberdorff et al., 2002; Uiblein et al., 2001). | Medium |
| 54                | 9.05 | Under the predicted future climatic conditions, what is the likely magnitude of future potential impacts on ecosystem structure and/or function?             | No change | European grayling, even in comparison with other salmonids, shows high sensitivity to high temperature (Ibbotson et al., 2001; Jonsson&Jonsson, 2009) and exhibits narrow water quality requirements (Oberdorff et al., 2002; Uiblein et al., 2001). | Medium |
| 55                | 9.06 | Under the predicted future climatic conditions, what is the likely magnitude of future potential impacts on ecosystem services/socio-economic factors?       | Lower     | European grayling, even in comparison with other salmonids, shows high sensitivity to high temperature (Ibbotson et al., 2001; Jonsson&Jonsson, 2009) and exhibits narrow water quality requirements (Oberdorff et al., 2002; Uiblein et al., 2001). | Medium |

| Statistics                                     |      |
|------------------------------------------------|------|
| Scores                                         |      |
| BRA                                            | 5.0  |
| BRA Outcome                                    | -    |
| BRA+CCA                                        | 5.0  |
| BRA+CCA Outcome                                | -    |
| Score partition                                |      |
| A. Biogeography/Historical                     | 1.0  |
| 1. Domestication/Cultivation                   | 2.0  |
| 2. Climate, distribution and introduction risk | 1.0  |
| 3. Invasive elsewhere                          | -2.0 |
| B. Biology/Ecology                             | 4.0  |
| 4. Undesirable (or persistence) traits         | 1.0  |
| 5. Resource exploitation                       | 0.0  |
| 6. Reproduction                                | 1.0  |
| 7. Dispersal mechanisms                        | 2.0  |
| 8. Tolerance attributes                        | 0.0  |
| C. Climate change                              | 0.0  |
| 9. Climate change                              | 0.0  |
| Answered Questions                             |      |
| Total                                          | 55   |
| A. Biogeography/Historical                     | 13   |
| 1. Domestication/Cultivation                   | 3    |
| 2. Climate, distribution and introduction risk | 5    |
| 3. Invasive elsewhere                          | 5    |
| B. Biology/Ecology                             | 36   |
| 4. Undesirable (or persistence) traits         | 12   |
| 5. Resource exploitation                       | 2    |
| 6. Reproduction                                | 7    |
| 7. Dispersal mechanisms                        | 9    |
| 8. Tolerance attributes                        | 6    |
| C. Climate change                              | 6    |
| 9. Climate change                              | 6    |
| Sectors affected                               |      |
| Commercial                                     | 3    |
| Environmental                                  | 1    |
| Species or population nuisance traits          | 4    |

| Thresholds |      |
|------------|------|
| BRA        | -    |
| BRA+CCA    | -    |
| Confidence |      |
| BRA+CCA    | 0.47 |
| BRA        | 0.47 |
| CCA        | 0.50 |

| Date and Time       |
|---------------------|
| 28/05/2021 09:07:18 |

AS-ISK v2

| Taxon and Assessor details         |                                         |
|------------------------------------|-----------------------------------------|
| Category                           | Fishes and Lampreys (freshwater)        |
| Taxon name                         | <i>Thymallus thymallus</i>              |
| Common name                        | grayling                                |
| Assessor                           | Tena Radocaj                            |
| Risk screening context             |                                         |
| Reason and socio-economic benefits |                                         |
| Risk assessment area               | Danube & Adriatic basins BA, HR, ME, RS |
| Taxonomy                           |                                         |
| Native range                       |                                         |
| Introduced range                   |                                         |
| URL                                |                                         |

|                                                |      | Response                                                                                                                                                                | Justification (references and/or other information) | Confidence                                                                                                                                                                                                                                                                                                                                                                                          |           |
|------------------------------------------------|------|-------------------------------------------------------------------------------------------------------------------------------------------------------------------------|-----------------------------------------------------|-----------------------------------------------------------------------------------------------------------------------------------------------------------------------------------------------------------------------------------------------------------------------------------------------------------------------------------------------------------------------------------------------------|-----------|
| A. Biogeography/Historical                     |      |                                                                                                                                                                         |                                                     |                                                                                                                                                                                                                                                                                                                                                                                                     |           |
| 1. Domestication/Cultivation                   |      |                                                                                                                                                                         |                                                     |                                                                                                                                                                                                                                                                                                                                                                                                     |           |
| 1                                              | 1.01 | Has the taxon been the subject of domestication (or cultivation) for at least 20 generations?                                                                           | Yes                                                 | In karstic rivers Cetina and Gacka                                                                                                                                                                                                                                                                                                                                                                  | Very high |
| 2                                              | 1.02 | Is the taxon harvested in the wild and likely to be sold or used in its live form?                                                                                      | Yes                                                 | The Thymallus t. is grown on for human consumption in Slovenia. (FAO)                                                                                                                                                                                                                                                                                                                               | High      |
| 3                                              | 1.03 | Does the taxon have invasive races, varieties, sub-taxa or congeners?                                                                                                   | No                                                  | no                                                                                                                                                                                                                                                                                                                                                                                                  | Very high |
| 2. Climate, distribution and introduction risk |      |                                                                                                                                                                         |                                                     |                                                                                                                                                                                                                                                                                                                                                                                                     |           |
| 4                                              | 2.01 | How similar are the climatic conditions of the Risk Assessment (RA) area and the taxon's native range?                                                                  | High                                                | The similarity between climatic conditions RA area and native range is high. I use climatch.                                                                                                                                                                                                                                                                                                        | Very high |
| 5                                              | 2.02 | What is the quality of the climate matching data?                                                                                                                       | High                                                | The quality of the climate matching data is medium.                                                                                                                                                                                                                                                                                                                                                 | Very high |
| 6                                              | 2.03 | Is the taxon already present outside of captivity in the RA area?                                                                                                       | Yes                                                 | It is present outside of captivity in the RA area.                                                                                                                                                                                                                                                                                                                                                  | High      |
| 7                                              | 2.04 | How many potential vectors could the taxon use to enter in the RA area?                                                                                                 | None                                                | It is present in the RA area.                                                                                                                                                                                                                                                                                                                                                                       | High      |
| 8                                              | 2.05 | Is the taxon currently found in close proximity to, and likely to enter into, the RA area in the near future (e.g. unintentional and intentional introductions)?        | Not applicable                                      | It is present in the RA area.                                                                                                                                                                                                                                                                                                                                                                       | High      |
| 3. Invasive elsewhere                          |      |                                                                                                                                                                         |                                                     |                                                                                                                                                                                                                                                                                                                                                                                                     |           |
| 9                                              | 3.01 | Has the taxon become naturalised (established viable populations) outside its                                                                                           | Yes                                                 | Introduced over most of southern and central Finland, established viable populations. (IUCN)                                                                                                                                                                                                                                                                                                        | Very high |
| 10                                             | 3.02 | In the taxon's introduced range, are there known adverse impacts to wild stocks or commercial taxa?                                                                     | No                                                  | no data available                                                                                                                                                                                                                                                                                                                                                                                   | Medium    |
| 11                                             | 3.03 | In the taxon's introduced range, are there known adverse impacts to aquaculture?                                                                                        | No                                                  | in this areas there is no such activities                                                                                                                                                                                                                                                                                                                                                           | Very high |
| 12                                             | 3.04 | In the taxon's introduced range, are there known adverse impacts to ecosystem                                                                                           | No                                                  | no data                                                                                                                                                                                                                                                                                                                                                                                             | Medium    |
| 13                                             | 3.05 | In the taxon's introduced range, are there known adverse socio-economic impacts?                                                                                        | No                                                  | no data                                                                                                                                                                                                                                                                                                                                                                                             | Low       |
| B. Biology/ Ecology                            |      |                                                                                                                                                                         |                                                     |                                                                                                                                                                                                                                                                                                                                                                                                     |           |
| 4. Undesirable (or persistence) traits         |      |                                                                                                                                                                         |                                                     |                                                                                                                                                                                                                                                                                                                                                                                                     |           |
| 14                                             | 4.01 | Is it likely that the taxon will be poisonous or pose other risks to human health?                                                                                      | No                                                  | no                                                                                                                                                                                                                                                                                                                                                                                                  | Very high |
| 15                                             | 4.02 | Is it likely that the taxon will smother one or more native taxa (that are not threatened or protected)?                                                                | No                                                  | no data                                                                                                                                                                                                                                                                                                                                                                                             | Medium    |
| 16                                             | 4.03 | Are there any threatened or protected taxa that the non-native taxon would parasitise in the RA area?                                                                   | No                                                  | no                                                                                                                                                                                                                                                                                                                                                                                                  | Very high |
| 17                                             | 4.04 | Is the taxon adaptable in terms of climatic and other environmental conditions, thus enhancing its potential persistence if it has invaded or could invade the RA area? | Yes                                                 | The taxon is adaptable of climatic and other environmental conditions.                                                                                                                                                                                                                                                                                                                              | Medium    |
| 18                                             | 4.05 | Is the taxon likely to disrupt food-web structure/function in aquatic ecosystems if it has invaded or is likely to invade the RA                                        | No                                                  | The taxon not disrupt food-web structure/function in aquatic ecosystem in the RA area. Personal opinion- no data                                                                                                                                                                                                                                                                                    | Low       |
| 19                                             | 4.06 | Is the taxon likely to exert adverse impacts on ecosystem services in the RA area?                                                                                      | No                                                  | The taxon no impacts on ecosystem services in the RA area.                                                                                                                                                                                                                                                                                                                                          | Low       |
| 20                                             | 4.07 | Is it likely that the taxon will host, and/or act as a vector for, recognised pests and infectious agents that are endemic in the RA                                    | Yes                                                 | Yes, the taxon may be a host or vector of known pests and infectious agents endemic to RA area. Because in every area exist infectious agents and pests.                                                                                                                                                                                                                                            | Low       |
| 21                                             | 4.08 | Is it likely that the taxon will host, and/or act as a vector for, recognised pests and infectious agents that are absent from (novel to) the RA area?                  | Yes                                                 | The ability of T. thymallus to carry an infection for long periods increases the potential transfer of G. salaris to other susceptible hosts. (Paladini, G., Hansen, H., Williams, C. F., Taylor, N. G., Rubio-Mejía, O. L., Denholm, S. J., ... & Shinn, A. P. (2014). Reservoir hosts for Gyrodactylus salaris may play a more significant role in epidemics than previously thought. Parasites & | High      |
| 22                                             | 4.09 | Is it likely that the taxon will achieve a body size that will make it more likely to be released from captivity?                                                       | Yes                                                 | large fish                                                                                                                                                                                                                                                                                                                                                                                          | Very high |
| 23                                             | 4.10 | Is the taxon capable of sustaining itself in a range of water velocity conditions (e.g. versatile in habitat use)?                                                      | No                                                  | usually live in running waters but there is lacustrine populations too                                                                                                                                                                                                                                                                                                                              | High      |
| 24                                             | 4.11 | Is it likely that the taxon's mode of existence (e.g. excretion of by-products) or behaviours (e.g. feeding) will reduce habitat quality for native taxa?               | No                                                  | no data available                                                                                                                                                                                                                                                                                                                                                                                   | High      |

|                                 |      |                                                                                                                                                                              |                |                                                                                                                                                                                                                    |           |
|---------------------------------|------|------------------------------------------------------------------------------------------------------------------------------------------------------------------------------|----------------|--------------------------------------------------------------------------------------------------------------------------------------------------------------------------------------------------------------------|-----------|
| 25                              | 4.12 | Is the taxon likely to maintain a viable population even when present in low densities (or persisting in adverse conditions by way of a dormant form)?                       | Yes            | Population crash with expolotation eg. angling                                                                                                                                                                     | Very high |
| <b>5. Resource exploitation</b> |      |                                                                                                                                                                              |                |                                                                                                                                                                                                                    |           |
| 26                              | 5.01 | Is the taxon likely to consume threatened or protected native taxa in the RA area?                                                                                           | No             | Thymallus t. not consume threatened of protected native taxa in the RA area.                                                                                                                                       | Low       |
| 27                              | 5.02 | Is the taxon likely to sequester food resources (including nutrients) to the detriment of native taxa in the RA area?                                                        | Not applicable | not applicable                                                                                                                                                                                                     | High      |
| <b>6. Reproduction</b>          |      |                                                                                                                                                                              |                |                                                                                                                                                                                                                    |           |
| 28                              | 6.01 | Is the taxon likely to exhibit parental care and/or to reduce age-at-maturity in response to environmental conditions?                                                       | Yes            | Males defending territories at spawning site                                                                                                                                                                       | Very high |
| 29                              | 6.02 | Is the taxon likely to produce viable gametes or propagules (in the RA area)?                                                                                                | Yes            | yes                                                                                                                                                                                                                | Very high |
| 30                              | 6.03 | Is the taxon likely to hybridise naturally with native taxa?                                                                                                                 | Yes            | In Slovakia and Czech republic was introduced T. baicalensis and they produce hybrids                                                                                                                              | High      |
| 31                              | 6.04 | Is the taxon likely to be hermaphroditic or to display asexual reproduction?                                                                                                 | No             | no                                                                                                                                                                                                                 | Very high |
| 32                              | 6.05 | Is the taxon dependent on the presence of another taxon (or specific habitat features) to complete its life cycle?                                                           | No             | no                                                                                                                                                                                                                 | Very high |
| 33                              | 6.06 | Is the taxon known (or likely) to produce a large number of propagules or offspring within a short time span (e.g. < 1 year)?                                                | Yes            | Female grayling can lay between 421 – 36,000 eggs per breeding season (Peter Jørgen Tønnessen Haddeland, 2012 MSc thesis)                                                                                          | Very high |
| 34                              | 6.07 | How many time units (days, months, years) does the taxon require to reach the age-at-first-reproduction?                                                                     | 2              | kottelat and Freyhof                                                                                                                                                                                               | Very high |
| <b>7. Dispersal mechanisms</b>  |      |                                                                                                                                                                              |                |                                                                                                                                                                                                                    |           |
| 35                              | 7.01 | How many potential internal vectors/pathways could the taxon use to disperse within the RA area (with suitable vectors/pathways)?                                            | >1             | 1. human impact (fishing) 2. flooding 3. followed by natural spread via natural and manmade watercourses                                                                                                           | Medium    |
| 36                              | 7.02 | Will any of these vectors/pathways bring the taxon in close proximity to one or more protected areas (e.g. MCZ, MPA, SSSI)?                                                  | Yes            | All of this vectors/pathways bring taxon in protected areas.                                                                                                                                                       | Low       |
| 37                              | 7.03 | Does the taxon have a means of actively attaching itself to hard substrata (e.g. ship hulls, pilings, buoys) such that it enhances the likelihood of dispersal?              | No             | no                                                                                                                                                                                                                 | Low       |
| 38                              | 7.04 | Is natural dispersal of the taxon likely to occur as eggs (for animals) or as propagules (for plants: seeds, spores) in the RA area?                                         | No             | They have nests                                                                                                                                                                                                    | Very high |
| 39                              | 7.05 | Is natural dispersal of the taxon likely to occur as larvae/juveniles (for animals) or as fragments/seedlings (for plants) in the RA area?                                   | Yes            | Larvae live in open water below surface                                                                                                                                                                            | High      |
| 40                              | 7.06 | Are older life stages of the taxon likely to migrate in the RA area for reproduction?                                                                                        | Yes            | Adults makes short spawning migrations                                                                                                                                                                             | Very high |
| 41                              | 7.07 | Are propagules or eggs of the taxon likely to be dispersed in the RA area by other animals?                                                                                  | No             | no                                                                                                                                                                                                                 | Very high |
| 42                              | 7.08 | Is dispersal of the taxon along any of the vectors/pathways mentioned in the previous seven questions (35–41; i.e. both unintentional or intentional) likely to be           | Yes            | There is a possibility of a high rate of spread of taxa. Eg. if a fertilized individual enters a new area by any means of expansion.                                                                               | Low       |
| 43                              | 7.09 | Is dispersal of the taxon density dependent?                                                                                                                                 | No             | no                                                                                                                                                                                                                 | Very high |
| <b>8. Tolerance attributes</b>  |      |                                                                                                                                                                              |                |                                                                                                                                                                                                                    |           |
| 44                              | 8.01 | Is the taxon able to withstand being out of water for extended periods (e.g. minimum of one or more hours) at some stage of its life cycle?                                  | No             | very sensitive                                                                                                                                                                                                     | Very high |
| 45                              | 8.02 | Is the taxon tolerant of a wide range of water quality conditions relevant to that taxon? [In the Justification field, indicate the relevant water quality variable(s) being | No             | Very sensitive to pollution                                                                                                                                                                                        | Very high |
| 46                              | 8.03 | Can the taxon be controlled or eradicated in the wild with chemical, biological, or other agents/means?                                                                      | Not applicable | no regulation                                                                                                                                                                                                      | Very high |
| 47                              | 8.04 | Is the taxon likely to tolerate or benefit from environmental/human disturbance?                                                                                             | No             | no                                                                                                                                                                                                                 | Very high |
| 48                              | 8.05 | Is the taxon able to tolerate salinity levels that are higher or lower than those found in its usual environment?                                                            | No             | only freshwater                                                                                                                                                                                                    | Very high |
| 49                              | 8.06 | Are there effective natural enemies (predators) of the taxon present in the RA                                                                                               | No             | Cormorants are present there and probably their pressure are high                                                                                                                                                  | Medium    |
| <b>C. Climate change</b>        |      |                                                                                                                                                                              |                |                                                                                                                                                                                                                    |           |
| <b>9. Climate change</b>        |      |                                                                                                                                                                              |                |                                                                                                                                                                                                                    |           |
| 50                              | 9.01 | Under the predicted future climatic conditions, are the risks of entry into the RA area posed by the taxon likely to increase, decrease or not change?                       | Not applicable | not applicable                                                                                                                                                                                                     | High      |
| 51                              | 9.02 | Under the predicted future climatic conditions, are the risks of establishment posed by the taxon likely to increase, decrease or not change?                                | Decrease       | The risks of establishing self-sustaining populations are in decrease. Grayling show high sensitivity to high temperature (Ibbotson et al. 2001; Jonsson and Jonsson 2009).                                        | High      |
| 52                              | 9.03 | Under the predicted future climatic conditions, are the risks of dispersal within the RA area posed by the taxon likely to increase, decrease or not change?                 | Decrease       | The risks of dispersal within the RA area is decreased. Under conditions of climate change, the projections for 2050 predict predominantly a significant loss of high suitability habitat for Thymallus thymallus. | Medium    |

|    |      |                                                                                                                                                              |       |                                                                                 |     |
|----|------|--------------------------------------------------------------------------------------------------------------------------------------------------------------|-------|---------------------------------------------------------------------------------|-----|
| 53 | 9.04 | Under the predicted future climatic conditions, what is the likely magnitude of future potential impacts on biodiversity and/or ecological integrity/status? | Lower | Future potential impacts on biodiversity/ecological status is lower.            | Low |
| 54 | 9.05 | Under the predicted future climatic conditions, what is the likely magnitude of future potential impacts on ecosystem structure and/or function?             | Lower | The future potential impacts on ecosystem structure or function is lower.       | Low |
| 55 | 9.06 | Under the predicted future climatic conditions, what is the likely magnitude of future potential impacts on ecosystem services/socio-economic factors?       | Lower | Future potential impacts on ecosystem services/socio-economic factors is lower. | Low |

| Statistics                                     |              |
|------------------------------------------------|--------------|
| Scores                                         |              |
| <b>BRA</b>                                     | <b>13.0</b>  |
| <b>BRA Outcome</b>                             | <b>-</b>     |
| <b>BRA+CCA</b>                                 | <b>3.0</b>   |
| <b>BRA+CCA Outcome</b>                         | <b>-</b>     |
| Score partition                                |              |
| <b>A. Biogeography/Historical</b>              | <b>4.0</b>   |
| 1. Domestication/Cultivation                   | 2.0          |
| 2. Climate, distribution and introduction risk | 0.0          |
| 3. Invasive elsewhere                          | 2.0          |
| <b>B. Biology/Ecology</b>                      | <b>9.0</b>   |
| 4. Undesirable (or persistence) traits         | 5.0          |
| 5. Resource exploitation                       | 0.0          |
| 6. Reproduction                                | 4.0          |
| 7. Dispersal mechanisms                        | 2.0          |
| 8. Tolerance attributes                        | -2.0         |
| <b>C. Climate change</b>                       | <b>-10.0</b> |
| 9. Climate change                              | -10.0        |
| Answered Questions                             |              |
| <b>Total</b>                                   | <b>55</b>    |
| <b>A. Biogeography/Historical</b>              | <b>13</b>    |
| 1. Domestication/Cultivation                   | 3            |
| 2. Climate, distribution and introduction risk | 5            |
| 3. Invasive elsewhere                          | 5            |
| <b>B. Biology/Ecology</b>                      | <b>36</b>    |
| 4. Undesirable (or persistence) traits         | 12           |
| 5. Resource exploitation                       | 2            |
| 6. Reproduction                                | 7            |
| 7. Dispersal mechanisms                        | 9            |
| 8. Tolerance attributes                        | 6            |
| <b>C. Climate change</b>                       | <b>6</b>     |
| 9. Climate change                              | 6            |
| Sectors affected                               |              |
| <b>Commercial</b>                              | <b>3</b>     |
| <b>Environmental</b>                           | <b>-3</b>    |
| <b>Species or population nuisance traits</b>   | <b>6</b>     |

| Thresholds     |             |
|----------------|-------------|
| <b>BRA</b>     | <b>-</b>    |
| <b>BRA+CCA</b> | <b>-</b>    |
| Confidence     |             |
| <b>BRA+CCA</b> | <b>0.73</b> |
| <b>BRA</b>     | <b>0.77</b> |
| <b>CCA</b>     | <b>0.46</b> |

| Date and Time       |  |
|---------------------|--|
| 02/06/2020 08:54:27 |  |
